# Supplementary material for: Calcium Prevents Tumorigenesis in a Mouse Model of Colorectal Cancer
Source: PLoS One. 2011 Aug 17;6(8):e22566. doi: 10.1371/journal.pone.0022566 (PMC3157344; doi:10.1371/journal.pone.0022566)
Supplement: Table S1 — Complete list of differentially expressed genes in the DMH group compared with the Control group. (XLS) [file pone.0022566.s001.xls]

## Sheet: Sheet1
Table S1.The complete list of differentially expressed genes in the DMH group compared with Control group.
# Fold-Change cut-off : 1.5
# P-value cut-off: 0.1
# Condition pairs: [DMH] vs [Control]
# Column A: ProbeName, it represents probe name.
# Column B: p-value, p-value calculated from TTest.
# Column C: Fold change, the absolute ratio (no log scale) of normalized intensities between two conditions.
# Column D: Regulation, it depicts which one of the group has greater or lower intensity values wrt other grodown.
# Column E,F: Raw Intensity of each grodown (averaged intensity of replicate samples).
# Column G,H: Normalized Intensity of each grodown (averaged intensity of replicate samples).
# Column I~N: Raw Intensity of each sample.
# Column O~T: log2 value of Normalized Intensity of each sample.
# Column U~AD: annotations to each probe, including GenbankAccession, GenomicCoordinates, GeneSymbol, Description, GO annotations, RefSeqAccession, UniGeneID, EntrezGeneID, EnsemblID, TIGRID
	P-value Fold change and Regulation			Grodown--Raw Intensity		Grodown--Normalized Intensity		Raw Intensity						Normalized Intensity						Annotations
ProbeName	p-value	FCAbsolute	regulation	[Control](raw)	[DMH](raw)	[Control](normalized)	[DMH](normalized)	[Control-1](raw)	[Control-2](raw)	[Control-3](raw)	[DMH-1](raw)	[DMH-2](raw)	[DMH-3](raw)	[Control-1](normalized)	[Control-2](normalized)	[Control-3](normalized)	[DMH-1](normalized)	[DMH-2](normalized)	[DMH-3](normalized)	GenbankAccession	GenomicCoordinates	GeneSymbol	Description	Go	RefSeqAccession	UniGeneID	EntrezGeneID	EnsemblID	TIGRID
A_51_P280918	0.00139584	1.74605	down	862.178	1026.57	4.53873	3.73464	878.049	943.304	765.182	868.763	1098.42	1112.53	4.47748	4.58314	4.55558	3.541	3.8252	3.83771	NM_028007	chr8:88241877-88241818	Itfg1	Mus musculus integrin alpha FG-GAP repeat containing 1 (Itfg1), mRNA [NM_028007]	GO:0005576|GO:0005515|GO:0016020|GO:0008150|GO:0016021|GO:0005575	NM_028007	Mm.61018	71927	ENSMUST00000034140	TC1602977
A_52_P258194	0.0686397	1.79624	down	69.403	76.4992	0.825473	-0.0195036	104.415	53.6931	50.1008	93.511	69.2118	66.7747	1.40551	0.448224	0.622689	0.32525	-0.163075	-0.220686	NM_145123	chr19:42358630-42358129	Crtac1	Mus musculus cartilage acidic protein 1 (Crtac1), mRNA [NM_145123]	GO:0005576|GO:0008150|GO:0003674|GO:0005578|GO:0005575|GO:0005509	NM_145123	Mm.313558	72832	ENSMUST00000048630	TC1582416
A_52_P214630	0.011411	1.89658	down	2211.77	2456.94	5.90076	4.97735	2055.2	2373.93	2206.19	1839.42	2786	2745.38	5.70438	5.91462	6.08327	4.62322	5.16796	5.14088	NM_011448	chr11:112648809-112648868	Sox9	Mus musculus SRY-box containing gene 9 (Sox9), mRNA [NM_011448]	GO:0060008|GO:0051216|GO:0006350|GO:0030154|GO:0048709|GO:0030238|GO:0007283|GO:0032331|GO:0045892|GO:0045449|GO:0005634|GO:0010843|GO:0060512|GO:0003677|GO:0016481|GO:0045662|GO:0001502|GO:0008584|GO:0019100|GO:0045165|GO:0010628|GO:0005515|GO:0003700|GO:0001837|GO:0030502|GO:0060517|GO:0045944|GO:0042981|GO:0060009|GO:0007507|GO:0060350|GO:0006355|GO:0001708|GO:0042127|GO:0014032|GO:0043565|GO:…	NM_011448	Mm.286407	20682	ENSMUST00000000579	TC1574097
A_52_P427024	0.0190005	1.71103	down	10252.2	12316.4	8.10321	7.32835	8397.91	11110.8	11247.7	12338.4	12384.5	12226.2	7.73513	8.14124	8.43327	7.36906	7.32023	7.29577	NM_010700	chr9:21554277-21554336	Ldlr	Mus musculus low density lipoprotein receptor (Ldlr), mRNA [NM_010700]	GO:0004872|GO:0005515|GO:0006897|GO:0005886|GO:0042632|GO:0008203|GO:0005901|GO:0030169|GO:0006869|GO:0034362|GO:0005768|GO:0005905|GO:0042157|GO:0006810|GO:0005509|GO:0006629|GO:0016020|GO:0030301|GO:0008202|GO:0005041|GO:0030229|GO:0042159|GO:0016021	NM_010700	Mm.3213	16835	ENSMUST00000034713	TC1596367
A_52_P669145	0.00439626	2.42574	down	1195.76	1036.03	5.01324	3.73482	1101.33	1206.01	1279.94	793.111	1183.77	1131.21	4.80435	4.93759	5.29779	3.40956	3.93315	3.86174	NM_001005247	chr7:54016263-54016204	Hps5	Mus musculus Hermansky-Pudlak syndrome 5 homolog (human) (Hps5), transcript variant 1, mRNA [NM_001005247]	GO:0007596|GO:0006996|GO:0005515|GO:0043473|GO:0005737	NM_001005247	Mm.379442	246694	ENSMUST00000107653	TC1593203
A_51_P318564	0.0114802	1.9303	down	122.753	132.544	1.72536	0.776536	106.69	129.696	131.873	123.336	115.537	158.76	1.4366	1.72055	2.01894	0.724631	0.576186	1.02879	NM_198703	chr6:119987711-119987652	Wnk1	Mus musculus WNK lysine deficient protein kinase 1 (Wnk1), transcript variant 1, mRNA [NM_198703]	GO:0004672|GO:0005515|GO:0000287|GO:0003084|GO:0005524|GO:0005626|GO:0016740|GO:0000166|GO:0019870|GO:0030291|GO:0046777|GO:0004674|GO:0050794|GO:0042598|GO:0006811|GO:0016301|GO:0006468|GO:0004860|GO:0005737|GO:0033673|GO:0005625	NM_198703	Mm.333349	232341	ENSMUST00000088644	TC1599371
A_52_P267543	0.000217771	2.25047	down	418.8	386.749	3.50133	2.3311	440.849	412.8	402.75	345.653	407.248	407.346	3.48346	3.39086	3.62967	2.21137	2.39375	2.38819	NM_145418	chr10:7493877-7493818	BC013529	Mus musculus cDNA sequence BC013529 (BC013529), mRNA [NM_145418]	GO:0016020|GO:0008150|GO:0003674|GO:0016021|GO:0005575	NM_145418	Mm.471825	215751	ENSMUST00000124838	TC1713608
A_51_P144206	0.000507452	4.6136	down	188.36	85.8786	2.34399	0.138094	188.873	208.391	167.816	107.84	67.9634	81.8321	2.26059	2.4047	2.36666	0.530936	-0.189335	0.0726795	BG963265			BG963265 602828342F1 NCI_CGAP_Co24 Mus musculus cDNA clone IMAGE:4983106 5', mRNA sequence [BG963265]
A_51_P114722	0.00104794	3.81608	down	15809.3	8517.32	8.72719	6.7951	13349.5	15433.4	18645.1	8053.89	8635.28	8862.8	8.40381	8.61533	9.16243	6.75366	6.80001	6.83163	NM_019545	chr3:98678723-98678664	Hao2	Mus musculus hydroxyacid oxidase 2 (Hao2), mRNA [NM_019545]	GO:0005777|GO:0051260|GO:0010181|GO:0008152|GO:0005739|GO:0016491|GO:0018924|GO:0003824|GO:0003973|GO:0055114	NM_019545	Mm.281874	56185	ENSMUST00000029464	TC1580327
A_52_P440044	0.00253214	1.55825	down	191.524	254.781	2.37309	1.73317	198.322	185.314	190.936	252.745	256.174	255.422	2.33102	2.23539	2.55287	1.75973	1.72496	1.71483	NM_025780	chr10:114809290-114809231	Thap2	Mus musculus THAP domain containing, apoptosis associated protein 2 (Thap2), mRNA [NM_025780]	GO:0003676|GO:0046872|GO:0008150|GO:0003674|GO:0003677|GO:0005575	NM_025780	Mm.32314	66816	ENSMUST00000020346	TC1583977
A_52_P413257	0.0503939	1.7515	down	209.226	242.548	2.47029	1.6617	154.431	217.291	255.957	242.517	234.645	250.482	1.97014	2.46504	2.97568	1.70013	1.59832	1.68665	NM_026039	chr4:132015362-132015303	Med18	Mus musculus mediator of RNA polymerase II transcription, subunit 18 homolog (yeast) (Med18), mRNA [NM_026039]	GO:0016455|GO:0005634|GO:0008150|GO:0006350|GO:0003674|GO:0006357|GO:0016592|GO:0045449	NM_026039	Mm.45929	67219	ENSMUST00000102567	TC1584555
A_51_P140321	2.091e-05	2.45469	down	1502.21	1260.62	5.335	4.03947	1646.55	1600.67	1259.4	1303.09	1260.12	1218.66	5.38455	5.34602	5.27445	4.12591	4.02332	3.96917	NM_026779	chr18:24859890-24859949	Mocos	Mus musculus molybdenum cofactor sulfurase (Mocos), mRNA [NM_026779]	GO:0030151|GO:0016829|GO:0008150|GO:0003674|GO:0008152|GO:0006777|GO:0005575|GO:0003824|GO:0030170	NM_026779	Mm.28252	68591	ENSMUST00000068006	TC1606108
A_51_P425798	0.00331112	1.84577	down	34.5509	38.9866	-0.0971152	-0.981334	34.8949	34.3537	34.4042	41.7748	41.229	33.956	-0.175739	-0.196047	0.080441	-0.837252	-0.910432	-1.19632	NM_029920	chr5:149125325-149125384	Mtus2	Mus musculus microtubule associated tumor sdownpressor candidate 2 (Mtus2), mRNA [NM_029920]	GO:0005874|GO:0005856|GO:0005737	NM_029920	Mm.244177	77521	ENSMUST00000085554	TC1584915
A_51_P102122	0.0145581	1.8763	down	21.8078	24.4798	-0.761389	-1.66928	22.4826	21.1858	21.7548	30.1753	23.7261	19.5381	-0.809944	-0.893415	-0.58081	-1.30652	-1.70762	-1.99369	NM_031189	chr1:136188874-136188933	Myog	Mus musculus myogenin (Myog), mRNA [NM_031189]	GO:0003700|GO:0001503|GO:0007517|GO:0007275|GO:0030154|GO:0003705|GO:0045944|GO:0006355|GO:0045449|GO:0030528|GO:0005634|GO:0016563|GO:0007519|GO:0003677|GO:0048741	NM_031189	Mm.16528	17928	ENSMUST00000027730	TC1581588
A_52_P666646	0.000772975	2.60713	down	4021.9	3227.08	6.75964	5.37718	4312.8	4248.24	3504.66	2554.76	3785.62	3340.86	6.77373	6.75421	6.75099	5.09716	5.61029	5.42409	NM_178682	chr12:81981584-81981643	4933426M11Rik	Mus musculus RIKEN cDNA 4933426M11 gene (4933426M11Rik), mRNA [NM_178682]	GO:0008150|GO:0003674|GO:0005575	NM_178682	Mm.341776	217684	ENSMUST00000085243	TC1721813
A_51_P177605	0.00152353	1.55482	down	492.542	655.422	3.73044	3.0937	542.813	499.607	435.207	683.02	683.338	599.908	3.78363	3.66621	3.74148	3.19397	3.14044	2.94668	NM_172730	chr6:91849675-91849734	C130022K22Rik	Mus musculus RIKEN cDNA C130022K22 gene (C130022K22Rik), mRNA [NM_172730]	GO:0008150|GO:0003674|GO:0005575	NM_172730	Mm.234879	232236	ENSMUST00000037793	TC1581514
A_51_P327285	8.72274e-05	3.01681	down	710.735	488.146	4.26219	2.66916	778.462	668.82	684.924	452.764	514.558	497.114	4.3038	4.08703	4.39573	2.6008	2.73117	2.67552	NM_021388	chr3:115731587-115731646	Extl2	Mus musculus exostoses (multiple)-like 2 (Extl2), transcript variant 1, mRNA [NM_021388]	GO:0016757|GO:0046872|GO:0016020|GO:0016740|GO:0031227|GO:0001888|GO:0016758|GO:0016021|GO:0005783	NM_021388	Mm.41739	58193	ENSMUST00000106502	TC1577118
A_51_P258721	0.000943029	1.88171	down	6732.85	7313.77	7.48715	6.5751	7507.31	7545.38	5145.84	7405.7	6886.88	7648.73	7.5734	7.58294	7.30512	6.63261	6.47361	6.61909	NM_012034	chr17:25511199-25511258	Tpsg1	Mus musculus tryptase gamma 1 (Tpsg1), mRNA [NM_012034]	GO:0006508|GO:0004252|GO:0016787|GO:0016020|GO:0008236|GO:0008233|GO:0016021|GO:0003824	NM_012034	Mm.180108	26945	ENSMUST00000024999	TC1586939
A_51_P262432	0.0543804	1.56721	down	24477.3	32062.5	9.35645	8.70825	22073.1	21754.7	29604	33091.5	31910.2	31185.8	9.12932	9.11059	9.82943	8.79236	8.68571	8.64669	NM_011358	chr11:116711237-116711211	Sfrs2	Mus musculus splicing factor, arginine/serine-rich 2 (SC-35) (Sfrs2), mRNA [NM_011358]	GO:0003676|GO:0005634|GO:0005515|GO:0016607|GO:0005681|GO:0008380|GO:0003723|GO:0006397|GO:0000166	NM_011358	Mm.21841	20382	ENSMUST00000136914	NP056412
A_52_P493882	7.64532e-06	5.49816	down	260.564	97.8204	2.81046	0.351512	296.413	252.145	233.133	101.194	94.1232	98.1442	2.91078	2.67967	2.84094	0.439163	0.280458	0.334915	NR_015493	chrX:106081805-106081864	2810403D21Rik	Mus musculus RIKEN cDNA 2810403D21 gene (2810403D21Rik), non-coding RNA [NR_015493]	GO:0008150|GO:0003674|GO:0005575	NR_015493	Mm.160066	69964		TC1607935
A_51_P235440	0.0492153	1.73648	down	44.7742	52.6526	0.251132	-0.545035	33.9856	46.5126	53.8245	57.1039	48.0838	52.7701	-0.21383	0.241108	0.726117	-0.386297	-0.688541	-0.560267	AK016197	chr11:70219178-70216246		proline, glutamic acid and leucine rich protein 1 Gene [Source:MGI Symbol;Acc:MGI:1922523] [ENSMUST00000019066]			Mm.340601		ENSMUST00000019066	TC1591058
A_52_P25008	9.36239e-05	2.42568	down	841.006	718.975	4.50617	3.22778	904.337	819.278	799.405	673.459	768.408	715.058	4.52003	4.37977	4.61871	3.17363	3.30971	3.2	NM_175251	chr15:96235158-96235217	Arid2	Mus musculus AT rich interactive domain 2 (ARID, RFX-like) (Arid2), mRNA [NM_175251]	GO:0008134|GO:0005667|GO:0016563|GO:0045944	NM_175251	Mm.17166	77044	ENSMUST00000096250	TC1598368
A_52_P925197	0.00362694	3.7245	down	3180.31	1670.99	6.33687	4.43983	3514.59	4235.64	1790.71	1842.98	1710.74	1459.25	6.47846	6.74992	5.78224	4.62601	4.46438	4.2291	NM_007570	chr1:135973975-135973916	Btg2	Mus musculus B-cell translocation gene 2, anti-proliferative (Btg2), mRNA [NM_007570]	GO:0006974|GO:0005515|GO:0006350|GO:0030182|GO:0043066|GO:0045768|GO:0045449|GO:0009952|GO:0006479	NM_007570	Mm.392646	12227	ENSMUST00000020692	TC1765651
A_51_P329366	2.68291e-05	4.04859	down	151.195	76.459	2.01396	-0.003462	151.287	180.568	121.729	75.1314	76.3297	77.916	1.94046	2.19796	1.90345	0.00953054	-0.0218482	0.00193167	NM_080448	chr6:112672282-112672223	Srgap3	Mus musculus SLIT-ROBO Rho GTPase activating protein 3 (Srgap3), mRNA [NM_080448]	GO:0005515|GO:0008150|GO:0005096|GO:0007165|GO:0005575|GO:0005622	NM_080448	Mm.236401	259302	ENSMUST00000113171	TC1586243
A_52_P692753	0.0489051	2.82203	down	1153.19	953.819	4.96278	3.46604	1125.26	1122.78	1211.54	401.471	1218	1241.98	4.83536	4.83442	5.21855	2.42734	3.97428	3.99651		chr5:144267624-144267576
A_51_P158538	0.00538373	2.10252	down	4791.12	4671.66	6.99923	5.92712	3886.34	5792.92	4694.1	4415.8	5074.45	4524.72	6.62352	7.20163	7.17256	5.88665	6.03301	5.8617	NM_011756	chr7:29162191-29162132	Zfp36	Mus musculus zinc finger protein 36 (Zfp36), mRNA [NM_011756]	GO:0003676|GO:0003729|GO:0007243|GO:0050728|GO:0006402|GO:0000289|GO:0050779|GO:0005634|GO:0017091|GO:0046872|GO:0000288|GO:0005829|GO:0003677|GO:0005737|GO:0008270|GO:0043488|GO:0045638	NM_011756	Mm.389856	22695	ENSMUST00000051241	TC1587859
A_52_P455494	0.00023372	1.91952	down	11704.6	12637.3	8.30506	7.36431	12571.8	11396.2	11145.8	11992.3	13237.1	12682.6	8.31722	8.17782	8.42013	7.328	7.41628	7.34864	NM_010749	chr6:122267352-122267411	M6pr	Mus musculus mannose-6-phosphate receptor, cation dependent (M6pr), mRNA [NM_010749]	GO:0000323|GO:0006886|GO:0004872|GO:0005515|GO:0005537|GO:0005768|GO:0005770|GO:0006810|GO:0005764|GO:0016020|GO:0015578|GO:0016021|GO:0015761	NM_010749	Mm.249225	17113	ENSMUST00000112610	TC1573382
A_52_P644674	0.000169181	1.67669	down	2860.71	3537.48	6.27317	5.52756	2914.74	2970.69	2696.7	3353.73	3662.71	3595.99	6.20847	6.23814	6.37291	5.48974	5.56267	5.53026	NM_030057	chr12:60145327-60145268	Trappc6b	Mus musculus trafficking protein particle complex 6B (Trappc6b), mRNA [NM_030057]	GO:0016192|GO:0008150|GO:0003674|GO:0005575|GO:0006810|GO:0005783|GO:0005794	NM_030057	Mm.290070	78232	ENSMUST00000021380	TC1667926
A_52_P308507	0.000437926	2.11069	down	249.331	245.982	2.75127	1.67356	264.65	255.491	227.851	208.451	262.861	266.632	2.74726	2.69869	2.80787	1.48175	1.76214	1.77679	NM_173368	chr2:160773219-160773160	Chd6	Mus musculus chromodomain helicase DNA binding protein 6 (Chd6), mRNA [NM_173368]	GO:0004386|GO:0005634	NM_173368	Mm.122738	71389	ENSMUST00000039782	TC1597867
A_52_P403473	0.00151558	3.63514	down	1946.5	1069.74	5.65768	3.79567	2519.12	2082.91	1237.45	1025.27	1221.55	962.387	5.99802	5.72595	5.24908	3.77998	3.97848	3.62856		chr2:130700757-130700533
A_52_P266940	2.05581e-05	2.27706	down	88.4873	80.2398	1.25272	0.0655438	89.8154	98.2818	77.3646	78.9411	83.9537	77.8246	1.18821	1.32041	1.24953	0.0808911	0.115502	0.000238419		chr13:113158835-113158894								TC1657580
A_51_P137336	0.0174611	1.79043	down	15845.1	18698.6	8.74369	7.90339	15415.3	15891.9	16228	13858.8	21682.6	20554.3	8.61139	8.65756	8.96213	7.5367	8.12823	8.04523	NM_009864	chr8:109193812-109193871	Cdh1	Mus musculus cadherin 1 (Cdh1), mRNA [NM_009864]	GO:0007416|GO:0005886|GO:0019903|GO:0060662|GO:0019904|GO:0007156|GO:0051260|GO:0016020|GO:0007155|GO:0008013|GO:0016021|GO:0005913|GO:0045177|GO:0016323|GO:0001829|GO:0005515|GO:0005912|GO:0005911|GO:0005509|GO:0019538|GO:0042153|GO:0043281|GO:0060693|GO:0016337|GO:0030054|GO:0005737	NM_009864	Mm.35605	12550	ENSMUST00000000312	TC1573477
A_52_P841474	0.00058483	1.71231	down	313.129	375.531	3.06713	2.29118	336.405	352.202	250.779	363.998	401.441	361.153	3.09337	3.16182	2.9462	2.28597	2.37302	2.21455	AV264460	chr3:108003955-108004014		AV264460 RIKEN full-length enriched, adult male testis (DH10B) Mus musculus cDNA clone 4930500A11 3'. [AV264460]			Mm.475328
A_51_P516125	0.00268295	1.97485	down	22876.7	24200.3	9.27306	8.29132	23834.3	21970.1	22825.7	20063	26847.5	25690.5	9.24007	9.12481	9.4543	8.07044	8.43648	8.36703	BC013561	chr1:174203426-174203367		Mus musculus cDNA clone IMAGE:3492058, **** WARNING: chimeric clone ****. [BC013561]						TC1644705
A_52_P59335	2.33735e-05	7.40904	down	311.416	87.0401	3.06302	0.173731	319.51	355.034	259.703	84.3062	75.9778	100.836	3.01903	3.17337	2.99665	0.175753	-0.0285149	0.373953	AK029804	chr2:136381618-136387657	Ankrd5	ankyrin repeat domain 5 Gene [Source:MGI Symbol;Acc:MGI:2441685] [ENSMUST00000028726]	GO:0008150|GO:0003674|GO:0005575		Mm.477841	319196	ENSMUST00000028726	TC1587049
A_51_P204730	9.88731e-05	2.49092	down	4368.69	3638.72	6.88457	5.56789	4519.18	4393.26	4193.62	3742.31	3413.93	3759.93	6.84116	6.80263	7.00991	5.6479	5.4612	5.59457	NM_025892	chr16:32108019-32108078	1500031L02Rik	Mus musculus RIKEN cDNA 1500031L02 gene (1500031L02Rik), mRNA [NM_025892]	GO:0008150|GO:0003674|GO:0005575	NM_025892	Mm.22990	66994	ENSMUST00000042869	TC1577514
A_51_P131084	0.00984564	2.19075	down	7535.38	7211.58	7.66509	6.53366	6609.12	7645.08	8351.96	5497.24	8096.36	8041.13	7.38956	7.60187	8.00383	6.20268	6.70704	6.69127	NM_145615	chr9:55330109-55312637	Etfa	Mus musculus electron transferring flavoprotein, alpha polypeptide (Etfa), nuclear gene encoding mitochondrial protein, mRNA [NM_145615]	GO:0009055|GO:0017133|GO:0005739|GO:0022900|GO:0006810|GO:0050660	NM_145615	Mm.290853	110842	ENSMUST00000034866	TC1572845
A_52_P494982	0.000183828	2.29247	down	290.554	263.511	2.97194	1.77503	310.982	294.625	266.055	229.419	288.936	272.177	2.98001	2.90429	3.0315	1.62003	1.89859	1.80648	NM_026191	chr11:86582610-86582551	Dhx40	Mus musculus DEAH (Asp-Glu-Ala-His) box polypeptide 40 (Dhx40), mRNA [NM_026191]	GO:0004386|GO:0003676|GO:0008026|GO:0016787|GO:0008150|GO:0003674|GO:0005524|GO:0000166|GO:0005575	NM_026191	Mm.260627	67487	ENSMUST00000018569	TC1637879
A_51_P429284	0.00209254	1.8452	down	2138.06	2362.82	5.82893	4.94515	2578.33	2205.93	1629.92	2432.01	2430.02	2226.43	6.03154	5.80873	5.64651	5.02612	4.97073	4.8386	NM_172478	chrX:7731837-7731778	Tbc1d25	Mus musculus TBC1 domain family, member 25 (Tbc1d25), transcript variant 1, mRNA [NM_172478]	GO:0005097|GO:0008150|GO:0032313|GO:0005096|GO:0005575|GO:0005622	NM_172478	Mm.122963	209815	ENSMUST00000039892	TC1602322
A_52_P316644	0.0078364	1.81836	down	873.361	996.342	4.55874	3.69611	797.495	866.767	955.822	902.112	992.784	1094.13	4.33865	4.46106	4.87652	3.59535	3.67932	3.81365	NM_009748	chr6:4027238-4027179	Bet1	Mus musculus blocked early in transport 1 homolog (S. cerevisiae) (Bet1), mRNA [NM_009748]	GO:0006888|GO:0016192|GO:0016020|GO:0003674|GO:0015031|GO:0000139|GO:0016021|GO:0006810|GO:0005783|GO:0005794	NM_009748	Mm.286457	12068	ENSMUST00000049166	TC1773881
A_52_P191412	0.00472375	2.86083	down	93.1404	68.4562	1.31536	-0.201076	109.657	95.4109	74.3533	82.8765	47.9675	74.5247	1.47617	1.27764	1.19225	0.151077	-0.692036	-0.0622697	NM_001039094	chr3:156978706-156978765	Negr1	Mus musculus neuronal growth regulator 1 (Negr1), transcript variant 1, mRNA [NM_001039094]	GO:0005515|GO:0016020|GO:0008150|GO:0007155|GO:0003674|GO:0005886|GO:0043025|GO:0030425|GO:0031225	NM_001039094	Mm.317293	320840	ENSMUST00000074015	TC1651127
A_51_P482600	0.000700774	1.89755	down	191.291	208.013	2.36433	1.44019	219.55	178.153	176.169	207.301	202.234	214.503	2.47772	2.17853	2.43674	1.47377	1.38386	1.46294	AK006780	chr13:99087150-99087209		Putative uncharacterized protein [Source:UniProtKB/TrEMBL;Acc:Q9D9L3] [ENSMUST00000062252]			Mm.256021		ENSMUST00000062252	TC1594477
A_51_P155361	0.00297885	1.68531	down	3725.49	4582.45	6.65491	5.9019	3584.96	3757.56	3833.96	4590.41	4516.67	4640.28	6.50706	6.57714	6.88055	5.94259	5.86502	5.89808	NM_013551	chr9:44144582-44144523	Hmbs	Mus musculus hydroxymethylbilane synthase (Hmbs), transcript variant 1, mRNA [NM_013551]	GO:0033014|GO:0005634|GO:0004418|GO:0050662|GO:0031406|GO:0016740|GO:0006779|GO:0005737|GO:0043176|GO:0006783|GO:0000793	NM_013551	Mm.247676	15288	ENSMUST00000077353	TC1572555
A_51_P201520	0.000916733	1.96416	down	2120.12	2237.02	5.84082	4.8669	2218.99	1996.92	2144.46	2157.46	2306.35	2247.24	5.815	5.66512	6.04233	4.8533	4.89538	4.85202	NM_001037846	chr10:115922487-115922428	Cnot2	Mus musculus CCR4-NOT transcription complex, subunit 2 (Cnot2), transcript variant 1, mRNA [NM_001037846]	GO:0030528|GO:0005634|GO:0008150|GO:0006350|GO:0003674|GO:0005737|GO:0005575|GO:0045449	NM_001037846	Mm.351553	72068	ENSMUST00000064218	TC1573559
A_51_P473438	0.00376801	2.24107	down	65.4873	61.34	0.824415	-0.339771	65.3098	68.5553	62.5968	73.2668	61.3811	49.3722	0.728545	0.800755	0.943944	-0.0267272	-0.336298	-0.656289	AK080901	chr5:152171082-152171023	D730045B01Rik	Mus musculus 4 days neonate male adipose cDNA, RIKEN full-length enriched library, clone:B430203H04 product:hypothetical protein, full insert sequence. [AK080901]	GO:0008150|GO:0003674|GO:0005575		Mm.160009	77867		TC1601161
A_51_P261001	0.000155599	3.11059	down	2048.28	1364.24	5.79083	4.15364	2136.66	1914.02	2094.17	1326.5	1369.43	1396.8	5.76046	5.60395	6.00809	4.1516	4.14334	4.16599	NM_013827	chr5:108537924-108537983	Mtf2	Mus musculus metal response element binding transcription factor 2 (Mtf2), mRNA [NM_013827]	GO:0003676|GO:0005634|GO:0005515|GO:0046872|GO:0003677|GO:0008270	NM_013827	Mm.257149	17765	ENSMUST00000081567	TC1572215
A_52_P572808	0.00481066	1.77043	down	1056.68	1234.06	4.83213	4.00803	1153.63	935.446	1080.98	1205.57	1189.96	1306.65	4.87128	4.57107	5.05404	4.01368	3.94067	4.06974	NM_172715	chr5:101327972-101328031	Agpat9	Mus musculus 1-acylglycerol-3-phosphate O-acyltransferase 9 (Agpat9), transcript variant 1, mRNA [NM_172715]	GO:0019432|GO:0004366|GO:0016020|GO:0008415|GO:0008152|GO:0016740|GO:0016021|GO:0005783|GO:0008654	NM_172715	Mm.271911	231510	ENSMUST00000112887	TC1579401
A_51_P101975	0.00391188	2.06336	down	29.0763	29.2144	-0.349097	-1.3941	26.9397	28.6798	31.6094	30.819	30.1092	26.7151	-0.549021	-0.456479	-0.0417929	-1.27607	-1.36389	-1.54233	NM_010205	chr19:45811423-45811364	Fgf8	Mus musculus fibroblast growth factor 8 (Fgf8), transcript variant 1, mRNA [NM_010205]	GO:0042472|GO:0043524|GO:0042056|GO:0043066|GO:0030324|GO:0001569|GO:0008083|GO:0035116|GO:0001839|GO:0021884|GO:0003007|GO:0009792|GO:0030539|GO:0001759|GO:0021846|GO:0007368|GO:0000165|GO:0090134|GO:0001658|GO:0048699|GO:0021544|GO:0021537|GO:0008284|GO:0045165|GO:0010628|GO:0005576|GO:0008078|GO:0008543|GO:0008045|GO:0051781|GO:0035050|GO:0001947|GO:0007507|GO:0035108|GO:0033563|GO:0060425|GO:…	NM_010205	Mm.4012	14179	ENSMUST00000026241	NP520634
A_51_P516012	0.00259673	2.87573	down	179.875	125.054	2.22451	0.700581	241.823	178.334	119.468	111.296	124.906	138.96	2.61712	2.18	1.87641	0.576449	0.688679	0.836614	NM_008745	chr13:59033682-59033741	Ntrk2	Mus musculus neurotrophic tyrosine kinase, receptor, type 2 (Ntrk2), transcript variant 2, mRNA [NM_008745]	GO:0004672|GO:0007399|GO:0004713|GO:0005886|GO:0005524|GO:0030154|GO:0043025|GO:0030425|GO:0000166|GO:0030426|GO:0046777|GO:0016020|GO:0005829|GO:0046548|GO:0005030|GO:0014069|GO:0006468|GO:0007631|GO:0016301|GO:0043679|GO:0016021|GO:0014047|GO:0005515|GO:0004872|GO:0051968|GO:0048403|GO:0001570|GO:0007275|GO:0016740|GO:0009986|GO:0046928|GO:0019222|GO:0043197|GO:0030424|GO:0050773|GO:0005887|GO:…	NM_008745	Mm.130054	18212		TC1575671
A_52_P676623	0.0623819	1.75159	down	297.1	349.446	2.98077	2.17211	244.786	267.898	378.616	276.952	387.476	383.909	2.63469	2.7671	3.54052	1.89168	2.32194	2.30271	NM_028319	chr19:40991517-40991576	Zfp518	Mus musculus zinc finger protein 518 (Zfp518), mRNA [NM_028319]	GO:0005634|GO:0046872|GO:0008150|GO:0006350|GO:0003674|GO:0003677|GO:0008270|GO:0005575|GO:0045449|GO:0005622	NM_028319	Mm.313523	72672		TC1737932
A_52_P574697	0.00108273	1.7727	down	5974.46	7014.16	7.33594	6.51	6222.58	5997.66	5703.14	6140.67	7630.53	7271.28	7.30261	7.25174	7.45347	6.36237	6.62155	6.54608	NM_011317	chr4:129392221-129392162	Khdrbs1	Mus musculus KH domain containing, RNA binding, signal transduction associated 1 (Khdrbs1), mRNA [NM_011317]	GO:0005515|GO:0005070|GO:0006350|GO:0046831|GO:0017124|GO:0003723|GO:0007049|GO:0045449|GO:0005634|GO:0016020|GO:0007166|GO:0016481|GO:0005737|GO:0016564	NM_011317	Mm.8256	20218	ENSMUST00000066257	TC1600806
A_51_P408131	0.000756094	3.53421	down	50.8705	30.1196	0.45863	-1.36276	47.1833	51.1015	54.3267	24.1757	33.8616	32.3215	0.259522	0.376852	0.739515	-1.62633	-1.19444	-1.26749	AK042550	chr7:59105851-59105792	Fancf	Mus musculus 7 days neonate cerebellum cDNA, RIKEN full-length enriched library, clone:A730004C17 product:unclassifiable, full insert sequence. [AK042550]	GO:0008150|GO:0003674|GO:0005575		Mm.210091	100040608		TC1607333
A_52_P283156	0.0139032	4.56285	down	163.86	74.8957	2.08132	-0.108617	100.002	186.816	204.761	101.861	45.7133	77.1132	1.34321	2.24703	2.65372	0.448638	-0.761478	-0.0130095		chr15:57856702-57856643
A_52_P245415	0.00426566	1.89666	down	153.815	169.756	2.05248	1.12902	170.626	150.823	139.995	133.112	186.896	189.261	2.11401	1.93827	2.10515	0.834681	1.27007	1.28232	NM_001033532	chr18:25625678-25625737	AW554918	Mus musculus expressed sequence AW554918 (AW554918), mRNA [NM_001033532]	GO:0008150|GO:0003674|GO:0005575	NM_001033532	Mm.391081	225289	ENSMUST00000036619	TC1628136
A_52_P576100	0.0172767	1.54695	down	3204.29	4182.38	6.39945	5.77002	4034.56	3293.11	2285.21	4261.16	4182.25	4103.73	6.67751	6.38679	6.13404	5.83522	5.75404	5.7208	NM_011363	chr7:133610772-133610713	Sh2b1	Mus musculus SH2B adaptor protein 1 (Sh2b1), transcript variant 2, mRNA [NM_011363]	GO:0005634|GO:0005515|GO:0016020|GO:0001726|GO:0030032|GO:0006928|GO:0005737|GO:0004871	NM_011363	Mm.8538	20399	ENSMUST00000098049	NP383732
A_51_P169374	0.000304617	2.5084	down	4591.28	3790.76	6.95397	5.62721	4995.5	4288.79	4489.54	3897.19	3896.08	3579.01	6.98573	6.76791	7.10828	5.7064	5.65179	5.52343	NM_027172	chr2:151834611-151834670	2310046K01Rik	Mus musculus RIKEN cDNA 2310046K01 gene (2310046K01Rik), transcript variant 1, mRNA [NM_027172]	GO:0034605|GO:0005515|GO:0016020|GO:0016021|GO:0005575	NM_027172	Mm.258262	69698	ENSMUST00000109861	NP404185
A_51_P293729	0.0141156	1.75898	down	10921.3	12821.1	8.19895	7.38421	10948.9	9491.02	12324.2	11855.7	13288.4	13319	8.11781	7.9139	8.56513	7.31148	7.42186	7.41929	NM_054102	chr1:153210877-153210935	Ivns1abp	Mus musculus influenza virus NS1A binding protein (Ivns1abp), transcript variant 2, mRNA [NM_054102]	GO:0005634|GO:0005515|GO:0008150|GO:0003674|GO:0005856|GO:0005737|GO:0005575	NM_054102	Mm.33764	117198	ENSMUST00000023918	TC1573979
A_52_P463687	0.0142869	1.61472	down	211.771	264.154	2.47654	1.78525	227.899	261.29	146.124	264.227	267.227	261.009	2.53157	2.73106	2.16698	1.82382	1.7859	1.74604	AK133434	chr7:28982212-28982271	AI426330	Mus musculus adult male testis cDNA, RIKEN full-length enriched library, clone:4933430M05 product:unclassifiable, full insert sequence. [AK133434]			Mm.33776	101563		TC1641601
A_51_P476481	0.0160551	2.60977	down	288.693	241.508	2.96428	1.58035	271.732	301.733	292.615	142.001	282.511	300.013	2.78536	2.93869	3.16879	0.927945	1.86614	1.94697	NM_145548	chr4:95723288-95712305	Cyp2j13	Mus musculus cytochrome P450, family 2, subfamily j, polypeptide 13 (Cyp2j13), mRNA [NM_145548]	GO:0046872|GO:0008150|GO:0003674|GO:0016491|GO:0004497|GO:0005575|GO:0055114	NM_145548	Mm.268175	230459	ENSMUST00000030305
A_51_P398235	0.000468313	1.76	down	315.692	369.468	3.08093	2.26535	343.756	346.901	256.42	333.156	376.096	399.154	3.12456	3.13994	2.97829	2.15824	2.27894	2.35888	NM_172704	chr4:151355874-151355933	Dnajc11	Mus musculus DnaJ (Hsp40) homolog, subfamily C, member 11 (Dnajc11), mRNA [NM_172704]	GO:0008150|GO:0003674|GO:0005739|GO:0005743|GO:0031072	NM_172704	Mm.21353	230935	ENSMUST00000062904	TC1572493
A_51_P215995	0.000244533	3.33748	down	1275.71	794.935	5.10854	3.36978	1270.88	1225.72	1330.54	703.631	847.064	834.111	5.01093	4.96097	5.35372	3.23686	3.45031	3.42218	NM_145456	chr13:108514954-108514895	Zswim6	Mus musculus zinc finger, SWIM domain containing 6 (Zswim6), mRNA [NM_145456]	GO:0046872|GO:0008150|GO:0003674|GO:0008270|GO:0005575	NM_145456	Mm.433838	67263		TC1681797
A_51_P161574	0.000170991	2.72033	down	6442.6	4918.62	7.44435	6.00057	6159.48	6823.45	6344.88	4444.42	5089.08	5222.38	7.28791	7.43784	7.6073	5.89596	6.03717	6.06857	NM_025794	chr3:79407874-79407815	Etfdh	Mus musculus electron transferring flavoprotein, dehydrogenase (Etfdh), mRNA [NM_025794]	GO:0051536|GO:0005739|GO:0016491|GO:0005743|GO:0006810|GO:0006979|GO:0016020|GO:0017133|GO:0046872|GO:0051539|GO:0004174|GO:0031966|GO:0016021|GO:0022900|GO:0055114	NM_025794	Mm.28336	66841	ENSMUST00000120992	TC1595359
A_52_P522264	0.0147255	2.85269	down	1561.12	1093.38	5.34546	3.83314	1203.75	1282.77	2196.84	1023.23	1127.09	1129.81	4.93264	5.0266	6.07714	3.7771	3.86237	3.85995	NM_001018042	chr2:72776235-72776176	Sp3	Mus musculus trans-acting transcription factor 3 (Sp3), transcript variant 1, mRNA [NM_001018042]	GO:0060136|GO:0001889|GO:0006350|GO:0001503|GO:0030851|GO:0030217|GO:0030324|GO:0030224|GO:0045449|GO:0001892|GO:0005634|GO:0046872|GO:0003677|GO:0008270|GO:0060216|GO:0005622|GO:0001829|GO:0001779|GO:0003676|GO:0003700|GO:0001701|GO:0048596|GO:0043353|GO:0003690|GO:0006355|GO:0030218|GO:0030219|GO:0003682|GO:0030183|GO:0048706	NM_001018042	Mm.124328	20687	ENSMUST00000066003	TC1575400
A_51_P128648	0.00133627	2.31804	down	47861.3	42742.7	10.3362	9.12333	44467.6	47612.2	51504	43224.5	43105.7	41898	10.1398	10.2406	10.6283	9.17775	9.11957	9.07268	NM_025899	chr7:127802599-127802658	Uqcrc2	Mus musculus ubiquinol cytochrome c reductase core protein 2 (Uqcrc2), mRNA [NM_025899]	GO:0008150|GO:0070469|GO:0004222|GO:0005739|GO:0003824|GO:0005743|GO:0006810|GO:0006508|GO:0016020|GO:0046872|GO:0005750|GO:0008270|GO:0022900|GO:0032403	NM_025899	Mm.334206	67003	ENSMUST00000033176	TC1573111
A_51_P430766	6.60584e-05	3.65015	down	58.2344	32.871	0.646699	-1.22126	53.5678	67.8404	53.2949	33.2628	32.9518	32.3985	0.442613	0.785632	0.711853	-1.16598	-1.23374	-1.26406	NM_010548	chr1:132920943-132921002	Il10	Mus musculus interleukin 10 (Il10), mRNA [NM_010548]	GO:0010468|GO:0001818|GO:0005576|GO:0006955|GO:0005125|GO:0005615|GO:0044130|GO:0043066|GO:0050728|GO:0032695|GO:0030889|GO:0030886|GO:0045348|GO:0002904|GO:0060670|GO:0042742|GO:0042536|GO:0032689|GO:0051930|GO:0045019|GO:0002875|GO:0005141|GO:0032720	NM_010548	Mm.874	16153	ENSMUST00000016673	TC1591387
A_51_P222773	2.92712e-05	2.50778	down	3714.45	3051.92	6.64178	5.31537	4214.19	3744.18	3184.98	3124.87	3030.71	3000.19	6.74036	6.57199	6.61299	5.38777	5.28942	5.26892	NM_010446	chr2:147868757-147868698	Foxa2	Mus musculus forkhead box A2 (Foxa2), mRNA [NM_010446]	GO:0006350|GO:0048754|GO:0001705|GO:0009953|GO:0045666|GO:0030324|GO:0045449|GO:0005634|GO:0016568|GO:0003677|GO:0048646|GO:0010468|GO:0021904|GO:0007389|GO:0031018|GO:0005515|GO:0003700|GO:0048468|GO:0044464|GO:0007275|GO:0001701|GO:0030855|GO:0003705|GO:0045944|GO:0006355|GO:0003690|GO:0048665|GO:0010552|GO:0043565|GO:0016563|GO:0045665|GO:0005737|GO:0021533|GO:0009653|GO:0009952	NM_010446	Mm.938	15376	ENSMUST00000109963	TC1584073
A_51_P183102	0.00177386	2.51321	down	1599.96	1333.38	5.43447	4.10494	1668.94	1495.85	1635.08	1063.69	1463.31	1473.16	5.40404	5.24831	5.65107	3.83304	4.239	4.24278	NM_175226	chr15:58731710-58731769	Rnf139	Mus musculus ring finger protein 139 (Rnf139), mRNA [NM_175226]	GO:0005515|GO:0004872|GO:0046872|GO:0016020|GO:0008150|GO:0003674|GO:0008270|GO:0016021|GO:0005575|GO:0005783|GO:0016874	NM_175226	Mm.4537	75841	ENSMUST00000036904	TC1576740
A_52_P137829	0.0202531	1.78607	down	108.334	127.57	1.54833	0.711545	98.2972	111.928	114.777	103.183	159.261	120.265	1.3184	1.50798	1.81862	0.467242	1.03923	0.628162	AK129472	chr8:113660498-113660557	4930402E16Rik	RIKEN cDNA 4930402E16 gene Gene [Source:MGI Symbol;Acc:MGI:2442188] [ENSMUST00000039333]	GO:0008150|GO:0003674|GO:0005737|GO:0005739|GO:0004047|GO:0016491|GO:0006546		Mm.370024	319518	ENSMUST00000039333	TC1597132
A_51_P146126	0.0323561	1.57397	down	1672.23	2190.71	5.4903	4.83589	1437.26	1674.05	1905.38	2080.41	2177.51	2314.21	5.18843	5.41068	5.87179	4.80084	4.81244	4.89439	NM_009875	chr6:134875215-134875274	Cdkn1b	Mus musculus cyclin-dependent kinase inhibitor 1B (Cdkn1b), mRNA [NM_009875]	GO:0004861|GO:0031116|GO:0005515|GO:0050680|GO:0008219|GO:0043066|GO:0007605|GO:0060770|GO:0048839|GO:0007049|GO:0051271|GO:0005634|GO:0005829|GO:0004860|GO:0005737|GO:0045736|GO:0007050|GO:0032403|GO:0006813|GO:0008284|GO:0008285	NM_009875	Mm.2958	12576	ENSMUST00000067327
A_51_P408631	0.00057986	3.96406	down	17911	9316.08	8.91239	6.92541	15703.1	17591.9	20438.1	9521.43	9254.73	9172.09	8.63808	8.80418	9.2949	6.99515	6.89995	6.88112	NM_015747	chr2:129037130-129037189	Slc20a1	Mus musculus solute carrier family 20, member 1 (Slc20a1), transcript variant 1, mRNA [NM_015747]	GO:0015293|GO:0004872|GO:0005316|GO:0016020|GO:0006817|GO:0005315|GO:0006814|GO:0016021|GO:0006810	NM_015747	Mm.401622	20515	ENSMUST00000110315	TC1572412
A_52_P237792	0.0619439	1.73243	down	105.845	118.429	1.41962	0.626823	136.958	123.406	57.1704	115.013	125.154	115.121	1.7969	1.64882	0.813124	0.623838	0.691542	0.565091	NM_031196	chr10:76501259-76501318	Slc19a1	Mus musculus solute carrier family 19 (sodium/hydrogen exchanger), member 1 (Slc19a1), mRNA [NM_031196]	GO:0016020|GO:0008518|GO:0005886|GO:0005542|GO:0015884|GO:0015350|GO:0016021|GO:0006810|GO:0016323	NM_031196	Mm.265060	20509	ENSMUST00000133059	TC1642137
A_51_P390531	0.000809769	2.20383	down	826.862	779.532	4.48295	3.34294	787.825	846.918	845.843	704.156	829.593	804.845	4.32105	4.42764	4.70017	3.23794	3.42024	3.37065	NM_172663	chr2:49406440-49406499	Epc2	Mus musculus enhancer of polycomb homolog 2 (Drosophila) (Epc2), mRNA [NM_172663]	GO:0006974|GO:0005634|GO:0008150|GO:0006350|GO:0003674|GO:0016568|GO:0005575|GO:0006281|GO:0045449	NM_172663	Mm.29167	227867	ENSMUST00000102770	TC1578493
A_52_P532384	0.0127328	3.16661	down	434.873	302.539	3.55469	1.89175	413.444	423.928	467.247	168.302	370.133	369.181	3.39086	3.42923	3.84397	1.1731	2.25588	2.24627		chr1:161139751-161139692
A_52_P376016	0.00121622	2.1957	down	66.5103	63.12	0.847307	-0.287372	67.8323	64.1379	67.5608	56.9671	60.2261	72.1667	0.783219	0.704663	1.05404	-0.389758	-0.363703	-0.108655	AK032619	chr15:39515546-39515605	Rims2	Mus musculus adult male olfactory brain cDNA, RIKEN full-length enriched library, clone:6430709C16 product:Rab3 interacting protein 1, full insert sequence. [AK032619]	GO:0006886|GO:0005515|GO:0046982|GO:0043234|GO:0019904|GO:0006810|GO:0017156|GO:0017137|GO:0046872|GO:0030054|GO:0019933|GO:0030073|GO:0006836|GO:0045202|GO:0006887|GO:0008270|GO:0019717		Mm.309296	116838		TC1606658
A_52_P184362	0.000711235	2.80417	down	56.3934	41.3775	0.594769	-0.892807	49.4782	68.1235	51.5786	41.2247	45.0627	37.845	0.328038	0.791639	0.664628	-0.856378	-0.782158	-1.03988	NM_178257	chr4:135306490-135306549	Il22ra1	Mus musculus interleukin 22 receptor, alpha 1 (Il22ra1), mRNA [NM_178257]	GO:0007596|GO:0004872|GO:0016020|GO:0008150|GO:0003674|GO:0016021|GO:0005575	NM_178257	Mm.261647	230828	ENSMUST00000102546	TC1628338
A_51_P150648	0.000967841	2.48442	down	14975.4	12545.3	8.65166	7.33875	17273.9	14875.7	12776.5	9999.75	13991.4	13644.8	8.77562	8.56223	8.61713	7.06586	7.49624	7.45415	NM_010684	chr8:13175136-13175195	Lamp1	Mus musculus lysosomal-associated membrane protein 1 (Lamp1), mRNA [NM_010684]	GO:0005764|GO:0042470|GO:0016020|GO:0042383|GO:0005886|GO:0005771|GO:0005768|GO:0009897|GO:0016021|GO:0005770	NM_010684	Mm.16716	16783	ENSMUST00000110847	TC1655738
A_52_P635271	0.0354901	1.51298	down	1409.81	1868.11	5.20418	4.60679	1591.37	1707.4	930.668	1934.44	1797	1872.89	5.33537	5.43914	4.83805	4.69588	4.53536	4.58914	NM_201646	chr12:114216873-114216932	Btbd6	Mus musculus BTB (POZ) domain containing 6 (Btbd6), transcript variant 1, mRNA [NM_201646]	GO:0005515|GO:0008150|GO:0003674|GO:0005737|GO:0005575	NM_201646	Mm.440140	399566	ENSMUST00000002880	TC1580733
A_51_P483877	0.00215461	2.70105	down	82.1701	60.8969	1.09981	-0.333709	86.2375	105.821	54.4518	58.2628	65.5725	58.8554	1.12956	1.42704	0.742834	-0.35731	-0.241002	-0.402814	NM_007776	chr1:65108661-65108602	Crygd	Mus musculus crystallin, gamma D (Crygd), mRNA [NM_007776]	GO:0005634|GO:0001654|GO:0005737|GO:0070306|GO:0002088|GO:0005212	NM_007776	Mm.425031	12967	ENSMUST00000045028	TC1773476
A_52_P595140	0.00413993	2.44434	down	698.709	570.545	4.1829	2.89345	873.986	776.607	445.534	563.942	530.287	617.406	4.47078	4.3026	3.77532	2.91759	2.77461	2.98816	NM_198030	chr5:104401590-104399858	Hsd17b13	Mus musculus hydroxysteroid (17-beta) dehydrogenase 13 (Hsd17b13), transcript variant 2, mRNA [NM_198030]	GO:0005576|GO:0008150|GO:0003674|GO:0008152|GO:0005488|GO:0016491|GO:0005575|GO:0003824|GO:0055114	NM_198030	Mm.284944	243168	ENSMUST00000112803	TC1666811
A_51_P316129	0.00019114	3.50484	down	1468.15	868.199	5.31068	3.50133	1445.75	1402.82	1555.89	850.348	849.317	904.932	5.19691	5.15567	5.57945	3.5101	3.45414	3.53975	NM_174875	chrX:137598365-137598424	Atg4a	Mus musculus autophagy-related 4A (yeast) (Atg4a), mRNA [NM_174875]	GO:0016787|GO:0006914|GO:0008150|GO:0015031|GO:0005737|GO:0008233|GO:0005575|GO:0008234|GO:0006810	NM_174875	Mm.393320	666468	ENSMUST00000112971	TC1580601
A_51_P508959	0.00335268	3.44053	down	3534.97	2115.96	6.56007	4.77744	3306.9	2946.89	4351.14	2174.41	2378.03	1795.44	6.39058	6.22654	7.0631	4.86459	4.93953	4.5282	NM_030024	chr6:54280124-54280183	Prr15	Mus musculus proline rich 15 (Prr15), mRNA [NM_030024]	GO:0008150|GO:0003674|GO:0007275|GO:0005575	NM_030024	Mm.41984	78004	ENSMUST00000059138	TC1656104
A_51_P134801	0.00124448	1.79759	down	686.679	791.175	4.20696	3.3609	759.372	715.696	584.971	763.35	899.004	711.172	4.26798	4.18476	4.16815	3.35439	3.53616	3.19214	NM_001025572	chr17:66336089-66336030	Ankrd12	Mus musculus ankyrin repeat domain 12 (Ankrd12), mRNA [NM_001025572]	GO:0008150|GO:0003674|GO:0005575	NM_001025572	Mm.34706	106585	ENSMUST00000038116	TC1658175
A_52_P956125	0.0102758	1.64131	down	28.1335	35.4391	-0.397971	-1.11282	29.2411	25.0992	30.0604	35.0937	36.2267	34.997	-0.430759	-0.648871	-0.114283	-1.08867	-1.09704	-1.15276	AK086311	chr17:66315823-66315764	Ankrd12	Mus musculus 15 days embryo head cDNA, RIKEN full-length enriched library, clone:D930020E11 product:unclassifiable, full insert sequence. [AK086311]	GO:0008150|GO:0003674|GO:0005575		Mm.441953	106585		TC1597471
A_51_P165435	0.00045716	2.09124	down	107436	106590	11.5053	10.441	107247	108558	106502	111690	104104	103976	11.4099	11.4297	11.6764	10.5473	10.3916	10.384	NM_009941	chr8:123197924-123197983	Cox4i1	Mus musculus cytochrome c oxidase subunit IV isoform 1 (Cox4i1), nuclear gene encoding mitochondrial protein, mRNA [NM_009941]	GO:0005515|GO:0016020|GO:0005739|GO:0005743|GO:0004129	NM_009941	Mm.386758	12857	ENSMUST00000034276	NP747280
A_51_P500550	0.000174673	1.85188	down	799.572	889.379	4.42298	3.53399	898.065	841.123	659.528	813.518	918.805	935.815	4.50999	4.41773	4.34122	3.44622	3.56759	3.58816	NM_025813	chr3:67407321-67407380	Mfsd1	Mus musculus major facilitator sdownerfamily domain containing 1 (Mfsd1), mRNA [NM_025813]	GO:0016020|GO:0008150|GO:0003674|GO:0055085|GO:0016021|GO:0005575|GO:0006810	NM_025813	Mm.479192	66868		TC1571921
A_51_P300936	0.00259234	1.87504	down	2943.51	3251.29	6.31336	5.40644	3052.45	2715.59	3062.49	3274.16	3335.56	3144.15	6.27507	6.10861	6.55642	5.4551	5.42769	5.33654	NM_001081223	chr18:11901214-11901273	Rbbp8	Mus musculus retinoblastoma binding protein 8 (Rbbp8), mRNA [NM_001081223]	GO:0001835|GO:0000082	NM_001081223	Mm.154275	225182	ENSMUST00000047322	TC1578868
A_52_P536383	0.0487978	2.84724	down	243.621	170.727	2.56622	1.05665	372.244	242.431	116.188	117.766	130.159	264.258	3.23942	2.62299	1.83624	0.657959	0.748115	1.76388	NM_028487	chr13:112280026-112279967	Gpbp1	Mus musculus GC-rich promoter binding protein 1 (Gpbp1), transcript variant 2, mRNA [NM_028487]	GO:0005634|GO:0005515|GO:0003700|GO:0006350|GO:0003677|GO:0045893|GO:0045449	NM_028487	Mm.57286	73274	ENSMUST00000091236	TC1618682
A_51_P465473	0.0240933	1.82417	down	419.132	454.424	3.43427	2.56703	535.838	466.523	255.033	476.992	448.558	437.721	3.76497	3.56736	2.97047	2.67601	2.53313	2.49195	NM_027453	chr4:108487606-108487547	Btf3l4	Mus musculus basic transcription factor 3-like 4 (Btf3l4), mRNA [NM_027453]	GO:0008150|GO:0003674|GO:0005575	NM_027453	Mm.379178	70533	ENSMUST00000102742	TC1572488
A_51_P465582	0.00231777	1.74025	down	4675.62	5579.44	6.9819	6.1826	4959.17	4557.59	4510.1	6110.93	5423.57	5203.81	6.9752	6.85561	7.11487	6.35536	6.12901	6.06344	NM_024257	chr4:62160215-62160156	Hdhd3	Mus musculus haloacid dehalogenase-like hydrolase domain containing 3 (Hdhd3), mRNA [NM_024257]	GO:0016787|GO:0008150|GO:0003674|GO:0008152|GO:0005739|GO:0003824|GO:0008967	NM_024257	Mm.41506	72748	ENSMUST00000037820	TC1580923
A_51_P339858	0.00260056	2.0815	down	585.522	587.811	3.98061	2.92299	656.681	557.86	542.025	472.313	678.246	612.874	4.05837	3.82532	4.05814	2.66178	3.12964	2.97753	NM_008602	chr18:77392149-77392208	Pias2	Mus musculus protein inhibitor of activated STAT 2 (Pias2), transcript variant 1, mRNA [NM_008602]	GO:0045667|GO:0003676|GO:0019789|GO:0005515|GO:0006350|GO:0016604|GO:0030521|GO:0050681|GO:0045449|GO:0035259|GO:0030331|GO:0010552|GO:0003702|GO:0005634|GO:0016563|GO:0060765|GO:0046872|GO:0003677|GO:0045941|GO:0008270|GO:0016925|GO:0050775|GO:0006351	NM_008602	Mm.6370	17344	ENSMUST00000114777	TC1593217
A_51_P116699	0.0190889	1.7046	down	651.313	762.934	4.08465	3.31522	807.89	725.378	420.673	759.437	746.648	782.717	4.35733	4.20415	3.69248	3.34697	3.26826	3.33043	NM_025905	chr7:74871149-74871208	Ttc23	Mus musculus tetratricopeptide repeat domain 23 (Ttc23), transcript variant 1, mRNA [NM_025905]	GO:0008150|GO:0003674|GO:0005488|GO:0005575	NM_025905	Mm.249356	67009	ENSMUST00000072071	TC1580662
A_52_P394395	0.000731854	2.76766	down	21078.9	15771.7	9.15324	7.68457	20732	19738.7	22766.2	16375.3	15611.1	15328.7	9.03889	8.97029	9.45053	7.77742	7.65426	7.62203	NM_008991	chr3:121461951-121461892	Abcd3	Mus musculus ATP-binding cassette, sub-family D (ALD), member 3 (Abcd3), mRNA [NM_008991]	GO:0005777|GO:0005515|GO:0005524|GO:0005778|GO:0055085|GO:0005739|GO:0016887|GO:0000166|GO:0043621|GO:0005743|GO:0006810|GO:0016020|GO:0042626|GO:0017111|GO:0016021	NM_008991	Mm.399042	19299	ENSMUST00000029770	TC1572115
A_51_P246773	0.0115622	1.63236	down	256.186	325.962	2.7907	2.08374	258.507	236.347	273.705	289.563	351.513	336.812	2.71338	2.58632	3.0724	1.95592	2.18141	2.11388	NM_030261	chr9:14130452-14130511	Sesn3	Mus musculus sestrin 3 (Sesn3), mRNA [NM_030261]	GO:0005634|GO:0008150|GO:0003674|GO:0007050|GO:0005575	NM_030261	Mm.439776	75747	ENSMUST00000034507	TC1582425
A_52_P188070	0.000311114	4.72566	down	253.958	109.584	2.74326	0.502745	307.429	275.648	178.798	89.6835	115.881	123.188	2.96343	2.80824	2.45811	0.264956	0.580479	0.6628	AK019056	chr13:067622118-067622059	Zfp87	Mus musculus adult male stomach cDNA, RIKEN full-length enriched library, clone:2210039O17 product:weakly similar to KRUEPPEL-TYPE ZINC FINGER PROTEIN (FRAGMENT) [Homo sapiens], full insert sequence. [AK019056]	GO:0046872|GO:0008150|GO:0003674|GO:0005575		Mm.441857	170763		TC1588241
A_52_P542912	0.00432252	1.97756	down	5782.82	6042.2	7.28418	6.30046	5978.95	5093.39	6276.12	5905.64	6262.64	5958.31	7.24499	7.01597	7.59158	6.30606	6.33653	6.25877	NM_144846	chr15:63762826-63762767	Fam49b	Mus musculus family with sequence similarity 49, member B (Fam49b), mRNA [NM_144846]	GO:0008150|GO:0003674|GO:0005575	NM_144846	Mm.246108	223601	ENSMUST00000063838	TC1575559
A_51_P333216	0.070134	1.72437	down	51.1153	61.7357	0.424516	-0.361554	49.8448	66.921	36.5802	57.2997	83.6177	44.2897	0.338687	0.765945	0.168916	-0.381359	0.109716	-0.813018	NM_008121	chr3:96854968-96855027	Gja5	Mus musculus gap junction protein, alpha 5 (Gja5), mRNA [NM_008121]	GO:0005886|GO:0035050|GO:0007154|GO:0001501|GO:0016020|GO:0005922|GO:0030054|GO:0001568|GO:0030326|GO:0007267|GO:0005921|GO:0016021|GO:0005243	NM_008121	Mm.281816	14613	ENSMUST00000107064	TC1591211
A_51_P508191	2.71006e-05	1.7778	down	3694.29	4291.4	6.63729	5.8072	4079.61	3741.44	3261.82	4243.58	4261.56	4369.05	6.69353	6.57094	6.64739	5.82925	5.78115	5.81119	NM_007834	chr16:94719593-94719534	Dscr3	Mus musculus up syndrome critical region gene 3 (Dscr3), mRNA [NM_007834]	GO:0007034|GO:0030904	NM_007834	Mm.7472	13185	ENSMUST00000023615	TC1574712
A_51_P141860	0.00341905	1.50288	down	6746.02	9321.77	7.50648	6.91876	7386.56	6883.3	5968.21	8121.06	10463.5	9380.76	7.55	7.45044	7.51901	6.76564	7.07706	6.91357	NM_134015	chr11:32646601-32646660	Fbxw11	Mus musculus F-box and WD-40 domain protein 11 (Fbxw11), mRNA [NM_134015]	GO:0008150|GO:0003674|GO:0005575	NM_134015	Mm.28017	103583	ENSMUST00000076383	TC1572401
A_52_P121641	0.0062043	1.5689	down	1857.81	2458.63	5.65089	5.00113	1889.3	1773.56	1910.57	2257.55	2597.01	2521.32	5.58295	5.49399	5.87572	4.91873	5.06662	5.01804	NM_138589	chr7:129225487-129225546	Ubfd1	Mus musculus ubiquitin family domain containing 1 (Ubfd1), mRNA [NM_138589]	GO:0008150|GO:0003674|GO:0005575	NM_138589	Mm.282122	28018	ENSMUST00000115985	TC1581111
A_51_P192654	4.49225e-06	2.90086	down	1287.32	918.493	5.11692	3.58044	1360.64	1369.38	1131.94	839.842	966.53	949.107	5.10939	5.12087	5.12051	3.49216	3.64065	3.60851	NM_026536	chr12:70845520-70845579	Atp5s	Mus musculus ATP synthase, H+ transporting, mitochondrial F0 complex, subunit s (Atp5s), nuclear gene encoding mitochondrial protein, mRNA [NM_026536]	GO:0006754|GO:0016020|GO:0006811|GO:0005739|GO:0045263|GO:0015992|GO:0006810|GO:0005743	NM_026536	Mm.27844	68055		TC1580514
A_51_P515002	0.000770844	2.5843	down	57.4224	45.8816	0.625381	-0.744391	67.1782	50.8429	54.246	44.7217	42.1886	50.7344	0.769239	0.369532	0.737372	-0.73891	-0.877238	-0.617025	AK048403	chr2:154696662-154696721	C130057N11Rik	Mus musculus 16 days embryo head cDNA, RIKEN full-length enriched library, clone:C130057N11 product:unclassifiable, full insert sequence. [AK048403]	GO:0008150|GO:0003674|GO:0005575		Mm.221440	99061
A_51_P283759	0.0739348	3.08611	down	111.337	88.7234	1.58441	-0.0413823	102.846	104.438	126.726	29.5058	120.977	115.688	1.38367	1.40806	1.96149	-1.33889	0.642565	0.572174	M57999	chr3:135247771-135247710	Nfkb1	Mouse transcription factor NF-kappa-B DNA binding subunit mRNA, complete cds. [M57999]	GO:0001818|GO:0006350|GO:0016566|GO:0031072|GO:0045449|GO:0045892|GO:0005634|GO:0006916|GO:0005829|GO:0003677|GO:0045083|GO:0005515|GO:0003700|GO:0043234|GO:0045944|GO:0046983|GO:0006355|GO:0003690|GO:0007165|GO:0042803|GO:0010552|GO:0006979|GO:0016563|GO:0043565|GO:0048535|GO:0005737|GO:0003779|GO:0006915		Mm.256765	18033
A_51_P494361	9.06336e-05	1.63208	down	6088.92	7674.72	7.35225	6.64554	6717.79	6527.85	5021.1	7425.44	7883.9	7714.81	7.41309	7.37395	7.26971	6.63645	6.66867	6.6315	NM_175341	chr14:120828398-120828457	Mbnl2	Mus musculus muscleblind-like 2 (Mbnl2), transcript variant 1, mRNA [NM_175341]	GO:0003676|GO:0005634|GO:0046872|GO:0008380|GO:0005737|GO:0008270|GO:0003723|GO:0006397	NM_175341	Mm.238266	105559	ENSMUST00000088418	TC1667465
A_51_P106799	0.000638174	3.30632	down	16290.3	10187	8.77926	7.05403	14998.6	15741.7	18130.5	10537.2	9891.94	10131.8	8.57186	8.64386	9.12206	7.14138	6.99602	7.02469	NM_011146	chr6:115440213-115440272	Pparg	Mus musculus peroxisome proliferator activated receptor gamma (Pparg), transcript variant 2, mRNA [NM_011146]	GO:0001818|GO:0045600|GO:0019395|GO:0006350|GO:0006954|GO:0003707|GO:0016566|GO:0050872|GO:0045892|GO:0045449|GO:0051974|GO:0030308|GO:0005634|GO:0046872|GO:0019216|GO:0010843|GO:0005829|GO:0015909|GO:0004879|GO:0003677|GO:0008270|GO:0050544|GO:0008285|GO:0045165|GO:0005515|GO:0004872|GO:0046321|GO:0003700|GO:0001890|GO:0010553|GO:0030855|GO:0045944|GO:0006355|GO:0010552|GO:0002674|GO:0043565|GO:…	NM_011146	Mm.3020	19016	ENSMUST00000000450	TC1584275
A_52_P302915	0.000680998	5.15013	down	91.5184	35.9023	1.25727	-1.10733	118.987	93.7948	61.7739	41.0744	37.0993	29.533	1.59397	1.25299	0.924852	-0.861645	-1.0627	-1.39766		chr5:27245583-27245524
A_52_P208665	0.021653	2.08681	down	1476.75	1438.8	5.2917	4.2304	1360.42	1179.69	1890.13	1396.54	1451.33	1468.53	5.10915	4.90575	5.86019	4.22582	4.22714	4.23824	NM_028108	chr16:44162181-44162240	Naa50	Mus musculus N(alpha)-acetyltransferase 50, NatE catalytic subunit (Naa50), mRNA [NM_028108]	GO:0005515|GO:0008415|GO:0008152|GO:0016740|GO:0006474|GO:0005737|GO:0008080	NM_028108	Mm.278726	72117		TC1577601
A_51_P289862	0.00590118	2.41659	down	6695.56	5519.77	7.43947	6.1665	8271.63	7635.43	4179.61	6023.61	5021.32	5514.36	7.71327	7.60005	7.00508	6.3346	6.01783	6.14706	NM_001081155	chr4:137285605-137285664	Rap1gap	Mus musculus Rap1 GTPase-activating protein (Rap1gap), mRNA [NM_001081155]	GO:0008150|GO:0003674|GO:0005575	NM_001081155	Mm.180763	110351	ENSMUST00000063471	TC1660620
A_51_P411707	0.0231323	1.6898	down	29.573	35.9594	-0.346957	-1.10381	26.4906	37.5994	24.6289	42.7367	32.29	32.8516	-0.573271	-0.065805	-0.401794	-0.80441	-1.263	-1.24402	NM_133761	chr14:31336047-31336106	Dcp1a	Mus musculus DCP1 decapping enzyme homolog A (S. cerevisiae) (Dcp1a), mRNA [NM_133761]	GO:0008134|GO:0007179|GO:0005667|GO:0005634|GO:0016787|GO:0000184|GO:0045941|GO:0005737	NM_133761	Mm.28733	75901	ENSMUST00000022535	TC1576910
A_51_P123017	0.00109188	3.49687	down	3819.61	2250.61	6.68108	4.87502	3576.96	3406.97	4474.9	2162.12	2375.99	2213.71	6.50383	6.43583	7.10356	4.85642	4.93829	4.83033	NM_011818	chr6:86641973-86641914	Gmcl1	Mus musculus germ cell-less homolog 1 (Drosophila) (Gmcl1), mRNA [NM_011818]	GO:0005634|GO:0005515|GO:0005635|GO:0007275|GO:0030154|GO:0007283|GO:0016363|GO:0045449	NM_011818	Mm.321452	23885	ENSMUST00000001185	TC1576321
A_51_P460459	0.0368298	3.83392	down	338.708	158.712	2.98431	1.04549	187.47	218.759	609.896	142.334	159.787	174.016	2.24983	2.47476	4.22835	0.931327	1.04398	1.16116	AK155135	chr6:50150287-50150228	Dfna5	Mus musculus NOD-derived CD11c +ve dendritic cells cDNA, RIKEN full-length enriched library, clone:F630203F04 product:Nonsyndromic hearing impairment protein 5 homolog [Mus musculus], full insert sequence. [AK155135]	GO:0005515|GO:0060113|GO:0007605|GO:0005575		Mm.478422	54722		TC1585331
A_51_P406253	0.000143328	2.51137	down	9031.28	7360.3	7.91358	6.58511	10730.9	9183.94	7179.05	7228.25	7210.15	7642.51	8.08879	7.86646	7.7855	6.59762	6.53979	6.61791	NM_008100	chr2:62312744-62312685	Gcg	Mus musculus glucagon (Gcg), mRNA [NM_008100]	GO:0005179|GO:0050796|GO:0007188|GO:0005576|GO:0031769|GO:0032099|GO:0005615	NM_008100	Mm.45494	14526	ENSMUST00000102733	TC1574634
A_52_P463346	0.000323094	2.68589	down	6685.74	5158.42	7.4978	6.0724	6839.44	6286.01	6931.77	4988.7	5253.24	5233.33	7.43898	7.31949	7.73493	6.06264	6.08297	6.0716	NM_012032	chr2:163449145-163449086	Serinc3	Mus musculus serine incorporator 3 (Serinc3), mRNA [NM_012032]	GO:0016020|GO:0005886|GO:0006917|GO:0016021|GO:0005794	NM_012032	Mm.218473	26943	ENSMUST00000017851	TC1573778
A_51_P456237	0.00011047	2.60491	down	76512.9	60971.8	11.0148	9.63355	80363.1	74411.1	74764.7	56084.5	63225.9	63604.8	10.9936	10.8848	11.166	9.5535	9.67221	9.67493	NM_008210	chr1:182732836-182732777	H3f3a	Mus musculus H3 histone, family 3A (H3f3a), mRNA [NM_008210]	GO:0005634|GO:0001740|GO:0003677|GO:0000786|GO:0005694|GO:0006334	NM_008210	Mm.315189	15078		TC1728836
A_52_P272915	9.10565e-05	2.87155	down	1026.45	741.461	4.79565	3.27382	1039.21	1018.06	1022.06	742.057	764.848	717.478	4.72059	4.69316	4.97319	3.31357	3.30301	3.20488	NM_177342	chr19:47157794-47157853	Taf5	Mus musculus TAF5 RNA polymerase II, TATA box binding protein (TBP)-associated factor (Taf5), mRNA [NM_177342]	GO:0030528|GO:0005634|GO:0008150|GO:0006350|GO:0003677|GO:0005669|GO:0045449	NM_177342	Mm.301522	226182		TC1581724
A_51_P308279	0.0192303	1.87377	down	46.3959	51.6485	0.318812	-0.587133	52.2835	39.6046	47.2995	62.8227	48.9878	43.135	0.4076	0.00915575	0.53968	-0.2486	-0.66167	-0.851129	NM_173868	chr1:6823756-6832275	St18	Mus musculus sdownpression of tumorigenicity 18 (St18), mRNA [NM_173868]	GO:0005634|GO:0003700|GO:0046872|GO:0006350|GO:0003677|GO:0008270|GO:0006355|GO:0000122|GO:0045449|GO:0016564	NM_173868	Mm.234612	240690	ENSMUST00000151281	TC1579346
A_52_P619820	0.00181113	1.69395	down	5256.41	6462.99	7.14916	6.38877	5394.86	5576.66	4797.71	5456.13	6967.46	6965.38	7.09669	7.14674	7.20406	6.19185	6.4904	6.48407	NM_001033225	chr4:33332677-33332618	Pnrc1	Mus musculus proline-rich nuclear receptor coactivator 1 (Pnrc1), mRNA [NM_001033225]	GO:0004872|GO:0008150|GO:0003674|GO:0005575	NM_001033225	Mm.27769	108767	ENSMUST00000049357	TC1575642
A_51_P237514	0.00356193	1.69058	down	6685.08	8194.79	7.49665	6.73914	7072.21	6173.29	6809.76	7691.02	8527.87	8365.49	7.48726	7.29338	7.70931	6.68714	6.78195	6.74832	NM_025437	chrX:155823495-155823554	Eif1ax	Mus musculus eukaryotic translation initiation factor 1A, Y-linked (Eif1ay), mRNA [NM_025437]	GO:0008150|GO:0003743|GO:0003674|GO:0006412|GO:0006413|GO:0003723|GO:0005575	NM_025437	Mm.294623	66235	ENSMUST00000087143	TC1572940
A_51_P403388	0.00012906	2.2649	down	14605.6	13357.9	8.62447	7.44502	15712.6	14102.2	14001.8	13145.1	13842.6	13086.2	8.63896	8.48519	8.74925	7.46042	7.48081	7.39384	NM_009949	chr4:107576610-107576571	Cpt2	Mus musculus carnitine palmitoyltransferase 2 (Cpt2), nuclear gene encoding mitochondrial protein, mRNA [NM_009949]	GO:0006629|GO:0004095|GO:0016020|GO:0008415|GO:0006631|GO:0016740|GO:0005739|GO:0006810|GO:0005743	NM_009949	Mm.307620	12896	ENSMUST00000106721	TC1574910
A_52_P340073	0.00035991	2.14487	down	2195.74	2121.68	5.89167	4.79078	2095.75	2304.29	2187.19	2061.68	2146.59	2156.78	5.73257	5.87167	6.07079	4.78779	4.79181	4.79275	NM_010111	chr8:8618236-8618177	Efnb2	Mus musculus ephrin B2 (Efnb2), mRNA [NM_010111]	GO:0007399|GO:0001945|GO:0005515|GO:0016020|GO:0009887|GO:0005886|GO:0007275|GO:0030154|GO:0007219|GO:0016021|GO:0005102	NM_010111	Mm.209813	13642	ENSMUST00000001319	TC1628729
A_52_P105147	9.21472e-06	2.44914	down	839.758	709.721	4.5011	3.20883	907.902	865.712	745.659	653.692	745.473	729.998	4.52571	4.4593	4.5183	3.13065	3.26599	3.22983	NM_177798	chr10:116507300-116507241	Frs2	Mus musculus fibroblast growth factor receptor substrate 2 (Frs2), mRNA [NM_177798]	GO:0005515|GO:0005069|GO:0005886|GO:0008543|GO:0005104|GO:0030900|GO:0001702|GO:0050678|GO:0046619|GO:0000187|GO:0016020|GO:0001759|GO:0003281|GO:0005737|GO:0008595|GO:0005158|GO:0007405|GO:0060527|GO:0007169	NM_177798	Mm.135965	327826	ENSMUST00000020381	TC1580972
A_51_P294979	0.0832282	2.13504	down	21550.4	18179.5	8.98344	7.88918	17938.9	36797.3	9915.13	19064.8	17980.3	17493.5	8.83012	9.86887	8.25134	7.99681	7.85811	7.81261	NM_013602	chr8:96704011-96704070	Mt1	Mus musculus metallothionein 1 (Mt1), mRNA [NM_013602]	GO:0005764|GO:0010273|GO:0006875|GO:0046872|GO:0005829|GO:0006882|GO:0007263|GO:0008270|GO:0005507	NM_013602	Mm.192991	17748	ENSMUST00000062980	TC1589649
A_51_P427505	0.000985274	1.74976	down	1333.92	1581.66	5.17339	4.36623	1374.07	1308.97	1318.72	1554.66	1523.55	1666.78	5.12356	5.05578	5.34084	4.38057	4.2972	4.42093	NM_025673	chr15:12279503-12279562	Golph3	Mus musculus golgi phosphoprotein 3 (Golph3), mRNA [NM_025673]	GO:0016020|GO:0005886|GO:0005737|GO:0005768|GO:0005739|GO:0005794	NM_025673	Mm.250936	66629	ENSMUST00000059680	TC1574349
A_52_P981587	0.00264656	2.81561	down	6096.45	4465.31	7.35449	5.86104	5213.31	5978.66	7097.37	4203.28	4915.07	4277.59	7.0473	7.24717	7.769	5.81548	5.98698	5.78067	C80049	chr15:077591166-077591225		C80049 C80049 Mouse 3.5-dpc blastocyst cDNA Mus musculus cDNA clone J0075G08 3' similar to R.norvegicus mRNA for parathyroid hormone regulated, mRNA sequence [C80049]						TC1673862
A_52_P246992	0.00281781	2.0718	down	223.509	221.545	2.57886	1.52797	192.529	273.785	204.215	200.071	229.77	234.793	2.28825	2.79846	2.64987	1.42256	1.56803	1.59333	NR_015490	chr3:95190612-95190553	4930558C23Rik	Mus musculus RIKEN cDNA 4930558C23 gene (4930558C23Rik), non-coding RNA [NR_015490]	GO:0008150|GO:0003674|GO:0005575	NR_015490	Mm.75066	67654		TC1604406
A_51_P431827	0.000894997	4.70492	down	454.167	194.271	3.56911	1.33494	358.579	630.894	373.028	173.235	189.577	220	3.18546	4.00281	3.51906	1.21477	1.29062	1.49944	NM_020253	chr19:6532047-6532106	Nrxn2	Mus musculus neurexin II (Nrxn2), mRNA [NM_020253]	GO:0007268|GO:0007416|GO:0016020|GO:0005246|GO:0042734|GO:0007269|GO:0016021	NM_020253	Mm.329616	18190	ENSMUST00000113461	TC1582533
A_51_P214251	0.000346995	2.81502	down	240.018	176.753	2.69817	1.20503	236.753	230.507	252.792	170.866	183.729	175.665	2.58656	2.55023	2.95774	1.19491	1.24541	1.17476	NM_001167818	chr19:33242836-33212730	Rnls	Mus musculus renalase, FAD-dependent amine oxidase (Rnls), transcript variant 1, mRNA [NM_001167818]	GO:0005576|GO:0008150|GO:0003674|GO:0016491|GO:0005575|GO:0055114	NM_001167818	Mm.204591	67795	ENSMUST00000096114	TC1584897
A_52_P185059	0.000457468	2.81559	down	86.4565	62.641	1.19917	-0.294271	96.6706	98.6065	64.0925	68.6972	58.6869	60.5389	1.29432	1.32517	0.978011	-0.119635	-0.401054	-0.362125	AK004111	chr7:29941625-29941684		Mus musculus 18-day embryo whole body cDNA, RIKEN full-length enriched library, clone:1110035H17 product:hypothetical protein, full insert sequence. [AK004111]			Mm.260890		ENSMUST00000053062	TC1665066
A_51_P397296	0.000165863	2.05652	down	4053.66	4070.46	6.7711	5.7309	4583.33	3875.16	3702.48	3995.59	4145.82	4069.97	6.8615	6.6216	6.8302	5.74238	5.74142	5.70889	NM_028584	chr8:112477142-112477083	Marveld3	Mus musculus MARVEL (membrane-associating) domain containing 3 (Marveld3), transcript variant 1, mRNA [NM_028584]	GO:0016020|GO:0008150|GO:0003674|GO:0016021|GO:0005575	NM_028584	Mm.86833	73608	ENSMUST00000051430	TC1584380
A_51_P224771	0.000263281	1.96792	down	6049.7	6322.06	7.34232	6.36565	7081.02	5940.73	5127.34	6229.35	6155.69	6581.14	7.48906	7.23798	7.29992	6.38305	6.31168	6.40221	NM_172608	chr15:79191307-79191248	Tmem184b	Mus musculus transmembrane protein 184b (Tmem184b), mRNA [NM_172608]	GO:0016020|GO:0008150|GO:0003674|GO:0016021|GO:0005575	NM_172608	Mm.323358	223693	ENSMUST00000074991	TC1575012
A_51_P324303	0.00735788	1.98309	down	1034.52	1076.26	4.77964	3.79189	1259.6	1062.26	781.696	937.233	953.899	1337.64	4.99807	4.75447	4.58639	3.65045	3.62167	4.10356	NM_153789	chr13:45506979-45507038	Mylip	Mus musculus myosin regulatory light chain interacting protein (Mylip), transcript variant 1, mRNA [NM_153789]	GO:0042787|GO:0005515|GO:0008092|GO:0008150|GO:0042632|GO:0032803|GO:0019898|GO:0005488|GO:0055098|GO:0010989|GO:0016567|GO:0031648|GO:0046872|GO:0003674|GO:0045732|GO:0005737|GO:0005856|GO:0008270|GO:0005575|GO:0016874	NM_153789	Mm.212855	218203	ENSMUST00000038275	TC1592256
A_51_P285779	0.00777212	2.48741	down	184.068	152.328	2.28116	0.966519	241.835	165.885	144.483	188.419	119.858	148.707	2.6172	2.0756	2.15069	1.33598	0.629158	0.934415	NM_028386	chr5:112814665-112814606	Asphd2	Mus musculus aspartate beta-hydroxylase domain containing 2 (Asphd2), mRNA [NM_028386]	GO:0018193|GO:0030176|GO:0016020|GO:0008150|GO:0003674|GO:0004597|GO:0016702|GO:0016491|GO:0016021|GO:0005575|GO:0055114	NM_028386	Mm.151745	72898	ENSMUST00000031291	TC1582431
A_51_P136888	0.00111421	3.72469	down	5475.51	3021.72	7.19828	5.30116	4977.16	4916.78	6532.6	3018.65	3060.73	2985.78	6.98042	6.96506	7.64937	5.33787	5.30364	5.26198	NM_009029	chr14:73595467-73595408	Rb1	Mus musculus retinoblastoma 1 (Rb1), mRNA [NM_009029]	GO:0045786|GO:0005819|GO:0005515|GO:0051726|GO:0006350|GO:0051146|GO:0045944|GO:0043353|GO:0051301|GO:0007049|GO:0045892|GO:0045449|GO:0045651|GO:0005634|GO:0005667|GO:0008134|GO:0016568|GO:0003677|GO:0000082|GO:0007050|GO:0000122|GO:0008285|GO:0016564	NM_009029	Mm.273862	19645	ENSMUST00000022701	TC1577332
A_51_P158584	0.00193845	1.6319	down	680.951	853.718	4.18352	3.47696	776.565	737.838	528.45	887.27	853.395	820.49	4.30028	4.22872	4.02155	3.57142	3.46105	3.39843	NM_020032	chr19:45626917-45626858	Poll	Mus musculus polymerase (DNA directed), lambda (Poll), mRNA [NM_020032]	GO:0016740|GO:0006289|GO:0003824|GO:0006281|GO:0006974|GO:0005634|GO:0016829|GO:0046872|GO:0003677|GO:0016779|GO:0006260|GO:0006287|GO:0003887|GO:0005622	NM_020032	Mm.46509	56626	ENSMUST00000026239	TC1581790
A_52_P185266	0.0214457	1.51483	down	2596.03	3552.35	6.131	5.53184	2574.25	2390.38	2823.46	3244.99	3722.88	3689.18	6.02926	5.92458	6.43918	5.44218	5.58618	5.56717	NM_007684	chr13:81931126-81935691	Cetn3	Mus musculus centrin 3 (Cetn3), mRNA [NM_007684]	GO:0005932|GO:0007067|GO:0005814|GO:0005856|GO:0005737|GO:0031683|GO:0051301|GO:0032391|GO:0007049|GO:0005509	NM_007684	Mm.12481	12626	ENSMUST00000022009	TC1716605
A_51_P367395	0.00245478	2.28751	down	3321.81	2924.22	6.44575	5.25197	4121.09	3575.6	2268.74	2741.74	3113.7	2917.2	6.70813	6.50553	6.1236	5.19906	5.32839	5.22845	NM_138583	chr16:18301164-18301105	D16H22S680E	Mus musculus DNA segment, Chr 16, human D22S680E, expressed (D16H22S680E), mRNA [NM_138583]	GO:0008150|GO:0003674|GO:0005575	NM_138583	Mm.265990	27883	ENSMUST00000115628	TC1577778
A_52_P195246	0.00165319	2.4877	down	119.517	98.6919	1.67409	0.359273	105.389	148.007	105.153	104.366	86.6053	105.105	1.4189	1.91108	1.69227	0.483688	0.160363	0.433767	NM_177775	chr9:99210836-99210777	Esyt3	Mus musculus extended synaptotagmin-like protein 3 (Esyt3), mRNA [NM_177775]	GO:0016020|GO:0008150|GO:0003674|GO:0005886|GO:0016021|GO:0005575	NM_177775	Mm.258310	272636	ENSMUST00000042158	TC1584431
A_52_P566741	0.000458734	2.61787	down	7338.84	5848.64	7.63329	6.2449	7204.03	7552.9	7259.59	5058.36	6659.89	5827.69	7.51391	7.58437	7.8016	6.08264	6.42526	6.22679	NM_009333	chr19:56007586-56007645	Tcf7l2	Mus musculus transcription factor 7-like 2, T-cell specific, HMG-box (Tcf7l2), transcript variant 3, mRNA [NM_009333]	GO:0021915|GO:0005515|GO:0006350|GO:0010551|GO:0030538|GO:0048619|GO:0045944|GO:0006355|GO:0016055|GO:0035019|GO:0045449|GO:0005634|GO:0005667|GO:0032024|GO:0005829|GO:0048557|GO:0003677|GO:0045941|GO:0008013|GO:0009749	NM_009333	Mm.139815	21416	ENSMUST00000111662	NP579898
A_51_P124467	0.000395503	1.66652	down	2432.86	3013.02	6.03337	5.29653	2750.25	2398.14	2150.19	3017.97	3111.97	2909.12	6.12467	5.92926	6.04618	5.33755	5.32759	5.22445	NM_027498	chr9:46032205-46032264	Sik3	Mus musculus SIK family kinase 3 (Sik3), mRNA [NM_027498]	GO:0004672|GO:0046872|GO:0008150|GO:0004674|GO:0003674|GO:0005524|GO:0016740|GO:0016301|GO:0006468|GO:0005737|GO:0000166|GO:0005575	NM_027498	Mm.219459	70661	ENSMUST00000078669	TC1578880
A_52_P1165006	0.000443897	2.00814	down	43.7089	45.0353	0.234792	-0.771067	47.053	46.4253	37.6484	49.3321	40.9857	44.7882	0.255534	0.238398	0.210444	-0.597359	-0.918972	-0.796869		chr2:025633632-025633343
A_51_P505907	1.48523e-05	3.75532	down	211.559	116.75	2.51589	0.606953	207.46	224.095	203.122	115.334	120.661	114.256	2.39601	2.50952	2.64213	0.627857	0.638794	0.554207	NM_013775	chr12:106392958-106393017	Tcl1b2	Mus musculus T-cell leukemia/lymphoma 1B, 2 (Tcl1b2), mRNA [NM_013775]		NM_013775	Mm.103653	27381	ENSMUST00000142230	TC1603748
A_52_P576818	0.0228883	1.53769	down	40.2166	53.002	0.085959	-0.534805	50.9574	40.3171	29.3754	57.7414	50.0848	51.1797	0.370537	0.0348773	-0.147538	-0.370279	-0.629718	-0.604417	XM_001477890	chr1:37243958-37244446		Putative uncharacterized protein [Source:UniProtKB/TrEMBL;Acc:Q9D5X0] [ENSMUST00000027289]		XM_001477890	Mm.148848		ENSMUST00000027289	TC1586567
A_52_P134041	0.0122555	3.45329	down	85.0261	53.9249	1.18838	-0.599592	76.7639	102.069	76.2454	72.0138	30.1153	59.6458	0.961674	1.37496	1.22851	-0.0516133	-1.3636	-0.383567	AK017327	chr11:76016014-76015955		Mus musculus 6 days neonate head cDNA, RIKEN full-length enriched library, clone:5430420K21 product:hypothetical protein, full insert sequence. [AK017327]						TC1595584
A_51_P440399	0.000129293	2.10881	down	9826.97	9673.54	8.05425	6.97782	10082.5	9943.85	9454.61	8947.35	10021.6	10051.7	7.99888	7.98115	8.18273	6.90543	7.0148	7.01324	NM_012060	chrX:70931784-70931725	Bcap31	Mus musculus B-cell receptor-associated protein 31 (Bcap31), mRNA [NM_012060]	GO:0006886|GO:0016192|GO:0016020|GO:0006955|GO:0015031|GO:0005886|GO:0000139|GO:0006915|GO:0016021|GO:0007283|GO:0006810|GO:0005783	NM_012060	Mm.17	27061	ENSMUST00000002091	TC1572369
A_51_P149373	0.000430624	1.94454	down	776.32	827.397	4.3845	3.42507	844.803	821.518	662.639	716.093	913.701	852.398	4.42179	4.38371	4.34801	3.26219	3.55956	3.45347	NM_028149	chr11:97944055-97943996	Fbxl20	Mus musculus F-box and leucine-rich repeat protein 20 (Fbxl20), mRNA [NM_028149]	GO:0005515|GO:0008150|GO:0005737|GO:0005575	NM_028149	Mm.218350	72194	ENSMUST00000103143	TC1776674
A_51_P197213	0.00299653	2.04834	down	5049.83	5076.38	7.07009	6.03563	5747.65	5591.67	3810.18	4112.63	5584.68	5531.83	7.18807	7.15062	6.87157	5.78403	6.17124	6.15163	NM_025802	chr7:148645930-148645989	Pnpla2	Mus musculus patatin-like phospholipase domain containing 2 (Pnpla2), transcript variant 2, mRNA [NM_025802]	GO:0004806|GO:0005886|GO:0005811|GO:0006629|GO:0016042|GO:0016787|GO:0016020|GO:0005829|GO:0008152|GO:0010898|GO:0019433|GO:0010891|GO:0016021	NM_025802	Mm.29998	66853	ENSMUST00000026583	NP967370
A_52_P253136	3.54482e-05	2.19822	down	188.553	176.786	2.34179	1.20546	188.861	214.476	162.322	170.763	181.822	177.771	2.2605	2.44623	2.31864	1.19404	1.23036	1.19196	NM_172054	chr1:38042616-38042557	Txndc9	Mus musculus thioredoxin domain containing 9 (Txndc9), mRNA [NM_172054]	GO:0008150|GO:0003674|GO:0045454|GO:0005575	NM_172054	Mm.28438	98258		TC1572715
A_51_P257119	0.00411754	1.75811	down	935.833	1104.74	4.66179	3.84776	914.37	919.383	973.745	1165.83	1032.11	1116.3	4.53595	4.54608	4.90333	3.96532	3.73536	3.84259	NM_029736	chr8:81257629-81257688	Slc10a7	Mus musculus solute carrier family 10 (sodium/bile acid cotransporter family), member 7 (Slc10a7), mRNA [NM_029736]	GO:0015293|GO:0016020|GO:0008150|GO:0003674|GO:0006814|GO:0006811|GO:0008508|GO:0016021|GO:0005575|GO:0006810	NM_029736	Mm.334631	76775	ENSMUST00000034111	TC1625049
A_52_P574685	0.000323807	2.0304	down	82.9964	84.8252	1.16588	0.144115	82.3238	87.7312	78.9343	85.6733	78.5047	90.2976	1.06255	1.15658	1.27851	0.19896	0.0186863	0.214699	AK036758	chrX:12320194-12320135	Med14	Mus musculus adult female vagina cDNA, RIKEN full-length enriched library, clone:9930001L01 product:cofactor required for Sp1 transcriptional activation subunit 2 (150 kDa), full insert sequence. [AK036758]	GO:0016455|GO:0005634|GO:0005515|GO:0003713|GO:0006350|GO:0006357|GO:0045944|GO:0016592|GO:0045449		Mm.459412	26896
A_51_P159573	0.0113529	2.26545	down	78.163	67.9596	1.00404	-0.175755	107.68	78.8542	47.9545	69.0574	72.1167	62.7047	1.44993	1.00267	0.559522	-0.112091	-0.10376	-0.311415	NM_001011819	chr11:58645374-58645433	Olfr312	Mus musculus olfactory receptor 312 (Olfr312), mRNA [NM_001011819]	GO:0004872|GO:0004984|GO:0004930|GO:0007608|GO:0007186|GO:0004871|GO:0016021|GO:0007165	NM_001011819	Mm.377273	258065	ENSMUST00000078217	TC1600242
A_51_P189051	0.05959	2.09054	down	148.282	155.85	1.99932	0.935437	132.235	150.13	162.48	231.592	99.936	136.021	1.74627	1.93163	2.32004	1.63363	0.366912	0.805769	NM_026814	chr11:120411418-120411359	Dysfip1	Mus musculus dysferlin interacting protein 1 (Dysfip1), mRNA [NM_026814]	GO:0008150|GO:0003674|GO:0005575	NM_026814	Mm.46477	68701	ENSMUST00000026121	TC1585103
A_52_P196476	0.0226573	2.27748	down	955.455	812.358	4.5864	3.39897	1377.73	958.919	529.712	705.308	893.903	837.862	5.1274	4.60682	4.02499	3.2403	3.52795	3.42865	NM_001146161	chr15:100223406-100223347	Slc11a2	Mus musculus solute carrier family 11 (proton-codownled divalent metal ion transporters), member 2 (Slc11a2), transcript variant 1, mRNA [NM_001146161]	GO:0005886|GO:0055037|GO:0015094|GO:0048813|GO:0005765|GO:0015992|GO:0006810|GO:0005506|GO:0015093|GO:0016020|GO:0006811|GO:0050897|GO:0008270|GO:0060586|GO:0012505|GO:0016021|GO:0045177|GO:0006824|GO:0015086|GO:0005903|GO:0005215|GO:0005375|GO:0046870|GO:0015684|GO:0006778|GO:0009986|GO:0015078|GO:0005768|GO:0016151|GO:0006826|GO:0031902|GO:0030145|GO:0005769|GO:0005887|GO:0010042|GO:0007611|GO:…	NM_001146161	Mm.234608	18174	ENSMUST00000138843	TC1580405
A_51_P277718	0.00680878	1.94806	down	923.437	985.399	4.6392	3.67716	861.77	888.492	1020.05	848.071	1069.06	1039.07	4.45048	4.49677	4.97035	3.50623	3.7861	3.73916	NM_007683	chr5:86445276-86442526	Cenpc1	Mus musculus centromere protein C1 (Cenpc1), mRNA [NM_007683]	GO:0005634|GO:0005515|GO:0000775|GO:0003677|GO:0005694|GO:0000776	NM_007683	Mm.4649	12617	ENSMUST00000031170	TC1587331
A_52_P145237	8.24927e-05	2.29765	down	661.726	597.442	4.15991	2.95975	712.183	654.922	618.075	548.323	602.389	641.616	4.17542	4.05674	4.24756	2.87707	2.95853	3.04365	AK031113	chrX:155825045-155825104	Eif1ax	eukaryotic translation initiation factor 1A, Y-linked Gene [Source:MGI Symbol;Acc:MGI:1913485] [ENSMUST00000087143]	GO:0008150|GO:0003743|GO:0003674|GO:0006412|GO:0006413|GO:0003723|GO:0005575		Mm.294623	66235	ENSMUST00000087143	TC1572940
A_51_P489086	0.000528655	1.96998	down	1533.05	1614.68	5.37414	4.39596	1495.11	1573.14	1530.89	1529.6	1630.19	1684.24	5.24535	5.32099	5.55608	4.35712	4.3948	4.43597	NM_001163564	chr8:69414255-69414314	Naf1	Mus musculus nuclear assembly factor 1 homolog (S. cerevisiae) (Naf1), mRNA [NM_001163564]	GO:0030515|GO:0005634|GO:0008150|GO:0003674|GO:0031429|GO:0005737|GO:0003723|GO:0009982|GO:0030529|GO:0006364|GO:0005575|GO:0042254	NM_001163564	Mm.334561	234344	ENSMUST00000118009	TC1632851
A_51_P406454	0.000614988	2.85167	down	11687.3	8479.66	8.30065	6.78885	12165.2	10449.7	12447	8076.66	8857.3	8505.01	8.26979	8.05273	8.57944	6.75773	6.83663	6.77218	NM_008349	chr16:91425892-91425951	Il10rb	Mus musculus interleukin 10 receptor, beta (Il10rb), mRNA [NM_008349]	GO:0007596|GO:0005515|GO:0004872|GO:0016020|GO:0004920|GO:0016021	NM_008349	Mm.4154	16155	ENSMUST00000156133	TC1577442
A_51_P364788	0.000917319	4.04326	down	101.567	52.8277	1.4527	-0.562822	93.4187	114.603	96.68	56.6846	39.6122	62.1864	1.24496	1.54206	1.57107	-0.39693	-0.968146	-0.32339	NM_030679	chr11:67022830-67023932	Myh1	Mus musculus myosin, heavy polypeptide 1, skeletal muscle, adult (Myh1), mRNA [NM_030679]	GO:0005859|GO:0031672|GO:0032982|GO:0005524|GO:0016459|GO:0005516|GO:0005737|GO:0003779|GO:0003774|GO:0000166	NM_030679	Mm.422801	17879	ENSMUST00000018637	TC1585446
A_51_P339268	0.0386458	1.90996	down	611.183	681.974	4.0251	3.09156	673.094	694.531	465.924	423.779	804.13	818.012	4.09398	4.14145	3.83988	2.50536	3.37526	3.39406	NM_133672	chr10:61918326-61918267	Vps26a	Mus musculus vacuolar protein sorting 26 homolog A (yeast) (Vps26a), transcript variant 1, mRNA [NM_133672]	GO:0007034|GO:0005515|GO:0042147|GO:0016020|GO:0015031|GO:0005737|GO:0005768|GO:0030904|GO:0006810	NM_133672	Mm.260703	30930	ENSMUST00000105447	TC1592011
A_52_P575874	0.0312336	2.29722	down	90.8538	78.9343	1.24211	0.0422201	66.5703	79.0523	126.939	77.5198	77.5677	81.7153	0.756124	1.00629	1.96392	0.0546789	0.00136328	0.0706182	AK163649	chr2:23054122-23054181	Yme1l1	YME1-like 1 (S. cerevisiae) Gene [Source:MGI Symbol;Acc:MGI:1351651] [ENSMUST00000028117]	GO:0006508|GO:0016787|GO:0046872|GO:0016020|GO:0005524|GO:0004222|GO:0017111|GO:0008233|GO:0005739|GO:0008237|GO:0000166|GO:0030163		Mm.23335	27377	ENSMUST00000028117
A_51_P116023	0.0254864	1.77695	down	36.9809	43.05	-0.0164059	-0.845807	30.4058	44.4252	36.1118	51.1289	36.6429	41.3782	-0.37441	0.174865	0.150327	-0.545748	-1.08056	-0.911116	NM_027543	chrX:148781004-148780945	Gpr173	Mus musculus G-protein codownled receptor 173 (Gpr173), mRNA [NM_027543]	GO:0004872|GO:0016020|GO:0008150|GO:0004930|GO:0003674|GO:0005886|GO:0007186|GO:0004871|GO:0016021|GO:0007165|GO:0005575	NM_027543	Mm.158445	70771	ENSMUST00000070316	TC1590592
A_52_P17146	8.43808e-05	2.08953	down	2242.98	2222.26	5.91805	4.85487	2483.03	2238.21	2007.69	2026.01	2282.89	2357.89	5.9772	5.82969	5.94725	4.76261	4.88062	4.92137	NM_009758	chr14:35224398-35224339	Bmpr1a	Mus musculus bone morphogenetic protein receptor, type 1A (Bmpr1a), mRNA [NM_009758]	GO:0004672|GO:0051216|GO:0050679|GO:0001880|GO:0050768|GO:0016020|GO:0016301|GO:0006468|GO:0048368|GO:0004872|GO:0030509|GO:0048378|GO:0060896|GO:0016740|GO:0060021|GO:0007507|GO:0001707|GO:0019827|GO:0007399|GO:0007492|GO:0005524|GO:0030154|GO:0009953|GO:0030324|GO:0048339|GO:0048589|GO:0060914|GO:0000166|GO:0003007|GO:0046872|GO:0021983|GO:0048382|GO:0048352|GO:0005024|GO:0016021|GO:0009950|GO:…	NM_009758	Mm.237825	12166	ENSMUST00000049005	TC1669064
A_51_P301636	0.00111691	2.07597	down	2965.54	2900.9	6.29613	5.24235	3271.57	3463.68	2161.39	2920.23	2895.07	2887.38	6.37508	6.45965	6.05367	5.29005	5.22336	5.21363	NM_001109685	chr4:141695278-141695219	9030409G11Rik	Mus musculus RIKEN cDNA 9030409G11 gene (9030409G11Rik), transcript variant 3, mRNA [NM_001109685]	GO:0030057|GO:0005634|GO:0030054|GO:0031424|GO:0005856|GO:0005737|GO:0001533	NM_001109685	Mm.255986	71529	ENSMUST00000129032	TC1579461
A_52_P558988	0.0162695	1.52692	down	38.2635	52.0941	0.043304	-0.567319	37.517	43.1888	34.0847	60.4956	50.5572	45.2294	-0.0712109	0.134142	0.0669804	-0.303055	-0.616176	-0.782726	NM_001080707	chr2:73194678-73191775	Gpr155	Mus musculus G protein-codownled receptor 155 (Gpr155), mRNA [NM_001080707]	GO:0004872|GO:0008150|GO:0003674|GO:0005575	NM_001080707	Mm.241098	68526	ENSMUST00000048504	TC1621593
A_51_P148494	0.00144835	3.65011	down	3717.96	2091.05	6.63719	4.76924	3339.49	3306.67	4507.71	1994.9	2112.52	2165.72	6.40473	6.39272	7.1141	4.74029	4.76873	4.79872	NM_029788	chr11:86309517-86309576	Rnft1	Mus musculus ring finger protein, transmembrane 1 (Rnft1), mRNA [NM_029788]	GO:0005515|GO:0046872|GO:0016020|GO:0008150|GO:0003674|GO:0008270|GO:0016021|GO:0005575	NM_029788	Mm.262707	76892	ENSMUST00000020827	TC1574572
A_52_P82247	0.00201736	2.79119	down	12946.4	9561.12	8.44319	6.96232	11250	12738.5	14850.7	9740.92	9135.14	9807.32	8.15695	8.33846	8.83417	7.02803	6.88119	6.97773	NM_007808	chr6:50514581-50514522	Cycs	Mus musculus cytochrome c, somatic (Cycs), nuclear gene encoding mitochondrial protein, mRNA [NM_007808]	GO:0070469|GO:0005739|GO:0006123|GO:0042743|GO:0006810|GO:0043065|GO:0005506|GO:0006979|GO:0009055|GO:0008635|GO:0046872|GO:0005829|GO:0020037|GO:0006915|GO:0022900|GO:0005625	NM_007808	Mm.35389	13063	ENSMUST00000073080	TC1573177
A_52_P481182	0.00460729	3.43545	down	2010.25	1184.8	5.73072	3.95022	1709.16	1663.86	2657.72	1155.97	1213.68	1184.74	5.43839	5.40188	6.3519	3.95308	3.96915	3.92844	NM_023377	chr7:90790202-90790261	Stard5	Mus musculus StAR-related lipid transfer (START) domain containing 5 (Stard5), mRNA [NM_023377]	GO:0008289|GO:0015485|GO:0006869|GO:0006694|GO:0017127|GO:0006810	NM_023377	Mm.357953	170460	ENSMUST00000075418	TC1576191
A_52_P54439	0.0360274	7.43164	down	410.818	157.175	3.47391	0.580225	405.203	398.438	428.812	31.0276	226.137	214.361	3.36182	3.33977	3.72013	-1.26633	1.54503	1.46198	NM_010878	chr9:100395624-100395565	Nck1	Mus musculus non-catalytic region of tyrosine kinase adaptor protein 1 (Nck1), mRNA [NM_010878]	GO:0007015|GO:0005515|GO:0016477|GO:0012506|GO:0030032|GO:0016301|GO:0019904	NM_010878	Mm.181485	17973	ENSMUST00000035050	TC1578812
A_51_P494686	0.00220645	1.62742	down	1382.39	1762.13	5.22399	4.52141	1457.98	1319.61	1369.58	1641.9	1843	1801.49	5.20908	5.06745	5.39545	4.45933	4.57182	4.53306	NM_145937	chr6:108057132-108057073	Sumf1	Mus musculus sulfatase modifying factor 1 (Sumf1), mRNA [NM_145937]	GO:0005515|GO:0046872|GO:0016491|GO:0042803|GO:0005783|GO:0055114	NM_145937	Mm.439876	58911	ENSMUST00000032191	TC1579157
A_51_P450278	0.00129431	2.07061	down	2391.07	2396.17	6.01515	4.9651	2313.35	2384.58	2475.27	2432.97	2506.5	2249.02	5.87508	5.92108	6.2493	5.02669	5.01544	4.85317	NM_027237	chr19:4496987-4496928	2010003K11Rik	Mus musculus RIKEN cDNA 2010003K11 gene (2010003K11Rik), mRNA [NM_027237]	GO:0008150|GO:0003674|GO:0005575	NM_027237	Mm.282978	69861	ENSMUST00000048482	TC1585178
A_51_P282930	0.000631661	4.07476	down	2312.84	1142.87	5.92104	3.89432	3107.03	2153.55	1677.95	1150.69	1245.01	1032.9	6.30064	5.77406	5.68841	3.94647	4.00592	3.73057	NM_011281	chr3:94201609-94201668	Rorc	Mus musculus RAR-related orphan receptor gamma (Rorc), mRNA [NM_011281]	GO:0033077|GO:0004872|GO:0003700|GO:0006350|GO:0003707|GO:0048537|GO:0030154|GO:0006355|GO:0045449|GO:0005634|GO:0043565|GO:0046872|GO:0048535|GO:0003677|GO:0004879|GO:0006468|GO:0008270|GO:0046632	NM_011281	Mm.4372	19885	ENSMUST00000029795	TC1582154
A_51_P392242	1.64944e-05	2.01033	down	583.232	597.301	3.96961	2.96218	645.146	616.987	487.563	590.938	588.863	612.103	4.0328	3.97066	3.90537	2.98505	2.92577	2.97572	NM_007912	chr11:16787385-16787444	Egfr	Mus musculus epidermal growth factor receptor (Egfr), transcript variant 2, mRNA [NM_007912]	GO:0004672|GO:0004713|GO:0048812|GO:0004888|GO:0005886|GO:0005006|GO:0043066|GO:0050679|GO:0005634|GO:0048547|GO:0016020|GO:0030139|GO:0006468|GO:0016301|GO:0007173|GO:0060571|GO:0008284|GO:0016323|GO:0004872|GO:0007243|GO:0016740|GO:0007165|GO:0008544|GO:0004871|GO:0007169|GO:0005524|GO:0000186|GO:0050730|GO:0021795|GO:0000166|GO:0001892|GO:0046777|GO:0007166|GO:0006412|GO:0051592|GO:0016021|GO:…	NM_007912	Mm.8534	13649	ENSMUST00000102884	TC1586294
A_52_P466701	7.08334e-05	2.11642	down	6279.31	6109.65	7.39778	6.31615	6775.08	6838.26	5224.58	6388.52	6038.67	5901.75	7.42534	7.44097	7.32703	6.41945	6.28399	6.24501	NM_026928	chr7:147285592-147285533	1810014F10Rik	Mus musculus RIKEN cDNA 1810014F10 gene (1810014F10Rik), mRNA [NM_026928]	GO:0008150|GO:0005575|GO:0042806|GO:0008643	NM_026928	Mm.41915	69064	ENSMUST00000026539	NP955216
A_51_P300297	0.00476713	2.7745	down	1853.29	1366.1	5.62764	4.15541	1759.86	1520.6	2279.41	1335.33	1417.92	1345.05	5.48057	5.27198	6.13037	4.16117	4.19354	4.11153	NM_026075	chr13:105628341-105628400	Sfrs12ip1	Mus musculus SFRS12-interacting protein 1 (Sfrs12ip1), mRNA [NM_026075]	GO:0003676|GO:0046872|GO:0008150|GO:0003674|GO:0008380|GO:0008270|GO:0006397|GO:0005575	NM_026075	Mm.125465	67288	ENSMUST00000156105	TC1579411
A_52_P599680	1.53639e-05	9.42735	down	370.964	81.6811	3.3209	0.0840453	373.523	412.486	326.884	91.6988	70.8971	82.4472	3.24437	3.38976	3.32856	0.297018	-0.128365	0.0834832	NM_053198	chr19:60913464-60913405	Sfxn4	Mus musculus sideroflexin 4 (Sfxn4), mRNA [NM_053198]	GO:0016020|GO:0008150|GO:0003674|GO:0055085|GO:0006811|GO:0006812|GO:0005739|GO:0016021|GO:0006826|GO:0008324|GO:0006810	NM_053198	Mm.48179	94281	ENSMUST00000080806	TC1634542
A_52_P132791	0.00851791	2.01013	down	60.7809	63.6671	0.716948	-0.290339	58.4522	60.3279	63.5625	48.4828	72.7999	69.7184	0.568502	0.616311	0.966031	-0.622413	-0.0901556	-0.158448	NM_001025373	chr17:22129714-22129773	4930432O21Rik	Mus musculus RIKEN cDNA 4930432O21 gene (4930432O21Rik), mRNA [NM_001025373]	GO:0046872|GO:0008150|GO:0003674|GO:0005575	NM_001025373	Mm.26540	74670	ENSMUST00000091879	TC1583369
A_52_P423978	0.000464036	1.75155	down	326.41	385.33	3.13329	2.32466	343.677	359.919	275.636	339.464	404.741	411.785	3.12423	3.19309	3.08255	2.1853	2.38483	2.40383	NM_013844	chr5:139047914-139047855	Zfp68	Mus musculus zinc finger protein 68 (Zfp68), transcript variant 1, mRNA [NM_013844]	GO:0046872|GO:0008150|GO:0003674|GO:0005575	NM_013844	Mm.27575	24135	ENSMUST00000063262	TC1584603
A_52_P497424	7.92818e-05	5.09965	down	180.353	73.3389	2.28361	-0.0667877	166.111	196.109	178.838	80.5262	70.1335	69.357	2.07532	2.31707	2.45844	0.109572	-0.143988	-0.165947	AF004109	chr11:116457407-116457466		arylalkylamine N-acetyltransferase Gene [Source:MGI Symbol;Acc:MGI:1328365] [ENSMUST00000021159]			Mm.42233		ENSMUST00000021159	TC1776634
A_52_P432787	0.000159564	1.68711	down	1175.66	1436.21	4.98225	4.22769	1325.05	1196.95	1004.99	1438.9	1391.71	1478	5.07115	4.92671	4.94889	4.26894	4.16663	4.24752	NM_026794	chr9:121621691-121621750	Deb1	Mus musculus differentially expressed in B16F10 1 (Deb1), mRNA [NM_026794]		NM_026794	Mm.24848	26901	ENSMUST00000068330	TC1603490
A_52_P67463	0.000408847	2.99493	down	327.704	226.848	3.14672	1.5642	315.495	316.534	351.084	215.219	225.158	240.167	3.00079	3.00778	3.4316	1.52785	1.53877	1.62598	AK140938	chr7:80684767-80684708	1810026B05Rik	Mus musculus 16 days embryo head cDNA, RIKEN full-length enriched library, clone:C130076G01 product:unclassifiable, full insert sequence. [AK140938]	GO:0008150|GO:0003674|GO:0005575		Mm.34539	69170		NP743795
A_51_P233153	0.000103952	3.81779	down	1428.35	778.603	5.27219	3.33946	1394.94	1438.68	1451.43	686.55	812.606	836.652	5.14531	5.19209	5.47918	3.20141	3.39039	3.42657	NM_153163	chr6:23213379-23213320	Cadps2	Mus musculus Ca2+-dependent activator protein for secretion 2 (Cadps2), mRNA [NM_153163]	GO:0045211|GO:0005515|GO:0045921|GO:0015031|GO:0006810|GO:0008289|GO:0031410|GO:0046872|GO:0016020|GO:0030054|GO:0042734|GO:0006887|GO:0045202|GO:0008021|GO:0016023	NM_153163	Mm.478120	320405	ENSMUST00000115361	NP800577
A_52_P125324	0.0237232	1.54387	down	26.1133	35.0753	-0.513655	-1.1402	30.8624	24.9699	22.5075	41.6274	33.0314	30.5673	-0.352903	-0.656324	-0.531737	-0.842354	-1.23025	-1.348	NM_177306	chr10:51449470-51449529	Rfx6	Mus musculus regulatory factor X, 6 (Rfx6), transcript variant 2, mRNA [NM_177306]	GO:0005515|GO:0006350|GO:0008150|GO:0007275|GO:0030154|GO:0003309|GO:0006355|GO:0045449|GO:0050796|GO:0003311|GO:0005634|GO:0090104|GO:0042593|GO:0003674|GO:0003677|GO:0003310|GO:0005575	NM_177306	Mm.109190	320995	ENSMUST00000122922	TC1592271
A_51_P469951	0.000420004	2.12677	down	482.872	470.554	3.70557	2.61691	460.485	520.728	467.401	477.888	442.606	491.168	3.54633	3.72595	3.84444	2.67871	2.51386	2.65816	NM_080448	chr6:112668298-112668239	Srgap3	Mus musculus SLIT-ROBO Rho GTPase activating protein 3 (Srgap3), mRNA [NM_080448]	GO:0005515|GO:0008150|GO:0005096|GO:0007165|GO:0005575|GO:0005622	NM_080448	Mm.236401	259302	ENSMUST00000088373	TC1652574
A_51_P214449	0.0126992	1.55634	down	2873.02	3853.6	6.27927	5.64111	3030.38	2726.64	2862.03	3262.84	4414.2	3883.75	6.2646	6.11447	6.45875	5.4501	5.83192	5.64132	NM_023127	chr15:36105211-36106547	Polr2k	Mus musculus polymerase (RNA) II (DNA directed) polypeptide K (Polr2k), transcript variant 2, mRNA [NM_023127]	GO:0005634|GO:0046872|GO:0006350|GO:0003899|GO:0003677	NM_023127	Mm.27375	17749	ENSMUST00000057177	TC1579759
A_51_P370470	0.00325877	1.93111	down	539.147	579.08	3.86264	2.91321	579.855	484.116	553.469	535.264	558.834	643.141	3.87886	3.62077	4.08829	2.84229	2.85026	3.04708	NM_030013	chr1:60444156-60444215	Cyp20a1	Mus musculus cytochrome P450, family 20, subfamily A, polypeptide 1 (Cyp20a1), mRNA [NM_030013]	GO:0005506|GO:0009055|GO:0046872|GO:0016020|GO:0008150|GO:0003674|GO:0020037|GO:0016491|GO:0004497|GO:0016021|GO:0005575|GO:0055114	NM_030013	Mm.197640	77951	ENSMUST00000060608	TC1583606
A_52_P63680	0.000413474	2.61149	down	7905.68	6258.54	7.73632	6.35145	7129.87	8675.3	7911.88	6221.32	6415.18	6139.12	7.49898	7.78426	7.92573	6.38119	6.37125	6.3019	NM_175731	chr17:57093914-57093855	Acer1	Mus musculus alkaline ceramidase 1 (Acer1), mRNA [NM_175731]	GO:0017040|GO:0046514|GO:0006629|GO:0006665|GO:0016787|GO:0019216|GO:0016020|GO:0016021|GO:0005783	NM_175731	Mm.218784	171168	ENSMUST00000056113	TC1586644
A_51_P200776	0.000131768	2.11711	down	4235.47	4144.48	6.83894	5.75685	4510.97	4165.98	4029.45	4238.79	4125.3	4069.36	6.83854	6.726	6.95229	5.82762	5.73426	5.70867	NM_178700	chr5:89088971-89088912	Grsf1	Mus musculus G-rich RNA sequence binding factor 1 (Grsf1), transcript variant 1, mRNA [NM_178700]	GO:0003676|GO:0005737|GO:0005739|GO:0003723|GO:0000166|GO:0016331|GO:0009952	NM_178700	Mm.332474	231413	ENSMUST00000113234	TC1572006
A_52_P525307	0.0369785	2.1893	down	72.7906	72.4213	0.966553	-0.163915	85.2849	63.1258	69.961	42.7238	98.431	76.1093	1.11354	0.681716	1.10441	-0.804848	0.34502	-0.0319161	BC031426	chr12:113041390-113041449		Mus musculus, clone IMAGE:4010479, mRNA, partial cds. [BC031426]			Mm.444858			TC1699974
A_51_P131164	0.000736407	3.07783	down	51.3709	34.9914	0.471036	-1.15088	56.6008	50.3064	47.2056	32.0975	43.2971	29.5795	0.522068	0.354228	0.536812	-1.21743	-0.839821	-1.39539	NM_027728	chr2:21102467-21102408	Enkur	Mus musculus enkurin, TRPC channel interacting protein (Enkur), mRNA [NM_027728]	GO:0005929|GO:0042995|GO:0019861|GO:0017124|GO:0005516	NM_027728	Mm.27658	71233	ENSMUST00000027992	TC1585153
A_52_P414485	0.000542777	1.64325	down	260.208	325.044	2.80107	2.08452	300.818	267.308	212.499	325.149	328.469	321.515	2.93206	2.76392	2.70724	2.12314	2.08359	2.04682	NM_008999	chr1:33799261-33799320	Rab23	Mus musculus RAB23, member RAS oncogene family (Rab23), transcript variant 1, mRNA [NM_008999]	GO:0007399|GO:0005886|GO:0007264|GO:0015031|GO:0042733|GO:0005525|GO:0000166|GO:0007165|GO:0006810|GO:0008589|GO:0021513|GO:0016020|GO:0045861	NM_008999	Mm.86744	19335	ENSMUST00000088287
A_52_P104108	0.00321266	2.4052	down	1336.01	1174.03	5.17432	3.90816	1418.63	1327.43	1261.95	861.748	1375.6	1284.74	5.1696	5.07598	5.27737	3.52931	4.14982	4.04534	NM_001024539	chr10:79081855-79081796	Shc2	Mus musculus SHC (Src homology 2 domain containing) transforming protein 2 (Shc2), mRNA [NM_001024539]	GO:0005515	NM_001024539	Mm.39424	216148		TC1622143
A_52_P795929	0.00436808	2.62596	down	87.2599	66.23	1.17929	-0.213552	121.822	79.1951	60.7621	69.886	60.2853	68.5188	1.62795	1.0089	0.901027	-0.0948825	-0.362285	-0.183488	AK081614	chr6:93193784-93193843		Mus musculus 16 days embryo head cDNA, RIKEN full-length enriched library, clone:C130051K14 product:unclassifiable, full insert sequence. [AK081614]			Mm.126896
A_52_P674414	0.000693321	1.57426	down	734.863	967.826	4.31223	3.65755	777.855	726.4	700.334	923.775	962.193	1017.51	4.30267	4.20618	4.42783	3.62958	3.63416	3.70891	NM_013791	chr6:31442653-31442712	Mkln1	Mus musculus muskelin 1, intracellular mediator containing kelch motifs (Mkln1), mRNA [NM_013791]	GO:0005737	NM_013791	Mm.238038	27418	ENSMUST00000130108	TC1574518
A_51_P180413	0.000641582	1.77482	down	46.0982	53.7499	0.313212	-0.514462	51.0121	46.2515	41.0309	56.48	49.1651	55.6047	0.372085	0.232987	0.334564	-0.402147	-0.656457	-0.484781	NM_176930	chr12:45699579-45699638	Nrcam	Mus musculus neuron-glia-CAM-related cell adhesion molecule (Nrcam), transcript variant 1, mRNA [NM_176930]	GO:0005515|GO:0019227|GO:0016020|GO:0007155|GO:0016337|GO:0007417|GO:0005886|GO:0045202|GO:0008104|GO:0007411|GO:0030424|GO:0016021	NM_176930	Mm.208439	319504	ENSMUST00000110751	TC1578008
A_51_P473043	0.000603316	3.47561	down	2736.58	1636.53	6.20681	4.40954	2602.8	2592.12	3014.82	1416.71	1718.63	1774.27	6.04516	6.04148	6.53378	4.24651	4.47102	4.51109	NM_025800	chr16:31251632-31251603	Ppp1r2	Mus musculus protein phosphatase 1, regulatory (inhibitor) subunit 2 (Ppp1r2), mRNA [NM_025800]	GO:0005975|GO:0005977|GO:0004864	NM_025800	Mm.291593	66849	ENSMUST00000060188	TC1591555
A_52_P305182	0.000426921	2.72618	down	2431.65	1850.1	6.03776	4.59088	2536.15	2243.7	2515.09	1698.2	1951.13	1900.95	6.00774	5.83322	6.27232	4.50798	4.65407	4.61059	NM_199310	chr2:118844045-118843986	Ccdc32	Mus musculus coiled-coil domain containing 32 (Ccdc32), mRNA [NM_199310]	GO:0008150|GO:0003674|GO:0005575	NM_199310	Mm.292465	269336	ENSMUST00000036470	TC1577858
A_51_P320386	0.0363151	1.9367	down	699.012	739.68	4.21363	3.26003	592.548	604.427	900.06	617.535	821.371	780.134	3.91011	3.94098	4.7898	3.04856	3.40587	3.32566	NM_001025309	chr17:64632299-64632240	Pja2	Mus musculus praja 2, RING-H2 motif containing (Pja2), transcript variant 1, mRNA [NM_001025309]	GO:0045211|GO:0005515|GO:0046872|GO:0016020|GO:0030054|GO:0005886|GO:0045202|GO:0005737|GO:0008270|GO:0005783|GO:0016874|GO:0005794	NM_001025309	Mm.478022	224938		TC1572614
A_52_P636482	0.0216087	2.00549	down	8353.22	8514.24	7.79716	6.79321	7608.08	6953.52	10498.1	7855.26	9071.37	8616.07	7.59263	7.46509	8.33376	6.71763	6.87108	6.7909	NM_182650	chr6:51411396-51411337	Hnrnpa2b1	Mus musculus heterogeneous nuclear ribonucleoprotein A2/B1 (Hnrnpa2b1), transcript variant 2, mRNA [NM_182650]	GO:0003676|GO:0005634|GO:0005515|GO:0005681|GO:0008380|GO:0005737|GO:0003723|GO:0030529|GO:0006397|GO:0000166	NM_182650	Mm.155896	53379	ENSMUST00000116609	TC1675894
A_52_P608132	0.00356964	2.31583	down	210.345	187.013	2.49332	1.28179	251.277	175.901	203.856	210.052	176.084	174.903	2.67245	2.16018	2.64733	1.49279	1.1841	1.1685	NM_001024560	chr19:5495399-5495340	Snx32	Mus musculus sorting nexin 32 (Snx32), mRNA [NM_001024560]	GO:0005515|GO:0008150|GO:0003674|GO:0015031|GO:0035091|GO:0007154|GO:0005575|GO:0006810	NM_001024560	Mm.20071	225861	ENSMUST00000070172	TC1606435
A_51_P176549	0.00132009	1.84216	down	1482.93	1668.93	5.32551	4.44411	1535.43	1407.59	1505.78	1597.26	1711.09	1698.44	5.28374	5.16057	5.53222	4.41957	4.46468	4.44808	NM_019774	chr17:32442141-32442082	Akap8	Mus musculus A kinase (PRKA) anchor protein 8 (Akap8), mRNA [NM_019774]	GO:0005515|GO:0005739|GO:0034237|GO:0003690|GO:0016363|GO:0000790|GO:0000793|GO:0005634|GO:0046872|GO:0007076|GO:0003677|GO:0016301|GO:0003682|GO:0008270|GO:0001939|GO:0005622|GO:0005794	NM_019774	Mm.328945	56399	ENSMUST00000002699	TC1602696
A_51_P470724	2.84525e-05	2.87261	down	10039.8	7195.35	8.07365	6.55128	10264.8	11478.2	8376.4	6911.38	7685.05	6989.6	8.02473	8.18816	8.00804	6.53294	6.63182	6.48908	NM_026030	chr2:154697212-154697153	Eif2s2	Mus musculus eukaryotic translation initiation factor 2, subunit 2 (beta) (Eif2s2), mRNA [NM_026030]	GO:0046872|GO:0003743|GO:0006412|GO:0006413	NM_026030	Mm.377134	67204	ENSMUST00000099173	TC1605135
A_51_P347177	9.875e-05	2.61464	down	8493.83	6740.26	7.84404	6.45743	8784.41	8313.4	8383.69	6350.75	6974.14	6895.9	7.80005	7.72278	8.00929	6.4109	6.49178	6.46961	NM_026386	chr18:53380185-53380244	Snx2	Mus musculus sorting nexin 2 (Snx2), mRNA [NM_026386]	GO:0008565|GO:0006886|GO:0005515|GO:0015031|GO:0035091|GO:0007154|GO:0006810	NM_026386	Mm.252171	67804	ENSMUST00000037850	TC1573531
A_51_P338600	0.00334829	1.58558	down	4328.35	5681.32	6.86675	6.20174	4489.36	4663.46	3832.23	4750.3	6101.69	6191.97	6.83161	6.88874	6.8799	5.99199	6.29897	6.31427	NM_025387	chr13:41117584-41117643	Tmem14c	Mus musculus transmembrane protein 14C (Tmem14c), mRNA [NM_025387]	GO:0016020|GO:0008150|GO:0003674|GO:0005739|GO:0006783|GO:0016021	NM_025387	Mm.30005	66154	ENSMUST00000021790	TC1710982
A_52_P242724	1.15741e-05	2.56037	down	3688.51	2986.36	6.63782	5.28147	3890.58	3830.25	3344.71	2728.04	3107.07	3123.98	6.62509	6.60478	6.68359	5.19183	5.32532	5.32725	XM_001477204	chr16:29654447-29654506	LOC100046998	PREDICTED: Mus musculus similar to optic atrophy 1 (autosomal dominant) (LOC100046998), mRNA [XM_001477204]		XM_001477204	Mm.274285	100046998		TC1613699
A_51_P360655	0.0121831	1.93989	down	49.6316	53.4137	0.418148	-0.537829	43.7734	55.9922	49.1291	63.6323	43.6274	52.9813	0.151299	0.508711	0.594433	-0.230126	-0.828856	-0.554504	NM_008766	chr19:8700868-8700927	Slc22a6	Mus musculus solute carrier family 22 (organic anion transporter), member 6 (Slc22a6), mRNA [NM_008766]	GO:0005515|GO:0008514|GO:0005886|GO:0005901|GO:0006820|GO:0043234|GO:0015075|GO:0015711|GO:0005887|GO:0016020|GO:0005624|GO:0043252|GO:0006811|GO:0015347|GO:0016021	NM_008766	Mm.30090	18399	ENSMUST00000010250	TC1577678
A_52_P484903	0.00730141	2.32838	down	1573.62	1409.49	5.40395	4.18462	1423.51	1484.51	1812.86	1123.59	1591.43	1513.44	5.17455	5.23733	5.79997	3.91209	4.36008	4.2817	NM_008037	chr5:32459624-32459683	Fosl2	Mus musculus fos-like antigen 2 (Fosl2), mRNA [NM_008037]	GO:0032355|GO:0005634|GO:0043565|GO:0003700|GO:0003677|GO:0001666|GO:0045941|GO:0048146|GO:0046983|GO:0006355|GO:0003690|GO:0006366	NM_008037	Mm.24684	14284		TC1620210
A_51_P300806	0.000644166	2.09399	down	459.23	456.204	3.63154	2.56528	449.491	504.389	423.809	389.294	497.675	481.644	3.51146	3.67995	3.7032	2.3829	2.68304	2.62991	NM_021297	chr4:66503724-66503782	Tlr4	Mus musculus toll-like receptor 4 (Tlr4), mRNA [NM_021297]	GO:0045471|GO:0050829|GO:0004888|GO:0006954|GO:0031224|GO:0070430|GO:0032715|GO:0032707|GO:0050729|GO:0045429|GO:0016020|GO:0030890|GO:0060907|GO:0032700|GO:0070542|GO:0007250|GO:0004872|GO:0045368|GO:0009986|GO:0071223|GO:0007165|GO:0043065|GO:0050671|GO:0043123|GO:0032609|GO:0045359|GO:0032729|GO:0052033|GO:0005737|GO:0045087|GO:0045410|GO:0050731|GO:0042116|GO:0010572|GO:0002224|GO:0001530|GO:…	NM_021297	Mm.38049	21898	ENSMUST00000048096	TC1581907
A_51_P116157	0.00220509	2.50551	down	196.445	162.682	2.40537	1.08026	184.743	184.881	219.711	143.386	167.198	177.462	2.22869	2.23201	2.75539	0.941942	1.10939	1.18945		chr3:033964306-033964365
A_52_P552017	1.77685e-06	2.2636	down	737.131	672.402	4.31082	3.1322	801.763	773.024	636.607	637.938	679.884	699.383	4.34635	4.29593	4.29019	3.09546	3.13312	3.16802	NM_030081	chr6:92136968-92136909	Zfyve20	Mus musculus zinc finger, FYVE domain containing 20 (Zfyve20), mRNA [NM_030081]	GO:0046872|GO:0016020|GO:0008150|GO:0003674|GO:0015031|GO:0005886|GO:0008270|GO:0005768|GO:0005575|GO:0006810|GO:0005622	NM_030081	Mm.290734	78287	ENSMUST00000014694
A_52_P27249	0.0136418	2.49498	down	350.04	289.895	3.19202	1.87299	424.522	397.041	228.558	195.975	361.551	312.158	3.42901	3.3347	2.81234	1.39271	2.22203	2.00422	XM_001475631	chr17:6814956-6815015	Dynlt1d	PREDICTED: Mus musculus similar to tctex-1 protein, transcript variant 3 (LOC100040603), mRNA [XM_001475631]	GO:0008150|GO:0003674|GO:0005575	XM_001475631	Mm.457987	100040603		TC1609622
A_52_P568805	0.000152442	1.54972	down	17279.1	23023.8	8.86202	8.23001	19268	17425.9	15143.2	21892.9	23772.7	23405.9	8.93324	8.79051	8.86231	8.19636	8.261	8.23267	NM_146093	chr19:8950075-8950134	Ubxn1	Mus musculus UBX domain protein 1 (Ubxn1), mRNA [NM_146093]	GO:0005515|GO:0008150|GO:0005737|GO:0005575	NM_146093	Mm.27839	225896	ENSMUST00000096255	TC1575467
A_52_P594917	1.95589e-05	2.29474	down	8936.14	8038.83	7.91059	6.71226	9706.43	9376.33	7725.65	8366.92	7875.07	7874.51	7.94404	7.89637	7.89137	6.80867	6.66706	6.66106	NM_054097	chr10:126634345-126634286	Pip4k2c	Mus musculus phosphatidylinositol-5-phosphate 4-kinase, type II, gamma (Pip4k2c), mRNA [NM_054097]	GO:0016309|GO:0016020|GO:0008150|GO:0016307|GO:0005524|GO:0016740|GO:0016301|GO:0005737|GO:0046488|GO:0016308|GO:0000166|GO:0005783	NM_054097	Mm.22682	117150	ENSMUST00000013970	TC1572449
A_51_P264139	0.00790091	1.87774	down	57.7876	64.1644	0.642392	-0.266607	54.6466	56.0707	62.6455	54.152	65.9206	72.4207	0.471378	0.510735	0.945065	-0.462872	-0.233363	-0.103587		chr12:93044637-93044696								TC1632995
A_52_P799815	0.00104497	2.40445	down	10581.7	9119.99	8.15791	6.8922	9615.08	11431	10699	9908.28	8619.15	8832.54	7.9304	8.18222	8.36111	7.0526	6.79731	6.8267	NM_001025606	chr13:99456414-99456355	Tmem171	Mus musculus transmembrane protein 171 (Tmem171), mRNA [NM_001025606]	GO:0016020|GO:0008150|GO:0003674|GO:0016021|GO:0005575	NM_001025606	Mm.28264	380863	ENSMUST00000064347	TC1585898
A_51_P123039	0.0489945	1.98419	down	183.994	178.031	2.19876	1.21021	216.267	242.66	93.0555	159.495	198.731	175.866	2.45599	2.62435	1.51595	1.09556	1.35865	1.17642	NM_019928	chr7:51140986-51141045	Klk4	Mus musculus kallikrein related-peptidase 4 (prostase, enamel matrix, prostate) (Klk4), mRNA [NM_019928]	GO:0016787|GO:0008150|GO:0003674|GO:0008236|GO:0008233|GO:0005575	NM_019928	Mm.42080	56640	ENSMUST00000007161	TC1589874
A_52_P336792	0.00541664	1.64609	down	42.9812	53.9349	0.211251	-0.507793	48.6532	38.7183	41.5721	56.7025	53.2617	51.8404	0.303781	-0.0234981	0.353468	-0.396474	-0.540995	-0.58591		chr11:90509750-90509809
A_52_P680495	0.000123124	2.66266	down	7704.46	6005.57	7.70321	6.29034	7766.66	7923.5	7423.22	6428.08	5720.92	5867.71	7.6224	7.65348	7.83376	6.42836	6.20601	6.23667	NM_019745	chr3:75321338-75321279	Pdcd10	Mus musculus programmed cell death 10 (Pdcd10), mRNA [NM_019745]	GO:0008150|GO:0003674|GO:0006915|GO:0005575	NM_019745	Mm.316473	56426	ENSMUST00000029424	TC1574448
A_51_P204860	0.000503932	2.2349	down	1015.86	947.486	4.78035	3.62014	1041.8	1022	983.789	814.915	982.5	1045.04	4.72418	4.69874	4.91813	3.44869	3.66429	3.74743	NM_026221	chr6:146980247-146980306	Ppfibp1	Mus musculus PTPRF interacting protein, binding protein 1 (liprin beta 1) (Ppfibp1), transcript variant 2, mRNA [NM_026221]	GO:0008150|GO:0003674|GO:0005575	NM_026221	Mm.103382	67533	ENSMUST00000016631	TC1621671
A_51_P429241	0.00013641	2.6396	down	335.972	263.066	3.17914	1.77882	316.965	377.494	313.458	272.112	262.634	254.452	3.0075	3.26187	3.26805	1.86624	1.76089	1.70933	XM_001474655	chr13:19396934-19396875		PREDICTED: Mus musculus T cell receptor gamma chain (Tcrg), mRNA [XM_001474655]		XM_001474655	Mm.211738			NP1216409
A_52_P169087	0.0199704	1.73417	down	491.713	584.359	3.72385	2.92961	458.497	441.414	575.228	551.519	605.102	596.454	3.54009	3.48755	4.14392	2.88545	2.96502	2.93835	AK008281	chr3:106286239-106286298		Mus musculus adult male small intestine cDNA, RIKEN full-length enriched library, clone:2010016I18 product:unclassifiable, full insert sequence. [AK008281]						TC1601333
A_51_P212183	0.0240085	1.58919	down	3903.49	5151.64	6.72187	6.05358	3920.43	3723.03	4067.02	4104.59	5951.76	5398.58	6.63611	6.56382	6.96568	5.78121	6.26308	6.11645	NM_025849	chr4:74923429-74923370	3110001D03Rik	Mus musculus RIKEN cDNA 3110001D03 gene (3110001D03Rik), mRNA [NM_025849]	GO:0016020|GO:0008150|GO:0003674|GO:0016021|GO:0005575	NM_025849	Mm.24332	66928	ENSMUST00000030103	TC1578917
A_51_P432892	0.063261	2.79135	down	4711.04	4034.63	6.99225	5.51129	5041.45	4613.67	4477.99	1536.25	5632.92	4934.73	6.99894	6.87326	7.10456	4.36338	6.18365	5.98684		chr12:82051356-82051414
A_51_P331288	0.000156377	3.13443	down	587.135	386.864	3.98328	2.33507	534.998	666.184	560.222	395.459	370.048	395.085	3.76271	4.08134	4.10578	2.40557	2.25555	2.3441	NM_009731	chr6:34372905-34372964	Akr1b7	Mus musculus aldo-keto reductase family 1, member B7 (Akr1b7), mRNA [NM_009731]	GO:0005737|GO:0005739|GO:0016491|GO:0044255|GO:0004032|GO:0055114	NM_009731	Mm.5378	11997	ENSMUST00000007449	TC1583253
A_52_P147089	0.0337024	2.11764	down	134.52	130.581	1.83108	0.748621	96.408	151.476	155.678	154.408	102.639	134.696	1.2904	1.9445	2.25834	1.04879	0.40542	0.791651	BC038268	chr13:55516507-55516566	BC038268	Mus musculus profilin 3, mRNA (cDNA clone IMAGE:4223261), partial cds. [BC038268]	GO:0008150|GO:0003674|GO:0005575		Mm.276355	100038756		TC1618427
A_51_P100034	1.93907e-05	2.60922	down	2543.99	2020.96	6.10399	4.72038	2659.55	2559.4	2413.02	1955.03	2089.47	2018.39	6.07628	6.02315	6.21255	4.71116	4.7529	4.69707	NM_027162	chr11:115469328-115469269	Mif4gd	Mus musculus MIF4G domain containing (Mif4gd), transcript variant 1, mRNA [NM_027162]	GO:0016070|GO:0005634|GO:0005515|GO:0008150|GO:0006417|GO:0003674|GO:0005737|GO:0005488|GO:0005575	NM_027162	Mm.390387	69674	ENSMUST00000106507	TC1577965
A_52_P282700	0.000426883	3.76164	down	1524.82	841.202	5.36271	3.45135	1490.17	1405.44	1678.87	744.19	882.21	897.206	5.24058	5.15836	5.6892	3.31771	3.50896	3.52738	NM_020256	chrX:35549874-35549933	Zbtb33	Mus musculus zinc finger and BTB domain containing 33 (Zbtb33), transcript variant 1, mRNA [NM_020256]	GO:0005634|GO:0005515|GO:0046872|GO:0006350|GO:0003677|GO:0008270|GO:0016055|GO:0045449|GO:0005622	NM_020256	Mm.391248	56805	ENSMUST00000049740	TC1603458
A_51_P325836	0.0334657	2.36119	down	49.8445	42.8915	0.378342	-0.861175	32.3753	61.3483	55.81	50.1062	32.5957	45.9725	-0.283861	0.640509	0.778379	-0.574896	-1.24941	-0.759216	NM_017371	chr7:112740363-112740304	Hpx	Mus musculus hemopexin (Hpx), mRNA [NM_017371]	GO:0060335|GO:0005576|GO:0020027|GO:0002639|GO:0042168|GO:0006810|GO:0046872|GO:0060332|GO:0042511|GO:0051246|GO:0020037|GO:0002925|GO:0005575	NM_017371	Mm.3485	15458	ENSMUST00000033185	TC1771439
A_51_P293781	0.000737322	1.83756	down	430.963	482.845	3.53294	2.65515	504.643	409.153	379.093	489.613	490.965	467.957	3.67844	3.37805	3.54233	2.71368	2.66346	2.58832	NM_016863	chr12:4840163-4840104	Fkbp1b	Mus musculus FK506 binding protein 1b (Fkbp1b), mRNA [NM_016863]	GO:0005792|GO:0042098|GO:0005515|GO:0006939|GO:0051209|GO:0002027|GO:0016853|GO:0003755|GO:0007204|GO:0014808|GO:0033017|GO:0010459|GO:0060314|GO:0019227|GO:0030073|GO:0010881|GO:0006457|GO:0005528|GO:0009749	NM_016863	Mm.20453	14226	ENSMUST00000020964	TC1584601
A_52_P674418	0.000950767	1.79548	down	55.155	63.6672	0.568651	-0.27572	58.7456	60.0141	46.7052	56.2208	61.964	72.8168	0.575725	0.608788	0.521439	-0.408782	-0.322661	-0.0957174	NM_175128	chr10:100039820-100038487	4930430F08Rik	Mus musculus RIKEN cDNA 4930430F08 gene (4930430F08Rik), mRNA [NM_175128]	GO:0008150|GO:0003674|GO:0005575	NM_175128	Mm.268474	68281	ENSMUST00000054471	NP742482
A_51_P149455	0.000373507	2.32888	down	4268.36	3806.66	6.85154	5.63191	4170.35	4314.41	4320.31	3495.26	3952.82	3971.91	6.72527	6.77651	7.05284	5.54937	5.67265	5.6737	NM_007381	chr1:66877732-66877673	Acadl	Mus musculus acyl-Coenzyme A dehydrogenase, long-chain (Acadl), nuclear gene encoding mitochondrial protein, mRNA [NM_007381]	GO:0046322|GO:0045717|GO:0005739|GO:0019254|GO:0016491|GO:0016401|GO:0044242|GO:0001659|GO:0003995|GO:0006629|GO:0006631|GO:0008152|GO:0033539|GO:0042413|GO:0016627|GO:0004466|GO:0055114|GO:0050660	NM_007381	Mm.2445	11363	ENSMUST00000027153	TC1573592
A_51_P242663	0.000521503	2.43285	down	829.62	708.278	4.48736	3.20472	782.762	860.438	845.658	646.342	711.207	767.284	4.31175	4.45048	4.69986	3.11434	3.1981	3.3017	NM_011484	chr2:14068753-14068812	Stam	Mus musculus signal transducing adaptor molecule (SH3 domain and ITAM motif) 1 (Stam), mRNA [NM_011484]	GO:0006886|GO:0005515|GO:0016020|GO:0015031|GO:0005737|GO:0005768|GO:0006810	NM_011484	Mm.273174	20844	ENSMUST00000114738	TC1575278
A_51_P176337	0.000310206	2.43361	down	63.8525	54.5432	0.785955	-0.497142	64.4273	68.5392	58.5909	54.7862	60.7496	48.0939	0.708917	0.800416	0.848531	-0.446074	-0.351218	-0.694134	NM_009233	chr8:12397120-12397179	Sox1	Mus musculus SRY-box containing gene 1 (Sox1), mRNA [NM_009233]	GO:0021879|GO:0005634|GO:0043565|GO:0006350|GO:0002089|GO:0001764|GO:0003677|GO:0030900|GO:0021884|GO:0045449	NM_009233	Mm.39088	20664	ENSMUST00000116111	TC1588707
A_52_P668393	4.05114e-05	2.55269	down	681.909	550.919	4.19646	2.84444	780.085	674.309	591.332	526.134	583.155	543.469	4.3068	4.09882	4.18375	2.81747	2.91172	2.80414	AK028994	chr15:76474213-76474154	Cyhr1	Mus musculus 10 days neonate skin cDNA, RIKEN full-length enriched library, clone:4732479H09 product:cysteine and histidine rich 1, full insert sequence. [AK028994]	GO:0005515|GO:0046872|GO:0008150|GO:0005635|GO:0005737|GO:0008270		Mm.247752	54151		TC1601014
A_51_P404825	0.00336949	2.25087	down	4424.12	4064.76	6.89827	5.72778	4156.93	4151.7	4963.72	4305.41	3922.89	3965.96	6.72062	6.72104	7.25313	5.85012	5.66168	5.67154	NM_198645	chr16:36092065-36092123	Ccdc58	Mus musculus coiled-coil domain containing 58 (Ccdc58), transcript variant 1, mRNA [NM_198645]	GO:0008150|GO:0003674|GO:0005739	NM_198645	Mm.310434	381045	ENSMUST00000099937	TC1578786
A_51_P212666	0.0649701	1.5787	down	29.6412	39.4521	-0.325703	-0.984438	25.7188	32.9388	30.2659	50.0599	36.4589	31.8375	-0.615931	-0.256725	-0.104454	-0.57623	-1.08782	-1.28926	NM_018766	chr2:180279368-180279427	Ntsr1	Mus musculus neurotensin receptor 1 (Ntsr1), mRNA [NM_018766]	GO:0004872|GO:0016020|GO:0004930|GO:0005886|GO:0016492|GO:0007186|GO:0004871|GO:0008344|GO:0016021|GO:0008188|GO:0007165	NM_018766	Mm.301712	18216	ENSMUST00000029084	TC1589274
A_52_P274555	9.41668e-06	2.17686	down	2167.13	2062.15	5.87106	4.74881	2291.73	2226.14	1983.51	1947.5	2143.58	2095.35	5.86154	5.82189	5.92977	4.7056	4.78979	4.75106	NM_172926	chr9:88276701-88276642	Snx14	Mus musculus sorting nexin 14 (Snx14), mRNA [NM_172926]	GO:0005515|GO:0016020|GO:0008150|GO:0003674|GO:0015031|GO:0004871|GO:0035091|GO:0016021|GO:0007154|GO:0005575|GO:0006810	NM_172926	Mm.439873	244962	ENSMUST00000126405	TC1575929
A_52_P291509	0.000636742	2.04091	down	1222.09	1241.65	5.04727	4.01806	1216.25	1205.27	1244.76	1232.81	1234.28	1257.86	4.94754	4.9367	5.25758	4.04592	3.99343	4.01483	BC016231	chr13:101230319-101230260	Gtf2h2	Mus musculus general transcription factor II H, polypeptide 2, mRNA (cDNA clone MGC:28787 IMAGE:4488798), complete cds. [BC016231]			Mm.272533	23894		TC1588773
A_52_P95348	0.00362778	1.86413	down	95.9761	107.023	1.37452	0.476019	88.4174	100.755	98.7555	94.4526	117.442	109.174	1.16558	1.35627	1.60172	0.339705	0.599787	0.488567	AK082565	chr4:61979920-61979861		FK506 binding protein 15 Gene [Source:MGI Symbol;Acc:MGI:2444782] [ENSMUST00000098033]			Mm.357792		ENSMUST00000098033	TC1598153
A_51_P291819	0.0120279	1.53321	down	1091.98	1443.79	4.85193	4.23538	1365.73	1104.03	806.186	1399.61	1458.83	1472.94	5.11477	4.81012	4.6309	4.22899	4.23457	4.24256	NM_024210	chr11:59024040-59024099	2310033P09Rik	Mus musculus RIKEN cDNA 2310033P09 gene (2310033P09Rik), mRNA [NM_024210]	GO:0008150|GO:0003674|GO:0005575	NM_024210	Mm.358708	67862	ENSMUST00000020719	TC1580185
A_51_P358225	0.00012322	3.14493	down	11206.3	7378.62	8.24202	6.58899	11954.1	10418.6	11246.2	7268.71	7301.45	7565.69	8.24453	8.04843	8.43308	6.60567	6.55795	6.60334	NM_019760	chr10:57235680-57235621	Serinc1	Mus musculus serine incorporator 1 (Serinc1), mRNA [NM_019760]	GO:0006629|GO:0016020|GO:0008150|GO:0003674|GO:0005886|GO:0016021|GO:0005783|GO:0008654	NM_019760	Mm.29344	56442	ENSMUST00000020027	TC1573746
A_52_P380329	0.0244217	1.5002	down	859.969	1155.76	4.49848	3.91333	1058.43	928.113	593.363	1087.9	1171.12	1208.27	4.74703	4.55972	4.1887	3.86552	3.91766	3.95681	NM_198600	chr13:69637186-69637127	Papd7	Mus musculus PAP associated domain containing 7 (Papd7), transcript variant 1, mRNA [NM_198600]	GO:0005634|GO:0008150|GO:0003674|GO:0007067|GO:0003677|GO:0016779|GO:0016740|GO:0006260|GO:0051301|GO:0007049|GO:0005575|GO:0003887	NM_198600	Mm.315959	210106	ENSMUST00000044081	TC1573062
A_52_P582261	0.00912404	1.63302	down	713.451	905.519	4.26878	3.56124	680.543	690.861	768.95	849.288	940.601	926.67	4.10986	4.13381	4.56267	3.50829	3.60142	3.574	NM_175115	chr7:138532829-138532770	Ikzf5	Mus musculus IKAROS family zinc finger 5 (Ikzf5), mRNA [NM_175115]	GO:0005634|GO:0046872|GO:0008150|GO:0006350|GO:0003674|GO:0003677|GO:0008270|GO:0005575|GO:0045449|GO:0005622	NM_175115	Mm.334273	67143	ENSMUST00000046306	TC1599148
A_51_P253481	0.0200916	2.29101	down	2987.57	2639.88	6.29986	5.10388	2766.11	2276	3920.6	2442.34	2661.48	2815.8	6.13296	5.85384	6.91279	5.03224	5.10199	5.17742	NM_021456	chr8:95826781-95826722	Ces1	Mus musculus carboxylesterase 1 (Ces1), mRNA [NM_021456]	GO:0016787|GO:0004091|GO:0005783	NM_021456	Mm.22720	12623	ENSMUST00000044602	TC1584507
A_51_P211810	0.00195531	3.11109	down	835.804	535.256	4.43942	2.802	988.524	994.507	524.382	572.186	533.288	500.293	4.64845	4.6594	4.0104	2.93853	2.78275	2.68471	NM_009089	chr11:69548162-69548103	Polr2a	Mus musculus polymerase (RNA) II (DNA directed) polypeptide A (Polr2a), mRNA [NM_009089]	GO:0005634|GO:0005515|GO:0005665|GO:0046872|GO:0006350|GO:0003899|GO:0003677|GO:0016779|GO:0016740|GO:0005730|GO:0006366	NM_009089	Mm.16533	20020	ENSMUST00000071213	TC1683606
A_51_P497152	0.000592631	1.81051	down	78.2536	89.6373	1.08194	0.225539	80.627	78.0875	76.0462	93.2081	88.1696	87.5342	1.03251	0.988578	1.22473	0.320569	0.186189	0.169859	NM_013518	chr14:58728424-58728483	Fgf9	Mus musculus fibroblast growth factor 9 (Fgf9), mRNA [NM_013518]	GO:0042472|GO:0030154|GO:0060484|GO:0005104|GO:0030238|GO:0008083|GO:0030324|GO:0050679|GO:0001525|GO:0006606|GO:0007267|GO:0008584|GO:0008284|GO:0010628|GO:0005576|GO:0060045|GO:0007275|GO:0005615|GO:0005604|GO:0008543|GO:0051781|GO:0001649|GO:0002062|GO:0090263|GO:0030178|GO:0048566|GO:0030949|GO:0045880|GO:0005737|GO:0030326|GO:0002053|GO:0048505|GO:0043410|GO:0008201|GO:0048706	NM_013518	Mm.8846	14180	ENSMUST00000022545	TC1589976
A_51_P370008	0.000473293	2.14057	down	676.434	655.477	4.19237	3.09437	722.346	645.015	661.942	639.688	705.037	621.705	4.19586	4.03475	4.34649	3.09941	3.18553	2.99817	NM_028236	chr7:50904196-50904255	Ceacam18	Mus musculus carcinoembryonic antigen-related cell adhesion molecule 18 (Ceacam18), mRNA [NM_028236]	GO:0016020|GO:0008150|GO:0003674|GO:0016021|GO:0005575	NM_028236	Mm.158821	72431	ENSMUST00000032663	TC1593294
A_51_P144052	0.0117855	1.63597	down	6089.57	7723.42	7.36202	6.65188	5814.84	5864.94	6588.92	7308.39	8463	7398.86	7.20484	7.21946	7.66175	6.61352	6.77093	6.57117	NM_172393	chr10:43670546-43670487	Aim1	Mus musculus absent in melanoma 1 (Aim1), mRNA [NM_172393]	GO:0008150|GO:0003674|GO:0005575	NM_172393	Mm.292082	11630	ENSMUST00000020017	TC1579041
A_51_P230624	0.00153775	2.11092	down	2759.08	2700.11	6.21251	5.13463	2458.7	3213.37	2605.17	2446.08	2952.89	2701.37	5.963	6.35143	6.32309	5.03444	5.25189	5.11756	NM_001162903	chr12:33065070-33065129	2010109K11Rik	Mus musculus RIKEN cDNA 2010109K11 gene (2010109K11Rik), mRNA [NM_001162903]	GO:0008150|GO:0003674|GO:0005575	NM_001162903	Mm.341352	72123	ENSMUST00000105165	TC1583748
A_52_P674467	0.00347094	2.1858	down	43.7724	41.8959	0.244174	-0.883985	43.7887	43.3523	44.1763	49.754	39.4772	36.4565	0.151804	0.139593	0.441127	-0.585073	-0.973072	-1.09381	NM_001039354	chr10:106857236-106857295	Lin7a	Mus musculus lin-7 homolog A (C. elegans) (Lin7a), transcript variant 1, mRNA [NM_001039354]	GO:0045211|GO:0005923|GO:0005515|GO:0005886|GO:0015031|GO:0030165|GO:0007269|GO:0048489|GO:0006810|GO:0016020|GO:0030054|GO:0006887|GO:0045202|GO:0019717|GO:0016323	NM_001039354	Mm.268025	108030	ENSMUST00000105280	TC1619226
A_52_P355324	0.00224746	1.64315	down	104.099	130.564	1.47831	0.761838	112.705	116.32	83.2711	113.014	138.994	139.685	1.51573	1.56352	1.35567	0.598546	0.842853	0.844116	NM_001081430	chr14:49807251-49807310	Naa30	Mus musculus N(alpha)-acetyltransferase 30, NatC catalytic subunit (Naa30), mRNA [NM_001081430]	GO:0008150|GO:0003674|GO:0008415|GO:0008152|GO:0016740|GO:0004596|GO:0005737|GO:0005575|GO:0008080	NM_001081430	Mm.479562	70646	ENSMUST00000136995	NP732238
A_51_P203620	0.00150782	3.19922	down	750.698	468.8	4.2875	2.60978	1011.31	735.327	505.462	427.985	476.786	501.63	4.68132	4.2238	3.95738	2.5196	2.62118	2.68856	NM_153054	chr8:71562110-71562051	Slc18a1	Mus musculus solute carrier family 18 (vesicular monoamine), member 1 (Slc18a1), mRNA [NM_153054]	GO:0015238|GO:0031410|GO:0016020|GO:0055085|GO:0006836|GO:0016021|GO:0006810|GO:0015893	NM_153054	Mm.19301	110877	ENSMUST00000037478	TC1582543
A_52_P939770	0.0687649	1.67233	down	115.045	140.037	1.60935	0.867484	92.8149	104.472	147.848	147.568	129.356	143.188	1.2356	1.40854	2.1839	0.983427	0.739178	0.879849	AK036777	chr9:123441667-123441726		Mus musculus adult female vagina cDNA, RIKEN full-length enriched library, clone:9930007F18 product:unclassifiable, full insert sequence. [AK036777]			Mm.273671
A_51_P439452	0.0018803	2.56603	down	4805.36	3889.65	7.01992	5.66039	4570.37	4613.92	5231.79	4361.41	3641.35	3666.21	6.85741	6.87334	7.32902	5.86876	5.55424	5.55816	NM_133748	chr1:123201144-123201085	Insig2	Mus musculus insulin induced gene 2 (Insig2), transcript variant 1, mRNA [NM_133748]	GO:0006991|GO:0042472|GO:0005515|GO:0045717|GO:0008203|GO:0060021|GO:0016126|GO:0042474|GO:0006629|GO:0008134|GO:0016020|GO:0008202|GO:0060363|GO:0006695|GO:0016021|GO:0005783|GO:0006641|GO:0010894	NM_133748	Mm.27136	72999	ENSMUST00000003818	TC1575448
A_51_P316673	0.00493269	2.84741	down	7420.84	5325.82	7.62518	6.11553	5588.25	8267.02	8407.25	5820.21	5209.03	4948.23	7.1475	7.71471	8.01334	6.28504	6.07078	5.99078	NM_144544	chr11:58421821-58421762	2210407C18Rik	Mus musculus RIKEN cDNA 2210407C18 gene (2210407C18Rik), mRNA [NM_144544]	GO:0008150|GO:0003674|GO:0005575	NM_144544	Mm.58038	78354	ENSMUST00000048801	TC1586262
A_52_P374825	0.0300941	1.55559	down	194.707	259.123	2.3899	1.75243	202.992	167.843	213.285	234.239	287.695	255.437	2.3646	2.09252	2.71257	1.65002	1.89237	1.7149	AK035652	chr6:134687608-134687549	Dusp16	Mus musculus adult male urinary bladder cDNA, RIKEN full-length enriched library, clone:9530081F05 product:dual specificity phosphatase 16, full insert sequence. [AK035652]	GO:0005634|GO:0005515|GO:0016787|GO:0000188|GO:0016301|GO:0005737|GO:0016791		Mm.479215	70686		TC1587731
A_51_P439966	0.00288667	2.71958	down	7809.64	5943.29	7.71384	6.27045	7370.56	6978.48	9079.86	5191.04	6545.66	6093.18	7.54688	7.47026	8.12438	6.11999	6.4003	6.29106	NM_010281	chr4:19992975-19993034	Ggh	Mus musculus gamma-glutamyl hydrolase (Ggh), mRNA [NM_010281]	GO:0005576|GO:0045471|GO:0005615|GO:0008233|GO:0010043|GO:0032868|GO:0003824|GO:0005764|GO:0042493|GO:0008242|GO:0016787|GO:0005829|GO:0006541|GO:0034722	NM_010281	Mm.20461	14590	ENSMUST00000029904	TC1578528
A_51_P232556	0.000369641	2.57702	down	568.272	457.627	3.94235	2.57665	556.424	562.65	585.741	447.948	486.478	438.455	3.81936	3.83765	4.17005	2.58537	2.65021	2.49437	NM_028721	chr9:103945804-103945863	Nphp3	Mus musculus nephronophthisis 3 (adolescent) (Nphp3), transcript variant 1, mRNA [NM_028721]	GO:0006629|GO:0003674|GO:0048496|GO:0005488|GO:0005575	NM_028721	Mm.479273	74025	ENSMUST00000035167	TC1588951
A_51_P221535	0.00466674	1.59311	down	4575.38	5952.34	6.9503	6.27845	4842.64	4307.72	4575.79	6241.35	5856.64	5759.02	6.9409	6.77427	7.13573	6.38583	6.23984	6.20969	NM_175287	chr4:153335898-153335957	A430005L14Rik	Mus musculus RIKEN cDNA A430005L14 gene (A430005L14Rik), transcript variant 1, mRNA [NM_175287]	GO:0008150|GO:0003674|GO:0005575	NM_175287	Mm.7066	97159	ENSMUST00000105645	TC1575724
A_51_P432449	0.00190424	2.22045	down	1268.8	1184.4	5.09861	3.94776	1250.31	1180.08	1376.02	1092.78	1217.34	1243.09	4.98739	4.90623	5.40221	3.87197	3.9735	3.9978	NM_009748	chr6:4027969-4027910	Bet1	Mus musculus blocked early in transport 1 homolog (S. cerevisiae) (Bet1), mRNA [NM_009748]	GO:0006888|GO:0016192|GO:0016020|GO:0003674|GO:0015031|GO:0000139|GO:0016021|GO:0006810|GO:0005783|GO:0005794	NM_009748	Mm.286457	12068	ENSMUST00000049166	TC1576912
A_52_P51192	0.0044395	1.75462	down	1495.7	1766.5	5.33724	4.52608	1459.5	1431.61	1595.99	1690.62	1808.88	1800	5.21057	5.18498	5.61616	4.50152	4.54486	4.53186	NM_145955	chr7:135841610-135841551	1110007A13Rik	Mus musculus RIKEN cDNA 1110007A13 gene (1110007A13Rik), mRNA [NM_145955]	GO:0008150|GO:0003674|GO:0005575	NM_145955	Mm.58882	210711	ENSMUST00000057557	TC1575054
A_51_P320626	0.00120065	1.51919	down	162.997	222.191	2.13619	1.53289	180.75	159.722	148.518	203.175	227.952	235.447	2.19717	2.02097	2.19042	1.44476	1.55657	1.59734	AK038228	chr6:125426523-125426464		Mus musculus 16 days neonate thymus cDNA, RIKEN full-length enriched library, clone:A130088F22 product:unclassifiable, full insert sequence. [AK038228]			Mm.446629			TC1620418
A_52_P600398	0.00206762	1.75369	down	16409.7	19415.8	8.79437	7.98397	16321.3	16165.6	16742.1	19160.3	20431	18656.1	8.69379	8.6822	9.00712	8.00402	8.04246	7.90544	NM_008828	chrX:103398789-103398848	Pgk1	Mus musculus phosphoglycerate kinase 1 (Pgk1), mRNA [NM_008828]	GO:0005829|GO:0004618|GO:0006096|GO:0005524|GO:0016740|GO:0006094|GO:0016301|GO:0005975|GO:0005737|GO:0000166|GO:0005625|GO:0043531	NM_008828	Mm.336205	18655	ENSMUST00000081593	TC1573707
A_51_P213870	4.21538e-05	4.04018	down	259.688	133.177	2.80724	0.792822	254.182	290.42	234.461	133.536	145.776	120.219	2.68904	2.88356	2.84913	0.83927	0.911589	0.627607	NM_024449	chr11:101828140-101828081	Sost	Mus musculus sclerostin (Sost), mRNA [NM_024449]	GO:0005576|GO:0005515|GO:0001503|GO:0005615|GO:0030514|GO:0016055|GO:0008201	NM_024449	Mm.265602	74499	ENSMUST00000001534	TC1590078
A_51_P404246	5.87503e-05	3.17888	down	554.556	362.072	3.90668	2.23816	569.966	564.439	529.262	389.434	351.637	345.146	3.85405	3.84223	4.02376	2.38342	2.18192	2.14915	NM_033478	chr17:35208581-35208522	Ly6g6d	Mus musculus lymphocyte antigen 6 complex, locus G6D (Ly6g6d), mRNA [NM_033478]	GO:0016020|GO:0008150|GO:0003674|GO:0005886|GO:0005575|GO:0031225	NM_033478	Mm.246697	114654	ENSMUST00000007259	NP1218623
A_52_P210123	0.00242258	2.20002	down	198.237	186.475	2.41925	1.28174	179.482	199.402	215.828	185.351	177.804	196.27	2.18701	2.34109	2.72966	1.3123	1.19812	1.33478	NM_028696	chr1:51527660-51527601	Obfc2a	Mus musculus oligonucleotide/oligosaccharide-binding fold containing 2A (Obfc2a), mRNA [NM_028696]	GO:0006974|GO:0003676|GO:0005634|GO:0008150|GO:0003677|GO:0003723|GO:0003697|GO:0006281	NM_028696	Mm.196290	109019	ENSMUST00000027279	TC1756320
A_51_P241715	0.000666765	1.92193	down	32.029	34.4695	-0.211637	-1.1542	30.6431	35.8896	29.5545	36.3339	32.4681	34.6064	-0.363193	-0.13295	-0.138767	-1.03857	-1.25507	-1.16895	XM_001473372	chr9:88508433-88508374		RIKEN cDNA 4930579C12 gene Gene [Source:MGI Symbol;Acc:MGI:2441687] [ENSMUST00000098484]		XM_001473372	Mm.425589		ENSMUST00000098484	TC1721901
A_52_P172441	0.0318543	1.5893	down	48.3577	63.8929	0.385304	-0.283085	51.1174	44.3713	49.5843	58.5776	53.7325	79.3686	0.375059	0.173114	0.607738	-0.349537	-0.528299	0.0285807	NM_173397	chr2:163294503-163294444	Fitm2	Mus musculus fat storage-inducing transmembrane protein 2 (Fitm2), mRNA [NM_173397]	GO:0016020|GO:0005739|GO:0016021|GO:0005783	NM_173397	Mm.242917	228859	ENSMUST00000109418	TC1580578
A_52_P575178	1.10215e-05	3.16959	down	956.218	619.262	4.67814	3.01385	1066.59	1034.55	767.509	593.318	632.051	632.418	4.75811	4.71635	4.55997	2.99085	3.02788	3.02282	NM_021339	chr9:35315141-35315200	Cdon	Mus musculus cell adhesion molecule-related/up-regulated by oncogenes (Cdon), mRNA [NM_021339]	GO:0016202|GO:0005515|GO:0009986|GO:0001708|GO:0007520|GO:0005887|GO:0007155|GO:0016020|GO:0016337|GO:0010172|GO:0007224|GO:0016021|GO:0045663|GO:0048598	NM_021339	Mm.80509	57810
A_51_P351948	0.00968126	2.19123	down	281.156	263.317	2.91195	1.78021	252.421	249.849	341.197	271.897	263.584	254.471	2.679	2.66647	3.39039	1.8651	1.7661	1.70944	AK046358	chr3:105529762-105529703		Mus musculus adult male corpora quadrigemina cDNA, RIKEN full-length enriched library, clone:B230374P19 product:unclassifiable, full insert sequence. [AK046358]			Mm.101922			TC1611295
A_51_P345393	2.9847e-06	2.73142	down	1483.07	1121.49	5.32065	3.871	1543.69	1606.24	1299.29	1135.4	1139.04	1090.03	5.29148	5.35103	5.31943	3.92717	3.87758	3.80823	NM_007987	chr19:34401902-34401961	Fas	Mus musculus Fas (TNF receptor sdownerfamily member 6) (Fas), transcript variant 1, mRNA [NM_007987]	GO:0045060|GO:0006925|GO:0004888|GO:0045637|GO:0043066|GO:0008625|GO:0005031|GO:0002377|GO:0003014|GO:0051260|GO:0016020|GO:0006927|GO:0050869|GO:0016021|GO:0045619|GO:0005576|GO:0005515|GO:0004872|GO:0006955|GO:0045121|GO:0051384|GO:0009986|GO:0019724|GO:0031104|GO:0006924|GO:0051789|GO:0007165|GO:0043029|GO:0048536|GO:0043065|GO:0042127|GO:0008624|GO:0009636|GO:0048471|GO:0010467|GO:0009897|GO:…	NM_007987	Mm.1626	14102	ENSMUST00000025691	TC1584266
A_52_P121110	0.00527229	2.91193	down	61.2256	44.1574	0.718207	-0.823769	52.8984	60.1485	70.6301	34.8724	56.1587	41.4412	0.424469	0.612014	1.11814	-1.0978	-0.464583	-0.908923	AK046580	chr9:57370444-57370503		Mus musculus 4 days neonate male adipose cDNA, RIKEN full-length enriched library, clone:B430108N21 product:similar to CYTOCHROME C OXIDASE POLYPEPTIDE VA, MITOCHONDRIAL PRECURSOR (EC 1.9.3.1) [Rattus norvegicus], full insert sequence. [AK046580]						TC1609591
A_51_P231440	0.0019218	2.22417	down	125.173	117.951	1.75991	0.606636	123.769	127.673	124.077	94.4869	130.61	128.756	1.65083	1.69787	1.93102	0.340228	0.753105	0.726574	NM_028263	chr19:36992307-36992248	Fgfbp3	Mus musculus fibroblast growth factor binding protein 3 (Fgfbp3), mRNA [NM_028263]	GO:0043117|GO:0005576|GO:0045743|GO:0019838|GO:0017134|GO:0008201	NM_028263	Mm.41674	72514	ENSMUST00000112415	TC1584959
A_52_P81210	0.00159117	3.49332	down	530.993	312.188	3.82933	2.02473	518.223	442.342	632.414	291.676	319.801	325.086	3.71675	3.49058	4.28065	1.96641	2.04501	2.06276	NM_007868	chrX:82449518-82449577	Dmd	Mus musculus dystrophin, muscular dystrophy (Dmd), mRNA [NM_007868]	GO:0048812|GO:0005886|GO:0042383|GO:0045213|GO:0045449|GO:0005634|GO:0046872|GO:0016020|GO:0030016|GO:0046716|GO:0005856|GO:0045202|GO:0050998|GO:0008270|GO:0016010|GO:0005792|GO:0005515|GO:0007517|GO:0030018|GO:0005626|GO:0030165|GO:0045121|GO:0005509|GO:0021629|GO:0030055|GO:0007519|GO:0005737|GO:0003779	NM_007868	Mm.275608	13405	ENSMUST00000113991	TC1601821
A_51_P259773	0.000769177	10.1719	down	2437.68	479.248	5.99089	2.64438	1876.98	2031.81	3404.27	493.814	473.568	470.361	5.57351	5.6901	6.70906	2.72601	2.61141	2.59571	NM_020258	chr9:37038112-37038053	Slc37a2	Mus musculus solute carrier family 37 (glycerol-3-phosphate transporter), member 2 (Slc37a2), transcript variant 2, mRNA [NM_020258]	GO:0016020|GO:0006072|GO:0015169|GO:0055085|GO:0006127|GO:0015794|GO:0016021|GO:0005575|GO:0006810|GO:0008643	NM_020258	Mm.440037	56857	ENSMUST00000115068	TC1590359
A_52_P329054	0.0063651	2.02911	down	690.401	708.154	4.21835	3.1975	714.904	610.828	745.471	595.018	794.094	735.35	4.18092	3.95618	4.51793	2.99498	3.35715	3.24037	NM_023873	chr9:99200687-99200746	Cep70	Mus musculus centrosomal protein 70 (Cep70), mRNA [NM_023873]	GO:0008150|GO:0003674|GO:0005856|GO:0005737|GO:0005575	NM_023873	Mm.288739	68121	ENSMUST00000093795	TC1581395
A_52_P503663	0.00574847	1.85734	down	2751.37	2987.79	6.17655	5.28332	3372.63	2982.91	1898.58	2803.45	3013.02	3146.91	6.41897	6.24406	5.86663	5.23118	5.28097	5.3378	NM_181748	chr19:38188370-38188429	Gpr120	Mus musculus G protein-codownled receptor 120 (Gpr120), mRNA [NM_181748]	GO:0008289|GO:0005504|GO:0004872|GO:0046879|GO:0016020|GO:0004930|GO:0030139|GO:0005886|GO:0007186|GO:0004871|GO:0016021|GO:0007165	NM_181748	Mm.35288	107221	ENSMUST00000067098	TC1584303
A_51_P449878	0.00386812	2.21997	down	17176.9	15965.1	8.85195	7.7014	14622.5	18254	18654.1	16917.1	15323.1	15655.1	8.53523	8.85748	9.16313	7.82438	7.6274	7.65243	NM_029600	chr11:94204730-94204671	Abcc3	Mus musculus ATP-binding cassette, sub-family C (CFTR/MRP), member 3 (Abcc3), mRNA [NM_029600]	GO:0005215|GO:0008559|GO:0005524|GO:0055085|GO:0016887|GO:0000166|GO:0006810|GO:0015238|GO:0006855|GO:0005887|GO:0016020|GO:0042626|GO:0015432|GO:0015722|GO:0017111|GO:0016021|GO:0016323|GO:0015893	NM_029600	Mm.23942	76408	ENSMUST00000021231	TC1581183
A_51_P520426	0.000800536	1.74966	down	749.548	883.281	4.33143	3.52436	839.784	780.682	628.178	955.415	834.774	859.653	4.41319	4.31015	4.27096	3.67817	3.42922	3.4657	NM_010280	chr18:34849620-34849561	Gfra3	Mus musculus glial cell line derived neurotrophic factor family receptor alpha 3 (Gfra3), mRNA [NM_010280]	GO:0004872|GO:0005515|GO:0015026|GO:0005886|GO:0048485|GO:0048666|GO:0016020|GO:0001764|GO:0007411|GO:0009897|GO:0008046|GO:0031225|GO:0007169	NM_010280	Mm.16520	14587	ENSMUST00000025224	TC1585053
A_51_P217682	0.00118935	1.8196	down	365.675	416.819	3.30633	2.44271	371.809	354.312	370.904	399.633	428.594	422.229	3.23773	3.17043	3.51083	2.42072	2.46745	2.43996	BC048838	chr7:99816974-99816915	Pcf11	Mus musculus cleavage and polyadenylation factor subunit homolog (S. cerevisiae), mRNA (cDNA clone IMAGE:4948470), complete cds. [BC048838]	GO:0008150|GO:0003674|GO:0005575		Mm.288645	74737		TC1581083
A_51_P189241	0.00737654	2.20464	down	49.7822	46.2105	0.410539	-0.730001	55.8624	38.7978	54.6862	45.2389	46.1191	47.2736	0.503124	-0.0205379	0.749032	-0.722321	-0.748729	-0.718953	NM_173406	chr6:52719600-52719541	Jazf1	Mus musculus JAZF zinc finger 1 (Jazf1), transcript variant 1, mRNA [NM_173406]	GO:0003676|GO:0005634|GO:0046872|GO:0006350|GO:0017053|GO:0008270|GO:0003714|GO:0000122|GO:0045449|GO:0005622	NM_173406	Mm.386865	231986	ENSMUST00000074541	TC1584308
A_52_P1045633	0.0725666	1.87102	down	64.9912	68.8347	0.735436	-0.168392	42.3235	94.2715	58.3787	78.7011	71.2664	56.5366	0.102704	1.26031	0.843296	0.076498	-0.12087	-0.460803	NM_001039198	chr14:55692360-55692301	Zfhx2	Mus musculus zinc finger homeobox 2 (Zfhx2), mRNA [NM_001039198]	GO:0005634|GO:0008150|GO:0003674|GO:0003677|GO:0005575	NM_001039198	Mm.441113	239102	ENSMUST00000036328	TC1612883
A_52_P307860	0.00203354	2.12422	down	46.4388	45.3279	0.326407	-0.760526	42.337	49.5126	47.4669	49.3623	42.5271	44.0945	0.103163	0.331283	0.544776	-0.596476	-0.865711	-0.81939	NM_201255	chr11:100049670-100048364	Krt9	Mus musculus keratin 9 (Krt9), mRNA [NM_201255]	GO:0045095|GO:0005882|GO:0048471|GO:0005198|GO:0007283	NM_201255	Mm.445335	107656	ENSMUST00000059707	TC1592655
A_51_P358574	2.5762e-05	3.19532	down	1800.52	1163.27	5.59797	3.92201	1988.52	1874.44	1538.59	1228.27	1180.48	1081.05	5.6568	5.5738	5.56332	4.0406	3.92913	3.7963	NM_133226	chr9:44055701-44055642	Pdzd3	Mus musculus PDZ domain containing 3 (Pdzd3), mRNA [NM_133226]	GO:0005515|GO:0016020|GO:0005737|GO:0005768|GO:0045177|GO:0005903	NM_133226	Mm.29872	170761	ENSMUST00000034618	TC1583795
A_51_P446131	0.00037861	2.33753	down	11814.6	10484.9	8.32037	7.09539	11655.8	11718.5	12069.4	10264.2	10236.2	10954.2	8.20808	8.21806	8.53499	7.10352	7.04537	7.13728	NM_016867	chr3:151765629-151757247	Gipc2	Mus musculus GIPC PDZ domain containing family, member 2 (Gipc2), mRNA [NM_016867]	GO:0005515|GO:0008150|GO:0005737|GO:0005575	NM_016867	Mm.97	54120	ENSMUST00000046614	TC1694920
A_51_P445417	0.000464777	2.8316	down	151.724	111.009	2.03576	0.534137	145.129	147.52	162.524	107.136	113.989	111.903	1.8805	1.90633	2.32043	0.521489	0.556729	0.524191	NM_030055	chr2:25144001-25144060	Tmem210	Mus musculus transmembrane protein 210 (Tmem210), mRNA [NM_030055]	GO:0016020|GO:0008150|GO:0003674|GO:0016021|GO:0005575	NM_030055	Mm.160057	78217	ENSMUST00000028340	TC1592062
A_52_P346774	0.00185053	1.68498	down	994.927	1228.06	4.75041	3.99768	1021.22	992.149	971.413	1129.31	1363.08	1191.8	4.69539	4.65597	4.89987	3.91941	4.13663	3.93701	AK053808	chr18:78013292-78013351		Mus musculus 0 day neonate eyeball cDNA, RIKEN full-length enriched library, clone:E130309L16 product:hypothetical Arginine-rich region containing protein, full insert sequence. [AK053808]			Mm.276137			TC1621961
A_51_P417725	0.00549632	2.05809	down	4683.67	4563.84	6.9371	5.8958	6060.49	4794.04	3196.47	4697.27	4520.7	4473.56	7.26454	6.92858	6.61819	5.97579	5.86631	5.84529	NM_008841	chr8:73292232-73292173	Pik3r2	Mus musculus phosphatidylinositol 3-kinase, regulatory subunit, polypeptide 2 (p85 beta) (Pik3r2), mRNA [NM_008841]	GO:0005515|GO:0016303|GO:0005942|GO:0008286|GO:0035014|GO:0016301|GO:0019987|GO:0007165|GO:0042325|GO:0005622	NM_008841	Mm.12945	18709	ENSMUST00000034296	TC1577167
A_51_P146953	0.00353926	1.93538	down	348.524	373.158	3.23502	2.2824	352.457	322.538	370.577	394.954	356.587	367.933	3.16062	3.03488	3.50956	2.40373	2.20209	2.24138	NM_133229	chr16:94558411-94558470	Ripply3	Mus musculus ripply3 homolog (zebrafish) (Ripply3), mRNA [NM_133229]	GO:0005634|GO:0008150|GO:0003674|GO:0005575	NM_133229	Mm.42604	170765	ENSMUST00000023660	TC1584917
A_51_P273843	0.00620815	2.05042	down	6620.16	6661.2	7.47716	6.44124	6089.76	6159.36	7611.37	6446.51	6716.13	6820.95	7.27149	7.29012	7.86987	6.43249	6.43739	6.45384	NM_025668	chr7:106987773-106987714	Spcs2	Mus musculus signal peptidase complex subunit 2 homolog (S. cerevisiae) (Spcs2), mRNA [NM_025668]	GO:0005792|GO:0016787|GO:0016020|GO:0008150|GO:0003674|GO:0006465|GO:0008233|GO:0005787|GO:0016021|GO:0005575|GO:0005783	NM_025668	Mm.30043	66624	ENSMUST00000036274	TC1571974
A_52_P1012802	0.000266139	3.1281	down	6629.03	4407.29	7.4863	5.84101	6439.42	6569.23	6878.45	3920.29	4734.97	4566.6	7.35203	7.38307	7.72379	5.71493	5.93312	5.87499	NM_008982	chr2:90273248-90273189	Ptprj	Mus musculus protein tyrosine phosphatase, receptor type, J (Ptprj), transcript variant 1, mRNA [NM_008982]	GO:0016311|GO:0016787|GO:0016020|GO:0004721|GO:0001570|GO:0016791|GO:0004725|GO:0007507|GO:0016021|GO:0006470	NM_008982	Mm.330393	19271	ENSMUST00000026352
A_51_P123077	0.000208309	1.63974	down	4159.71	5260.53	6.81325	6.09978	4281.1	4284.12	3913.93	4961.94	5490.21	5329.43	6.76308	6.76634	6.91033	6.05488	6.14663	6.09785	NM_011955	chr16:10423501-10423560	Nubp1	Mus musculus nucleotide binding protein 1 (Nubp1), mRNA [NM_011955]	GO:0046872|GO:0051539|GO:0005524|GO:0051536|GO:0017111|GO:0005737|GO:0000166	NM_011955	Mm.29037	26425	ENSMUST00000023146	TC1597001
A_51_P433000	4.57069e-05	1.59944	down	903.473	1164.92	4.60307	3.92551	951.322	989.253	769.845	1143.17	1139.28	1212.31	4.59311	4.65175	4.56435	3.93701	3.87789	3.96163	XM_001473048	chr3:10394245-10394304	LOC100044854	PREDICTED: Mus musculus similar to chromatin modifying protein 4C (LOC100044854), mRNA [XM_001473048]		XM_001473048	Mm.440046	100044854		TC1586186
A_51_P179686	0.000462114	1.69013	down	168.347	206.551	2.18214	1.42501	181.631	174.937	148.474	182.068	215.16	222.425	2.20418	2.15225	2.18999	1.28652	1.47324	1.51526	NM_026327	chr12:73642803-73642862	1810048J11Rik	Mus musculus RIKEN cDNA 1810048J11 gene (1810048J11Rik), mRNA [NM_026327]	GO:0016020|GO:0008150|GO:0003674|GO:0016021|GO:0005575	NM_026327	Mm.11233	67708	ENSMUST00000044352	TC1581799
A_51_P417815	3.1232e-05	3.76728	down	95.5051	52.0831	1.3548	-0.558724	98.646	110.173	77.6968	54.0002	53.5328	48.7165	1.32351	1.48518	1.25571	-0.466922	-0.53367	-0.675579	NM_153067	chr7:54844434-54844375	Mrgpra3	Mus musculus MAS-related GPR, member A3 (Mrgpra3), mRNA [NM_153067]	GO:0004872|GO:0016020|GO:0008150|GO:0004930|GO:0003674|GO:0005886|GO:0007186|GO:0006953|GO:0004871|GO:0016021|GO:0007165|GO:0005575	NM_153067	Mm.240142	233222	ENSMUST00000046797	TC1596770
A_52_P671769	3.30745e-05	2.29888	down	571.859	515.887	3.94866	2.74773	588.407	606.691	520.481	468.308	547.066	532.288	3.89999	3.94638	3.99963	2.6495	2.81955	2.77415	NM_176837	chr10:26637846-26637905	Arhgap18	Mus musculus Rho GTPase activating protein 18 (Arhgap18), mRNA [NM_176837]	GO:0008150|GO:0003674|GO:0005096|GO:0007165|GO:0005575|GO:0005622	NM_176837	Mm.356496	73910	ENSMUST00000039557	TC1577064
A_51_P342716	0.0040278	2.21088	down	21222.4	19815.4	9.15866	8.01404	19259	20256.8	24151.4	19906.5	20312.8	19226.8	8.93257	9.00768	9.53575	8.05914	8.03408	7.94892	NM_172707	chr5:32794896-32794955	Ppp1cb	Mus musculus protein phosphatase 1, catalytic subunit, beta isoform (Ppp1cb), mRNA [NM_172707]	GO:0000164|GO:0004722|GO:0005515|GO:0005975|GO:0005977|GO:0051301|GO:0007049|GO:0005634|GO:0016787|GO:0046872|GO:0042587|GO:0004721|GO:0005981|GO:0005737|GO:0005979|GO:0006470	NM_172707	Mm.241931	19046	ENSMUST00000015100	TC1694644
A_51_P503162	0.025257	2.3616	down	2696.32	2306.79	6.14514	4.90538	2076.96	2356.9	3655.11	2547.81	2345.53	2027.03	5.71958	5.90423	6.81162	5.09323	4.91968	4.70324	NM_011803	chr13:5866706-5866765	Klf6	Mus musculus Krdownpel-like factor 6 (Klf6), mRNA [NM_011803]	GO:0003676|GO:0003700|GO:0006350|GO:0045944|GO:0019221|GO:0003690|GO:0045449|GO:0005634|GO:0046872|GO:0003677|GO:0005737|GO:0008270|GO:0005622	NM_011803	Mm.275036	23849	ENSMUST00000000080	TC1669276
A_51_P126959	0.000146747	3.56727	down	257.349	149.79	2.79944	0.964624	248.834	260.782	262.43	159.272	138.978	151.121	2.65836	2.72826	3.01172	1.09354	0.842692	0.957643	NM_053219	chr6:89972355-89972414	Vmn1r47	Mus musculus vomeronasal 1 receptor 47 (Vmn1r47), mRNA [NM_053219]	GO:0007606|GO:0004872|GO:0019236|GO:0016020|GO:0004930|GO:0005886|GO:0016503|GO:0007186|GO:0004871|GO:0016021|GO:0007165|GO:0005575	NM_053219	Mm.377143	113846	ENSMUST00000074881	TC1600085
A_52_P173703	4.69317e-05	2.18815	down	458.962	432.809	3.62531	2.49559	476.223	510.589	390.075	418.701	413.823	465.903	3.59481	3.69758	3.58353	2.48796	2.41685	2.58197	NM_144557	chr9:120383621-120383680	Myrip	Mus musculus myosin VIIA and Rab interacting protein (Myrip), mRNA [NM_144557]	GO:0006886|GO:0005515|GO:0017022|GO:0001750|GO:0015629|GO:0042470|GO:0017137|GO:0046872|GO:0030050|GO:0005737|GO:0045202|GO:0008270|GO:0003779	NM_144557	Mm.100936	245049	ENSMUST00000048121	TC1583663
A_51_P295131	0.000803228	4.16932	down	95.1326	46.821	1.33908	-0.720733	120.559	78.6739	86.1647	54.3024	41.02	45.1406	1.61291	0.999371	1.40495	-0.45887	-0.917767	-0.785563	NM_011039	chr4:139294423-139294364	Pax7	Mus musculus paired box gene 7 (Pax7), mRNA [NM_011039]	GO:0021904|GO:0051216|GO:0048663|GO:0003700|GO:0006350|GO:0009887|GO:0007275|GO:0021527|GO:0006355|GO:0045449|GO:0030528|GO:0005634|GO:0005667|GO:0043565|GO:0007519|GO:0003677|GO:0043403|GO:0014813|GO:0048706	NM_011039	Mm.218760	18509	ENSMUST00000030508
A_52_P272547	0.00365055	2.06065	down	400.145	402.041	3.43251	2.3894	386.978	370.906	442.551	374.088	421.69	410.344	3.29542	3.23647	3.76563	2.32542	2.44402	2.39877	NM_001025093	chr2:73655772-73655713	Atf2	Mus musculus activating transcription factor 2 (Atf2), transcript variant 1, mRNA [NM_001025093]	GO:0005515|GO:0003700|GO:0046982|GO:0006350|GO:0042423|GO:0046983|GO:0006355|GO:0045449|GO:0005634|GO:0016563|GO:0043565|GO:0046872|GO:0005624|GO:0003677|GO:0008270|GO:0005622	NM_001025093	Mm.209903	11909	ENSMUST00000055833	TC1715346
A_52_P523330	0.000589996	1.67167	down	6797.14	8419.12	7.52064	6.77935	7335.66	6636.04	6419.72	8612.61	8313.92	8330.82	7.54003	7.39766	7.62422	6.85042	6.74529	6.74233	NM_027215	chr7:31513108-31513049	Tmem147	Mus musculus transmembrane protein 147 (Tmem147), mRNA [NM_027215]	GO:0016020|GO:0008150|GO:0003674|GO:0016021|GO:0005575	NM_027215	Mm.27499	69804	ENSMUST00000006478	TC1731833
A_51_P494825	3.93469e-05	2.33033	down	7005.15	6229.94	7.56503	6.3445	7240.99	7205.77	6568.69	6320.95	6385.41	5983.44	7.52129	7.51649	7.65732	6.40411	6.36454	6.26484	NM_001081279	chr8:36742382-36742441	Mfhas1	Mus musculus malignant fibrous histiocytoma amplified sequence 1 (Mfhas1), mRNA [NM_001081279]	GO:0005515|GO:0008150|GO:0003674|GO:0005575	NM_001081279	Mm.103246	52065	ENSMUST00000037666	TC1598720
A_52_P177161	0.000320432	2.42865	down	306.377	263.011	3.05059	1.77043	316.202	310.947	291.982	223.848	287.76	277.426	3.00402	2.98208	3.16566	1.58456	1.8927	1.83404	NM_001081251	chr14:31933983-31934042	Pbrm1	Mus musculus polybromo 1 (Pbrm1), mRNA [NM_001081251]	GO:0005634|GO:0005515|GO:0006350|GO:0016568|GO:0001890|GO:0003677|GO:0003682|GO:0007507|GO:0000776|GO:0045449	NM_001081251	Mm.27913	66923	ENSMUST00000112098	TC1697177
A_52_P31381	0.000323156	9.91018	down	24694.2	5091.05	9.35856	6.04965	21860	20760	31462.5	4608.85	5554.12	5110.18	9.11532	9.04308	9.91727	5.94838	6.16332	6.03724	NM_021353	chr12:32158340-32158399	Slc26a3	Mus musculus solute carrier family 26, member 3 (Slc26a3), mRNA [NM_021353]	GO:0015297|GO:0005887|GO:0005215|GO:0016020|GO:0055085|GO:0016324|GO:0031526|GO:0015380|GO:0008271|GO:0016021|GO:0008272|GO:0006810	NM_021353	Mm.283281	13487	ENSMUST00000001254	TC1591497
A_52_P595104	0.0123431	1.80032	down	1506.25	1751.97	5.33524	4.48699	1715.39	1571.22	1232.13	1292.65	2012.74	1950.53	5.44364	5.31922	5.24286	4.1143	4.69892	4.64773	U63712	chr10:70688232-70688212	Tfam	transcription factor A, mitochondrial Gene [Source:MGI Symbol;Acc:MGI:107810] [ENSMUST00000092430]	GO:0005667|GO:0005634|GO:0003700|GO:0006350|GO:0003677|GO:0006390|GO:0005739|GO:0033108|GO:0045449		Mm.229292	21780	ENSMUST00000092430	TC1707967
A_52_P117313	0.00301072	3.89383	down	160.371	83.5565	2.08434	0.123149	120.44	156.671	204.003	79.3399	88.8833	82.4464	1.61149	1.99315	2.64837	0.08816	0.197819	0.083468	NM_018745	chr15:38417402-38417343	Azin1	Mus musculus antizyme inhibitor 1 (Azin1), transcript variant 2, mRNA [NM_018745]	GO:0008073|GO:0042978|GO:0006595|GO:0003824|GO:0006596	NM_018745	Mm.250214	54375	ENSMUST00000065308
A_51_P464158	4.04882e-05	3.42896	down	4751.88	2882.34	7.00594	5.22817	4838.6	4859.51	4557.53	2553.63	3076.52	3016.86	6.93969	6.94815	7.12996	5.09652	5.31106	5.27692	NM_025480	chr5:38660694-38660753	Tmem128	Mus musculus transmembrane protein 128 (Tmem128), mRNA [NM_025480]	GO:0016020|GO:0008150|GO:0003674|GO:0016021|GO:0005575	NM_025480	Mm.256185	66309	ENSMUST00000087511	TC1577172
A_51_P431737	0.000542421	3.31882	down	5734.37	3572.23	7.27329	5.54262	5303.39	5538.56	6361.16	3586.36	3523.4	3606.93	7.07202	7.13685	7.611	5.58649	5.50673	5.53464	NM_145953	chr3:157557726-157557667	Cth	Mus musculus cystathionase (cystathionine gamma-lyase) (Cth), mRNA [NM_145953]	GO:0004121|GO:0003824|GO:0019344|GO:0030170|GO:0050667|GO:0004123|GO:0016829|GO:0030308|GO:0008652|GO:0006520|GO:0005737|GO:0005575|GO:0006749|GO:0008285	NM_145953	Mm.28301	107869	ENSMUST00000118539	TC1578221
A_51_P163444	0.00550967	1.51206	down	2819.64	3798.47	6.22752	5.63101	3310.54	3034.53	2113.85	3704.07	3886.7	3804.65	6.39217	6.26881	6.02159	5.63308	5.64831	5.61163	NM_025821	chr16:8658895-8658836	Carhsp1	Mus musculus calcium regulated heat stable protein 1 (Carhsp1), mRNA [NM_025821]	GO:0003676|GO:0005515|GO:0008150|GO:0003677|GO:0005737|GO:0006355|GO:0005575	NM_025821	Mm.142095	52502		TC1573787
A_52_P323315	2.39249e-05	9.58587	down	2359.18	510.494	5.99468	2.73377	2281.38	2275.37	2520.77	477.597	544.491	509.394	5.85501	5.85344	6.27558	2.67784	2.81274	2.71072	NM_001001885	chr19:5080843-5080784	Tmem151a	Mus musculus transmembrane protein 151A (Tmem151a), mRNA [NM_001001885]	GO:0016020|GO:0008150|GO:0003674|GO:0016021|GO:0005575	NM_001001885	Mm.329663	381199	ENSMUST00000077066	TC1578760
A_52_P361993	0.00882686	1.55646	down	247.315	329.15	2.74077	2.1025	251.725	231.04	259.179	328.841	335.723	322.886	2.67502	2.55356	2.99373	2.13943	2.11511	2.05297	NM_173181	chr3:7551417-7551476	Fam164a	Mus musculus family with sequence similarity 164, member A (Fam164a), mRNA [NM_173181]	GO:0008150|GO:0003674|GO:0005575	NM_173181	Mm.332366	67306	ENSMUST00000108389	NP1391799
A_51_P515242	0.00366701	2.25628	down	250.878	230.085	2.75609	1.58214	219.775	253.048	279.811	206.414	241.894	241.946	2.4792	2.68482	3.10423	1.46758	1.64221	1.63663	NM_177204	chr6:29909511-29909570	Fam40b	Mus musculus family with sequence similarity 40, member B (Fam40b), transcript variant 1, mRNA [NM_177204]	GO:0008150|GO:0003674|GO:0005575	NM_177204	Mm.56097	320609	ENSMUST00000151738	TC1597599
A_51_P182828	0.0001837	1.6204	down	21423.4	27353.6	9.17498	8.47863	23485.8	21294.5	19489.9	26114.6	28465	27481.2	9.21882	9.07975	9.22637	8.45075	8.52088	8.46424	NM_008828	chrX:103398767-103398826	Pgk1	Mus musculus phosphoglycerate kinase 1 (Pgk1), mRNA [NM_008828]	GO:0005829|GO:0004618|GO:0006096|GO:0005524|GO:0016740|GO:0006094|GO:0016301|GO:0005975|GO:0005737|GO:0000166|GO:0005625|GO:0043531	NM_008828	Mm.336205	18655	ENSMUST00000081593	TC1573707
A_52_P212887	0.000403894	2.66579	down	9135.16	7120.24	7.94884	6.53428	8780.13	9187.73	9437.61	6498.96	7710.47	7151.28	7.79934	7.86705	8.18013	6.44418	6.63658	6.52207	NM_182939	chr6:100817788-100817847	Ppp4r2	Mus musculus protein phosphatase 4, regulatory subunit 2 (Ppp4r2), mRNA [NM_182939]	GO:0008150|GO:0003674|GO:0008380|GO:0005856|GO:0005737|GO:0006397|GO:0005575	NM_182939	Mm.27223	232314	ENSMUST00000063854	TC1572660
A_52_P555680	0.00010354	1.80106	down	1912.85	2188.55	5.68245	4.8336	2051.12	2101.43	1586.01	2019.58	2291.72	2254.34	5.70151	5.73871	5.60711	4.75802	4.8862	4.85658	NM_178811	chr12:29375978-29375919	Ttc15	Mus musculus tetratricopeptide repeat domain 15 (Ttc15), transcript variant 1, mRNA [NM_178811]	GO:0008150|GO:0003674|GO:0005488|GO:0005575	NM_178811	Mm.132006	217449	ENSMUST00000020954	TC1577331
A_52_P665119	0.0021512	2.04225	down	76.1849	77.2065	1.03319	0.00302458	68.9318	89.4938	70.1291	68.7342	74.8258	88.0594	0.806416	1.18527	1.10787	-0.118858	-0.0505562	0.178488	NM_001033364	chr13:54815548-54816994	Cdhr2	Mus musculus cadherin-related family member 2 (Cdhr2), mRNA [NM_001033364]	GO:0005515|GO:0016020|GO:0008150|GO:0007155|GO:0003674|GO:0016021|GO:0005575	NM_001033364	Mm.315382	268663	ENSMUST00000037145	TC1584965
A_51_P299632	0.000136204	1.55048	down	2188.57	2912.34	5.88021	5.24749	2215.66	2450.39	1899.65	2799.54	2962.82	2974.65	5.81284	5.96035	5.86744	5.22916	5.25674	5.25659	NM_027641	chr2:130996807-130996748	Spef1	Mus musculus sperm flagellar 1 (Spef1), mRNA [NM_027641]	GO:0005929|GO:0008150|GO:0003674|GO:0042995|GO:0009434|GO:0019861|GO:0005737	NM_027641	Mm.252722	70997	ENSMUST00000110218	TC1587204
A_52_P567281	0.00654434	1.87498	down	354.503	390.611	3.24603	2.33916	311.404	430.822	321.285	326.42	415.791	429.624	2.98196	3.45251	3.30364	2.12877	2.42369	2.46501		chr8:33994362-33994303		Q9ESA4_RAT (Q9ESA4) Glial growth factor (Fragment), partial (76%) [TC1740216]						TC1740216
A_51_P468599	0.000661691	2.52158	down	3562.22	2926.88	6.58926	5.25494	3450.09	3437.35	3799.22	2845.3	2980.86	2954.48	6.45174	6.44864	6.86742	5.25255	5.26549	5.24677	NM_028887	chr17:71694001-71693942	Smchd1	Mus musculus SMC hinge domain containing 1 (Smchd1), mRNA [NM_028887]	GO:0005515|GO:0060821|GO:0001740|GO:0003674|GO:0051276|GO:0009048|GO:0005524|GO:0005694	NM_028887	Mm.194450	74355	ENSMUST00000024850	TC1602750
A_51_P455776	0.00203623	1.97842	down	126.068	132.122	1.76917	0.784823	122.012	122.974	133.217	130.23	138.849	127.286	1.63019	1.64376	2.03356	0.803101	0.841356	0.710012	NM_026177	chr14:76488526-76488467	1200011I18Rik	Mus musculus RIKEN cDNA 1200011I18 gene (1200011I18Rik), mRNA [NM_026177]	GO:0008150|GO:0003674|GO:0005575	NM_026177	Mm.260767	67467	ENSMUST00000022585	TC1579890
A_52_P98387	0.00022497	2.27011	down	103414	94450.8	11.4475	10.2647	111469	103210	95563.4	102379	92106	88867.4	11.4656	11.3568	11.5201	10.4217	10.215	10.1575	NM_007438	chr7:133938858-133938799	Aldoa	Mus musculus aldolase A, fructose-bisphosphate (Aldoa), transcript variant 2, mRNA [NM_007438]	GO:0016829|GO:0005576|GO:0008150|GO:0008152|GO:0031093|GO:0006096|GO:0019861|GO:0005737|GO:0005739|GO:0004332|GO:0003824	NM_007438	Mm.275831	11674	ENSMUST00000087566	TC1573734
A_52_P554436	0.00893117	1.57785	down	22.4163	28.9363	-0.751383	-1.40934	26.5583	24.2903	16.4003	25.9944	31.2399	29.5745	-0.569589	-0.696132	-0.988428	-1.52169	-1.3107	-1.39563	NM_027100	chr9:86467881-86467940	Rwdd2a	Mus musculus RWD domain containing 2A (Rwdd2a), transcript variant 1, mRNA [NM_027100]	GO:0008150|GO:0003674|GO:0005575	NM_027100	Mm.272517	69519	ENSMUST00000034988	TC1586238
A_52_P1053662	0.000208555	4.81592	down	195.617	84.363	2.39473	0.126923	173.501	226.875	186.476	75.8373	99.922	77.3298	2.13812	2.52731	2.51877	0.0230212	0.36671	-0.00896311		chr6:003264472-003264413
A_51_P204237	0.0794212	1.90439	down	465.226	528.959	3.64108	2.71175	406.581	435.249	553.849	310.984	646.747	629.145	3.36672	3.46726	4.08927	2.05888	3.06104	3.01533	NM_008929	chr14:119374485-119375989	Dnajc3	Mus musculus DnaJ (Hsp40) homolog, subfamily C, member 3 (Dnajc3), mRNA [NM_008929]	GO:0006469|GO:0005737|GO:0004860|GO:0005488|GO:0006986|GO:0005783|GO:0031072	NM_008929	Mm.12616	100037258	ENSMUST00000022734	TC1756126
A_51_P417321	0.0101178	1.84498	down	347.557	393.148	3.23039	2.34678	343.852	322.115	376.705	323.287	426.239	429.916	3.12496	3.03299	3.53322	2.11486	2.4595	2.466	NM_177832	chr18:82765067-82765008	Zfp236	Mus musculus zinc finger protein 236 (Zfp236), mRNA [NM_177832]	GO:0008150|GO:0003674|GO:0005575	NM_177832	Mm.476871	329002	ENSMUST00000097504	TC1579240
A_52_P113465	0.000158158	2.38106	down	5883.68	5128.43	7.31304	6.06144	6046.7	6121.4	5482.93	5413.58	5295.06	4676.66	7.26125	7.2812	7.39666	6.18055	6.09441	5.90935	NM_153103	chr11:70543636-70543695	Kif1c	Mus musculus kinesin family member 1C (Kif1c), mRNA [NM_153103]	GO:0005524|GO:0005874|GO:0007018|GO:0003774|GO:0000166|GO:0006890|GO:0003777|GO:0005794	NM_153103	Mm.99996	16562	ENSMUST00000072187	TC1602240
A_51_P200068	1.24424e-05	1.94777	down	3193.96	3395.43	6.43021	5.46838	3292.59	3386.15	2903.13	3240.7	3383.75	3561.84	6.38433	6.42699	6.47932	5.44028	5.44839	5.51649	NM_007478	chr15:98568667-98568608	Arf3	Mus musculus ADP-ribosylation factor 3 (Arf3), mRNA [NM_007478]	GO:0016192|GO:0015031|GO:0007264|GO:0005525|GO:0005737|GO:0000166|GO:0006810|GO:0005794|GO:0005622	NM_007478	Mm.221298	11842	ENSMUST00000053183	TC1572023
A_51_P289706	0.00111962	1.68448	down	52.1474	63.5498	0.479661	-0.272644	57.2361	57.9443	41.2617	61.5993	68.8825	60.1675	0.538171	0.558152	0.342659	-0.276972	-0.169955	-0.371004	NM_011916	chr9:95940247-95945935	Xrn1	Mus musculus 5'-3' exoribonuclease 1 (Xrn1), mRNA [NM_011916]	GO:0006396|GO:0008409|GO:0003676|GO:0004534|GO:0003723|GO:0000723|GO:0004518|GO:0007569|GO:0006139|GO:0016787|GO:0007126|GO:0003677|GO:0005737|GO:0004527|GO:0005622	NM_011916	Mm.291179	24127	ENSMUST00000034981	TC1603311
A_51_P418809	0.00133101	2.42683	down	137.095	117.098	1.88835	0.609281	127.943	134.3	149.043	108.09	119.249	123.954	1.69868	1.77087	2.19551	0.534281	0.621814	0.671747	NR_027784	chr17:13008303-13008362	Airn	Mus musculus antisense Igf2r RNA (Airn), transcript variant 4, antisense RNA [NR_027784]	GO:0006349	NR_027784	Mm.44983	104103	ENSMUST00000079529	TC1588556
A_51_P446003	2.98223e-05	2.68158	down	2755.23	2126.04	6.21701	4.79392	3004.41	2701.6	2559.69	2164	2108.47	2105.65	6.25218	6.10116	6.29768	4.85767	4.76596	4.75814	NM_013764	chr6:83430316-83430257	Dguok	Mus musculus deoxyguanosine kinase (Dguok), nuclear gene encoding mitochondrial protein, transcript variant 1, mRNA [NM_013764]	GO:0005829|GO:0005524|GO:0016740|GO:0004138|GO:0016301|GO:0006468|GO:0005737|GO:0005739|GO:0016773|GO:0046070|GO:0006139|GO:0000166	NM_013764	Mm.42234	27369	ENSMUST00000101241	TC1580365
A_51_P220055	6.84389e-05	5.06754	down	4344.68	1753.1	6.8533	4.51201	5074	4661.59	3298.45	1931.84	1691.39	1636.08	7.00822	6.88816	6.6635	4.69395	4.44798	4.39411	NM_172404	chr2:30040860-30040801	Ccbl1	Mus musculus cysteine conjugate-beta lyase 1 (Ccbl1), mRNA [NM_172404]	GO:0016212|GO:0008150|GO:0016740|GO:0016769|GO:0003824|GO:0030170|GO:0016829|GO:0003674|GO:0005737|GO:0009058|GO:0008483|GO:0047804|GO:0047316|GO:0005575|GO:0016847	NM_172404	Mm.216089	70266	ENSMUST00000113660	TC1587692
A_51_P508485	4.75425e-05	2.75492	down	1455.93	1095.86	5.29799	3.83598	1420.32	1563.6	1383.88	1022.03	1105.35	1160.21	5.17131	5.31222	5.41043	3.77541	3.83426	3.89826	NM_028651	chr14:123318495-123318436	Tmtc4	Mus musculus transmembrane and tetratricopeptide repeat containing 4 (Tmtc4), mRNA [NM_028651]	GO:0016020|GO:0008150|GO:0003674|GO:0005488|GO:0016021|GO:0005575	NM_028651	Mm.271988	70551	ENSMUST00000143189	TC1670645
A_51_P457430	0.00300428	1.84596	down	4125.37	4531.83	6.77018	5.88581	4982.41	4399.27	2994.43	4622.58	4496.2	4476.69	6.98195	6.80461	6.52399	5.95267	5.85847	5.8463	NM_172960	chr15:76426037-76426096	Adck5	Mus musculus aarF domain containing kinase 5 (Adck5), mRNA [NM_172960]	GO:0016020|GO:0008150|GO:0004674|GO:0003674|GO:0016740|GO:0016301|GO:0005739|GO:0016021	NM_172960	Mm.181624	268822	ENSMUST00000023209	TC1579653
A_51_P133936	0.000520601	2.06268	down	1718.06	1728.64	5.53141	4.48689	1740.59	1917.17	1496.43	1476.81	1793.57	1915.52	5.46467	5.60632	5.52324	4.30646	4.5326	4.62161	NM_013598	chr10:99562481-99562540	Kitl	Mus musculus kit ligand (Kitl), mRNA [NM_013598]	GO:0002763|GO:0050731|GO:0046579|GO:0070668|GO:0005886|GO:0001541|GO:0043066|GO:0008083|GO:0043406|GO:0005173|GO:0007155|GO:0016020|GO:0005856|GO:0033026|GO:0016021|GO:0001755|GO:0008284|GO:0005576|GO:0005515|GO:0005125|GO:0005615|GO:0035234|GO:0045636|GO:0005737|GO:0007281	NM_013598	Mm.45124	17311	ENSMUST00000105282
A_51_P304707	0.000307275	2.07821	down	609.257	608.207	4.0426	2.98726	629.288	611.234	587.248	644.087	586.945	593.591	3.9969	3.95714	4.17375	3.1093	2.92106	2.93141	NM_026465	chr11:29413323-29413264	Prdxdd1	Mus musculus PrdX-deacylase domain 1 (Prdxdd1), transcript variant 2, mRNA [NM_026465]	GO:0008150|GO:0003674|GO:0005575	NM_026465	Mm.251087	67939	ENSMUST00000041448	NP747752
A_51_P331525	9.18081e-06	3.68526	down	1232.76	693.121	5.05838	3.17661	1310.35	1215.9	1172.02	674.52	715.903	688.941	5.05506	4.94937	5.1707	3.1759	3.2076	3.14632	NM_015771	chr14:58308894-58308835	Lats2	Mus musculus large tumor sdownpressor 2 (Lats2), transcript variant A, mRNA [NM_015771]	GO:0004672|GO:0007067|GO:0005524|GO:0016740|GO:0051301|GO:0000166|GO:0007049|GO:0005634|GO:0046872|GO:0004674|GO:0000922|GO:0000082|GO:0006468|GO:0016301|GO:0005737|GO:0005856	NM_015771	Mm.347899	50523	ENSMUST00000022531	TC1574031
A_51_P204801	0.0212939	4.55287	down	650.262	266.876	3.97495	1.78818	309.617	621.738	1019.43	316.534	245.108	238.987	2.97366	3.98172	4.96948	2.0844	1.66125	1.61887	NM_009920	chr19:5092978-5092919	Cnih2	Mus musculus cornichon homolog 2 (Drosophila) (Cnih2), mRNA [NM_009920]	GO:0016020|GO:0016021	NM_009920	Mm.299737	12794	ENSMUST00000025805	TC1580174
A_51_P421223	0.00967914	1.85147	down	34.1675	38.1191	-0.121413	-1.01008	29.1514	36.8368	36.5143	41.2307	35.7046	37.422	-0.43519	-0.0953679	0.166318	-0.856168	-1.11798	-1.0561	NM_010244	chr4:147243749-147243808	Fv1	Mus musculus Friend virus susceptibility 1 (Fv1), mRNA [NM_010244]	GO:0009615|GO:0005794	NM_010244	Mm.422607	14349	ENSMUST00000094481	TC1586817
A_51_P217336	1.11024e-05	2.6531	down	8122.77	6347.4	7.77759	6.36991	8312.95	8574.47	7480.89	5871.53	6645.86	6524.82	7.72046	7.76739	7.84492	6.29771	6.42222	6.38981	NM_029153	chr13:94971658-94971599	Scamp1	Mus musculus secretory carrier membrane protein 1 (Scamp1), mRNA [NM_029153]	GO:0042589|GO:0005515|GO:0006897|GO:0015031|GO:0005768|GO:0019904|GO:0006810|GO:0030672|GO:0016020|GO:0045202|GO:0006887|GO:0008021|GO:0016021|GO:0005794	NM_029153	Mm.201455	107767	ENSMUST00000022197
A_52_P166499	0.0366507	3.25106	down	55.9491	32.9437	0.459456	-1.24145	37.4577	37.8568	92.533	24.9949	36.1113	37.7249	-0.073494	-0.0559616	1.50782	-1.57825	-1.10164	-1.04447	NM_025819	chr1:153258587-153258528	1200016B10Rik	Mus musculus RIKEN cDNA 1200016B10 gene (1200016B10Rik), mRNA [NM_025819]	GO:0008150|GO:0003674|GO:0005575	NM_025819	Mm.290905	66875	ENSMUST00000111883	TC1596094
A_51_P475613	3.91803e-05	2.23035	down	1538.57	1419.76	5.36724	4.20997	1740.03	1603.7	1271.97	1328.36	1457.78	1473.14	5.46422	5.34875	5.28877	4.15361	4.23354	4.24276	NM_029629	chr2:127262135-127262076	Fahd2a	Mus musculus fumarylacetoacetate hydrolase domain containing 2A (Fahd2a), mRNA [NM_029629]	GO:0016787|GO:0046872|GO:0008150|GO:0003674|GO:0008152|GO:0005739|GO:0003824	NM_029629	Mm.288676	68126	ENSMUST00000028848	TC1578696
A_52_P288059	0.013362	2.06885	down	2516.91	2487.31	6.04843	4.9996	2938.66	2887.78	1724.3	2767.51	2777.34	1917.08	6.22026	6.19731	5.72772	5.21256	5.16347	4.62278	NM_026689	chr4:137998022-137998081	Mul1	Mus musculus mitochondrial ubiquitin ligase activator of NFKB 1 (Mul1), nuclear gene encoding mitochondrial protein, mRNA [NM_026689]	GO:0005777|GO:0005741|GO:0005515|GO:0046872|GO:0016020|GO:0008150|GO:0003674|GO:0008270|GO:0005739|GO:0006915|GO:0016021|GO:0016874	NM_026689	Mm.103413	68350	ENSMUST00000105813
A_51_P372294	0.0125568	1.67943	down	410.941	499.837	3.44578	2.69782	434.517	494.257	304.049	572.257	451.691	475.562	3.46259	3.65068	3.22409	2.93871	2.54317	2.61157	NM_026815	chr7:31388487-31388428	downk1a	Mus musculus uroplakin 1A (downk1a), mRNA [NM_026815]	GO:0048029|GO:0006897|GO:0005515|GO:0016020|GO:0016021|GO:0007165	NM_026815	Mm.25471	109637	ENSMUST00000006476	TC1586520
A_51_P502456	0.0125445	1.5762	down	49077.4	62969.9	10.3384	9.68198	55020.2	57716	34496	65019.5	62837.2	61053.2	10.447	10.5182	10.0501	9.76677	9.66331	9.61586	NR_004446	chr17:34112000-34111941	Gm7035	Mus musculus predicted gene 7035 (Gm7035), non-coding RNA [NR_004446]	GO:0008150|GO:0003674|GO:0005575	NR_004446	Mm.458596	630499		TC1661539
A_52_P256279	0.00300091	2.7457	down	321.265	240.624	3.10678	1.64961	275.934	307.163	380.699	227.447	248.349	246.075	2.80749	2.96442	3.54843	1.60757	1.68021	1.66104	NM_173026	chr16:56008005-56008064	Zbtb11	Mus musculus zinc finger and BTB domain containing 11 (Zbtb11), mRNA [NM_173026]	GO:0008150|GO:0003674|GO:0005575	NM_173026	Mm.282814	271377		TC1652115
A_51_P348334	3.3764e-05	2.17971	down	247.449	233.428	2.73098	1.60684	278.116	259.895	204.336	235.194	230.102	234.986	2.81886	2.72335	2.65072	1.65589	1.57011	1.59451	NM_011144	chr15:85631955-85632014	Ppara	Mus musculus peroxisome proliferator activated receptor alpha (Ppara), transcript variant 1, mRNA [NM_011144]	GO:0046982|GO:0006350|GO:0003707|GO:0032868|GO:0019904|GO:0042157|GO:0045449|GO:0003706|GO:0006629|GO:0005634|GO:0046872|GO:0006631|GO:0004879|GO:0003677|GO:0008270|GO:0045776|GO:0019217|GO:0005515|GO:0004872|GO:0046321|GO:0003700|GO:0032099|GO:0045944|GO:0006355|GO:0008544|GO:0008289|GO:0006006|GO:0042060|GO:0016563|GO:0043565|GO:0045941	NM_011144	Mm.212789	19013	ENSMUST00000057979	TC1582677
A_52_P139093	0.00106779	1.70494	down	3637.04	4360.53	6.59942	5.8297	4104.71	4012.26	2794.15	4218.84	4540.05	4322.7	6.70238	6.67176	6.42412	5.82081	5.87247	5.7958	NM_019668	chrX:34421680-34421739	Ube2a	Mus musculus ubiquitin-conjugating enzyme E2A, RAD6 homolog (S. cerevisiae) (Ube2a), mRNA [NM_019668]	GO:0001741|GO:0005515|GO:0001701|GO:0005524|GO:0060135|GO:0043687|GO:0000166|GO:0006281|GO:0000790|GO:0006974|GO:0004842|GO:0051246|GO:0000785|GO:0019787|GO:0016874	NM_019668	Mm.395649	22209	ENSMUST00000016452	TC1779959
A_51_P130757	0.00692701	1.68847	down	1263.89	1552	5.09446	4.33874	1246.08	1204.53	1341.05	1611.67	1581.55	1462.8	4.9825	4.93581	5.36508	4.43252	4.3511	4.2326	NM_025408	chr7:105365320-105365261	Acer3	Mus musculus alkaline ceramidase 3 (Acer3), mRNA [NM_025408]	GO:0016787|GO:0016020|GO:0008150|GO:0003674|GO:0016021|GO:0005575|GO:0005783|GO:0005794	NM_025408	Mm.334041	66190	ENSMUST00000151258	TC1581770
A_52_P311227	9.80512e-06	2.20994	down	720.03	670.42	4.27274	3.12873	782.295	781.725	596.069	657.526	665.451	688.284	4.31089	4.31208	4.19526	3.13909	3.10217	3.14494	NM_019961	chr10:13244519-13244460	Pex3	Mus musculus peroxisomal biogenesis factor 3 (Pex3), transcript variant 1, mRNA [NM_019961]	GO:0005777|GO:0005887|GO:0005515|GO:0016020|GO:0016557|GO:0005778|GO:0007031|GO:0005779|GO:0016021	NM_019961	Mm.282711	56535	ENSMUST00000105539	TC1701191
A_51_P492346	0.000103797	3.91209	down	255.613	134.126	2.77326	0.805316	234.768	311.663	220.407	128.439	129.18	144.761	2.57441	2.9854	2.75995	0.783124	0.737214	0.895609	NM_026685	chr13:99405815-99405756	Tmem174	Mus musculus transmembrane protein 174 (Tmem174), mRNA [NM_026685]	GO:0016020|GO:0008150|GO:0003674|GO:0016021|GO:0005575	NM_026685	Mm.28766	68344	ENSMUST00000050389	TC1588232
A_52_P579441	0.0179864	2.09484	down	2197.65	2143.39	5.87	4.80316	2076.78	1771.17	2745	1964.29	2240.57	2225.33	5.71945	5.49205	6.39852	4.71798	4.85363	4.83789	NM_001045529	chr16:93875888-93875947	Morc3	Mus musculus microrchidia 3 (Morc3), mRNA [NM_001045529]	GO:0016605|GO:0005654|GO:0009791|GO:0005634|GO:0048147|GO:0003674|GO:0051457|GO:0018105|GO:0050821|GO:0006468|GO:0007569	NM_001045529	Mm.287329	338467	ENSMUST00000044068	TC1576808
A_51_P448946	0.0205225	1.51499	down	1382.31	1888.46	5.22201	4.6227	1279.42	1365.93	1501.59	1946.2	1877.78	1841.41	5.0206	5.11722	5.5282	4.70463	4.59879	4.56468	NM_021372	chr11:20548862-20548921	Sertad2	Mus musculus SERTA domain containing 2 (Sertad2), transcript variant 1, mRNA [NM_021372]	GO:0030308|GO:0005634|GO:0005515|GO:0003713|GO:0016563|GO:0006350|GO:0045941|GO:0045893|GO:0045449	NM_021372	Mm.339676	58172	ENSMUST00000109585	TC1594564
A_51_P349262	0.000313102	2.23802	down	7856.87	7288.36	7.73126	6.56904	8142.35	7898.63	7529.63	7889.81	7043.2	6932.06	7.69055	7.64895	7.85429	6.72396	6.50599	6.47715	NM_013604	chr3:89013109-89013050	Mtx1	Mus musculus metaxin 1 (Mtx1), nuclear gene encoding mitochondrial protein, transcript variant 1, mRNA [NM_013604]	GO:0005741|GO:0016020|GO:0015031|GO:0005739|GO:0016021|GO:0006810|GO:0005743	NM_013604	Mm.280943	17827	ENSMUST00000119222	TC1576308
A_51_P108525	0.00021988	3.05111	down	4066.7	2762.91	6.78064	5.17131	3830.24	4212.96	4156.89	2888.07	2684.56	2716.1	6.60254	6.74218	6.99722	5.27408	5.11445	5.1254	NM_031256	chr2:76533615-76533674	Plekha3	Mus musculus pleckstrin homology domain-containing, family A (phosphoinositide binding specific) member 3 (Plekha3), mRNA [NM_031256]	GO:0008289|GO:0016020|GO:0005737|GO:0005545	NM_031256	Mm.41636	83435	ENSMUST00000002810	TC1578940
A_51_P475138	0.000973392	3.53013	down	85.1351	48.2811	1.15093	-0.668794	99.5495	100.761	55.0948	52.0698	47.0411	45.7324	1.33666	1.35635	0.75977	-0.519439	-0.720172	-0.766771	NM_001099297	chr2:122173491-122173550	Duox1	Mus musculus dual oxidase 1 (Duox1), mRNA [NM_001099297]	GO:0016020|GO:0016491|GO:0016021|GO:0055114	NM_001099297	Mm.108582	99439	ENSMUST00000099461	TC1601504
A_51_P205278	0.0286132	1.99954	down	560.476	573.046	3.89531	2.89564	473.842	487.056	720.529	496.428	599.908	622.802	3.58758	3.6295	4.46884	2.73363	2.95258	3.00071	NM_175187	chr13:84435050-84435109	Tmem161b	Mus musculus transmembrane protein 161B (Tmem161b), transcript variant 1, mRNA [NM_175187]	GO:0016020|GO:0008150|GO:0003674|GO:0016021|GO:0005575	NM_175187	Mm.295063	72745	ENSMUST00000057495	TC1645967
A_51_P483231	0.000899574	2.32648	down	2557.79	2280.73	6.11197	4.89382	2587.8	2430.85	2654.72	2395.88	2304.39	2141.93	6.03683	5.94881	6.35027	5.00453	4.89415	4.78278	NM_008413	chr19:29386361-29386420	Jak2	Mus musculus Janus kinase 2 (Jak2), transcript variant 1, mRNA [NM_008413]	GO:0004672|GO:0004713|GO:0005143|GO:0033160|GO:0030099|GO:0030335|GO:0050729|GO:0045429|GO:0045597|GO:0007204|GO:0042523|GO:0050867|GO:0033130|GO:0031103|GO:0005634|GO:0016020|GO:0043560|GO:0005829|GO:0042503|GO:0006468|GO:0016301|GO:0042508|GO:0008284|GO:0008285|GO:0007243|GO:0016740|GO:0031959|GO:0042517|GO:0043065|GO:0007262|GO:0043526|GO:0009755|GO:0005737|GO:0032731|GO:0006915|GO:0043392|GO:…	NM_008413	Mm.275839	16452	ENSMUST00000065796	TC1580801
A_52_P434934	0.00010998	3.01689	down	2013.31	1386.02	5.76754	4.17447	1983.97	2032.93	2023.02	1285.85	1477.7	1394.49	5.65349	5.6909	5.95822	4.1067	4.25312	4.16361	NM_177215	chrX:45318858-45318917	Ocrl	Mus musculus oculocerebrorenal syndrome of Lowe (Ocrl), mRNA [NM_177215]	GO:0046856|GO:0004439|GO:0005794	NM_177215	Mm.210343	320634	ENSMUST00000115013	TC1575639
A_51_P379373	0.00218065	2.65788	down	1286.69	999.657	5.1135	3.70323	1240.52	1144.24	1475.32	927.18	1056.81	1014.98	4.97604	4.86173	5.50274	3.63489	3.76948	3.70531	NM_145381	chr1:13616246-13616187	Lactb2	Mus musculus lactamase, beta 2 (Lactb2), mRNA [NM_145381]	GO:0016787|GO:0046872|GO:0008150|GO:0003674|GO:0005739	NM_145381	Mm.89572	212442	ENSMUST00000027071	TC1666927
A_52_P443334	0.000117625	3.53094	down	248.894	144.084	2.72987	0.909816	245.767	303.099	197.815	150.76	144.056	137.434	2.64046	2.9452	2.60393	1.0143	0.894464	0.820684	NM_001081110	chr6:71328911-71328970	Cd8a	Mus musculus CD8 antigen, alpha chain (Cd8a), transcript variant 1, mRNA [NM_001081110]	GO:0002456|GO:0016020|GO:0007166|GO:0042110|GO:0009986|GO:0045065|GO:0009897|GO:0042803|GO:0016021|GO:0050850	NM_001081110	Mm.1858	12525		NP570089
A_51_P313093	0.00272547	3.07549	down	1310.52	874.697	5.13251	3.51169	1216.18	1129.62	1585.77	911.128	881.534	831.43	4.94746	4.84318	5.6069	3.6097	3.50785	3.41754	AK008991	chr9:77973003-77973062		intestinal cell kinase Gene [Source:MGI Symbol;Acc:MGI:1934157] [ENSMUST00000009972]			Mm.288719		ENSMUST00000009972	TC1593048
A_52_P58994	0.00827237	1.654	down	6155.92	7733.87	7.37942	6.65346	6140.88	5944.25	6382.63	8463.18	7602.36	7136.09	7.28355	7.23884	7.61586	6.82517	6.61621	6.519	NM_008831	chr11:95541201-95541260	Phb	Mus musculus prohibitin (Phb), mRNA [NM_008831]	GO:0031315|GO:0005634|GO:0016020|GO:0030061|GO:0043066|GO:0005737|GO:0006260|GO:0005739|GO:0005743|GO:0008285	NM_008831	Mm.263862	18673	ENSMUST00000125172	TC1636256
A_51_P476829	0.000915315	1.87	down	993.911	1087.85	4.72978	3.82674	1179.23	1013.75	788.753	1132.67	1068.43	1062.47	4.90295	4.68704	4.59936	3.92369	3.78525	3.77129	BC138522	chr2:163292371-163292312	Fitm2	fat storage-inducing transmembrane protein 2 Gene [Source:MGI Symbol;Acc:MGI:2444508] [ENSMUST00000088333]	GO:0016020|GO:0005739|GO:0016021|GO:0005783		Mm.242917	228859	ENSMUST00000088333	TC1597623
A_52_P101416	0.0223665	1.80681	down	893.038	1027.42	4.58499	3.73154	761.74	903.307	1014.07	837.021	1129.17	1116.07	4.27247	4.52063	4.96186	3.48731	3.86503	3.84229	NM_198110	chrX:147418084-147418025	Gnl3l	Mus musculus guanine nucleotide binding protein-like 3 (nucleolar)-like (Gnl3l), transcript variant 1, mRNA [NM_198110]	GO:0005634|GO:0008150|GO:0003674|GO:0005525|GO:0000166|GO:0005575|GO:0042254|GO:0005622	NM_198110	Mm.45987	237107	ENSMUST00000112691
A_51_P117604	0.00244734	2.30458	down	6467.82	5799.55	7.44624	6.24174	6045.13	6109.5	7248.84	5746.18	5773.39	5879.09	7.26088	7.2784	7.79946	6.26657	6.21918	6.23946	NM_025887	chr17:53646662-53646721	Rab5a	Mus musculus RAB5A, member RAS oncogene family (Rab5a), mRNA [NM_025887]	GO:0048169|GO:0006897|GO:0015031|GO:0005886|GO:0043025|GO:0019001|GO:0030425|GO:0000166|GO:0006810|GO:0016020|GO:0051021|GO:0001726|GO:0030139|GO:0042589|GO:0007264|GO:0045121|GO:0005525|GO:0043234|GO:0005768|GO:0030424|GO:0003924|GO:0005769|GO:0048471|GO:0005737|GO:0019717|GO:0008021	NM_025887	Mm.329123	271457	ENSMUST00000017975	TC1572967
A_52_P629935	1.78654e-05	2.8363	down	261.105	189.339	2.80826	1.30425	282.593	286.487	214.236	192.466	194.228	181.325	2.8419	2.86388	2.71899	1.36664	1.32558	1.22052	NM_181855	chrX:70114887-70114946	Magea9	Mus musculus melanoma antigen, family A, 9 (Magea9), mRNA [NM_181855]	GO:0008150|GO:0003674|GO:0005575	NM_181855	Mm.377231	195772	ENSMUST00000060248	NP822907
A_52_P244964	9.84299e-05	3.39256	down	2002.88	1225.86	5.75978	3.99741	2027.82	1941.97	2038.84	1131.36	1260.96	1285.25	5.68503	5.62487	5.96946	3.92203	4.02429	4.04592	NM_001164503	chr14:78892315-78892256	Akap11	Mus musculus A kinase (PRKA) anchor protein 11 (Akap11), mRNA [NM_001164503]	GO:0032947|GO:0005777|GO:0005515|GO:0019207|GO:0043234|GO:0005737|GO:0010738|GO:0034237	NM_001164503	Mm.89413	219181	ENSMUST00000123853	TC1600994
A_51_P401958	0.00116726	1.73083	down	30698.8	36841.5	9.6975	8.90604	29981.8	32019.6	30095.1	33493.1	38414.1	38617.2	9.57112	9.66822	9.85317	8.80976	8.95333	8.95504	NM_011528	chr7:148588764-148588823	Taldo1	Mus musculus transaldolase 1 (Taldo1), mRNA [NM_011528]	GO:0005792|GO:0006098|GO:0005529|GO:0016740|GO:0005975|GO:0004801|GO:0003824|GO:0048029|GO:0009052|GO:0006002|GO:0005829|GO:0008152|GO:0005737|GO:0019682|GO:0005625	NM_011528	Mm.29182	21351	ENSMUST00000026576	TC1573334
A_52_P622874	0.0436786	1.79638	down	74.3933	84.5649	0.983658	0.138564	65.5567	62.7536	94.8696	85.5045	76.9728	91.2175	0.733988	0.673185	1.5438	0.196114	-0.00974369	0.229323	AK088506	chr19:45836891-45836832	E330018D03Rik	Mus musculus 2 days neonate thymus thymic cells cDNA, RIKEN full-length enriched library, clone:E430019C04 product:unclassifiable, full insert sequence. [AK088506]			Mm.435821	320319		TC1583862
A_51_P116609	0.0210885	2.40529	down	225.504	187.454	2.55658	1.29037	146.15	263.623	266.738	184.24	189.077	189.044	1.89063	2.74389	3.03521	1.30363	1.28681	1.28066	NM_025687	chr9:50365486-50365427	Tex12	Mus musculus testis expressed gene 12 (Tex12), mRNA [NM_025687]	GO:0005515|GO:0000795	NM_025687	Mm.442255	66654	ENSMUST00000034568	TC1585575
A_51_P286665	0.00056276	4.72949	down	2738.05	1190.55	6.1987	3.95702	2407.74	2554	3252.4	1158.29	1181.21	1232.15	5.93278	6.0201	6.64321	3.95596	3.93003	3.98505	NM_011249	chr2:156972202-156972143	Rbl1	Mus musculus retinoblastoma-like 1 (p107) (Rbl1), transcript variant 1, mRNA [NM_011249]	GO:0005667|GO:0005634|GO:0005515|GO:0006350|GO:0016568|GO:0007049|GO:0000122|GO:0045449	NM_011249	Mm.244671	19650	ENSMUST00000029170	TC1575637
A_51_P462249	0.0148112	2.06373	down	6272.94	6245.48	7.38974	6.34449	5432.53	5703.13	7683.16	5589.12	6506.02	6641.31	7.10672	7.1791	7.88341	6.22659	6.39154	6.41534	NM_025415	chr13:51745898-51745957	Cks2	Mus musculus CDC28 protein kinase regulatory subunit 2 (Cks2), mRNA [NM_025415]	GO:0007127|GO:0016538|GO:0016301|GO:0051301|GO:0007049	NM_025415	Mm.222228	66197	ENSMUST00000075853	TC1576397
A_51_P137007	0.0453457	1.51828	down	1634.5	2217.01	5.4567	4.85427	1428.12	1576.31	1899.07	2178.27	2204.08	2268.67	5.17922	5.32389	5.867	4.86715	4.82994	4.86572	NM_012039	chr9:48886529-48886588	Zw10	Mus musculus ZW10 homolog (Drosophila), centromere/kinetochore protein (Zw10), mRNA [NM_012039]	GO:0016192|GO:0016020|GO:0015031|GO:0007067|GO:0005856|GO:0005737|GO:0051301|GO:0007049|GO:0000776|GO:0006810|GO:0005783	NM_012039	Mm.24791	26951	ENSMUST00000034803	TC1626549
A_51_P256154	0.00365049	1.92726	down	10696.3	11512.1	8.17486	7.22831	10349.8	10197.5	11541.5	10651.5	12351.7	11533	8.03663	8.01748	8.47047	7.15695	7.3164	7.21157	NM_012010	chrX:91434404-91434345	Eif2s3x	Mus musculus eukaryotic translation initiation factor 2, subunit 3, structural gene X-linked (Eif2s3x), mRNA [NM_012010]	GO:0008150|GO:0003743|GO:0003674|GO:0006412|GO:0005525|GO:0000166|GO:0005575|GO:0003924	NM_012010	Mm.218851	26905	ENSMUST00000050328	TC1690815
A_52_P522977	0.00471812	2.42118	down	242.675	207.744	2.69603	1.42032	216.64	300.211	211.175	238.825	163.699	220.708	2.45847	2.93139	2.69822	1.67799	1.07888	1.50408	NM_024272	chr13:91841845-91841904	Ssbp2	Mus musculus single-stranded DNA binding protein 2 (Ssbp2), transcript variant 2, mRNA [NM_024272]	GO:0030528|GO:0005634|GO:0005515|GO:0008150|GO:0006350|GO:0003677|GO:0003697|GO:0005575|GO:0045449	NM_024272	Mm.343095	66970	ENSMUST00000004094	TC1617902
A_52_P669005	0.00865331	2.18605	down	131.61	121.91	1.78216	0.653834	134.572	171.043	89.2155	97.6158	137.939	130.176	1.77155	2.11978	1.45515	0.387228	0.831871	0.742402	NM_023624	chr3:82696864-82696805	Lrat	Mus musculus lecithin-retinol acyltransferase (phosphatidylcholine-retinol-O-acyltransferase) (Lrat), mRNA [NM_023624]	GO:0005792|GO:0008374|GO:0001972|GO:0016740|GO:0007601|GO:0042572|GO:0006776|GO:0047173|GO:0006653|GO:0016020|GO:0008415|GO:0009790|GO:0019841|GO:0050896|GO:0016021|GO:0005783	NM_023624	Mm.33921	79235	ENSMUST00000029632	TC1700855
A_52_P482124	0.00105531	1.88377	down	1683.99	1836.44	5.49115	4.57752	1772.77	1952.13	1327.06	1628.45	1998.24	1882.62	5.4911	5.63239	5.34994	4.44747	4.68849	4.59661	NM_026455	chr8:74747151-74747210	Fam32a	Mus musculus family with sequence similarity 32, member A (Fam32a), mRNA [NM_026455]	GO:0008150|GO:0003674|GO:0005575	NM_026455	Mm.28327	67922		TC1599767
A_52_P196105	0.0146445	1.90605	down	1904.17	2117.39	5.68239	4.7518	2117.5	1852.64	1742.38	1488.25	2417.49	2446.44	5.74746	5.55692	5.74277	4.31759	4.96327	4.97455	NM_175274	chr5:141096656-141096597	Ttyh3	Mus musculus tweety homolog 3 (Drosophila) (Ttyh3), mRNA [NM_175274]	GO:0034707|GO:0016020|GO:0008150|GO:0005886|GO:0006811|GO:0005254|GO:0005216|GO:0016021|GO:0006810	NM_175274	Mm.28947	78339	ENSMUST00000042661	TC1628822
A_51_P214837	0.00141378	3.02217	down	2520.17	1719.91	6.08304	4.48745	2352.48	2293.28	2914.73	1666.97	1796.73	1696.03	5.89929	5.86476	6.48507	4.4812	4.53513	4.44603	NM_001039692	chr18:6025485-6025426	Arhgap12	Mus musculus Rho GTPase activating protein 12 (Arhgap12), transcript variant 1, mRNA [NM_001039692]	GO:0005515|GO:0008150|GO:0003674|GO:0005096|GO:0007165|GO:0005575|GO:0005622	NM_001039692	Mm.239675	75415	ENSMUST00000062584	TC1593078
A_51_P268559	0.00178675	2.40613	down	9622.53	8287.6	8.02068	6.75397	9029.24	9221.31	10617	7618.82	8361.78	8882.2	7.83971	7.87231	8.35002	6.67354	6.75357	6.83479	NM_029573	chr9:54451368-54451427	Idh3a	Mus musculus isocitrate dehydrogenase 3 (NAD+) alpha (Idh3a), nuclear gene encoding mitochondrial protein, mRNA [NM_029573]	GO:0004449|GO:0000287|GO:0046872|GO:0006102|GO:0006103|GO:0005739|GO:0016491|GO:0006099|GO:0051287|GO:0016616|GO:0006734|GO:0055114	NM_029573	Mm.279195	67834	ENSMUST00000034818	TC1733746
A_52_P589391	0.0195453	2.42776	down	63.0702	51.8568	0.716122	-0.563506	40.6231	77.682	70.9056	51.3916	52.4287	51.75	0.0435462	0.981066	1.12375	-0.538352	-0.563736	-0.588429	NM_010069	chr7:133995963-133996022	Doc2a	Mus musculus double C2, alpha (Doc2a), mRNA [NM_010069]	GO:0005764|GO:0005544|GO:0031410|GO:0005215|GO:0016020|GO:0030054|GO:0045202|GO:0006887|GO:0019717|GO:0008021|GO:0006810|GO:0017158	NM_010069	Mm.479543	13446	ENSMUST00000064110	TC1583531
A_51_P206971	0.000404559	1.55226	down	356.738	472.309	3.25719	2.62282	383.024	397.275	289.915	455.966	466.337	494.625	3.28061	3.33555	3.15541	2.61097	2.58921	2.66827	NM_008612	chr12:74373513-74373572	Mnat1	Mus musculus menage a trois 1 (Mnat1), mRNA [NM_008612]	GO:0005515|GO:0006350|GO:0043066|GO:0007049|GO:0006355|GO:0045449|GO:0005634|GO:0048661|GO:0046872|GO:0000082|GO:0051592|GO:0008270|GO:0006915|GO:0050790|GO:0021591|GO:0007512|GO:0044236	NM_008612	Mm.246750	17420	ENSMUST00000021523	TC1576962
A_51_P242634	0.000430103	2.20593	down	1822.29	1715.68	5.62255	4.48116	1925.18	1742.57	1799.12	1550.04	1798.8	1798.19	5.6101	5.46856	5.789	4.37627	4.5368	4.53042	AF345951	chr6:134665696-134665656	Dusp16	Mus musculus map kinase phosphatase-M A1 isoform mRNA, complete cds. [AF345951]	GO:0005634|GO:0005515|GO:0016787|GO:0000188|GO:0016301|GO:0005737|GO:0016791		Mm.479215	70686		NP395659
A_52_P642541	4.8694e-05	2.80865	down	487.577	360.22	3.71613	2.22626	515.706	518.911	428.115	316.804	363.826	400.031	3.70972	3.7209	3.71778	2.08563	2.23108	2.36205	BC061469	chr8:23181643-23181702		asparagine-linked glycosylation 11 homolog (yeast, alpha-1,2-mannosyltransferase) Gene [Source:MGI Symbol;Acc:MGI:2142632] [ENSMUST00000072572]			Mm.267439		ENSMUST00000072572
A_51_P263983	0.00394698	2.64536	down	63.8458	50.0707	0.777853	-0.62561	53.1225	70.0368	68.3781	55.4394	41.4637	53.3089	0.43057	0.8316	1.07139	-0.428976	-0.902242	-0.545611	NM_146908	chr2:111156344-111156403	Olfr1280	Mus musculus olfactory receptor 1280 (Olfr1280), mRNA [NM_146908]	GO:0004872|GO:0004984|GO:0004930|GO:0007608|GO:0007186|GO:0004871|GO:0016021|GO:0007165	NM_146908	Mm.389381	258910	ENSMUST00000090328	TC1648987
A_51_P215775	0.000487524	1.96714	down	1132.86	1194.71	4.93799	3.96189	1140.21	1135	1123.36	1207.54	1146.49	1230.1	4.8544	4.85003	5.10953	4.01604	3.88698	3.98264	NM_029572	chr4:48224577-48221682	Erp44	Mus musculus endoplasmic reticulum protein 44 (Erp44), mRNA [NM_029572]	GO:0005788|GO:0005515|GO:0045454|GO:0006986|GO:0005783	NM_029572	Mm.317701	76299	ENSMUST00000030028	TC1575650
A_52_P564663	0.00128434	2.54271	down	180.416	148.034	2.28608	0.939717	170.451	181.198	189.6	124.565	154.562	164.975	2.11253	2.20298	2.54274	0.738939	0.996025	1.08419		chr1:6241633-6241692		Q8CHH8_MOUSE (Q8CHH8) MKIAA0203 protein (Fragment), partial (4%) [TC1629326]						TC1629326
A_51_P308469	0.00246197	2.00188	down	655.579	678.419	4.14627	3.14491	602.92	667.087	696.73	652.921	717.227	665.108	3.93514	4.08329	4.42038	3.12895	3.21027	3.09553	NM_011884	chr4:33589410-33589469	Rngtt	Mus musculus RNA guanylyltransferase and 5'-phosphatase (Rngtt), mRNA [NM_011884]	GO:0008138|GO:0005525|GO:0016740|GO:0000166|GO:0006397|GO:0003824|GO:0004484|GO:0016311|GO:0005634|GO:0016787|GO:0006370|GO:0016779|GO:0004651|GO:0016791|GO:0004725|GO:0006470	NM_011884	Mm.240024	24018	ENSMUST00000108153	TC1595085
A_51_P220718	0.0255536	3.02388	down	232.223	172.648	2.64807	1.05167	218.366	255.501	222.803	237.434	87.4589	193.053	2.46992	2.69874	2.77555	1.66957	0.174513	1.31093	AK081687	chr3:40729005-40729064		Mus musculus 16 days embryo head cDNA, RIKEN full-length enriched library, clone:C130067L08 product:inferred: RIKEN cDNA 1110034I12 gene, full insert sequence. [AK081687]			Mm.417640
A_52_P83905	0.000224142	4.65676	down	9975.47	4429.15	8.07141	5.85208	10068.7	8919.24	10938.5	4545.89	4521.03	4220.52	7.99691	7.82426	8.39305	5.92853	5.86642	5.76129	NM_007885	chr18:61357916-61357857	Slc26a2	Mus musculus solute carrier family 26 (sulfate transporter), member 2 (Slc26a2), mRNA [NM_007885]	GO:0005215|GO:0016020|GO:0015116|GO:0001503|GO:0055085|GO:0008271|GO:0016021|GO:0008272|GO:0006810	NM_007885	Mm.24803	13521	ENSMUST00000037603	TC1582121
A_52_P123864	0.00436791	2.30044	down	2076.97	1863.04	5.80354	4.60163	1857.75	1968.21	2404.96	1739.6	1971.47	1878.07	5.55866	5.64423	6.20772	4.54272	4.66904	4.59312	NM_024454	chr10:114727197-114727138	Rab21	Mus musculus RAB21, member RAS oncogene family (Rab21), mRNA [NM_024454]	GO:0031410|GO:0005515|GO:0016020|GO:0015031|GO:0007264|GO:0005525|GO:0005768|GO:0000166|GO:0006810|GO:0005783|GO:0005794	NM_024454	Mm.21936	216344	ENSMUST00000020343	TC1578353
A_51_P428578	0.000350266	1.6349	down	666.777	840.874	4.16444	3.45524	749.272	679.26	571.8	870.109	811.329	841.185	4.24866	4.10938	4.13529	3.54324	3.38812	3.43436	NM_025459	chr15:25899970-25901357	Fam134b	Mus musculus family with sequence similarity 134, member B (Fam134b), transcript variant 2, mRNA [NM_025459]	GO:0016020|GO:0008150|GO:0003674|GO:0005801|GO:0016021|GO:0005794	NM_025459	Mm.25311	66270	ENSMUST00000110438	TC1591249
A_52_P819356	0.0420871	2.41661	down	364.356	295.711	3.21848	1.94549	261.875	284.097	547.097	285.802	321.09	280.242	2.73205	2.8518	4.07158	1.93706	2.05081	1.84861	AK041684	chr3:35654505-35654564		Mus musculus 3 days neonate thymus cDNA, RIKEN full-length enriched library, clone:A630029O19 product:unclassifiable, full insert sequence. [AK041684]			Mm.239416			TC1606935
A_52_P245806	0.0101104	1.98552	down	38.1113	38.7305	0.00272719	-0.986793	51.5746	32.0817	30.6776	41.8107	36.822	37.5587	0.387905	-0.294765	-0.084959	-0.836015	-1.07352	-1.05084	NR_002844	chrX:100676837-100676896	Tsix	Mus musculus X (inactive)-specific transcript, antisense (Tsix), antisense RNA [NR_002844]	GO:0009048|GO:0048096	NR_002844	Mm.472939	22097		TC1654221
A_51_P360262	3.69724e-05	2.37036	down	1762.31	1526.91	5.56073	4.31563	1992.12	1870.32	1424.5	1453.7	1569.15	1557.86	5.6594	5.57063	5.45216	4.2837	4.33974	4.32344	NM_053122	chr12:43056151-43056210	Immp2l	Mus musculus IMP2 inner mitochondrial membrane peptidase-like (S. cerevisiae) (Immp2l), nuclear gene encoding mitochondrial protein, mRNA [NM_053122]	GO:0030728|GO:0006627|GO:0001541|GO:0008236|GO:0005739|GO:0008233|GO:0007283|GO:0005743|GO:0006508|GO:0016787|GO:0016020|GO:0008104|GO:0042720|GO:0016021	NM_053122	Mm.363813	93757	ENSMUST00000134965	TC1585091
A_52_P347942	0.000227204	2.65954	down	87.9591	68.8236	1.24665	-0.164529	96.5205	87.6074	79.7493	59.5328	78.7861	68.1519	1.29208	1.15454	1.29333	-0.326202	0.0238485	-0.191233	NM_146472	chr11:49327878-49327937	Olfr1384	Mus musculus olfactory receptor 1384 (Olfr1384), mRNA [NM_146472]	GO:0004872|GO:0004984|GO:0004930|GO:0007608|GO:0007186|GO:0004871|GO:0016021|GO:0007165	NM_146472	Mm.271389	258464	ENSMUST00000060434	TC1709154
A_51_P499195	0.0542451	1.78534	down	106.093	115.024	1.42191	0.585712	132.234	129.23	56.8145	114.839	117.22	113.013	1.74626	1.71535	0.804114	0.621657	0.597053	0.538426	NM_024253	chr7:50693148-50693207	Nkg7	Mus musculus natural killer cell grodown 7 sequence (Nkg7), mRNA [NM_024253]	GO:0008150|GO:0003674|GO:0016021|GO:0005575	NM_024253	Mm.34613	72310	ENSMUST00000070518	TC1585609
A_52_P365803	0.0271918	2.13303	down	70.586	66.9056	0.895878	-0.197025	53.3295	65.8903	92.5382	66.133	64.0545	70.5292	0.43618	0.743552	1.5079	-0.174516	-0.274792	-0.141767	BC052920	chr4:154999814-154999873		cyclin-dependent kinase 11B Gene [Source:MGI Symbol;Acc:MGI:88353] [ENSMUST00000105598]			Mm.267410		ENSMUST00000105598	TC1655985
A_51_P138807	0.0241598	2.13577	down	56.1864	55.0288	0.589728	-0.505028	45.7281	58.31	64.5212	65.2513	41.0539	58.7813	0.214327	0.567229	0.987628	-0.193879	-0.916574	-0.404631	AK006001	chr2:164569663-164569604		Putative uncharacterized proteinMCG17500, isoform CRA_c ; [Source:UniProtKB/TrEMBL;Acc:Q9DAB2] [ENSMUST00000043448]			Mm.330770		ENSMUST00000043448	TC1589343
A_51_P183701	0.0021272	5.58749	down	439.867	164.426	3.54883	1.06663	331.713	484.671	503.216	206.559	120.322	166.397	3.07311	3.62242	3.95096	1.46859	0.634731	1.09657
A_52_P621418	0.000166853	1.69897	down	10277.6	12506.8	8.11318	7.34852	10344.7	11411.5	9076.56	11643.6	13219	12657.6	8.03592	8.17976	8.12386	7.28544	7.41431	7.3458	XM_142195	chrX:138968195-138968136	Gm4995	PREDICTED: Mus musculus predicted gene, EG245651 (EG245651), mRNA [XM_142195]	GO:0008150|GO:0003674|GO:0005739	XM_142195		245651
A_51_P492595	0.000538146	2.08713	down	737.43	732.062	4.31667	3.25515	786.23	692.172	733.889	700.281	756.726	739.178	4.31812	4.13654	4.49535	3.22998	3.28761	3.24786	NM_172518	chr4:140756651-140756710	Fbxo42	Mus musculus F-box protein 42 (Fbxo42), mRNA [NM_172518]	GO:0008150|GO:0003674|GO:0005575	NM_172518	Mm.28865	213499	ENSMUST00000030757	TC1578961
A_51_P245102	0.0140157	3.68831	down	165.423	96.861	2.13961	0.256651	128.131	170.676	197.463	126.48	56.2689	107.834	1.70079	2.11667	2.60137	0.760956	-0.461753	0.470749	AK019837	chr2:179149723-179149782		RIKEN cDNA 4930591A17 gene Gene [Source:MGI Symbol;Acc:MGI:1915425] [ENSMUST00000041998]			Mm.158187		ENSMUST00000041998	TC1592317
A_52_P215176	0.0712263	1.57086	down	99.1116	123.88	1.343	0.691452	117.617	122.557	57.1604	116.247	128.626	126.765	1.57728	1.63887	0.812871	0.63924	0.731017	0.7041	NM_010098	chr1:177592882-177592823	Opn3	Mus musculus opsin 3 (Opn3), mRNA [NM_010098]	GO:0007602|GO:0004872|GO:0016020|GO:0004930|GO:0018298|GO:0009881|GO:0007186|GO:0004871|GO:0007601|GO:0050896|GO:0016021|GO:0007165	NM_010098	Mm.32744	13603	ENSMUST00000027809	TC1583169
A_51_P481569	2.78339e-05	1.64626	down	3230.46	4043.1	6.44018	5.72099	3572.93	3390.85	2727.58	3924.43	4069.97	4134.91	6.50221	6.42899	6.38933	5.71645	5.71478	5.73172	NM_028074	chr11:106110380-106110439	Ddx42	Mus musculus DEAD (Asp-Glu-Ala-Asp) box polypeptide 42 (Ddx42), mRNA [NM_028074]	GO:0004386|GO:0003676|GO:0008026|GO:0005634|GO:0016787|GO:0008150|GO:0003674|GO:0005524|GO:0003723|GO:0000166|GO:0005575	NM_028074	Mm.41367	72047	ENSMUST00000021046	TC1572548
A_51_P415675	0.000218935	2.94036	down	111.088	77.0323	1.56224	0.00624688	117.649	131.764	83.8512	78.9349	79.5652	72.5968	1.57766	1.74337	1.36569	0.0807776	0.0380445	-0.100081	U08337	chr2:155767042-155766987	Gdf5	Mus musculus CD-1 putative growth factor GDF5 (Gdf5) mRNA, complete cds. [U08337]	GO:0005515|GO:0005576|GO:0040007|GO:0005125|GO:0005615|GO:0008083|GO:0042981|GO:0032332|GO:0035129|GO:0040014|GO:0035136|GO:0035137|GO:0030326		Mm.4744	14563		TC1594980
A_51_P355906	7.51404e-05	2.78342	down	3304.26	2439.04	6.46714	4.99028	3622.23	3638.95	2651.6	2552.61	2266.76	2497.74	6.52198	6.53086	6.34857	5.09594	4.8704	5.00449	Y00864	chr5:76052287-76052346	Kit	Mouse c-kit mRNA. [Y00864]	GO:0004672|GO:0004713|GO:0009898|GO:0030097|GO:0030335|GO:0043069|GO:0048103|GO:0035019|GO:0016020|GO:0006468|GO:0016301|GO:0001669|GO:0008284|GO:0004872|GO:0007243|GO:0016740|GO:0002318|GO:0009986|GO:0005737|GO:0007281|GO:0007169|GO:0018108|GO:0005524|GO:0030154|GO:0043406|GO:0000166|GO:0002320|GO:0019221|GO:0007283|GO:0006687|GO:0005020|GO:0048170|GO:0050673|GO:0046777|GO:0031274|GO:0043473|GO:…		Mm.247073	16590		TC1593379
A_51_P345896	0.00102166	1.87318	down	5702.07	6317.02	7.2695	6.36401	5668.73	5759.83	5677.63	6596.47	6356.7	5997.9	7.16813	7.19337	7.447	6.46566	6.35804	6.26833	NM_133880	chr4:133983185-133983244	Pafah2	Mus musculus platelet-activating factor acetylhydrolase 2 (Pafah2), mRNA [NM_133880]	GO:0016042|GO:0016787|GO:0006916|GO:0003847|GO:0005737	NM_133880	Mm.22116	100163	ENSMUST00000039233	TC1577597
A_51_P355014	5.77636e-06	2.45888	down	43105.1	36228	10.1819	8.88392	43856.9	47411.2	38047.3	34533.5	37789.3	36361.3	10.1198	10.2345	10.1914	8.85389	8.92967	8.8682	NM_011471	chr3:92156847-92156906	Sprr2e	Mus musculus small proline-rich protein 2E (Sprr2e), mRNA [NM_011471]	GO:0032355|GO:0003674|GO:0031424|GO:0005737|GO:0030216|GO:0008544|GO:0001533	NM_011471	Mm.261596	20759	ENSMUST00000068399	NP816717
A_52_P298801	1.59133e-05	3.36106	down	2227.04	1373.67	5.91271	4.1638	2229.43	2294.72	2156.95	1351.47	1391.57	1377.97	5.82177	5.86566	6.05071	4.1785	4.16647	4.14642	NM_018747	chr10:24890047-24889988	Akap7	Mus musculus A kinase (PRKA) anchor protein 7 (Akap7), mRNA [NM_018747]	GO:0005515|GO:0016208|GO:0005626|GO:0016324|GO:0043234|GO:0007178|GO:0034237|GO:0019904|GO:0019901|GO:0016529|GO:0032947|GO:0005634|GO:0016020|GO:0005624|GO:0008022|GO:0070382|GO:0051018|GO:0016301|GO:0030315|GO:0008104|GO:0010738|GO:0005625	NM_018747	Mm.477585	432442	ENSMUST00000041984	TC1627442
A_52_P646112	0.0110395	1.60872	down	593.097	763.427	4.00209	3.31618	575.384	563.449	640.457	781.995	760.87	747.418	3.8677	3.8397	4.29889	3.3892	3.29549	3.26385	BC011192	chr7:123475172-123475109	Rps13	Mus musculus ribosomal protein S13, mRNA (cDNA clone MGC:18694 IMAGE:4016679), complete cds. [BC011192]	GO:0005840|GO:0003735|GO:0008150|GO:0003674|GO:0006412|GO:0022627|GO:0030529|GO:0005622		Mm.345443	68052
A_52_P418724	0.00118416	1.84827	down	14449.1	16235.8	8.61028	7.72411	15011.6	13928	14407.7	15016.4	17521.9	16169	8.57311	8.46726	8.79048	7.65244	7.82085	7.69903	NM_001039147	chr9:89987122-89987063	Morf4l1	Mus musculus mortality factor 4 like 1 (Morf4l1), transcript variant 1, mRNA [NM_001039147]	GO:0006974|GO:0005634|GO:0005515|GO:0006350|GO:0016568|GO:0008283|GO:0006338|GO:0040008|GO:0003682|GO:0006281|GO:0045449|GO:0016585	NM_001039147	Mm.479140	21761	ENSMUST00000085248	TC1729182
A_51_P436020	0.0111904	2.13437	down	677.148	651.451	4.17942	3.08561	600.21	606.464	824.769	610.239	693.95	650.163	3.92864	3.94584	4.66377	3.03142	3.16267	3.06274	NM_025335	chr13:90246784-90246843	Tmem167	Mus musculus transmembrane protein 167 (Tmem167), mRNA [NM_025335]	GO:0016020|GO:0008150|GO:0003674|GO:0016021|GO:0005575	NM_025335	Mm.241387	66074
A_52_P501816	0.000256947	10.9774	down	8596.69	1679.61	7.86096	4.4045	8178.98	8782.27	8828.82	1108.89	2042.34	1887.6	7.69702	7.80194	8.08393	3.89308	4.71999	4.60042	NM_020049	chrX:21318999-21319058	Slc6a14	Mus musculus solute carrier family 6 (neurotransmitter transporter), member 14 (Slc6a14), mRNA [NM_020049]	GO:0005275|GO:0015293|GO:0005887|GO:0016020|GO:0008150|GO:0006836|GO:0031526|GO:0006865|GO:0016021|GO:0006810|GO:0005328	NM_020049	Mm.253984	56774	ENSMUST00000033414	TC1585738
A_52_P451834	0.00743883	2.29736	down	862.829	789.94	4.54078	3.3408	776.423	872.203	939.861	596.174	923.309	850.336	4.30002	4.47008	4.85223	2.99777	3.57465	3.44997	NM_183262	chr2:129657941-129658000	Stk35	Mus musculus serine/threonine kinase 35 (Stk35), transcript variant 1, mRNA [NM_183262]	GO:0004672|GO:0005634|GO:0008150|GO:0004674|GO:0003674|GO:0005524|GO:0016740|GO:0016301|GO:0006468|GO:0005737|GO:0000166|GO:0005575	NM_183262	Mm.389329	67333	ENSMUST00000099380	TC1640162
A_52_P435705	0.00909403	1.88283	down	283.141	317.175	2.93401	2.0211	283.517	307.514	258.392	233.504	357.809	360.212	2.84661	2.96607	2.98934	1.64549	2.20702	2.21079	BC051457	chr14:65431582-65431523	Hmbox1	Mus musculus homeobox containing 1, mRNA (cDNA clone MGC:56991 IMAGE:6398463), complete cds. [BC051457]	GO:0005634|GO:0043565|GO:0003700|GO:0008150|GO:0006350|GO:0003674|GO:0003677|GO:0006355|GO:0005575|GO:0045449		Mm.344074	219150		TC1582146
A_51_P494293	1.0689e-05	4.43128	down	2216.53	1035.34	5.90367	3.75595	2133.48	2409.68	2106.45	1034.5	1027.76	1043.77	5.75831	5.93618	6.01652	3.7929	3.72927	3.74567	NR_024325	chr1:57031318-57031377	9130024F11Rik	Mus musculus RIKEN cDNA 9130024F11 gene (9130024F11Rik), non-coding RNA [NR_024325]	GO:0008150|GO:0003674|GO:0005575	NR_024325	Mm.419039	329160
A_51_P183400	0.0130833	2.31749	down	4837.38	4250.35	7.00579	5.79323	4323.79	4010.82	6177.54	4284.34	4318.5	4148.22	6.7774	6.67124	7.56874	5.84304	5.80029	5.73636	NM_146194	chr7:97357096-97357155	Picalm	Mus musculus phosphatidylinositol binding clathrin assembly protein (Picalm), mRNA [NM_146194]	GO:0030136|GO:0006897|GO:0005886|GO:0030097|GO:0007275|GO:0017124|GO:0048813|GO:0005545|GO:0005905|GO:0048268|GO:0030118|GO:0031410|GO:0016020|GO:0048471|GO:0045202|GO:0030276|GO:0006898|GO:0005543|GO:0007409|GO:0005622|GO:0005794	NM_146194	Mm.235175	233489	ENSMUST00000049537	TC1588708
A_51_P353914	1.85897e-06	5.85613	down	311.502	109.932	3.06929	0.519345	327.999	334.333	272.174	115.997	105.185	108.614	3.05687	3.0867	3.06431	0.636131	0.440759	0.481146	NM_008319	chr9:20843419-20843478	Icam5	Mus musculus intercellular adhesion molecule 5, telencephalin (Icam5), mRNA [NM_008319]	GO:0005515|GO:0016020|GO:0007155|GO:0016337|GO:0005886|GO:0006909|GO:0016021	NM_008319	Mm.4629	15898	ENSMUST00000019616	TC1583704
A_52_P574291	0.0045119	1.75344	down	244.449	290.516	2.72366	1.91348	261.229	229.839	242.279	246.915	322.127	302.506	2.72849	2.54604	2.89645	1.72606	2.05547	1.9589	AK015681	chr5:75401997-75401938	Chic2	Mus musculus adult male testis cDNA, RIKEN full-length enriched library, clone:4930502K01 product:cysteine-rich hydrophobic domain 2, full insert sequence. [AK015681]	GO:0016020|GO:0006893|GO:0003674|GO:0005886|GO:0005798|GO:0005794		Mm.239814	74277		TC1622521
A_51_P465211	0.000536859	2.65967	down	39330	30305	10.0359	8.62464	48695.9	35783.1	33511	28710.1	32945.6	29259.2	10.2708	9.82855	10.0083	8.58746	8.73178	8.55469	NM_026323	chr2:164393935-164393994	Wfdc2	Mus musculus WAP four-disulfide core domain 2 (Wfdc2), mRNA [NM_026323]	GO:0005576|GO:0008150|GO:0003674|GO:0004867|GO:0030414|GO:0005575	NM_026323	Mm.27289	67701	ENSMUST00000109343	TC1579380
A_51_P199364	0.000114122	1.82026	down	6311.66	7150.96	7.40782	6.54367	7074.66	6410.84	5449.47	7328.9	7169.98	6953.99	7.48776	7.34786	7.38783	6.61757	6.53173	6.48171	NM_016903	chr14:75143070-75143129	Esd	Mus musculus esterase D/formylglutathione hydrolase (Esd), mRNA [NM_016903]	GO:0031410|GO:0016787|GO:0004091|GO:0018738|GO:0005737|GO:0016023|GO:0016788	NM_016903	Mm.38055	13885	ENSMUST00000022573	TC1731594
A_51_P327496	0.00228198	1.70965	down	34.2148	41.1566	-0.127192	-0.900892	34.0998	40.4728	28.0719	40.4144	37.7918	45.2634	-0.208992	0.0404372	-0.21302	-0.885017	-1.03602	-0.781641		chr9:046050751-046050803
A_51_P414915	1.4259e-05	5.10254	down	26691.9	10807	9.48745	7.13623	28842.4	28618.4	22614.9	11878.8	10131.5	10410.8	9.51522	9.50621	9.44091	7.31428	7.03054	7.06387	NM_008585	chr17:43611796-43611737	Mep1a	Mus musculus meprin 1 alpha (Mep1a), mRNA [NM_008585]	GO:0006508|GO:0016787|GO:0046872|GO:0016020|GO:0005624|GO:0004222|GO:0017090|GO:0008270|GO:0008233|GO:0008237|GO:0016021	NM_008585	Mm.5346	17287	ENSMUST00000117137	TC1574647
A_51_P396351	0.0303131	1.71494	down	10132.7	12132	8.08404	7.30588	8794.02	9384.75	12219.5	11690.9	12071.4	12633.6	7.80162	7.89766	8.55282	7.29129	7.28329	7.34307	NM_011045	chr2:132075557-132075420	Pcna	Mus musculus proliferating cell nuclear antigen (Pcna), mRNA [NM_011045]	GO:0006886|GO:0005515|GO:0006275|GO:0043626|GO:0000307|GO:0005657|GO:0005634|GO:0003677|GO:0005652|GO:0033993|GO:0030337|GO:0006260|GO:0006287	NM_011045	Mm.7141	18538	ENSMUST00000028817	TC1573145
A_51_P411019	0.000380805	1.67684	down	5977.81	7389.26	7.33653	6.59078	6195.57	6087.46	5650.4	7560.84	7492.28	7114.64	7.29634	7.27318	7.44006	6.66252	6.59517	6.51466	NM_175145	chr2:127086343-127086402	Tmem127	Mus musculus transmembrane protein 127 (Tmem127), mRNA [NM_175145]	GO:0016020|GO:0008150|GO:0003674|GO:0016021|GO:0005575	NM_175145	Mm.200889	69470	ENSMUST00000035871	TC1771818
A_51_P199634	0.00965154	1.70695	down	47.9916	57.0204	0.341852	-0.429571	59.3102	50.0545	34.61	61.0907	52.169	57.8014	0.589526	0.346987	0.0890427	-0.288933	-0.570899	-0.428883	NM_183318	chrX:99261971-99261912	Rgag4	Mus musculus retrotransposon gag domain containing 4 (Rgag4), transcript variant 1, mRNA [NM_183318]	GO:0008150|GO:0003674|GO:0005575	NM_183318	Mm.23297	331474	ENSMUST00000113631	TC1582873
A_52_P166952	0.000190041	1.71884	down	377.377	453.627	3.34444	2.563	417.605	388.626	325.9	429.426	490.796	440.66	3.40531	3.3038	3.32421	2.52445	2.66296	2.50161	NM_001135001	chr12:111809112-111809171	Ppp2r5c	Mus musculus protein phosphatase 2, regulatory subunit B (B56), gamma isoform (Ppp2r5c), transcript variant 4, mRNA [NM_001135001]	GO:0005634|GO:0005515|GO:0000775|GO:0043161|GO:0008601|GO:0005488|GO:0000159|GO:0007165	NM_001135001	Mm.240396	26931		TC1599287
A_51_P134627	0.000588367	3.27927	down	1272.62	805.358	5.10203	3.38866	1282.01	1155.4	1380.46	730.887	892.988	792.2	5.02351	4.87573	5.40686	3.29169	3.52648	3.34781	NM_080857	chr13:3650835-3650894	Asb13	Mus musculus ankyrin repeat and SOCS box-containing 13 (Asb13), transcript variant 2, mRNA [NM_080857]	GO:0008150|GO:0003674|GO:0005575	NM_080857	Mm.253061	142688	ENSMUST00000042288	TC1582717
A_52_P24280	0.000292244	2.02274	down	671.988	689.12	4.18448	3.16817	672.265	680.552	663.148	673.441	715.393	678.526	4.0922	4.11212	4.34911	3.17359	3.20657	3.12434	NM_018811	chr7:86505199-86505258	Abhd2	Mus musculus abhydrolase domain containing 2 (Abhd2), mRNA [NM_018811]	GO:0009611|GO:0030336|GO:0016787|GO:0016020|GO:0004091|GO:0016021	NM_018811	Mm.365490	54608	ENSMUST00000037315	TC1581075
A_51_P280437	1.81964e-05	3.69482	down	2975.73	1673.21	6.33007	4.44456	3105.74	3008.82	2812.62	1508.64	1799.39	1711.58	6.30004	6.25654	6.43363	4.33722	4.53727	4.4592	NM_133649	chr2:112202989-112203048	Slc12a6	Mus musculus solute carrier family 12, member 6 (Slc12a6), transcript variant 2, mRNA [NM_133649]	GO:0005515|GO:0005215|GO:0008150|GO:0055085|GO:0016324|GO:0030424|GO:0015377|GO:0006810|GO:0006821|GO:0015293|GO:0016020|GO:0006814|GO:0006811|GO:0016021|GO:0006813|GO:0016323	NM_133649	Mm.479575	107723	ENSMUST00000028549	TC1603477
A_51_P364996	0.014465	2.06142	down	34.5548	35.6449	-0.0978789	-1.14152	32.9709	34.646	36.0473	25.1414	43.2073	38.5859	-0.257561	-0.183823	0.147748	-1.56982	-0.842816	-1.01191	AK045584	chr14:99472272-99472213		Mus musculus adult male corpora quadrigemina cDNA, RIKEN full-length enriched library, clone:B230213G13 product:unclassifiable, full insert sequence. [AK045584]			Mm.441261			TC1616337
A_51_P183107	6.41491e-05	2.67388	down	130.007	100.431	1.80614	0.387202	148.934	126.688	114.4	91.8574	102.454	106.98	1.91785	1.6867	1.81387	0.29951	0.402813	0.459282	NM_175226	chr15:58732256-58732315	Rnf139	Mus musculus ring finger protein 139 (Rnf139), mRNA [NM_175226]	GO:0005515|GO:0004872|GO:0046872|GO:0016020|GO:0008150|GO:0003674|GO:0008270|GO:0016021|GO:0005575|GO:0005783|GO:0016874	NM_175226	Mm.4537	75841		TC1576740
A_51_P390496	0.000157471	1.8644	down	6343.91	7052.5	7.42262	6.52391	6435.84	6543.39	6052.5	7124.86	6941.25	7091.4	7.35123	7.37738	7.53924	6.57683	6.48496	6.50994	NM_139308	chr2:127124280-127124339	Stard7	Mus musculus START domain containing 7 (Stard7), mRNA [NM_139308]	GO:0008150|GO:0003674|GO:0005739|GO:0005575	NM_139308	Mm.41271	99138	ENSMUST00000069099	TC1572556
A_52_P38627	7.23956e-05	4.06538	down	440.287	220.275	3.54626	1.52287	500.921	496.16	323.782	221.414	213.622	225.79	3.66776	3.65622	3.3148	1.56879	1.46289	1.53692	NM_010113	chr3:129380885-129380826	Egf	Mus musculus epidermal growth factor (Egf), mRNA [NM_010113]	GO:0060749|GO:0005154|GO:0005576|GO:0005886|GO:0000186|GO:0005615|GO:0050730|GO:0050708|GO:0048754|GO:0008083|GO:0005509|GO:0016020|GO:0021940|GO:0007173|GO:0016021|GO:0005625|GO:0008284|GO:0018108	NM_010113	Mm.252481	13645	ENSMUST00000029653	TC1576243
A_52_P360070	0.000164037	12.7776	down	233.224	36.5838	2.59595	-1.0796	297.724	255.072	146.876	43.6261	32.5009	33.6244	2.91715	2.69632	2.17439	-0.774694	-1.25361	-1.21048	AK050393	chr1:60578577-60578518	C730045O03Rik	Mus musculus adult male liver tumor cDNA, RIKEN full-length enriched library, clone:C730043J07 product:unclassifiable, full insert sequence. [AK050393]	GO:0008150|GO:0003674|GO:0005575		Mm.438713	320310		TC1598709
A_52_P64514	0.0227098	1.86159	down	180.829	200.432	2.27571	1.37918	177.766	150.478	214.242	172.58	221.485	207.231	2.17315	1.93497	2.71903	1.20931	1.51504	1.41318	NM_025992	chr6:57568608-57568667	Herc5	Mus musculus hect domain and RLD 5 (Herc5), mRNA [NM_025992]	GO:0016567|GO:0030332|GO:0004842|GO:0005737	NM_025992	Mm.297393	67138	ENSMUST00000089907	TC1659254
A_52_P403097	0.00193228	2.32155	down	1411.8	1262.11	5.25263	4.03754	1361.63	1333.39	1540.39	1135.98	1364.8	1285.55	5.11044	5.08244	5.565	3.9279	4.13845	4.04626	NM_170588	chr2:155897949-155897890	Cpne1	Mus musculus copine I (Cpne1), transcript variant 1, mRNA [NM_170588]	GO:0008150|GO:0001786|GO:0005575	NM_170588	Mm.27660	266692	ENSMUST00000109607	TC1609117
A_52_P405876	7.79211e-05	2.27733	down	191.297	174.232	2.3708	1.18346	196.771	196.432	180.688	173.148	184.433	165.115	2.31969	2.31944	2.47328	1.21405	1.25093	1.08541	NM_001105557	chr10:81688314-81688255	B230315N10Rik	Mus musculus RIKEN cDNA B230315N10 gene (B230315N10Rik), mRNA [NM_001105557]	GO:0046872|GO:0008150|GO:0003674|GO:0005575	NM_001105557		237411	ENSMUST00000156218	TC1592227
A_51_P249989	0.00362423	2.1338	down	3195.11	3101.56	6.42892	5.33549	2879.05	3176.28	3529.99	2807.19	3252.09	3245.39	6.19069	6.33468	6.76137	5.2331	5.39113	5.38226	NM_145133	chr3:127500779-127500838	Tifa	Mus musculus TRAF-interacting protein with forkhead-associated domain (Tifa), mRNA [NM_145133]	GO:0005515|GO:0007249|GO:0005575	NM_145133	Mm.31852	211550	ENSMUST00000054483	TC1578687
A_51_P286321	0.00365001	1.72979	down	10936.8	13111.7	8.20811	7.41751	11252.6	10350.8	11206.8	13843.9	12849.9	12641.3	8.15729	8.03902	8.42802	7.53515	7.37344	7.34394	NM_026760	chr8:87553968-87554027	2310036O22Rik	Mus musculus RIKEN cDNA 2310036O22 gene (2310036O22Rik), mRNA [NM_026760]	GO:0008150|GO:0003674|GO:0005575	NM_026760	Mm.196005	68544	ENSMUST00000047281	TC1637030
A_52_P172453	0.00822789	1.69747	down	108.124	132.078	1.54561	0.782228	98.4795	110.458	115.434	120.387	140.623	135.224	1.32107	1.48891	1.82685	0.689725	0.859663	0.797296	AK033182	chr11:23356481-23356540		ubiquitin specific peptidase 34 Gene [Source:MGI Symbol;Acc:MGI:109473] [ENSMUST00000130131]			Mm.119155		ENSMUST00000130131	TC1597778
A_51_P141123	0.00234379	2.31379	down	115018	103434	11.6025	10.3922	111066	112016	121971	117142	98234.1	94926.5	11.4604	11.4749	11.8721	10.6161	10.3079	10.2526	NM_009942	chr1:36750107-36750166	Cox5b	Mus musculus cytochrome c oxidase, subunit Vb (Cox5b), nuclear gene encoding mitochondrial protein, mRNA [NM_009942]	GO:0046872|GO:0016020|GO:0005739|GO:0005743|GO:0005740|GO:0004129	NM_009942	Mm.180182	12859	ENSMUST00000081180	TC1698960
A_51_P497985	0.0423298	1.83782	down	1633.2	1727.19	5.37173	4.49373	2409.05	1497.36	993.202	1758.25	1763.64	1659.68	5.93356	5.24977	4.93187	4.55811	4.50832	4.41477	NM_013484	chr17:34999634-34999575	C2	Mus musculus complement component 2 (within H-2S) (C2), mRNA [NM_013484]	GO:0006508|GO:0006958|GO:0005576|GO:0005515|GO:0004252|GO:0016787|GO:0008236|GO:0008233|GO:0045087|GO:0006956|GO:0003824	NM_013484	Mm.283217	12263	ENSMUST00000148431	TC1576353
A_51_P435428	0.00216392	4.63992	down	1307.49	578.214	5.1137	2.8996	949.777	1427.71	1544.97	461.937	646.478	626.227	4.59076	5.18105	5.56929	2.62974	3.06044	3.00863	NM_010758	chr7:31684290-31684231	Mag	Mus musculus myelin-associated glycoprotein (Mag), mRNA [NM_010758]	GO:0043220|GO:0005515|GO:0016020|GO:0007155|GO:0005529|GO:0043209|GO:0033270|GO:0016021	NM_010758	Mm.241355	17136	ENSMUST00000040548	TC1581023
A_51_P478003	0.0191781	1.83414	down	828.948	928.903	4.4736	3.5985	779.071	717.269	990.503	882.452	962.007	942.25	4.30493	4.18793	4.92794	3.56356	3.63388	3.59805	NM_172555	chr11:23762994-23762935	Papolg	Mus musculus poly(A) polymerase gamma (Papolg), mRNA [NM_172555]	GO:0006350|GO:0008150|GO:0005524|GO:0016740|GO:0031123|GO:0003723|GO:0000166|GO:0006397|GO:0005634|GO:0003674|GO:0043631|GO:0004652|GO:0016779|GO:0005575	NM_172555	Mm.61064	216578	ENSMUST00000020513	TC1578254
A_52_P54569	0.00116359	2.10025	down	431.416	416.931	3.51416	2.44359	485.002	496.9	312.347	421.395	408.347	421.049	3.62116	3.65837	3.26293	2.49722	2.39763	2.43593	NM_001165980	chr2:70928103-70928162	Dcaf17	Mus musculus DDB1 and CUL4 associated factor 17 (Dcaf17), transcript variant 1, mRNA [NM_001165980]	GO:0005634|GO:0016020|GO:0008150|GO:0003674|GO:0016021|GO:0005575	NM_001165980	Mm.440766	75763	ENSMUST00000112167	TC1600999
A_51_P350073	1.23563e-05	2.74507	down	3670.73	2750.31	6.62178	5.16494	4177.14	3789.85	3045.19	2648.35	2820.58	2782	6.72762	6.58948	6.54824	5.14907	5.18576	5.15999	NM_023668	chr11:68635097-68635038	Ndel1	Mus musculus nuclear distribution gene E-like homolog 1 (A. nidulans) (Ndel1), mRNA [NM_023668]	GO:0021955|GO:0007399|GO:0005875|GO:0043014|GO:0030154|GO:0000226|GO:0070012|GO:0006810|GO:0001833|GO:0005635|GO:0001764|GO:0031252|GO:0051642|GO:0005856|GO:0031175|GO:0000776|GO:0047496|GO:0005515|GO:0016477|GO:0032864|GO:0007275|GO:0005874|GO:0060052|GO:0051081|GO:0030424|GO:0008017|GO:0048487|GO:0008090|GO:0005737|GO:0005813|GO:0060053|GO:0048680	NM_023668	Mm.31979	83431	ENSMUST00000018880	TC1572502
A_51_P258698	0.00266623	2.3009	down	1650.76	1482.66	5.47564	4.27345	1572.32	1523.19	1856.76	1441.76	1463.82	1542.39	5.318	5.27444	5.8345	4.2718	4.2395	4.30904	NM_001113354	chrX:148068241-148068300	Phf8	Mus musculus PHD finger protein 8 (Phf8), transcript variant 2, mRNA [NM_001113354]	GO:0005515|GO:0006350|GO:0008150|GO:0016491|GO:0051864|GO:0045449|GO:0005634|GO:0003674|GO:0046872|GO:0016568|GO:0008270|GO:0016702|GO:0005575|GO:0055114	NM_001113354	Mm.17156	320595	ENSMUST00000046950	TC1601215
A_51_P132685	0.0011172	3.56471	down	78.8081	45.7762	1.07097	-0.762815	70.9554	98.5308	66.9382	46.3226	36.4613	54.5447	0.848157	1.32406	1.04068	-0.688168	-1.08773	-0.51255	NM_007433	chr1:88984270-88984099	Alppl2	Mus musculus alkaline phosphatase, placental-like 2 (Alppl2), mRNA [NM_007433]	GO:0016787|GO:0046872|GO:0016020|GO:0004035|GO:0008152|GO:0005886|GO:0016791|GO:0016021|GO:0003824|GO:0031225	NM_007433	Mm.195224	11650	ENSMUST00000027455	TC1575753
A_52_P230688	0.00258003	1.72282	down	16813.6	20233	8.82598	8.04121	18525.1	16017.9	15897.9	21932.7	18584.3	20182.1	8.87651	8.66896	8.93247	8.19898	7.90577	8.01887	NM_025620	chr6:146981900-146981959	Rep15	Mus musculus RAB15 effector protein (Rep15), mRNA [NM_025620]	GO:0016020|GO:0008150|GO:0003674|GO:0005768|GO:0005575	NM_025620	Mm.45888	66532	ENSMUST00000036194	TC1586784
A_52_P240453	0.0131967	1.77155	down	1277.59	1488.47	5.10414	4.27913	1165.02	1205.96	1461.78	1443.07	1544.33	1478.01	4.88545	4.93753	5.48944	4.27312	4.31675	4.24753	NM_025901	chr2:181604769-181604828	Polr3k	Mus musculus polymerase (RNA) III (DNA directed) polypeptide K (Polr3k), mRNA [NM_025901]	GO:0030528|GO:0003676|GO:0005634|GO:0046872|GO:0006350|GO:0003899|GO:0003677|GO:0008270|GO:0045087|GO:0045449|GO:0009615	NM_025901	Mm.306482	67005	ENSMUST00000039551	TC1576667
A_51_P369862	0.00733524	1.83901	down	3778.24	4245.2	6.67048	5.79155	3791.58	3377.28	4165.86	4325.17	4177.36	4233.07	6.5879	6.4232	7.00033	5.85673	5.75235	5.76557	NM_178772	chr3:27143709-27143768	Nceh1	Mus musculus arylacetamide deacetylase-like 1 (Nceh1), mRNA [NM_178772]	GO:0005792|GO:0016042|GO:0042301|GO:0016787|GO:0016020|GO:0008152|GO:0004091|GO:0006805|GO:0017171|GO:0016021|GO:0006470|GO:0005783	NM_178772	Mm.24576	320024	ENSMUST00000046515	TC1763056
A_51_P457706	0.000680026	4.27972	down	200.754	98.0226	2.43227	0.334752	181.46	233.509	187.295	119.047	78.8667	96.1536	2.20283	2.56889	2.52509	0.673578	0.0253248	0.305353	AK029804	chr2:136387638-136387697	Ankrd5	ankyrin repeat domain 5 Gene [Source:MGI Symbol;Acc:MGI:2441685] [ENSMUST00000028726]	GO:0008150|GO:0003674|GO:0005575		Mm.477841	319196	ENSMUST00000028726	TC1587049
A_52_P198916	8.18694e-05	2.3683	down	1914.11	1673.29	5.69216	4.44831	2072.97	1866.16	1803.21	1715.54	1661.3	1643.03	5.7168	5.56741	5.79228	4.52263	4.42208	4.40023	NM_153091	chr3:104729424-104729483	St7l	Mus musculus sdownpression of tumorigenicity 7-like (St7l), mRNA [NM_153091]	GO:0016020|GO:0008150|GO:0003674|GO:0016021|GO:0005575	NM_153091	Mm.206379	229681	ENSMUST00000098765	TC1580159
A_51_P467284	0.00296689	3.09909	down	285.407	190.374	2.92654	1.29469	233.708	355.669	266.843	210.1	149.582	211.439	2.56788	3.17595	3.03578	1.49312	0.948774	1.44218	NM_008561	chr2:172074725-172074784	Mc3r	Mus musculus melanocortin 3 receptor (Mc3r), mRNA [NM_008561]	GO:0004980|GO:0004872|GO:0005515|GO:0004930|GO:0005886|GO:0007186|GO:0007165|GO:0007188|GO:0016020|GO:0004871|GO:0004977|GO:0016021|GO:0017046	NM_008561	Mm.57183	17201	ENSMUST00000038532	TC1590696
A_52_P671329	0.00207338	2.39569	down	3012.79	2600.06	6.34453	5.08409	2824.55	2854.55	3359.28	2677.68	2556.67	2565.83	6.16312	6.1806	6.68986	5.16495	5.04403	5.04329	NM_133766	chr15:65704771-65704830	Efr3a	Mus musculus EFR3 homolog A (S. cerevisiae) (Efr3a), mRNA [NM_133766]	GO:0016020|GO:0016337|GO:0005886|GO:0005488|GO:0042803|GO:0001533|GO:0005622	NM_133766	Mm.260647	76740	ENSMUST00000015146	TC1607495
A_52_P156314	4.55211e-05	3.30012	down	44.2648	27.6584	0.24926	-1.47326	50.5858	44.8625	37.346	27.862	29.7171	25.396	0.359979	0.188995	0.198808	-1.42159	-1.3828	-1.61539	NM_207707	chr12:77222370-77222311	Esr2	Mus musculus estrogen receptor 2 (beta) (Esr2), transcript variant 1, mRNA [NM_207707]	GO:0006350|GO:0043204|GO:0001541|GO:0003707|GO:0045449|GO:0045885|GO:0005634|GO:0001662|GO:0046872|GO:0001764|GO:0004879|GO:0003677|GO:0008270|GO:0042562|GO:0008285|GO:0004872|GO:0003700|GO:0050680|GO:0060065|GO:0007420|GO:0045944|GO:0005739|GO:0006355|GO:0060740|GO:0033574|GO:0060068|GO:0043065|GO:0042127|GO:0008289|GO:0043565|GO:0007611|GO:0043526|GO:0043005|GO:0060743|GO:0030520|GO:0005737|GO:…	NM_207707	Mm.2561	13983	ENSMUST00000076634	NP723042
A_51_P287221	0.0155711	2.12588	down	45.396	44.4148	0.277425	-0.810638	37.3285	55.4209	43.4388	52.1184	33.85	47.2759	-0.0784783	0.493916	0.416839	-0.518094	-1.19494	-0.718884	AB006034	chr10:126489764-126489821	Cyp27b1	Mus musculus mRNA for 25-hydroxyvitamin D3 1alpha-hydroxylase, partial cds. [AB006034]	GO:0006816|GO:0007568|GO:0004498|GO:0005739|GO:0016491|GO:0032868|GO:0033280|GO:0051591|GO:0042369|GO:0042493|GO:0005506|GO:0046688|GO:0009055|GO:0046872|GO:0042359|GO:0016020|GO:0020037|GO:0004497|GO:0034695|GO:0055114		Mm.6216	13115		TC1598646
A_52_P295906	0.00173544	2.36239	down	3940.47	3447.34	6.7316	5.49135	4001.79	3522.79	4296.84	3453.84	3446.21	3441.97	6.66575	6.48406	7.04499	5.53217	5.47477	5.4671	AK049081	chr18:31943165-31943224	Ammecr1l	Mus musculus 0 day neonate cerebellum cDNA, RIKEN full-length enriched library, clone:C230097H06 product:unclassifiable, full insert sequence. [AK049081]	GO:0008150|GO:0003674|GO:0005575		Mm.392058	225339		TC1599217
A_51_P301975	0.000319518	1.69986	down	207.854	253.421	2.48915	1.72374	207.372	223.189	193	242.773	271.065	246.426	2.39539	2.50368	2.56838	1.70165	1.80647	1.66309	U89424	chr19:003943608-003943667	Unc93b1	Mus musculus strain BALB/c unc-93 related protein mRNA, partial cds. [U89424]	GO:0002224|GO:0016020|GO:0003674|GO:0019886|GO:0016021|GO:0005783		Mm.262094	54445
A_51_P306017	7.45145e-07	3.557	down	1210.14	703.98	5.02892	3.19826	1304.9	1240.43	1085.1	663.567	723.637	724.736	5.04904	4.97818	5.05954	3.15228	3.2231	3.2194	NM_007865	chr17:15504682-15504623	Dll1	Mus musculus delta-like 1 (Drosophila) (Dll1), mRNA [NM_007865]	GO:0007399|GO:0042472|GO:0005886|GO:0009887|GO:0030154|GO:0031410|GO:0016020|GO:0045596|GO:0007368|GO:0005112|GO:0045608|GO:0007386|GO:0009912|GO:0016021|GO:0001756|GO:0005515|GO:0042491|GO:0007275|GO:0001701|GO:0001757|GO:0048839|GO:0007154|GO:0005509|GO:0042475|GO:0007219	NM_007865	Mm.4875	13388	ENSMUST00000014917	TC1582472
A_52_P179521	0.0101357	2.1114	down	71.8668	70.031	0.936444	-0.141753	58.8268	89.8063	66.9672	80.2108	58.7077	71.1746	0.57772	1.1903	1.04131	0.103909	-0.400543	-0.128626		chr4:147730504-147730563
A_51_P303147	0.00292751	2.22568	down	45.9696	42.5564	0.299038	-0.85521	40.5689	55.868	41.4719	48.1134	38.2831	41.2728	0.0416193	0.505507	0.349988	-0.633447	-1.01739	-0.914797	NM_026627	chr2:17918183-17918124	H2afb1	Mus musculus H2A histone family, member B1 (H2afb1), mRNA [NM_026627]	GO:0005634|GO:0003677|GO:0000786|GO:0005694	NM_026627	Mm.23887	68231	ENSMUST00000105001	TC1582452
A_52_P221804	0.00239742	3.24836	down	201.615	127.705	2.43208	0.732373	175.397	185.109	244.338	119.085	122.144	141.884	2.1538	2.23379	2.90866	0.674039	0.656424	0.866656	NM_030731	chr13:104991894-104991953	Trim23	Mus musculus tripartite motif-containing 23 (Trim23), mRNA [NM_030731]	GO:0005515|GO:0007264|GO:0005525|GO:0000166|GO:0005764|GO:0005634|GO:0006471|GO:0016020|GO:0046872|GO:0005737|GO:0008270|GO:0005622|GO:0005794	NM_030731	Mm.244190	81003	ENSMUST00000022225	TC1590525
A_52_P272945	0.0261494	1.55956	down	264.988	351.346	2.83617	2.19503	246.955	248.541	299.469	328.649	354.218	371.171	2.64742	2.6589	3.20219	2.13859	2.19247	2.25403	NM_023243	chr13:85353162-85353221	Ccnh	Mus musculus cyclin H (Ccnh), mRNA [NM_023243]	GO:0005634|GO:0008150|GO:0006350|GO:0004693|GO:0016301|GO:0007049|GO:0045449	NM_023243	Mm.18474	66671	ENSMUST00000022030	TC1577268
A_51_P512002	0.0193202	1.55917	down	9901.47	13154.2	8.06189	7.42111	9263.67	9518.68	10922.1	12138.7	13618.8	13705.3	7.87669	7.9181	8.39089	7.34551	7.45729	7.46053	NM_026395	chr4:154448600-154448541	Rer1	Mus musculus RER1 retention in endoplasmic reticulum 1 homolog (S. cerevisiae) (Rer1), mRNA [NM_026395]	GO:0016020|GO:0008150|GO:0003674|GO:0016021|GO:0005575|GO:0005794	NM_026395	Mm.241604	67830	ENSMUST00000030914	TC1728430
A_52_P549977	0.0173741	1.5328	down	1745.85	2320.2	5.53476	4.9186	2237.37	1552.69	1447.5	2183.22	2441.27	2336.11	5.8269	5.30212	5.47527	4.87043	4.97739	4.90797	NM_026455	chr8:74746236-74746295	Fam32a	Mus musculus family with sequence similarity 32, member A (Fam32a), mRNA [NM_026455]	GO:0008150|GO:0003674|GO:0005575	NM_026455	Mm.28327	67922	ENSMUST00000003123	TC1639054
A_51_P179480	0.0062647	1.78745	down	476.773	543.452	3.6619	2.824	428.751	610.665	390.904	515.785	584.392	530.18	3.44331	3.95579	3.5866	2.78881	2.91477	2.76842	NM_172450	chr17:29033393-29033340	4930539E08Rik	Mus musculus RIKEN cDNA 4930539E08 gene (4930539E08Rik), mRNA [NM_172450]	GO:0008150|GO:0003674|GO:0005575	NM_172450	Mm.248931	207819	ENSMUST00000062357	TC1586421
A_52_P125494	0.00427259	2.67192	down	50.4326	37.5253	0.382164	-1.03571	61.9571	58.5289	30.8119	33.3454	37.8796	41.351	0.652515	0.572634	-0.0786562	-1.1624	-1.03267	-0.912065	NM_199017	chr9:8022216-8022157	9230110C19Rik	Mus musculus RIKEN cDNA 9230110C19 gene (9230110C19Rik), mRNA [NM_199017]	GO:0008150|GO:0003674|GO:0005575	NM_199017	Mm.172430	234912	ENSMUST00000065291	TC1585720
A_52_P335892	0.0288807	1.87394	down	117.048	127.992	1.64183	0.735756	103.35	101.323	146.472	114.926	138.093	130.958	1.39071	1.36437	2.17041	0.622741	0.83348	0.751047	NM_001170849	chr6:38554841-38554900	Luc7l2	Mus musculus LUC7-like 2 (S. cerevisiae) (Luc7l2), transcript variant 3, mRNA [NM_001170849]	GO:0005515|GO:0046872	NM_001170849	Mm.276133	192196		TC1614613
A_51_P462533	0.00347934	2.6087	down	2816.99	2144.88	6.18954	4.80621	3519.12	3176.32	1755.52	2123.02	2085.12	2226.5	6.48032	6.3347	5.75361	4.83009	4.74989	4.83865	NM_173068	chr19:10525625-10525684	Syt7	Mus musculus synaptotagmin VII (Syt7), transcript variant 3, mRNA [NM_173068]	GO:0005215|GO:0001778|GO:0006810|GO:0005509|GO:0005764|GO:0050796|GO:0031410|GO:0046872|GO:0016020|GO:0005624|GO:0030054|GO:0045202|GO:0008021|GO:0016021|GO:0017158	NM_173068	Mm.182654	54525		TC1763047
A_51_P384879	0.00153717	1.9657	down	51292.6	54053.3	10.4368	9.46178	47672.3	53728.2	52477.1	55194.7	54674.8	52290.3	10.2402	10.415	10.6553	9.53043	9.46257	9.39234	NM_008617	chr5:136266157-136266216	Mdh2	Mus musculus malate dehydrogenase 2, NAD (mitochondrial) (Mdh2), nuclear gene encoding mitochondrial protein, mRNA [NM_008617]	GO:0005515|GO:0006108|GO:0005975|GO:0005488|GO:0005739|GO:0016491|GO:0006099|GO:0046554|GO:0043621|GO:0003824|GO:0006734|GO:0005743|GO:0006107|GO:0016615|GO:0008152|GO:0006096|GO:0005759|GO:0030060|GO:0016616|GO:0055114|GO:0044262	NM_008617	Mm.297096	17448	ENSMUST00000019323	TC1574012
A_51_P163587	0.0176956	1.76941	down	31503.6	36659.1	9.725	8.90174	27224.2	30784.2	36502.4	36668.2	37460.3	35848.8	9.43192	9.61146	10.1316	8.94043	8.91705	8.84772	NM_007808	chr6:50515314-50515255	Cycs	Mus musculus cytochrome c, somatic (Cycs), nuclear gene encoding mitochondrial protein, mRNA [NM_007808]	GO:0070469|GO:0005739|GO:0006123|GO:0042743|GO:0006810|GO:0043065|GO:0005506|GO:0006979|GO:0009055|GO:0008635|GO:0046872|GO:0005829|GO:0020037|GO:0006915|GO:0022900|GO:0005625	NM_007808	Mm.35389	13063	ENSMUST00000077766	TC1573177
A_51_P271591	0.00177755	1.92189	down	1019.45	1080.7	4.75717	3.81464	1174.75	1134.95	748.65	980.676	1131.24	1130.2	4.89746	4.84997	4.52407	3.71582	3.86766	3.86044	AK090305	chr13:54684028-54684087	Arl10	Mus musculus 8 days neonate male testis cDNA, RIKEN full-length enriched library, clone:G630043P18 product:unclassifiable, full insert sequence. [AK090305]	GO:0008150|GO:0003674|GO:0005525|GO:0000166|GO:0005575		Mm.89484	56795
A_51_P303180	0.000131988	2.12317	down	1692.3	1646.05	5.50929	4.42307	1867.42	1750.86	1458.63	1761.24	1568.39	1608.52	5.56615	5.4754	5.48633	4.56056	4.33905	4.3696	NM_026667	chr5:65432023-65432082	Fam114a1	Mus musculus family with sequence similarity 114, member A1 (Fam114a1), mRNA [NM_026667]	GO:0008150|GO:0003674|GO:0005737|GO:0005575	NM_026667	Mm.258545	68303	ENSMUST00000031080	TC1576498
A_52_P445584	0.000465061	1.84031	down	2583.44	2907.84	6.12569	5.24574	2759.76	2483.47	2507.1	2868.37	2937.27	2917.88	6.12964	5.9797	6.26773	5.2642	5.24424	5.22879	NM_023243	chr13:85352396-85352455	Ccnh	Mus musculus cyclin H (Ccnh), mRNA [NM_023243]	GO:0005634|GO:0008150|GO:0006350|GO:0004693|GO:0016301|GO:0007049|GO:0045449	NM_023243	Mm.18474	66671	ENSMUST00000022030	TC1673806
A_51_P155755	0.000208588	3.7325	down	144.439	80.4975	1.96494	0.064796	136.353	153.255	143.711	86.7471	70.2991	84.4462	1.79052	1.96135	2.14295	0.21693	-0.140587	0.118045	NM_183139	chr11:59597612-59597553	Pld6	Mus musculus phospholipase D family, member 6 (Pld6), mRNA [NM_183139]	GO:0016787|GO:0004630|GO:0016020|GO:0008150|GO:0003674|GO:0008152|GO:0070290|GO:0016021|GO:0005575|GO:0003824	NM_183139	Mm.344651	194908		TC1584626
A_52_P65513	0.00965217	3.08349	down	140.924	96.0238	1.91107	0.286511	109.425	153.442	159.904	113.53	66.6966	107.845	1.47312	1.96311	2.29699	0.605112	-0.21648	0.470901	NM_010213	chr4:124383226-124383285	Fhl3	Mus musculus four and a half LIM domains 3 (Fhl3), mRNA [NM_010213]	GO:0005634|GO:0046872|GO:0030018|GO:0030036|GO:0008270|GO:0003779|GO:0001725	NM_010213	Mm.331856	14201	ENSMUST00000145942	TC1589948
A_52_P354947	0.0185676	2.24665	down	191.441	173.06	2.34102	1.17324	167.317	156.818	250.188	162.36	184.494	172.327	2.08575	1.9945	2.9428	1.12124	1.25141	1.14709	AK045831	chr5:32776086-32776145	E230008O15Rik	Mus musculus adult male corpora quadrigemina cDNA, RIKEN full-length enriched library, clone:B230313E11 product:unclassifiable, full insert sequence. [AK045831]	GO:0008150|GO:0003674|GO:0005575		Mm.441931	319862		TC1597663
A_52_P305053	0.00282746	1.7622	down	54.6073	63.7938	0.552795	-0.264582	48.7959	64.0466	50.9796	63.8633	63.4975	64.0205	0.308004	0.702607	0.647775	-0.224898	-0.287394	-0.281455	NR_030695	chr4:141103547-141103606	B330016D10Rik	Mus musculus RIKEN cDNA B330016D10 gene (B330016D10Rik), non-coding RNA [NR_030695]	GO:0008150|GO:0003674|GO:0005575	NR_030695	Mm.32859	320456		TC1584481
A_51_P302852	9.2705e-06	7.05423	down	447.543	130.491	3.58291	0.764417	459.603	518.847	364.18	129.041	120.158	142.273	3.54356	3.72072	3.48443	0.789873	0.632773	0.870607	NM_183037	chr3:89039031-89038972	Trim46	Mus musculus tripartite motif-containing 46 (Trim46), transcript variant 2, mRNA [NM_183037]	GO:0005515|GO:0046872|GO:0008150|GO:0003674|GO:0008270|GO:0005575|GO:0005622	NM_183037	Mm.331156	360213	ENSMUST00000143637	TC1612368
A_52_P598634	0.000202882	1.69496	down	1915.42	2343.33	5.69353	4.93228	1935.28	2032.61	1778.37	2178.85	2362.83	2488.3	5.61765	5.69067	5.77227	4.86753	4.93028	4.99903	NM_001135567	chr10:82082933-82082874	1190007I07Rik	Mus musculus RIKEN cDNA 1190007I07 gene (1190007I07Rik), transcript variant 1, mRNA [NM_001135567]	GO:0008150|GO:0003674|GO:0005575	NM_001135567	Mm.334867	544717	ENSMUST00000079648	TC1599585
A_52_P477309	0.000459692	3.03291	down	133.947	91.3672	1.83926	0.238559	146.099	150.739	105.001	73.5222	102.561	98.019	1.89012	1.93747	1.69019	-0.0217071	0.404313	0.333073		chr14:120828235-120828176		Q5DTQ0_MOUSE (Q5DTQ0) MKIAA4072 protein (Fragment), partial (11%) [TC1779385]						TC1779385
A_52_P239742	0.000118698	1.67751	down	319.716	394.819	3.11038	2.36406	342.033	321.261	295.853	375.2	397.064	412.194	3.11731	3.02916	3.18466	2.3297	2.35721	2.40526	NM_001135577	chr13:41368187-41368246	BC024659	Mus musculus cDNA sequence BC024659 (BC024659), mRNA [NM_001135577]	GO:0008150|GO:0003674|GO:0005575	NM_001135577	Mm.38578	108934		TC1635606
A_52_P68028	4.8871e-05	4.36817	down	879.075	411.246	4.54886	2.42183	1012.22	956.397	668.606	417.169	381.765	434.805	4.68263	4.60302	4.36094	2.48267	2.30052	2.48231	NM_009598	chr11:105850398-105850457	Ace	Mus musculus angiotensin I converting enzyme (peptidyl-dipeptidase A) 1 (Ace), transcript variant 2, mRNA [NM_009598]	GO:0004180|GO:0005576|GO:0005886|GO:0042277|GO:0008233|GO:0006518|GO:0006508|GO:0016787|GO:0046872|GO:0016020|GO:0008217|GO:0008241|GO:0042447|GO:0008237|GO:0016021	NM_009598	Mm.754	11421	ENSMUST00000001964	TC1578619
A_52_P476935	0.00370648	1.59145	down	742.383	956.445	4.31126	3.64092	697.998	901.635	627.516	915.958	985.737	967.64	4.1464	4.51796	4.26943	3.61732	3.66904	3.63641	NM_178382	chr2:140485208-140485149	Flrt3	Mus musculus fibronectin leucine rich transmembrane protein 3 (Flrt3), transcript variant 2, mRNA [NM_178382]	GO:0016021	NM_178382	Mm.426781	71436	ENSMUST00000056760	TC1637606
A_51_P251821	0.00521183	1.89061	down	110.407	118.258	1.5423	0.623451	120.494	132.781	77.9449	127.363	116.706	110.704	1.61213	1.75447	1.26031	0.770986	0.590719	0.508647	NM_008507	chr5:122268315-122268256	Sh2b3	Mus musculus SH2B adaptor protein 3 (Sh2b3), mRNA [NM_008507]	GO:0005515|GO:0042301|GO:0030097|GO:0035162|GO:0030154|GO:0004871|GO:0032403	NM_008507	Mm.65493	16923	ENSMUST00000118580	TC1630474
A_52_P42834	0.00164142	2.16206	down	967.795	927.896	4.70886	3.59645	936.5	927.018	1039.87	869.686	954.771	959.233	4.57045	4.55801	4.99811	3.54254	3.62299	3.62382	NM_013918	chr16:77115664-77115723	Usp25	Mus musculus ubiquitin specific peptidase 25 (Usp25), mRNA [NM_013918]	GO:0004843|GO:0004221|GO:0016787|GO:0006511|GO:0000502|GO:0008233|GO:0008234	NM_013918	Mm.40986	30940	ENSMUST00000060704	TC1576055
A_51_P449133	0.000358013	2.07821	down	1163.86	1161.71	4.97684	3.9215	1144.94	1182.35	1164.28	1116.42	1171.55	1197.16	4.86037	4.90899	5.16115	3.90285	3.91818	3.94348	NM_013464	chr12:36182983-36182924	Ahr	Mus musculus aryl-hydrocarbon receptor (Ahr), mRNA [NM_013464]	GO:0006350|GO:0046982|GO:0048608|GO:0006805|GO:0048732|GO:0045449|GO:0005667|GO:0005634|GO:0004879|GO:0003677|GO:0030850|GO:0045899|GO:0005515|GO:0004872|GO:0003700|GO:0006950|GO:0007049|GO:0006355|GO:0007165|GO:0006366|GO:0030528|GO:0043565|GO:0009410|GO:0045893|GO:0005737|GO:0004871|GO:0006915	NM_013464	Mm.341377	11622	ENSMUST00000110811
A_52_P389310	0.024377	2.50512	down	701.136	581.987	4.21281	2.88793	589.347	592.548	921.513	407.734	662.112	676.115	3.90229	3.91235	4.82379	2.44967	3.09491	3.11921	NM_017382	chr9:64563620-64563561	Rab11a	Mus musculus RAB11a, member RAS oncogene family (Rab11a), mRNA [NM_017382]	GO:0048169|GO:0005886|GO:0006184|GO:0007264|GO:0015031|GO:0055037|GO:0005525|GO:0005739|GO:0005768|GO:0000166|GO:0007049|GO:0003924|GO:0006810|GO:0030133|GO:0051223|GO:0016020|GO:0005802	NM_017382	Mm.1387	53869		TC1600915
A_51_P322542	0.000167472	1.89106	down	1201.82	1309.02	5.01061	4.09141	1279.81	1339.04	986.597	1193.59	1379.47	1353.99	5.02104	5.08855	4.92224	3.99928	4.15388	4.12108	NM_027444	chr16:50192365-50192306	Bbx	Mus musculus bobby sox homolog (Drosophila) (Bbx), mRNA [NM_027444]	GO:0005634|GO:0006350|GO:0003677|GO:0045449	NM_027444	Mm.28940	70508	ENSMUST00000138166	TC1600634
A_52_P21986	0.0348085	1.7058	down	242.486	303.43	2.71101	1.94056	252.867	253.884	220.706	204.781	364.279	341.23	2.68155	2.68958	2.76191	1.45612	2.23288	2.13269	NM_026062	chr5:108338571-108338512	Fam69a	Mus musculus family with sequence similarity 69, member A (Fam69a), mRNA [NM_026062]	GO:0005515|GO:0016020|GO:0008150|GO:0016021|GO:0005575	NM_026062	Mm.479552	67266	ENSMUST00000031198	TC1577868
A_51_P255329	0.00287521	1.83861	down	1470.53	1657.62	5.31321	4.43459	1438.42	1418.71	1554.45	1636.07	1712.18	1624.63	5.18958	5.17193	5.57811	4.4542	4.4656	4.38398	NM_025934	chr17:17530545-17530604	Riok2	Mus musculus RIO kinase 2 (yeast) (Riok2), mRNA [NM_025934]	GO:0004674|GO:0005524|GO:0016740|GO:0016301|GO:0006468|GO:0000166|GO:0003824	NM_025934	Mm.35117	67045	ENSMUST00000024620	TC1664084
A_51_P239673	0.00101839	2.39738	down	16640.8	14381.2	8.81243	7.55098	16478.5	15583.5	17860.4	13646	14888.2	14609.4	8.70761	8.62929	9.1004	7.51437	7.58586	7.55269	NM_013556	chrX:50374757-50374816	Hprt	Mus musculus hypoxanthine guanine phosphoribosyl transferase (Hprt), mRNA [NM_013556]	GO:0007625|GO:0006178|GO:0042802|GO:0006166|GO:0048813|GO:0046651|GO:0016757|GO:0046100|GO:0046872|GO:0021895|GO:0042417|GO:0002060|GO:0021756|GO:0045964|GO:0004422|GO:0016740|GO:0009116|GO:0021954|GO:0005737|GO:0007610|GO:0046083|GO:0019835|GO:0005625|GO:0006168|GO:0001975	NM_013556	Mm.299381	15452	ENSMUST00000026723	TC1571994
A_52_P679273	0.000249475	3.70389	down	104.693	58.8041	1.49756	-0.391484	95.1488	115.848	103.084	49.7362	61.733	64.9431	1.27143	1.55764	1.6636	-0.58559	-0.32805	-0.260811	AK036632	chr6:129164090-129164031	2310001H17Rik	Mus musculus adult male bone cDNA, RIKEN full-length enriched library, clone:9830143P17 product:unclassifiable, full insert sequence. [AK036632]	GO:0008150|GO:0003674|GO:0005575		Mm.261738	76432		TC1599568
A_51_P150555	0.00457116	1.60323	down	1920.95	2439.52	5.6729	4.99192	2304.51	2015.36	1442.99	2402.96	2533.85	2381.75	5.86956	5.67838	5.47077	5.00878	5.03109	4.93589	NM_053197	chr19:45130701-45130760	Sfxn3	Mus musculus sideroflexin 3 (Sfxn3), transcript variant 1, mRNA [NM_053197]	GO:0016020|GO:0008150|GO:0003674|GO:0055085|GO:0006811|GO:0006812|GO:0005739|GO:0031966|GO:0016021|GO:0006826|GO:0008324|GO:0006810	NM_053197	Mm.36169	94280	ENSMUST00000062213	TC1590239
A_52_P214966	0.00125	2.61062	down	404.14	322.079	3.44794	2.06355	414.148	368.632	429.641	276.141	348.713	341.383	3.39332	3.2276	3.72292	1.88745	2.16988	2.13333	NM_177730	chr4:4694458-4694399	Impad1	Mus musculus inositol monophosphatase domain containing 1 (Impad1), mRNA [NM_177730]	GO:0042733|GO:0001958|GO:0008254|GO:0002063|GO:0001501|GO:0030204|GO:0008934|GO:0009791|GO:0016787|GO:0046872|GO:0016020|GO:0004437|GO:0016021|GO:0005794	NM_177730	Mm.218889	242291	ENSMUST00000084949	TC1627939
A_51_P285190	0.00490041	1.69925	down	2355.86	2891.21	5.99425	5.22935	2331.81	2351.8	2383.96	2470.25	3148.06	3055.33	5.88655	5.90111	6.19507	5.04863	5.34423	5.29519	NM_001081251	chr14:31932917-31932976	Pbrm1	Mus musculus polybromo 1 (Pbrm1), mRNA [NM_001081251]	GO:0005634|GO:0005515|GO:0006350|GO:0016568|GO:0001890|GO:0003677|GO:0003682|GO:0007507|GO:0000776|GO:0045449	NM_001081251	Mm.27913	66923	ENSMUST00000022471	TC1685863
A_51_P220723	0.000531408	2.28147	down	2933.22	2650.75	6.3015	5.11153	3408.26	2686.3	2705.09	2763.85	2628.37	2560.02	6.43414	6.09296	6.37739	5.21065	5.08393	5.04002	NM_026592	chr2:101402384-101402325	B230118H07Rik	Mus musculus RIKEN cDNA B230118H07 gene (B230118H07Rik), mRNA [NM_026592]	GO:0008150|GO:0003674|GO:0005575	NM_026592	Mm.31263	68170	ENSMUST00000090513	NP1478299
A_51_P479833	0.00147669	2.35432	down	721.278	634.595	4.28151	3.0462	772.281	637.369	754.184	573.678	676.037	654.069	4.2923	4.01754	4.5347	2.94228	3.12494	3.07138	NM_001081473	chrX:91972970-91973029	Zxdb	Mus musculus zinc finger, X-linked, ddownlicated B (Zxdb), mRNA [NM_001081473]	GO:0003676|GO:0005634|GO:0046872|GO:0008150|GO:0006350|GO:0003674|GO:0008270|GO:0005575|GO:0045449|GO:0005622	NM_001081473	Mm.426145	668166	ENSMUST00000101388	TC1580099
A_52_P125253	1.03354e-05	8.27811	down	176.674	43.8903	2.24467	-0.804626	163.275	210.207	156.542	43.687	42.5292	45.4547	2.05047	2.41722	2.26633	-0.772682	-0.865637	-0.775559	NM_146630	chr17:37933191-37933250	Olfr123	Mus musculus olfactory receptor 123 (Olfr123), mRNA [NM_146630]	GO:0004872|GO:0004984|GO:0004930|GO:0007608|GO:0007186|GO:0004871|GO:0016021|GO:0007165	NM_146630	Mm.271474	258623	ENSMUST00000054748	TC1600193
A_52_P429534	0.000697094	1.58202	down	331.021	433.452	3.16116	2.49939	352.705	329.053	311.306	444.942	435.621	419.792	3.16164	3.06373	3.25811	2.57566	2.49091	2.43161	NM_010485	chr8:4285573-4285514	Elavl1	Mus musculus ELAV (embryonic lethal, abnormal vision, Drosophila)-like 1 (Hu antigen R) (Elavl1), mRNA [NM_010485]	GO:0003676|GO:0005634|GO:0005737|GO:0003730|GO:0003723|GO:0000166|GO:0048255	NM_010485	Mm.119162	15568		TC1608942
A_51_P505761	0.000224357	1.68533	down	2588.15	3165.57	6.12103	5.368	2605.8	2929.21	2229.45	3187.39	3073.48	3235.85	6.04683	6.21785	6.0984	5.41635	5.30963	5.37802	NM_027906	chr14:79601128-79601187	1300010F03Rik	Mus musculus RIKEN cDNA 1300010F03 gene (1300010F03Rik), transcript variant 1, mRNA [NM_027906]	GO:0005576|GO:0008150|GO:0003674|GO:0005524|GO:0017111|GO:0016887|GO:0005739|GO:0000166	NM_027906	Mm.159651	219189	ENSMUST00000040990	TC1583519
A_51_P331003	0.0111076	1.68276	down	6380.64	7684.15	7.3931	6.64226	7457.25	7252.54	4432.13	6774.84	8308.65	7968.95	7.56374	7.52583	7.08971	6.50416	6.74438	6.67826	NM_011976	chr19:45077642-45077701	Sema4g	Mus musculus sema domain, immunoglobulin domain (Ig), transmembrane domain (TM) and short cytoplasmic domain, (semaphorin) 4G (Sema4g), mRNA [NM_011976]	GO:0007399|GO:0004872|GO:0016020|GO:0007275|GO:0030154|GO:0016021	NM_011976	Mm.34404	26456	ENSMUST00000026225	TC1601644
A_51_P158007	0.000194969	2.38753	down	15196.5	13201.9	8.68351	7.42799	14881.3	15521.9	15186.3	12905.1	12980.6	13719.9	8.56053	8.62358	8.86641	7.43384	7.38805	7.46207	NM_133797	chr13:54652710-54652651	4833439L19Rik	Mus musculus RIKEN cDNA 4833439L19 gene (4833439L19Rik), mRNA [NM_133797]	GO:0008150|GO:0003674|GO:0005575	NM_133797	Mm.24593	97820	ENSMUST00000077007	TC1574000
A_51_P435817	0.00113179	1.59903	down	1090.36	1414.68	4.88227	4.20507	1073.75	1134.08	1063.24	1331.42	1456.4	1456.22	4.76776	4.84887	5.03017	4.15693	4.23217	4.2261	NM_028603	chr4:129031222-129031163	Zbtb8a	Mus musculus zinc finger and BTB domain containing 8a (Zbtb8a), mRNA [NM_028603]	GO:0005634|GO:0005515|GO:0046872|GO:0008150|GO:0006350|GO:0003674|GO:0003677|GO:0008270|GO:0005575|GO:0045449|GO:0005622	NM_028603	Mm.32997	73680	ENSMUST00000030610
A_51_P471819	9.82923e-06	2.68584	down	4209.03	3243.97	6.82846	5.40309	4373.3	4426.17	3827.61	3331.61	3277.43	3122.88	6.79382	6.8134	6.87815	5.48019	5.40233	5.32674	M77003	chr19:55142262-55142203		Mouse glycerol-3-phosphate acyltransferase mRNA, complete cds. [M77003]			Mm.210196			TC1707625
A_51_P167198	0.00372179	3.96745	down	73.7256	38.7102	0.969758	-1.01845	56.3415	90.3476	74.4877	46.3519	27.8712	41.9074	0.515445	1.19897	1.19486	-0.687258	-1.47532	-0.892783	NM_146985	chr2:89989406-89989347	Olfr1270	Mus musculus olfactory receptor 1270 (Olfr1270), mRNA [NM_146985]	GO:0004872|GO:0004984|GO:0004930|GO:0007608|GO:0007186|GO:0004871|GO:0016021|GO:0007165	NM_146985	Mm.223376	258987	ENSMUST00000099754	TC1656482
A_52_P1068094	0.0240685	1.818	down	70.4905	81.1794	0.918193	0.0558408	83.139	59.6508	68.6817	60.1671	93.9421	89.429	1.07677	0.600027	1.07778	-0.310912	0.277679	0.200755	AK037508	chr17:33238796-33238855		Mus musculus 16 days neonate thymus cDNA, RIKEN full-length enriched library, clone:A130022J21 product:unclassifiable, full insert sequence. [AK037508]
A_52_P972871	0.00488844	2.46216	down	102.854	86.4067	1.46228	0.162357	83.217	115.225	110.12	78.431	79.0611	101.728	1.07812	1.54987	1.75885	0.0715389	0.0288754	0.386657		chr3:024232266-024232218
A_52_P276529	0.0419917	1.63052	down	596.729	733.405	3.95647	3.25113	714.899	695.474	379.816	840.131	689.539	670.546	4.18091	4.14341	3.54508	3.49266	3.15347	3.10728	NM_175207	chr12:112215081-112215022	Ankrd9	Mus musculus ankyrin repeat domain 9 (Ankrd9), mRNA [NM_175207]	GO:0016787|GO:0008150|GO:0003674|GO:0005575	NM_175207	Mm.250989	74251	ENSMUST00000135131	TC1613783
A_52_P483280	0.00122751	1.70454	down	7460.32	9077.01	7.65691	6.88753	7685.02	7266.71	7429.22	8865.85	8930.68	9434.51	7.60715	7.52864	7.83492	6.89223	6.84853	6.92182	NM_010685	chrX:35772833-35772774	Lamp2	Mus musculus lysosomal-associated membrane protein 2 (Lamp2), transcript variant 2, mRNA [NM_010685]	GO:0005764|GO:0016020|GO:0005886|GO:0005624|GO:0005768|GO:0005765|GO:0031088|GO:0016021|GO:0005770|GO:0030670	NM_010685	Mm.486	16784	ENSMUST00000061755	TC1573110
A_51_P231687	0.00577274	1.82036	down	12842.3	14593.1	8.43682	7.57259	13240.9	11532.7	13753.3	15099.3	14497	14182.9	8.39203	8.195	8.72342	7.66038	7.54744	7.50995	NM_011879	chr18:36917212-36917271	Ik	Mus musculus IK cytokine (Ik), mRNA [NM_011879]	GO:0005634	NM_011879	Mm.30234	24010	ENSMUST00000007042	TC1572335
A_52_P655136	0.0839335	1.63833	down	387.901	478.306	3.35384	2.64162	273.311	415.885	474.509	471.103	491.075	472.74	2.79372	3.4016	3.86622	2.65808	2.66378	2.60299	NM_001033367	chr17:74826231-74826172	Nlrc4	Mus musculus NLR family, CARD domain containing 4 (Nlrc4), mRNA [NM_001033367]	GO:0043281|GO:0006954|GO:0042981	NM_001033367	Mm.311884	268973	ENSMUST00000052124	TC1585519
A_52_P466648	0.0103669	1.99042	down	46.7689	48.238	0.317737	-0.675336	38.3948	58.1184	43.7936	54.1496	42.1582	48.4064	-0.0378451	0.562482	0.428574	-0.462936	-0.87828	-0.684792	D00925	chr11:32811989-32811930		Mus musculus mRNA for transcription factor S-II-related proteins, complete cds. [D00925]
A_52_P662562	0.0207596	6.57477	down	554.55	131.748	3.49862	0.781674	1047.86	466.791	149.002	130.9	131.028	133.317	4.73255	3.56819	2.19511	0.81051	0.75771	0.776802		chr17:87153308-87153249
A_51_P168439	0.000581866	1.94625	down	1057.22	1127.62	4.83142	3.87073	1088.54	1163.09	920.029	961.122	1192.89	1228.86	4.7875	4.88531	4.82146	3.68676	3.94423	3.98119	AK004187	chr16:20128804-20128863	Klhl24	Mus musculus 18-day embryo whole body cDNA, RIKEN full-length enriched library, clone:1110046J11 product:unclassifiable, full insert sequence. [AK004187]	GO:0005515|GO:0008150|GO:0003674|GO:0042995|GO:0005737|GO:0005575		Mm.392450	75785		TC1599621
A_52_P538117	0.00046426	2.55989	down	104.72	84.3988	1.48965	0.133571	103.907	122.283	87.9692	93.1288	74.9795	85.088	1.39847	1.63564	1.43485	0.319342	-0.0475965	0.128967	NM_001164320	chr15:81523477-81523418	Chadl	Mus musculus chondroadherin-like (Chadl), mRNA [NM_001164320]	GO:0008150|GO:0003674|GO:0005575	NM_001164320	Mm.393287	214685	ENSMUST00000109562	TC1702360
A_51_P479390	9.23596e-05	3.64996	down	107.962	61.3926	1.54133	-0.326546	106.229	120.135	97.5214	63.3074	53.5545	67.316	1.43035	1.61007	1.58357	-0.237513	-0.533085	-0.20904	AK007436	chr6:92876407-92876348	Adamts9	Mus musculus 10 day old male pancreas cDNA, RIKEN full-length enriched library, clone:1810011L16 product:similar to ADAMTS-9 PRECURSOR (EC 3.4.24.-) (A DISINTEGRIN AND METALLOPROTEINASE WITH THROMBOSPONDIN MOTIFS 9) (ADAM-TS 9) (ADAM-TS9) [Homo sapiens], full insert sequence. [AK007436]	GO:0045636|GO:0006508|GO:0005615|GO:0048070|GO:0008237|GO:0005578|GO:0004175		Mm.158235	101401		TC1675447
A_52_P640282	0.00324563	1.89199	down	3677.61	4067.69	6.63634	5.71643	3810.71	3629.22	3592.9	3309.68	4367.42	4525.97	6.59516	6.527	6.78686	5.47066	5.81655	5.86209	NM_009121	chrX:151647594-151647564	Sat1	Mus musculus spermidine/spermine N1-acetyl transferase 1 (Sat1), mRNA [NM_009121]	GO:0042127|GO:0046208|GO:0019809|GO:0008415|GO:0008152|GO:0004145|GO:0016740|GO:0006595|GO:0005737|GO:0008080|GO:0005625	NM_009121	Mm.2734	20229	ENSMUST00000112551	TC1604172
A_52_P1101110	0.000302965	4.26742	down	113.234	55.095	1.60805	-0.485315	101.361	128.962	109.379	61.0601	46.7319	57.4929	1.36268	1.71236	1.74911	-0.289655	-0.729685	-0.436604		chr11:063896248-063896189
A_51_P315634	0.015488	1.86775	down	985.74	1086.49	4.72542	3.82411	881.284	907.146	1168.79	1019.08	1116.45	1123.94	4.48278	4.52675	5.16672	3.77123	3.84868	3.85243	NM_008682	chr10:92147811-92147752	Nedd1	Mus musculus neural precursor cell expressed, developmentally up-regulated gene 1 (Nedd1), mRNA [NM_008682]	GO:0070201|GO:0007067|GO:0051301|GO:0007049|GO:0007019|GO:0000242|GO:0031109|GO:0005932|GO:0005814|GO:0000924|GO:0000922|GO:0005737|GO:0005856|GO:0005813|GO:0045177	NM_008682	Mm.2998	17997	ENSMUST00000020163	TC1572621
A_51_P519536	0.0157524	1.52675	down	12174.9	16507.5	8.36121	7.75074	11360	12000.3	13164.6	16181.5	16536.6	16804.3	8.17099	8.25234	8.6603	7.76024	7.73736	7.75463	NM_001017959	chrX:35758368-35758309	Lamp2	Mus musculus lysosomal-associated membrane protein 2 (Lamp2), transcript variant 1, mRNA [NM_001017959]	GO:0005764|GO:0016020|GO:0005886|GO:0005624|GO:0005768|GO:0005765|GO:0031088|GO:0016021|GO:0005770|GO:0030670	NM_001017959	Mm.486	16784	ENSMUST00000016678	TC1576539
A_51_P434332	8.56493e-05	4.36473	down	237959	112971	12.6516	10.5257	234310	229004	250563	113189	112425	113300	12.5374	12.5066	12.9107	10.5666	10.5026	10.5079	NM_026716	chr7:29327157-29327216	Sycn	Mus musculus syncollin (Sycn), mRNA [NM_026716]	GO:0031410|GO:0016020|GO:0006887|GO:0030667	NM_026716	Mm.25210	68416	ENSMUST00000115981	TC1576451
A_51_P455008	0.00065089	3.29814	down	53.3455	32.8897	0.495974	-1.22568	53.8202	66.8962	39.32	36.8568	31.6336	30.1788	0.449394	0.76541	0.273118	-1.01796	-1.29263	-1.36645	NM_001029936	chr11:61931278-61931337	Cytsb	Mus musculus cytospin B (Cytsb), mRNA [NM_001029936]	GO:0005634|GO:0008150|GO:0003674	NM_001029936	Mm.458025	432572	ENSMUST00000049836	TC1598630
A_52_P556140	0.000996351	2.71631	down	5342.05	4104.21	7.1749	5.73325	5325.83	5170.13	5530.19	3996.51	4738.82	3577.28	7.07811	7.03754	7.40904	5.74271	5.93429	5.52273	NM_019806	chr2:173604740-173604799	Vapb	Mus musculus vesicle-associated membrane protein, associated protein B and C (Vapb), mRNA [NM_019806]	GO:0016020|GO:0008150|GO:0003674|GO:0005886|GO:0005624|GO:0005198|GO:0016021	NM_019806	Mm.260456	56491	ENSMUST00000067530	TC1576620
A_52_P24259	0.00270034	1.66471	down	7820.8	9764.4	7.72478	6.98951	7564.45	8110.55	7787.39	8862.08	10607.3	9823.85	7.58434	7.68714	7.90285	6.89161	7.09675	6.98016	NM_008910	chr12:73895365-73895424	Ppm1a	Mus musculus protein phosphatase 1A, magnesium dependent, alpha isoform (Ppm1a), mRNA [NM_008910]	GO:0030145|GO:0004722|GO:0016787|GO:0000287|GO:0046872|GO:0004721|GO:0008287|GO:0003824|GO:0006470	NM_008910	Mm.261045	19042		TC1574997
A_52_P5331	0.0322	1.75623	down	189.567	226.898	2.35522	1.54274	171.941	192.758	204.002	279.374	180.05	221.269	2.12508	2.29221	2.64837	1.90424	1.21624	1.50774	NR_027810	chr5:116081499-116081440	1110006O24Rik	Mus musculus RIKEN cDNA 1110006O24 gene (1110006O24Rik), non-coding RNA [NR_027810]		NR_027810	Mm.133063	66123		TC1587979
A_51_P472671	0.0141865	1.97618	down	19217	20039.4	9.00853	8.02581	16171.1	18807.5	22672.3	17800	21503.5	20814.8	8.68045	8.90057	9.44457	7.89778	8.11626	8.0634	NM_026219	chr13:67001725-67001666	Uqcrb	Mus musculus ubiquinol-cytochrome c reductase binding protein (Uqcrb), nuclear gene encoding mitochondrial protein, mRNA [NM_026219]	GO:0006122|GO:0008121|GO:0016020|GO:0008150|GO:0003674|GO:0070469|GO:0005739|GO:0022900|GO:0006810|GO:0005743	NM_026219	Mm.379136	67530	ENSMUST00000021993	TC1572565
A_51_P188211	0.000133131	2.97481	down	33875	23642.2	9.83975	8.26695	33107.2	35061.6	33456.3	24097.3	24950.6	21878.7	9.71417	9.79916	10.0059	8.33477	8.33077	8.13532	NM_008558	chr12:78038342-78038283	Max	Mus musculus Max protein (Max), transcript variant 1, mRNA [NM_008558]	GO:0005515|GO:0003700|GO:0046982|GO:0006350|GO:0030425|GO:0042803|GO:0006355|GO:0006461|GO:0045449|GO:0010629|GO:0016605|GO:0030528|GO:0005634|GO:0043565|GO:0010843|GO:0003677|GO:0005737|GO:0032403	NM_008558	Mm.268548	17187	ENSMUST00000110395	TC1584430
A_51_P446132	0.00170272	2.16489	down	996.605	960.883	4.75237	3.63808	1029.75	952.516	1007.55	814.193	1088.09	980.368	4.7074	4.59716	4.95256	3.44741	3.81156	3.65526	NM_172601	chr14:52881661-52881602	Rab2b	Mus musculus RAB2B, member RAS oncogene family (Rab2b), mRNA [NM_172601]	GO:0008150|GO:0016192|GO:0005886|GO:0007264|GO:0015031|GO:0005525|GO:0000166|GO:0006810|GO:0003674|GO:0016020|GO:0005575|GO:0005783|GO:0005794	NM_172601	Mm.32870	76338	ENSMUST00000022765	NP358502
A_51_P420415	0.00201746	2.0514	down	1365.88	1378.52	5.20445	4.16784	1427.52	1235.01	1435.1	1311.23	1445.32	1379	5.17862	4.97187	5.46287	4.13489	4.22115	4.14749	NM_175283	chr13:69712435-69712376	Srd5a1	Mus musculus steroid 5 alpha-reductase 1 (Srd5a1), mRNA [NM_175283]	GO:0005792|GO:0030154|GO:0016491|GO:0042493|GO:0006629|GO:0007548|GO:0016020|GO:0006702|GO:0008202|GO:0005737|GO:0016627|GO:0003865|GO:0016021|GO:0005783|GO:0055114	NM_175283	Mm.451912	78925	ENSMUST00000091514	TC1577202
A_52_P540478	0.000621059	1.70057	down	356.207	434.426	3.26843	2.50241	359.554	364.502	344.566	435.945	449.455	417.879	3.18938	3.21134	3.40456	2.54619	2.53601	2.42503	NM_001033341	chr18:84377566-84377507	Zfp407	Mus musculus zinc finger protein 407 (Zfp407), mRNA [NM_001033341]	GO:0008150|GO:0003674|GO:0005575	NM_001033341	Mm.329575	240476	ENSMUST00000125763	TC1597574
A_51_P104727	8.65507e-05	2.90642	down	1256.7	896.792	5.08666	3.54742	1324.32	1228.27	1217.51	935.776	845.7	908.901	5.07036	4.96397	5.22565	3.6482	3.44798	3.54606	NM_153078	chr11:21905966-21905907	Ehbp1	Mus musculus EH domain binding protein 1 (Ehbp1), mRNA [NM_153078]	GO:0005515|GO:0016020|GO:0008150|GO:0005737|GO:0005575	NM_153078	Mm.281732	216565	ENSMUST00000109563	TC1602866
A_51_P271153	0.000391786	4.56319	down	169.407	76.9576	2.18584	-0.00419855	146.055	196.612	165.553	83.8432	64.3911	82.6386	1.88969	2.32077	2.34708	0.167808	-0.267231	0.0868282	NM_147068	chr16:19486994-19487053	Olfr166	Mus musculus olfactory receptor 166 (Olfr166), mRNA [NM_147068]	GO:0004872|GO:0004984|GO:0004930|GO:0007608|GO:0007186|GO:0004871|GO:0016021|GO:0007165	NM_147068	Mm.377822	259071	ENSMUST00000074739
A_51_P375201	0.00543408	2.22529	down	871.07	806.089	4.54743	3.39344	723.249	918.53	971.431	829.377	833.094	755.796	4.19767	4.54474	4.89989	3.47407	3.42631	3.27994	NM_013807	chr4:116801376-116801317	Plk3	Mus musculus polo-like kinase 3 (Drosophila) (Plk3), mRNA [NM_013807]	GO:0004672|GO:0005515|GO:0016020|GO:0004674|GO:0005524|GO:0016740|GO:0016301|GO:0006468|GO:0030425|GO:0000166|GO:0042801	NM_013807	Mm.259022	12795	ENSMUST00000147730	NP539984
A_52_P650855	4.87162e-05	2.12989	down	23119.1	22443.6	9.28479	8.19402	22931.9	25388.5	21036.7	22781.6	22309.6	22239.5	9.18439	9.33345	9.33654	8.25377	8.16935	8.15892	NM_177390	chr11:80295776-80295717	Myo1d	Mus musculus myosin ID (Myo1d), mRNA [NM_177390]	GO:0005524|GO:0016459|GO:0005516|GO:0003779|GO:0003774|GO:0000166	NM_177390	Mm.151948	338367	ENSMUST00000041065	TC1601375
A_52_P14002	2.62849e-05	4.85887	down	354.744	151.303	3.25388	0.973258	371.348	391.611	301.273	139.165	174.5	140.243	3.23594	3.31484	3.21086	0.89884	1.17106	0.849873	AK044163	chr18:67633505-67633564	Slmo1	Mus musculus 10 days neonate cortex cDNA, RIKEN full-length enriched library, clone:A830096K14 product:hypothetical protein, full insert sequence. [AK044163]	GO:0008150|GO:0003674|GO:0005739		Mm.221420	225655		TC1593901
A_51_P394676	0.000163752	2.15564	down	4627.63	4428.92	6.9593	5.85118	5269.09	4608.88	4004.93	4507.35	4637.07	4142.34	7.06266	6.87176	6.94349	5.91625	5.90298	5.73431	BC040217	chr3:87975777-87975836		myocyte enhancer factor 2D Gene [Source:MGI Symbol;Acc:MGI:99533] [ENSMUST00000001455]			Mm.478816		ENSMUST00000104974	TC1580813
A_52_P121703	0.00174918	2.0839	down	148.192	144.679	1.97461	0.91532	151.257	182.036	111.282	153.986	139.389	140.661	1.94018	2.20964	1.774	1.04485	0.846951	0.854164	XM_001474496	chr12:4598962-4598903		PREDICTED: Mus musculus hypothetical protein LOC100045544 (LOC100045544), mRNA [XM_001474496]		XM_001474496	Mm.363890
A_52_P217875	0.066451	1.59974	down	246.292	317.964	2.71912	2.04129	208.808	229.93	300.139	264.248	333.472	356.174	2.40535	2.54661	3.20541	1.82393	2.1054	2.19452	NM_008211	chr11:115883529-115883470	H3f3b	Mus musculus H3 histone, family 3B (H3f3b), mRNA [NM_008211]	GO:0005634|GO:0003677|GO:0000786|GO:0005694|GO:0006334	NM_008211	Mm.371563	15081	ENSMUST00000106454	TC1573650
A_52_P932831	0.00200737	3.20519	down	346.413	222.097	3.21431	1.5339	308.294	313.68	417.264	209.326	227.507	229.457	2.96748	2.99471	3.68074	1.48779	1.55375	1.56017		chr7:135927993-135927934
A_52_P397280	0.00338397	1.96777	down	1404.16	1484.27	5.24612	4.26956	1407.78	1320.7	1484	1329.55	1661.96	1461.29	5.15852	5.06865	5.5112	4.15491	4.42265	4.23111	NM_010754	chr18:76464620-76464679	Smad2	Mus musculus MAD homolog 2 (Drosophila) (Smad2), mRNA [NM_010754]	GO:0051098|GO:0048340|GO:0006350|GO:0007492|GO:0048701|GO:0030324|GO:0048589|GO:0007182|GO:0045449|GO:0031016|GO:0005667|GO:0005634|GO:0006468|GO:0009880|GO:0048617|GO:0005622|GO:0008285|GO:0045165|GO:0001657|GO:0007389|GO:0060039|GO:0005515|GO:0007179|GO:0003700|GO:0001701|GO:0010718|GO:0060021|GO:0043234|GO:0045944|GO:0007507|GO:0006355|GO:0003690|GO:0035265|GO:0008134|GO:0009791|GO:0016563|GO:…	NM_010754	Mm.391091	17126	ENSMUST00000025453	TC1576658
A_51_P216595	8.24317e-06	4.38259	down	2526.31	1195	6.09371	3.96192	2641.02	2559.4	2378.51	1235.34	1214.7	1134.97	6.0662	6.02315	6.19177	4.04888	3.97037	3.86652	NM_175482	chr9:48850346-48850404	Usp28	Mus musculus ubiquitin specific peptidase 28 (Usp28), mRNA [NM_175482]	GO:0004221|GO:0016787|GO:0008150|GO:0003674|GO:0006511|GO:0008233|GO:0005575|GO:0008234	NM_175482	Mm.21630	235323	ENSMUST00000034805	NP580489
A_51_P494409	0.00410335	2.03415	down	113.405	117.1	1.61482	0.590395	110.526	123.202	106.488	90.0114	129.562	131.726	1.48755	1.64643	1.71047	0.270221	0.74148	0.759484	NM_145484	chr17:22513739-22513798	Zfp758	Mus musculus zinc finger protein 758 (Zfp758), mRNA [NM_145484]	GO:0046872|GO:0008150|GO:0003674|GO:0005575	NM_145484	Mm.390945	224598	ENSMUST00000088765	TC1777477
A_51_P467971	0.00238989	1.79543	down	2670.13	3082.42	6.17422	5.3299	2574.77	2653.4	2782.21	3057.97	3110.46	3078.84	6.02954	6.07519	6.41794	5.35654	5.32689	5.30625	NM_146005	chr10:69487274-69487333	Ank3	Mus musculus ankyrin 3, epithelial (Ank3), transcript variant 2, mRNA [NM_146005]	GO:0050808|GO:0005515|GO:0005624|GO:0005200|GO:0045202|GO:0007411|GO:0030424	NM_146005	Mm.235960	11735	ENSMUST00000092434	TC1578590
A_52_P87839	0.000228942	2.73685	down	506.62	385.705	3.77689	2.32438	514.966	506.711	498.182	333.148	410.748	413.219	3.70765	3.68658	3.93646	2.15821	2.40609	2.40885	NM_013657	chr5:17234078-17234137	Sema3c	Mus musculus sema domain, immunoglobulin domain (Ig), short basic domain, secreted, (semaphorin) 3C (Sema3c), mRNA [NM_013657]	GO:0021915|GO:0060174|GO:0007399|GO:0004872|GO:0005576|GO:0060666|GO:0003350|GO:0005615|GO:0007275|GO:0030154|GO:0003215|GO:0007507|GO:0009791|GO:0030215|GO:0016020|GO:0001974|GO:0003151|GO:0001756|GO:0001755	NM_013657	Mm.5071	20348	ENSMUST00000115271	TC1577356
A_51_P125009	5.69443e-05	3.01025	down	7078.53	4873.76	7.58064	5.99075	7424.06	6864.88	6946.65	4876.69	4958.54	4786.04	7.55731	7.44658	7.73803	6.02987	5.99968	5.9427	NM_021495	chr16:46448355-46448296	Pvrl3	Mus musculus poliovirus receptor-related 3 (Pvrl3), transcript variant alpha, mRNA [NM_021495]	GO:0005515|GO:0002089|GO:0005886|GO:0005911|GO:0042803|GO:0060042|GO:0007156|GO:0007155|GO:0016020|GO:0016337|GO:0043296|GO:0009566|GO:0016021|GO:0005913	NM_021495	Mm.328072	58998	ENSMUST00000121245	TC1579820
A_52_P319927	0.00515834	3.9594	down	119.269	63.4181	1.66959	-0.315687	92.0024	132.125	133.678	80.0206	44.1343	66.0993	1.22292	1.74732	2.03855	0.100485	-0.812193	-0.235353	AK049272	chr2:5817969-5817910	Dhtkd1	dehydrogenase E1 and transketolase domain containing 1 Gene [Source:MGI Symbol;Acc:MGI:2445096] [ENSMUST00000095147]	GO:0004591|GO:0008150|GO:0003674|GO:0016624|GO:0008152|GO:0006096|GO:0005739|GO:0016491|GO:0030976|GO:0005575|GO:0055114		Mm.222517	209692	ENSMUST00000095147	TC1597295
A_52_P59931	0.000624198	1.66335	down	914.436	1139.85	4.62875	3.89466	928.391	924.388	890.528	1135.85	1153.78	1129.93	4.55791	4.55391	4.77444	3.92774	3.89613	3.8601	NM_009547	chr17:69739169-69739228	Zfp161	Mus musculus zinc finger protein 161 (Zfp161), mRNA [NM_009547]	GO:0003676|GO:0005634|GO:0005515|GO:0046872|GO:0006350|GO:0003677|GO:0008270|GO:0045449|GO:0005622	NM_009547	Mm.29434	22666	ENSMUST00000112676	TC1576184
A_52_P1020019	0.0549522	1.75417	down	58.5278	68.5626	0.63844	-0.17235	49.9298	51.2395	74.4139	62.1666	62.2423	81.2789	0.341148	0.380744	1.19343	-0.263746	-0.316196	0.062892	AK047343	chr2:34284365-34284424		Mus musculus 10 days neonate cerebellum cDNA, RIKEN full-length enriched library, clone:B930051H17 product:unclassifiable, full insert sequence. [AK047343]						TC1606943
A_52_P230628	0.00198397	1.92644	down	1747.02	1879.65	5.56173	4.6158	1748.27	1658.78	1834	1849.99	1837.27	1951.68	5.47103	5.39747	5.81671	4.63149	4.56733	4.64858	NM_026836	chr17:28038331-28038272	Taf11	Mus musculus TAF11 RNA polymerase II, TATA box binding protein (TBP)-associated factor (Taf11), mRNA [NM_026836]	GO:0005634|GO:0005515|GO:0003702|GO:0008150|GO:0006350|GO:0003677|GO:0006367|GO:0005669|GO:0045449	NM_026836	Mm.267998	68776	ENSMUST00000025057	TC1576408
A_52_P680538	0.000208009	2.61565	down	43.8462	34.7362	0.245426	-1.14174	41.4879	45.8393	44.2113	34.0105	35.391	34.8071	0.0739379	0.220071	0.44227	-1.13391	-1.13071	-1.16061	AK041853	chr5:139623681-139623622		Mus musculus 3 days neonate thymus cDNA, RIKEN full-length enriched library, clone:A630042D18 product:unclassifiable, full insert sequence. [AK041853]			Mm.453017			TC1617230
A_51_P160344	0.000357639	2.2406	down	14657.7	13568.1	8.6316	7.46772	14529.6	14673.4	14770	13810.5	13184.7	13709.1	8.52603	8.54247	8.82631	7.53167	7.41055	7.46093	NM_028448	chr11:62338546-62338487	Cenpv	Mus musculus centromere protein V (Cenpv), mRNA [NM_028448]	GO:0032467|GO:0034508|GO:0007067|GO:0051301|GO:0007049|GO:0033044|GO:0005634|GO:0003674|GO:0008152|GO:0016846|GO:0031508|GO:0051233|GO:0005737|GO:0005856|GO:0000776	NM_028448	Mm.390409	73139	ENSMUST00000018653	TC1595404
A_51_P190886	0.0015504	1.85332	down	5566.79	6156.37	7.21336	6.32325	5988.83	6423.66	4287.87	5699.81	6858.63	5910.66	7.24738	7.35074	7.04197	6.25488	6.46768	6.24719	NM_026718	chr5:115255540-115255599	Ankrd13a	Mus musculus ankyrin repeat domain 13a (Ankrd13a), mRNA [NM_026718]	GO:0008150|GO:0003674|GO:0005575	NM_026718	Mm.275554	68420	ENSMUST00000102578	TC1585395
A_51_P482043	0.000451622	1.99666	down	1461.82	1521.62	5.30564	4.30805	1461.55	1490.14	1433.78	1377.33	1612.11	1575.42	5.2126	5.24279	5.46153	4.20585	4.37871	4.3396	NM_175266	chr9:111181144-111181203	Epm2aip1	Mus musculus EPM2A (laforin) interacting protein 1 (Epm2aip1), mRNA [NM_175266]	GO:0008150|GO:0003674|GO:0005575|GO:0005783	NM_175266	Mm.209005	77781	ENSMUST00000135807	TC1575101
A_51_P297865	4.36183e-05	1.90577	down	684.419	739.065	4.19942	3.26905	727.945	758.435	566.877	719.702	768.738	728.755	4.207	4.26844	4.12282	3.26944	3.31033	3.22737	NM_027782	chr14:9055402-9055461	Kctd6	Mus musculus potassium channel tetramerisation domain containing 6 (Kctd6), mRNA [NM_027782]	GO:0005515|GO:0005249|GO:0016020|GO:0005216|GO:0008076|GO:0006813	NM_027782	Mm.292712	71393	ENSMUST00000022272	TC1578706
A_52_P257919	0.00225942	1.78839	down	59.1453	68.6806	0.674171	-0.16449	58.7296	64.9332	53.773	75.2066	60.0578	70.7772	0.575333	0.722442	0.724738	0.0109739	-0.36774	-0.136703	NM_001164663	chr2:156841665-156841606	9830001H06Rik	Mus musculus RIKEN cDNA 9830001H06 gene (9830001H06Rik), mRNA [NM_001164663]	GO:0008150|GO:0003674|GO:0005575	NM_001164663	Mm.79466	320706	ENSMUST00000069098	TC1598776
A_52_P126070	0.0174306	2.42709	down	37.7737	31.4214	-0.00852013	-1.28774	28.6253	34.5304	50.1655	29.4148	32.4533	32.3962	-0.461465	-0.188645	0.62455	-1.34335	-1.25573	-1.26416	NM_001109747	chr10:29916816-29916757	2610036L11Rik	Mus musculus RIKEN cDNA 2610036L11 gene (2610036L11Rik), mRNA [NM_001109747]	GO:0005634|GO:0008150|GO:0003674|GO:0000775|GO:0003677|GO:0005694|GO:0005575	NM_001109747	Mm.251779	66311		TC1613955
A_51_P112627	0.00481268	1.71227	down	6228.52	7412.43	7.36944	6.59353	7314.16	6747.32	4624.07	7989.11	7251.07	6997.1	7.53579	7.42166	7.15087	6.74201	6.54796	6.49063	NM_009180	chr11:116538094-116538040	St6galnac2	Mus musculus ST6 (alpha-N-acetyl-neuraminyl-2,3-beta-galactosyl-1,3)-N-acetylgalactosaminide alpha-2,6-sialyltransferase 2 (St6galnac2), mRNA [NM_009180]	GO:0016757|GO:0030173|GO:0016020|GO:0006486|GO:0016740|GO:0008373|GO:0016021|GO:0005794	NM_009180	Mm.3947	20446	ENSMUST00000079545	TC1578286
A_51_P253019	0.0262106	1.78306	down	1048.82	1209.45	4.81154	3.97718	991.772	893.576	1261.13	1121.91	1313	1193.44	4.65318	4.505	5.27642	3.90992	4.08263	3.939	AK171523	chr14:60842946-60842887	BC010981	Mus musculus B6-derived CD11 +ve dendritic cells cDNA, RIKEN full-length enriched library, clone:F730225N24 product:hypothetical protein, full insert sequence. [AK171523]	GO:0008150|GO:0003674|GO:0005575		Mm.440433	407830		TC1659387
A_52_P194481	0.000117036	4.10999	down	96.4581	48.1337	1.36351	-0.675622	93.9064	117.62	77.8485	48.1684	43.3805	52.8523	1.25247	1.57954	1.25852	-0.631798	-0.837047	-0.558022	NM_177767	chr8:96579188-96579438	Ogfod1	Mus musculus 2-oxoglutarate and iron-dependent oxygenase domain containing 1 (Ogfod1), transcript variant 1, mRNA [NM_177767]	GO:0016706|GO:0005506|GO:0046872|GO:0008150|GO:0003674|GO:0031418|GO:0016705|GO:0016702|GO:0016491|GO:0005575|GO:0055114	NM_177767	Mm.251085	270086	ENSMUST00000109556	TC1602087
A_52_P81324	0.00300409	1.6387	down	27.9957	35.447	-0.405914	-1.11847	28.0403	30.906	25.0408	36.9676	30.992	38.3813	-0.491251	-0.348629	-0.377862	-1.01363	-1.3222	-1.01958	XM_001001884	chr7:125740248-125740307	B230311B06Rik	PREDICTED: Mus musculus RIKEN cDNA B230311B06 gene (B230311B06Rik), mRNA [XM_001001884]	GO:0008150|GO:0003674|GO:0005575	XM_001001884	Mm.291232	381914		TC1635994
A_51_P179436	0.0326279	1.84946	down	35.4837	38.9476	-0.0934003	-0.980503	25.6872	43.9429	36.8211	41.1401	34.9032	40.7996	-0.617705	0.159116	0.178388	-0.859343	-1.15073	-0.931433	AK081173	chr19:8821180-8821239	B930096F20Rik	Mus musculus 10 days neonate cerebellum cDNA, RIKEN full-length enriched library, clone:B930096F20 product:unclassifiable, full insert sequence. [AK081173]	GO:0008150|GO:0003674|GO:0005575		Mm.445038	319332
A_51_P498340	0.000120814	2.11844	down	202.927	198.135	2.4518	1.36879	221.686	206.896	180.199	210.466	196.486	187.454	2.49169	2.39432	2.46937	1.49563	1.34226	1.26848	NM_145487	chr17:36109484-36109474	Prr3	Mus musculus proline-rich polypeptide 3 (Prr3), transcript variant 1, mRNA [NM_145487]	GO:0003676|GO:0046872|GO:0008150|GO:0003674|GO:0008270|GO:0005575	NM_145487	Mm.40036	75210	ENSMUST00000055454	TC1577901
A_51_P480578	3.38379e-05	2.37554	down	15075.6	13135.8	8.6687	7.42044	16321.1	15141.9	13763.9	13266.3	13610.9	12530.2	8.69376	8.58782	8.72452	7.47367	7.45646	7.33121	NM_008797	chr19:4621637-4621696	Pcx	Mus musculus pyruvate carboxylase (Pcx), nuclear gene encoding mitochondrial protein, transcript variant 2, mRNA [NM_008797]	GO:0008610|GO:0009374|GO:0005524|GO:0006094|GO:0005739|GO:0004736|GO:0000166|GO:0003824|GO:0005743|GO:0006107|GO:0046872|GO:0031406|GO:0006090|GO:0008152|GO:0005737|GO:0005625|GO:0016874	NM_008797	Mm.1845	18563	ENSMUST00000113825
A_51_P512541	5.95349e-06	2.12207	down	4729.82	4607.02	6.99502	5.90955	5160.04	4799.3	4230.12	4524.24	4689.14	4607.68	7.03248	6.93017	7.02241	5.92165	5.91909	5.88791	NM_001082975	chr14:56516215-56516156	Sdr39u1	Mus musculus short chain dehydrogenase/reductase family 39U, member 1 (Sdr39u1), mRNA [NM_001082975]	GO:0044237|GO:0008150|GO:0003674|GO:0050662|GO:0008152|GO:0005488|GO:0005575|GO:0003824	NM_001082975	Mm.387102	654795	ENSMUST00000111325	TC1637792
A_51_P326434	0.000152809	2.9586	down	10340.2	7246.49	8.12789	6.56298	10039.1	10397.9	10583.6	7202.07	7401.52	7135.89	7.99265	8.04556	8.34546	6.59238	6.57759	6.51896	NM_025827	chr8:89240294-89240353	Lonp2	Mus musculus lon peptidase 2, peroxisomal (Lonp2), transcript variant 1, mRNA [NM_025827]	GO:0005777|GO:0004252|GO:0005515|GO:0008150|GO:0008236|GO:0005782|GO:0004176|GO:0005524|GO:0008233|GO:0000166|GO:0006508|GO:0005634|GO:0016787|GO:0017111|GO:0005737|GO:0007031	NM_025827	Mm.324550	66887	ENSMUST00000034141	TC1572127
A_52_P104581	0.000732217	1.73966	down	3680.3	4361.84	6.62712	5.82832	4004.32	3971.05	3065.52	4697.43	4315.67	4072.43	6.66666	6.65686	6.55784	5.97584	5.79935	5.70976	NM_029741	chr7:52594801-52594742	Ppfia3	Mus musculus protein tyrosine phosphatase, receptor type, f polypeptide (PTPRF), interacting protein (liprin), alpha 3 (Ppfia3), mRNA [NM_029741]	GO:0005737	NM_029741	Mm.277235	76787	ENSMUST00000094439	TC1581164
A_52_P32437	0.0137132	2.44685	down	203.517	175.804	2.44028	1.14936	250.934	192.975	166.643	214.447	116.705	196.26	2.67048	2.29383	2.35654	1.52266	0.590702	1.33471	BC051212	chr3:130814550-130814491		Mus musculus, clone IMAGE:1329925, mRNA. [BC051212]			Mm.436697			TC1599012
A_51_P194883	0.000125523	2.48832	down	6939.65	5744.17	7.54086	6.22569	7789.44	7288.75	5740.75	6204.45	5545.42	5482.64	7.62662	7.53301	7.46295	6.37727	6.16106	6.13874	NM_008434	chr7:150612740-150612799	Kcnq1	Mus musculus potassium voltage-gated channel, subfamily Q, member 1 (Kcnq1), mRNA [NM_008434]	GO:0005244|GO:0005249|GO:0042383|GO:0005886|GO:0055085|GO:0042391|GO:0005216|GO:0005267|GO:0042221|GO:0006810|GO:0031410|GO:0005887|GO:0015271|GO:0046676|GO:0016020|GO:0006349|GO:0006811|GO:0016458|GO:0016021|GO:0006813|GO:0008076	NM_008434	Mm.439769	16535	ENSMUST00000009689	TC1584003
A_51_P276715	0.000555578	2.36187	down	79.6928	69.655	1.10128	-0.138649	71.9203	91.0028	76.1552	69.225	72.8482	66.892	0.867644	1.2094	1.2268	-0.108594	-0.0892	-0.218154	NM_146389	chr7:6523331-6523390	Olfr1350	Mus musculus olfactory receptor 1350 (Olfr1350), mRNA [NM_146389]	GO:0004872|GO:0004984|GO:0004930|GO:0007608|GO:0007186|GO:0004871|GO:0016021|GO:0007165	NM_146389	Mm.271316	258384	ENSMUST00000070985	TC1600255
A_52_P158527	0.00472361	1.64463	down	2197.09	2722.13	5.86784	5.15007	2221.26	2684.07	1685.96	2825.78	2683.6	2657	5.81648	6.09176	5.69528	5.24262	5.11394	5.09367	NM_207680	chr2:127988051-127988110	Bcl2l11	Mus musculus BCL2-like 11 (apoptosis facilitator) (Bcl2l11), transcript variant 1, mRNA [NM_207680]	GO:0000300|GO:0046982|GO:0046620|GO:0002262|GO:0043583|GO:0006917|GO:0043231|GO:0007283|GO:0007160|GO:0001776|GO:0016020|GO:0008584|GO:0048070|GO:0048538|GO:0005515|GO:0001782|GO:0001701|GO:0005739|GO:0042981|GO:0048563|GO:0043029|GO:0048536|GO:0001783|GO:0001822|GO:0043065|GO:0002260|GO:0008017|GO:0009791|GO:0048066|GO:0042475|GO:0035148|GO:0005737|GO:0006915|GO:0030879	NM_207680	Mm.141083	12125	ENSMUST00000110341	TC1650552
A_51_P227770	5.08809e-05	1.82945	down	1094.76	1237.34	4.88379	4.01237	1205.67	1093.02	985.579	1184.24	1278.31	1249.48	4.93494	4.79566	4.92075	3.98793	4.044	4.00519	NM_028398	chr11:51414123-51416354	Agxt2l2	Mus musculus alanine-glyoxylate aminotransferase 2-like 2 (Agxt2l2), mRNA [NM_028398]	GO:0008150|GO:0003674|GO:0016740|GO:0008483|GO:0005739|GO:0003824|GO:0030170	NM_028398	Mm.478867	72947	ENSMUST00000101250	TC1581657
A_52_P645862	0.00910537	2.12093	down	287.978	274.385	2.91998	1.83529	390.401	240.19	233.342	306.679	260.249	256.226	3.30813	2.60959	2.84223	2.03877	1.74773	1.71936	NM_177322	chr13:30474638-30474697	Agtr1a	Mus musculus angiotensin II receptor, type 1a (Agtr1a), mRNA [NM_177322]	GO:0002019|GO:0004930|GO:0043524|GO:0005886|GO:0001596|GO:0004945|GO:0002018|GO:0031968|GO:0030425|GO:0006885|GO:0007204|GO:0043621|GO:0002001|GO:0045777|GO:0031983|GO:0016020|GO:0001568|GO:0042756|GO:0002035|GO:0012505|GO:0017046|GO:0016021|GO:0016323|GO:0004872|GO:0005515|GO:0001965|GO:0007186|GO:0005768|GO:0001991|GO:0007165|GO:0007200|GO:0001822|GO:0043627|GO:0012506|GO:0005737|GO:0004871	NM_177322	Mm.35062	11607	ENSMUST00000066412	TC1580256
A_52_P545010	2.30668e-07	2.60497	down	5938.79	4714.46	7.32362	5.94236	6184.48	6344.45	5287.43	4532.66	4751.18	4859.55	7.29375	7.33284	7.34428	5.92433	5.93805	5.96469	NM_027216	chr11:113106296-113106237	Slc39a11	Mus musculus solute carrier family 39 (metal ion transporter), member 11 (Slc39a11), transcript variant 2, mRNA [NM_027216]	GO:0030001|GO:0016020|GO:0008150|GO:0003674|GO:0055085|GO:0006811|GO:0046873|GO:0016021|GO:0005575|GO:0006829|GO:0006810	NM_027216	Mm.341021	69806	ENSMUST00000042657	TC1595325
A_51_P327418	0.00271957	2.10535	down	4044.41	3977.72	6.77064	5.69658	3826.86	3867.86	4438.52	3767.99	3998.49	4166.67	6.60126	6.61888	7.09179	5.65776	5.68922	5.74276	NM_025438	chr5:124179241-124179182	Rsrc2	Mus musculus arginine/serine-rich coiled-coil 2 (Rsrc2), transcript variant 2, mRNA [NM_025438]	GO:0008150|GO:0003674|GO:0005575	NM_025438	Mm.477997	208606	ENSMUST00000057795	TC1644390
A_51_P417458	0.000595862	2.1134	down	2917.91	2864.49	6.30209	5.22252	3029.13	2782.21	2942.38	2694.66	3026.7	2872.12	6.264	6.14357	6.49869	5.17408	5.28751	5.20598	NM_023434	chr14:52914062-52914121	Tox4	Mus musculus TOX high mobility grodown box family member 4 (Tox4), mRNA [NM_023434]	GO:0005634|GO:0008150|GO:0003674|GO:0003677|GO:0005575	NM_023434	Mm.246237	268741	ENSMUST00000071842	TC1572659
A_51_P182456	0.0143631	1.9988	down	516.576	550.716	3.80498	2.80585	515.782	525.296	508.649	381.628	653.093	617.428	3.70994	3.73854	3.96645	2.35421	3.07512	2.98821	AK009638	chr5:108932789-108932848	Pcgf3	polycomb grodown ring finger 3 Gene [Source:MGI Symbol;Acc:MGI:1916837] [ENSMUST00000046975]	GO:0005515|GO:0046872|GO:0008150|GO:0006350|GO:0003674|GO:0008270|GO:0005575|GO:0045449		Mm.261218	69587	ENSMUST00000046975	TC1689969
A_51_P218216	0.000181733	2.08975	down	1144.05	1135.85	4.95182	3.88849	1179.6	1135.66	1116.87	1073.38	1177.49	1156.68	4.9034	4.85088	5.10118	3.84613	3.92548	3.89386	NM_153164	chr8:98243673-98243614	Cnot1	Mus musculus CCR4-NOT transcription complex, subunit 1 (Cnot1), transcript variant 1, mRNA [NM_153164]	GO:0005515|GO:0008150|GO:0006350|GO:0005575|GO:0045449	NM_153164	Mm.259220	234594		TC1590292
A_51_P489966	5.1006e-06	2.09647	down	7672.18	7570.38	7.69308	6.62512	8292.67	7870.98	6852.9	7154.09	7755.59	7801.47	7.71694	7.64389	7.71842	6.58274	6.645	6.64761	NM_009321	chr13:95612744-95612803	Tbca	Mus musculus tubulin cofactor A (Tbca), mRNA [NM_009321]	GO:0051082|GO:0007021|GO:0005874|GO:0005856|GO:0005737	NM_009321	Mm.379025	21371	ENSMUST00000046644	TC1575040
A_51_P110301	0.0760506	1.67129	down	10236.6	11839.9	8.01216	7.2712	14340.5	10720.2	5649.19	11735.4	12147.1	11637.1	8.50712	8.0896	7.43976	7.29677	7.29231	7.22453	NM_009778	chr17:57343475-57343416	C3	Mus musculus complement component 3 (C3), mRNA [NM_009778]	GO:0007596|GO:0005515|GO:0005576|GO:0050766|GO:0006954|GO:0005615|GO:0001970|GO:0006956|GO:0001798|GO:0006958|GO:0045766|GO:0004866|GO:0006957|GO:0048037|GO:0045087	NM_009778	Mm.19131	12266	ENSMUST00000024988	TC1573451
A_51_P296416	0.0308125	1.72809	down	2097.22	2489.61	5.81087	5.02169	1858.75	1886.3	2546.6	2510.86	2508.17	2449.8	5.55943	5.5829	6.29028	5.07215	5.0164	4.97653	NM_019716	chr8:87831769-87831828	Orc6l	Mus musculus origin recognition complex, subunit 6-like (S. cerevisiae) (Orc6l), transcript variant 1, mRNA [NM_019716]	GO:0005634|GO:0008150|GO:0003674|GO:0003677|GO:0005664|GO:0006260|GO:0005575	NM_019716	Mm.29709	56452	ENSMUST00000034132	TC1577527
A_51_P446045	0.0920924	2.18711	down	53.8112	51.7217	0.48428	-0.644744	34.2325	60.6107	66.5904	66.4514	30.3791	58.3347	-0.203389	0.62306	1.03317	-0.167587	-1.35101	-0.415633	NM_024450	chr19:44316703-44316762	Scd3	Mus musculus stearoyl-coenzyme A desaturase 3 (Scd3), mRNA [NM_024450]	GO:0008610|GO:0006633|GO:0016491|GO:0016021|GO:0055114	NM_024450	Mm.479161	30049	ENSMUST00000026220	TC1584906
A_52_P521507	0.000564079	2.32793	down	2676.44	2383.36	6.17777	4.95872	2675.81	2582.31	2771.22	2412.82	2400.03	2337.23	6.08507	6.036	6.41223	5.01469	4.95281	4.90867	NM_001081302	chr15:27660735-27660676	Trio	Mus musculus triple functional domain (PTPRF interacting) (Trio), mRNA [NM_001081302]	GO:0004672|GO:0008150|GO:0005524|GO:0016740|GO:0000166|GO:0003674|GO:0004674|GO:0005089|GO:0006468|GO:0016301|GO:0005085|GO:0005737|GO:0035023|GO:0005575|GO:0005622	NM_001081302	Mm.211229	223435		TC1600416
A_51_P390314	0.0549585	1.57944	down	2044.69	2657.65	5.77444	5.11503	1803.66	1850.7	2479.72	2794.28	2616.18	2562.5	5.51603	5.55541	6.25189	5.22645	5.07723	5.04142	NM_001111279	chr1:79702041-79701982	Wdfy1	Mus musculus WD repeat and FYVE domain containing 1 (Wdfy1), transcript variant 1, mRNA [NM_001111279]	GO:0046872	NM_001111279	Mm.293273	69368	ENSMUST00000097685	TC1578756
A_52_P660032	0.00124781	1.74819	down	215.548	256.631	2.54223	1.73637	228.988	215.719	201.937	222.636	263.852	283.406	2.53844	2.45457	2.63369	1.57673	1.76756	1.86481	NM_016856	chr12:103243651-103243710	Cpsf2	Mus musculus cleavage and polyadenylation specific factor 2 (Cpsf2), mRNA [NM_016856]	GO:0005634|GO:0016787|GO:0008150|GO:0003674|GO:0003723|GO:0006397|GO:0005575	NM_016856	Mm.716	51786	ENSMUST00000047357	TC1574207
A_52_P72572	4.94841e-05	5.33106	down	214.708	82.647	2.51705	0.102626	257.618	217.786	168.72	74.8224	93.3863	79.7323	2.70841	2.46832	2.37441	0.00358343	0.269119	0.0351768	AK006389	chr16:49239021-49238962		RIKEN cDNA 1700026J12 gene Gene [Source:MGI Symbol;Acc:MGI:1920505] [ENSMUST00000098226]			Mm.307720		ENSMUST00000098226	TC1590263
A_51_P268748	2.09689e-05	4.6075	down	397.828	178.042	3.41703	1.21305	401.709	455.96	335.814	183.983	161.936	188.208	3.34932	3.53432	3.36745	1.30161	1.06326	1.27426	NR_015483	chr9:41400105-41400164	2610203C20Rik	Mus musculus RIKEN cDNA 2610203C20 gene (2610203C20Rik), non-coding RNA [NR_015483]	GO:0008150|GO:0003674|GO:0005575	NR_015483	Mm.38166	100042464		TC1621306
A_51_P516808	0.000578011	1.99723	down	3456.72	3590.45	6.54743	5.54943	3450.15	3432.82	3487.2	3499.91	3534.29	3737.14	6.45176	6.44674	6.74378	5.55129	5.51118	5.5858	NM_080557	chr16:33299415-33299474	Snx4	Mus musculus sorting nexin 4 (Snx4), mRNA [NM_080557]	GO:0005515|GO:0015031|GO:0035091|GO:0007154|GO:0006810	NM_080557	Mm.28196	69150	ENSMUST00000023502	TC1574700
A_51_P313503	0.00112574	2.35147	down	55.8623	49.0066	0.587617	-0.645945	48.9522	63.734	54.9007	50.4517	50.0187	46.5494	0.312621	0.69555	0.75468	-0.564984	-0.631626	-0.741226	NM_147109	chr7:110122411-110122352	Olfr577	Mus musculus olfactory receptor 577 (Olfr577), mRNA [NM_147109]	GO:0004872|GO:0004984|GO:0004930|GO:0007608|GO:0007186|GO:0004871|GO:0016021|GO:0007165	NM_147109	Mm.377854	259113	ENSMUST00000051505	TC1599970
A_51_P513720	5.10125e-06	1.97608	down	1275.02	1331.08	5.10074	4.1181	1387.76	1343.57	1093.72	1316.32	1304.34	1372.56	5.13786	5.09341	5.07096	4.14048	4.07308	4.14074	U19596	chr4:109333818-109333757	Cdkn2c	Mus musculus Cdk4 and Cdk6 inhibitor p18 protein mRNA, complete cds. [U19596]	GO:0007049|GO:0008285		Mm.1912	12580		TC1596499
A_52_P552194	0.000504971	1.61529	down	556.079	714.672	3.90892	3.21713	574.738	582.771	510.728	644.764	725.047	774.204	3.86608	3.88834	3.97234	3.11081	3.22591	3.31465	NM_133990	chrX:33710154-33710213	Il13ra1	Mus musculus interleukin 13 receptor, alpha 1 (Il13ra1), mRNA [NM_133990]	GO:0004896|GO:0004872|GO:0016515|GO:0016020|GO:0030890|GO:0002639|GO:0016021	NM_133990	Mm.24208	16164	ENSMUST00000033418	TC1577689
A_52_P370935	0.00691718	1.75749	down	1127.59	1325.58	4.92553	4.11202	988.432	1200.44	1193.9	1282.08	1364.82	1329.84	4.64832	4.9309	5.19739	4.10246	4.13847	4.09512	NM_133236	chr6:8543357-8543416	Glcci1	Mus musculus glucocorticoid induced transcript 1 (Glcci1), transcript variant 1, mRNA [NM_133236]	GO:0005515|GO:0005737	NM_133236	Mm.210787	170772	ENSMUST00000050350	TC1591510
A_51_P311319	0.0196671	2.58697	down	155.693	127.608	2.05564	0.684378	126.582	151.926	188.572	83.3443	146.286	153.195	1.68324	1.94878	2.5349	0.159198	0.916623	0.977313	NM_029022	chr2:73175492-73175551	Scrn3	Mus musculus secernin 3 (Scrn3), mRNA [NM_029022]	GO:0008150|GO:0003674|GO:0005575	NM_029022	Mm.247457	74616	ENSMUST00000090811	TC1618476
A_52_P339543	0.000315244	1.97702	down	1135.78	1194.24	4.94096	3.95763	1153.79	1169.25	1084.29	1065.99	1258.52	1258.2	4.87148	4.89293	5.05846	3.83616	4.02149	4.01523	NM_020558	chr11:17163634-17163968	C1d	Mus musculus C1D nuclear receptor co-repressor (C1d), mRNA [NM_020558]	GO:0005515|GO:0006350|GO:0000178|GO:0003723|GO:0045449|GO:0005634|GO:0003677|GO:0016481|GO:0017053|GO:0005737|GO:0016922|GO:0006915|GO:0003714|GO:0006364	NM_020558	Mm.287982	57316	ENSMUST00000156784	TC1725239
A_51_P111796	0.0106352	2.0819	down	153.318	155.199	2.05017	0.992267	146.943	146.807	166.205	118.174	187.639	159.783	1.89843	1.89934	2.35274	0.662949	1.27579	1.03806	AK038369	chr6:81909039-81909098	AW146020	GC-rich sequence DNA-binding factor (GCF)(Transcription factor 9)(TCF-9) [Source:UniProtKB/Swiss-Prot;Acc:Q8BKT3] [ENSMUST00000043195]	GO:0005634|GO:0003700|GO:0008150|GO:0006350|GO:0003674|GO:0003677|GO:0005575|GO:0045449		Mm.474487	330361	ENSMUST00000043195	TC1604344
A_51_P125117	0.000156184	1.59317	down	732.566	952.921	4.30589	3.63399	778.859	752.593	666.246	877.828	992.538	988.397	4.30454	4.25728	4.35584	3.55598	3.67896	3.66703	NM_025390	chr7:39048165-39048106	Pop4	Mus musculus processing of precursor 4, ribonuclease P/MRP family, (S. cerevisiae) (Pop4), mRNA [NM_025390]	GO:0008150|GO:0006379|GO:0003723|GO:0030677|GO:0004526|GO:0004540|GO:0005634|GO:0016787|GO:0003674|GO:0008033|GO:0005655|GO:0000172|GO:0005575|GO:0006364	NM_025390	Mm.22284	66161	ENSMUST00000032585	TC1575831
A_51_P481238	2.21499e-05	2.6875	down	7820.97	5980.38	7.71206	6.28579	8740.54	8337.12	6385.25	6068.23	6067.35	5805.57	7.79282	7.72689	7.61645	6.34525	6.29083	6.22131	NM_027293	chr16:93810690-93810749	Dopey2	Mus musculus dopey family member 2 (Dopey2), transcript variant 1, mRNA [NM_027293]	GO:0008150|GO:0003674|GO:0015031|GO:0005575|GO:0006810	NM_027293	Mm.23230	70028	ENSMUST00000045004	TC1576906
A_51_P426373	0.072708	2.75665	down	94.7822	76.3427	1.31015	-0.152766	62.9124	105.597	115.837	91.3387	34.8852	102.804	0.674591	1.42398	1.83188	0.29134	-1.15148	0.401838	NM_028483	chr5:30788047-30787988	Cib4	Mus musculus calcium and integrin binding family member 4 (Cib4), mRNA [NM_028483]	GO:0008150|GO:0003674|GO:0005575|GO:0005509	NM_028483	Mm.443299	73259	ENSMUST00000065486	TC1593248
A_51_P159673	0.00128804	2.72146	down	13195.9	10041.9	8.47537	7.03099	12654	12229.6	14704	9223.18	10739.5	10163	8.32663	8.27964	8.81985	6.94923	7.11462	7.02912	NM_019727	chr9:65936047-65935988	Snx1	Mus musculus sorting nexin 1 (Snx1), mRNA [NM_019727]	GO:0008565|GO:0006886|GO:0005769|GO:0005515|GO:0016020|GO:0015031|GO:0005768|GO:0035091|GO:0007154|GO:0006810|GO:0008333|GO:0005794	NM_019727	Mm.271891	56440	ENSMUST00000034946	TC1573360
A_52_P708886	0.0210805	3.17922	down	618.66	438.152	4.05108	2.3824	681.557	673.821	500.601	208.725	549.212	556.519	4.11201	4.09778	3.94344	1.48364	2.8252	2.83837	BB755555	chr16:046153394-046153335		BB755555 RIKEN full-length enriched, melanocyte Mus musculus cDNA clone G270062I20 3', mRNA sequence [BB755555]			Mm.350950
A_51_P491835	9.65495e-05	2.42072	down	736.717	631.123	4.31684	3.0414	749.985	747.711	712.454	653.7	621.417	618.252	4.25004	4.24789	4.45258	3.13067	3.0034	2.99013	AK013507	chr12:73900728-73900787	2900009J20Rik	Mus musculus adult male hippocampus cDNA, RIKEN full-length enriched library, clone:2900009J20 product:inferred: RIKEN cDNA 2900009J20 gene, full insert sequence. [AK013507]	GO:0008150|GO:0003674|GO:0005575		Mm.393972	72876
A_52_P453721	0.00131315	2.58718	down	72.414	57.6183	0.948923	-0.422457	70.6745	88.5482	58.0192	59.1809	48.3936	65.2803	0.842436	1.16995	0.834386	-0.334754	-0.679277	-0.253339	AK020598	chr11:85580550-85580491	9530048J24Rik	Mus musculus adult male urinary bladder cDNA, RIKEN full-length enriched library, clone:9530048J24 product:unclassifiable, full insert sequence. [AK020598]	GO:0008150|GO:0003674|GO:0005575		Mm.446143	78420		TC1621465
A_51_P273405	0.00232542	1.91496	down	20723.2	22429	9.13003	8.19272	20660.5	19723.5	21785.7	23005.1	21689	22592.8	9.03391	8.96918	9.38702	8.26785	8.12866	8.18166	NM_175836	chr11:29999546-29999487	Spnb2	Mus musculus spectrin beta 2 (Spnb2), transcript variant 1, mRNA [NM_175836]	GO:0005515|GO:0005886|GO:0032437|GO:0005516|GO:0030863|GO:0043234|GO:0007182|GO:0008091|GO:0005634|GO:0016020|GO:0051693|GO:0005200|GO:0005737|GO:0005856|GO:0003779|GO:0007184|GO:0032403	NM_175836	Mm.123110	20742	ENSMUST00000011877	NP968298
A_52_P608916	0.00638167	2.63907	down	52.7899	41.4714	0.498927	-0.901104	42.2874	58.6973	57.3849	50.2219	37.5397	36.6528	0.101473	0.576781	0.818526	-0.57157	-1.04568	-1.08607	NM_177084	chr1:40659905-40663902	Slc9a4	Mus musculus solute carrier family 9 (sodium/hydrogen exchanger), member 4 (Slc9a4), mRNA [NM_177084]	GO:0015297|GO:0015299|GO:0016020|GO:0015385|GO:0006814|GO:0005886|GO:0055085|GO:0006811|GO:0006812|GO:0006885|GO:0016021|GO:0006810	NM_177084	Mm.108602	110895	ENSMUST00000027233	TC1587067
A_52_P264229	0.000614701	1.57035	down	437.121	571.544	3.54976	2.89867	450.497	503.515	357.351	561.383	580.31	572.938	3.51469	3.67745	3.45712	2.91103	2.90466	2.88032	NM_025454	chr1:95718343-95718402	Ing5	Mus musculus inhibitor of growth family, member 5 (Ing5), mRNA [NM_025454]	GO:0005634|GO:0005515|GO:0046872|GO:0008150|GO:0006350|GO:0003674|GO:0016568|GO:0008270|GO:0005575|GO:0045449	NM_025454	Mm.64065	66262	ENSMUST00000027505
A_51_P117777	0.00097705	1.57952	down	4465.72	5857.72	6.91551	6.25603	4745.62	4366.42	4285.13	5885.3	5735.31	5952.54	6.9117	6.79379	7.04105	6.30109	6.20964	6.25737	NM_016658	chr4:41705471-41705530	Galt	Mus musculus galactose-1-phosphate uridyl transferase (Galt), mRNA [NM_016658]	GO:0006012|GO:0046872|GO:0019691|GO:0016779|GO:0016740|GO:0005975|GO:0008270|GO:0008108|GO:0003824|GO:0005625	NM_016658	Mm.439669	14430	ENSMUST00000108038	TC1596376
A_51_P397823	6.75775e-05	1.88397	down	51285.9	56308.7	10.4349	9.52111	55857.8	51074	46926	56653.2	56569.8	55703.1	10.4688	10.3419	10.494	9.56806	9.51172	9.48355	NM_026305	chr17:23961855-23961796	Tceb2	Mus musculus transcription elongation factor B (SIII), polypeptide 2 (Tceb2), mRNA [NM_026305]	GO:0030891|GO:0005667|GO:0005634|GO:0005515|GO:0006350|GO:0045944|GO:0045449	NM_026305	Mm.153758	67673	ENSMUST00000069579	TC1700293
A_52_P732508	0.00012424	2.46967	down	3186.5	2659.59	6.41647	5.11216	3641.73	3301.41	2616.35	2359.71	2763.22	2855.82	6.52973	6.39043	6.32927	4.98258	5.15611	5.19778		chr18:090481117-090481057
A_51_P106527	0.00023597	2.06612	down	2663.25	2643.1	6.15477	5.10785	3099.11	2744.43	2146.22	2711.82	2595.04	2622.45	6.29696	6.12385	6.04351	5.18323	5.06552	5.07478	NM_026633	chr17:26000829-26000770	Fam195a	Mus musculus family with sequence similarity 195, member A (Fam195a), mRNA [NM_026633]	GO:0005515|GO:0008150|GO:0005575	NM_026633	Mm.328870	68241	ENSMUST00000026828	TC1579032
A_51_P439857	0.00212108	1.68866	down	739.664	907.059	4.32051	3.56463	695.425	799.265	724.302	936.866	878.027	906.283	4.14107	4.34409	4.47637	3.64988	3.5021	3.5419	NM_030046	chr15:10379415-10379356	Dnajc21	Mus musculus DnaJ (Hsp40) homolog, subfamily C, member 21 (Dnajc21), mRNA [NM_030046]	GO:0008150|GO:0003674|GO:0005575	NM_030046	Mm.297862	78244	ENSMUST00000145719	TC1633895
A_51_P430644	5.12113e-06	1.8131	down	1991.87	2272.06	5.74806	4.8896	2081.81	2110.2	1783.62	2241.05	2334.62	2240.5	5.72294	5.74472	5.77652	4.90815	4.91295	4.84769	NM_024471	chr5:65796601-65796660	Lias	Mus musculus lipoic acid synthetase (Lias), nuclear gene encoding mitochondrial protein, mRNA [NM_024471]	GO:0009105|GO:0006954|GO:0016740|GO:0051536|GO:0005739|GO:0016992|GO:0003824|GO:0006979|GO:0017140|GO:0046872|GO:0051539|GO:0008152|GO:0009107|GO:0032496	NM_024471	Mm.195776	79464	ENSMUST00000122026	TC1576426
A_52_P1128347	8.25443e-05	2.51387	down	149.983	122.719	2.00879	0.678879	174.354	148.737	126.858	126.708	119.671	121.777	2.14519	1.91818	1.963	0.763552	0.626909	0.646176	NM_013722	chr10:85511679-85511620	Syn3	Mus musculus synapsin III (Syn3), transcript variant 1, mRNA [NM_013722]	GO:0030672|GO:0031410|GO:0016020|GO:0030054|GO:0005524|GO:0045202|GO:0007269|GO:0000166|GO:0008021|GO:0003824	NM_013722	Mm.394931	27204		TC1601971
A_52_P200703	0.0692596	2.09795	down	243.301	233.83	2.62706	1.55808	161.296	368.301	200.305	153.277	287.012	261.202	2.03288	3.2263	2.62198	1.03818	1.88895	1.74711	NM_029078	chr7:99794983-99794520	Pcf11	Mus musculus cleavage and polyadenylation factor subunit homolog (S. cerevisiae) (Pcf11), mRNA [NM_029078]	GO:0008150|GO:0003674|GO:0005575	NM_029078	Mm.288645	74737	ENSMUST00000151177	TC1597638
A_52_P32893	0.00309568	2.47346	down	2966.66	2474.64	6.31813	5.0116	2720.97	2739.51	3439.51	2319.93	2528.29	2575.69	6.10922	6.12126	6.72391	4.95805	5.02793	5.04883	NM_023647	chr7:63187153-63187094	Nipa2	Mus musculus non imprinted in Prader-Willi/Angelman syndrome 2 homolog (human) (Nipa2), mRNA [NM_023647]	GO:0005769|GO:0005515|GO:0016020|GO:0005886|GO:0006811|GO:0015693|GO:0005768|GO:0016021|GO:0006810	NM_023647	Mm.333893	93790	ENSMUST00000119201	TC1593498
A_52_P194242	5.68303e-05	2.14684	down	1276.27	1230.78	5.10604	4.00383	1260.43	1399.46	1168.93	1153.06	1247.99	1291.29	4.99902	5.15221	5.1669	3.94943	4.00938	4.05268	NM_001039089	chr12:93045022-93044963	Sel1l	Mus musculus sel-1 sdownpressor of lin-12-like (C. elegans) (Sel1l), transcript variant 1, mRNA [NM_001039089]	GO:0016020|GO:0005488|GO:0007219|GO:0016021|GO:0005783	NM_001039089	Mm.250605	20338	ENSMUST00000021347	TC1637363
A_52_P619007	0.000190307	1.67413	down	956.223	1173.87	4.67966	3.93625	1033.89	1058.33	776.448	1119.58	1218.82	1183.21	4.71319	4.74913	4.57667	3.90693	3.97525	3.92657	NM_027326	chr4:87418661-87418602	Mllt3	Mus musculus myeloid/lymphoid or mixed-lineage leukemia (trithorax homolog, Drosophila); translocated to, 3 (Mllt3), transcript variant 1, mRNA [NM_027326]	GO:0005634|GO:0005515|GO:0006350|GO:0007379|GO:0006355|GO:0045449|GO:0009952	NM_027326	Mm.288898	70122	ENSMUST00000097995	TC1578398
A_51_P248999	0.00118668	2.23017	down	2346.64	2183.14	5.98729	4.83014	2287.39	2261.52	2491.01	2020.84	2234.1	2294.5	5.85881	5.84463	6.25844	4.75892	4.84946	4.88205	NM_054040	chr17:6240325-6240384	Tulp4	Mus musculus tubby like protein 4 (Tulp4), transcript variant 1, mRNA [NM_054040]	GO:0008150|GO:0003674|GO:0005737	NM_054040	Mm.477479	68842	ENSMUST00000039655	TC1573015
A_52_P385006	0.000944919	1.9719	down	118.373	124.811	1.67333	0.693738	122.968	128.566	103.585	113.181	145.994	115.257	1.64146	1.70792	1.6706	0.600675	0.913744	0.566795	NM_201374	chr7:52459966-52455701	Ccdc155	Mus musculus coiled-coil domain containing 155 (Ccdc155), mRNA [NM_201374]	GO:0016020|GO:0008150|GO:0003674|GO:0016021|GO:0005575	NM_201374	Mm.214931	384619	ENSMUST00000042672	TC1588675
A_52_P309381	0.0723075	1.55655	down	962.442	1219.98	4.62855	3.9902	1394.04	844.024	649.262	1126.93	1231.17	1301.85	5.14437	4.4227	4.31858	3.91637	3.9898	4.06443	NM_009888	chr1:141982620-141982561	Cfh	Mus musculus complement component factor h (Cfh), mRNA [NM_009888]	GO:0005634|GO:0005576|GO:0005515|GO:0030449|GO:0005886|GO:0005615|GO:0001851|GO:0006957|GO:0005737|GO:0043499|GO:0045087|GO:0008201	NM_009888	Mm.8655	12628	ENSMUST00000123238	TC1577292
A_51_P248666	0.0150064	2.04968	down	276.436	282.213	2.89371	1.85832	234.259	288.442	306.606	218.076	334.2	294.361	2.57128	2.87369	3.23617	1.54688	2.10855	1.91953	NM_021893	chr19:29462363-29462422	Cd274	Mus musculus CD274 antigen (Cd274), mRNA [NM_021893]	GO:0005515|GO:0004872|GO:0016020|GO:0042130|GO:0005886|GO:0009897|GO:0016021	NM_021893	Mm.245363	60533	ENSMUST00000016640
A_52_P309718	0.021518	1.52092	down	201.075	275.827	2.44285	1.83791	194.429	197.154	211.642	233.67	309.429	284.382	2.30242	2.32474	2.70141	1.64651	1.99744	1.86977	NM_028945	chr14:28296051-28296110	D14Abb1e	Mus musculus DNA segment, Chr 14, Abbott 1 expressed (D14Abb1e), transcript variant 2, mRNA [NM_028945]	GO:0008150|GO:0003674|GO:0005575	NM_028945	Mm.247767	218850		TC1597513
A_51_P459465	0.000609781	2.76457	down	208.45	156.351	2.49442	1.02736	199.397	204.731	221.224	166.007	150.743	152.302	2.33881	2.37914	2.76529	1.15328	0.959928	0.968874	AK083260	chr12:25747704-25747763	Kidins220	Mus musculus adult male hippocampus cDNA, RIKEN full-length enriched library, clone:C630031M24 product:KIDINS220 homolog [Rattus norvegicus], full insert sequence. [AK083260]	GO:0008150|GO:0019887|GO:0019901|GO:0005575		Mm.250641	77480		TC1619469
A_51_P265173	0.043228	2.50957	down	125.345	102.493	1.70169	0.374248	78.4819	149.293	148.259	124.561	69.1724	113.745	0.993606	1.92356	2.18791	0.7389	-0.163896	0.547739	NM_207238	chr7:29484009-29484068	Fbxo27	Mus musculus F-box protein 27 (Fbxo27), transcript variant 2, mRNA [NM_207238]	GO:0005515|GO:0008150|GO:0003674|GO:0005575|GO:0030163	NM_207238	Mm.116116	233040	ENSMUST00000108280	TC1582697
A_52_P244803	0.00139446	2.24513	down	507.055	470.558	3.77825	2.61145	505.298	510.502	505.365	536.436	443.174	432.065	3.68031	3.69733	3.95711	2.84545	2.51571	2.47319	XM_001001707	chr9:43088033-43088092	D630033O11Rik	PREDICTED: Mus musculus RIKEN cDNA D630033O11 gene (D630033O11Rik), mRNA [XM_001001707]	GO:0008150|GO:0003674|GO:0005575	XM_001001707	Mm.135745	235302		TC1669611
A_51_P108862	0.000292604	1.92602	down	11689.2	12585.8	8.30452	7.35889	12037.4	11813.8	11216.5	13054.6	12605.9	12096.9	8.25455	8.22974	8.42926	7.45046	7.34579	7.28043	NM_012003	chr6:124908990-124908931	Cops7a	Mus musculus COP9 (constitutive photomorphogenic) homolog, subunit 7a (Arabidopsis thaliana) (Cops7a), transcript variant 1, mRNA [NM_012003]	GO:0005634|GO:0008180|GO:0008150|GO:0003674|GO:0005737|GO:0005575	NM_012003	Mm.244536	26894	ENSMUST00000032220	TC1575005
A_52_P175304	0.018134	2.60839	down	767.146	589.731	4.32449	2.94133	533.962	739.663	1027.81	539.901	617.51	611.784	3.75991	4.23228	4.98129	2.85474	2.9943	2.97496	NM_013771	chr2:23053737-23053796	Yme1l1	Mus musculus YME1-like 1 (S. cerevisiae) (Yme1l1), nuclear gene encoding mitochondrial protein, mRNA [NM_013771]	GO:0006508|GO:0016787|GO:0046872|GO:0016020|GO:0005524|GO:0004222|GO:0017111|GO:0008233|GO:0005739|GO:0008237|GO:0000166|GO:0030163	NM_013771	Mm.23335	27377	ENSMUST00000028117	TC1574430
A_51_P191669	0.000217273	3.49916	down	25694.9	14891.6	9.40836	7.60135	31563.9	26799.8	18720.9	14609.8	14416.3	15648.6	9.6453	9.41149	9.16829	7.61283	7.53939	7.65183	NM_007694	chr2:132620703-132620762	Chgb	Mus musculus chromogranin B (Chgb), mRNA [NM_007694]	GO:0005576|GO:0005515|GO:0030141	NM_007694	Mm.255241	12653	ENSMUST00000028826	TC1572022
A_51_P393518	2.6389e-06	4.85867	down	147.456	62.4176	1.98325	-0.297315	157.57	164.294	120.505	59.7054	61.5446	66.0028	1.99916	2.06169	1.88888	-0.322026	-0.332459	-0.237462	NM_001024720	chr1:152410493-152410434	Hmcn1	Mus musculus hemicentin 1 (Hmcn1), mRNA [NM_001024720]	GO:0005576|GO:0008150|GO:0003674|GO:0030054|GO:0005604|GO:0005938	NM_001024720	Mm.379425	545370	ENSMUST00000074783	TC1604028
A_52_P330984	0.0138663	2.43447	down	573.521	481.606	3.92691	2.6433	503.408	475.903	741.251	410.651	506.307	527.86	3.6749	3.59608	4.50975	2.45996	2.70785	2.7621	NM_001103182	chr1:182620528-182620587	Lin9	Mus musculus lin-9 homolog (C. elegans) (Lin9), transcript variant 1, mRNA [NM_001103182]	GO:0005634|GO:0006260|GO:0007049	NM_001103182	Mm.275044	72568	ENSMUST00000085803	TC1619130
A_52_P294253	0.00104852	1.74036	down	213.25	254.294	2.52776	1.72837	223.183	211.799	204.768	265.148	235.367	262.367	2.5014	2.42811	2.65377	1.82884	1.60275	1.75353	NM_011759	chr15:75455531-75455590	Zfp41	Mus musculus zinc finger protein 41 (Zfp41), transcript variant 1, mRNA [NM_011759]	GO:0006350|GO:0008150|GO:0007275|GO:0030154|GO:0007283|GO:0045449|GO:0005634|GO:0003674|GO:0046872|GO:0003677|GO:0008270|GO:0005575|GO:0005622	NM_011759	Mm.87210	22701	ENSMUST00000054555	TC1677026
A_51_P444379	0.000461209	1.7349	down	1302.49	1557.69	5.13901	4.34416	1312.41	1329.63	1265.42	1477.41	1625.52	1570.15	5.05732	5.07837	5.28133	4.30704	4.39066	4.33477	NM_198294	chr2:59683637-59683696	Tanc1	Mus musculus tetratricopeptide repeat, ankyrin repeat and coiled-coil containing 1 (Tanc1), mRNA [NM_198294]	GO:0045211|GO:0016020|GO:0008150|GO:0003674|GO:0030054|GO:0005886|GO:0045202|GO:0005488|GO:0005575	NM_198294	Mm.27917	66860	ENSMUST00000112568	TC1575754
A_52_P636427	0.0150335	2.15634	down	60.276	57.191	0.680094	-0.428493	45.0428	67.2898	68.4956	52.314	54.489	64.77	0.192543	0.773873	1.07386	-0.512689	-0.508128	-0.264661	NM_021319	chr17:32555397-32555338	Pglyrp2	Mus musculus peptidoglycan recognition protein 2 (Pglyrp2), mRNA [NM_021319]	GO:0005576|GO:0005515|GO:0016787|GO:0008745|GO:0046872|GO:0016020|GO:0009253|GO:0016019	NM_021319	Mm.476916	57757	ENSMUST00000114454	NP921144
A_51_P134574	0.00507277	2.21641	down	103.14	97.3214	1.47584	0.327623	93.221	113.992	102.208	103.826	77.2796	110.859	1.2419	1.53434	1.65129	0.476212	-0.004004	0.51066	NM_023420	chr13:97407793-97407852	Col4a3bp	Mus musculus collagen, type IV, alpha 3 (Goodpasture antigen) binding protein (Col4a3bp), transcript variant 1, mRNA [NM_023420]	GO:0007029|GO:0034976|GO:0008283|GO:0001701|GO:0006869|GO:0000902|GO:0005739|GO:0006672|GO:0007165|GO:0003007|GO:0006810|GO:0070584|GO:0005829|GO:0016301|GO:0005737|GO:0055088|GO:0006936|GO:0005783|GO:0005794	NM_023420	Mm.24125	68018		TC1580984
A_51_P277199	0.000184441	2.89531	down	402.834	289.152	3.44567	1.91195	387.52	416.788	404.195	264.926	286.175	316.357	3.29744	3.40473	3.63483	1.82763	1.88473	2.02349	NM_153528	chr16:43980865-43980806	Gramd1c	Mus musculus GRAM domain containing 1C (Gramd1c), transcript variant 1, mRNA [NM_153528]	GO:0016020|GO:0008150|GO:0003674|GO:0016021|GO:0005575	NM_153528	Mm.19316	207798	ENSMUST00000036174	TC1580642
A_51_P481788	0.00886439	1.58758	down	1517.81	1980.62	5.35843	4.6916	1442.88	1494.93	1615.63	1962.32	1950.08	2029.46	5.19405	5.24742	5.63381	4.71653	4.6533	4.70496	NM_011949	chr16:17047243-17047302	Mapk1	Mus musculus mitogen-activated protein kinase 1 (Mapk1), transcript variant 1, mRNA [NM_011949]	GO:0004672|GO:0004707|GO:0043204|GO:0009887|GO:0005524|GO:0050853|GO:0031663|GO:0000189|GO:0000166|GO:0019858|GO:0005634|GO:0045596|GO:0005829|GO:0033267|GO:0000165|GO:0032839|GO:0006468|GO:0016301|GO:0031435|GO:0050852|GO:0043330|GO:0005515|GO:0045727|GO:0005626|GO:0016740|GO:0043234|GO:0001784|GO:0060716|GO:0007049|GO:0042221|GO:0007165|GO:0006974|GO:0008134|GO:0016908|GO:0004674|GO:0009636|GO:…	NM_011949	Mm.196581	26413	ENSMUST00000069107	TC1605197
A_51_P138790	0.000129818	3.10921	down	1644.52	1095.36	5.47293	3.83639	1523.2	1773.23	1637.13	1052.2	1088.54	1145.33	5.2722	5.49372	5.65288	3.81737	3.81216	3.87963	NM_175175	chr4:10916484-10916425	Plekhf2	Mus musculus pleckstrin homology domain containing, family F (with FYVE domain) member 2 (Plekhf2), mRNA [NM_175175]	GO:0046872|GO:0008270	NM_175175	Mm.34351	71801	ENSMUST00000054776	TC1780601
A_51_P168646	0.00421683	1.87775	down	166.199	182.457	2.15855	1.24955	193.577	145.091	159.928	194.898	171.793	180.681	2.29608	1.88237	2.29721	1.38476	1.14851	1.21538	AK149219	chr14:68706866-68706925	Nefl	neurofilament, light polypeptide Gene [Source:MGI Symbol;Acc:MGI:97313] [ENSMUST00000022639]	GO:0005515|GO:0048812|GO:0005882|GO:0043524|GO:0045110|GO:0014012|GO:0000226|GO:0060052|GO:0031133|GO:0005198|GO:0030424|GO:0051258|GO:0019904|GO:0040011|GO:0043274|GO:0043005|GO:0005883|GO:0050772|GO:0045109|GO:0050885		Mm.1956	18039	ENSMUST00000022639	TC1607814
A_51_P219888	0.0123581	2.45066	down	62.4115	52.3458	0.727192	-0.565979	46.2831	74.9199	66.0316	58.0239	41.749	57.2644	0.23173	0.928834	1.02101	-0.363239	-0.89235	-0.442348	NM_146731	chr7:110487045-110487104	Olfr599	Mus musculus olfactory receptor 599 (Olfr599), mRNA [NM_146731]	GO:0004872|GO:0004984|GO:0004930|GO:0007608|GO:0007186|GO:0004871|GO:0016021|GO:0007165	NM_146731	Mm.377659	258726	ENSMUST00000098201	NP646854
A_52_P140049	7.94444e-05	2.71812	down	6512.06	4966.94	7.45975	6.01714	6923.84	6301.6	6310.74	4874.5	4789.62	5236.69	7.45667	7.32306	7.59952	6.02922	5.94968	6.07252	NM_178899	chr6:3407699-3407640	Hepacam2	Mus musculus HEPACAM family member 2 (Hepacam2), mRNA [NM_178899]	GO:0016020|GO:0008150|GO:0003674|GO:0016021|GO:0005575	NM_178899	Mm.206911	101202	ENSMUST00000049985	TC1582520
A_52_P26386	0.000600267	2.57025	down	249.263	202.302	2.74642	1.38451	258.589	273.733	215.467	163.345	234.102	209.459	2.71383	2.79818	2.72725	1.12996	1.59497	1.42861	NM_001127189	chr4:147128667-147128608	Gm13157	Mus musculus predicted gene 13157 (Gm13157), mRNA [NM_001127189]	GO:0008150|GO:0003674|GO:0005575	NM_001127189	Mm.440977	100041677	ENSMUST00000122309	TC1583681
A_51_P413461	0.0302389	1.79822	down	1764.49	2015.64	5.55942	4.71285	1550.2	1574	2169.27	1812.44	2182.18	2052.3	5.29756	5.32178	6.05892	4.60191	4.81554	4.72111	NM_011960	chr14:33110162-33110221	Parg	Mus musculus poly (ADP-ribose) glycohydrolase (Parg), mRNA [NM_011960]	GO:0005792|GO:0045739|GO:0006974|GO:0005634|GO:0016787|GO:0016045|GO:0005829|GO:0004649|GO:0005975|GO:0000785|GO:0003682|GO:0005625	NM_011960	Mm.15962	26430	ENSMUST00000022470	TC1660470
A_52_P556804	0.000806504	2.7051	down	1320.88	1009.53	5.15462	3.71894	1382.42	1170.43	1409.78	969.19	1038.37	1021.04	5.1323	4.89438	5.43718	3.69882	3.74409	3.71391		chr2:9977846-9977787								TC1653151
A_51_P500051	0.00669597	1.62746	down	2473.69	3120.83	6.04528	5.34265	2559.17	2909.53	1952.36	3459.95	3087.12	2815.41	6.02078	6.20813	5.90693	5.53472	5.31603	5.17721	NM_019923	chr6:146060089-146060030	Itpr2	Mus musculus inositol 1,4,5-triphosphate receptor 2 (Itpr2), transcript variant 1, mRNA [NM_019923]	GO:0005792|GO:0006816|GO:0004872|GO:0015278|GO:0055085|GO:0005216|GO:0030424|GO:0005262|GO:0005938|GO:0016529|GO:0006810|GO:0008095|GO:0016020|GO:0043209|GO:0005220|GO:0006811|GO:0005737|GO:0035091|GO:0016021|GO:0005783	NM_019923	Mm.7800	16439	ENSMUST00000111674	TC1580246
A_52_P152926	0.068586	1.87474	down	97.1558	113.93	1.39414	0.487446	94.5842	97.0153	99.8678	64.5302	138.488	138.772	1.26284	1.3017	1.61787	-0.20991	0.837597	0.834652	NM_025822	chr3:67160260-67160319	Rsrc1	Mus musculus arginine/serine-rich coiled-coil 1 (Rsrc1), mRNA [NM_025822]	GO:0005634|GO:0005515|GO:0016607|GO:0000380|GO:0008380|GO:0006468|GO:0046677|GO:0006913	NM_025822	Mm.316418	66880	ENSMUST00000065074	TC1594372
A_52_P228236	0.0165502	2.11486	down	2192.48	2130.61	5.87034	4.78978	2039.82	1828.3	2709.33	1840.16	2219.35	2332.33	5.69355	5.53784	6.37965	4.6238	4.8399	4.90564	NM_011638	chr16:32632255-32632314	Tfrc	Mus musculus transferrin receptor (Tfrc), mRNA [NM_011638]	GO:0004872|GO:0006897|GO:0005886|GO:0005739|GO:0005768|GO:0008233|GO:0006508|GO:0016020|GO:0048471|GO:0004998|GO:0006879|GO:0016021|GO:0016023|GO:0005381	NM_011638	Mm.28683	22042	ENSMUST00000023486	TC1573444
A_51_P119841	0.000509487	3.02763	down	235.614	159.073	2.64441	1.04622	268.106	265.289	173.447	159.8	139.103	178.316	2.76598	2.75298	2.41428	1.09831	0.843986	1.19637		chr6:142252075-142252132
A_52_P393208	0.00423024	2.69074	down	70.2455	54.3508	0.89716	-0.530841	76.0279	83.1094	51.5993	39.1701	56.7662	67.116	0.947774	1.0785	0.665207	-0.930133	-0.449059	-0.213332	NM_001007575	chr13:67591595-67591536	Zfp58	Mus musculus zinc finger protein 58 (Zfp58), mRNA [NM_001007575]	GO:0003676|GO:0005634|GO:0046872|GO:0008150|GO:0003674|GO:0003677|GO:0008270|GO:0005575|GO:0005622	NM_001007575	Mm.478914	238693		TC1628442
A_51_P253359	0.00013492	1.95676	down	2463.98	2601.11	6.05325	5.08478	2768.08	2386.26	2237.59	2547.8	2657.56	2597.96	6.13399	5.92209	6.10366	5.09322	5.09987	5.06125	NM_025670	chr16:4767028-4766969	5730403B10Rik	Mus musculus RIKEN cDNA 5730403B10 gene (5730403B10Rik), mRNA [NM_025670]	GO:0042771|GO:0005634|GO:0033209|GO:0006917|GO:0006915	NM_025670	Mm.157648	66626	ENSMUST00000118703	TC1572309
A_52_P1108967	0.0559135	2.3296	down	84.3195	78.2545	1.16536	-0.0547247	63.9145	89.577	99.4669	89.6426	44.5523	100.569	0.697388	1.18661	1.61207	0.264298	-0.798593	0.370121	AK141756	chr5:123847887-123847946		Mus musculus 9 days embryo whole body cDNA, RIKEN full-length enriched library, clone:D030054O03 product:unclassifiable, full insert sequence. [AK141756]			Mm.442499
A_51_P501002	0.000410625	3.02245	down	41.2789	28.3437	0.154971	-1.44075	37.8591	45.8109	40.1667	28.8417	31.139	25.0506	-0.058116	0.219176	0.303853	-1.37173	-1.31537	-1.63514	AK017575	chr1:78591754-78591695	5730419F03Rik	Mus musculus 8 days embryo whole body cDNA, RIKEN full-length enriched library, clone:5730419F03 product:unclassifiable, full insert sequence. [AK017575]	GO:0008150|GO:0003674|GO:0005575		Mm.462998	70537		NP741061
A_52_P460136	0.0247359	1.83938	down	44.9801	49.7028	0.244133	-0.635087	36.4949	60.4107	38.0347	54.8882	41.6019	52.6181	-0.111061	0.61829	0.22517	-0.44339	-0.897441	-0.564428	X96703	chr11:97668100-97668159		LIM and SH3 protein 1 Gene [Source:MGI Symbol;Acc:MGI:109656] [ENSMUST00000153520]			Mm.271967		ENSMUST00000153520	TC1727631
A_51_P462963	0.00437911	2.25393	down	27.014	24.7857	-0.459548	-1.63199	23.8077	26.7115	30.5226	23.9387	27.2242	23.1942	-0.727324	-0.559052	-0.092267	-1.64054	-1.5092	-1.74622	AK077897	chr6:92096089-92096148		Mus musculus 13 days embryo male testis cDNA, RIKEN full-length enriched library, clone:6030423C18 product:lysyl-tRNA synthetase, pseudogene 1, full insert sequence. [AK077897]			Mm.87062
A_52_P456664	2.5162e-05	3.56261	down	152.675	88.0433	2.03294	0.200008	151.543	178.855	127.627	89.6426	85.9951	88.4922	1.9429	2.18421	1.97171	0.264299	0.150162	0.185562	AK014677	chr8:10901888-10901947	4833411C07Rik	Mus musculus 0 day neonate head cDNA, RIKEN full-length enriched library, clone:4833411C07 product:unclassifiable, full insert sequence. [AK014677]	GO:0008150|GO:0003674|GO:0005575		Mm.139075	71624		TC1599336
A_52_P352967	6.49107e-05	3.58905	down	724.068	420.488	4.29103	2.44742	747.31	742.445	682.448	363.138	423.976	474.351	4.24488	4.2377	4.3905	2.28256	2.45182	2.6079	BC027244	chr18:67953373-67953374	Seh1l	Mus musculus SEH1-like (S. cerevisiae, mRNA (cDNA clone MGC:27929 IMAGE:3584697), complete cds. [BC027244]	GO:0005643|GO:0007059|GO:0008150|GO:0007067|GO:0015031|GO:0055085|GO:0007049|GO:0051301|GO:0006810|GO:0005634|GO:0003674|GO:0000776|GO:0005575|GO:0051028		Mm.476803	72124		TC1572791
A_51_P170346	0.0594928	1.74625	down	154.077	180.14	2.03158	1.22732	126.462	137.744	198.024	195.551	186.408	158.461	1.68188	1.8074	2.60546	1.38959	1.2663	1.02606	NM_027389	chr3:88641421-88650347	Gon4l	Mus musculus gon-4-like (C.elegans) (Gon4l), mRNA [NM_027389]	GO:0005634|GO:0008150|GO:0003674|GO:0003677|GO:0006355|GO:0005575	NM_027389	Mm.126870	76022	ENSMUST00000107498	TC1642168
A_51_P203597	1.05552e-05	1.51209	down	5230.76	7132.46	7.13666	6.54012	5568.94	5667.28	4456.06	6992.25	7170.09	7235.05	7.1425	7.17	7.09748	6.54973	6.53175	6.53887	NM_026591	chr3:87727137-87727196	Mrpl24	Mus musculus mitochondrial ribosomal protein L24 (Mrpl24), nuclear gene encoding mitochondrial protein, mRNA [NM_026591]	GO:0005840|GO:0003735|GO:0008150|GO:0003674|GO:0006412|GO:0005739|GO:0030529|GO:0005622	NM_026591	Mm.393802	67707	ENSMUST00000119968	TC1603334
A_52_P527500	0.00134784	2.39063	down	1348.85	1167.6	5.1867	3.92931	1269.04	1303.91	1473.61	1148.36	1183.48	1170.98	5.00884	5.05018	5.50107	3.94354	3.9328	3.91158	NM_080446	chr10:119520881-119520822	Helb	Mus musculus helicase (DNA) B (Helb), mRNA [NM_080446]	GO:0006269|GO:0004386|GO:0016787|GO:0006261|GO:0005524|GO:0004003|GO:0000166|GO:0005575	NM_080446	Mm.214703	117599	ENSMUST00000020449	TC1581348
A_52_P707923	0.000132472	2.88545	down	41.0864	29.4058	0.146476	-1.38232	46.6539	38.096	38.5093	30.3297	28.5715	29.316	0.243244	-0.046876	0.24306	-1.29915	-1.43951	-1.4083	AK080474	chr3:19911298-19911357		Mus musculus 7 days neonate cerebellum cDNA, RIKEN full-length enriched library, clone:A730036D06 product:unclassifiable, full insert sequence. [AK080474]						TC1631209
A_51_P395405	0.000619681	1.70712	down	728.441	884.644	4.2942	3.52264	769.701	783.978	631.645	769.815	947.595	936.522	4.28747	4.31623	4.2789	3.36655	3.61211	3.58925	NM_175174	chr5:65558747-65558806	Klhl5	Mus musculus kelch-like 5 (Drosophila) (Klhl5), mRNA [NM_175174]		NM_175174	Mm.10281	71778	ENSMUST00000101191	TC1695276
A_52_P559955	0.00506921	1.65504	down	42.1675	52.8491	0.189403	-0.537464	40.5358	41.7838	44.1828	50.4238	52.1793	55.9444	0.0404406	0.0864305	0.441339	-0.565782	-0.570615	-0.475995	NM_008726	chr4:147360064-147360123	Nppb	Mus musculus natriuretic peptide precursor type B (Nppb), mRNA [NM_008726]	GO:0005179|GO:0005634|GO:0005576|GO:0048471|GO:0008217|GO:0005615|GO:0050880|GO:0005737|GO:0051428|GO:0006182	NM_008726	Mm.2740	18158	ENSMUST00000103231	TC1585144
A_51_P394244	0.000318581	2.47996	down	9486.5	7786.14	7.97673	6.66641	10555.1	10877.6	7026.77	7606.21	8024.92	7727.29	8.06497	8.11063	7.75457	6.67115	6.69425	6.63383	NM_001080925	chr11:98714229-98714288	Rapgefl1	Mus musculus Rap guanine nucleotide exchange factor (GEF)-like 1 (Rapgefl1), mRNA [NM_001080925]	GO:0008150|GO:0003674|GO:0007264|GO:0005085|GO:0005575|GO:0005622	NM_001080925	Mm.340766	268480	ENSMUST00000107480	TC1618129
A_51_P354572	0.00350883	1.57075	down	4880.72	6443.97	7.04499	6.39353	4794.56	4875.22	4972.39	6263.54	6533.48	6534.89	6.9265	6.95281	7.25565	6.39095	6.39762	6.39203	NM_198163	chr5:116097100-116097159	Rab35	Mus musculus RAB35, member RAS oncogene family (Rab35), mRNA [NM_198163]	GO:0016020|GO:0008150|GO:0003674|GO:0015031|GO:0007264|GO:0005886|GO:0005525|GO:0005739|GO:0000166|GO:0006810	NM_198163	Mm.27553	77407	ENSMUST00000031492	TC1577146
A_52_P231635	0.000180216	1.75343	down	136.156	160.822	1.87899	1.06881	137.057	145.22	126.189	162.324	165.554	154.588	1.79795	1.88366	1.95537	1.12092	1.09514	0.990369	NM_027695	chr14:17073333-17073274	Oxsm	Mus musculus 3-oxoacyl-ACP synthase, mitochondrial (Oxsm), nuclear gene encoding mitochondrial protein, mRNA [NM_027695]	GO:0008610|GO:0004315|GO:0008415|GO:0008152|GO:0016747|GO:0006633|GO:0016740|GO:0009058|GO:0005739|GO:0003824	NM_027695	Mm.197960	71147	ENSMUST00000112624	TC1595693
A_51_P352968	0.000450432	2.67113	down	7797.12	6044.03	7.71867	6.30122	8058.91	7182.25	8150.2	5925.9	6143.75	6062.43	7.67569	7.51178	7.96855	6.31101	6.30888	6.28376	NM_008538	chr10:36854835-36854776	Marcks	Mus musculus myristoylated alanine rich protein kinase C substrate (Marcks), mRNA [NM_008538]	GO:0016020|GO:0042585|GO:0005516|GO:0005856|GO:0005737|GO:0005080|GO:0005938|GO:0003779|GO:0005813	NM_008538	Mm.479533	17118	ENSMUST00000092584	TC1573300
A_52_P433450	0.00101686	1.63284	down	112.145	142.545	1.60005	0.892667	112.432	118.104	105.898	138.848	154.679	134.108	1.51222	1.58547	1.70246	0.895548	0.997117	0.785334		chr9:064260763-064260704
A_52_P82722	0.0168256	1.73521	down	291.536	336.228	2.9262	2.13109	333.05	353.051	188.505	310.719	342.627	355.338	3.07891	3.16529	2.53439	2.05765	2.14448	2.19113	NM_009988	chr16:78329218-78329277	Cxadr	Mus musculus coxsackie virus and adenovirus receptor (Cxadr), transcript variant 2, mRNA [NM_009988]	GO:0048739|GO:0005923|GO:0004872|GO:0005515|GO:0005576|GO:0005886|GO:0007005|GO:0007507|GO:0005911|GO:0007155|GO:0016020|GO:0030054|GO:0060044|GO:0045216|GO:0016021	NM_009988	Mm.66222	13052	ENSMUST00000114229	TC1738764
A_51_P350091	0.000479751	3.00835	down	121.35	81.943	1.68126	0.092284	141.157	136.468	86.4264	76.7617	78.0101	91.057	1.84048	1.79397	1.40933	0.0405011	0.00956917	0.226782	AF153046	chr5:29800104-29800045	Mnx1	motor neuron and pancreas homeobox 1 Gene [Source:MGI Symbol;Acc:MGI:109160] [ENSMUST00000001608]	GO:0021904|GO:0031018|GO:0048812|GO:0003700|GO:0021675|GO:0060539|GO:0006350|GO:0030182|GO:0008045|GO:0006355|GO:0045449|GO:0021953|GO:0031016|GO:0030528|GO:0005634|GO:0009791|GO:0043565|GO:0001764|GO:0003677|GO:0021520|GO:0060541|GO:0048667		Mm.103760	15285	ENSMUST00000001608	TC1588940
A_52_P613167	0.000622202	2.929	down	280.076	198.64	2.91947	1.36906	258.855	282.892	298.481	177.877	199.787	218.256	2.71532	2.84567	3.19742	1.25293	1.3663	1.48796	NM_027264	chr7:50552792-50552733	Zfp715	Mus musculus zinc finger protein 715 (Zfp715), mRNA [NM_027264]	GO:0046872|GO:0008150|GO:0003674|GO:0005575	NM_027264	Mm.45367	69930	ENSMUST00000048015	TC1579142
A_51_P450952	0.0131619	1.64657	down	175.121	217.854	2.2267	1.50724	212.699	146.013	166.651	215.046	219.457	219.059	2.43199	1.89151	2.35661	1.52669	1.50178	1.49326	AK029271	chr11:100269854-100269795	1110036O03Rik	RIKEN cDNA 1110036O03 gene Gene [Source:MGI Symbol;Acc:MGI:1913430] [ENSMUST00000066489]	GO:0005634|GO:0008150|GO:0003674|GO:0000795		Mm.4940	66180	ENSMUST00000066489
A_52_P357611	0.0160182	2.0195	down	100.339	104.548	1.43584	0.42184	92.8331	95.7607	112.423	77.9553	120.587	115.102	1.23588	1.28292	1.78872	0.0627608	0.637909	0.56485	NM_016720	chr7:106960012-106959953	Neu3	Mus musculus neuraminidase 3 (Neu3), mRNA [NM_016720]	GO:0016787|GO:0016020|GO:0016798|GO:0008152|GO:0005886|GO:0005975|GO:0004308|GO:0016997	NM_016720	Mm.103703	50877	ENSMUST00000036331	TC1586763
A_52_P883283	0.00583955	1.73875	down	143.323	172.77	1.95297	1.15492	147.665	150.458	131.844	135.946	191.19	191.174	1.9055	1.93478	2.01862	0.865078	1.30285	1.29683	AK034355	chr13:34429379-34429320		Mus musculus adult male diencephalon cDNA, RIKEN full-length enriched library, clone:9330181K24 product:unclassifiable, full insert sequence. [AK034355]						TC1622549
A_52_P161087	0.000117762	1.60422	down	257.192	331.832	2.79351	2.11163	275.442	269.748	226.387	304.61	337.404	353.481	2.80492	2.77703	2.79858	2.02901	2.12231	2.18357	NM_001004362	chr10:78527685-78527626	2610008E11Rik	Mus musculus RIKEN cDNA 2610008E11 gene (2610008E11Rik), mRNA [NM_001004362]	GO:0046872|GO:0008150|GO:0003674|GO:0005575	NM_001004362	Mm.297854	72128	ENSMUST00000039271	TC1581027
A_51_P216015	0.00261037	1.51476	down	210.564	289.095	2.50931	1.91022	212.481	219.385	199.827	255.564	312.029	299.691	2.43051	2.47888	2.61853	1.77572	2.00952	1.94542	NR_028264	chr14:62222002-62221943	Dleu2	Mus musculus deleted in lymphocytic leukemia, 2 (Dleu2), non-coding RNA [NR_028264]	GO:0008150|GO:0003674|GO:0005575	NR_028264	Mm.32886	668253		TC1599180
A_51_P205481	0.000286101	3.22666	down	7152.19	4602.78	7.59528	5.90524	7062.85	6853.11	7540.62	4270.51	5007.42	4530.41	7.48535	7.4441	7.85639	5.83838	6.01383	5.86351	NM_144843	chr14:60920995-60921054	Mtmr6	Mus musculus myotubularin related protein 6 (Mtmr6), mRNA [NM_144843]	GO:0016311|GO:0005634|GO:0016787|GO:0008150|GO:0003674|GO:0016791|GO:0004725|GO:0005575	NM_144843	Mm.247007	219135	ENSMUST00000022563	TC1575220
A_51_P227703	0.000253164	3.1681	down	3738.38	2449.03	6.65987	4.99625	3633.75	3694.36	3887.02	2505.94	2561.41	2279.73	6.52656	6.55267	6.90038	5.06932	5.0467	4.87273	NM_001081548	chr2:69861809-69861868	Ubr3	Mus musculus ubiquitin protein ligase E3 component n-recognin 3 (Ubr3), transcript variant 1, mRNA [NM_001081548]	GO:0005515|GO:0006511|GO:0001701|GO:0007608|GO:0046872|GO:0016020|GO:0001967|GO:0004842|GO:0008270|GO:0009790|GO:0042048|GO:0005575|GO:0016021|GO:0016874	NM_001081548	Mm.314576	68795	ENSMUST00000055758	TC1719070
A_51_P172573	0.000203299	1.93246	down	10911.2	11706.5	8.20551	7.25508	11097.1	11024	10612.4	11616.5	11722.7	11780.2	8.13722	8.12992	8.34939	7.28207	7.241	7.24216	NM_013671	chr17:13208074-13208133	Sod2	Mus musculus sdowneroxide dismutase 2, mitochondrial (Sod2), nuclear gene encoding mitochondrial protein, mRNA [NM_013671]	GO:0001889|GO:0048147|GO:0004784|GO:0030097|GO:0045599|GO:0048666|GO:0043066|GO:0050665|GO:0042311|GO:0007605|GO:0045429|GO:0010332|GO:0048773|GO:0005743|GO:0042542|GO:0008217|GO:0050790|GO:0055072|GO:0014823|GO:0003069|GO:0007005|GO:0051881|GO:0016491|GO:0007507|GO:0001836|GO:0000303|GO:0005737|GO:0003032|GO:0006915|GO:0006749|GO:0055093|GO:0019825|GO:0007626|GO:0048678|GO:0019430|GO:0001306|GO:…	NM_013671	Mm.290876	20656	ENSMUST00000007012	TC1572750
A_51_P322531	3.20982e-05	2.91264	down	325.891	232.04	3.14017	1.59784	326.085	334.507	317.082	225.37	230.929	239.822	3.04842	3.08745	3.28464	1.59434	1.57529	1.6239	NM_019797	chr9:65677026-65676967	Trip4	Mus musculus thyroid hormone receptor interactor 4 (Trip4), transcript variant 1, mRNA [NM_019797]	GO:0030528|GO:0005634|GO:0046872|GO:0008150|GO:0006350|GO:0003674|GO:0005737|GO:0008270|GO:0005575|GO:0045449	NM_019797	Mm.208379	56404		TC1626829
A_52_P834112	0.00374121	1.55217	down	84.2301	112.852	1.18772	0.553433	82.4364	88.2489	82.0049	102.893	110.175	125.487	1.06453	1.16506	1.33356	0.463187	0.507633	0.68948	XM_001472916	chr13:108832534-108832475	3021401N23Rik	PREDICTED: Mus musculus RIKEN cDNA 3021401N23 gene (3021401N23Rik), mRNA [XM_001472916]	GO:0008150|GO:0003674|GO:0005575	XM_001472916	Mm.149413	70680
A_52_P62223	5.41453e-06	2.74406	down	7984.22	6029.92	7.75347	6.29716	8219.56	8293.92	7439.2	5739.86	6178.42	6171.49	7.70416	7.7194	7.83686	6.26499	6.317	6.30949	NM_009163	chr10:60561522-60561463	Sgpl1	Mus musculus sphingosine phosphate lyase 1 (Sgpl1), mRNA [NM_009163]	GO:0008210|GO:0030097|GO:0033327|GO:0016831|GO:0008117|GO:0007283|GO:0003824|GO:0040014|GO:0030170|GO:0008585|GO:0006629|GO:0010761|GO:0016020|GO:0048008|GO:0016021|GO:0008209|GO:0001570|GO:0060021|GO:0048705|GO:0001553|GO:0019752|GO:0001822|GO:0009791|GO:0016829|GO:0060325|GO:0006807|GO:0006915|GO:0005783	NM_009163	Mm.412319	20397	ENSMUST00000150258	TC1700475
A_52_P898478	0.00014447	2.87033	down	6408.52	4631.16	7.43788	5.91666	6375.25	6310.5	6539.81	4454.89	4767.79	4670.81	7.33758	7.3251	7.65096	5.89936	5.94308	5.90754	BG969555	chr13:43633971-43633912		602837356F1 NCI_CGAP_Kid14 Mus musculus cDNA clone IMAGE:4971901 5', mRNA sequence [BG969555]			Mm.458619			TC1633660
A_52_P24593	0.000373228	2.13541	down	622.22	604.646	4.07349	2.97897	629.741	620.977	615.941	620.714	572.24	620.984	3.99793	3.97995	4.24258	3.05597	2.88446	2.9965	NM_029492	chr14:58458011-58457952	Zdhhc20	Mus musculus zinc finger, DHHC domain containing 20 (Zdhhc20), mRNA [NM_029492]	GO:0046872|GO:0016020|GO:0008150|GO:0003674|GO:0008415|GO:0016740|GO:0008270|GO:0016021|GO:0005575	NM_029492	Mm.29044	75965	ENSMUST00000022541	TC1771107
A_52_P645675	0.0394146	2.94087	down	82.4054	53.8826	1.03637	-0.519875	50.4562	66.0159	130.744	56.345	44.7468	60.556	0.356276	0.746299	2.00653	-0.405598	-0.792308	-0.361719		chr17:34960055-34960114
A_51_P354132	0.000369812	2.36002	down	5989.5	5261.81	7.34022	6.10142	5992.67	5845.93	6129.88	5280.11	5233.32	5272.02	7.2483	7.21478	7.55757	6.14454	6.07749	6.08222	NM_206534	chr12:77883875-77883934	Churc1	Mus musculus churchill domain containing 1 (Churc1), mRNA [NM_206534]	GO:0005634|GO:0016563|GO:0046872|GO:0006350|GO:0007275|GO:0003677|GO:0045941|GO:0045944|GO:0008270|GO:0007498|GO:0045449	NM_206534	Mm.80970	211151	ENSMUST00000126408	TC1595380
A_52_P235278	0.00692643	1.74146	down	129.866	156.356	1.80999	1.0097	140.098	130.346	119.153	122.053	175.671	171.343	1.82961	1.72776	1.8726	0.709549	1.18071	1.13882	NM_153556	chr1:53246192-53246133	Pms1	Mus musculus postmeiotic segregation increased 1 (S. cerevisiae) (Pms1), mRNA [NM_153556]	GO:0003674|GO:0006298|GO:0005575	NM_153556	Mm.60499	227099	ENSMUST00000027267	TC1580834
A_52_P441954	0.00324938	3.16354	down	663.231	431.149	4.12938	2.46784	547.707	881.789	560.195	324.998	487.864	480.584	3.79658	4.48585	4.10571	2.12247	2.65431	2.62673	NM_019935	chr19:5549268-5549209	Ovol1	Mus musculus OVO homolog-like 1 (Drosophila) (Ovol1), mRNA [NM_019935]	GO:0003700|GO:0006350|GO:0007283|GO:0008544|GO:0045449|GO:0005634|GO:0000239|GO:0046872|GO:0003677|GO:0008270|GO:0007498|GO:0000122|GO:0005622	NM_019935	Mm.280225	18426	ENSMUST00000025861	TC1582281
A_52_P457382	0.000735251	2.98803	down	2716.24	1881.48	6.19558	4.61639	2613.16	2530.38	3005.16	1774.36	1900.59	1969.48	6.0509	6.0067	6.52915	4.57127	4.61621	4.66168	AK135203	chr14:21327195-21327136	Ppp3cb	Mus musculus 12 days embryo male wolffian duct includes surrounding region cDNA, RIKEN full-length enriched library, clone:6720421K10 product:protein phosphatase 3, catalytic subunit, beta isoform, full insert sequence. [AK135203]	GO:0010468|GO:0034097|GO:0004722|GO:0005515|GO:0046982|GO:0005626|GO:0005516|GO:0043234|GO:0030217|GO:0007507|GO:0043029|GO:0016787|GO:0046872|GO:0004721|GO:0001915|GO:0004723|GO:0005625|GO:0006470		Mm.274432	19056		TC1677466
A_51_P109548	0.000172291	4.29333	down	224.284	109.358	2.60142	0.499329	222.468	225.585	224.798	88.9124	117.94	121.223	2.49677	2.51908	2.78842	0.252499	0.605885	0.639602	AK011095	chr10:58979654-58979595	2510042O18Rik	Mus musculus 13 days embryo liver cDNA, RIKEN full-length enriched library, clone:2510042O18 product:unclassifiable, full insert sequence. [AK011095]	GO:0008150|GO:0003674|GO:0005575			70311		TC1600607
A_52_P488092	4.88232e-07	2.71708	down	3163.86	2406.04	6.41425	4.97219	3263.36	3435.11	2793.11	2337.35	2462.38	2418.38	6.37146	6.4477	6.42358	4.96885	4.98981	4.95791	NM_001081006	chr2:20731876-20731935	Etl4	Mus musculus enhancer trap locus 4 (Etl4), transcript variant c, mRNA [NM_001081006]	GO:0007275|GO:0005737|GO:0048706	NM_001081006	Mm.237935	208618	ENSMUST00000114604	NP955525
A_51_P198434	0.000102839	2.38567	down	60022.5	51505.3	10.6464	9.39196	65772.3	67456.9	46838.4	50088.3	53467.8	50959.7	10.7045	10.7432	10.4913	9.39037	9.43036	9.35515	NM_001001892	chr17:34133114-34133055	H2-K1	Mus musculus histocompatibility 2, K1, K region (H2-K1), transcript variant 1, mRNA [NM_001001892]	GO:0019882|GO:0002474|GO:0016020|GO:0006955|GO:0042612|GO:0042742|GO:0042590|GO:0009897|GO:0016021|GO:0001916|GO:0042605	NM_001001892	Mm.422886	14972	ENSMUST00000025181	TC1668572
A_51_P490867	0.00212399	1.83242	down	1815.5	2055.05	5.61777	4.74402	1776.35	1777.35	1892.79	1946.81	2106.9	2111.45	5.49402	5.49707	5.86223	4.70508	4.76489	4.7621	NM_199016	chr17:44233407-44233348	Enpp4	Mus musculus ectonucleotide pyrophosphatase/phosphodiesterase 4 (Enpp4), mRNA [NM_199016]	GO:0016787|GO:0016020|GO:0008150|GO:0003674|GO:0008152|GO:0016021|GO:0005575|GO:0003824	NM_199016	Mm.255971	224794	ENSMUST00000143137	TC1688709
A_51_P369270	0.00626682	2.28154	down	40.4597	36.6206	0.116497	-1.07351	32.9524	46.0326	42.3941	39.0781	31.2645	39.5192	-0.25837	0.226143	0.381716	-0.933527	-1.30957	-0.977434	NM_172661	chr2:32079501-32079560	Bat2l	Mus musculus HLA-B associated transcript 2-like (Bat2l), transcript variant 2, mRNA [NM_172661]	GO:0008150|GO:0003674|GO:0005575	NM_172661	Mm.25504	227723	ENSMUST00000132459	TC1615228
A_52_P478790	0.00869581	2.37014	down	150.721	130.539	2.00891	0.763943	122.749	146.808	182.605	119.932	127.04	144.644	1.63888	1.89935	2.48851	0.684263	0.713116	0.894449		chr15:75711961-75711902		Q9ERK2_MOUSE (Q9ERK2) Neprilysin-like peptidase gamma, partial (4%) [TC1669512]						TC1669512
A_52_P604419	0.00145627	2.68249	down	189.566	145.991	2.35303	0.929456	172.573	182.972	213.155	144.358	143.04	150.576	2.13038	2.21703	2.71168	0.951688	0.884252	0.952427	AK077877	chr9:36539406-36539347	Stt3a	STT3, subunit of the oligosaccharyltransferase complex, homolog A (S. cerevisiae) Gene [Source:MGI Symbol;Acc:MGI:105124] [ENSMUST00000120381]	GO:0016020|GO:0005624|GO:0006486|GO:0016740|GO:0004579|GO:0016021|GO:0005783|GO:0004576		Mm.2863	16430	ENSMUST00000120381	TC1573857
A_51_P332652	4.19026e-06	2.36771	down	2082.58	1814.7	5.80866	4.56517	2313.67	2133.88	1800.2	1760.46	1814.99	1868.64	5.87529	5.76082	5.78986	4.55992	4.54972	4.58586	NM_172574	chr12:16995781-16995722	Pqlc3	Mus musculus PQ loop repeat containing (Pqlc3), transcript variant 1, mRNA [NM_172574]	GO:0016020|GO:0008150|GO:0003674|GO:0016021|GO:0005575	NM_172574	Mm.379451	217430	ENSMUST00000054536	TC1572652
A_52_P285257	0.00138709	2.23038	down	9141.25	8330.24	7.91731	6.76002	10406.3	10479	6538.53	7468.04	8936.34	8586.33	8.04448	8.05677	7.65068	6.6447	6.84945	6.78591	NM_017367	chr5:93611783-93611724	Ccni	Mus musculus cyclin I (Ccni), mRNA [NM_017367]	GO:0051726|GO:0016538	NM_017367	Mm.250419	12453	ENSMUST00000058550	TC1574182
A_51_P318410	0.00121331	2.2978	down	205.091	185.598	2.47134	1.27109	198.341	200.762	216.172	164.456	192.655	199.685	2.33115	2.3509	2.73196	1.13974	1.31386	1.35966	NM_172645	chr1:163747929-163747870	AI848100	Mus musculus expressed sequence AI848100 (AI848100), mRNA [NM_172645]	GO:0016020|GO:0008150|GO:0003674|GO:0016021|GO:0005575	NM_172645	Mm.170002	226551	ENSMUST00000048377	TC1581174
A_51_P142295	5.2284e-05	3.63356	down	907.545	517.775	4.61484	2.75346	856.359	994.458	871.819	475.185	552.346	525.793	4.44139	4.65932	4.74381	2.67053	2.83341	2.75644	NM_178382	chr2:140484715-140484656	Flrt3	Mus musculus fibronectin leucine rich transmembrane protein 3 (Flrt3), transcript variant 2, mRNA [NM_178382]	GO:0016021	NM_178382	Mm.426781	71436	ENSMUST00000110057	TC1575859
A_51_P397983	1.25485e-05	3.81529	down	25683.4	13947.7	9.4374	7.50561	25675.5	27848.2	23526.6	13725.7	14990	13127.3	9.34742	9.46686	9.49793	7.52278	7.59569	7.39837	AK077026	chr1:40826028-40826087	Slc9a2	solute carrier family 9 (sodium/hydrogen exchanger), member 2 Gene [Source:MGI Symbol;Acc:MGI:105075] [ENSMUST00000027231]	GO:0015297|GO:0015385|GO:0006814|GO:0006811|GO:0008104|GO:0006885|GO:0016021|GO:0006810|GO:0005903		Mm.256414	226999	ENSMUST00000027231
A_51_P332392	0.000583431	2.44866	down	1010.45	854.817	4.77141	3.47942	1033.96	944.065	1053.31	854.28	869.519	840.653	4.71329	4.5843	5.01665	3.51675	3.48805	3.43345	NM_027250	chr4:108011274-108011333	2010305A19Rik	Mus musculus RIKEN cDNA 2010305A19 gene (2010305A19Rik), mRNA [NM_027250]	GO:0008150|GO:0003674|GO:0005488|GO:0005575	NM_027250	Mm.28354	69893	ENSMUST00000131656	TC1578175
A_52_P58524	0.000391083	2.39711	down	25544.7	21883.1	9.41543	8.15413	27450.8	28987.4	20196	23854.5	21656.2	20138.8	9.44388	9.5247	9.27771	8.32016	8.12647	8.01577	NM_010893	chr17:35072105-35072164	Neu1	Mus musculus neuraminidase 1 (Neu1), mRNA [NM_010893]	GO:0005764|GO:0031410|GO:0005515|GO:0016787|GO:0016020|GO:0016798|GO:0008152|GO:0005886|GO:0004308	NM_010893	Mm.8856	18010	ENSMUST00000007253	TC1572949
A_51_P499854	0.00030361	3.72085	down	1797.09	974.309	5.56299	3.66736	2220.04	1920.51	1250.7	924.605	996.312	1002.01	5.81569	5.60883	5.26444	3.63088	3.68443	3.68677	NM_010284	chr15:3268166-3268107	Ghr	Mus musculus growth hormone receptor (Ghr), transcript variant 1, mRNA [NM_010284]	GO:0006573|GO:0050731|GO:0004896|GO:0046427|GO:0006105|GO:0006897|GO:0005886|GO:0019903|GO:0043025|GO:0019898|GO:0006549|GO:0006600|GO:0019901|GO:0040014|GO:0004903|GO:0005634|GO:0016020|GO:0006103|GO:0006631|GO:0019530|GO:0060396|GO:0000255|GO:0016021|GO:0017046|GO:0046449|GO:0005576|GO:0005515|GO:0004872|GO:0042169|GO:0005615|GO:0005739|GO:0006101|GO:0006107|GO:0043526|GO:0009755|GO:0005737	NM_010284	Mm.3986	14600	ENSMUST00000069451	TC1596129
A_52_P260629	0.00101761	2.15082	down	1678.06	1624.35	5.50389	4.399	1602.37	1751.45	1680.35	1413.88	1681.63	1777.55	5.34531	5.4759	5.69048	4.24363	4.43962	4.51375	NM_027769	chr4:19446877-19446818	Cpne3	Mus musculus copine III (Cpne3), mRNA [NM_027769]	GO:0008150|GO:0003674|GO:0005575	NM_027769	Mm.38390	70568	ENSMUST00000029885	TC1635328
A_51_P242859	0.000529186	3.01216	down	6085.14	4184.08	7.36043	5.76963	5927.25	5705.5	6622.65	3951.65	4274.44	4326.16	7.23247	7.1797	7.66912	5.72642	5.7855	5.79695	NM_013777	chr13:4272257-4272198	Akr1c12	Mus musculus aldo-keto reductase family 1, member C12 (Akr1c12), mRNA [NM_013777]	GO:0004033|GO:0006805|GO:0005575	NM_013777	Mm.380356	622402	ENSMUST00000021632	TC1714772
A_51_P183373	0.00259521	1.67183	down	470.071	581.427	3.66399	2.92256	524.319	430.614	455.281	558.039	576.316	609.924	3.73362	3.45181	3.80654	2.90241	2.8947	2.97057	NM_024282	chr1:180180932-180180991	Pppde1	Mus musculus PPPDE peptidase domain containing 1 (Pppde1), mRNA [NM_024282]	GO:0008150|GO:0003674|GO:0005575	NM_024282	Mm.440132	78825	ENSMUST00000027783	TC1595193
A_51_P106859	3.03136e-05	1.86524	down	2951.06	3261.83	6.31091	5.41155	3299.04	3014.65	2539.5	3256.27	3261.65	3267.57	6.38715	6.25933	6.28625	5.44719	5.39536	5.39209	NM_138721	chr4:125775731-125775790	Lsm10	Mus musculus U7 snRNP-specific Sm-like protein LSM10 (Lsm10), transcript variant 1, mRNA [NM_138721]	GO:0071208|GO:0015030|GO:0005634|GO:0017069|GO:0008150|GO:0005683|GO:0008380|GO:0003723|GO:0030529|GO:0006397	NM_138721	Mm.41865	116748	ENSMUST00000055575	TC1578865
A_51_P184282	0.00700559	2.46928	down	7318.95	6120.85	7.61444	6.31035	6237.61	6920.37	8798.88	5171.31	6540.8	6650.43	7.3061	7.45819	8.07903	6.1145	6.39923	6.41732	U73445	chr12:32016814-32016753	Dld	Mus musculus dihydrolipoamide dehydrogenase (Dld) mRNA, complete cds. [U73445]	GO:0006120|GO:0048240|GO:0045254|GO:0004148|GO:0042391|GO:0005739|GO:0016491|GO:0043159|GO:0006508|GO:0051068|GO:0006103|GO:0019861|GO:0009106|GO:0005737|GO:0007369|GO:0051287|GO:0045454|GO:0045252|GO:0006086|GO:0043544|GO:0055114|GO:0050660		Mm.3131	13382
A_52_P442270	0.00388784	2.3411	down	34.4869	30.2276	-0.121945	-1.34913	28.4065	42.9557	32.0985	29.3496	27.059	34.2742	-0.472534	0.126337	-0.0196381	-1.34655	-1.51799	-1.18287	AK147232	chr17:17661701-17661642	Lnpep	Mus musculus cDNA, RIKEN full-length enriched library, clone:M5C1000C02 product:hypothetical protein, full insert sequence. [AK147232]	GO:0048169|GO:0005886|GO:0030147|GO:0043025|GO:0008233|GO:0030163|GO:0009725|GO:0006508|GO:0046872|GO:0016020|GO:0008270|GO:0008237|GO:0004177|GO:0016021|GO:0017046|GO:0032593|GO:0005792|GO:0043171|GO:0005515|GO:0009986|GO:0043229|GO:0010813|GO:0016787|GO:0005624|GO:0048471|GO:0005737|GO:0031982|GO:0001595		Mm.393452	240028		TC1750817
A_51_P474468	0.00413017	1.90457	down	3103.33	3385.57	6.38952	5.46005	3139.14	2872.17	3298.66	2987.39	3593.59	3575.75	6.31547	6.18949	6.66359	5.32285	5.53519	5.52211	NM_026031	chr4:124356145-124356086	Utp11l	Mus musculus UTP11-like, U3 small nucleolar ribonucleoprotein, (yeast) (Utp11l), mRNA [NM_026031]	GO:0050768|GO:0005634|GO:0005515|GO:0032040|GO:0005615|GO:0005737|GO:0006364	NM_026031	Mm.259121	67205	ENSMUST00000030738	TC1606304
A_52_P121	0.000497823	2.08735	down	797.283	791.641	4.42972	3.36805	754.04	842.873	794.938	757.146	801.681	816.097	4.25781	4.42073	4.61062	3.34261	3.37086	3.39068	NM_028091	chr1:53380049-53380108	Osgepl1	Mus musculus O-sialoglycoprotein endopeptidase-like 1 (Osgepl1), mRNA [NM_028091]	GO:0006508|GO:0016787|GO:0046872|GO:0008150|GO:0003674|GO:0004222|GO:0008270|GO:0008233|GO:0005739|GO:0008237|GO:0004175	NM_028091	Mm.212846	72085	ENSMUST00000027265	TC1705856
A_51_P224406	3.64733e-05	1.90919	down	10042.3	10888.6	8.08309	7.15013	10317.4	10646.4	9162.92	10985.5	10506	11174.3	8.03211	8.07964	8.13752	7.2015	7.08291	7.16598	NM_026441	chr4:129805118-129805177	Pef1	Mus musculus penta-EF hand domain containing 1 (Pef1), mRNA [NM_026441]	GO:0016020|GO:0008150|GO:0003674|GO:0005737|GO:0005575|GO:0005509	NM_026441	Mm.20818	67898	ENSMUST00000030563	TC1575618
A_51_P504127	0.00459113	1.77274	down	100.229	117.092	1.43729	0.611313	99.709	93.8273	107.15	114.807	120.201	116.268	1.33897	1.25349	1.71942	0.621258	0.633281	0.579399	NM_015809	chr7:149489728-149489787	Krtap5-4	Mus musculus keratin associated protein 5-4 (Krtap5-4), mRNA [NM_015809]	GO:0045095|GO:0005882|GO:0008150|GO:0003674|GO:0005575	NM_015809	Mm.389990	50775	ENSMUST00000061403	TC1713312
A_52_P200458	0.00241752	1.72687	down	1446.12	1733.77	5.28763	4.49948	1548.08	1336.31	1453.98	1703.71	1713.82	1783.77	5.29558	5.0856	5.48171	4.51265	4.46698	4.5188	NM_010242	chr9:14553283-14553224	Fut4	Mus musculus fucosyltransferase 4 (Fut4), mRNA [NM_010242]	GO:0016757|GO:0016020|GO:0008417|GO:0046920|GO:0006486|GO:0016740|GO:0009986|GO:0016021|GO:0005794	NM_010242	Mm.63450	14345		TC1585571
A_51_P432354	0.0131964	1.51713	down	630.223	863.283	4.09068	3.48934	594.343	638.164	658.162	769.459	911.493	908.895	3.91447	4.01934	4.33822	3.36589	3.55607	3.54605	NM_030057	chr12:60151360-60151301	Trappc6b	Mus musculus trafficking protein particle complex 6B (Trappc6b), mRNA [NM_030057]	GO:0016192|GO:0008150|GO:0003674|GO:0005575|GO:0006810|GO:0005783|GO:0005794	NM_030057	Mm.290070	78232	ENSMUST00000021380	TC1576524
A_52_P576778	0.000604213	2.33161	down	2874.26	2565.59	6.28116	5.05983	2855.32	2848.91	2918.55	2262.81	2751.75	2682.22	6.17875	6.17775	6.48696	4.92209	5.15011	5.10729	NM_133718	chr9:79618713-79618654	Tmem30a	Mus musculus transmembrane protein 30A (Tmem30a), mRNA [NM_133718]	GO:0016020|GO:0008150|GO:0003674|GO:0016021|GO:0005575	NM_133718	Mm.355034	69981	ENSMUST00000034878	TC1573593
A_51_P168395	0.0036508	3.20287	down	523.236	333.64	3.79986	2.1205	448.41	459.443	661.856	310.835	346.311	343.773	3.50799	3.5453	4.3463	2.05819	2.1599	2.1434	NM_030188	chr2:75817312-75817253	Ttc30a1	Mus musculus tetratricopeptide repeat domain 30A1 (Ttc30a1), mRNA [NM_030188]	GO:0005929|GO:0008150|GO:0003674|GO:0042995|GO:0030030|GO:0005488|GO:0005575	NM_030188	Mm.282339	78802	ENSMUST00000099994	TC1687123
A_52_P322544	0.00297932	1.64938	down	2379.61	2996.23	6.00815	5.28622	2456.72	2287.2	2394.9	2762.41	3217.07	3009.2	5.96183	5.86093	6.20168	5.2099	5.37551	5.27325	NM_198103	chr8:127417099-127417040	Exoc8	Mus musculus exocyst complex component 8 (Exoc8), mRNA [NM_198103]	GO:0005515|GO:0042995|GO:0015031|GO:0017160|GO:0000145|GO:0006887|GO:0005737|GO:0035091|GO:0006810	NM_198103	Mm.347360	102058		TC1580286
A_51_P427674	8.45762e-06	2.33474	down	11440.8	10135.1	8.2703	7.04704	12412.3	11531.6	10378.6	10079.1	10017.8	10308.4	8.2988	8.19486	8.31724	7.07726	7.01426	7.04961	NM_013495	chr19:3385374-3385433	Cpt1a	Mus musculus carnitine palmitoyltransferase 1a, liver (Cpt1a), nuclear gene encoding mitochondrial protein, mRNA [NM_013495]	GO:0005792|GO:0005741|GO:0005515|GO:0042755|GO:0005789|GO:0016740|GO:0042802|GO:0005739|GO:0046320|GO:0005743|GO:0006810|GO:0001676|GO:0050796|GO:0006629|GO:0051260|GO:0004095|GO:0006006|GO:0016020|GO:0008415|GO:0006631|GO:0032000|GO:0016021|GO:0006641	NM_013495	Mm.18522	12894		TC1574065
A_51_P381360	0.000292533	1.63814	down	55213.6	69820.7	10.5431	9.83102	57927.4	56395	51318.5	72101.2	69405.2	67955.8	10.5213	10.4848	10.6231	9.91592	9.80674	9.77039	NM_023312	chr8:72418161-72418102	Ndufa13	Mus musculus NADH dehydrogenase (ubiquinone) 1 alpha subcomplex, 13 (Ndufa13), nuclear gene encoding mitochondrial protein, mRNA [NM_023312]	GO:0005634|GO:0016020|GO:0005524|GO:0070469|GO:0005739|GO:0006915|GO:0022900|GO:0016021|GO:0006810|GO:0005743	NM_023312	Mm.21162	67184	ENSMUST00000110167	NP1392044
A_51_P155174	0.0319079	1.63665	down	603.207	757.706	4.01522	3.30448	638.254	492.397	678.968	782.514	774.013	716.591	4.0173	3.64524	4.38313	3.39016	3.32019	3.20309	NR_028331	chr11:58133366-58133307	Zfp672	Mus musculus zinc finger protein 672 (Zfp672), transcript variant 2, non-coding RNA [NR_028331]	GO:0003676|GO:0005634|GO:0046872|GO:0008150|GO:0006350|GO:0003674|GO:0003677|GO:0008270|GO:0005575|GO:0045449|GO:0005622	NR_028331	Mm.72124	319475	ENSMUST00000064786	TC1589273
A_51_P362328	0.00289032	2.05873	down	4007.67	4025.69	6.75654	5.71479	3602.4	4082.32	4338.3	3912.29	4111.94	4052.84	6.51406	6.69673	7.05884	5.71198	5.72958	5.7028	NM_026496	chr15:37293124-37293183	Grhl2	Mus musculus grainyhead-like 2 (Drosophila) (Grhl2), mRNA [NM_026496]	GO:0005634|GO:0003700|GO:0006350|GO:0003677|GO:0005575|GO:0045449	NM_026496	Mm.244612	252973	ENSMUST00000022895	TC1632148
A_52_P188261	0.00492071	2.00058	down	1168.81	1207.21	4.97794	3.97753	1106.64	1089.26	1310.51	1204.42	1201.03	1216.19	4.81129	4.7907	5.33184	4.01231	3.95404	3.96623	NM_001025439	chr3:126545798-126545857	Camk2d	Mus musculus calcium/calmodulin-dependent protein kinase II, delta (Camk2d), transcript variant 1, mRNA [NM_001025439]	GO:0006816|GO:0031594|GO:0004672|GO:0004683|GO:0030007|GO:0005524|GO:0016740|GO:0005516|GO:0010389|GO:0000166|GO:0005634|GO:0046777|GO:0004674|GO:0005829|GO:0001666|GO:0016301|GO:0000082|GO:0006468|GO:0005737|GO:0030315|GO:0060048|GO:0008284|GO:0005954	NM_001025439	Mm.255822	108058	ENSMUST00000106401	NP805339
A_52_P262219	0.0668756	2.52686	down	6817.31	5119.21	7.39351	6.05617	3439.61	6892.36	10120	4544.87	5638.72	5174.04	6.44735	7.45234	8.28084	5.92821	6.18513	6.05516	NM_010234	chr12:86817900-86817959	Fos	Mus musculus FBJ osteosarcoma oncogene (Fos), mRNA [NM_010234]	GO:0007399|GO:0003700|GO:0046982|GO:0045944|GO:0051789|GO:0046983|GO:0003690|GO:0006355|GO:0006366|GO:0031668|GO:0042493|GO:0005634|GO:0005667|GO:0043565|GO:0005624|GO:0003677|GO:0019717	NM_010234	Mm.246513	14281	ENSMUST00000021674	TC1576067
A_52_P39157	0.00339625	2.36029	down	701.831	615.996	4.24028	3.00131	696.537	620.102	788.854	541.327	652.729	653.933	4.14337	3.97792	4.59954	2.85854	3.07432	3.07108	NM_007552	chr2:18607987-18608046	Bmi1	Mus musculus Bmi1 polycomb ring finger oncogene (Bmi1), mRNA [NM_007552]	GO:0006350|GO:0009987|GO:0043066|GO:0016604|GO:0016573|GO:0048103|GO:0045449|GO:0001501|GO:0016574|GO:0005634|GO:0046872|GO:0016568|GO:0004842|GO:0021903|GO:0031519|GO:0008270|GO:0005515|GO:0001701|GO:0007420|GO:0048704|GO:0005737|GO:0003682|GO:0048706|GO:0006959|GO:0000151|GO:0000122|GO:0016564	NM_007552	Mm.289584	12151	ENSMUST00000028071	TC1574389
A_51_P336480	0.00384679	2.29346	down	131.968	120.031	1.83281	0.63528	119.542	140.939	135.422	142.557	108.276	109.261	1.60069	1.84048	2.05725	0.933579	0.482545	0.489716	AK029978	chr12:86426943-86426884	Prox2	prospero homeobox 2 Gene [Source:MGI Symbol;Acc:MGI:1920672] [ENSMUST00000110249]	GO:0030528|GO:0005634|GO:0006350|GO:0007275|GO:0003677|GO:0045449		Mm.477070	73422	ENSMUST00000110249	TC1602568
A_51_P502798	0.000446881	2.50998	down	116.237	94.5478	1.62934	0.301667	143.975	112.315	92.4207	91.3423	91.8368	100.464	1.86899	1.51296	1.50607	0.291397	0.24498	0.368623	NM_172921	chr9:48207362-48207421	Fam55d	Mus musculus family with sequence similarity 55, member D (Fam55d), mRNA [NM_172921]	GO:0005576|GO:0008150|GO:0003674|GO:0005575	NM_172921	Mm.325522	244853	ENSMUST00000093853	TC1589152
A_52_P120037	0.0578409	2.2704	down	16942.7	14518.5	8.74844	7.56549	10991.7	14308.8	25527.8	14822.3	14240.3	14492.7	8.12344	8.50617	9.61571	7.63367	7.52167	7.54113	NM_010128	chr6:135332885-135332944	Emp1	Mus musculus epithelial membrane protein 1 (Emp1), mRNA [NM_010128]	GO:0016020|GO:0005886|GO:0016021|GO:0016049	NM_010128	Mm.182785	13730	ENSMUST00000111907	TC1682741
A_51_P383544	0.000480693	2.80677	down	67.9162	50.1168	0.873877	-0.615031	61.6138	74.0734	68.0613	53.2866	46.4065	50.6574	0.6445	0.912441	1.06469	-0.486112	-0.739767	-0.619215	AK041224	chr6:129534979-129535038	Klre1	Mus musculus adult male aorta and vein cDNA, RIKEN full-length enriched library, clone:A530092N20 product:unclassifiable, full insert sequence. [AK041224]	GO:0045954|GO:0045233|GO:0005887|GO:0004872|GO:0004888|GO:0032729|GO:0005529|GO:0019903|GO:0030101|GO:0009897|GO:0002223|GO:0046983		Mm.30968	243655		TC1612575
A_51_P324742	0.000207511	3.39646	down	83.167	50.6392	1.1662	-0.597833	74.8585	89.3976	85.2449	50.9531	49.8101	51.1544	0.925411	1.18372	1.38947	-0.550717	-0.637653	-0.605129	NM_027063	chr4:137011176-137011235	1700013G24Rik	Mus musculus RIKEN cDNA 1700013G24 gene (1700013G24Rik), mRNA [NM_027063]	GO:0008150|GO:0003674|GO:0005575	NM_027063	Mm.272519	69380	ENSMUST00000048893	TC1585997
A_51_P378858	6.68508e-05	2.65041	down	148.746	116.2	2.00028	0.594063	160.706	159.21	126.323	101.218	121.224	126.157	2.02759	2.01635	1.9569	0.439512	0.645512	0.697165	NM_025770	chr13:91075089-91075030	Atg10	Mus musculus autophagy-related 10 (yeast) (Atg10), mRNA [NM_025770]	GO:0005515|GO:0031401|GO:0006914|GO:0015031|GO:0006497|GO:0005737|GO:0005575|GO:0006810	NM_025770	Mm.235385	66795	ENSMUST00000022119	TC1584961
A_51_P118237	0.00190292	2.4797	down	11814.7	9813.26	8.30729	6.99712	13726.1	9839.5	11878.5	9012.36	9747.46	10680	8.44395	7.96593	8.51199	6.91588	6.97479	7.1007	NM_011361	chr10:21719390-21719449	Sgk1	Mus musculus serum/glucocorticoid regulated kinase 1 (Sgk1), transcript variant 6, mRNA [NM_011361]	GO:0004672|GO:0048812|GO:0051726|GO:0005524|GO:0043066|GO:0031115|GO:0000166|GO:0007019|GO:0005634|GO:0048156|GO:0006468|GO:0016301|GO:0050775|GO:0008542|GO:0043402|GO:0005515|GO:0006950|GO:0016740|GO:0030307|GO:0007616|GO:0032880|GO:0010765|GO:0043423|GO:0006974|GO:0032869|GO:0004674|GO:0043005|GO:0048471|GO:0018105|GO:0048037|GO:0005737|GO:0006883|GO:0006915|GO:0005783	NM_011361	Mm.28405	20393	ENSMUST00000092673	TC1585076
A_52_P40367	1.16636e-05	2.09925	down	2042.2	2008.76	5.78006	4.71019	2168.37	2212.99	1745.24	1864.28	2055.47	2106.54	5.78171	5.81334	5.74514	4.64259	4.72923	4.75874	NM_026065	chr10:94963124-94963065	Mrpl42	Mus musculus mitochondrial ribosomal protein L42 (Mrpl42), nuclear gene encoding mitochondrial protein, mRNA [NM_026065]	GO:0008150|GO:0003674|GO:0005739	NM_026065	Mm.30008	67270	ENSMUST00000075829	TC1702508
A_51_P390508	0.00192497	1.97818	down	1344.17	1396.8	5.16865	4.18448	1219.52	1635.36	1177.62	1285.06	1523.39	1381.96	4.95141	5.37695	5.17758	4.10581	4.29705	4.15059	NM_008586	chr18:21253554-21254638	Mep1b	Mus musculus meprin 1 beta (Mep1b), mRNA [NM_008586]	GO:0006508|GO:0016787|GO:0046872|GO:0016020|GO:0005624|GO:0004222|GO:0008270|GO:0008233|GO:0008237|GO:0016021	NM_008586	Mm.2682	17288	ENSMUST00000082235	TC1581159
A_52_P679434	0.0129307	1.78321	down	28.3626	32.8186	-0.389313	-1.22379	27.7504	25.1426	32.195	33.7283	32.0621	32.6652	-0.506247	-0.646381	-0.0153103	-1.14592	-1.27322	-1.25223	NM_080793	chr3:51324640-51324581	Setd7	Mus musculus SET domain containing (lysine methyltransferase) 7 (Setd7), mRNA [NM_080793]	GO:0005634|GO:0006350|GO:0016568|GO:0016740|GO:0008168|GO:0018024|GO:0005694|GO:0006355|GO:0045449	NM_080793	Mm.192111	73251	ENSMUST00000037141	TC1579233
A_52_P279294	0.0778702	3.37736	down	186.888	88.75	1.96567	0.209771	247.558	267.728	45.3792	84.3948	86.5728	95.2825	2.65094	2.76618	0.479884	0.177268	0.159822	0.292223	NM_029823	chrX:132529484-132529543	2900062L11Rik	Mus musculus RIKEN cDNA 2900062L11 gene (2900062L11Rik), mRNA [NM_029823]	GO:0008150|GO:0003674|GO:0005575	NM_029823	Mm.328305	76976	ENSMUST00000058119	TC1677001
A_51_P465023	0.0035385	1.5585	down	12397.4	16542.1	8.38996	7.74981	12364.3	12539.6	12288.2	14806.5	17448.2	17371.4	8.29321	8.31577	8.56091	7.63213	7.81477	7.80251	NM_009790	chr12:101445079-101445138	Calm1	Mus musculus calmodulin 1 (Calm1), mRNA [NM_009790]	GO:0005515|GO:0043388|GO:0005856|GO:0005737|GO:0007049|GO:0005509	NM_009790	Mm.285993	12313	ENSMUST00000110082	TC1573669
A_51_P500507	0.00144775	2.80671	down	568.545	421.379	3.93948	2.4506	537.296	539.575	628.763	360.508	437.172	466.456	3.76889	3.77724	4.2723	2.27207	2.49604	2.58368	NM_025698	chr18:46747436-46747377	Tmed7	Mus musculus transmembrane emp24 protein transport domain containing 7 (Tmed7), mRNA [NM_025698]	GO:0008150|GO:0003674|GO:0005575	NM_025698	Mm.296043	66676	ENSMUST00000036030	TC1600399
A_51_P303906	0.00684635	2.02034	down	10732	10988.6	8.17489	7.16029	9743.18	10225.3	12227.4	9932.31	11638.7	11394.7	7.94949	8.02142	8.55376	7.0561	7.23062	7.19416	NM_146243	chr11:19962449-19962390	Actr2	Mus musculus ARP2 actin-related protein 2 homolog (yeast) (Actr2), mRNA [NM_146243]	GO:0005515|GO:0008150|GO:0003674|GO:0042995|GO:0005524|GO:0005856|GO:0005737|GO:0003779|GO:0000166|GO:0005575	NM_146243	Mm.259045	66713	ENSMUST00000000137	TC1571849
A_52_P20211	0.0356138	1.65309	down	436.89	561.074	3.56264	2.83748	454.282	419.802	436.585	398.023	638.192	647.008	3.52676	3.41512	3.74604	2.41489	3.04183	3.05572		chr15:79908571-79908512		RRRPL3 ribosomal protein L3 {Rattus rattus} (exp=-1; wgp=0; cg=0), partial (30%) [TC1665419]						TC1665419
A_52_P1415	0.00301167	2.3727	down	140.247	121.869	1.91304	0.666506	116.654	154.797	149.29	116.41	132.693	116.506	1.56541	1.9758	2.1979	0.641254	0.775924	0.582339		chr19:17129243-17129302		Q7TS76_MOUSE (Q7TS76) Sip1 protein, partial (25%) [TC1643988]						TC1643988
A_51_P270997	0.0218516	1.70937	down	33.7994	40.6977	-0.142206	-0.915672	27.573	37.7184	36.1069	44.1523	39.5266	38.4141	-0.515499	-0.0612459	0.150127	-0.757396	-0.971269	-1.01835	NM_018741	chr4:45822862-45822803	Igfbpl1	Mus musculus insulin-like growth factor binding protein-like 1 (Igfbpl1), mRNA [NM_018741]	GO:0005576|GO:0008150|GO:0005520|GO:0003674|GO:0005575|GO:0001558	NM_018741	Mm.3919	75426	ENSMUST00000044297	TC1581435
A_51_P244540	0.0297089	2.58076	down	53.793	40.8239	0.457514	-0.910279	30.7418	69.2482	61.3889	42.1679	38.0515	42.2523	-0.358552	0.815263	0.915832	-0.823742	-1.02614	-0.880958	NM_008747	chr12:16666543-16666601	Ntsr2	Mus musculus neurotensin receptor 2 (Ntsr2), mRNA [NM_008747]	GO:0004872|GO:0016020|GO:0004930|GO:0005886|GO:0016492|GO:0007186|GO:0042391|GO:0004871|GO:0016021|GO:0007165|GO:0007200	NM_008747	Mm.281715	18217	ENSMUST00000020910	TC1643446
A_52_P134988	9.46602e-06	2.35738	down	964.385	844.77	4.69823	3.46105	991.186	1067.09	834.879	799.169	843.355	891.788	4.65233	4.76102	4.68135	3.42054	3.44398	3.51864	NM_028298	chr5:146007760-146007819	Zfp655	Mus musculus zinc finger protein 655 (Zfp655), transcript variant 1, mRNA [NM_028298]	GO:0008150|GO:0003674|GO:0005575	NM_028298	Mm.206555	72611	ENSMUST00000031604	NP1258354
A_51_P286034	0.00278419	1.79261	down	316.427	360.497	3.07205	2.22999	327.536	381.526	240.219	329.64	357.092	394.76	3.05483	3.27719	2.88414	2.14293	2.20413	2.34292	NM_134033	chr11:5429370-5429311	Ccdc117	Mus musculus coiled-coil domain containing 117 (Ccdc117), mRNA [NM_134033]	GO:0008150|GO:0003674|GO:0005575	NM_134033	Mm.210403	104479	ENSMUST00000020776	TC1575528
A_52_P186937	0.0113201	2.25692	down	611.29	554.112	4.027	2.85265	579.675	500.545	753.649	542.657	589.085	530.595	3.87842	3.66891	4.53368	2.86208	2.92631	2.76955	NM_020557	chr12:27164119-27164178	Cmpk2	Mus musculus cytidine monophosphate (UMP-CMP) kinase 2, mitochondrial (Cmpk2), nuclear gene encoding mitochondrial protein, mRNA [NM_020557]	GO:0005524|GO:0016740|GO:0004127|GO:0016301|GO:0006221|GO:0005739|GO:0000166	NM_020557	Mm.271839	22169	ENSMUST00000020969	TC1577593
A_51_P470630	0.0230861	2.98334	down	69.9455	46.0368	0.836803	-0.740126	69.4865	42.1415	98.2087	45.1473	51.1086	41.8545	0.817978	0.0987263	1.59371	-0.725247	-0.600526	-0.894604	NM_029809	chr7:13516229-13516288	2310014L17Rik	Mus musculus RIKEN cDNA 2310014L17 gene (2310014L17Rik), mRNA [NM_029809]	GO:0046872|GO:0008150|GO:0003674|GO:0005575	NM_029809	Mm.439896	381845	ENSMUST00000045870	TC1584415
A_52_P357469	0.000601069	3.07959	down	460.422	311.991	3.63813	2.01539	448.42	448.55	484.296	261.556	339.324	335.094	3.50802	3.51068	3.89567	1.80916	2.1305	2.1065	NM_010237	chr10:34329057-34329116	Frk	Mus musculus fyn-related kinase (Frk), transcript variant 2, mRNA [NM_010237]	GO:0004672|GO:0005515|GO:0004713|GO:0005886|GO:0004715|GO:0005524|GO:0016740|GO:0016301|GO:0006468|GO:0005737|GO:0000166|GO:0005622	NM_010237	Mm.332432	14302	ENSMUST00000019913	TC1581073
A_51_P283236	0.00503612	1.9483	down	33.9934	36.1855	-0.128973	-1.09119	29.6941	38.6783	33.6077	32.8109	33.8827	41.8628	-0.408578	-0.0249877	0.0466461	-1.18571	-1.19354	-0.89432	NM_178659	chr11:59271374-59271433	Jmjd4	Mus musculus jumonji domain containing 4 (Jmjd4), mRNA [NM_178659]	GO:0008150|GO:0003674|GO:0005575	NM_178659	Mm.295954	194952	ENSMUST00000108777	TC1580009
A_52_P256421	0.00372577	1.54581	down	940.668	1247.21	4.65119	4.02282	1014.16	1069.8	738.042	1331.81	1223.97	1185.84	4.68539	4.76469	4.50349	4.15736	3.98133	3.92978		chr1:153568587-153568646	Fam129a	family with sequence similarity 129, member A Gene [Source:MGI Symbol;Acc:MGI:2137237] [ENSMUST00000148810]	GO:0001934|GO:0006417|GO:0003674|GO:0045727|GO:0034976|GO:0006950|GO:0001933|GO:0005737|GO:0005575			63913	ENSMUST00000148810	TC1695990
A_51_P267346	1.2399e-05	2.68037	down	2222.19	1718.85	5.90772	4.48529	2261.14	2351.57	2053.86	1594.46	1804.63	1757.46	5.84215	5.90097	5.98005	4.41704	4.54147	4.49736	NM_134097	chr4:40206892-40206833	Topors	Mus musculus topoisomerase I binding, arginine/serine-rich (Topors), mRNA [NM_134097]	GO:0042127|GO:0006974|GO:0005634|GO:0005515|GO:0046872|GO:0045941|GO:0016853|GO:0008270|GO:0006915|GO:0016874	NM_134097	Mm.251548	106021	ENSMUST00000042575	TC1574918
A_51_P118188	0.023917	2.48873	down	60.3454	50.54	0.664918	-0.650492	46.1085	81.2008	53.7267	56.9215	33.2893	61.4094	0.226279	1.04498	0.723495	-0.390914	-1.21903	-0.341529	NM_207222	chr6:138313526-138313467	Lmo3	Mus musculus LIM domain only 3 (Lmo3), mRNA [NM_207222]	GO:0046872|GO:0006350|GO:0008270|GO:0045449	NM_207222	Mm.478949	109593	ENSMUST00000067437	TC1587424
A_51_P312916	1.31298e-05	6.442	down	107.202	34.2177	1.522	-1.16551	102.352	128.01	91.2456	31.6731	36.2455	34.7346	1.37671	1.70167	1.48761	-1.23663	-1.09629	-1.16361	BF464414			BF464414 UI-M-CG0p-boh-b-07-0-UI.s1 NIH_BMAP_Ret4_S2 Mus musculus cDNA clone UI-M-CG0p-boh-b-07-0-UI 3', mRNA sequence [BF464414]
A_51_P268687	0.00148595	3.97833	down	168.548	87.5172	2.17271	0.180547	133.942	187.711	183.991	96.3697	72.7884	93.3933	1.76478	2.25393	2.49942	0.368694	-0.090384	0.263331	NM_008560	chr18:68567353-68567294	Mc2r	Mus musculus melanocortin 2 receptor (Mc2r), mRNA [NM_008560]	GO:0004872|GO:0016020|GO:0004930|GO:0005886|GO:0004978|GO:0007186|GO:0004871|GO:0004977|GO:0016021|GO:0007165	NM_008560	Mm.426053	17200	ENSMUST00000052347	TC1587117
A_51_P445662	0.000135999	2.07525	down	6713.31	6707.3	7.50459	6.45131	6922.35	6721.73	6495.86	6668.1	6564.17	6889.63	7.45636	7.41617	7.64123	6.48125	6.40438	6.46829	NM_008292	chr18:50355686-50355745	Hsd17b4	Mus musculus hydroxysteroid (17-beta) dehydrogenase 4 (Hsd17b4), mRNA [NM_008292]	GO:0032934|GO:0005777|GO:0005488|GO:0005739|GO:0016853|GO:0016491|GO:0060009|GO:0003824|GO:0003857|GO:0006629|GO:0016829|GO:0006631|GO:0008152|GO:0033989|GO:0006635|GO:0000038|GO:0055114	NM_008292	Mm.277857	15488	ENSMUST00000025385	TC1573583
A_52_P131672	0.000284868	2.14689	down	3879.13	3747.95	6.71354	5.61129	3977.73	3848.66	3810.98	3865.22	3593.48	3785.14	6.65705	6.6117	6.87187	5.69452	5.53515	5.60421	NM_144948	chr9:48297494-48297435	Rbm7	Mus musculus RNA binding motif protein 7 (Rbm7), mRNA [NM_144948]	GO:0003676|GO:0008150|GO:0003674|GO:0007126|GO:0003723|GO:0000166|GO:0005575	NM_144948	Mm.76911	67010	ENSMUST00000048956	TC1599593
A_51_P291388	0.00298378	1.57705	down	5962.2	7837.24	7.33316	6.67593	5736.13	6203.69	5946.79	7954.01	7617.75	7939.95	7.18518	7.30047	7.51382	6.73565	6.61913	6.673	U95116	chr11:74487742-74487683	Pafah1b1	Mus musculus lissencephaly-1 protein (LIS-1) mRNA, complete cds. [U95116]	GO:0005875|GO:0021819|GO:0007067|GO:0030036|GO:0043025|GO:0031512|GO:0019226|GO:0051301|GO:0051219|GO:0006810|GO:0021766|GO:0005634|GO:0016020|GO:0001764|GO:0031252|GO:0015630|GO:0001675|GO:0016477|GO:0007275|GO:0005626|GO:0005874|GO:0017145|GO:0007049|GO:0007611|GO:0005737|GO:0005813|GO:0050885|GO:0007399|GO:0031513|GO:0032319|GO:0030154|GO:0000226|GO:0008344|GO:0030426|GO:0016042|GO:0005635|GO:…		Mm.397111	18472
A_51_P513719	1.01188e-05	2.24404	down	1686.11	1548.74	5.50293	4.33683	1864.49	1757.88	1435.95	1565.34	1518.75	1562.14	5.56388	5.48118	5.46372	4.39044	4.29265	4.32739	NM_007671	chr4:109333838-109333779	Cdkn2c	Mus musculus cyclin-dependent kinase inhibitor 2C (p18, inhibits CDK4) (Cdkn2c), mRNA [NM_007671]	GO:0007049|GO:0008285	NM_007671	Mm.1912	12580	ENSMUST00000097921	TC1596499
A_52_P239726	0.0115854	2.31041	down	673.324	598.42	4.16663	2.95848	580.852	599.283	839.836	521.642	618.83	654.787	3.88134	3.92865	4.68989	2.8051	2.99738	3.07297	NM_001080948	chr15:99844406-99844465	Larp4	Mus musculus La ribonucleoprotein domain family, member 4 (Larp4), transcript variant 2, mRNA [NM_001080948]	GO:0003676|GO:0008150|GO:0003674|GO:0003723|GO:0005575	NM_001080948	Mm.476896	207214	ENSMUST00000100206	TC1682618
A_52_P325527	0.0171426	2.6061	down	133.441	99.7651	1.7597	0.377801	202.668	88.9842	108.671	108.271	97.4124	93.612	2.36229	1.17704	1.73976	0.536685	0.330013	0.266706	NM_010103	chr13:89461799-89461858	Edil3	Mus musculus EGF-like repeats and discoidin I-like domains 3 (Edil3), transcript variant 2, mRNA [NM_010103]	GO:0005576|GO:0005515|GO:0010811|GO:0007155|GO:0007275|GO:0005509	NM_010103	Mm.125580	13612	ENSMUST00000081769
A_51_P242345	2.34804e-05	2.23139	down	5658.53	5254.39	7.25698	6.09904	5947.43	5704.03	5324.12	5091.14	5346.71	5325.32	7.23737	7.17932	7.35425	6.09196	6.10841	6.09674	NM_146193	chr7:88937164-88937105	Btbd1	Mus musculus BTB (POZ) domain containing 1 (Btbd1), mRNA [NM_146193]	GO:0005515|GO:0008150|GO:0003674|GO:0005737|GO:0005575	NM_146193	Mm.439893	83962		TC1574470
A_51_P144825	1.48578e-05	1.66942	down	7070.6	8750.75	7.57361	6.83426	7664.17	7374.79	6172.84	8346.83	9151.53	8753.9	7.60323	7.54994	7.56765	6.8052	6.88378	6.81379	NM_009906	chr7:112894785-112894726	Tpp1	Mus musculus tripeptidyl peptidase I (Tpp1), mRNA [NM_009906]	GO:0043171|GO:0007399|GO:0045453|GO:0004252|GO:0005515|GO:0042277|GO:0008236|GO:0008240|GO:0007040|GO:0005739|GO:0008233|GO:0004175|GO:0005764|GO:0006508|GO:0016787|GO:0050885|GO:0005625	NM_009906	Mm.20837	12751	ENSMUST00000033184	TC1587443
A_51_P125260	1.22212e-05	2.44347	down	19344.9	16331	9.02391	7.73498	21211.8	20239	16583.9	16835.9	15859.8	16297.4	9.0719	9.00641	8.99342	7.81744	7.67707	7.71044	NM_177470	chr18:74965691-74965750	Acaa2	Mus musculus acetyl-Coenzyme A acyltransferase 2 (mitochondrial 3-oxoacyl-Coenzyme A thiolase) (Acaa2), nuclear gene encoding mitochondrial protein, mRNA [NM_177470]	GO:0006629|GO:0003988|GO:0008150|GO:0003674|GO:0008415|GO:0008152|GO:0006631|GO:0016747|GO:0016740|GO:0005739|GO:0003824|GO:0005743	NM_177470	Mm.245724	52538	ENSMUST00000041053	TC1778763
A_52_P572447	0.073062	1.77865	down	1364.1	1541.26	5.15986	4.32908	1186.9	1043.55	1861.84	1465.24	1583.11	1575.43	4.91231	4.72884	5.83844	4.29511	4.35253	4.33961	NM_026792	chr8:18881794-18881853	Agpat5	Mus musculus 1-acylglycerol-3-phosphate O-acyltransferase 5 (lysophosphatidic acid acyltransferase, epsilon) (Agpat5), mRNA [NM_026792]	GO:0016020|GO:0008415|GO:0008152|GO:0016740|GO:0006639|GO:0005739|GO:0016021|GO:0003841|GO:0008654	NM_026792	Mm.24117	52123	ENSMUST00000033847	TC1575334
A_52_P434052	0.00134521	1.83131	down	398.996	453.474	3.42793	2.55505	401.792	436.195	359	380.635	489.929	489.857	3.34962	3.47039	3.46377	2.35045	2.66041	2.6543	NM_001039388	chr13:8802681-8802622	Wdr37	Mus musculus WD repeat domain 37 (Wdr37), transcript variant 2, mRNA [NM_001039388]	GO:0008150|GO:0003674|GO:0005575	NM_001039388	Mm.284654	207615	ENSMUST00000054251	TC1601481
A_52_P157274	0.00340813	2.21146	down	853.044	811.206	4.52851	3.3835	832.74	870.245	856.145	626.826	910.374	896.419	4.40104	4.46684	4.71764	3.07011	3.5543	3.52611	NM_001077190	chr2:22797509-22797450	Abi1	Mus musculus abl-interactor 1 (Abi1), transcript variant 1, mRNA [NM_001077190]	GO:0005515|GO:0009987|GO:0030027|GO:0030296|GO:0005634|GO:0042995|GO:0030054|GO:0031252|GO:0045202|GO:0005737|GO:0005856|GO:0019717|GO:0001756|GO:0005622|GO:0018108	NM_001077190	Mm.205647	11308	ENSMUST00000093171	NP1257705
A_51_P224872	4.85115e-06	2.64741	down	5563.94	4332.54	7.22454	5.81995	5956.17	6051.63	4684.02	4158.02	4566.97	4272.63	7.23949	7.26467	7.16946	5.79987	5.881	5.77899	NM_001005510	chr12:77211825-77211884	Syne2	Mus musculus synaptic nuclear envelope 2 (Syne2), mRNA [NM_001005510]	GO:0006998|GO:0030018|GO:0005886|GO:0034504|GO:0007163|GO:0005739|GO:0005640|GO:0016529|GO:0005634|GO:0030016|GO:0003674|GO:0005635|GO:0010761|GO:0016020|GO:0005737|GO:0005856|GO:0003779|GO:0016021	NM_001005510	Mm.26652	319565	ENSMUST00000044217	TC1597023
A_52_P640355	3.88506e-07	1.55453	down	29690.8	39471.2	9.64467	9.00819	31767.6	31127.3	26177.6	38166.4	39951.1	40296.2	9.65459	9.62745	9.65197	8.9982	9.00993	9.01644	NM_027862	chr11:115277193-115277134	Atp5h	Mus musculus ATP synthase, H+ transporting, mitochondrial F0 complex, subunit d (Atp5h), nuclear gene encoding mitochondrial protein, mRNA [NM_027862]	GO:0016020|GO:0008150|GO:0003674|GO:0006811|GO:0000276|GO:0015078|GO:0005739|GO:0045263|GO:0015992|GO:0006810|GO:0005743|GO:0015986	NM_027862	Mm.371641	71679	ENSMUST00000137754	TC1736903
A_51_P415870	0.00206796	2.08832	down	137.588	136.785	1.89441	0.832067	127.68	139.994	145.091	126.897	132.943	150.516	1.6957	1.83078	2.15674	0.7657	0.778645	0.951857		chr1:80261948-80261889		AF052147 cul-3 {Homo sapiens} (exp=-1; wgp=0; cg=0), partial (27%) [TC1620610]						TC1620610
A_51_P303433	0.000521245	2.66751	down	1689.81	1314.28	5.51224	4.09674	1779.71	1547.94	1741.77	1190.76	1396.44	1355.65	5.49674	5.29769	5.74227	3.99586	4.17151	4.12285	NM_172540	chrX:130757767-130757708	Trmt2b	Mus musculus TRM2 tRNA methyltransferase 2 homolog B (S. cerevisiae) (Trmt2b), transcript variant 2, mRNA [NM_172540]	GO:0008150|GO:0003674|GO:0005739	NM_172540	Mm.289368	215201	ENSMUST00000113252	TC1602176
A_51_P490955	9.15673e-06	2.21029	down	360.061	336.978	3.28062	2.13639	363.591	389.717	326.875	331.503	334.488	344.944	3.20549	3.30784	3.32852	2.15106	2.10979	2.1483	NM_001039532	chr7:4986174-4986115	Zfp784	Mus musculus zinc finger protein 784 (Zfp784), mRNA [NM_001039532]	GO:0003676|GO:0005634|GO:0046872|GO:0008150|GO:0006350|GO:0003674|GO:0003677|GO:0008270|GO:0005575|GO:0045449|GO:0005622	NM_001039532	Mm.333548	654801	ENSMUST00000062428	TC1582198
A_51_P289828	0.0614334	2.34044	down	70.523	59.0441	0.834933	-0.391846	46.3805	57.1894	107.999	47.24	65.3781	64.5141	0.234764	0.539235	1.7308	-0.659878	-0.245285	-0.270374	NM_001162956	chr10:58038802-58038861	Ccdc138	Mus musculus coiled-coil domain containing 138 (Ccdc138), mRNA [NM_001162956]	GO:0008150|GO:0003674|GO:0005575	NM_001162956	Mm.211744	76138		TC1603388
A_52_P1187714	9.9084e-05	6.04557	down	204.79	68.7437	2.43593	-0.159953	211.955	253.706	148.709	73.9799	69.3526	62.8985	2.42693	2.68857	2.19227	-0.0127525	-0.160143	-0.306963	AK032928	chr6:15297023-15297082		Mus musculus 12 days embryo male wolffian duct includes surrounding region cDNA, RIKEN full-length enriched library, clone:6720474C16 product:unclassifiable, full insert sequence. [AK032928]						TC1620960
A_52_P213889	0.00308165	2.94997	down	655.137	454.727	4.12951	2.56881	662.979	525.197	777.235	447.4	454.627	462.153	4.07214	3.73827	4.57813	2.58361	2.55252	2.57031	NM_172476	chr7:125679571-125679512	Tmc7	Mus musculus transmembrane channel-like gene family 7 (Tmc7), mRNA [NM_172476]	GO:0016020|GO:0008150|GO:0003674|GO:0016021|GO:0005575	NM_172476	Mm.69380	209760	ENSMUST00000044195	TC1583229
A_52_P214678	0.00493262	1.6491	down	1475.75	1854.91	5.31874	4.59707	1457.06	1428.44	1541.77	1892.12	1830.6	1842.01	5.20816	5.18178	5.56629	4.66397	4.56208	4.56515	NM_019773	chrX:162895790-162895731	Rab9	Mus musculus RAB9, member RAS oncogene family (Rab9), mRNA [NM_019773]	GO:0005764|GO:0016020|GO:0008150|GO:0003674|GO:0015031|GO:0007264|GO:0005886|GO:0005525|GO:0000166|GO:0005770|GO:0006810	NM_019773	Mm.25306	56382	ENSMUST00000049435	TC1576310
A_51_P381321	0.000338525	1.91648	down	19886.7	21515.6	9.07103	8.13258	20799.1	19440.8	19420.2	20814.7	22327.6	21404.5	9.04355	8.94836	9.22119	8.1235	8.17052	8.10371	NM_199080	chr15:79358396-79358337	Ddx17	Mus musculus DEAD (Asp-Glu-Ala-Asp) box polypeptide 17 (Ddx17), transcript variant 1, mRNA [NM_199080]	GO:0004386|GO:0003676|GO:0008026|GO:0005634|GO:0016787|GO:0005524|GO:0003723|GO:0000166	NM_199080	Mm.29644	67040	ENSMUST00000054014	TC1573926
A_52_P617838	3.64254e-05	2.49468	down	146.436	120.752	1.97442	0.655571	152.466	165.342	121.5	124.53	117.526	120.199	1.95166	2.07087	1.90073	0.738534	0.600816	0.627362	AK044432	chr2:57088865-57088806		RIKEN cDNA A930012O16 gene Gene [Source:MGI Symbol;Acc:MGI:2442255] [ENSMUST00000067049]			Mm.347582		ENSMUST00000067049
A_52_P11351	0.00446762	4.45242	down	85.4287	39.91	1.17644	-0.97815	74.6653	69.7939	111.827	28.884	50.4248	40.4212	0.921683	0.826588	1.78105	-1.36962	-0.619958	-0.944874	AK048052	chr13:32266520-32266461		Mus musculus 16 days embryo head cDNA, RIKEN full-length enriched library, clone:C130032B16 product:unclassifiable, full insert sequence. [AK048052]			Mm.417750
A_52_P614888	0.000810646	1.86376	down	2294.13	2558.08	5.94991	5.05169	2476.56	2400	2005.81	2161.79	2729.32	2783.13	5.97344	5.93038	5.9459	4.8562	5.1383	5.16057	NM_022028	chr12:71066238-71066179	Sav1	Mus musculus salvador homolog 1 (Drosophila) (Sav1), mRNA [NM_022028]	GO:0005515|GO:0008150|GO:0003674|GO:0007165|GO:0005575	NM_022028	Mm.390480	64010	ENSMUST00000021467	TC1609382
A_51_P322170	8.98275e-06	4.88196	down	695.741	294.8	4.22563	1.93817	773.631	721.372	592.22	263.843	293.713	326.845	4.29482	4.19616	4.18592	1.82172	1.92224	2.07055	M35662	chr13:27192011-27192070	Prl3d1	Mouse placental lactogen I (PL-I) mRNA, complete cds. [M35662]	GO:0005179|GO:0005576|GO:0005615		Mm.233151	18775
A_51_P226016	0.0128908	2.14149	down	2413.78	2316.95	6.01171	4.91309	2051.51	2240.9	2948.94	2071.26	2341.06	2538.54	5.70179	5.83142	6.50191	4.79448	4.91693	5.02787	NM_011774	chr2:122507334-122507275	Slc30a4	Mus musculus solute carrier family 30 (zinc transporter), member 4 (Slc30a4), mRNA [NM_011774]	GO:0005385|GO:0016020|GO:0055085|GO:0006811|GO:0055069|GO:0006812|GO:0005768|GO:0016023|GO:0016021|GO:0008324|GO:0006829|GO:0006810	NM_011774	Mm.27801	22785	ENSMUST00000005952	TC1631525
A_51_P466828	0.039468	1.5014	down	3668.15	5121.3	6.62087	6.03456	4195.23	3753.95	3055.27	3842.32	6200.11	5321.46	6.73385	6.57575	6.55301	5.68595	6.32206	6.09569	AK039192	chr5:122304576-122304635	Fam109a	Mus musculus adult male hypothalamus cDNA, RIKEN full-length enriched library, clone:A230106M15 product:hypothetical Pleckstrin homology (PH) domain containing protein, full insert sequence. [AK039192]	GO:0008150|GO:0003674|GO:0005575		Mm.12654	231717
A_52_P491544	0.000196302	3.20548	down	2658.62	1716.59	6.16379	4.48325	2936.05	2397.56	2642.25	1585.49	1775.66	1788.63	6.21898	5.92891	6.34348	4.4089	4.51812	4.52273	NM_017464	chr13:41405881-41405822	Nedd9	Mus musculus neural precursor cell expressed, developmentally up-regulated gene 9 (Nedd9), transcript variant 2, mRNA [NM_017464]	GO:0005634|GO:0005515|GO:0007155|GO:0007067|GO:0040008|GO:0005856|GO:0005737|GO:0051301|GO:0007049	NM_017464	Mm.288980	18003	ENSMUST00000021794	TC1575496
A_51_P124035	0.0127651	2.07303	down	880.524	873.478	4.55892	3.50718	802.671	771.271	1067.63	799.1	872.762	948.572	4.34798	4.29265	5.03612	3.42042	3.49342	3.6077	NM_175294	chr1:133829391-133829450	Nucks1	Mus musculus nuclear casein kinase and cyclin-dependent kinase substrate 1 (Nucks1), transcript variant 1, mRNA [NM_175294]	GO:0005634|GO:0008150|GO:0003674|GO:0005737	NM_175294	Mm.436518	98415	ENSMUST00000062264	TC1574578
A_51_P444301	5.50291e-05	2.47742	down	11286.7	9427.83	8.24951	6.94067	11856.9	12026	9977.15	10064.2	8812.56	9406.72	8.23276	8.25543	8.26034	7.07513	6.82932	6.91756	NM_018819	chr17:8489762-8489821	Brp44l	Mus musculus brain protein 44-like (Brp44l), mRNA [NM_018819]	GO:0008150|GO:0003674|GO:0005739|GO:0005743	NM_018819	Mm.288510	55951	ENSMUST00000124023	TC1700543
A_51_P455429	0.000431033	3.41905	down	47.9585	29.035	0.371013	-1.40258	42.4674	50.2701	51.1381	27.9976	27.6869	31.4206	0.107601	0.353186	0.652252	-1.41458	-1.48489	-1.30828	AK052826	chr4:56898632-56898573	D730040F13Rik	Mus musculus 10 days lactation, adult female mammary gland cDNA, RIKEN full-length enriched library, clone:D730040F13 product:hypothetical metalthio containing protein, full insert sequence. [AK052826]	GO:0008150|GO:0003674|GO:0005575			242474		TC1603948
A_52_P868798	0.0165781	1.88334	down	40.6506	44.9741	0.130156	-0.78314	35.0209	43.7675	43.1633	51.2717	36.6375	47.0131	-0.170539	0.153345	0.407661	-0.541724	-1.08077	-0.726924		chr18:024157365-024157306
A_51_P114456	7.70708e-05	1.56882	down	115.786	152.564	1.64146	0.991776	119.68	126.22	101.458	144.108	152.029	161.554	1.60235	1.68136	1.64066	0.949188	0.972181	1.05396	NM_025617	chr4:106807163-106807104	2210012G02Rik	Mus musculus RIKEN cDNA 2210012G02 gene (2210012G02Rik), mRNA [NM_025617]	GO:0030528|GO:0005634|GO:0005515|GO:0003702|GO:0008150|GO:0006350|GO:0003674|GO:0006354|GO:0003677|GO:0003746|GO:0006355|GO:0005575	NM_025617	Mm.479570	66526	ENSMUST00000057043	TC1587514
A_51_P360678	4.30632e-05	3.89363	down	500.721	264.82	3.74446	1.78335	581.241	514.86	406.062	233.07	286.161	275.229	3.88231	3.7096	3.64148	1.64281	1.88466	1.82257	NM_146228	chr9:110801465-110801524	Als2cl	Mus musculus ALS2 C-terminal like (Als2cl), transcript variant 3, mRNA [NM_146228]	GO:0017137|GO:0005515|GO:0007032|GO:0005089|GO:0042802|GO:0005737|GO:0035023|GO:0008104|GO:0005096|GO:0016023|GO:0017112|GO:0005622	NM_146228	Mm.86338	235633	ENSMUST00000084926	TC1578936
A_51_P496814	0.0168402	1.9735	down	1444.69	1564.39	5.28772	4.30696	1492.22	1475.57	1366.29	1057.09	1757.83	1878.23	5.24256	5.22861	5.39198	3.82407	4.50356	4.59324	NM_019745	chr3:75324992-75324687	Pdcd10	Mus musculus programmed cell death 10 (Pdcd10), mRNA [NM_019745]	GO:0008150|GO:0003674|GO:0006915|GO:0005575	NM_019745	Mm.316473	56426	ENSMUST00000029424	TC1650634
A_51_P225827	0.0267236	1.8625	down	454.604	482.764	3.54685	2.64961	449.745	629.464	284.602	423.791	515.371	509.131	3.51228	3.99954	3.12873	2.5054	2.73345	2.70998	NM_019935	chr19:5550316-5550257	Ovol1	Mus musculus OVO homolog-like 1 (Drosophila) (Ovol1), mRNA [NM_019935]	GO:0003700|GO:0006350|GO:0007283|GO:0008544|GO:0045449|GO:0005634|GO:0000239|GO:0046872|GO:0003677|GO:0008270|GO:0007498|GO:0000122|GO:0005622	NM_019935	Mm.280225	18426	ENSMUST00000025861	TC1582281
A_52_P587378	0.0237665	2.59251	down	4244.24	3251.61	6.78044	5.40609	3106.86	3554.74	6071.1	3168.82	3167.63	3418.38	6.30056	6.49709	7.54367	5.40792	5.35317	5.45718	NM_011200	chr1:30999940-30999881	Ptp4a1	Mus musculus protein tyrosine phosphatase 4a1 (Ptp4a1), mRNA [NM_011200]	GO:0005886|GO:0007275|GO:0030335|GO:0005768|GO:0007049|GO:0016311|GO:0004727|GO:0005634|GO:0016787|GO:0004721|GO:0016020|GO:0005737|GO:0005856|GO:0016791|GO:0004725|GO:0005783|GO:0006470	NM_011200	Mm.478332	19243	ENSMUST00000076587	TC1584268
A_51_P302856	0.000884941	9.34523	down	430.113	99.0638	3.53028	0.306047	411.036	377.084	502.217	62.6904	103.776	130.725	3.38244	3.2603	3.94809	-0.251642	0.421306	0.748479	NM_053215	chr5:87669766-87669707	Ugt2b37	Mus musculus UDP glucuronosyltransferase 2 family, polypeptide B37 (Ugt2b37), mRNA [NM_053215]	GO:0016757|GO:0008150|GO:0003674|GO:0016740|GO:0005743	NM_053215	Mm.160362	112417	ENSMUST00000075858	TC1606243
A_51_P517430	0.00124481	1.71676	down	936.486	1121.18	4.64851	3.86883	1114.9	907.635	786.92	1038.82	1149.39	1175.33	4.82202	4.52753	4.596	3.79892	3.89064	3.91693	NM_007639	chr3:86799850-86799791	Cd1d1	Mus musculus CD1d1 antigen (Cd1d1), mRNA [NM_007639]	GO:0019882|GO:0051135|GO:0005515|GO:0006955|GO:0005886|GO:0030883|GO:0042613|GO:0005768|GO:0050776|GO:0045078|GO:0045059|GO:0005770|GO:0051138|GO:0045086|GO:0005764|GO:0005769|GO:0016020|GO:0045404|GO:0009897|GO:0045087|GO:0001916|GO:0002504|GO:0016021|GO:0048007	NM_007639	Mm.1894	12479	ENSMUST00000029717	TC1596463
A_51_P510914	0.000327185	1.98514	down	1354.93	1406.69	5.18719	4.19795	1570.1	1282.77	1211.93	1379.1	1438.77	1402.19	5.31595	5.0266	5.21902	4.2077	4.2146	4.17155	AK013921	chr2:175872655-175872714		KRAB box and zinc finger, C2H2 type domain containing [Source:RefSeq peptide;Acc:NP_001092778] [ENSMUST00000109055]			Mm.441314		ENSMUST00000109055
A_51_P213266	0.00126878	2.04665	down	713.125	713.266	4.24825	3.21498	770.966	821.339	547.07	777.298	704.721	657.779	4.28984	4.38339	4.07151	3.38051	3.18489	3.07954	NM_007558	chr4:122990078-122990019	Bmp8a	Mus musculus bone morphogenetic protein 8a (Bmp8a), mRNA [NM_007558]	GO:0007179|GO:0005576|GO:0051216|GO:0040007|GO:0005125|GO:0001503|GO:0007275|GO:0005615|GO:0030154|GO:0008083|GO:0007283|GO:0007281	NM_007558	Mm.439749	12163	ENSMUST00000040496	NP382281
A_51_P128885	0.00085617	2.85317	down	163.224	119.04	2.14079	0.628229	159.856	154.213	175.602	102.719	127.744	126.655	2.01995	1.97034	2.43209	0.460748	0.721092	0.702847	NM_023179	chr17:35374679-35374738	Atp6v1g2	Mus musculus ATPase, H+ transporting, lysosomal V1 subunit G2 (Atp6v1g2), mRNA [NM_023179]	GO:0005515|GO:0030285|GO:0008150|GO:0006811|GO:0016887|GO:0015992|GO:0008553|GO:0006810|GO:0016820|GO:0016471	NM_023179	Mm.396107	66237	ENSMUST00000118384	TC1650105
A_51_P435198	8.26824e-06	1.94679	down	2478.55	2624.97	6.05922	5.09813	2741.49	2571	2123.17	2601.22	2623.55	2650.13	6.12006	6.02967	6.02793	5.12316	5.08128	5.08993	NM_009968	chr3:154285974-154286035	Cryz	Mus musculus crystallin, zeta (Cryz), mRNA [NM_009968]	GO:0003960|GO:0008150|GO:0008152|GO:0005737|GO:0003730|GO:0050661|GO:0008270|GO:0005488|GO:0016491|GO:0003824|GO:0005625|GO:0055114	NM_009968	Mm.374855	12972	ENSMUST00000029850	TC1580336
A_52_P156796	0.0227675	3.75763	down	287.823	177.628	2.94564	1.03581	310.081	322.839	230.549	73.9824	214.657	244.246	2.97582	3.03623	2.82486	-0.0127039	1.46987	1.65027	XM_139814	chr17:22338327-22338268	Gm4944	PREDICTED: Mus musculus predicted gene, EG240038, transcript variant 1 (EG240038), mRNA [XM_139814]	GO:0008150|GO:0003674|GO:0005575	XM_139814	Mm.227945	240038
A_52_P459238	0.00382185	2.30694	down	461.931	413.462	3.63594	2.42996	431.962	422.493	531.338	388.608	438.159	413.619	3.45408	3.42434	4.02941	2.38036	2.49929	2.41024	AK088922	chr13:104993331-104993390		tripartite motif-containing 23 Gene [Source:MGI Symbol;Acc:MGI:1933161] [ENSMUST00000069187]			Mm.244190		ENSMUST00000069187	TC1591613
A_52_P171019	0.000555642	2.87434	down	229.654	167.181	2.63558	1.11235	229.839	228.995	230.127	138.798	170.021	192.724	2.5438	2.54073	2.82221	0.895025	1.13355	1.30847	NM_008548	chr10:53626202-53626143	Man1a	Mus musculus mannosidase 1, alpha (Man1a), mRNA [NM_008548]	GO:0004571|GO:0016787|GO:0046872|GO:0016020|GO:0016798|GO:0008152|GO:0000139|GO:0016021|GO:0005794|GO:0005509	NM_008548	Mm.117294	17155	ENSMUST00000003843	TC1576351
A_51_P454309	0.0158161	1.56949	down	100.046	131.871	1.4243	0.774005	118.97	88.5586	92.6098	111.694	139.848	144.071	1.59377	1.17012	1.50902	0.581599	0.851692	0.888724	NM_145577	chr7:7154846-7154833	Zfp772	Mus musculus zinc finger protein 772 (Zfp772), mRNA [NM_145577]	GO:0046872|GO:0008150|GO:0003674|GO:0005575	NM_145577	Mm.360403	232855	ENSMUST00000074455	TC1583985
A_51_P180613	0.00030306	1.7489	down	3010.78	3569.29	6.34743	5.54099	3113.46	3038.04	2880.84	3541.77	3697.96	3468.12	6.30362	6.27048	6.4682	5.56844	5.57649	5.47802	NM_153783	chr7:147320172-147320231	Paox	Mus musculus polyamine oxidase (exo-N4-amino) (Paox), mRNA [NM_153783]	GO:0005777|GO:0046592|GO:0006598|GO:0005737|GO:0016491|GO:0005575|GO:0055114	NM_153783	Mm.44197	212503	ENSMUST00000026537	TC1580560
A_52_P331215	4.30543e-05	2.97269	down	233.733	163.031	2.6602	1.08843	244.348	230.86	225.992	164.842	156.34	167.912	2.63211	2.55243	2.79606	1.14313	1.01252	1.10965	AK161721	chr11:77995773-77995832	Tlcd1	Mus musculus adult male thymus cDNA, RIKEN full-length enriched library, clone:5830414K04 product:hypothetical Eukaryotic protein of unknown function DUF887/TRAM, LAG1 and CLN8 homology containing protein, full insert sequence. [AK161721]	GO:0016020|GO:0008150|GO:0003674|GO:0016021|GO:0005575		Mm.390375	68385		TC1717747
A_52_P11529	0.00125273	3.13045	down	54.4129	35.8474	0.549134	-1.09723	46.5318	55.6773	61.0297	37.7659	34.3931	35.3832	0.239463	0.500575	0.907366	-0.982803	-1.17197	-1.13692	AK046103	chr14:105313929-105313988	D130009I18Rik	Mus musculus adult male corpora quadrigemina cDNA, RIKEN full-length enriched library, clone:B230341P19 product:unclassifiable, full insert sequence. [AK046103]	GO:0008150|GO:0003674|GO:0005575		Mm.320725	320249
A_52_P219393	0.0424322	5.8007	down	176.614	89.3932	2.23612	-0.300103	136.519	192.891	200.431	34.6077	198.465	35.1069	1.79228	2.2932	2.62289	-1.10879	1.35672	-1.14823	NM_019690	chr2:174109894-174109953	Gnas	Mus musculus GNAS (guanine nucleotide binding protein, alpha stimulating) complex locus (Gnas), transcript variant 4, mRNA [NM_019690]	GO:0007191|GO:0051216|GO:0044424|GO:0048701|GO:0042383|GO:0005886|GO:0006112|GO:0019001|GO:0045672|GO:0035116|GO:0000166|GO:0042493|GO:0001501|GO:0031410|GO:0016020|GO:0045669|GO:0005834|GO:0031852|GO:0005576|GO:0005515|GO:0005525|GO:0007186|GO:0005768|GO:0001958|GO:0007189|GO:0003924|GO:0007165|GO:0009791|GO:0040032|GO:0042995|GO:0005624|GO:0005737|GO:0031982|GO:0004871	NM_019690	Mm.125770	14683	ENSMUST00000076093	TC1593648
A_52_P670745	0.00149022	1.99494	down	2068.03	2163.82	5.80614	4.80979	2102.9	2075.13	2026.05	1856.07	2465.3	2170.08	5.73748	5.72055	5.96038	4.63622	4.99153	4.80161	NM_025374	chr17:30731129-30731070	Glo1	Mus musculus glyoxalase 1 (Glo1), transcript variant 1, mRNA [NM_025374]	GO:0016829|GO:0009438|GO:0046872|GO:0005975|GO:0004462|GO:0006749|GO:0005625	NM_025374	Mm.261984	109801	ENSMUST00000024823	TC1650423
A_52_P102413	0.00952096	1.74556	down	65.2802	77.4727	0.812982	0.00928926	56.4909	72.8171	66.5327	68.8834	76.7821	86.7527	0.519263	0.887764	1.03192	-0.11573	-0.0133224	0.15692	NM_145930	chr15:3935001-3934942	AW549877	Mus musculus expressed sequence AW549877 (AW549877), mRNA [NM_145930]	GO:0008150|GO:0003674|GO:0005575	NM_145930	Mm.21299	106064	ENSMUST00000046633	TC1579208
A_51_P379390	0.0967314	1.6473	down	1862.79	2248.9	5.56949	4.84939	2549.01	1954.37	1084.99	1989.51	2866.69	1890.49	6.01504	5.63404	5.0594	4.73638	5.20915	4.60263	X84692	chr2:37339227-37339168	Strbp	M.musculus Spnr mRNA for RNA binding protein. [X84692]	GO:0007275|GO:0007286|GO:0030154|GO:0006928|GO:0003723|GO:0003727|GO:0007283|GO:0007638|GO:0003677|GO:0005737|GO:0005856|GO:0015630|GO:0003725|GO:0005622		Mm.237095	20744		TC1620848
A_52_P533779	0.00165655	1.89167	down	384.126	418.15	3.35992	2.44026	452.346	391.984	308.047	362.517	466.174	425.758	3.5206	3.31621	3.24293	2.28009	2.5887	2.45198	NM_027799	chr11:94202669-94202728	Ankrd40	Mus musculus ankyrin repeat domain 40 (Ankrd40), transcript variant 1, mRNA [NM_027799]	GO:0008150|GO:0003674|GO:0005575	NM_027799	Mm.141054	71452	ENSMUST00000107818	TC1603603
A_52_P276727	0.0083914	2.05319	down	1401.1	1426.57	5.23896	4.20109	1229.78	1481.8	1491.71	1126.97	1578.22	1574.53	4.9635	5.23469	5.51868	3.91642	4.34806	4.33879	NM_172671	chr2:109854007-109854066	Lgr4	Mus musculus leucine-rich repeat-containing G protein-codownled receptor 4 (Lgr4), mRNA [NM_172671]	GO:0004872|GO:0005515|GO:0004930|GO:0005886|GO:0007186|GO:0035239|GO:0007165|GO:0030539|GO:0016500|GO:0016020|GO:0050673|GO:0004871|GO:0016021	NM_172671	Mm.479280	107515	ENSMUST00000046548	TC1583322
A_52_P652293	0.00793602	1.98342	down	78.1786	81.4242	1.07346	0.085468	73.2815	71.6038	89.6505	78.7155	87.5449	78.0122	0.894694	0.863522	1.46217	0.0767608	0.17593	0.00371265	AK038152	chr6:37918301-37918360	Trim24	Mus musculus 16 days neonate thymus cDNA, RIKEN full-length enriched library, clone:A130082H20 product:unclassifiable, full insert sequence. [AK038152]	GO:0004672|GO:0005719|GO:0006350|GO:0055074|GO:0005730|GO:0045449|GO:0045892|GO:0070562|GO:0005634|GO:0046777|GO:0046872|GO:0003677|GO:0006468|GO:0008270|GO:0005622|GO:0008285|GO:0010628|GO:0005515|GO:0016986|GO:0070063|GO:0043565|GO:0045941|GO:0005726|GO:0006352|GO:0005737|GO:0016922|GO:0003682|GO:0016564			21848		TC1607229
A_52_P448106	0.0196408	1.85964	down	160.371	177.604	2.10388	1.20886	144.187	144.489	192.435	162.152	193.447	177.211	1.87112	1.87638	2.56416	1.11939	1.31977	1.18741	AK018520	chr9:9147458-9147399	9030420J04Rik	Mus musculus adult male colon cDNA, RIKEN full-length enriched library, clone:9030420J04 product:RIKEN cDNA 9030420J04 gene, full insert sequence. [AK018520]	GO:0008150|GO:0003674|GO:0005096|GO:0005575			71544		TC1590137
A_51_P457857	0.0746924	1.61857	down	751.063	954.04	4.32224	3.62752	643.044	664.272	945.872	796.691	1036.04	1029.39	4.02809	4.07719	4.86143	3.41606	3.74084	3.72566	NM_010763	chr3:100370419-100370360	Man1a2	Mus musculus mannosidase, alpha, class 1A, member 2 (Man1a2), mRNA [NM_010763]	GO:0004571|GO:0016787|GO:0016020|GO:0016798|GO:0008152|GO:0000139|GO:0048286|GO:0009100|GO:0007585|GO:0016021|GO:0005794|GO:0005509	NM_010763	Mm.271617	17156	ENSMUST00000090730	TC1578707
A_51_P124089	0.00101005	1.70949	down	3145.52	3782.67	6.39673	5.62317	3445.51	3454.71	2536.34	3970.94	3874.83	3502.25	6.44982	6.45591	6.28446	5.73345	5.6439	5.49215	NM_019581	chr17:46305751-46305810	Gtpbp2	Mus musculus GTP binding protein 2 (Gtpbp2), transcript variant 1, mRNA [NM_019581]	GO:0005525|GO:0000166|GO:0003924	NM_019581	Mm.22147	56055	ENSMUST00000024748	TC1574667
A_51_P451346	0.0106903	2.07966	down	13988.8	13824.5	8.55047	7.49412	12515	12652.8	16798.5	13639.5	14500.5	13333.6	8.31069	8.32873	9.01197	7.51369	7.54779	7.42087	NM_011803	chr13:5869371-5869430	Klf6	Mus musculus Krdownpel-like factor 6 (Klf6), mRNA [NM_011803]	GO:0003676|GO:0003700|GO:0006350|GO:0045944|GO:0019221|GO:0003690|GO:0045449|GO:0005634|GO:0046872|GO:0003677|GO:0005737|GO:0008270|GO:0005622	NM_011803	Mm.275036	23849	ENSMUST00000000080
A_51_P291304	0.00419756	1.82409	down	476.956	547.599	3.68895	2.82177	474.185	500.375	456.309	442.057	625.099	575.642	3.58862	3.66842	3.80979	2.56627	3.01192	2.88711	AK008706	chr2:80474463-80474522	2210011G09Rik	Mus musculus adult male stomach cDNA, RIKEN full-length enriched library, clone:2210011G09 product:unclassifiable, full insert sequence. [AK008706]	GO:0008150|GO:0003674|GO:0005575		Mm.166813	72347
A_52_P1187697	0.0519132	1.77147	down	141.423	162.474	1.90578	1.08083	116.163	124.513	183.594	147.196	171.232	168.995	1.55932	1.66172	2.4963	0.979781	1.14379	1.11892	AK039199	chr9:58468646-58468705		Mus musculus adult male hypothalamus cDNA, RIKEN full-length enriched library, clone:A230106P21 product:unclassifiable, full insert sequence. [AK039199]			Mm.443623			TC1618875
A_51_P399106	0.000249808	1.56161	down	1788.64	2359.08	5.58569	4.94266	1871.98	2003.11	1490.83	2219.24	2388.08	2469.92	5.56967	5.66958	5.51783	4.89404	4.94562	4.98833	NM_145448	chr12:102110422-102110481	9030617O03Rik	Mus musculus RIKEN cDNA 9030617O03 gene (9030617O03Rik), mRNA [NM_145448]	GO:0008150|GO:0003674|GO:0005739	NM_145448	Mm.218590	217830	ENSMUST00000110073	TC1772399
A_52_P270490	0.00712903	1.66785	down	645.592	785.572	4.095	3.35702	804.892	651.64	480.246	817.213	759.323	780.181	4.35197	4.04949	3.88356	3.45275	3.29255	3.32575	NM_001003815	chr2:156368500-156368559	Epb4.1l1	Mus musculus erythrocyte protein band 4.1-like 1 (Epb4.1l1), transcript variant 2, mRNA [NM_001003815]	GO:0005515|GO:0008092|GO:0019898|GO:0005856|GO:0005737|GO:0030866|GO:0005488|GO:0005198|GO:0003779	NM_001003815	Mm.20852	13821	ENSMUST00000109576
A_52_P664656	0.00782543	2.11748	down	206.145	201.377	2.47025	1.38791	181.822	197.743	238.871	177.96	204.186	221.985	2.2057	2.32904	2.87601	1.25359	1.39772	1.5124	NM_007396	chr2:48757324-48757383	Acvr2a	Mus musculus activin receptor IIA (Acvr2a), mRNA [NM_007396]	GO:0004702|GO:0004672|GO:0050999|GO:0005524|GO:0000166|GO:0043621|GO:0007283|GO:0001702|GO:0001934|GO:0046872|GO:0016020|GO:0007368|GO:0006468|GO:0016301|GO:0019838|GO:0032924|GO:0008584|GO:0007498|GO:0005024|GO:0016021|GO:0048185|GO:0048187|GO:0005515|GO:0004872|GO:0043084|GO:0030509|GO:0016740|GO:0030510|GO:0060011|GO:0048186|GO:0007178|GO:0004675|GO:0042713|GO:0004674|GO:0016362|GO:0017002|GO:…	NM_007396	Mm.314338	11480	ENSMUST00000112783	TC1582102
A_52_P607103	6.81152e-05	2.82857	down	3977.8	2913.43	6.74839	5.24832	4247.48	3825.29	3860.64	2908.25	2984.31	2847.72	6.75171	6.60291	6.89055	5.28412	5.26716	5.19368	NM_181585	chr4:115975299-115975358	Pik3r3	Mus musculus phosphatidylinositol 3 kinase, regulatory subunit, polypeptide 3 (p55) (Pik3r3), mRNA [NM_181585]	GO:0005515|GO:0046935|GO:0005942|GO:0008286|GO:0035014|GO:0016301	NM_181585	Mm.253819	18710	ENSMUST00000030464	TC1601114
A_51_P444984	0.00170854	2.6111	down	65.6611	52.4472	0.825357	-0.559299	58.9812	69.1191	68.883	43.1811	56.2438	57.9166	0.581501	0.81257	1.082	-0.789486	-0.462398	-0.426012	BC130250	chr11:108548745-108548686		Mus musculus cDNA clone IMAGE:40142431. [BC130250]			Mm.455306
A_52_P656418	0.000106137	2.59079	down	2964.2	2377.36	6.32536	4.95196	3045.59	2957.72	2889.28	2156.2	2466.34	2509.54	6.27182	6.23183	6.47242	4.85246	4.99213	5.01129	NM_008591	chr6:17523765-17523824	Met	Mus musculus met proto-oncogene (Met), mRNA [NM_008591]	GO:0004672|GO:0004713|GO:0001889|GO:0005524|GO:0014812|GO:0000166|GO:0009925|GO:0000187|GO:0046777|GO:0016020|GO:0001764|GO:0006468|GO:0016301|GO:0016021|GO:0005515|GO:0004872|GO:0048012|GO:0001890|GO:0007517|GO:0007275|GO:0030317|GO:0016740|GO:0007420|GO:0014902|GO:0051450|GO:0005008|GO:0007519|GO:0005624|GO:0019861|GO:0004714|GO:0030534|GO:0060665|GO:0007169	NM_008591	Mm.86844	17295	ENSMUST00000115443	TC1623772
A_51_P294515	0.0134374	2.12756	down	1487.7	1374.88	5.25427	4.16507	1795.08	1799.07	868.957	1357.64	1370.21	1396.78	5.50915	5.51459	4.73907	4.18507	4.14416	4.16598	NM_019580	chr7:125835134-125832643	Gde1	Mus musculus glycerophosphodiester phosphodiesterase 1 (Gde1), mRNA [NM_019580]	GO:0005515|GO:0006071|GO:0008081|GO:0007186|GO:0047395|GO:0006629|GO:0005887|GO:0016787|GO:0016020|GO:0046872|GO:0008889|GO:0005737|GO:0016021	NM_019580	Mm.273142	56209	ENSMUST00000038791	TC1572515
A_52_P627269	8.239e-06	6.21488	down	55328.4	18456	10.5475	7.91179	53951.3	57323.9	54709.9	18440.5	18193.9	18733.7	10.4187	10.5084	10.7154	7.94877	7.87515	7.91143	NM_198171	chr8:107362421-107362480	BC015286	Mus musculus cDNA sequence BC015286 (BC015286), mRNA [NM_198171]	GO:0016787|GO:0008150|GO:0003674|GO:0005575	NM_198171	Mm.443387	234669	ENSMUST00000059449	TC1589436
A_52_P473209	0.000794291	3.82639	down	1260.87	678.764	5.0822	3.14621	1182.11	1124.83	1475.66	650.651	695.837	689.804	4.90647	4.83705	5.50307	3.12393	3.16659	3.14813	NM_001081264	chr4:99429906-99429965	Alg6	Mus musculus asparagine-linked glycosylation 6 homolog (yeast, alpha-1,3,-glucosyltransferase) (Alg6), mRNA [NM_001081264]	GO:0016757|GO:0046527|GO:0016020|GO:0005789|GO:0016740|GO:0016758|GO:0016021|GO:0006487|GO:0005575|GO:0005783	NM_001081264	Mm.32408	320438	ENSMUST00000107007	TC1647306
A_52_P9337	0.00152866	2.11079	down	31.4698	30.6673	-0.25371	-1.3315	34.2596	36.012	24.1379	26.2578	35.1569	30.5871	-0.202248	-0.128036	-0.430846	-1.50714	-1.14028	-1.34707	NM_010438	chr10:61778260-61778201	Hk1	Mus musculus hexokinase 1 (Hk1), nuclear gene encoding mitochondrial protein, transcript variant 2, mRNA [NM_010438]	GO:0005741|GO:0004672|GO:0018107|GO:0005524|GO:0043066|GO:0000166|GO:0016020|GO:0046777|GO:0005829|GO:0006468|GO:0016301|GO:0016773|GO:0005515|GO:0010359|GO:0005901|GO:0005536|GO:0016740|GO:0005975|GO:0005739|GO:0042803|GO:0006096|GO:0018105|GO:0004396|GO:0046835|GO:0004340|GO:0018108	NM_010438	Mm.196605	15275	ENSMUST00000139228	TC1686155
A_51_P513611	0.000260222	2.16203	down	3487.37	3346.34	6.55973	5.44734	3609.06	3399.08	3453.96	3164.84	3464.57	3409.62	6.51672	6.43249	6.72996	5.4061	5.48244	5.45348	NM_146078	chr17:47065401-47065342	Ubr2	Mus musculus ubiquitin protein ligase E3 component n-recognin 2 (Ubr2), transcript variant 1, mRNA [NM_146078]	GO:0005634|GO:0005515|GO:0046872|GO:0006511|GO:0007141|GO:0004842|GO:0008270|GO:0007283|GO:0000151|GO:0030163|GO:0016874	NM_146078	Mm.28234	224826	ENSMUST00000113335	TC1574420
A_52_P11388	0.00581361	2.01925	down	28.4204	28.4098	-0.422741	-1.43656	31.6015	34.3637	19.2961	28.09	25.6893	31.4502	-0.318763	-0.195628	-0.753833	-1.40983	-1.59293	-1.30692	NM_008149	chr19:55145462-55145403	Gpam	Mus musculus glycerol-3-phosphate acyltransferase, mitochondrial (Gpam), nuclear gene encoding mitochondrial protein, mRNA [NM_008149]	GO:0004366|GO:0005741|GO:0055089|GO:0070970|GO:0006650|GO:0005743|GO:0050707|GO:0070236|GO:0016020|GO:0008152|GO:0006631|GO:0016021|GO:0006641|GO:0040018|GO:0014823|GO:0010867|GO:0016740|GO:0055091|GO:0005739|GO:0042104|GO:0032869|GO:0008415|GO:0006637|GO:0031966|GO:0051607|GO:0009749|GO:0008654	NM_008149	Mm.210196	14732	ENSMUST00000061856	TC1628149
A_51_P154840	0.00345114	1.66433	down	128.637	159.285	1.78232	1.04738	149.588	133.311	103.012	136.134	168.263	173.457	1.92417	1.76021	1.66259	0.867071	1.11855	1.15652	XM_001000195	chr6:29997554-29997495	1700080G18Rik	PREDICTED: Mus musculus RIKEN cDNA 1700080G18 gene (1700080G18Rik), mRNA [XM_001000195]	GO:0008150|GO:0003674|GO:0005575	XM_001000195	Mm.411181	73533		TC1638730
A_52_P625118	0.0552705	1.50477	down	542.506	731.761	3.82974	3.2402	680.033	578.941	368.544	595.497	753.249	846.537	4.10878	3.87883	3.50162	2.99614	3.28096	3.44351	NM_007592	chr4:8072763-8072704	Car8	Mus musculus carbonic anhydrase 8 (Car8), mRNA [NM_007592]	GO:0005515|GO:0006730|GO:0046872|GO:0004089|GO:0005737|GO:0048015|GO:0008270	NM_007592	Mm.119320	12319	ENSMUST00000066674	TC1596317
A_52_P485700	0.00460564	1.80769	down	5300.79	6073.01	7.16169	6.30755	5274.59	4927.04	5700.74	5835.95	6072.94	6310.14	7.06416	6.96806	7.45286	6.28894	6.29216	6.34154	NM_026352	chr3:79407089-79407148	Ppid	Mus musculus peptidylprolyl isomerase D (cyclophilin D) (Ppid), mRNA [NM_026352]	GO:0008150|GO:0042277|GO:0005737|GO:0016853|GO:0006457|GO:0005488|GO:0005528|GO:0003755|GO:0005575	NM_026352	Mm.295252	67738	ENSMUST00000029382	TC1572328
A_52_P194680	8.37282e-06	1.98345	down	312.187	324.798	3.07148	2.08347	344.653	320.336	271.571	323.004	326.51	324.879	3.12832	3.025	3.06111	2.1136	2.07496	2.06184	BI152977	chr7:140177792-140177851	Zranb1	zinc finger, RAN-binding domain containing 1 Gene [Source:MGI Symbol;Acc:MGI:106441] [ENSMUST00000106157]	GO:0005634|GO:0016787|GO:0046872|GO:0008150|GO:0003674|GO:0005737|GO:0008270|GO:0008233|GO:0016055|GO:0008234|GO:0005622		Mm.393986	360216	ENSMUST00000106157	TC1599498
A_52_P480064	0.00136327	1.65642	down	8425.44	10469.9	7.81975	7.09168	9407.66	8973.51	6895.15	11325.2	10002.7	10081.7	7.89894	7.83302	7.72729	7.24543	7.01209	7.01753	NM_001078649	chr19:4131493-4131552	Tmem134	Mus musculus transmembrane protein 134 (Tmem134), transcript variant 1, mRNA [NM_001078649]	GO:0016020|GO:0008150|GO:0003674|GO:0016021|GO:0005575	NM_001078649	Mm.276255	66990	ENSMUST00000138593	NP585714
A_52_P218765	0.000632444	1.74347	down	3313.52	3907.31	6.47249	5.67052	3625.51	3628.51	2686.53	4108.08	3939.71	3674.16	6.52328	6.52672	6.36745	5.78243	5.66785	5.56128	NM_198664	chr4:46617395-46617336	Tbc1d2	Mus musculus TBC1 domain family, member 2 (Tbc1d2), mRNA [NM_198664]	GO:0008150|GO:0003674|GO:0005575	NM_198664	Mm.331595	381605	ENSMUST00000107753	TC1609851
A_51_P479230	0.000919962	2.91603	down	278.226	191.997	2.86869	1.32469	296.235	347.257	191.185	197.874	188.936	189.181	2.90991	3.14142	2.55475	1.40663	1.28573	1.28171	NM_023455	chr6:85780487-85780428	Nat8	Mus musculus N-acetyltransferase 8 (GCN5-related, putative) (Nat8), mRNA [NM_023455]	GO:0005715|GO:0007275|GO:0016740|GO:0008080|GO:0001702|GO:0016020|GO:0008152|GO:0008415|GO:0007162|GO:0007369|GO:0016021|GO:0005783|GO:0005794	NM_023455	Mm.154782	68396	ENSMUST00000032073	TC1585752
A_51_P310649	0.000276961	1.54727	down	1461.04	1942.12	5.29275	4.66303	1586.12	1596.4	1200.61	1933.6	1886.05	2006.69	5.3306	5.34216	5.20548	4.69526	4.60513	4.68869	NM_009713	chr15:89303125-89303066	Arsa	Mus musculus arylsulfatase A (Arsa), mRNA [NM_009713]	GO:0051597|GO:0045471|GO:0006914|GO:0005886|GO:0005615|GO:0005768|GO:0003824|GO:0004098|GO:0005764|GO:0007339|GO:0016787|GO:0008484|GO:0046872|GO:0000299|GO:0043627|GO:0008152|GO:0007417|GO:0031232|GO:0005737|GO:0009268|GO:0001669|GO:0007584|GO:0004065	NM_009713	Mm.620	11883	ENSMUST00000023292	NP737770
A_51_P129260	0.00192314	1.57887	down	483.49	635.178	3.70814	3.04925	480.664	511.538	458.269	669.574	643.291	592.668	3.6082	3.70025	3.81598	3.16529	3.05331	2.92917	BI662359	chr7:140284357-140284298		BI662359 603305916F1 NCI_CGAP_Mam4 Mus musculus cDNA clone IMAGE:5351666 5', mRNA sequence [BI662359]
A_51_P406020	5.78429e-05	2.42466	down	10624.5	9083.39	8.1663	6.88852	10817.2	10998.7	10057.7	9429.35	9014.55	8806.28	8.10035	8.1266	8.27194	6.98113	6.86202	6.8224	NM_134076	chr14:54888753-54888812	Abhd4	Mus musculus abhydrolase domain containing 4 (Abhd4), mRNA [NM_134076]	GO:0016042|GO:0016787	NM_134076	Mm.28771	105501	ENSMUST00000041197	TC1574500
A_51_P375543	8.34461e-05	3.18958	down	1073.01	699.549	4.85967	3.1863	1082.81	1073.74	1062.47	628.221	721.39	749.034	4.77989	4.76999	5.02913	3.07331	3.21862	3.26697	NM_010848	chr10:20845022-20844963	Myb	Mus musculus myeloblastosis oncogene (Myb), mRNA [NM_010848]	GO:0006816|GO:0010468|GO:0005515|GO:0003700|GO:0006350|GO:0001701|GO:0006355|GO:0045449|GO:0030528|GO:0048566|GO:0005634|GO:0003677|GO:0000082	NM_010848	Mm.52109	17863	ENSMUST00000020156	TC1596978
A_52_P360076	0.0384462	1.73231	down	44.4261	52.6508	0.247927	-0.544772	40.1139	38.6488	54.5157	55.0034	47.7473	55.2016	0.0253463	-0.0260916	0.744527	-0.440364	-0.698673	-0.495278	AK043262	chr2:112112009-112112068	E330013P08Rik	Mus musculus 7 days neonate cerebellum cDNA, RIKEN full-length enriched library, clone:A730077H03 product:unclassifiable, full insert sequence. [AK043262]	GO:0008150|GO:0003674|GO:0005575		Mm.447184	320870
A_51_P196590	0.00140338	2.70473	down	13912.5	10334.9	8.50898	7.07349	16425.2	16064.3	9248.07	9613.97	10605	10785.8	8.70294	8.67313	8.15086	7.0091	7.09644	7.11493	NM_008212	chr3:130936948-130936889	Hadh	Mus musculus hydroxyacyl-Coenzyme A dehydrogenase (Hadh), nuclear gene encoding mitochondrial protein, mRNA [NM_008212]	GO:0014823|GO:0005515|GO:0005488|GO:0005739|GO:0016491|GO:0032868|GO:0003824|GO:0003857|GO:0005743|GO:0042493|GO:0006629|GO:0046676|GO:0050662|GO:0006631|GO:0008152|GO:0055114	NM_008212	Mm.260164	15107	ENSMUST00000029610	TC1747689
A_51_P341285	0.000346105	1.7409	down	1467.98	1750.38	5.31112	4.51129	1510.09	1491.99	1401.85	1614.75	1829.06	1807.34	5.25974	5.24458	5.42904	4.43528	4.56087	4.53774	NM_018888	chr2:155672875-155672816	Uqcc	Mus musculus ubiquinol-cytochrome c reductase complex chaperone, CBP3 homolog (yeast) (Uqcc), nuclear gene encoding mitochondrial protein, transcript variant 1, mRNA [NM_018888]	GO:0031410|GO:0005515|GO:0008150|GO:0005739|GO:0016023	NM_018888	Mm.158827	56046	ENSMUST00000088667	TC1572656
A_51_P214302	0.0968751	1.86498	down	88.0472	98.9456	1.21842	0.319264	65.7709	86.1788	112.192	133.381	70.5225	92.9331	0.738695	1.13082	1.78575	0.837596	-0.136009	0.256205	NM_007967	chr2:74494298-74494239	Evx2	Mus musculus even skipped homeotic gene 2 homolog (Evx2), mRNA [NM_007967]	GO:0030528|GO:0005634|GO:0043565|GO:0003700|GO:0003674|GO:0007275|GO:0003677|GO:0035108|GO:0006355|GO:0005575|GO:0045449	NM_007967	Mm.25365	14029	ENSMUST00000111990	TC1627519
A_52_P316405	0.00134776	1.81645	down	7276.48	8177.93	7.59844	6.73731	8661.35	7549.97	5618.14	8403.68	8115.84	8014.28	7.77969	7.58381	7.4318	6.81499	6.7105	6.68644	NM_001081108	chr5:138700431-138700490	0910001L09Rik	Mus musculus RIKEN cDNA 0910001L09 gene (0910001L09Rik), mRNA [NM_001081108]	GO:0008150|GO:0003674|GO:0005575	NM_001081108	Mm.206901	66096	ENSMUST00000062067	TC1628559
A_51_P291764	0.000406166	2.84538	down	5508.48	4013.75	7.21799	5.70937	5523.18	5173.44	5828.82	3769.46	4082.49	4189.31	7.1306	7.03847	7.48491	5.65833	5.71921	5.75058	NM_177038	chr18:20976198-20976139	D030074E01Rik	Mus musculus RIKEN cDNA D030074E01 gene (D030074E01Rik), transcript variant 1, mRNA [NM_177038]	GO:0008150|GO:0003674|GO:0005575	NM_177038	Mm.273769	75964	ENSMUST00000025177	TC1615075
A_51_P499561	0.0274792	2.03309	down	698.53	700.75	4.21105	3.18737	632.78	563.323	899.488	623.212	770.93	708.109	4.00488	3.83938	4.78889	3.06177	3.31444	3.18591	NM_172592	chr13:104531883-104531824	Sfrs12	Mus musculus splicing factor, arginine/serine-rich 12 (Sfrs12), mRNA [NM_172592]	GO:0003676|GO:0005634|GO:0008150|GO:0003674|GO:0005681|GO:0008380|GO:0006397|GO:0000166|GO:0005575	NM_172592	Mm.458176	218543	ENSMUST00000074616	TC1578900
A_52_P70216	6.23947e-06	2.35292	down	1083.45	951.723	4.86815	3.6337	1098.19	1190.56	961.613	909.639	984.461	961.069	4.80023	4.91899	4.88524	3.60734	3.66717	3.62658	NM_001099319	chr4:126806568-126806627	Gm12942	Mus musculus predicted gene 12942 (Gm12942), mRNA [NM_001099319]	GO:0008150|GO:0003674|GO:0005575	NM_001099319	Mm.392655	100039968	ENSMUST00000106097	TC1600485
A_51_P267024	0.000123375	1.73633	down	8438.17	10033.6	7.82841	7.03237	9373.57	8519.47	7421.48	10247.7	10072.5	9780.59	7.8937	7.75811	7.83342	7.1012	7.02212	6.97379	NM_008776	chr7:26080250-26080191	Pafah1b3	Mus musculus platelet-activating factor acetylhydrolase, isoform 1b, subunit 3 (Pafah1b3), mRNA [NM_008776]	GO:0016042|GO:0005515|GO:0016787|GO:0003847|GO:0005737|GO:0007283	NM_008776	Mm.597	18476	ENSMUST00000005583	TC1725533
A_51_P476725	0.0163601	1.57352	down	147.585	194.991	1.9966	1.3426	145.237	142.056	155.46	213.805	195.882	175.286	1.88158	1.85188	2.25633	1.51834	1.33782	1.17165	AK017625	chr10:127932373-127932432	Myl6b	Mus musculus 8 days embryo whole body cDNA, RIKEN full-length enriched library, clone:5730437E04 product:unclassifiable, full insert sequence. [AK017625]	GO:0008307|GO:0030049|GO:0007519|GO:0016459|GO:0016461|GO:0003774|GO:0006936|GO:0005509		Mm.291688	216459		TC1603270
A_52_P485939	0.00135538	2.74112	down	2133.48	1639.66	5.85101	4.39625	2174.98	2145.15	2080.3	1247.29	1799.9	1871.79	5.7861	5.76842	5.9985	4.06277	4.53768	4.58828	NM_026228	chr3:135551169-135551228	Slc39a8	Mus musculus solute carrier family 39 (metal ion transporter), member 8 (Slc39a8), transcript variant 3, mRNA [NM_026228]	GO:0030001|GO:0016020|GO:0055085|GO:0006811|GO:0046873|GO:0016021|GO:0006829|GO:0006810	NM_026228	Mm.30239	67547	ENSMUST00000081978	TC1576424
A_52_P608156	0.00228437	2.45344	down	78.3908	65.5606	1.05781	-0.236991	82.1291	94.1609	58.8824	72.8786	69.5949	54.2084	1.05914	1.25861	0.855691	-0.0343905	-0.15511	-0.521472	NM_028785	chr19:25197706-25201591	Dock8	Mus musculus dedicator of cytokinesis 8 (Dock8), mRNA [NM_028785]	GO:0008150|GO:0003674|GO:0005085|GO:0005575	NM_028785	Mm.102485	76088	ENSMUST00000025831	TC1591148
A_51_P217906	0.0115006	2.29821	down	3646.72	3241.16	6.59113	5.39062	4589.01	2698.21	3652.92	2702.27	3679.78	3341.43	6.86328	6.09935	6.81076	5.17814	5.56938	5.42434	BC005432	chr1:133571935-133571994	Ctse	Mus musculus cathepsin E, mRNA (cDNA clone MGC:5924 IMAGE:3601519), complete cds. [BC005432]	GO:0006508|GO:0016787|GO:0019031|GO:0004190|GO:0019886|GO:0008233|GO:0005768|GO:0042803		Mm.230249	13034		TC1576142
A_51_P247955	0.0014954	2.0266	down	4290.63	4410.76	6.85901	5.83995	4341.53	4183.13	4347.23	3853.01	4487.13	4892.14	6.78331	6.73193	7.06181	5.68996	5.85556	5.97433	NM_007839	chr5:52541472-52541448	Dhx15	Mus musculus DEAH (Asp-Glu-Ala-His) box polypeptide 15 (Dhx15), transcript variant 2, mRNA [NM_007839]	GO:0004386|GO:0003676|GO:0008026|GO:0005634|GO:0016787|GO:0005524|GO:0008380|GO:0017111|GO:0006397|GO:0000166	NM_007839	Mm.993	13204	ENSMUST00000031061	TC1573400
A_52_P78922	0.0366344	2.59689	down	416.841	312.262	3.4033	2.02651	314.026	298.249	638.249	305.445	314.239	317.103	2.99406	2.92193	4.2939	2.03296	2.0197	2.02689	NM_001163013	chr18:45048728-45048787	Ythdc2	Mus musculus YTH domain containing 2 (Ythdc2), mRNA [NM_001163013]	GO:0004386|GO:0003676|GO:0008026|GO:0016787|GO:0008150|GO:0003674|GO:0005524|GO:0000166|GO:0005575	NM_001163013	Mm.244482	240255	ENSMUST00000037763	TC1597189
A_51_P458781	1.34883e-05	4.30111	down	8725.26	4200.74	7.87638	5.77167	8707.74	9774.06	7693.99	3741	4313.07	4548.14	7.7874	7.9563	7.88544	5.6474	5.79848	5.86914	NM_008278	chr8:58799040-58799099	Hpgd	Mus musculus hydroxyprostaglandin dehydrogenase 15 (NAD) (Hpgd), mRNA [NM_008278]	GO:0006629|GO:0008152|GO:0006631|GO:0005737|GO:0005488|GO:0016491|GO:0016404|GO:0006693|GO:0003824|GO:0055114	NM_008278	Mm.18832	15446		TC1576847
A_51_P353134	0.000836994	4.59917	down	141.367	64.3674	1.91595	-0.285423	152.004	161.857	110.24	68.3243	46.4574	78.3205	1.94729	2.04014	1.76043	-0.127487	-0.738184	0.0094018	AK012219	chr14:73728396-73728455	2700008E08Rik	Mus musculus 11 days embryo whole body cDNA, RIKEN full-length enriched library, clone:2700008E08 product:unclassifiable, full insert sequence. [AK012219]	GO:0008150|GO:0003674|GO:0005575			72539
A_52_P498219	0.0012239	5.34891	down	205.867	79.0685	2.45348	0.0342399	176.897	179.504	261.2	65.815	84.7958	86.5946	2.16608	2.18943	3.00494	-0.18147	0.1299	0.15429	NM_181273	chrX:93726574-93726633	Heph	Mus musculus hephaestin (Heph), transcript variant 2, mRNA [NM_181273]	GO:0046872|GO:0016020|GO:0006825|GO:0030218|GO:0006811|GO:0016491|GO:0016021|GO:0006826|GO:0006810|GO:0005507|GO:0055114	NM_181273	Mm.277092	15203	ENSMUST00000079322	TC1583790
A_52_P303407	0.000852299	1.73333	down	668.977	796.381	4.16676	3.37322	773.409	664.711	568.812	715.464	815.452	858.226	4.29441	4.07814	4.12774	3.26092	3.39543	3.4633		chr5:123618333-123618392		Q5JK17_ORYSA (Q5JK17) Transcription factor ICE1-like, partial (5%) [TC1624228]						TC1624228
A_51_P118103	6.08543e-05	2.38139	down	259.766	225.37	2.80606	1.55425	275.556	279.845	223.897	239.641	210.771	225.698	2.80552	2.83004	2.78262	1.68292	1.44351	1.53633	NM_024203	chr17:15569954-15570013	Fam120b	Mus musculus family with sequence similarity 120, member B (Fam120b), transcript variant 1, mRNA [NM_024203]	GO:0005634|GO:0006350|GO:0030154|GO:0045449	NM_024203	Mm.35039	67544	ENSMUST00000055352	TC1597434
A_51_P195849	0.00286889	1.61532	down	39.8131	50.6015	0.0878021	-0.604016	45.1602	43.2916	30.9874	44.9886	51.5489	55.2668	0.196299	0.137573	-0.0704651	-0.730326	-0.58815	-0.493574	NM_010899	chr2:168305400-168305341	Nfatc2	Mus musculus nuclear factor of activated T-cells, cytoplasmic, calcineurin-dependent 2 (Nfatc2), transcript variant 1, mRNA [NM_010899]	GO:0005515|GO:0003700|GO:0006350|GO:0045944|GO:0006355|GO:0045449|GO:0001816|GO:0005634|GO:0016563|GO:0043565|GO:0005829|GO:0003677|GO:0045941|GO:0005737	NM_010899	Mm.116802	18019	ENSMUST00000099068	NP047699
A_51_P309084	0.00660422	1.67129	down	43.1113	53.4194	0.207883	-0.533079	49.4481	44.7137	35.172	49.5296	63.4975	47.2312	0.32716	0.184204	0.112284	-0.591594	-0.287393	-0.720249	NM_001014900	chr4:119122924-119122983	Zmynd12	Mus musculus zinc finger, MYND domain containing 12 (Zmynd12), mRNA [NM_001014900]	GO:0046872|GO:0008150|GO:0003674|GO:0005575	NM_001014900	Mm.388911	332934	ENSMUST00000094819	TC1591470
A_52_P303841	0.0149207	1.78779	down	125.81	146.392	1.76219	0.924008	117.969	118.301	141.16	123.491	162.361	153.325	1.58158	1.58787	2.11712	0.726449	1.06704	0.97853	XM_986220	chr5:66153780-66153721	Gm5296	PREDICTED: Mus musculus hypothetical LOC384261 (LOC384261), mRNA [XM_986220]	GO:0008150|GO:0003674|GO:0005575	XM_986220	Mm.396194	384261		TC1664817
A_52_P354123	0.00168419	1.77707	down	143.335	167.007	1.9437	1.1142	152.919	158.642	118.443	141.848	187.69	171.484	1.95594	2.01119	1.86398	0.926386	1.27619	1.14002	NM_026967	chr15:98708401-98708342	Rhebl1	Mus musculus Ras homolog enriched in brain like 1 (Rhebl1), mRNA [NM_026967]	GO:0016020|GO:0008150|GO:0003674|GO:0007264|GO:0005886|GO:0005525|GO:0005737|GO:0000166|GO:0007165|GO:0005575|GO:0003924|GO:0005622	NM_026967	Mm.259708	69159	ENSMUST00000024518	TC1584548
A_51_P116687	0.0345173	1.76648	down	398.969	462.05	3.41253	2.59165	336.891	366.529	493.486	472.921	464.311	448.917	3.09545	3.21934	3.92279	2.66364	2.58293	2.52839	NM_025851	chr17:9200968-9201027	1700010I14Rik	Mus musculus RIKEN cDNA 1700010I14 gene (1700010I14Rik), mRNA [NM_025851]	GO:0008150|GO:0003674|GO:0005575	NM_025851	Mm.67591	66931	ENSMUST00000151609	TC1634590
A_52_P877156	0.0554957	2.06605	down	96.2018	93.9338	1.32374	0.276863	61.2702	114.387	112.948	112.218	77.2279	92.356	0.636431	1.53934	1.79544	0.588341	-0.00497055	0.247217	CJ236955	chr4:137438623-137438564		CJ236955 RIKEN full-length enriched mouse cDNA library, pooled tissue 10 Mus musculus cDNA clone K630152J12 3', mRNA sequence [CJ236955]			Mm.440542			TC1721480
A_51_P150394	0.000330796	1.74131	down	26483.1	31468.1	9.48083	8.68065	28893.4	26601.1	23954.7	33047.1	31205.5	30151.8	9.51777	9.40076	9.52395	8.79042	8.65349	8.59804	NM_025842	chr15:76452614-76452555	Vps28	Mus musculus vacuolar protein sorting 28 (yeast) (Vps28), mRNA [NM_025842]	GO:0005515|GO:0016020|GO:0008150|GO:0015031|GO:0005886|GO:0005829|GO:0005768|GO:0006810	NM_025842	Mm.30028	66914	ENSMUST00000078803	TC1589569
A_52_P364768	0.00128833	2.50722	down	533.074	431.962	3.82007	2.49398	480.933	689.352	428.938	438.511	411.434	445.939	3.60901	4.13065	3.72055	2.55466	2.4085	2.51879	NM_029545	chr12:53105907-53100843	6530401N04Rik	Mus musculus RIKEN cDNA 6530401N04 gene (6530401N04Rik), mRNA [NM_029545]	GO:0016787|GO:0008150|GO:0003674|GO:0005737|GO:0019478|GO:0005575|GO:0016788	NM_029545	Mm.2821	328092	ENSMUST00000085404	TC1591377
A_51_P491095	7.40359e-06	2.5759	down	624.464	500.336	4.07106	2.70598	698.847	631.577	542.97	478.191	502.738	520.08	4.14815	4.00437	4.06065	2.67963	2.69764	2.74067	NM_028986	chr2:148518159-148518217	Gzf1	Mus musculus GDNF-inducible zinc finger protein 1 (Gzf1), mRNA [NM_028986]	GO:0005634|GO:0046872|GO:0003674|GO:0001658|GO:0000122	NM_028986	Mm.136913	74533	ENSMUST00000028928	TC1576838
A_52_P245316	0.00472922	2.25422	down	49.1067	44.5595	0.389083	-0.783548	38.9189	59.2196	49.1816	42.8809	43.5799	47.2176	-0.0182838	0.58956	0.595973	-0.799549	-0.830431	-0.720663	NM_001033481	chr19:10299945-10299089	Gm98	Mus musculus predicted gene 98 (Gm98), mRNA [NM_001033481]	GO:0003700|GO:0006350|GO:0030154|GO:0045449|GO:0005634|GO:0043565|GO:0016020|GO:0003677|GO:0045893|GO:0022010|GO:0031643|GO:0014003|GO:0016021	NM_001033481	Mm.329716	225908	ENSMUST00000096230	TC1666058
A_51_P357996	0.0105499	4.31729	down	239.117	118.404	2.65929	0.549161	169.845	268.725	278.782	149.305	68.9555	136.951	2.10739	2.77154	3.09892	1.00031	-0.168427	0.815605	NM_013756	chr8:19293364-19293423	Defb3	Mus musculus defensin beta 3 (Defb3), mRNA [NM_013756]	GO:0006952|GO:0005576|GO:0042742	NM_013756	Mm.103651	27358	ENSMUST00000033852	TC1592077
A_51_P387608	0.0141648	2.45522	down	3776.65	3113.37	6.63966	5.34381	3535.17	2879.2	4915.59	2994.3	3180.53	3165.28	6.48688	6.19301	7.23907	5.32619	5.35903	5.3462	NM_010431	chr12:75047269-75047329	Hif1a	Mus musculus hypoxia inducible factor 1, alpha subunit (Hif1a), mRNA [NM_010431]	GO:0045926|GO:0051216|GO:0046982|GO:0006350|GO:0003704|GO:0030154|GO:0035162|GO:0001525|GO:0014850|GO:0045449|GO:0001892|GO:0005667|GO:0005634|GO:0046716|GO:0042593|GO:0009434|GO:0003677|GO:0006879|GO:0050790|GO:0001755|GO:0008284|GO:0042541|GO:0003700|GO:0045944|GO:0045648|GO:0042981|GO:0001947|GO:0043619|GO:0006355|GO:0007165|GO:0030528|GO:0043565|GO:0048661|GO:0001666|GO:0030949|GO:0005737|GO:…	NM_010431	Mm.3879	15251	ENSMUST00000021530	TC1586854
A_52_P326557	0.000131326	3.28833	down	70.2234	44.4311	0.92496	-0.792396	67.4745	74.1814	69.0142	40.1468	43.2174	49.9291	0.775589	0.914544	1.08475	-0.894602	-0.842481	-0.640107	NM_181751	chrX:46026647-46026588	Gpr119	Mus musculus G-protein codownled receptor 119 (Gpr119), mRNA [NM_181751]	GO:0008289|GO:0004872|GO:0016020|GO:0004930|GO:0005886|GO:0030073|GO:0007186|GO:0004871|GO:0016021|GO:0007165|GO:0001619	NM_181751	Mm.269129	236781	ENSMUST00000053970	TC1596741
A_51_P351828	2.2668e-05	2.88242	down	200.582	144.145	2.43586	0.908578	199.766	220.287	181.694	132.322	154.288	145.825	2.34149	2.4848	2.48129	0.826094	0.993465	0.906176	NM_147075	chr7:111766660-111766719	Olfr656	Mus musculus olfactory receptor 656 (Olfr656), mRNA [NM_147075]	GO:0004872|GO:0004984|GO:0004930|GO:0007608|GO:0007186|GO:0004871|GO:0016021|GO:0007165	NM_147075	Mm.377826	259078	ENSMUST00000098172	TC1599574
A_52_P396042	0.00341231	1.61317	down	142.585	183.345	1.94283	1.25292	146.271	154.876	126.607	206.572	172.138	171.327	1.89181	1.97652	1.96014	1.46868	1.1514	1.13869	NM_011597	chr19:24209398-24207198	Tjp2	Mus musculus tight junction protein 2 (Tjp2), mRNA [NM_011597]	GO:0005923|GO:0005634|GO:0005515|GO:0016020|GO:0030054|GO:0008022|GO:0005886|GO:0005921	NM_011597	Mm.104744	21873	ENSMUST00000099558	TC1633832
A_51_P465292	0.00015727	3.10274	down	183.585	120.99	2.2904	0.65686	221.318	185.561	143.876	121.95	112.853	128.167	2.48929	2.23731	2.14461	0.708329	0.542281	0.71997	NM_080462	chr2:23858915-23858856	Hnmt	Mus musculus histamine N-methyltransferase (Hnmt), mRNA [NM_080462]	GO:0046539|GO:0001505|GO:0016740|GO:0008170|GO:0008168|GO:0005737|GO:0019717|GO:0005575	NM_080462	Mm.33120	140483	ENSMUST00000114498	TC1581113
A_52_P546090	1.46231e-05	1.83229	down	18277.3	20572.7	8.942	8.06836	20300.2	18789.2	15742.5	20178.7	20582	20957.5	9.00853	8.89917	8.9183	8.07873	8.05307	8.07326	NM_009279	chrX:71035700-71035759	Ssr4	Mus musculus signal sequence receptor, delta (Ssr4), transcript variant 2, mRNA [NM_009279]	GO:0004872|GO:0016020|GO:0008150|GO:0005784|GO:0003674|GO:0016021|GO:0005783	NM_009279	Mm.831	20832	ENSMUST00000002090	TC1650816
A_51_P170946	0.019126	1.57461	down	12055.8	15847.5	8.34547	7.69047	11336.5	11447.2	13383.8	14889.1	16687.4	15966.1	8.16801	8.18427	8.68412	7.64016	7.75045	7.6808	NM_029804	chr17:33783311-33783252	Hnrnpm	Mus musculus heterogeneous nuclear ribonucleoprotein M (Hnrnpm), transcript variant 1, mRNA [NM_029804]	GO:0003676|GO:0005634|GO:0008150|GO:0003674|GO:0005681|GO:0008380|GO:0003723|GO:0030529|GO:0006397|GO:0000166|GO:0005575	NM_029804	Mm.311439	76936	ENSMUST00000087582	TC1660250
A_52_P62444	0.000360179	3.64678	down	463.22	258.43	3.61523	1.74861	566.724	485.051	337.885	273.867	228.352	273.07	3.84582	3.62355	3.37632	1.87552	1.5591	1.81121	NM_013681	chr6:115226390-115226449	Syn2	Mus musculus synapsin II (Syn2), transcript variant IIb, mRNA [NM_013681]	GO:0030672|GO:0030054|GO:0005524|GO:0045202|GO:0007269|GO:0046983|GO:0008021|GO:0003824	NM_013681	Mm.441431	20965		TC1578866
A_52_P231729	4.16712e-05	5.22247	down	10363.4	4133.72	8.13136	5.74663	10529.7	10212.3	10348	3621.32	4577.06	4202.77	8.0615	8.01958	8.313	5.60049	5.88418	5.75521	NM_010390	chr17:35461951-35462010	H2-Q1	Mus musculus histocompatibility 2, Q region locus 1 (H2-Q1), mRNA [NM_010390]	GO:0002474|GO:0016020|GO:0042612|GO:0016021	NM_010390	Mm.466882	15006	ENSMUST00000073208	TC1613506
A_52_P548981	0.000475651	1.88093	down	530.599	585.921	3.84223	2.93079	521.951	563.913	505.933	526.956	608.121	622.687	3.72709	3.84089	3.95873	2.81972	2.9722	3.00045		chr2:3244697-3244638
A_52_P308863	0.000617625	2.70833	down	1584.69	1210.54	5.41871	3.9813	1642.05	1431.68	1680.34	1182.03	1231.68	1217.91	5.3806	5.18506	5.69047	3.98524	3.99039	3.96828	NM_025926	chr3:151847306-151847247	Dnajb4	Mus musculus DnaJ (Hsp40) homolog, subfamily B, member 4 (Dnajb4), mRNA [NM_025926]	GO:0008150|GO:0003674|GO:0051082|GO:0006457|GO:0005575|GO:0031072	NM_025926	Mm.46746	67035	ENSMUST00000144950	TC1576128
A_51_P196127	0.000303956	2.84056	down	14036.5	10275.7	8.56836	7.06219	14408.2	13382.3	14319	9111.34	10804.1	10911.6	8.51392	8.4096	8.78157	6.93163	7.12327	7.13165	NM_011863	chr3:131306415-131306474	Papss1	Mus musculus 3'-phosphoadenosine 5'-phosphosulfate synthase 1 (Papss1), mRNA [NM_011863]	GO:0016772|GO:0005524|GO:0016779|GO:0016740|GO:0050428|GO:0016301|GO:0004781|GO:0000103|GO:0009336|GO:0004020|GO:0000166|GO:0003824	NM_011863	Mm.244912	23971	ENSMUST00000029666	TC1572073
A_51_P417701	0.0287815	1.58591	down	571.758	744.273	3.94364	3.27833	523.326	534.047	657.901	699.176	756.262	777.379	3.73088	3.76238	4.33765	3.2277	3.28672	3.32056	NM_001042558	chr10:90452639-90452580	Apaf1	Mus musculus apoptotic peptidase activating factor 1 (Apaf1), transcript variant 1, mRNA [NM_001042558]	GO:0005515|GO:0007275|GO:0005524|GO:0016505|GO:0042802|GO:0007420|GO:0006309|GO:0051402|GO:0042981|GO:0006917|GO:0030900|GO:0000166|GO:0001843|GO:0006952|GO:0005634|GO:0005829|GO:0006919|GO:0005737|GO:0006915|GO:0005625|GO:0005622	NM_001042558	Mm.220289	11783	ENSMUST00000020157	NP1490041
A_52_P292959	0.000933676	2.7906	down	1506.58	1116.81	5.34503	3.86445	1466.21	1387.15	1666.38	1064.58	1144.6	1141.26	5.2172	5.13947	5.67842	3.83426	3.88461	3.87449	NM_009289	chr19:47717470-47717529	Slk	Mus musculus STE20-like kinase (yeast) (Slk), transcript variant 1, mRNA [NM_009289]	GO:0004672|GO:0005515|GO:0005524|GO:0016740|GO:0006289|GO:0004518|GO:0000166|GO:0046777|GO:0004674|GO:0003677|GO:0006468|GO:0016301|GO:0005737|GO:0006915	NM_009289	Mm.281011	20874	ENSMUST00000026043	TC1575835
A_52_P214956	0.0131197	1.74413	down	41.7911	49.3608	0.165419	-0.637088	47.5635	34.8083	43.0014	50.5058	52.1375	45.4391	0.271101	-0.177082	0.402239	-0.563437	-0.571771	-0.776055	NM_172414	chr12:86638221-86638280	Fam164c	Mus musculus family with sequence similarity 164, member C (Fam164c), mRNA [NM_172414]	GO:0008150|GO:0003674|GO:0005575	NM_172414	Mm.158810	72350	ENSMUST00000059341	TC1584971
A_51_P496779	0.00198523	4.50364	down	195.597	88.5781	2.37463	0.203543	164.399	168.976	253.416	78.1864	95.8354	91.7125	2.06037	2.10223	2.96129	0.0670309	0.306466	0.237131	NM_194462	chr5:3956248-3956307	Akap9	Mus musculus A kinase (PRKA) anchor protein (yotiao) 9 (Akap9), mRNA [NM_194462]	GO:0005515|GO:0008150|GO:0016301|GO:0005737|GO:0000242	NM_194462	Mm.46044	100986	ENSMUST00000143365	TC1693669
A_52_P232453	0.00827336	1.69227	down	303.05	372.374	3.03219	2.27322	274.75	324.294	310.107	320.991	389.407	406.723	2.80129	3.04271	3.25255	2.10457	2.32911	2.38599	NM_153591	chr7:104211359-104211418	Nars2	Mus musculus asparaginyl-tRNA synthetase 2 (mitochondrial)(putative) (Nars2), nuclear gene encoding mitochondrial protein, mRNA [NM_153591]	GO:0003676|GO:0008150|GO:0005524|GO:0005739|GO:0000166|GO:0004812|GO:0004815|GO:0006422|GO:0003674|GO:0006412|GO:0005737|GO:0006421|GO:0004816|GO:0006418|GO:0016874	NM_153591	Mm.274864	244141	ENSMUST00000044466	TC1578660
A_51_P351562	0.001862	2.10857	down	475.965	468.183	3.68474	2.60848	441.553	480.795	505.548	430.125	480.851	493.573	3.48576	3.61084	3.95763	2.5268	2.63343	2.6652	NM_029368	chr1:44145365-44144879	1700029F09Rik	Mus musculus RIKEN cDNA 1700029F09 gene (1700029F09Rik), mRNA [NM_029368]	GO:0008150|GO:0003674|GO:0005575	NM_029368	Mm.281714	75623	ENSMUST00000127923	TC1606821
A_52_P619911	0.000128437	2.07462	down	946.219	946.573	4.67692	3.62407	993.785	951.585	893.288	882.139	1020.32	937.261	4.65611	4.59575	4.77891	3.56305	3.71879	3.59039	NM_172826	chr17:14332341-14332282	Dact2	Mus musculus dapper homolog 2, antagonist of beta-catenin (xenopus) (Dact2), mRNA [NM_172826]	GO:0008150|GO:0003674|GO:0005739|GO:0005575	NM_172826	Mm.79993	240025		TC1583062
A_51_P475501	0.0994633	3.3394	down	2463.69	1959.51	6.05581	4.31622	2261.43	2477.14	2652.51	490.947	2790.41	2597.17	5.84234	5.97602	6.34907	2.71761	5.17024	5.06081	NM_026703	chr2:35891930-35891871	Ndufa8	Mus musculus NADH dehydrogenase (ubiquinone) 1 alpha subcomplex, 8 (Ndufa8), nuclear gene encoding mitochondrial protein, mRNA [NM_026703]	GO:0008150|GO:0003674|GO:0070469|GO:0005739|GO:0022900|GO:0006810|GO:0005743	NM_026703	Mm.19834	68375	ENSMUST00000070112	TC1772210
A_51_P442284	0.000563048	2.19064	down	670.557	623.32	4.1551	3.02374	803.349	702.794	505.528	610.632	626.043	633.284	4.3492	4.15852	3.95757	3.03235	3.0141	3.02479	NM_013888	chr10:62871211-62871270	Dnajc12	Mus musculus DnaJ (Hsp40) homolog, subfamily C, member 12 (Dnajc12), mRNA [NM_013888]	GO:0008150|GO:0003674|GO:0005575|GO:0031072	NM_013888	Mm.32550	30045	ENSMUST00000043317	TC1594927
A_52_P241742	0.000971727	2.29144	down	1455.11	1289.89	5.26704	4.07078	1750.07	1559.13	1056.14	1187.83	1346.79	1335.06	5.47252	5.30808	5.02051	3.9923	4.11928	4.10078	AK008077	chr4:40217157-40217216		RIKEN cDNA 2010003O02 gene Gene [Source:MGI Symbol;Acc:MGI:1913684] [ENSMUST00000030114]			Mm.392019		ENSMUST00000030114	TC1584649
A_51_P436447	0.0172354	1.61655	down	41.7941	54.1583	0.176965	-0.515951	40.5241	41.5804	43.2777	43.514	60.1829	58.7782	0.0400252	0.079391	0.411478	-0.778408	-0.364739	-0.404707	NM_172458	chr17:32910688-32910629	Zfp871	Mus musculus zinc finger protein 871 (Zfp871), mRNA [NM_172458]	GO:0046872|GO:0008150|GO:0003674|GO:0005575	NM_172458	Mm.38813	208292	ENSMUST00000057501	TC1578348
A_51_P325343	0.000327887	1.6609	down	2514.52	3135.49	6.08646	5.35449	2686.96	2479.74	2376.86	3116.76	3112.19	3177.51	6.09108	5.97753	6.19077	5.38401	5.3277	5.35177	NM_011951	chr17:28885015-28885074	Mapk14	Mus musculus mitogen-activated protein kinase 14 (Mapk14), transcript variant 1, mRNA [NM_011951]	GO:0004672|GO:0019395|GO:0004707|GO:0005524|GO:0031663|GO:0001525|GO:0000166|GO:0005623|GO:0005634|GO:0046777|GO:0032495|GO:0005829|GO:0006468|GO:0016301|GO:0005515|GO:0007243|GO:0006950|GO:0016740|GO:0000902|GO:0045944|GO:0045648|GO:0044445|GO:0002062|GO:0000077|GO:0006006|GO:0004674|GO:0007519|GO:0008022|GO:0000922|GO:0005737|GO:0051403|GO:0032496|GO:0008339|GO:0005625	NM_011951	Mm.311337	26416	ENSMUST00000114754	TC1574215
A_51_P430900	0.00338496	2.79679	down	2398.67	1754.62	5.99923	4.51546	1846.48	2693.62	2655.92	1642.79	1832.17	1788.9	5.54988	6.09689	6.35092	4.46012	4.56332	4.52294	NM_013642	chr17:26642536-26642526	Dusp1	Mus musculus dual specificity phosphatase 1 (Dusp1), mRNA [NM_013642]	GO:0008138|GO:0007049|GO:0008330|GO:0016311|GO:0043065|GO:0005634|GO:0016787|GO:0004721|GO:0004725|GO:0016791|GO:0045768|GO:0005625|GO:0006470|GO:0017017	NM_013642	Mm.239041	19252	ENSMUST00000025025	TC1574874
A_51_P330615	0.000376723	2.48941	down	594.521	492.375	3.99823	2.68242	693.342	536.648	553.573	466.374	516.875	493.876	4.13674	3.76939	4.08856	2.64353	2.73765	2.66609	NM_146249	chr17:56078099-56078040	BC031441	Mus musculus cDNA sequence BC031441 (BC031441), mRNA [NM_146249]	GO:0046872|GO:0008150|GO:0003674|GO:0005575	NM_146249	Mm.441018	240120	ENSMUST00000056147	TC1588718
A_52_P681488	0.000661848	1.96808	down	506.159	525.239	3.75207	2.77528	572.165	563.206	383.106	490.323	542.274	543.121	3.85961	3.83908	3.55753	2.71577	2.80686	2.80321	NM_026343	chr4:48199141-48199200	Stx17	Mus musculus syntaxin 17 (Stx17), mRNA [NM_026343]	GO:0006886|GO:0005515|GO:0016192|GO:0016020|GO:0008150|GO:0003674|GO:0030868|GO:0005484|GO:0016021|GO:0006810|GO:0005783	NM_026343	Mm.171334	67727	ENSMUST00000107720	TC1607510
A_52_P644790	0.000111552	3.32731	down	120.484	75.0621	1.70145	-0.0329043	132.53	115.061	113.86	81.0726	74.8898	69.2239	1.7495	1.54781	1.80705	0.119328	-0.0493226	-0.168718	AK083675	chr17:32202739-32202798	Rrp1b	Mus musculus 9 days embryo whole body cDNA, RIKEN full-length enriched library, clone:D030064A17 product:hypothetical protein, full insert sequence. [AK083675]	GO:0005634|GO:0008150|GO:0003674|GO:0030688|GO:0006364|GO:0005575		Mm.102761	72462
A_52_P36680	0.00454297	2.25911	down	66.7117	62.47	0.851179	-0.324574	66.3954	69.8384	63.9015	45.6328	72.6902	69.0869	0.752328	0.827506	0.973704	-0.709814	-0.0923319	-0.171576	NM_172627	chr18:46400375-46400316	Pggt1b	Mus musculus protein geranylgeranyltransferase type I, beta subunit (Pggt1b), mRNA [NM_172627]	GO:0034097|GO:0005515|GO:0042277|GO:0016740|GO:0051774|GO:0051789|GO:0003824|GO:0004659|GO:0019840|GO:0046872|GO:0005953|GO:0004662|GO:0008270|GO:0045787|GO:0008144|GO:0008284	NM_172627	Mm.262096	225467	ENSMUST00000025354	TC1579819
A_51_P464791	0.0238341	2.42498	down	1942.47	1607.66	5.66508	4.3871	1688.76	1454.77	2683.9	1449.88	1713.6	1659.5	5.42106	5.20813	6.36604	4.2799	4.4668	4.41462	NM_001042671	chr2:132355464-132355405	Gpcpd1	Mus musculus glycerophosphocholine phosphodiesterase GDE1 homolog (S. cerevisiae) (Gpcpd1), transcript variant 3, mRNA [NM_001042671]	GO:0030246|GO:0006629|GO:0016787|GO:0006071|GO:0008081|GO:0008889|GO:0005975|GO:0003824	NM_001042671	Mm.211211	74182	ENSMUST00000110142	TC1586411
A_51_P189594	0.00351948	2.97711	down	1082.46	746.071	4.85487	3.28096	948.853	970.828	1327.69	740.181	800.388	697.644	4.58936	4.62463	5.35063	3.30992	3.36853	3.16443	NM_029001	chr13:109074294-109074353	Elovl7	Mus musculus ELOVL family member 7, elongation of long chain fatty acids (yeast) (Elovl7), mRNA [NM_029001]	GO:0008610|GO:0016020|GO:0008150|GO:0003674|GO:0006633|GO:0016021|GO:0005575|GO:0005783	NM_029001	Mm.286127	74559		TC1579539
A_52_P346438	8.24317e-05	3.03651	down	1467.02	1002.07	5.31093	3.70852	1461.91	1472.22	1466.92	1016.78	971.498	1017.95	5.21295	5.22534	5.49451	3.76797	3.64805	3.70953	AK032020	chr4:115486691-115486750	Atpaf1	Mus musculus adult male medulla oblongata cDNA, RIKEN full-length enriched library, clone:6330547J17 product:unclassifiable, full insert sequence. [AK032020]	GO:0008150|GO:0003674|GO:0005739|GO:0005575|GO:0006461		Mm.109600	230649		TC1618660
A_51_P378777	1.87976e-05	2.49259	down	11877.7	9849.8	8.32352	7.00587	13082.7	11817.7	10732.6	10001.8	9759.41	9788.22	8.37469	8.23023	8.36564	7.06615	6.97656	6.97492	NM_029090	chr16:3904663-3904722	Nat15	Mus musculus N-acetyltransferase 15 (GCN5-related, putative) (Nat15), mRNA [NM_029090]	GO:0008150|GO:0003674|GO:0008415|GO:0008152|GO:0016740|GO:0005575|GO:0008080	NM_029090	Mm.479546	74763	ENSMUST00000115860	TC1574721
A_52_P209311	0.000138114	1.87738	down	3430.57	3792.66	6.53469	5.62597	3563.7	3536.82	3191.2	3447.5	3990.62	3939.86	6.49848	6.4898	6.61581	5.52952	5.68638	5.66201	NM_001110310	chrX:98407382-98407323	Snx12	Mus musculus sorting nexin 12 (Snx12), transcript variant 1, mRNA [NM_001110310]	GO:0005515|GO:0008150|GO:0003674|GO:0015031|GO:0035091|GO:0007154|GO:0005575|GO:0006810	NM_001110310	Mm.206949	55988	ENSMUST00000120389	TC1574111
A_51_P256342	0.00323418	2.35487	down	11261	9898.95	8.24461	7.00896	10090.1	10967.5	12725.5	8853.77	10418.8	10424.3	7.99997	8.1225	8.61136	6.89026	7.07088	7.06575	NM_013471	chr6:086687083-086687023	Anxa4	Mus musculus annexin A4 (Anxa4), mRNA [NM_013471]	GO:0005544|GO:0001822|GO:0016324|GO:0005509	NM_013471	Mm.259702	11746	ENSMUST00000001187	TC1574695
A_51_P500152	0.000613309	1.89153	down	837.279	921.34	4.50031	3.58076	856.273	871.342	784.222	797.099	978.716	988.203	4.44124	4.46865	4.59104	3.4168	3.65873	3.66675	NM_145505	chr19:57463701-57463760	Fam160b1	Mus musculus family with sequence similarity 160, member B1 (Fam160b1), mRNA [NM_145505]	GO:0008150|GO:0003674|GO:0005575	NM_145505	Mm.358870	226252		TC1611306
A_52_P796840	0.0565903	1.75968	down	322.805	361.284	3.0394	2.22409	470.61	297.409	200.398	295.31	398.315	390.229	3.57771	2.91786	2.62265	1.98427	2.36174	2.32626	NM_001025575	chr1:141707474-141707415	BC026782	Mus musculus cDNA sequence BC026782 (BC026782), mRNA [NM_001025575]		NM_001025575	Mm.439660	545366	ENSMUST00000094484	TC1585267
A_51_P157472	0.00200757	1.7692	down	4766.03	5595.51	7.01046	6.18736	4841.84	4611.52	4844.73	5113.7	5870.91	5801.93	6.94066	6.87258	7.21813	6.09834	6.24335	6.2204	L35034	chr6:70715770-70715710	Rpia	Mus musculus ribose 5-phosphate isomerase (RPI) mRNA exons 1-6, complete cds. [L35034]	GO:0005792|GO:0048029|GO:0006098|GO:0009052|GO:0004751|GO:0005529|GO:0016853|GO:0019693|GO:0005625		Mm.17905	19895
A_52_P877015	0.000923379	2.83613	down	256.915	187.688	2.79298	1.28905	231.192	259.579	279.975	171.243	190.492	201.329	2.55226	2.72159	3.10508	1.19809	1.29757	1.37149	NM_009380	chr14:18869432-18869491	Thrb	Mus musculus thyroid hormone receptor beta (Thrb), transcript variant 2, mRNA [NM_009380]	GO:0090207|GO:0006350|GO:0009887|GO:0003707|GO:0007605|GO:0008016|GO:0032332|GO:0045449|GO:0005634|GO:0046872|GO:0019216|GO:0004879|GO:0003677|GO:0016481|GO:0008270|GO:0008284|GO:0045778|GO:0005515|GO:0004872|GO:0003700|GO:0045944|GO:0006355|GO:0003690|GO:0042803|GO:0004887|GO:0043565|GO:0008050|GO:0006357|GO:0007621|GO:0000122|GO:0090181|GO:0016564	NM_009380	Mm.477815	21834	ENSMUST00000091471	TC1668793
[truncated: 11,483 more rows]
