# Supplementary material for: Calcium Prevents Tumorigenesis in a Mouse Model of Colorectal Cancer
Source: PLoS One. 2011 Aug 17;6(8):e22566. doi: 10.1371/journal.pone.0022566 (PMC3157344; doi:10.1371/journal.pone.0022566)
Supplement: Table S2 — Complete list of differentially expressed genes in the DMH + Calcium group compared with the DMH group. (XLS) [file pone.0022566.s002.xls]

## Sheet: Sheet1
Table S2.The complete list of differentially expressed genes in the DMH+Calcium group compared with DMH group.
# Fold-Change cut-off : 1.5
# P-value cut-off: 0.05
# Condition pairs: DMH+Calcium_vs_DMH
# Column A: ProbeName, it represents probe name.
# Column B: p-value, p-value calculated from TTest.
# Column C: Fold change, the absolute ratio (no log scale) of normalized intensities between two conditions.
# Column D: Regulation, it depicts which one of the groups has greater or lower intensity values wrt other group.
# Column E,F: Raw Intensity of each group (averaged intensity of replicate samples).
# Column G,H: Normalized Intensity of each group (averaged intensity of replicate samples).
# Column I~Q: Raw Intensity of each sample.
# Column R~Z: log2 value of Normalized Intensity of each sample.
# Column AA~AJ: annotations to each probe, including GenbankAccession, GenomicCoordinates, GeneSymbol, Description, GO annotations, RefSeqAccession, UniGeneID, EntrezGeneID, EnsemblID, TIGRID
#CA-1,2,3 stand for the mice from the DMH+Calcium group without tumors;CA2-1,2,3 stand for the mice from the DMH+Calcium group with tumors.
	P-value Fold change and Regulation			Group--Raw Intensity		Group--Normalized Intensity		Raw Intensity									Normalized Intensity									Annotations
ProbeName	p-value	FCAbsolute	regulation	[Group(DMH+Calcium)](raw)	[Group(DMH)](raw)	[Group(DMH+Calcium)](normalized)	[Group(DMH)](normalized)	[CA-1, Group(DMH+Calcium)](raw)	[CA-2, Group(DMH+Calcium)](raw)	[CA-3, Group(DMH+Calcium)](raw)	[CA2-1, Group(DMH+Calcium)](raw)	[CA2-2, Group(DMH+Calcium)](raw)	[CA2-3, Group(DMH+Calcium)](raw)	[DMH-1, Group(DMH)](raw)	[DMH-2, Group(DMH)](raw)	[DMH-3, Group(DMH)](raw)	[CA-1, Group(DMH+Calcium)](normalized)	[CA-2, Group(DMH+Calcium)](normalized)	[CA-3, Group(DMH+Calcium)](normalized)	[CA2-1, Group(DMH+Calcium)](normalized)	[CA2-2, Group(DMH+Calcium)](normalized)	[CA2-3, Group(DMH+Calcium)](normalized)	[DMH-1, Group(DMH)](normalized)	[DMH-2, Group(DMH)](normalized)	[DMH-3, Group(DMH)](normalized)	GenbankAccession	GenomicCoordinates	GeneSymbol	Description	Go	RefSeqAccession	UniGeneID	EntrezGeneID	EnsemblID	TIGRID
A_52_P258194	0.0331755	1.73901	up	130.101	76.4992	0.778761	-0.0195036	97.1036	129.077	77.6539	129.395	143.295	204.084	93.511	69.2118	66.7747	0.328409	0.791553	0.139906	1.00138	1.39268	1.01864	0.32525	-0.163075	-0.220686	NM_145123	chr19:42358630-42358129	Crtac1	Mus musculus cartilage acidic protein 1 (Crtac1), mRNA [NM_145123]	GO:0005576|GO:0008150|GO:0003674|GO:0005578|GO:0005575|GO:0005509	NM_145123	Mm.313558	72832	ENSMUST00000048630	TC1582416
A_52_P682382	4.59323e-06	3.05361	down	3401.46	10724	5.51608	7.1266	4153.51	3908.67	3518.16	2488.39	2323.36	4016.63	10067.2	10645	11459.7	5.74707	5.71193	5.64153	5.26674	5.41183	5.3174	7.07556	7.10186	7.20237	NM_009127	chr19:44469446-44469387	Scd1	Mus musculus stearoyl-Coenzyme A desaturase 1 (Scd1), mRNA [NM_009127]	GO:0005792|GO:0050830|GO:0004768|GO:0008610|GO:0006633|GO:0044130|GO:0016491|GO:0050872|GO:0034435|GO:0005506|GO:0006629|GO:0016020|GO:0050873|GO:0016717|GO:0016021|GO:0005783|GO:0055114	NM_009127	Mm.267377	20249	ENSMUST00000041331	TC1765950
A_52_P103628	0.0104543	1.72323	down	45606.7	81112.7	9.26247	10.0476	38219.4	33982.1	38626.5	56478.6	43607.7	62725.7	81372.7	82334.8	79630.7	8.94897	8.83196	9.09822	9.77116	9.64213	9.28239	10.0904	10.0532	9.99912		chr3:93330142-93330203
A_51_P496795	0.00906499	1.86272	down	267.901	512.163	1.84286	2.74027	226.452	213.07	188.576	340.19	267.556	371.564	499.918	512.368	524.202	1.55002	1.51466	1.41992	2.39594	2.29353	1.88309	2.74373	2.72502	2.75206	NM_145555	chr4:134926026-134925967	A330049M08Rik	Mus musculus RIKEN cDNA A330049M08 gene (A330049M08Rik), transcript variant 1, mRNA [NM_145555]	GO:0016020|GO:0008150|GO:0003674|GO:0016021|GO:0005575	NM_145555	Mm.35548	230822	ENSMUST00000064481	TC1594739
A_51_P507602	0.0274225	1.55872	down	1007.72	1704	3.78048	4.42084	1005.16	859.723	872.453	1165.09	866.909	1276.97	1098.93	2047.14	1965.94	3.70016	3.5272	3.62985	4.17196	3.98957	3.66413	3.88007	4.72337	4.65909	NM_139148	chr3:144486375-144486316	Clca4	Mus musculus chloride channel calcium activated 4 (Clca4), mRNA [NM_139148]	GO:0008150|GO:0003674|GO:0005575	NM_139148	Mm.290600	229927	ENSMUST00000029931	TC1589381
A_51_P425798	0.0289654	1.56445	up	57.9746	38.9866	-0.335683	-0.981334	51.3102	45.5295	54.4967	65.593	63.6062	67.312	41.7748	41.229	33.956	-0.59187	-0.711801	-0.370984	0.0212126	0.220928	-0.581582	-0.837252	-0.910432	-1.19632	NM_029920	chr5:149125325-149125384	Mtus2	Mus musculus microtubule associated tumor suppressor candidate 2 (Mtus2), mRNA [NM_029920]	GO:0005874|GO:0005856|GO:0005737	NM_029920	Mm.244177	77521	ENSMUST00000085554	TC1584915
A_51_P449777	0.0303944	1.74614	down	1032.29	1855.54	3.78703	4.5912	820.323	769.856	759.308	1374.88	1140.66	1328.72	1614.24	1947.42	2004.95	3.407	3.36792	3.42946	4.41084	4.38549	3.72145	4.43483	4.65133	4.68744	NM_022995	chr2:173050486-173050427	Pmepa1	Mus musculus prostate transmembrane protein, androgen induced 1 (Pmepa1), mRNA [NM_022995]	GO:0005515|GO:0016020|GO:0008150|GO:0005886|GO:0016021|GO:0005575	NM_022995	Mm.478899	65112	ENSMUST00000109115	TC1597668
A_51_P308298	0.0280283	1.61656	up	76784.8	50715	10.0261	9.33318	64512.6	77051.5	59377.2	72823.8	83368.3	103575	66727.9	46460.5	38956.6	9.70425	10.013	9.71854	10.1379	10.577	10.0059	9.80419	9.2277	8.96767	NM_172118	chr2:156607301-156607360	Myl9	Mus musculus myosin, light polypeptide 9, regulatory (Myl9), mRNA [NM_172118]	GO:0016459|GO:0003774|GO:0005509	NM_172118	Mm.271770	98932	ENSMUST00000088552	TC1572833
A_51_P487162	0.0156575	1.73908	down	206.283	366.639	1.45875	2.25708	156.336	151.044	168.457	237.3	209.301	315.262	373.268	345.92	380.729	1.01546	1.0183	1.25715	1.87631	1.93927	1.64604	2.32226	2.15828	2.2907	NM_028002	chr12:32325073-32325014	Dus4l	Mus musculus dihydrouridine synthase 4-like (S. cerevisiae) (Dus4l), mRNA [NM_028002]	GO:0017150|GO:0008150|GO:0008033|GO:0003674|GO:0008152|GO:0016491|GO:0005575|GO:0003824|GO:0055114|GO:0050660	NM_028002	Mm.62979	71916	ENSMUST00000020977	TC1586181
A_52_P430886	0.00110247	1.87413	down	108.327	214.046	0.574388	1.48061	109.059	93.7554	98.7987	117.731	107.578	123.04	201.587	220.506	220.045	0.495917	0.3303	0.487339	0.865088	0.979077	0.288606	1.43344	1.50865	1.49974	NM_010662	chr11:99980948-99980710	Krt13	Mus musculus keratin 13 (Krt13), mRNA [NM_010662]	GO:0005515|GO:0005882|GO:0005198	NM_010662	Mm.4646	16663	ENSMUST00000107412	TC1578459
A_52_P642005	0.0166365	1.58484	down	240.863	396.263	1.70228	2.36661	227.4	190.288	180.307	267.019	247.278	332.887	357.473	424.234	407.082	1.55605	1.35151	1.35523	2.04654	2.17982	1.72452	2.25988	2.4527	2.38726	NM_001081557	chr4:150435801-150435742	Camta1	Mus musculus calmodulin binding transcription activator 1 (Camta1), transcript variant 1, mRNA [NM_001081557]	GO:0030528|GO:0005634|GO:0008150|GO:0006350|GO:0003674|GO:0005516|GO:0005737|GO:0005575|GO:0045449	NM_001081557	Mm.318846	100072	ENSMUST00000105668	TC1644339
A_52_P381799	0.0384714	1.8247	down	41.6538	71.8706	-0.968485	-0.100823	26.8443	31.1591	25.4728	35.778	35.4363	95.2324	67.1008	82.9318	65.5793	-1.5265	-1.25895	-1.4682	-0.853258	-0.623012	-0.0809941	-0.153555	0.0978327	-0.246747	NM_001081324	chr8:88164375-88164316	Neto2	Mus musculus neuropilin (NRP) and tolloid (TLL)-like 2 (Neto2), mRNA [NM_001081324]	GO:0004872|GO:0016020|GO:0005886|GO:0016021	NM_001081324	Mm.126079	74513	ENSMUST00000047344	TC1600362
A_51_P271529	0.0389134	1.92995	up	185.881	96.4728	1.23583	0.28726	383.906	160.039	132.463	147.504	119.333	172.043	109.91	114.542	64.9664	2.31157	1.10175	0.910361	1.19035	1.12868	0.772253	0.558363	0.563712	-0.260294	AK140034	chr12:104433237-104433178	Prima1	Mus musculus adult male corpora quadrigemina cDNA, RIKEN full-length enriched library, clone:B230105G10 product:Proline rich membrane anchor 1 precursor (PRiMA) homolog [Homo sapiens], full insert sequence. [AK140034]	GO:0005515|GO:0016020|GO:0043495|GO:0030054|GO:0005886|GO:0031226|GO:0045202|GO:0051649|GO:0016021|GO:0042135|GO:0019899		Mm.427936	170952
A_52_P225158	0.00315516	2.86628	down	35.1506	111.695	-1.0629	0.456277	38.5789	28.4996	30.1527	30.9035	45.5247	37.244	62.7472	131.935	140.402	-1.0033	-1.38766	-1.22487	-1.06456	-0.26159	-1.43544	-0.250335	0.76766	0.851507		chr12:116082073-116082006
A_51_P302942	0.0273829	1.50256	down	35.7715	56.0174	-1.04215	-0.454726	36.0898	42.0134	25.0348	30.4149	38.7867	42.2894	56.4504	51.7105	59.8913	-1.09952	-0.827752	-1.49322	-1.08755	-0.492676	-1.25215	-0.402902	-0.583634	-0.377641	NM_145216	chr11:4960167-4960226	Rasl10a	Mus musculus RAS-like, family 10, member A (Rasl10a), mRNA [NM_145216]	GO:0016020|GO:0008150|GO:0003674|GO:0007264|GO:0005886|GO:0005525|GO:0000166|GO:0007165|GO:0005575|GO:0003924	NM_145216	Mm.374836	75668	ENSMUST00000037218	TC1596191
A_51_P222741	0.00061514	1.74009	down	1870.49	3431.87	4.68265	5.48181	1923.49	1929.63	1559.43	1950.6	1695.94	2163.85	3152.61	3446.75	3696.23	4.63646	4.69358	4.46772	4.91544	4.9577	4.42501	5.40052	5.475	5.56992	NM_010381	chr17:34481528-34481469	H2-Ea	Mus musculus histocompatibility 2, class II antigen E alpha (H2-Ea), mRNA [NM_010381]	GO:0019882|GO:0006955|GO:0005886|GO:0042613|GO:0019886|GO:0005764|GO:0006952|GO:0016020|GO:0016064|GO:0009897|GO:0050778|GO:0002504|GO:0016021	NM_010381	Mm.15680	14968	ENSMUST00000040306	TC1580387
A_51_P270519	0.00279481	1.70794	down	100.034	178.615	0.440443	1.2127	91.9271	79.8332	87.8234	108.329	92.2121	140.078	152.717	194.074	189.055	0.249375	0.0983872	0.317452	0.745014	0.756716	0.475714	1.0329	1.32444	1.28074	NM_027263	chr4:148504293-148503010	Apitd1	Mus musculus apoptosis-inducing, TAF9-like domain 1 (Apitd1), mRNA [NM_027263]	GO:0005634|GO:0008150|GO:0003674|GO:0000775|GO:0003677|GO:0006352|GO:0005694|GO:0005575	NM_027263	Mm.260893	69928	ENSMUST00000150150	TC1678740
A_52_P380195	0.00224125	1.98958	down	97.5145	201.653	0.396617	1.38908	84.5547	76.0794	79.2415	106.397	99.4014	139.413	178.846	199.598	226.517	0.128769	0.0289044	0.169103	0.719058	0.865026	0.468843	1.26076	1.36493	1.54156	NM_177305	chr1:90595398-90595339	Arl4c	Mus musculus ADP-ribosylation factor-like 4C (Arl4c), mRNA [NM_177305]	GO:0005634|GO:0008150|GO:0003674|GO:0007264|GO:0005525|GO:0000166|GO:0005575|GO:0005622	NM_177305	Mm.27968	320982		TC1577933
A_52_P638100	0.00522562	2.5808	down	799.884	2094.43	3.38429	4.75211	1188.25	985.444	984.873	583.228	492.832	564.673	1627.15	2243.93	2412.21	3.94158	3.7241	3.80471	3.17366	3.17478	2.4869	4.44632	4.85579	4.95422	AB070552	chr12:117040896-117040837		Mus musculus V102-D-J-IgG1 mRNA, partial cds, sequence:lec-8. [AB070552]			Mm.335723			NP592060
A_51_P516012	3.2875e-06	4.46966	down	27.0375	125.054	-1.45958	0.700581	20.8711	24.126	27.9552	23.7599	24.0815	41.4315	111.296	124.906	138.96	-1.88961	-1.62801	-1.33404	-1.4438	-1.18032	-1.28172	0.576449	0.688679	0.836614	NM_008745	chr13:59033682-59033741	Ntrk2	Mus musculus neurotrophic tyrosine kinase, receptor, type 2 (Ntrk2), transcript variant 2, mRNA [NM_008745]	GO:0004672|GO:0007399|GO:0004713|GO:0005886|GO:0005524|GO:0030154|GO:0043025|GO:0030425|GO:0000166|GO:0030426|GO:0046777|GO:0016020|GO:0005829|GO:0046548|GO:0005030|GO:0014069|GO:0006468|GO:0007631|GO:0016301|GO:0043679|GO:0016021|GO:0014047|GO:0005515|GO:0004872|GO:0051968|GO:0048403|GO:0001570|GO:0007275|GO:0016740|GO:0009986|GO:0046928|GO:0019222|GO:0043197|GO:0030424|GO:0050773|GO:0005887|GO:…	NM_008745	Mm.130054	18212		TC1575671
A_52_P676623	0.00160885	1.54538	down	214.616	349.446	1.54415	2.17211	258.927	214.064	198.922	207.746	150.773	257.263	276.952	387.476	383.909	1.74336	1.52137	1.49697	1.68442	1.46607	1.35273	1.89168	2.32194	2.30271	NM_028319	chr19:40991517-40991576	Zfp518	Mus musculus zinc finger protein 518 (Zfp518), mRNA [NM_028319]	GO:0005634|GO:0046872|GO:0008150|GO:0006350|GO:0003674|GO:0003677|GO:0008270|GO:0005575|GO:0045449|GO:0005622	NM_028319	Mm.313523	72672		TC1737932
A_51_P476481	0.0744678	1.82361	down	129.894	241.508	0.713553	1.58035	81.1943	88.8736	81.3756	157.069	122.686	248.169	142.001	282.511	300.013	0.0702639	0.253153	0.207443	1.281	1.16866	1.3008	0.927945	1.86614	1.94697	NM_145548	chr4:95723288-95712305	Cyp2j13	Mus musculus cytochrome P450, family 2, subfamily j, polypeptide 13 (Cyp2j13), mRNA [NM_145548]	GO:0046872|GO:0008150|GO:0003674|GO:0016491|GO:0004497|GO:0005575|GO:0055114	NM_145548	Mm.268175	230459	ENSMUST00000030305
A_51_P347240	0.00302881	1.51343	down	190.976	301.072	1.37432	1.97214	239.766	189.909	213.984	160.126	137.072	205.003	279.46	312.624	311.133	1.63244	1.34863	1.60228	1.3088	1.32862	1.02513	1.90469	2.01226	1.99947	NM_001081406	chr12:70276105-70276164	Ppil5	Mus musculus peptidylprolyl isomerase (cyclophilin) like 5 (Ppil5), mRNA [NM_001081406]	GO:0008150|GO:0003674|GO:0016853|GO:0005575	NM_001081406	Mm.28847	69706	ENSMUST00000110621	TC1601289
A_51_P225224	0.0324626	1.61561	down	5496.77	9065.78	6.19418	6.88626	4351.59	4405.08	3812.63	6772.24	5577.95	8061.1	9013.09	9025.8	9158.44	5.81428	5.88442	5.75749	6.71116	6.67535	6.32239	6.91599	6.86382	6.87897	NM_019564	chr7:138129081-138129140	Htra1	Mus musculus HtrA serine peptidase 1 (Htra1), mRNA [NM_019564]	GO:0004252|GO:0005515|GO:0005576|GO:0005520|GO:0008236|GO:0030512|GO:0030514|GO:0008233|GO:0003824|GO:0001558|GO:0006508|GO:0016787|GO:0019838	NM_019564	Mm.30156	56213	ENSMUST00000006367	TC1575172
A_51_P154753	0.0518816	1.71588	down	502.141	869.138	2.72444	3.50339	391.309	345.423	330.923	688.85	564.905	691.437	852.859	879.929	874.626	2.33912	2.21169	2.23127	3.41379	3.3717	2.77908	3.51435	3.50522	3.49061	NM_146182	chr7:19979921-19979862	Klc3	Mus musculus kinesin light chain 3 (Klc3), mRNA [NM_146182]	GO:0005515|GO:0042073|GO:0005871|GO:0005874|GO:0005488|GO:0003777|GO:0008017|GO:0008808|GO:0019894|GO:0043005|GO:0009434|GO:0005737|GO:0003774|GO:0035253	NM_146182	Mm.213403	232943	ENSMUST00000047170	TC1582294
A_52_P74229	0.00465221	1.63355	up	182.415	116.455	1.30575	0.597739	165.856	160.486	149.368	170.631	183.855	264.292	129.471	116.324	103.571	1.10074	1.10577	1.08364	1.40048	1.75225	1.39161	0.794673	0.585985	0.412558	XM_001475276	chr11:102438040-102437981		MCG21374, isoform CRA_aNovel protein ; [Source:UniProtKB/TrEMBL;Acc:A6PWP4] [ENSMUST00000107080]		XM_001475276	Mm.277966		ENSMUST00000107080	TC1740221
A_52_P538084	0.00691287	2.11496	down	94.7439	221.039	0.365974	1.4466	115.288	101.782	112.559	79.2604	73.0361	86.5376	140.037	319.202	203.879	0.576055	0.448815	0.675452	0.29427	0.420371	-0.219119	0.907847	2.0423	1.38965	Z25442	chr6:67560270-67560329		M.musculus immunoglobulin kappa light chain (DBA/1) gene, v region. [Z25442]			Mm.333124		ENSMUST00000103303	NP052023
A_51_P508959	0.00517697	1.51492	up	3042.4	2115.96	5.37668	4.77744	2860.69	2601.56	2876.21	3064.77	2783.75	4067.44	2174.41	2378.03	1795.44	5.2091	5.12463	5.35087	5.5673	5.67265	5.33553	4.86459	4.93953	4.5282	NM_030024	chr6:54280124-54280183	Prr15	Mus musculus proline rich 15 (Prr15), mRNA [NM_030024]	GO:0008150|GO:0003674|GO:0007275|GO:0005575	NM_030024	Mm.41984	78004	ENSMUST00000059138	TC1656104
A_51_P134801	0.00470164	1.54347	up	1154.17	791.175	3.98707	3.3609	1311.01	1184.35	1205.72	1123	943.936	1156.99	763.35	899.004	711.172	4.08342	3.98936	4.0966	4.11888	4.11238	3.52179	3.35439	3.53616	3.19214	NM_001025572	chr17:66336089-66336030	Ankrd12	Mus musculus ankyrin repeat domain 12 (Ankrd12), mRNA [NM_001025572]	GO:0008150|GO:0003674|GO:0005575	NM_001025572	Mm.34706	106585	ENSMUST00000038116	TC1658175
A_52_P956125	0.00347566	1.5029	up	50.6882	35.4391	-0.525071	-1.11282	51.2264	51.5249	41.1918	53.209	46.4524	60.5246	35.0937	36.2267	34.997	-0.594228	-0.533331	-0.774794	-0.28066	-0.232486	-0.734925	-1.08867	-1.09704	-1.15276	AK086311	chr17:66315823-66315764	Ankrd12	Mus musculus 15 days embryo head cDNA, RIKEN full-length enriched library, clone:D930020E11 product:unclassifiable, full insert sequence. [AK086311]	GO:0008150|GO:0003674|GO:0005575		Mm.441953	106585		TC1597471
A_51_P401797	0.00302957	4.73569	down	108.203	484.056	0.409109	2.65268	69.3869	57.5715	52.0447	168.456	138.225	163.534	427.389	486.133	538.645	-0.156451	-0.373248	-0.437402	1.38197	1.34071	0.699073	2.51759	2.64919	2.79128	NM_013599	chr2:164780303-164780362	Mmp9	Mus musculus matrix metallopeptidase 9 (Mmp9), mRNA [NM_013599]	GO:0005515|GO:0005576|GO:0005615|GO:0004222|GO:0008233|GO:0005578|GO:0031915|GO:0043065|GO:0042493|GO:0001501|GO:0006508|GO:0006979|GO:0016787|GO:0046872|GO:0008152|GO:0048771|GO:0030198|GO:0031012|GO:0008270|GO:0030574|GO:0008237|GO:0001968	NM_013599	Mm.4406	17395	ENSMUST00000017881	TC1576282
A_52_P167630	0.0635851	1.60285	down	1546.15	2526.56	4.35623	5.03687	1164.06	1086.28	1122.13	1957.49	1735.57	2211.37	2209.81	2743.44	2626.43	3.9119	3.86465	3.99294	4.92053	4.99103	4.45635	4.88789	5.14575	5.07697	NM_021389	chrX:156411953-156412012	Sh3kbp1	Mus musculus SH3-domain kinase binding protein 1 (Sh3kbp1), transcript variant 2, mRNA [NM_021389]	GO:0031410|GO:0006897|GO:0005515|GO:0016020|GO:0030054|GO:0017124|GO:0016301|GO:0045202|GO:0005856|GO:0005737|GO:0019717|GO:0006915	NM_021389	Mm.286495	58194	ENSMUST00000080394	TC1575307
A_51_P420338	0.0543259	1.54211	down	43.521	65.9225	-0.846339	-0.221433	27.159	34.659	37.1371	41.4189	34.0625	86.6897	68.2079	70.5173	59.0423	-1.50969	-1.10537	-0.924293	-0.64204	-0.680054	-0.216585	-0.129947	-0.136114	-0.398238	AK029018	chr18:20705763-20705822	Dsg3	Mus musculus 10 days neonate skin cDNA, RIKEN full-length enriched library, clone:4732482D04 product:desmoglein 3, full insert sequence. [AK029018]	GO:0030057|GO:0007156|GO:0005887|GO:0005515|GO:0016020|GO:0007155|GO:0030054|GO:0005886|GO:0016021|GO:0005914|GO:0005509		Mm.106811	13512		TC1595352
A_51_P152946	0.0269789	1.50355	down	604.592	942.838	3.03009	3.61846	522.287	460.571	512.312	716.675	584.242	831.468	868.119	962.379	998.016	2.75565	2.62675	2.8618	3.47092	3.42025	3.04514	3.53993	3.63444	3.681	NM_009534	chr9:7932599-7932540	Yap1	Mus musculus yes-associated protein 1 (Yap1), transcript variant 2, mRNA [NM_009534]	GO:0005667|GO:0005515|GO:0016563|GO:0070064|GO:0045944	NM_009534	Mm.221992	22601	ENSMUST00000065353	TC1781554
A_52_P75348	0.0418076	1.63285	down	66.3527	111.883	-0.164108	0.543286	56.8604	47.5592	51.245	83.455	76.4185	82.5779	102.875	113.787	118.988	-0.443691	-0.648878	-0.459741	0.368669	0.485683	-0.28669	0.462935	0.554169	0.612753	NM_027411	chr11:34623326-34623267	Ccdc99	Mus musculus coiled-coil domain containing 99 (Ccdc99), mRNA [NM_027411]	GO:0005634|GO:0008150|GO:0003674|GO:0007067|GO:0005856|GO:0005737|GO:0051301|GO:0007049|GO:0005575|GO:0000776	NM_027411	Mm.194368	70385	ENSMUST00000093191	TC1578334
A_51_P158814	0.0887076	1.72839	up	80.4607	45.7331	0.0390953	-0.750331	121.058	107.213	104.248	49.198	50.6723	50.3734	50.3553	40.619	46.2251	0.646515	0.523813	0.564801	-0.393729	-0.107043	-0.999784	-0.567743	-0.931939	-0.751312	AK081212	chr19:42224196-42224255	Marveld1	Mus musculus adult male corpus striatum cDNA, RIKEN full-length enriched library, clone:C030005I21 product:HYPOTHETICAL 18.9 KDA PROTEIN homolog [Homo sapiens], full insert sequence. [AK081212]	GO:0005634|GO:0016020|GO:0008150|GO:0003674|GO:0016021|GO:0005575		Mm.206250	277010		TC1602770
A_52_P383114	0.0148978	2.36628	down	958.345	2203.07	3.60266	4.84528	1482.51	1190.56	1306.36	634.194	494.359	642.095	2169.85	2205.9	2233.47	4.26078	3.99689	4.21225	3.29452	3.17925	2.67227	4.86156	4.83113	4.84316	AY151141	chr16:19085147-19063333	Igl-V1	Mus musculus anti-deoxynivalenol scFv lambda light chain variable region mRNA, partial cds. [AY151141]			Mm.326349	16142
A_51_P477676	3.75997e-05	1.64526	down	122.786	212.246	0.749972	1.46828	130.968	116.83	120.502	121.44	97.8552	149.123	203.514	207.921	225.305	0.760024	0.647737	0.773835	0.909845	0.842408	0.565985	1.44717	1.42387	1.53382	NM_173189	chr8:18802289-18802348	Mcph1	Mus musculus microcephaly, primary autosomal recessive 1 (Mcph1), mRNA [NM_173189]	GO:0008150|GO:0003674|GO:0005856|GO:0005737|GO:0005575|GO:0005622	NM_173189	Mm.235296	244329	ENSMUST00000039412	TC1581295
A_52_P1116870	0.000101549	1.51697	down	2199.96	3488.37	4.89711	5.4983	2336.85	2192.92	2213.44	1980.03	1524.82	2951.7	2922.17	3768.02	3774.94	4.91731	4.8781	4.973	4.93705	4.80425	4.87296	5.29101	5.60357	5.60032	NM_008971	chr15:94408396-94408379	Twf1	Mus musculus twinfilin, actin-binding protein, homolog 1 (Drosophila) (Twf1), mRNA [NM_008971]	GO:0004713|GO:0005856|GO:0005737|GO:0003779|GO:0015629|GO:0005622	NM_008971	Mm.309867	19230	ENSMUST00000023087	TC1574306
A_51_P262766	0.00446056	1.61873	down	1727.05	2946.81	4.56707	5.26193	1706.83	1475.49	1585.55	1936.3	1650.32	2007.79	2685.31	3021.54	3133.58	4.46406	4.30644	4.49169	4.90483	4.91836	4.31702	5.16906	5.28505	5.33168	S78355	chr7:152116232-152116173	Ccnd1	Cyl-1=cyclin D1 [mice, BALB/c, brain, mRNA, 3737 nt]. [S78355]	GO:0060749|GO:0030968|GO:0004672|GO:0051726|GO:0000320|GO:0033327|GO:0060070|GO:0051301|GO:0007049|GO:0019901|GO:0030178|GO:0000307|GO:0005634|GO:0045444|GO:0007595|GO:0016538|GO:0006468|GO:0016301|GO:0033598|GO:0030857|GO:0005737|GO:0010243|GO:0032403|GO:0008284			12443
A_51_P294979	0.0690782	1.52632	up	26980.6	18179.5	8.49924	7.88918	19575.8	25468.4	19016.5	35723.3	28410.3	33689.1	19064.8	17980.3	17493.5	7.98374	8.41589	8.07589	9.11032	9.02396	8.38562	7.99681	7.85811	7.81261	NM_013602	chr8:96704011-96704070	Mt1	Mus musculus metallothionein 1 (Mt1), mRNA [NM_013602]	GO:0005764|GO:0010273|GO:0006875|GO:0046872|GO:0005829|GO:0006882|GO:0007263|GO:0008270|GO:0005507	NM_013602	Mm.192991	17748	ENSMUST00000062980	TC1589649
A_52_P681391	2.04159e-06	2.0187	down	117.959	248.214	0.679504	1.69293	120.713	121.159	101.095	108.405	93.1715	163.214	258.794	227.501	258.347	0.642392	0.700224	0.52049	0.746029	0.771648	0.696243	1.79385	1.55371	1.73125	NM_008059	chr1:195098984-195098925	G0s2	Mus musculus G0/G1 switch gene 2 (G0s2), mRNA [NM_008059]	GO:0007049	NM_008059	Mm.439721	14373	ENSMUST00000009777	TC1640864
A_51_P452629	0.0110458	1.77405	down	1807.93	3299.89	4.60046	5.42751	1233.1	1852.81	1389.28	2141.85	1735.21	2495.29	3171.91	3436.81	3290.95	3.99503	4.63497	4.30104	5.05039	4.99073	4.63062	5.40932	5.47083	5.40237	NM_011905	chr3:83640403-83640344	Tlr2	Mus musculus toll-like receptor 2 (Tlr2), mRNA [NM_011905]	GO:0002687|GO:0042495|GO:0004888|GO:0005886|GO:0006954|GO:0031224|GO:0002755|GO:0042497|GO:0045429|GO:0032722|GO:0042496|GO:0042535|GO:0031410|GO:0016020|GO:0032700|GO:0060907|GO:0070542|GO:0002752|GO:0004872|GO:0042892|GO:0008034|GO:0044130|GO:0071223|GO:0032494|GO:0007165|GO:0052033|GO:0035354|GO:0045087|GO:0002224|GO:0046982|GO:0051092|GO:0032755|GO:0002238|GO:0042742|GO:0016021|GO:0009617|GO:…	NM_011905	Mm.87596	24088	ENSMUST00000029623	TC1580205
A_52_P860000	4.02608e-05	2.37597	up	124.491	55.1927	0.774427	-0.474092	145.295	128.943	114.838	110.238	114.925	132.707	55.67	56.8179	53.0902	0.9098	0.790057	0.704376	0.770217	1.07439	0.397727	-0.422986	-0.447748	-0.551542	NM_175013	chr19:24754797-24754738	Pgm5	Mus musculus phosphoglucomutase 5 (Pgm5), mRNA [NM_175013]	GO:0005515|GO:0000287|GO:0008150|GO:0016868|GO:0030018|GO:0005975|GO:0030055|GO:0006006|GO:0004614|GO:0046872|GO:0007155|GO:0030054|GO:0005737|GO:0005856|GO:0016010|GO:0005913	NM_175013	Mm.105222	226041		TC1605723
A_52_P319495	0.0222484	1.52081	down	288.467	450.361	1.94797	2.55281	380.788	336.932	332.927	223.586	181.1	275.469	448.737	420.664	481.681	2.2998	2.17578	2.23998	1.79043	1.73047	1.45137	2.58791	2.4405	2.63002	NM_172506	chr16:44485904-44485845	Boc	Mus musculus biregional cell adhesion molecule-related/down-regulated by oncogenes (Cdon) binding protein (Boc), mRNA [NM_172506]	GO:0016202|GO:0005515|GO:0030030|GO:0043025|GO:0009986|GO:0030424|GO:0051789|GO:0030426|GO:0005887|GO:0007155|GO:0016020|GO:0016337|GO:0007411|GO:0007224|GO:0016021|GO:0045663	NM_172506	Mm.41561	117606	ENSMUST00000114634	TC1577330
A_51_P381015	0.00333631	1.62217	down	271.274	461.052	1.88957	2.58749	335.011	225.82	253.745	291.392	225.779	295.896	436.266	461.258	485.633	2.11502	1.5985	1.84816	2.17256	2.0486	1.55457	2.54725	2.57341	2.64181	NM_007966	chr6:52267893-52267952	Evx1	Mus musculus even skipped homeotic gene 1 homolog (Evx1), mRNA [NM_007966]	GO:0030528|GO:0005634|GO:0043565|GO:0003700|GO:0007275|GO:0003677|GO:0045944|GO:0006355|GO:0009792|GO:0045449|GO:0021913	NM_007966	Mm.389754	14028	ENSMUST00000031787	TC1595533
A_51_P323583	0.00151335	1.86444	down	416.628	812.211	2.50461	3.40335	526.612	436.423	466.481	361.535	320.949	387.767	746.901	836.506	853.225	2.76755	2.54905	2.72659	2.48373	2.55603	1.94467	3.32296	3.43221	3.45487	NM_134111	chr16:36793998-36793939	Eaf2	Mus musculus ELL associated factor 2 (Eaf2), transcript variant 1, mRNA [NM_134111]	GO:0005654|GO:0030308|GO:0005634|GO:0005515|GO:0016563|GO:0006350|GO:0045941|GO:0008629|GO:0060770|GO:0006917|GO:0045449	NM_134111	Mm.432078	106389	ENSMUST00000023537	NP812117
A_51_P357573	0.000292043	1.55341	up	349.225	236.295	2.25788	1.62244	356.972	346.994	302.446	336.606	309.798	442.535	219.683	238.929	250.274	2.20663	2.21824	2.10145	2.38066	2.50501	2.13527	1.55746	1.62442	1.68545	NM_145575	chr6:34723839-34723898	Cald1	Mus musculus caldesmon 1 (Cald1), mRNA [NM_145575]	GO:0032092|GO:0005624|GO:0014069|GO:0006940|GO:0043025|GO:0030478|GO:0005884|GO:0030425|GO:0043197|GO:0003779|GO:0051017	NM_145575	Mm.308134	109624	ENSMUST00000045191	TC1575382
A_51_P380276	0.00102432	2.134	up	74.3153	36.9222	0.0168519	-1.07671	90.238	86.8972	76.6045	58.5173	59.2167	74.4181	42.4047	40.2856	28.0764	0.22262	0.220708	0.120276	-0.143466	0.117765	-0.436792	-0.815663	-0.943828	-1.47063	AK132310	chr1:136652900-136652841		protein phosphatase 1, regulatory (inhibitor) subunit 12B Gene [Source:MGI Symbol;Acc:MGI:1916417] [ENSMUST00000045665]			Mm.451578		ENSMUST00000045665	TC1619830
A_51_P323180	5.12635e-05	1.67087	down	195.613	343.233	1.42198	2.16258	207.71	184.406	178.63	183.406	172.3	247.226	333.01	340.879	355.809	1.42538	1.30621	1.34175	1.50464	1.65861	1.29531	2.15761	2.1371	2.19304	NM_172777	chr5:105509005-105508946	Gbp9	Mus musculus guanylate-binding protein 9 (Gbp9), mRNA [NM_172777]		NM_172777	Mm.425261	236573	ENSMUST00000031238	TC1585558
A_51_P282930	0.000280913	2.17596	up	2391.91	1142.87	5.01597	3.89432	3003.75	2650.62	2682.45	1969.99	1633.73	2410.9	1150.69	1245.01	1032.9	5.2795	5.15158	5.25025	4.92972	4.90378	4.58098	3.94647	4.00592	3.73057	NM_011281	chr3:94201609-94201668	Rorc	Mus musculus RAR-related orphan receptor gamma (Rorc), mRNA [NM_011281]	GO:0033077|GO:0004872|GO:0003700|GO:0006350|GO:0003707|GO:0048537|GO:0030154|GO:0006355|GO:0045449|GO:0005634|GO:0043565|GO:0046872|GO:0048535|GO:0003677|GO:0004879|GO:0006468|GO:0008270|GO:0046632	NM_011281	Mm.4372	19885	ENSMUST00000029795	TC1582154
A_51_P509651	0.0197816	1.76923	down	666.093	1200.16	3.14216	3.96528	526.54	464.819	506.508	856.091	647.5	995.102	1079.47	1251.02	1269.99	2.76736	2.63999	2.84536	3.72736	3.56857	3.30433	3.85429	4.01286	4.02869	NM_028760	chr19:38148576-38148635	Cep55	Mus musculus centrosomal protein 55 (Cep55), transcript variant 2, mRNA [NM_028760]	GO:0008150|GO:0003674|GO:0007067|GO:0005856|GO:0005737|GO:0051301|GO:0007049|GO:0005575	NM_028760	Mm.9916	74107	ENSMUST00000096096	TC1590265
A_51_P171215	0.0214687	1.74388	down	91.5931	160.828	0.264982	1.06728	128.281	105.966	116.495	55.563	57.8602	85.3938	171.125	149.602	161.758	0.730125	0.506921	0.725038	-0.218206	0.0843306	-0.238315	1.19709	0.94897	1.05578	NM_007950	chr5:91521659-91521720	Ereg	Mus musculus epiregulin (Ereg), mRNA [NM_007950]	GO:0005154|GO:0009887|GO:0005886|GO:0030154|GO:0008083|GO:0001525|GO:0019221|GO:0045089|GO:0045740|GO:0016020|GO:0007173|GO:0016021|GO:0008285|GO:0008284|GO:0001819|GO:0005576|GO:0007275|GO:0005615|GO:0051781|GO:0045741|GO:0048661|GO:0045840|GO:0009653|GO:0042327|GO:0045410	NM_007950	Mm.4791	13874	ENSMUST00000031324
A_51_P469951	1.89805e-05	1.78936	down	252.201	470.554	1.77747	2.61691	246.478	299.133	231.568	218.888	194.351	322.789	477.888	442.606	491.168	1.67227	2.00411	1.71621	1.75979	1.83235	1.68007	2.67871	2.51386	2.65816	NM_080448	chr6:112668298-112668239	Srgap3	Mus musculus SLIT-ROBO Rho GTPase activating protein 3 (Srgap3), mRNA [NM_080448]	GO:0005515|GO:0008150|GO:0005096|GO:0007165|GO:0005575|GO:0005622	NM_080448	Mm.236401	259302	ENSMUST00000088373	TC1652574
A_51_P370470	0.0109847	1.85854	down	302.335	579.08	2.01904	2.91321	258.691	222.63	225.642	378.353	314.074	414.62	535.264	558.834	643.141	1.74204	1.57797	1.67881	2.54933	2.52479	2.04127	2.84229	2.85026	3.04708	NM_030013	chr1:60444156-60444215	Cyp20a1	Mus musculus cytochrome P450, family 20, subfamily A, polypeptide 1 (Cyp20a1), mRNA [NM_030013]	GO:0005506|GO:0009055|GO:0046872|GO:0016020|GO:0008150|GO:0003674|GO:0020037|GO:0016491|GO:0004497|GO:0016021|GO:0005575|GO:0055114	NM_030013	Mm.197640	77951	ENSMUST00000060608	TC1583606
A_52_P179168	0.0873916	1.63883	up	92.0113	50.7687	0.102453	-0.610216	81.0728	83.4707	72.4026	49.8379	40.2422	225.042	53.5485	40.6959	58.0619	0.0681028	0.162669	0.038888	-0.375087	-0.439531	1.15967	-0.479041	-0.929208	-0.422397	NM_177813	chr14:13991063-13991004	Gm5087	Mus musculus predicted gene 5087 (Gm5087), mRNA [NM_177813]	GO:0008150|GO:0003674|GO:0005575	NM_177813	Mm.252404	328354	ENSMUST00000060526	TC1592453
A_52_P426049	0.0122949	1.5129	down	189.158	300.69	1.37234	1.96966	222.019	200.961	214.871	162.484	158.542	176.07	280.782	324.346	296.942	1.5215	1.43024	1.60825	1.3299	1.53855	0.805634	1.91149	2.06537	1.93212	NM_020044	chr5:135081816-135080627	Lat2	Mus musculus linker for activation of T cells family, member 2 (Lat2), transcript variant 1, mRNA [NM_020044]	GO:0043303|GO:0042113|GO:0016020|GO:0005886|GO:0045121|GO:0050853|GO:0016021	NM_020044	Mm.391375	56743	ENSMUST00000036362	NP228643
A_51_P296015	0.00602142	1.6496	up	89.1606	55.8597	0.263978	-0.458136	111.58	111.053	94.975	67.7796	61.9073	87.6687	59.4211	52.3043	55.8537	0.528888	0.574578	0.430394	0.0685215	0.18187	-0.200384	-0.32891	-0.567163	-0.478335	NM_178673	chr3:76512485-76512544	Fstl5	Mus musculus follistatin-like 5 (Fstl5), mRNA [NM_178673]	GO:0005576|GO:0005509	NM_178673	Mm.379337	213262	ENSMUST00000038364	TC1579422
A_51_P340255	0.0706113	1.54752	down	339.908	534.669	2.17193	2.80189	249.487	287.956	219.115	408.515	381.598	492.773	512.671	538.71	552.625	1.68978	1.94918	1.63646	2.65999	2.80574	2.29041	2.78008	2.79735	2.82824	NM_030595	chr3:55429327-55429268	Nbea	Mus musculus neurobeachin (Nbea), mRNA [NM_030595]	GO:0045211|GO:0005886|GO:0006605|GO:0005488|GO:0019901|GO:0006892|GO:0016020|GO:0005829|GO:0030054|GO:0051018|GO:0045202|GO:0008104|GO:0005802|GO:0012505	NM_030595	Mm.384353	26422	ENSMUST00000107943	TC1597512
A_51_P212183	0.0300565	1.52767	down	3194.27	5151.64	5.44224	6.05358	2811.99	2591.59	2702.47	3660.94	3307.79	4090.86	4104.59	5951.76	5398.58	5.18433	5.11909	5.26098	5.82374	5.92149	5.34382	5.78121	6.26308	6.11645	NM_025849	chr4:74923429-74923370	3110001D03Rik	Mus musculus RIKEN cDNA 3110001D03 gene (3110001D03Rik), mRNA [NM_025849]	GO:0016020|GO:0008150|GO:0003674|GO:0016021|GO:0005575	NM_025849	Mm.24332	66928	ENSMUST00000030103	TC1578917
A_51_P406115	0.00763087	1.61452	down	255.056	431.388	1.79222	2.48332	298.039	297.56	292.865	219.936	181.494	240.442	363.329	470.735	460.1	1.94632	1.99651	2.05501	1.76668	1.73361	1.25517	2.28332	2.60275	2.56389	AF011379	chr9:70625964-70626022	Adam10	Mus musculus kuzbanian (mkuz) mRNA, complete cds. [AF011379]	GO:0005886|GO:0008233|GO:0019901|GO:0004175|GO:0006508|GO:0005634|GO:0046872|GO:0016020|GO:0014069|GO:0006468|GO:0008270|GO:0005802|GO:0008237|GO:0016021|GO:0005515|GO:0042169|GO:0001701|GO:0017124|GO:0004222|GO:0006913|GO:0042803|GO:0007220|GO:0016787|GO:0005624|GO:0005737|GO:0007219		Mm.3037	11487
A_51_P499918	0.0198063	1.51645	down	351.601	552.288	2.24823	2.84893	437.805	417.256	401.383	286.411	248.519	318.232	570.356	538.031	548.476	2.5011	2.48426	2.50975	2.14769	2.18705	1.65956	2.93391	2.79553	2.81737	NM_010407	chr2:152974812-152976739	Hck	Mus musculus hemopoietic cell kinase (Hck), transcript variant 1, mRNA [NM_010407]	GO:0050830|GO:0004672|GO:0005515|GO:0004713|GO:0016020|GO:0004715|GO:0005524|GO:0016740|GO:0016301|GO:0006909|GO:0006468|GO:0000166	NM_010407	Mm.715	15162	ENSMUST00000003370	TC1576965
A_51_P331288	0.0312556	1.57424	down	244.104	386.864	1.68042	2.33507	290.617	325.892	300.837	162.715	135.747	248.814	395.459	370.048	395.085	1.90993	2.12772	2.09376	1.33195	1.31461	1.30455	2.40557	2.25555	2.3441	NM_009731	chr6:34372905-34372964	Akr1b7	Mus musculus aldo-keto reductase family 1, member B7 (Akr1b7), mRNA [NM_009731]	GO:0005737|GO:0005739|GO:0016491|GO:0044255|GO:0004032|GO:0055114	NM_009731	Mm.5378	11997	ENSMUST00000007449	TC1583253
A_52_P949440	0.00135528	1.50276	up	416.73	291.377	2.50788	1.92027	437.752	487.512	369.577	366.671	336.758	502.11	331.303	268.77	274.058	2.50093	2.70876	2.39065	2.50408	2.6254	2.31748	2.15019	1.79421	1.81642	NM_009365	chr7:135396024-135396307	Tgfb1i1	Mus musculus transforming growth factor beta 1 induced transcript 1 (Tgfb1i1), mRNA [NM_009365]	GO:0045165|GO:0005515|GO:0045599|GO:0030154|GO:0030855|GO:0016055|GO:0016331|GO:0005634|GO:0046872|GO:0030054|GO:0005737|GO:0005856|GO:0005925|GO:0008270|GO:0009408	NM_009365	Mm.3248	21804	ENSMUST00000070656	NP1404744
A_51_P431470	0.000622152	1.71548	down	443.474	793.976	2.5906	3.36921	411.199	432.5	366.255	393.199	427.082	630.608	719.34	858.78	803.808	2.41065	2.53603	2.37762	2.60486	2.9682	2.64623	3.26872	3.47012	3.36879	NM_026178	chr11:90139503-90139562	Mmd	Mus musculus monocyte to macrophage differentiation-associated (Mmd), mRNA [NM_026178]	GO:0005764|GO:0004872|GO:0016020|GO:0005768|GO:0019835|GO:0016021	NM_026178	Mm.277518	67468	ENSMUST00000004050	TC1575287
A_51_P486008	0.000660374	1.66464	up	1492.35	947.512	4.3595	3.62429	1685.26	1445.12	1483.36	1371.36	1334.26	1634.76	902	1046.14	894.398	4.44571	4.27644	4.39557	4.40713	4.61166	4.02049	3.59517	3.75484	3.52286	NM_027349	chr12:85001574-85004933	Rbm25	Mus musculus RNA binding motif protein 25 (Rbm25), mRNA [NM_027349]	GO:0003676|GO:0005634|GO:0008150|GO:0003674|GO:0008380|GO:0005737|GO:0003723|GO:0006915|GO:0006397|GO:0000166|GO:0005575	NM_027349	Mm.46005	67039	ENSMUST00000048155	TC1768860
A_52_P672689	0.0109927	1.58797	down	117.174	195.625	0.683683	1.35087	110.664	97.6418	106.145	134.571	119.061	134.961	184.794	199.474	202.606	0.517003	0.388896	0.590818	1.05797	1.12539	0.422025	1.30796	1.36404	1.38062	NM_007568	chr5:91787007-91786948	Btc	Mus musculus betacellulin, epidermal growth factor family member (Btc), mRNA [NM_007568]	GO:0005576|GO:0016020|GO:0005886|GO:0045840|GO:0051781|GO:0043066|GO:0003103|GO:0048146|GO:0008083|GO:0045597|GO:0016021|GO:0008284	NM_007568	Mm.2024	12223	ENSMUST00000115974	TC1583514
A_51_P273433	0.000280889	4.06146	down	177.286	709.476	1.18549	3.20748	151.816	321.481	187.611	129.17	94.1865	179.449	643.751	745.361	739.316	0.973138	2.10806	1.41252	0.998868	0.78728	0.833054	3.10855	3.26577	3.24813	NM_008926	chr5:99372439-99371183	Prkg2	Mus musculus protein kinase, cGMP-dependent, type II (Prkg2), mRNA [NM_008926]	GO:0030553|GO:0004672|GO:0004674|GO:0005524|GO:0016740|GO:0016301|GO:0006468|GO:0000166|GO:0004692	NM_008926	Mm.263002	19092	ENSMUST00000031277	TC1635089
A_51_P346445	0.00030883	2.77472	up	222.047	84.3417	1.59336	0.121013	200.574	217.094	160.206	245.219	221.634	287.552	102.604	79.1063	71.3149	1.37495	1.54165	1.1847	1.92367	2.02187	1.51331	0.459126	0.0296998	-0.125785	NM_013868	chr4:140980355-140980414	Hspb7	Mus musculus heat shock protein family, member 7 (cardiovascular) (Hspb7), mRNA [NM_013868]	GO:0006950|GO:0005856|GO:0005739|GO:0009408	NM_013868	Mm.46181	29818	ENSMUST00000102486	TC1619706
A_51_P253481	0.00475838	3.981	down	752.35	2639.88	3.11075	5.10388	737.179	1289.56	837.373	275.42	241.566	1133	2442.34	2661.48	2815.8	3.25283	4.11214	3.57065	2.09123	2.1461	3.49156	5.03224	5.10199	5.17742	NM_021456	chr8:95826781-95826722	Ces1	Mus musculus carboxylesterase 1 (Ces1), mRNA [NM_021456]	GO:0016787|GO:0004091|GO:0005783	NM_021456	Mm.22720	12623	ENSMUST00000044602	TC1584507
A_51_P316673	0.00211788	1.82349	down	2811.52	5325.82	5.24883	6.11553	2112.03	2479.25	2825.57	3023.74	2455.88	3972.67	5820.21	5209.03	4948.23	4.77137	5.05516	5.32525	5.54786	5.49185	5.30152	6.28504	6.07078	5.99078	NM_144544	chr11:58421821-58421762	2210407C18Rik	Mus musculus RIKEN cDNA 2210407C18 gene (2210407C18Rik), mRNA [NM_144544]	GO:0008150|GO:0003674|GO:0005575	NM_144544	Mm.58038	78354	ENSMUST00000048801	TC1586262
A_51_P246166	0.0306617	4.77595	down	13334.5	49220.6	7.06136	9.31714	4753.59	3648.09	4217.43	24852.4	20132.3	22403	41981.3	55940.3	49740.3	5.94176	5.6124	5.90307	8.58684	8.52705	7.79703	9.13564	9.49558	9.32021	NM_007969	chr11:83524751-83524810	Expi	Mus musculus extracellular proteinase inhibitor (Expi), mRNA [NM_007969]	GO:0005576|GO:0030414	NM_007969	Mm.1650	14038	ENSMUST00000001009	TC1577563
A_52_P565106	0.0377609	2.11296	down	2251.37	4565.16	4.81223	5.8915	3659.93	2936.79	2971.01	1393.51	1112.78	1434.19	4115.15	4531.67	5048.67	5.56456	5.29949	5.39766	4.43025	4.34978	3.83165	5.78491	5.86981	6.01977		chr12:117158532-117158473
A_51_P439966	0.00721535	1.58568	up	8957.35	5943.29	6.93556	6.27045	10750.5	9023.41	10034.5	8700.58	6803.46	8431.64	5191.04	6545.66	6093.18	7.11907	6.91893	7.15361	7.07264	6.96188	6.38722	6.11999	6.4003	6.29106	NM_010281	chr4:19992975-19993034	Ggh	Mus musculus gamma-glutamyl hydrolase (Ggh), mRNA [NM_010281]	GO:0005576|GO:0045471|GO:0005615|GO:0008233|GO:0010043|GO:0032868|GO:0003824|GO:0005764|GO:0042493|GO:0008242|GO:0016787|GO:0005829|GO:0006541|GO:0034722	NM_010281	Mm.20461	14590	ENSMUST00000029904	TC1578528
A_52_P236671	0.00125471	1.69293	down	104.07	185.143	0.512434	1.27195	99.8911	110.679	84.4412	110.059	95.9916	123.356	184.665	178.697	192.068	0.369242	0.569713	0.260795	0.767875	0.814669	0.292308	1.30695	1.20535	1.30356	NM_030595	chr3:55429767-55429708	Nbea	Mus musculus neurobeachin (Nbea), mRNA [NM_030595]	GO:0045211|GO:0005886|GO:0006605|GO:0005488|GO:0019901|GO:0006892|GO:0016020|GO:0005829|GO:0030054|GO:0051018|GO:0045202|GO:0008104|GO:0005802|GO:0012505	NM_030595	Mm.384353	26422	ENSMUST00000107943	TC1597512
A_51_P358765	0.000130849	5.39517	down	773.241	4250.92	3.35596	5.78763	644.443	550.975	506.69	1070.64	847.388	1019.31	3845.76	4125.36	4781.63	3.05887	2.88531	2.84588	4.05001	3.95671	3.339	5.68724	5.73428	5.94137	NM_009263	chr5:104869788-104869847	Spp1	Mus musculus secreted phosphoprotein 1 (Spp1), mRNA [NM_009263]	GO:0010033|GO:0005515|GO:0005576|GO:0001503|GO:0005125|GO:0005615|GO:0031988|GO:0001649|GO:0045780|GO:0006916|GO:0007155|GO:0010811|GO:0042995|GO:0048471|GO:0050840|GO:0005737|GO:0048545|GO:0045177|GO:0031214	NM_009263	Mm.288474	20750	ENSMUST00000112747	TC1573661
A_52_P172441	0.00072678	1.79629	down	33.4019	63.8929	-1.12811	-0.283085	39.2258	31.9564	32.2058	28.6357	29.3461	39.0416	58.5776	53.7325	79.3686	-0.979311	-1.2225	-1.12983	-1.17451	-0.895069	-1.36743	-0.349537	-0.528299	0.0285807	NM_173397	chr2:163294503-163294444	Fitm2	Mus musculus fat storage-inducing transmembrane protein 2 (Fitm2), mRNA [NM_173397]	GO:0016020|GO:0005739|GO:0016021|GO:0005783	NM_173397	Mm.242917	228859	ENSMUST00000109418	TC1580578
A_51_P457244	0.00652095	1.98631	down	501.237	1071.78	2.78365	3.77374	499.318	439.762	439.423	526.736	579.096	523.084	773.709	1265.5	1176.13	2.69077	2.56005	2.64038	3.02668	3.40749	2.37653	3.37383	4.02948	3.91792	NM_021365	chrX:70467736-70467792	Xlr4b	Mus musculus X-linked lymphocyte-regulated 4B (Xlr4b), mRNA [NM_021365]	GO:0008150|GO:0003674|GO:0005575	NM_021365	Mm.104764	27083	ENSMUST00000068551	TC1590754
A_51_P443339	0.0264675	2.67255	down	1577.52	3702.19	4.16611	5.58433	1113.25	3628.39	1699.85	717.044	563.284	1743.29	4330.97	3391.47	3384.12	3.84753	5.60458	4.59211	3.47166	3.36755	4.11322	5.85866	5.45167	5.44265	NM_133960	chr8:107263207-107263266	Ces6	Mus musculus carboxylesterase 6 (Ces6), mRNA [NM_133960]	GO:0005792|GO:0016787|GO:0004091|GO:0006486	NM_133960	Mm.212983	102022	ENSMUST00000034346	TC1712041
A_52_P534749	0.000132665	2.35197	down	165.544	404.314	1.1632	2.39707	211.482	180.57	174.873	153.719	107.495	165.125	382.984	393.208	436.751	1.45135	1.27589	1.31108	1.24989	0.977955	0.713038	2.35932	2.34313	2.48875	NM_008719	chr1:39418941-39419000	Npas2	Mus musculus neuronal PAS domain protein 2 (Npas2), mRNA [NM_008719]	GO:0045475|GO:0003700|GO:0006350|GO:0045944|GO:0006355|GO:0007165|GO:0045449|GO:0030528|GO:0005634|GO:0005667|GO:0003677|GO:0048511|GO:0042745|GO:0004871	NM_008719	Mm.2380	18143	ENSMUST00000056815	TC1589507
A_52_P335064	0.000287274	1.72438	up	2099.21	1279.47	4.838	4.05192	2114.74	2094.19	1784.51	1932.19	1811.09	2858.52	1464.56	1268.11	1105.75	4.77322	4.81165	4.66224	4.90176	5.05247	4.82668	4.29443	4.03244	3.82889	NM_181390	chr14:31693884-31694117	Mustn1	Mus musculus musculoskeletal, embryonic nuclear protein 1 (Mustn1), mRNA [NM_181390]	GO:0005654|GO:0042060|GO:0005634|GO:0003674|GO:0042246	NM_181390	Mm.220895	66175	ENSMUST00000040715	TC1754154
A_51_P272341	0.0663891	2.0273	down	2299.42	4363.2	4.81037	5.82993	3749.23	3149.04	3176.53	1302.77	1066.35	1352.58	4422.43	4111.99	4555.17	5.59933	5.40016	5.49415	4.33311	4.2883	3.74713	5.88881	5.7296	5.87137	FJ265534	chr12:116831383-116831324		Mus musculus anti-hemoglobin 2A1 monoclonal antibody immunoglobulin heavy chain variable region mRNA, partial cds. [FJ265534]			Mm.436242		ENSMUST00000103537	NP614375
A_52_P653565	1.79739e-05	4.12142	down	126.041	555.309	0.790132	2.83327	143.793	128.515	141.562	119.606	103.272	119.5	422.639	590.6	652.689	0.894808	0.785262	1.00621	0.887889	0.920135	0.246491	2.50147	2.93002	3.06833	XM_908868	chr12:115984663-115984604		PREDICTED: Mus musculus similar to Igh-1a protein (LOC634206), mRNA [XM_908868]		XM_908868	Mm.423936		ENSMUST00000103507	NP614395
A_51_P224263	0.00104939	2.62963	down	124.011	333.949	0.714293	2.10915	93.0509	81.1387	147.859	133.322	100.645	188.049	269.955	360.304	371.587	0.266905	0.121788	1.069	1.04451	0.882966	0.90059	1.85476	2.21705	2.25564	NM_134052	chr12:29366375-29366434	Adi1	Mus musculus acireductone dioxygenase 1 (Adi1), mRNA [NM_134052]	GO:0008150|GO:0005886|GO:0016491|GO:0019509|GO:0051213|GO:0005634|GO:0008652|GO:0003674|GO:0009086|GO:0016020|GO:0046872|GO:0016702|GO:0005575|GO:0055114	NM_134052	Mm.291504	104923	ENSMUST00000135772	TC1576366
A_52_P31381	0.0379389	1.60183	up	8105.43	5091.05	6.72936	6.04965	11159.6	10047.5	9884.77	5074.72	4746.87	7719.14	4608.85	5554.12	5110.18	7.17295	7.07402	7.13191	6.29485	6.44259	6.25985	5.94838	6.16332	6.03724	NM_021353	chr12:32158340-32158399	Slc26a3	Mus musculus solute carrier family 26, member 3 (Slc26a3), mRNA [NM_021353]	GO:0015297|GO:0005887|GO:0005215|GO:0016020|GO:0055085|GO:0016324|GO:0031526|GO:0015380|GO:0008271|GO:0016021|GO:0008272|GO:0006810	NM_021353	Mm.283281	13487	ENSMUST00000001254	TC1591497
A_52_P290325	0.0677612	1.69907	down	95.4877	163.181	0.312986	1.07773	58.8437	65.2766	72.5587	128.597	100.96	146.689	133.658	178.509	177.378	-0.394227	-0.192036	0.0419955	0.99246	0.887476	0.542245	0.840585	1.20383	1.18876	NM_029523	chr3:159192120-159192179	Depdc1a	Mus musculus DEP domain containing 1a (Depdc1a), transcript variant 2, mRNA [NM_029523]	GO:0005634|GO:0008150|GO:0003674|GO:0005096|GO:0007165|GO:0005575|GO:0005622	NM_029523	Mm.371655	76131	ENSMUST00000106041	TC1595319
A_52_P436238	0.0672751	1.59168	down	711.692	1138.45	3.21444	3.88499	1014.41	877.732	911.821	486.48	411.681	568.028	1020.19	1089.9	1305.26	3.71338	3.55711	3.69353	2.91198	2.91521	2.49545	3.77281	3.81396	4.0682	NM_013614	chr12:17554799-17554858	Odc1	Mus musculus ornithine decarboxylase, structural 1 (Odc1), mRNA [NM_013614]	GO:0001822|GO:0016829|GO:0005829|GO:0004586|GO:0006595|GO:0016831|GO:0009446|GO:0003824|GO:0006596|GO:0008284	NM_013614	Mm.34102	18263	ENSMUST00000011323	TC1573105
A_51_P185575	0.0109629	1.56182	up	252.85	175.782	1.79163	1.14841	276.465	239.181	231.976	252.014	207.601	309.863	116.431	194.989	215.925	1.83791	1.68143	1.71875	1.9631	1.9275	1.62111	0.641521	1.33123	1.47247	NM_144899	chr3:95480583-95480524	Adamtsl4	Mus musculus ADAMTS-like 4 (Adamtsl4), mRNA [NM_144899]	GO:0005576|GO:0003674|GO:0004222|GO:0030198|GO:0031012|GO:0008233|GO:0006915|GO:0005614	NM_144899	Mm.242781	229595	ENSMUST00000015994	TC1577440
A_51_P105927	0.00146537	1.83588	up	969.859	560.124	3.73127	2.8548	985.452	858.722	843.762	1055.63	877.623	1197.97	671.612	531.163	477.597	3.6716	3.52552	3.58161	4.02963	4.00729	3.572	3.16967	2.77699	2.61773	NM_001033158	chr9:65260445-65260504	Rasl12	Mus musculus RAS-like, family 12 (Rasl12), transcript variant 1, mRNA [NM_001033158]	GO:0016020|GO:0008150|GO:0003674|GO:0007264|GO:0005525|GO:0000166|GO:0007165|GO:0005575|GO:0003924	NM_001033158	Mm.35827	70784	ENSMUST00000085453
A_51_P497484	0.00574508	1.81879	down	34.7845	65.9551	-1.08267	-0.219689	34.6402	25.1171	34.1667	44.6937	30.1613	39.9278	60.5468	66.067	71.2515	-1.15867	-1.56993	-1.04456	-0.532259	-0.85554	-1.33505	-0.301837	-0.230163	-0.127067	NM_172923	chr9:55285737-55285796	AI118078	Mus musculus expressed sequence AI118078 (AI118078), mRNA [NM_172923]	GO:0016020|GO:0008150|GO:0003674|GO:0016021|GO:0005575	NM_172923	Mm.24361	244886	ENSMUST00000085754	TC1585749
A_52_P354844	0.0255488	1.79631	down	71.4693	132.969	-0.0693988	0.77564	64.7209	49.3945	51.6908	98.0946	71.3396	93.5752	103.547	149.13	146.231	-0.256884	-0.59425	-0.447247	0.601844	0.386464	-0.10632	0.472321	0.944409	0.91019	NM_001161432	chrX:94529517-94529458	Eda2r	Mus musculus ectodysplasin A2 receptor (Eda2r), transcript variant 1, mRNA [NM_001161432]	GO:0004872|GO:0012501|GO:0016020|GO:0003674|GO:0007275|GO:0030154|GO:0016021|GO:0005575	NM_001161432	Mm.189270	245527	ENSMUST00000037353
A_52_P18262	0.00327971	1.78737	up	73.0231	43.4814	0.00543253	-0.832403	67.9817	80.0151	62.7692	77.1554	69.2799	80.937	52.1947	37.2526	40.9968	-0.185968	0.101671	-0.167096	0.255438	0.344198	-0.315647	-0.515983	-1.05675	-0.924477	NM_019677	chr2:135298218-135298277	Plcb1	Mus musculus phospholipase C, beta 1 (Plcb1), transcript variant 2, mRNA [NM_019677]	GO:0008081|GO:0007165|GO:0042803|GO:0005509|GO:0004435|GO:0006629|GO:0016042|GO:0016787|GO:0004629|GO:0005624|GO:0005829|GO:0005737|GO:0004871	NM_019677	Mm.330607	18795	ENSMUST00000110116	TC1579823
A_51_P220055	0.00120489	2.49148	up	4239.67	1753.1	5.82901	4.51201	5715.64	4678.8	5182.72	3465.94	2918.25	3476.67	1931.84	1691.39	1636.08	6.20766	5.97139	6.20041	5.74477	5.74072	5.10912	4.69395	4.44798	4.39411	NM_172404	chr2:30040860-30040801	Ccbl1	Mus musculus cysteine conjugate-beta lyase 1 (Ccbl1), mRNA [NM_172404]	GO:0016212|GO:0008150|GO:0016740|GO:0016769|GO:0003824|GO:0030170|GO:0016829|GO:0003674|GO:0005737|GO:0009058|GO:0008483|GO:0047804|GO:0047316|GO:0005575|GO:0016847	NM_172404	Mm.216089	70266	ENSMUST00000113660	TC1587692
A_51_P508485	0.0121559	1.52819	down	680.005	1095.86	3.22415	3.83598	686.102	593.564	664.478	797.493	622.188	716.207	1022.03	1105.35	1160.21	3.14924	2.99273	3.237	3.62507	3.51104	2.82986	3.77541	3.83426	3.89826	NM_028651	chr14:123318495-123318436	Tmtc4	Mus musculus transmembrane and tetratricopeptide repeat containing 4 (Tmtc4), mRNA [NM_028651]	GO:0016020|GO:0008150|GO:0003674|GO:0005488|GO:0016021|GO:0005575	NM_028651	Mm.271988	70551	ENSMUST00000143189	TC1670645
A_52_P1034794	0.0372515	1.50829	up	131.84	92.4236	0.828993	0.236075	118.982	100.955	110.364	152.895	117.872	189.971	67.5555	115.381	94.3339	0.62156	0.437044	0.647046	1.24214	1.11091	0.91526	-0.143812	0.574247	0.277788	AK017390	chr15:36181270-36181211	5430434G16Rik	Mus musculus 6 days neonate head cDNA, RIKEN full-length enriched library, clone:5430434G16 product:unclassifiable, full insert sequence. [AK017390]	GO:0008150|GO:0003674|GO:0005575		Mm.440854	71385		TC1626159
A_51_P385099	0.000134625	1.86975	down	194.393	383.631	1.4194	2.32225	208.091	186.284	185.399	199.946	169.431	217.207	361.114	388.077	401.704	1.42803	1.32083	1.3954	1.62921	1.63438	1.10855	2.2745	2.32418	2.36807	NM_013693	chr17:35336854-35336795	Tnf	Mus musculus tumor necrosis factor (Tnf), mRNA [NM_013693]	GO:0050900|GO:0050806|GO:0007254|GO:0006954|GO:0005886|GO:0002037|GO:0008625|GO:0006917|GO:0016020|GO:0006927|GO:0045123|GO:0008284|GO:0008285|GO:0051023|GO:0001932|GO:0007275|GO:0044130|GO:0033209|GO:0007165|GO:0043525|GO:0006952|GO:0043123|GO:0051798|GO:0005887|GO:0060693|GO:0046325|GO:0032729|GO:0045941|GO:0006915|GO:0006959|GO:0000122|GO:0051222|GO:0045670|GO:0009887|GO:0055037|GO:0030141|GO:…	NM_013693	Mm.1293	21926	ENSMUST00000025263	TC1579092
A_51_P343556	0.000430998	1.51754	down	1338.67	2140.01	4.20067	4.80241	1366.53	1303.94	1315.21	1365.31	1111.5	1569.54	2024.48	2202.92	2192.62	4.14326	4.12813	4.22199	4.40076	4.34813	3.96175	4.76152	4.82918	4.81652	NM_175565	chr9:103256223-103256164	Cdv3	Mus musculus carnitine deficiency-associated gene expressed in ventricle 3 (Cdv3), transcript variant 1, mRNA [NM_175565]	GO:0005737	NM_175565	Mm.261025	321022	ENSMUST00000035484	TC1592895
A_52_P622874	0.0336621	1.63723	up	135.892	84.5649	0.849821	0.138564	184.512	169.021	163.582	97.2233	89.4324	111.579	85.5045	76.9728	91.2175	1.25453	1.18053	1.21479	0.588973	0.712558	0.147552	0.196114	-0.00974369	0.229323	AK088506	chr19:45836891-45836832	E330018D03Rik	Mus musculus 2 days neonate thymus thymic cells cDNA, RIKEN full-length enriched library, clone:E430019C04 product:unclassifiable, full insert sequence. [AK088506]			Mm.435821	320319		TC1583862
A_52_P254470	0.00160241	1.56654	up	82.7418	55.8332	0.187051	-0.460533	88.5694	86.7455	85.4902	72.7529	74.0735	88.8193	53.9484	52.115	61.4361	0.195694	0.218187	0.278606	0.170676	0.440717	-0.181573	-0.468307	-0.572393	-0.340901	NM_027884	chr1:74028854-74027593	Tns1	Mus musculus tensin 1 (Tns1), mRNA [NM_027884]	GO:0030055|GO:0016477|GO:0005925|GO:0007044|GO:0003779	NM_027884	Mm.309975	21961		TC1672187
A_52_P141715	0.00123731	2.033	up	75.2288	38.4484	0.0239668	-0.999644	90.8338	95.1545	80.6324	61.1932	53.0932	70.4661	40.9002	40.227	34.2182	0.232114	0.351669	0.194206	-0.078959	-0.039712	-0.515517	-0.867777	-0.94593	-1.18523	NM_207650	chr18:23804787-23805447	Dtna	Mus musculus dystrobrevin alpha (Dtna), transcript variant 1, mRNA [NM_207650]	GO:0005792|GO:0005515|GO:0046872|GO:0042383|GO:0030054|GO:0045202|GO:0005737|GO:0008270|GO:0016014|GO:0005509	NM_207650	Mm.94371	13527	ENSMUST00000115834	NP055298
A_51_P205907	0.00017522	2.41067	up	1812.01	791.623	4.63113	3.3617	1823.13	1652.65	1441.54	1916.6	1775.34	2262.78	890.345	785.69	698.833	4.55915	4.47003	4.35432	4.89007	5.02372	4.48951	3.57641	3.3418	3.16689	NM_001081185	chr6:29411109-29411168	Flnc	Mus musculus filamin C, gamma (Flnc), mRNA [NM_001081185]	GO:0030029|GO:0016020|GO:0005856|GO:0005737|GO:0003779|GO:0048747|GO:0015629	NM_001081185	Mm.39046	68794	ENSMUST00000065090	TC1603005
A_52_P440709	0.00226003	1.89718	up	188.897	106.352	1.37127	0.447416	199.107	220.63	159.07	161.999	179.331	213.245	127.738	110.405	80.913	1.36435	1.56495	1.17444	1.32558	1.71631	1.08199	0.775231	0.510635	0.0563831	NM_023868	chr13:11645871-11645812	Ryr2	Mus musculus ryanodine receptor 2, cardiac (Ryr2), mRNA [NM_023868]	GO:0006816|GO:0005515|GO:0004872|GO:0030018|GO:0006811|GO:0005216|GO:0005219|GO:0016021|GO:0006810|GO:0033017|GO:0031000	NM_023868	Mm.239871	20191	ENSMUST00000021750	TC1702902
A_52_P213483	0.0384468	2.36196	down	678.811	1505.37	3.04938	4.28937	1102.11	924.43	957.04	385.019	339.276	364.997	1406.18	1396.53	1713.4	3.833	3.63189	3.76335	2.57453	2.63615	1.85736	4.23575	4.17161	4.46073	AF045501	chr12:117100268-117100209		Mus musculus 6E6 monoclonal antibody heavy chain variable region, (IgH) mRNA, partial cds. [AF045501]			Mm.313480		ENSMUST00000109705	NP049389
A_52_P416756	0.00160675	1.80121	down	631.69	1187.59	3.10386	3.95283	805.947	663.109	682.185	581.412	461.765	595.724	1123.81	1210.95	1228.02	3.3815	3.15257	3.27494	3.16916	3.08085	2.56413	3.91236	3.96591	3.98021	AK075966	chr17:35134712-35134653	D17H6S56E-5	Mus musculus 13 days embryo liver cDNA, RIKEN full-length enriched library, clone:2510003D08 product:G7e protein, full insert sequence. [AK075966]	GO:0019031		Mm.22506	110956		TC1654577
A_51_P472829	0.0143126	2.24556	down	185.591	418.092	1.27993	2.447	145.372	126.476	113.122	257.211	221.445	249.922	399.073	426.196	429.008	0.910561	0.762193	0.682651	1.99255	2.02064	1.31096	2.41869	2.45935	2.46294	NM_145144	chr2:31828806-31828865	Aif1l	Mus musculus allograft inflammatory factor 1-like (Aif1l), mRNA [NM_145144]	GO:0016020|GO:0008150|GO:0003674|GO:0042995|GO:0005886|GO:0043234|GO:0005856|GO:0005737|GO:0003779|GO:0005509	NM_145144	Mm.24838	108897	ENSMUST00000001920	TC1575594
A_51_P465211	0.00351855	1.53961	up	44270.1	30305	9.24721	8.62464	46724	37949.1	46319.9	47110.2	37842.9	49674.7	28710.1	32945.6	29259.2	9.23883	8.99125	9.36027	9.50949	9.43757	8.94585	8.58746	8.73178	8.55469	NM_026323	chr2:164393935-164393994	Wfdc2	Mus musculus WAP four-disulfide core domain 2 (Wfdc2), mRNA [NM_026323]	GO:0005576|GO:0008150|GO:0003674|GO:0004867|GO:0030414|GO:0005575	NM_026323	Mm.27289	67701	ENSMUST00000109343	TC1579380
A_51_P489503	0.0632005	3.83345	down	462.621	1317.93	2.16373	4.10238	151.989	115.46	136.488	887.021	710.214	774.555	1228.61	1378.01	1347.16	0.97478	0.630719	0.953548	3.77857	3.70194	2.94285	4.04099	4.15235	4.11379	NM_175263	chr11:120515580-120515521	Notum	Mus musculus notum pectinacetylesterase homolog (Drosophila) (Notum), mRNA [NM_175263]	GO:0005576|GO:0016787|GO:0008150|GO:0003674|GO:0005575	NM_175263	Mm.32839	77583	ENSMUST00000106177	TC1588352
A_51_P206585	0.0204559	1.53685	down	52.2392	83.8526	-0.494538	0.125437	60.2689	39.1082	45.2578	63.543	45.8942	59.3629	74.9253	86.6158	90.0168	-0.359703	-0.931131	-0.638985	-0.0245967	-0.249927	-0.762884	0.00556755	0.160538	0.210206	NM_009821	chr16:92604472-92604413	Runx1	Mus musculus runt related transcription factor 1 (Runx1), transcript variant 4, mRNA [NM_009821]	GO:0005515|GO:0001889|GO:0003700|GO:0006350|GO:0030097|GO:0001701|GO:0005524|GO:0030182|GO:0048666|GO:0048266|GO:0035162|GO:0006355|GO:0045449|GO:0001501|GO:0005634|GO:0045766|GO:0007417|GO:0003677|GO:0032526|GO:0060216	NM_009821	Mm.4081	12394	ENSMUST00000113956	TC1583025
A_52_P444368	0.0295155	1.57795	up	176.926	115.853	1.24695	0.588896	237.458	200.571	212.208	132.501	126.775	152.04	107.966	132.713	106.879	1.61849	1.42744	1.59025	1.0356	1.21595	0.593936	0.532617	0.776149	0.457921	NM_033604	chr9:70350806-70350747	Rnf111	Mus musculus ring finger 111 (Rnf111), mRNA [NM_033604]	GO:0007389|GO:0046332|GO:0005634|GO:0005515|GO:0046872|GO:0007275|GO:0005737|GO:0008270|GO:0016874	NM_033604	Mm.29783	93836	ENSMUST00000113595	TC1615560
A_51_P492366	0.041749	1.53601	down	399.761	635.024	2.43104	3.05022	349.814	300.743	312.824	507.024	414.243	513.918	636.499	613.324	655.247	2.1774	2.01186	2.15013	2.97165	2.92417	2.35102	3.0922	2.98449	3.07398	NM_007557	chr2:172695341-172695282	Bmp7	Mus musculus bone morphogenetic protein 7 (Bmp7), mRNA [NM_007557]	GO:0045746|GO:0051216|GO:0040007|GO:0001503|GO:0009887|GO:0048593|GO:0031988|GO:0030154|GO:0048754|GO:0045666|GO:0035239|GO:0008083|GO:0045597|GO:0042325|GO:0060687|GO:0050768|GO:0001654|GO:0070700|GO:0060686|GO:0060485|GO:0009880|GO:0048646|GO:0008285|GO:0001657|GO:0007389|GO:0005576|GO:0005515|GO:0048468|GO:0030509|GO:0005125|GO:0072040|GO:0007275|GO:0005615|GO:0030855|GO:0045944|GO:0048596|GO:…	NM_007557	Mm.595	12162	ENSMUST00000009143	TC1581559
A_51_P334093	0.0253196	2.17401	down	84.7712	180.589	0.107683	1.22804	129.316	109.927	112.845	54.2829	46.8111	55.4454	185.208	154.854	201.705	0.741718	0.559867	0.679113	-0.251833	-0.221389	-0.861378	1.31119	0.998745	1.37418	NM_026228	chr3:135549902-135549961	Slc39a8	Mus musculus solute carrier family 39 (metal ion transporter), member 8 (Slc39a8), transcript variant 3, mRNA [NM_026228]	GO:0030001|GO:0016020|GO:0055085|GO:0006811|GO:0046873|GO:0016021|GO:0006829|GO:0006810	NM_026228	Mm.30239	67547	ENSMUST00000081978	TC1649661
A_51_P369862	1.38115e-05	2.02652	down	1998.97	4245.2	4.77255	5.79155	2126.77	2157.82	2159.4	1803.44	1499.48	2246.92	4325.17	4177.36	4233.07	4.7814	4.85483	4.93733	4.80227	4.78008	4.47936	5.85673	5.75235	5.76557	NM_178772	chr3:27143709-27143768	Nceh1	Mus musculus arylacetamide deacetylase-like 1 (Nceh1), mRNA [NM_178772]	GO:0005792|GO:0016042|GO:0042301|GO:0016787|GO:0016020|GO:0008152|GO:0004091|GO:0006805|GO:0017171|GO:0016021|GO:0006470|GO:0005783	NM_178772	Mm.24576	320024	ENSMUST00000046515	TC1763056
A_51_P423709	0.0965038	1.93211	down	193.637	354.073	1.25318	2.20336	121.362	97.4433	104.057	301.503	240.169	297.285	316.305	362.707	383.208	0.650135	0.385961	0.562155	2.22177	2.13774	1.56133	2.08336	2.22664	2.30007	NM_029007	chr12:14154930-14154871	Fam84a	Mus musculus family with sequence similarity 84, member A (Fam84a), mRNA [NM_029007]		NM_029007	Mm.227253	105005	ENSMUST00000020926	NP1218017
A_51_P349888	0.0445242	4.34016	down	548.81	1974.47	2.4161	4.53385	1080.52	846.746	866.076	160.144	119.825	219.548	884.56	2367.05	2671.8	3.80447	3.50526	3.61927	1.30897	1.13461	1.12402	3.567	4.93285	5.10168	NM_007449	chr14:51815374-51815315	Ang2	Mus musculus angiogenin, ribonuclease A family, member 2 (Ang2), mRNA [NM_007449]	GO:0004519|GO:0003676|GO:0016787|GO:0004518|GO:0004522	NM_007449	Mm.377077	11731	ENSMUST00000051274	NP382325
A_52_P156314	0.0208176	1.86696	up	51.4097	27.6584	-0.572563	-1.47326	74.4239	57.6416	68.0056	38.4037	29.2561	40.7272	27.862	29.7171	25.396	-0.0553489	-0.371493	-0.0514994	-0.751084	-0.899503	-1.30645	-1.42159	-1.3828	-1.61539	NM_207707	chr12:77222370-77222311	Esr2	Mus musculus estrogen receptor 2 (beta) (Esr2), transcript variant 1, mRNA [NM_207707]	GO:0006350|GO:0043204|GO:0001541|GO:0003707|GO:0045449|GO:0045885|GO:0005634|GO:0001662|GO:0046872|GO:0001764|GO:0004879|GO:0003677|GO:0008270|GO:0042562|GO:0008285|GO:0004872|GO:0003700|GO:0050680|GO:0060065|GO:0007420|GO:0045944|GO:0005739|GO:0006355|GO:0060740|GO:0033574|GO:0060068|GO:0043065|GO:0042127|GO:0008289|GO:0043565|GO:0007611|GO:0043526|GO:0043005|GO:0060743|GO:0030520|GO:0005737|GO:…	NM_207707	Mm.2561	13983	ENSMUST00000076634	NP723042
A_51_P246119	0.021822	1.90826	down	474.172	924.795	2.65466	3.58692	348.613	297.521	427.923	622.843	511.969	636.162	809.861	956.996	1007.53	2.17244	1.99632	2.60213	3.26847	3.22975	2.65888	3.43972	3.62635	3.69469	NM_001081363	chr1:191465993-191465934	Cenpf	Mus musculus centromere protein F (Cenpf), mRNA [NM_001081363]	GO:0070201|GO:0016202|GO:0002724|GO:0055037|GO:0043066|GO:0032386|GO:0005634|GO:0003674|GO:0045120|GO:0045787|GO:0005802|GO:0000776|GO:0030885|GO:0008284|GO:0050863|GO:0005515|GO:0002730|GO:0032886|GO:0010389|GO:0007507|GO:0000775|GO:0048471|GO:0005737|GO:0048866|GO:0005813	NM_001081363	Mm.129746	108000	ENSMUST00000027900	TC1637499
A_52_P213527	0.000532023	1.79797	down	385.69	728.537	2.40022	3.24658	459.845	395.935	389.592	384.122	292.369	392.28	723.744	679.989	781.879	2.57196	2.40859	2.46674	2.57116	2.42148	1.96137	3.27752	3.13335	3.32889	XM_001476823	chr6:69135068-69135009		predicted gene 10880 Gene [Source:MGI Symbol;Acc:MGI:3779447] [ENSMUST00000103344]		XM_001476823	Mm.449734		ENSMUST00000103344	NP050934
A_51_P303749	0.00835935	1.61077	down	345.184	580.961	2.23434	2.92209	294.809	289.28	313.1	404.277	331.273	438.368	595.51	567.098	580.275	1.93059	1.95579	2.1514	2.64494	2.60171	2.12162	2.99617	2.87143	2.89868	NM_178683	chr13:109179573-109179632	Depdc1b	Mus musculus DEP domain containing 1B (Depdc1b), mRNA [NM_178683]	GO:0008150|GO:0003674|GO:0005096|GO:0007165|GO:0005575|GO:0005622	NM_178683	Mm.32318	218581	ENSMUST00000051594	TC1582514
A_51_P335969	0.00112767	2.08195	up	6439.1	3324.37	6.46939	5.41146	6746.8	6495.32	5540.74	6455.29	6181.58	7214.87	4246.23	3030.35	2696.54	6.44694	6.44465	6.29678	6.64201	6.82359	6.16238	5.83015	5.28925	5.11498	NM_010043	chr1:75363404-75363629	Des	Mus musculus desmin (Des), mRNA [NM_010043]	GO:0005515|GO:0005882|GO:0007517|GO:0030018|GO:0042383|GO:0005626|GO:0005198|GO:0043292|GO:0005200|GO:0045202|GO:0005737|GO:0005856|GO:0045098|GO:0005622	NM_010043	Mm.6712	13346	ENSMUST00000027409	TC1572490
A_51_P476757	0.0631561	2.06128	down	2947.55	5650.34	5.15951	6.20305	4862.53	3958.91	4148.13	1617.45	1286.45	1811.81	5870.39	5343	5737.64	5.97445	5.73036	5.87917	4.64524	4.55901	4.16884	6.29743	6.10741	6.20432	XM_905362	chr12:116383778-116383719		Ig heavy chain V region 23 Precursor [Source:UniProtKB/Swiss-Prot;Acc:P01748] [ENSMUST00000103523]		XM_905362	Mm.361298		ENSMUST00000103522	NP1216382
A_52_P14626	0.000695979	1.82392	down	439.09	835.183	2.57878	3.44582	531.702	482.107	485.161	385.691	314.305	435.575	825.423	824.624	855.503	2.78143	2.69268	2.78324	2.57704	2.52586	2.1124	3.46718	3.41157	3.45871	XM_001476590	chr6:69218100-69218041	LOC100047316	predicted gene 1502 Gene [Source:MGI Symbol;Acc:MGI:2686348] [ENSMUST00000103348]		XM_001476590	Mm.333130	100047316	ENSMUST00000103348	NP049355
A_51_P345121	0.00743956	1.79633	down	58.2382	108.399	-0.344955	0.500101	70.597	71.0659	67.056	50.6492	42.055	48.0059	105.903	109.943	109.353	-0.131508	-0.0694442	-0.0717869	-0.351791	-0.375962	-1.06924	0.504786	0.50459	0.490926	NM_001081110	chr6:71327330-71327389	Cd8a	Mus musculus CD8 antigen, alpha chain (Cd8a), transcript variant 1, mRNA [NM_001081110]	GO:0002456|GO:0016020|GO:0007166|GO:0042110|GO:0009986|GO:0045065|GO:0009897|GO:0042803|GO:0016021|GO:0050850	NM_001081110	Mm.1858	12525		NP570089
A_51_P254425	0.000905803	1.76471	down	98.0122	180.754	0.418064	1.2375	119.625	99.4823	111.963	82.4103	75.5775	99.0149	174.33	183.111	184.822	0.629335	0.415837	0.667798	0.350494	0.469717	-0.0248008	1.22386	1.24055	1.24808	NM_009644	chr13:74348612-74348566	Ahrr	Mus musculus aryl-hydrocarbon receptor repressor (Ahrr), mRNA [NM_009644]	GO:0006350|GO:0010553|GO:0006805|GO:0033235|GO:0006355|GO:0007165|GO:0045449|GO:0030528|GO:0005634|GO:0009410|GO:0003677|GO:0005737|GO:0004871|GO:0016564	NM_009644	Mm.290446	11624	ENSMUST00000022059	TC1579597
A_52_P420466	0.00550776	1.52997	down	71.6086	114.655	-0.032644	0.580863	88.4679	69.5001	80.7753	58.671	59.4336	72.8037	113.066	112.519	118.381	0.194039	-0.101587	0.196761	-0.139681	0.123039	-0.468434	0.599208	0.538003	0.605378	NM_175660	chr13:23843392-23843451	Hist1h2ab	Mus musculus histone cluster 1, H2ab (Hist1h2ab), mRNA [NM_175660]	GO:0005634|GO:0003677|GO:0000786|GO:0005694|GO:0006334	NM_175660	Mm.423402	319172	ENSMUST00000078369	TC1594441
A_52_P478420	0.00101139	1.66029	up	202.115	126.493	1.45259	0.721156	242.977	228.226	219.247	164.035	138.646	219.559	131.711	130.15	117.617	1.65163	1.61379	1.63733	1.3436	1.3451	1.12409	0.819423	0.748007	0.596039	AK086555	chr15:82205978-82205919	Cyp2d22	Mus musculus 15 days embryo head cDNA, RIKEN full-length enriched library, clone:D930036L18 product:cytochrome P450, family 2, subfamily d, polypeptide 22, full insert sequence. [AK086555]	GO:0017144|GO:0046872|GO:0042417|GO:0005737|GO:0016491|GO:0008391|GO:0004497|GO:0004509|GO:0019369|GO:0055114			56448		TC1589783
A_51_P323579	0.0208395	1.68559	down	53.936	90.6935	-0.517273	0.235984	77.2875	63.0283	58.9736	34.8912	26.7308	62.7047	90.9257	79.6703	101.485	-0.000880718	-0.242602	-0.257083	-0.889467	-1.02974	-0.683872	0.284803	0.0399494	0.383201	NM_023794	chr16:22383465-22383406	Etv5	Mus musculus ets variant gene 5 (Etv5), mRNA [NM_023794]	GO:0005634|GO:0043565|GO:0016563|GO:0003700|GO:0060762|GO:0048133|GO:0003677|GO:0045941|GO:0045666|GO:0060252|GO:0006355	NM_023794	Mm.155708	104156	ENSMUST00000051229	TC1572047
A_52_P681310	0.00958344	1.53837	down	915.519	1475.31	3.64423	4.26563	854.502	771.924	783.03	1032.27	894.621	1156.77	1419.81	1444.39	1561.71	3.4659	3.37178	3.47384	3.99735	4.03496	3.52151	4.24967	4.22023	4.32699	NM_011113	chr7:25260569-25260628	Plaur	Mus musculus plasminogen activator, urokinase receptor (Plaur), mRNA [NM_011113]	GO:0005576|GO:0004872|GO:0016020|GO:0005886|GO:0016301|GO:0031225|GO:0030377	NM_011113	Mm.1359	18793	ENSMUST00000002284	TC1581513
A_51_P333438	0.0519219	1.57486	up	609.889	401.388	3.03602	2.3808	512.204	508.815	418.686	702.734	716.812	800.081	426.624	434.634	342.906	2.72753	2.77047	2.57064	3.44258	3.71528	2.98963	2.51501	2.48764	2.13975		chr9:79662971-79662912		Q8K4T4_RAT (Q8K4T4) Filamin-interacting protein L-FILIP, partial (22%) [TC1651696]						TC1651696
A_51_P114714	0.0267902	1.50613	down	329.181	518.277	2.16614	2.75699	303.163	288.384	257.411	396.136	336.655	393.334	496.078	530.426	528.327	1.97091	1.95132	1.86885	2.61559	2.62496	1.96524	2.73261	2.77499	2.76337	NM_023233	chr14:62224541-62224600	Trim13	Mus musculus tripartite motif-containing 13 (Trim13), transcript variant 2, mRNA [NM_023233]	GO:0005515|GO:0046872|GO:0005737|GO:0008270|GO:0005622	NM_023233	Mm.479263	66597	ENSMUST00000039562	TC1580412
A_51_P501844	0.000261327	2.28669	up	352.39	160.304	2.25619	1.06293	288.903	392.486	270.54	377.185	316.61	468.616	169.855	150.177	160.88	1.9014	2.39597	1.94062	2.54487	2.53639	2.21789	1.18635	0.9545	1.04793	NM_175475	chr6:84522011-84521952	Cyp26b1	Mus musculus cytochrome P450, family 26, subfamily b, polypeptide 1 (Cyp26b1), transcript variant 1, mRNA [NM_175475]	GO:0001709|GO:0046872|GO:0009954|GO:0030326|GO:0048384|GO:0007283|GO:0042573|GO:0007140	NM_175475	Mm.255246	232174	ENSMUST00000077705	TC1583864
A_51_P102096	0.00853199	1.61194	down	2816.5	4776.36	5.26914	5.95794	2800.91	2365.93	2462.07	3350.64	2691.08	3228.38	4376.73	4724.27	5228.07	5.17864	4.98766	5.12658	5.69596	5.6238	5.00222	5.87383	5.92985	6.07015	NM_010849	chr15:61821516-61821576	Myc	Mus musculus myelocytomatosis oncogene (Myc), transcript variant 1, mRNA [NM_010849]	GO:0050910|GO:0046982|GO:0006350|GO:0008633|GO:0016604|GO:0006309|GO:0005730|GO:0045449|GO:0005634|GO:0043473|GO:0003677|GO:0006919|GO:0006351|GO:0008284|GO:0010468|GO:0005819|GO:0003700|GO:0010553|GO:0045944|GO:0032091|GO:0048705|GO:0042981|GO:0030424|GO:0043085|GO:0042474|GO:0001836|GO:0003690|GO:0006355|GO:0006366|GO:0001783|GO:0030528|GO:0006006|GO:0043565|GO:0043279|GO:0007346|GO:0002904|GO:…	NM_010849	Mm.2444	17869	ENSMUST00000022971	TC1574039
A_52_P131548	0.0175035	2.13118	down	172.247	367.582	1.16834	2.25999	133.622	106.963	114.74	238.576	192.749	246.829	351.258	356.237	395.252	0.788974	0.520442	0.703141	1.88405	1.82041	1.293	2.23457	2.20067	2.34471	NM_010590	chr14:55186871-55186812	Jub	Mus musculus ajuba (Jub), mRNA [NM_010590]	GO:0048041|GO:0005515|GO:0005886|GO:0007049|GO:0030334|GO:0030027|GO:0005634|GO:0035313|GO:0046872|GO:0007155|GO:0016020|GO:0030054|GO:0030032|GO:0043087|GO:0005737|GO:0005856|GO:0005925|GO:0008270	NM_010590	Mm.100253	16475	ENSMUST00000054487	TC1593184
A_52_P104581	0.0380026	1.51443	down	2859.35	4361.84	5.22954	5.82832	3498.92	3396.93	3664.43	1817.91	1601.83	3176.09	4697.43	4315.67	4072.43	5.49965	5.50948	5.70029	4.81381	4.87534	4.97866	5.97584	5.79935	5.70976	NM_029741	chr7:52594801-52594742	Ppfia3	Mus musculus protein tyrosine phosphatase, receptor type, f polypeptide (PTPRF), interacting protein (liprin), alpha 3 (Ppfia3), mRNA [NM_029741]	GO:0005737	NM_029741	Mm.277235	76787	ENSMUST00000094439	TC1581164
A_51_P469942	7.54295e-05	2.55439	up	69.0713	28.2885	-0.0874035	-1.44038	65.2035	67.4822	54.0894	64.2918	71.1982	92.163	29.3253	29.6163	25.9239	-0.246165	-0.144095	-0.381807	-0.00769567	0.383601	-0.128259	-1.34774	-1.3877	-1.58571	NM_145136	chr11:64990465-64990406	Myocd	Mus musculus myocardin (Myocd), transcript variant A, mRNA [NM_145136]	GO:0003676|GO:0051150|GO:0005515|GO:0046982|GO:0006350|GO:0042826|GO:0035065|GO:0001570|GO:0045661|GO:0001560|GO:0051145|GO:0045944|GO:0042692|GO:0007507|GO:0042803|GO:0045449|GO:0035035|GO:0003713|GO:0005634|GO:0016563|GO:0045941|GO:0006357|GO:0000122|GO:0008284	NM_145136	Mm.32257	214384	ENSMUST00000108695	TC1595366
A_51_P252859	0.000451696	1.57678	down	664.599	1103.24	3.18968	3.84665	760.128	651.603	642.164	601.2	575.91	756.587	1159.16	1086.5	1064.07	3.29705	3.12732	3.18772	3.21744	3.39953	2.90899	3.95705	3.80945	3.77346	NM_010516	chr3:145310246-145310187	Cyr61	Mus musculus cysteine rich protein 61 (Cyr61), mRNA [NM_010516]	GO:0005515|GO:0005576|GO:0005520|GO:0060716|GO:0002041|GO:0051789|GO:0001558|GO:0007155|GO:0010811|GO:0006935|GO:0019838|GO:0030198|GO:0050840|GO:0060710|GO:0008201	NM_010516	Mm.1231	16007	ENSMUST00000029846	TC1572761
A_51_P285725	0.00557271	2.8032	down	34.4314	94.937	-1.18305	0.304027	23.0881	23.0547	20.2714	45.7874	37.501	56.886	84.2523	98.28	102.279	-1.74396	-1.69354	-1.79771	-0.497381	-0.541311	-0.824372	0.17483	0.342805	0.394447	NM_009309	chr17:8634870-8634929	T	Mus musculus brachyury (T), mRNA [NM_009309]	GO:0005515|GO:0003700|GO:0006350|GO:0001570|GO:0007275|GO:0030903|GO:0045944|GO:0001839|GO:0001843|GO:0006355|GO:0045449|GO:0060395|GO:0005634|GO:0043565|GO:0003677|GO:0005737|GO:0009653|GO:0001756|GO:0009952|GO:0008284	NM_009309	Mm.913	20997	ENSMUST00000074667	TC1586132
A_51_P328275	0.000130353	4.89014	down	53.6571	263.834	-0.507739	1.78214	78.0246	62.6407	67.7034	41.6627	30.9702	40.9412	253.227	257.883	280.392	0.012814	-0.251503	-0.0579257	-0.633572	-0.817358	-1.29889	1.76248	1.73455	1.84938	AF296421	chr12:115947007-115946948	LOC100048770	Mus musculus clone J558.B4 immunoglobulin heavy chain variable region mRNA, partial cds. [AF296421]			Mm.379534	100048770	ENSMUST00000103505	NP614463
A_51_P367462	0.000492272	2.25685	down	64.3098	152.468	-0.189198	0.98511	76.7473	58.3737	74.2095	67.4566	48.0256	61.046	131.326	164.218	161.861	-0.0109992	-0.353284	0.07445	0.0616302	-0.184436	-0.72255	0.815192	1.08344	1.05669	AF006582	chr12:114826537-114826478		predicted gene 9145 Gene [Source:MGI Symbol;Acc:MGI:3643263] [ENSMUST00000103443]			Mm.462717		ENSMUST00000103443	NP921753
A_51_P178772	0.00139629	2.78899	down	1766.33	4843.18	4.49921	5.97895	2098.38	2346.57	2160.4	906.458	928.65	2157.51	5220.46	4473.02	4836.06	4.76201	4.97581	4.938	3.80984	4.08882	4.42078	6.12815	5.85101	5.9577	NM_144930	chr8:95780284-95780225	AU018778	Mus musculus expressed sequence AU018778 (AU018778), mRNA [NM_144930]	GO:0016787|GO:0004091	NM_144930	Mm.29110	234564	ENSMUST00000034178	TC1578464
A_51_P145220	0.000791552	1.54647	up	64.3735	43.7195	-0.184409	-0.813392	64.7085	63.7627	54.555	62.4343	56.893	83.8878	48.073	40.6734	42.4122	-0.25716	-0.225888	-0.369442	-0.0499911	0.0600119	-0.263986	-0.634658	-0.930008	-0.875508	NM_008691	chr14:68738252-68738193	Nefm	Mus musculus neurofilament, medium polypeptide (Nefm), mRNA [NM_008691]	GO:0031594|GO:0045104|GO:0005882|GO:0045110|GO:0005883|GO:0000226|GO:0060052|GO:0031133|GO:0005856|GO:0008088|GO:0030424|GO:0005198	NM_008691	Mm.390700	18040	ENSMUST00000022638	TC1574924
A_52_P615247	0.00219067	1.74658	down	463.085	852.106	2.66926	3.47379	542.136	506.107	461.965	410.259	419.812	438.234	804.053	880.49	871.775	2.80947	2.76277	2.71256	2.66613	2.94343	2.12118	3.42933	3.50614	3.4859	AK087744	chr1_random:751383-751324		RIKEN cDNA A530040E14 gene Gene [Source:MGI Symbol;Acc:MGI:3612703] [ENSMUST00000113384]			Mm.436517		ENSMUST00000111365	TC1581465
A_51_P170807	0.0107933	1.57787	up	2004.72	1313.41	4.75555	4.09757	1659.19	1863.16	1517.7	2327.41	1789.21	2871.63	1379.14	1330.44	1230.66	4.42322	4.64301	4.42859	5.17025	5.03494	4.83328	4.20774	4.10166	3.98331	AB021861	chr4:132808784-132808843	Map3k6	Mus musculus ASK2 mRNA for apoptosis signal-regulating kinase 2, complete cds. [AB021861]	GO:0004672|GO:0005515|GO:0046872|GO:0004674|GO:0005524|GO:0016740|GO:0016301|GO:0006468|GO:0000166|GO:0004709		Mm.36640	53608
A_51_P298802	0.00422668	1.69549	down	187.186	334.052	1.36156	2.12326	181.626	177.214	158.901	178.661	208.655	218.06	321.332	347.65	333.173	1.23179	1.24882	1.1729	1.46682	1.93481	1.11421	2.10611	2.16547	2.09821	NM_001002896	chr9:103327283-103327254	Bfsp2	Mus musculus beaded filament structural protein 2, phakinin (Bfsp2), mRNA [NM_001002896]	GO:0005882|GO:0016020|GO:0007010|GO:0005856|GO:0005737|GO:0007601|GO:0005198|GO:0050896|GO:0005212	NM_001002896	Mm.335403	107993	ENSMUST00000035165	TC1581862
A_51_P254855	0.000152559	2.87469	down	86.4068	266.003	0.248591	1.772	96.4406	73.7407	79.954	86.9911	87.6849	93.6298	202.563	286.272	309.175	0.318525	-0.0161419	0.182017	0.428537	0.684089	-0.105478	1.44041	1.88522	1.99036	NM_011198	chr1:151954744-151954803	Ptgs2	Mus musculus prostaglandin-endoperoxide synthase 2 (Ptgs2), mRNA [NM_011198]	GO:0004601|GO:0004666|GO:0006954|GO:0005634|GO:0046872|GO:0016020|GO:0008217|GO:0001516|GO:0042640|GO:0020037|GO:0046697|GO:0016702|GO:0008285|GO:0005792|GO:0034097|GO:0008610|GO:0005515|GO:0030728|GO:0051968|GO:0051926|GO:0006633|GO:0005901|GO:0007613|GO:0045987|GO:0045907|GO:0043234|GO:0016491|GO:0030282|GO:0030216|GO:0031915|GO:0043065|GO:0042127|GO:0032227|GO:0006979|GO:0008289|GO:0048661|GO:…	NM_011198	Mm.292547	19225	ENSMUST00000035065	TC1575619
A_52_P465669	0.00522768	1.55506	down	35.6101	57.8004	-1.04592	-0.408953	29.3358	41.0731	30.6474	39.8857	28.8558	43.8628	54.6341	62.0088	56.7584	-1.39845	-0.860406	-1.20139	-0.696457	-0.919378	-1.19945	-0.450085	-0.32162	-0.455153		chr6:64122690-64122518
A_52_P505143	0.0500863	1.61546	down	132.136	215.143	0.79652	1.48846	184.971	171.04	157.24	95.5901	80.9065	103.067	211.293	225.113	209.025	1.25811	1.19766	1.15774	0.564532	0.568016	0.0330634	1.50128	1.53849	1.42561	NM_008415	chr15:74535526-74535467	Jrk	Mus musculus jerky (Jrk), mRNA [NM_008415]	GO:0005840|GO:0003676|GO:0005634|GO:0000775|GO:0003729|GO:0003677|GO:0005737|GO:0030529|GO:0045449	NM_008415	Mm.87052	16469	ENSMUST00000050234	TC1577101
A_51_P273667	0.0122618	2.21026	down	429.74	952.676	2.48916	3.63338	305.35	317.2	268.589	585.076	470.415	631.806	936.32	892.522	1029.19	1.98128	2.08872	1.93018	3.17822	3.10762	2.64896	3.64904	3.52572	3.72537	NM_011441	chr1:4481949-4481890	Sox17	Mus musculus SRY-box containing gene 17 (Sox17), mRNA [NM_011441]	GO:0003700|GO:0006350|GO:0001570|GO:0003705|GO:0035050|GO:0001947|GO:0060214|GO:0001525|GO:0045449|GO:0030178|GO:0005634|GO:0010843|GO:0003677|GO:0045893|GO:0060956	NM_011441	Mm.279103	20671	ENSMUST00000116652	TC1595463
A_51_P304607	0.000293242	1.79853	down	204.1	387.375	1.47952	2.32634	210.53	181.698	227.097	203.251	156.888	245.136	322.711	434.533	404.879	1.44484	1.28487	1.68809	1.65286	1.52343	1.28307	2.11229	2.4873	2.37943	NM_145551	chr4:111548938-111548879	Slc5a9	Mus musculus solute carrier family 5 (sodium/glucose cotransporter), member 9 (Slc5a9), mRNA [NM_145551]	GO:0005215|GO:0016020|GO:0008150|GO:0003674|GO:0006814|GO:0055085|GO:0006811|GO:0016021|GO:0005575|GO:0006810	NM_145551	Mm.26630	230612	ENSMUST00000102720	TC1584530
A_51_P393518	0.005146	1.56666	up	93.4202	62.4176	0.350374	-0.297315	107.037	103.643	104.444	87.929	68.1254	89.3436	59.7054	61.5446	66.0028	0.468916	0.474946	0.567499	0.44401	0.319953	-0.173082	-0.322026	-0.332459	-0.237462	NM_001024720	chr1:152410493-152410434	Hmcn1	Mus musculus hemicentin 1 (Hmcn1), mRNA [NM_001024720]	GO:0005576|GO:0008150|GO:0003674|GO:0030054|GO:0005604|GO:0005938	NM_001024720	Mm.379425	545370	ENSMUST00000074783	TC1604028
A_51_P168646	0.0129735	1.81682	up	323.91	182.457	2.11097	1.24955	247.328	286.735	218.934	356.651	351.013	482.801	194.898	171.793	180.681	1.67724	1.94304	1.63527	2.46411	2.68521	2.26091	1.38476	1.14851	1.21538	AK149219	chr14:68706866-68706925	Nefl	neurofilament, light polypeptide Gene [Source:MGI Symbol;Acc:MGI:97313] [ENSMUST00000022639]	GO:0005515|GO:0048812|GO:0005882|GO:0043524|GO:0045110|GO:0014012|GO:0000226|GO:0060052|GO:0031133|GO:0005198|GO:0030424|GO:0051258|GO:0019904|GO:0040011|GO:0043274|GO:0043005|GO:0005883|GO:0050772|GO:0045109|GO:0050885		Mm.1956	18039	ENSMUST00000022639	TC1607814
A_51_P365008	0.0103812	1.84492	up	14587.3	8463.83	7.63615	6.75259	13081.7	15018.6	10866	14543.3	16040.2	17973.9	11080.3	7684.26	6626.96	7.40222	7.65393	7.26845	7.81381	8.19924	7.47924	7.21389	6.63167	6.41222	NM_027884	chr1:73956907-73956848	Tns1	Mus musculus tensin 1 (Tns1), mRNA [NM_027884]	GO:0030055|GO:0016477|GO:0005925|GO:0007044|GO:0003779	NM_027884	Mm.309975	21961		TC1702789
A_52_P578634	0.00338051	1.69096	up	6289.86	3889.35	6.42231	5.66446	7705.73	6385	7057.55	6087.27	4626.35	5877.28	3693.48	3997.13	3977.45	6.63867	6.41994	6.64587	6.55732	6.40549	5.86656	5.62895	5.68873	5.67571	NM_033612	chr15:100515073-100515014	Cela1	Mus musculus chymotrypsin-like elastase family, member 1 (Cela1), mRNA [NM_033612]	GO:0016787|GO:0008236|GO:0008233	NM_033612	Mm.2131	109901	ENSMUST00000023775	TC1696591
A_51_P144303	0.000585909	1.7626	up	76.0972	45.3454	0.0546389	-0.763069	93.554	81.8065	74.2359	62.4795	61.562	82.9456	51.2489	43.1441	41.6431	0.274685	0.133613	0.0749636	-0.0489473	0.1738	-0.280281	-0.542366	-0.84493	-0.90191	BC138739	chr8:86193681-86193740	Ptger1	Mus musculus prostaglandin E receptor 1 (subtype EP1), mRNA (cDNA clone MGC:170366 IMAGE:8861761), complete cds. [BC138739]	GO:0004872|GO:0016020|GO:0004930|GO:0005886|GO:0007186|GO:0004871|GO:0004957|GO:0004955|GO:0016021|GO:0007165		Mm.474430	19216
A_51_P501002	0.00100782	1.54708	up	42.2537	28.3437	-0.811197	-1.44075	38.394	41.136	45.0844	42.2833	28.0664	58.5579	28.8417	31.139	25.0506	-1.01024	-0.858199	-0.644525	-0.612243	-0.959396	-0.782583	-1.37173	-1.31537	-1.63514	AK017575	chr1:78591754-78591695	5730419F03Rik	Mus musculus 8 days embryo whole body cDNA, RIKEN full-length enriched library, clone:5730419F03 product:unclassifiable, full insert sequence. [AK017575]	GO:0008150|GO:0003674|GO:0005575		Mm.462998	70537		NP741061
A_52_P512955	0.00171546	1.66696	down	82.8319	146.119	0.186517	0.923741	84.7995	74.3027	77.6964	90.8302	73.8975	95.4651	132.347	139.041	166.968	0.13294	-0.00518703	0.140696	0.490843	0.437286	-0.0774727	0.826372	0.843341	1.10151	NM_028390	chr9:22142382-22138566	Anln	Mus musculus anillin, actin binding protein (Anln), mRNA [NM_028390]	GO:0000910|GO:0005634|GO:0007067|GO:0005856|GO:0005737|GO:0005826|GO:0003779|GO:0051301|GO:0015629|GO:0007049	NM_028390	Mm.282751	68743	ENSMUST00000040912	TC1617199
A_51_P367563	0.0171042	1.58039	down	524.8	857.103	2.821	3.48129	662.567	610.836	625.021	426.686	357.019	466.673	793.163	898.748	879.398	3.09888	3.03411	3.14868	2.72277	2.70969	2.21189	3.40966	3.53575	3.49846	NM_025789	chr17:8139154-8145458	Rsph3a	Mus musculus radial spoke 3A homolog (Chlamydomonas) (Rsph3a), mRNA [NM_025789]	GO:0008150|GO:0003674|GO:0005575	NM_025789	Mm.359991	66832	ENSMUST00000024572	TC1773185
A_51_P481920	0.0073022	1.79566	down	2651.39	4950.69	5.16724	6.01175	2301.83	1957.26	2393.45	3256.33	2618.76	3380.7	4662.32	5258.1	4931.63	4.89552	4.71409	5.0858	5.65477	5.5845	5.06873	5.96502	6.08431	5.98593	NM_009828	chr3:36464037-36463978	Ccna2	Mus musculus cyclin A2 (Ccna2), mRNA [NM_009828]	GO:0005634|GO:0005515|GO:0007067|GO:0045941|GO:0005737|GO:0048146|GO:0051301|GO:0007049|GO:0001939|GO:0001940	NM_009828	Mm.4189	12428	ENSMUST00000029270	TC1572126
A_51_P344566	0.0863852	1.69567	down	911.796	1543.06	3.56571	4.32757	634.193	536.046	668.655	1315.74	1056.96	1259.18	1398.82	1548.22	1682.12	3.03574	2.84568	3.24604	4.3474	4.27554	3.64389	4.22818	4.32038	4.43415	NM_011121	chr7:129313220-129313279	Plk1	Mus musculus polo-like kinase 1 (Drosophila) (Plk1), mRNA [NM_011121]	GO:0004672|GO:0005515|GO:0007067|GO:0005524|GO:0016740|GO:0051301|GO:0000166|GO:0000236|GO:0007049|GO:0005634|GO:0004674|GO:0000922|GO:0016301|GO:0006468|GO:0051233|GO:0005737|GO:0040038|GO:0000776|GO:0042801	NM_011121	Mm.16525	18817	ENSMUST00000033154	TC1572403
A_52_P357611	0.0903566	1.56573	up	157.892	104.548	1.06868	0.42184	133.801	103.364	117.338	217.815	168.291	206.743	77.9553	120.587	115.102	0.790902	0.471063	0.73544	1.7527	1.62465	1.03732	0.0627608	0.637909	0.56485	NM_016720	chr7:106960012-106959953	Neu3	Mus musculus neuraminidase 3 (Neu3), mRNA [NM_016720]	GO:0016787|GO:0016020|GO:0016798|GO:0008152|GO:0005886|GO:0005975|GO:0004308|GO:0016997	NM_016720	Mm.103703	50877	ENSMUST00000036331	TC1586763
A_52_P96782	0.00984263	1.68476	up	427.359	262.982	2.53018	1.77763	536.026	506.491	491.384	344.337	314.185	371.73	262.799	276.593	249.554	2.79312	2.76386	2.80163	2.41342	2.5253	1.88374	1.816	1.8356	1.68129	NM_028459	chr6:24584587-24583890	Wasl	Mus musculus Wiskott-Aldrich syndrome-like (human) (Wasl), transcript variant 1, mRNA [NM_028459]	GO:0005515|GO:0006350|GO:0008154|GO:0015629|GO:0006461|GO:0045449|GO:0030027|GO:0005083|GO:0005634|GO:0000139|GO:0005737|GO:0005856|GO:0003779|GO:0045010|GO:0030031|GO:0009617	NM_028459	Mm.1574	73178	ENSMUST00000041737	TC1731506
A_52_P301085	0.0178828	1.56758	down	189.11	306.587	1.34853	1.99707	254.871	199.967	215.992	170.904	123.705	169.222	279.053	326.208	314.498	1.72058	1.42309	1.61575	1.40278	1.18059	0.748398	1.90258	2.07363	2.01499	NM_178788	chr8:49226475-49226534	Dctd	Mus musculus dCMP deaminase (Dctd), transcript variant 1, mRNA [NM_178788]	GO:0009165|GO:0016787|GO:0046872|GO:0008150|GO:0004132|GO:0003674|GO:0016810|GO:0008270|GO:0005575|GO:0003824	NM_178788	Mm.121549	320685	ENSMUST00000033966	TC1577659
A_52_P523459	0.007386	1.98506	down	1226.61	2504.12	4.03828	5.02746	1030.83	918.079	898.182	1558.02	1284.78	1669.77	2310.85	2516.91	2684.61	3.73654	3.62194	3.67178	4.59124	4.55714	4.05106	4.9524	5.02142	5.10858	NM_009851	chr2:102651726-102651667	Cd44	Mus musculus CD44 antigen (Cd44), transcript variant 1, mRNA [NM_009851]	GO:0050731|GO:0005886|GO:0043066|GO:0005488|GO:0051219|GO:0001558|GO:0005634|GO:0007155|GO:0016020|GO:0001658|GO:0033031|GO:0031175|GO:0016021|GO:0070374|GO:0016323|GO:0010628|GO:0005515|GO:0004872|GO:0016477|GO:0060442|GO:0043518|GO:0016324|GO:0034238|GO:0009986|GO:0043234|GO:0005057|GO:0033138|GO:0005540|GO:0009897|GO:0002246	NM_009851	Mm.423621	12505	ENSMUST00000005218
A_52_P668285	0.0010358	1.74048	down	97.2353	178.563	0.418297	1.21778	109.284	94.1667	99.0119	102.421	79.9578	98.5712	163.824	187.997	183.869	0.498893	0.336615	0.490448	0.664107	0.550998	-0.0312796	1.13419	1.27854	1.24062	NM_011495	chr3:40615898-40616037	Plk4	Mus musculus polo-like kinase 4 (Drosophila) (Plk4), mRNA [NM_011495]	GO:0004672|GO:0004713|GO:0005515|GO:0005524|GO:0016740|GO:0000166|GO:0005730|GO:0005634|GO:0004674|GO:0060707|GO:0006468|GO:0016301|GO:0005737|GO:0005856	NM_011495	Mm.3794	20873	ENSMUST00000026858	NP854312
A_51_P171510	0.0086853	1.53662	up	1799.95	1216.96	4.60453	3.98477	2267.99	2090.5	1969.72	1446.46	1245.24	1779.82	1089.38	1310.41	1251.09	4.87416	4.8091	4.80469	4.48405	4.51204	4.14314	3.86747	4.07978	4.00705	NM_001011811	chr7:115355873-115355814	Olfr487	Mus musculus olfactory receptor 487 (Olfr487), mRNA [NM_001011811]	GO:0004872|GO:0004984|GO:0007608|GO:0007186|GO:0016021	NM_001011811	Mm.377337	258042	ENSMUST00000081996	TC1600659
A_51_P514085	0.0299524	1.54449	down	981.273	1559.39	3.71844	4.34557	746.206	868.439	734.433	1160.68	957.418	1420.46	1602.11	1608.28	1467.78	3.27039	3.54175	3.38141	4.16649	4.13284	3.81777	4.42394	4.37528	4.2375	NM_013606	chr16:97782327-97782386	Mx2	Mus musculus myxovirus (influenza virus) resistance 2 (Mx2), mRNA [NM_013606]	GO:0005525|GO:0005737|GO:0000166|GO:0045087|GO:0003924|GO:0009615	NM_013606	Mm.14157	17858	ENSMUST00000024112	TC1584229
A_51_P317427	0.00130363	1.63148	down	724.611	1249.37	3.31736	4.02354	779.611	689.744	715.187	769.771	614.753	778.603	1131.53	1335.55	1281.03	3.33357	3.20939	3.34309	3.57403	3.49369	2.95037	3.92225	4.1072	4.04117	NM_177420	chr19:15980029-15979970	Psat1	Mus musculus phosphoserine aminotransferase 1 (Psat1), mRNA [NM_177420]	GO:0006564|GO:0008652|GO:0008152|GO:0016740|GO:0004648|GO:0008483|GO:0003824|GO:0030170	NM_177420	Mm.289936	107272	ENSMUST00000025542	TC1573903
A_52_P33287	0.00911403	1.52225	down	430.136	699.466	2.56693	3.17313	449.123	411.475	446.001	447.938	376.13	450.147	553.688	770.104	774.605	2.53792	2.46413	2.66182	2.7929	2.78492	2.15988	2.89111	3.31289	3.3154	NM_011561	chr10:82112311-82112370	Tdg	Mus musculus thymine DNA glycosylase (Tdg), transcript variant 1, mRNA [NM_011561]	GO:0032183|GO:0016605|GO:0006974|GO:0030983|GO:0005634|GO:0016787|GO:0016798|GO:0008152|GO:0006298|GO:0006281|GO:0016799	NM_011561	Mm.347607	21665	ENSMUST00000092266	TC1572236
A_52_P463637	0.00504572	2.21803	down	111.261	272.332	0.607295	1.75657	132.037	115.914	117.933	114.886	89.1561	97.6387	162.543	311.132	343.321	0.771752	0.636381	0.742738	0.829796	0.708093	-0.0449934	1.12286	2.00536	2.1415	AY895789	chr12:114666800-114666741		Mus musculus clone RLS1478F immunoglobulin heavy chain (Igh) mRNA, partial cds. [AY895789]						NP614402
A_52_P200458	0.0278419	1.54757	up	2595.75	1733.77	5.12948	4.49948	3494.66	2875.73	2934.69	2282.6	1829.58	2157.22	1703.71	1713.82	1783.77	5.49789	5.26918	5.37991	5.1422	5.06713	4.42059	4.51265	4.46698	4.5188	NM_010242	chr9:14553283-14553224	Fut4	Mus musculus fucosyltransferase 4 (Fut4), mRNA [NM_010242]	GO:0016757|GO:0016020|GO:0008417|GO:0046920|GO:0006486|GO:0016740|GO:0009986|GO:0016021|GO:0005794	NM_010242	Mm.63450	14345		TC1585571
A_52_P8100	0.0174356	1.58103	down	62.1961	103.11	-0.23673	0.424139	71.6381	67.7052	72.0314	61.3288	47.891	52.5818	92.9848	111.201	105.143	-0.110388	-0.139336	0.0314736	-0.0757651	-0.188485	-0.937881	0.317109	0.521008	0.434299	NM_023564	chr11:69661074-69661319	Plscr3	Mus musculus phospholipid scramblase 3 (Plscr3), transcript variant 1, mRNA [NM_023564]	GO:0042593|GO:0016020|GO:0042632|GO:0017124|GO:0016021	NM_023564	Mm.28874	70310	ENSMUST00000152566	TC1698320
A_51_P422257	0.0188223	1.50983	up	58.6051	41.2819	-0.315151	-0.909534	66.6939	55.4488	60.5113	65.2591	47.0819	56.6359	34.6059	39.2522	49.9877	-0.213561	-0.427446	-0.219947	0.0138483	-0.213068	-0.83073	-1.10887	-0.981318	-0.638414	NM_010131	chr6:85144192-85153937	Emx1	Mus musculus empty spiracles homolog 1 (Drosophila) (Emx1), mRNA [NM_010131]	GO:0003700|GO:0021796|GO:0007275|GO:0030182|GO:0007420|GO:0006355|GO:0045449|GO:0030528|GO:0042493|GO:0005634|GO:0009791|GO:0043565|GO:0003677|GO:0021987	NM_010131	Mm.391473	13796	ENSMUST00000045942	TC1588999
A_52_P120037	0.0396629	1.60282	down	9478.2	14518.5	6.88488	7.56549	6392.5	10809.1	8807.4	5924.17	5663.18	19272.8	14822.3	14240.3	14492.7	6.36912	7.17943	6.96542	6.51814	6.69723	7.5799	7.63367	7.52167	7.54113	NM_010128	chr6:135332885-135332944	Emp1	Mus musculus epithelial membrane protein 1 (Emp1), mRNA [NM_010128]	GO:0016020|GO:0005886|GO:0016021|GO:0016049	NM_010128	Mm.182785	13730	ENSMUST00000111907	TC1682741
A_52_P279294	0.00377251	1.54178	down	55.5341	88.75	-0.414827	0.209771	46.1698	49.9513	48.23	57.0063	48.9303	82.9172	84.3948	86.5728	95.2825	-0.744164	-0.578081	-0.547223	-0.181208	-0.157513	-0.280774	0.177268	0.159822	0.292223	NM_029823	chrX:132529484-132529543	2900062L11Rik	Mus musculus RIKEN cDNA 2900062L11 gene (2900062L11Rik), mRNA [NM_029823]	GO:0008150|GO:0003674|GO:0005575	NM_029823	Mm.328305	76976	ENSMUST00000058119	TC1677001
A_51_P294161	0.000308015	1.86949	down	84.2103	166.188	0.211596	1.11424	86.6942	77.9826	75.6271	86.9785	79.5088	98.4709	152.568	174.18	171.817	0.164821	0.0645499	0.10175	0.428329	0.542875	-0.0327492	1.03149	1.16841	1.14281	NM_197997	chr3:127319307-127319366	4930422G04Rik	Mus musculus RIKEN cDNA 4930422G04 gene (4930422G04Rik), mRNA [NM_197997]	GO:0008150|GO:0003674|GO:0005575	NM_197997	Mm.274884	71643	ENSMUST00000043108	TC1616882
A_52_P180310	0.0248642	1.74186	up	85.8899	48.1789	0.128422	-0.672207	59.4315	64.4213	60.4316	89.6604	68.8123	172.583	50.271	44.1349	50.1309	-0.379888	-0.211065	-0.221849	0.472141	0.334427	0.776769	-0.57016	-0.812173	-0.634288	AK042645	chr11:96712375-96712434		Mus musculus 7 days neonate cerebellum cDNA, RIKEN full-length enriched library, clone:A730013F24 product:unclassifiable, full insert sequence. [AK042645]			Mm.22144			TC1633560
A_51_P470630	0.0302247	1.74469	up	80.7322	46.0368	0.0628469	-0.740126	112.658	99.966	102.768	53.0033	40.4938	75.5038	45.1473	51.1086	41.8545	0.542764	0.422836	0.544165	-0.286248	-0.43054	-0.415896	-0.725247	-0.600526	-0.894604	NM_029809	chr7:13516229-13516288	2310014L17Rik	Mus musculus RIKEN cDNA 2310014L17 gene (2310014L17Rik), mRNA [NM_029809]	GO:0046872|GO:0008150|GO:0003674|GO:0005575	NM_029809	Mm.439896	381845	ENSMUST00000045870	TC1584415
A_52_P551154	0.0102919	1.56809	down	958.708	1569.59	3.7049	4.3539	876.138	776.014	835.405	1156.13	880.803	1227.76	1446.1	1614.03	1648.64	3.50197	3.37941	3.56725	4.16083	4.01251	3.60744	4.27614	4.38043	4.40515		chr4:107088863-107088922	Tmem48	transmembrane protein 48 Gene [Source:MGI Symbol;Acc:MGI:1920037] [ENSMUST00000139560]	GO:0005643|GO:0005634|GO:0016020|GO:0008150|GO:0003674|GO:0015031|GO:0055085|GO:0016021|GO:0005575|GO:0051028|GO:0006810			72787	ENSMUST00000139560	TC1652077
A_51_P191649	0.00596678	1.715	down	66.4771	119.975	-0.139873	0.638339	66.2895	55.3825	55.0187	79.8488	63.4711	78.8519	103.149	122.977	133.8	-0.222334	-0.429173	-0.357231	0.304942	0.217859	-0.3533	0.466765	0.666229	0.782023	NM_023294	chr17:71861755-71860793	Ndc80	Mus musculus NDC80 homolog, kinetochore complex component (S. cerevisiae) (Ndc80), mRNA [NM_023294]	GO:0005634|GO:0005515|GO:0000775|GO:0007067|GO:0000089|GO:0051301|GO:0007049|GO:0000776	NM_023294	Mm.225956	67052	ENSMUST00000024851	TC1578485
A_52_P30641	0.0461899	2.21164	down	196.986	414.737	1.28016	2.42527	323.035	267.683	261.523	124.115	100.504	105.057	366.19	391.347	486.674	2.0625	1.84385	1.89171	0.941274	0.880939	0.060657	2.29463	2.33628	2.64489	DQ372749	chr6:68860899-68860655		Mus musculus clone BL6immB-20 immunoglobulin kappa light chain mRNA, partial cds. [DQ372749]					ENSMUST00000103337	TC1668130
A_51_P112405	0.00167148	1.52145	down	533.505	857.308	2.87647	3.48192	568.272	505.668	531.44	534.698	466.939	594.014	856.919	804.613	910.393	2.8774	2.76152	2.91468	3.04832	3.09692	2.55998	3.5212	3.37613	3.54843	NM_011113	chr7:25259315-25259374	Plaur	Mus musculus plasminogen activator, urokinase receptor (Plaur), mRNA [NM_011113]	GO:0005576|GO:0004872|GO:0016020|GO:0005886|GO:0016301|GO:0031225|GO:0030377	NM_011113	Mm.1359	18793	ENSMUST00000002284	TC1581513
A_52_P162099	0.0558535	1.8126	down	140.548	258.079	0.873896	1.73196	101.842	82.5432	105.995	200.146	155.532	197.23	200.574	281.549	292.114	0.397146	0.146548	0.588774	1.63065	1.5109	0.969362	1.42618	1.86122	1.90847	NM_001004140	chr8:23279443-23279384	Ckap2	Mus musculus cytoskeleton associated protein 2 (Ckap2), mRNA [NM_001004140]	GO:0008150|GO:0003674|GO:0005874|GO:0005856|GO:0005737|GO:0007049|GO:0006915|GO:0005575	NM_001004140	Mm.22448	80986	ENSMUST00000046916	TC1648084
A_52_P229981	0.0150055	6.2901	down	857.893	3711.36	2.94174	5.59482	167.517	2125.44	843.054	276.315	239.54	1495.5	3400.74	3756.76	3976.57	1.11512	4.83301	3.5804	2.09591	2.13396	3.89203	5.50982	5.59925	5.67539	NM_145932	chr16:32475930-32475871	Osta	Mus musculus organic solute transporter alpha (Osta), mRNA [NM_145932]	GO:0005215|GO:0016020|GO:0005886|GO:0016021|GO:0006810	NM_145932	Mm.476915	106407	ENSMUST00000042042	TC1582847
A_51_P407053	8.49115e-06	2.02013	down	146.766	306.113	0.982047	1.9965	151.53	127.349	130.78	139.861	109.855	221.22	307.654	288.326	322.357	0.970418	0.772114	0.891911	1.11359	1.00929	1.13497	2.04335	1.89554	2.0506	NM_009851	chr2:102674479-102674420	Cd44	Mus musculus CD44 antigen (Cd44), transcript variant 1, mRNA [NM_009851]	GO:0050731|GO:0005886|GO:0043066|GO:0005488|GO:0051219|GO:0001558|GO:0005634|GO:0007155|GO:0016020|GO:0001658|GO:0033031|GO:0031175|GO:0016021|GO:0070374|GO:0016323|GO:0010628|GO:0005515|GO:0004872|GO:0016477|GO:0060442|GO:0043518|GO:0016324|GO:0034238|GO:0009986|GO:0043234|GO:0005057|GO:0033138|GO:0005540|GO:0009897|GO:0002246	NM_009851	Mm.423621	12505	ENSMUST00000111189	TC1660204
A_51_P248819	0.00929762	1.92328	down	1316.29	2621.35	4.14885	5.09242	1134.21	979.358	1031.67	1720.02	1389.29	1643.16	2360.08	2726.14	2777.83	3.87443	3.71516	3.87169	4.73396	4.66996	4.02788	4.98281	5.13662	5.15783	NM_026505	chr18:3512455-3512514	Bambi	Mus musculus BMP and activin membrane-bound inhibitor, homolog (Xenopus laevis) (Bambi), mRNA [NM_026505]	GO:0007179|GO:0016020|GO:0016021	NM_026505	Mm.284863	68010	ENSMUST00000025075	TC1577865
A_51_P105709	0.0318072	1.50395	down	486.837	763.03	2.72582	3.31459	433.055	375.743	416.295	582.527	500.516	612.885	730.969	755.283	802.839	2.48536	2.33307	2.56238	3.17192	3.19711	2.6051	3.29185	3.28485	3.36705	NM_027182	chr13:74050175-74050116	Trip13	Mus musculus thyroid hormone receptor interactor 13 (Trip13), mRNA [NM_027182]	GO:0007131|GO:0004872|GO:0005515|GO:0001556|GO:0005524|GO:0007141|GO:0007286|GO:0042802|GO:0000166|GO:0001673|GO:0000239|GO:0007144|GO:0017111|GO:0006302	NM_027182	Mm.275095	69716	ENSMUST00000022053	TC1578427
A_51_P302856	0.0141074	1.91182	down	49.1046	99.0638	-0.628899	0.306047	52.4393	64.0344	55.8831	27.4472	33.3638	61.4598	62.6904	103.776	130.725	-0.560467	-0.219756	-0.33474	-1.23567	-0.709958	-0.712803	-0.251642	0.421306	0.748479	NM_053215	chr5:87669766-87669707	Ugt2b37	Mus musculus UDP glucuronosyltransferase 2 family, polypeptide B37 (Ugt2b37), mRNA [NM_053215]	GO:0016757|GO:0008150|GO:0003674|GO:0016740|GO:0005743	NM_053215	Mm.160362	112417	ENSMUST00000075858	TC1606243
A_51_P510914	0.0015536	1.66674	down	801.035	1406.69	3.46091	4.19795	735.642	825.22	705.886	828.112	773.524	937.823	1379.1	1438.77	1402.19	3.24982	3.4681	3.32421	3.67942	3.82513	3.2188	4.2077	4.2146	4.17155	AK013921	chr2:175872655-175872714		KRAB box and zinc finger, C2H2 type domain containing [Source:RefSeq peptide;Acc:NP_001092778] [ENSMUST00000109055]			Mm.441314		ENSMUST00000109055
A_52_P433847	0.0150211	1.58698	down	649.193	1091.6	3.16095	3.82724	704.895	650.555	590.535	625.001	700.854	623.316	966.729	1174.11	1133.94	3.18822	3.125	3.0668	3.27346	3.6828	2.62945	3.69515	3.92133	3.86522	NM_009514	chr10:75412265-75412324	Vpreb3	Mus musculus pre-B lymphocyte gene 3 (Vpreb3), mRNA [NM_009514]		NM_009514	Mm.333851	22364	ENSMUST00000121151	TC1705768
A_52_P159276	0.0211366	2.01187	down	105.795	212.931	0.46291	1.47145	71.1168	75.5979	70.1292	139.113	115.831	162.985	194.951	226.699	217.143	-0.120925	0.0197434	-0.00713778	1.10585	1.08571	0.694222	1.38516	1.54861	1.48058	NM_145890	chr12:25301994-25302053	Grhl1	Mus musculus grainyhead-like 1 (Drosophila) (Grhl1), transcript variant 2, mRNA [NM_145890]	GO:0005634|GO:0003700|GO:0006350|GO:0007275|GO:0003677|GO:0045449	NM_145890	Mm.263068	195733	ENSMUST00000085553	TC1578876
A_51_P432794	0.00665949	1.59525	down	215.574	364.089	1.56589	2.23967	217.159	189.073	210.717	250.897	190.859	234.737	315.034	365.741	411.491	1.48957	1.34227	1.58008	1.95669	1.8062	1.22053	2.07755	2.23866	2.4028	NM_146174	chr6:42573955-42573896	Fam115c	Mus musculus family with sequence similarity 115, member C (Fam115c), mRNA [NM_146174]	GO:0008150|GO:0003674|GO:0005575	NM_146174	Mm.279659	232748	ENSMUST00000031879	TC1642167
A_52_P517683	0.00615863	1.85664	up	21726.8	12376.7	8.21164	7.31895	18977.4	20572.2	16953.2	23092.1	23666.2	27099.7	14840.9	12013.4	10275.6	7.93895	8.10788	7.91019	8.48085	8.76038	8.07161	7.63548	7.27634	7.04502	NM_011526	chr9:45738975-45738916	Tagln	Mus musculus transgelin (Tagln), mRNA [NM_011526]	GO:0007517|GO:0007010|GO:0005737	NM_011526	Mm.283283	21345	ENSMUST00000034590	TC1715079
A_52_P467389	0.00730203	1.54557	down	157.922	258.25	1.12212	1.75027	172.932	155.02	148.239	165.705	147.453	158.185	243.058	252.763	278.929	1.16102	1.05578	1.0727	1.35821	1.43395	0.651091	1.70334	1.70562	1.84184	NM_023044	chr19:10931798-10932148	Slc15a3	Mus musculus solute carrier family 15, member 3 (Slc15a3), mRNA [NM_023044]	GO:0005764|GO:0015293|GO:0015833|GO:0005215|GO:0016020|GO:0008150|GO:0003674|GO:0015031|GO:0005765|GO:0016021|GO:0006857|GO:0006810	NM_023044	Mm.479645	65221	ENSMUST00000025646	TC1584165
A_52_P252931	0.0114482	1.51549	down	853.626	1389.99	3.55241	4.15219	913.071	765.982	835.289	893.048	743.723	970.642	1023.85	1511.92	1634.2	3.56154	3.36064	3.56705	3.78834	3.76845	3.26842	3.77798	4.28614	4.39245	NM_013505	chr18:20190396-20190337	Dsc2	Mus musculus desmocollin 2 (Dsc2), mRNA [NM_013505]	GO:0007156|GO:0005515|GO:0016020|GO:0007155|GO:0030054|GO:0005886|GO:0016021|GO:0005509	NM_013505	Mm.280547	13506	ENSMUST00000128464	TC1618705
A_51_P203182	0.0224569	2.0019	down	254.847	511.993	1.73814	2.73951	185.449	172.621	171.202	356.292	282.001	361.517	497.159	507.583	531.236	1.26183	1.21094	1.28047	2.46266	2.36939	1.84354	2.73575	2.71148	2.77129	NM_138310	chr7:133732372-133732431	Apob48r	Mus musculus apolipoprotein B48 receptor (Apob48r), mRNA [NM_138310]	GO:0034361|GO:0004872|GO:0005886|GO:0008203|GO:0006869|GO:0034362|GO:0006810|GO:0006629|GO:0016020|GO:0008202|GO:0030229|GO:0005575|GO:0042627|GO:0006641	NM_138310	Mm.170665	171504	ENSMUST00000039522	TC1582093
A_51_P431018	0.0294027	1.51081	down	51723.1	79120.2	9.41626	10.0116	60738.2	68131.9	61675	34081.5	30706.6	55005.4	76982.5	80156.2	80222	9.61727	9.83551	9.77332	9.04244	9.13609	9.09291	10.0104	10.0145	10.0098	NM_019414	chr3:94508262-94508321	Selenbp2	Mus musculus selenium binding protein 2 (Selenbp2), mRNA [NM_019414]	GO:0008430|GO:0005634|GO:0016020|GO:0015031|GO:0005737|GO:0006810	NM_019414	Mm.225405	20342	ENSMUST00000090848	TC1572558
A_52_P625118	0.000585665	3.02966	down	238.031	731.761	1.64105	3.2402	173.644	184.729	171.409	258.552	225.903	413.953	595.497	753.249	846.537	1.16694	1.30874	1.28222	2.00005	2.04939	2.03895	2.99614	3.28096	3.44351	NM_007592	chr4:8072763-8072704	Car8	Mus musculus carbonic anhydrase 8 (Car8), mRNA [NM_007592]	GO:0005515|GO:0006730|GO:0046872|GO:0004089|GO:0005737|GO:0048015|GO:0008270	NM_007592	Mm.119320	12319	ENSMUST00000066674	TC1596317
A_51_P239177	5.02966e-07	4.93418	down	49.0111	249.159	-0.60658	1.69623	47.6007	41.8204	58.7292	37.8507	36.69	71.3755	221.566	258.012	267.9	-0.700132	-0.834394	-0.263075	-0.77201	-0.572853	-0.497017	1.56978	1.73528	1.78364	NM_175391	chr15:77355402-77355343	Apol7c	Mus musculus apolipoprotein L 7c (Apol7c), mRNA [NM_175391]	GO:0008150|GO:0003674|GO:0005575	NM_175391	Mm.86391	108956	ENSMUST00000062562	TC1580479
A_52_P530082	0.000492778	1.74578	down	83.2644	152.7	0.189319	0.993194	94.9475	94.9864	79.4031	69.0542	71.7607	89.4343	162.013	150.448	145.638	0.296014	0.349119	0.172043	0.0953989	0.394954	-0.171618	1.11815	0.957103	0.904331	NM_001002896	chr9:103335047-103329107	Bfsp2	Mus musculus beaded filament structural protein 2, phakinin (Bfsp2), mRNA [NM_001002896]	GO:0005882|GO:0016020|GO:0007010|GO:0005856|GO:0005737|GO:0007601|GO:0005198|GO:0050896|GO:0005212	NM_001002896	Mm.335403	107993	ENSMUST00000035165	TC1581862
A_51_P327011	0.0534684	1.7964	up	70.948	37.7281	-0.178016	-1.02313	51.5195	49.6608	39.7246	56.7624	81.4697	146.551	39.3124	37.5864	36.2854	-0.585996	-0.586494	-0.827121	-0.187394	0.578024	0.540884	-0.9249	-1.04388	-1.1006	NM_001009978	chr2:79715185-79708435	Pde1a	Mus musculus phosphodiesterase 1A, calmodulin-dependent (Pde1a), transcript variant 7, mRNA [NM_001009978]	GO:0046069|GO:0004117|GO:0005516|GO:0043025|GO:0004114|GO:0003824|GO:0007165|GO:0004115|GO:0030553|GO:0005634|GO:0016787|GO:0046872|GO:0005737|GO:0034391|GO:0048660|GO:0048101|GO:0006198	NM_001009978	Mm.40678	18573	ENSMUST00000134739	NP1398801
A_51_P499698	2.81731e-05	4.3787	down	192.778	876.034	1.38288	3.51339	173.156	159.864	144.115	237.998	190.972	250.56	836.311	859.672	932.12	1.16289	1.10017	1.03199	1.88055	1.80705	1.31464	3.48608	3.47162	3.58246	NM_026414	chr6:86579351-86579410	Asprv1	Mus musculus aspartic peptidase, retroviral-like 1 (Asprv1), mRNA [NM_026414]	GO:0006508|GO:0016787|GO:0016020|GO:0051605|GO:0043588|GO:0004190|GO:0008233|GO:0016021	NM_026414	Mm.183043	67855	ENSMUST00000043400	TC1580639
A_51_P127718	0.0040003	1.59365	up	289.363	191.175	1.98833	1.31599	276.962	270.366	245.136	297.755	288.123	357.837	208.325	183.721	181.481	1.8405	1.85824	1.79836	2.20372	2.40037	1.82878	1.48088	1.24535	1.22176	NM_015825	chr16:96428272-96435676	Sh3bgr	Mus musculus SH3-binding domain glutamic acid-rich protein (Sh3bgr), mRNA [NM_015825]	GO:0008150|GO:0003674|GO:0017124|GO:0005575	NM_015825	Mm.28638	50795	ENSMUST00000129904	TC1582995
A_52_P485939	0.00352935	2.08092	down	746.326	1639.66	3.33902	4.39625	766.74	562.014	585.749	906.205	735.208	922.037	1247.29	1799.9	1871.79	3.30955	2.91393	3.05506	3.80944	3.75184	3.19431	4.06277	4.53768	4.58828	NM_026228	chr3:135551169-135551228	Slc39a8	Mus musculus solute carrier family 39 (metal ion transporter), member 8 (Slc39a8), transcript variant 3, mRNA [NM_026228]	GO:0030001|GO:0016020|GO:0055085|GO:0006811|GO:0046873|GO:0016021|GO:0006829|GO:0006810	NM_026228	Mm.30239	67547	ENSMUST00000081978	TC1576424
A_52_P102248	0.0572396	1.78281	down	167.927	300.541	1.13034	1.96449	123.202	104.912	115.601	244.153	188.163	231.533	260.057	325.883	315.684	0.671833	0.492505	0.713933	1.91738	1.78567	1.2007	1.80087	2.07219	2.02042	NM_175366	chr7:90019806-90019865	Mex3b	Mus musculus mex3 homolog B (C. elegans) (Mex3b), mRNA [NM_175366]	GO:0005634|GO:0005515|GO:0046872|GO:0005737|GO:0008270|GO:0003723	NM_175366	Mm.306789	108797		TC1581695
A_51_P203148	0.0457993	2.09484	down	1605.02	3193.12	4.31132	5.37816	2588.72	2177.15	2143.07	959.422	767.869	993.887	3012.27	3100.89	3466.2	5.06498	4.8677	4.92638	3.89176	3.81455	3.30256	5.33482	5.32244	5.47722	AB017433	chr12:117107033-117106984		Mus musculus mRNA for anti-IL-18 IgG heavy chain, clone 125-2H, partial cds. [AB017433]			Mm.474964			NP165221
A_52_P73475	3.83556e-05	1.64329	down	400.54	688.996	2.45022	3.16681	379.026	441.608	395.207	367.101	311.209	509.087	735.03	659.159	672.798	2.29311	2.56609	2.48738	2.50578	2.51157	2.33739	3.29985	3.08846	3.11211	NM_175511	chr2:31922570-31922511	Fam78a	Mus musculus family with sequence similarity 78, member A (Fam78a), mRNA [NM_175511]	GO:0008150|GO:0003674|GO:0005575	NM_175511	Mm.250441	241303	ENSMUST00000056406	TC1578658
A_51_P194498	0.0405778	1.53665	up	1728.61	1175.42	4.55285	3.93306	1521.88	1432.68	1331.27	2051.49	1900.4	2133.93	1328.3	1115.83	1082.13	4.2986	4.26397	4.23951	4.9882	5.12192	4.40492	4.15355	3.84788	3.79774	NM_023395	chr8:122211586-122211645	Wfdc1	Mus musculus WAP four-disulfide core domain 1 (Wfdc1), mRNA [NM_023395]	GO:0005576|GO:0003674|GO:0050680|GO:0005615|GO:0004867|GO:0030414|GO:0001558	NM_023395	Mm.87599	67866	ENSMUST00000024107	TC1599234
A_52_P62444	0.00258352	1.54573	up	379.614	258.43	2.37689	1.74861	362.592	371.047	318.861	387.194	349.589	488.403	273.867	228.352	273.07	2.22916	2.31493	2.1777	2.58266	2.67935	2.27756	1.87552	1.5591	1.81121	NM_013681	chr6:115226390-115226449	Syn2	Mus musculus synapsin II (Syn2), transcript variant IIb, mRNA [NM_013681]	GO:0030672|GO:0030054|GO:0005524|GO:0045202|GO:0007269|GO:0046983|GO:0008021|GO:0003824	NM_013681	Mm.441431	20965		TC1578866
A_52_P558259	0.000680884	1.75397	up	381.914	228.404	2.38323	1.5726	371.454	398.841	310.989	342.267	373.313	494.617	246.63	227.551	211.032	2.264	2.41914	2.14164	2.40472	2.77407	2.29579	1.72439	1.55402	1.4394	NM_207650	chr18:23817652-23817711	Dtna	Mus musculus dystrobrevin alpha (Dtna), transcript variant 1, mRNA [NM_207650]	GO:0005792|GO:0005515|GO:0046872|GO:0042383|GO:0030054|GO:0045202|GO:0005737|GO:0008270|GO:0016014|GO:0005509	NM_207650	Mm.94371	13527	ENSMUST00000115834	TC1580290
A_52_P231075	0.00173963	1.62871	down	87.6373	150.462	0.265878	0.96961	82.3847	84.7636	76.3439	94.165	81.4487	106.718	139.399	146.643	165.345	0.0912614	0.184844	0.11536	0.54286	0.577652	0.0832882	0.901267	0.920143	1.08742	NM_030707	chr3:87056481-87056422	Fcrls	Mus musculus Fc receptor-like S, scavenger receptor (Fcrls), mRNA [NM_030707]	GO:0004872	NM_030707	Mm.45173	80891	ENSMUST00000090986	TC1580757
A_52_P624302	0.0211026	1.68749	up	46.3658	27.428	-0.727606	-1.48248	75.956	45.6144	28.6883	32.9129	36.7429	58.2805	27.6365	27.7636	26.8841	-0.0259509	-0.709113	-1.29669	-0.973678	-0.570773	-0.789433	-1.43331	-1.4809	-1.53323	NM_009308	chr18:31599272-31599213	Syt4	Mus musculus synaptotagmin IV (Syt4), mRNA [NM_009308]	GO:0005215|GO:0007269|GO:0048489|GO:0006810|GO:0005509|GO:0031410|GO:0016020|GO:0043005|GO:0046872|GO:0030054|GO:0048471|GO:0045202|GO:0008021|GO:0016021|GO:0017158	NM_009308	Mm.479655	20983	ENSMUST00000025110	TC1572171
A_52_P182919	0.00362885	1.89437	down	74.921	148.171	0.0258005	0.947517	65.1928	62.8691	64.268	97.6327	69.1292	90.4339	133.763	152.592	158.16	-0.246402	-0.246251	-0.133051	0.595034	0.341056	-0.155582	0.841717	0.977513	1.02332	NM_054098	chr5:7978532-7980313	Steap4	Mus musculus STEAP family member 4 (Steap4), mRNA [NM_054098]	GO:0005886|GO:0005488|GO:0016491|GO:0003824|GO:0006826|GO:0006810|GO:0005506|GO:0005887|GO:0009055|GO:0046872|GO:0045444|GO:0016020|GO:0008152|GO:0006811|GO:0016021|GO:0055114|GO:0050660|GO:0005794	NM_054098	Mm.31403	117167	ENSMUST00000115421	NP366308
A_52_P156452	0.0220167	1.72882	down	225.2	396.147	1.57784	2.36762	321.374	269.608	263.4	167.925	145.109	183.784	428.048	375.554	384.84	2.05507	1.85419	1.90203	1.37742	1.41083	0.867491	2.51981	2.27686	2.3062	NM_007717	chr13:24562356-24562415	Cmah	Mus musculus cytidine monophospho-N-acetylneuraminic acid hydroxylase (Cmah), transcript variant 1, mRNA [NM_007717]	GO:0046872|GO:0051536|GO:0005737|GO:0046381|GO:0016491|GO:0051537|GO:0022900|GO:0030338|GO:0006810|GO:0005783|GO:0055114	NM_007717	Mm.8396	12763	ENSMUST00000110391	TC1583321
A_51_P151862	0.00731729	1.76895	up	4013.64	2401.4	5.76756	4.94466	3670.71	4114.16	2934.37	3792.97	4123.18	5446.46	3045.04	2168.65	1990.51	5.5688	5.78585	5.37976	5.87486	6.23937	5.75673	5.35043	4.80656	4.67701	NM_144862	chr18:32118215-32118273	Lims2	Mus musculus LIM and senescent cell antigen like domains 2 (Lims2), mRNA [NM_144862]	GO:0046872|GO:0016020|GO:0008150|GO:0003674|GO:0030054|GO:0005886|GO:0008270|GO:0005925	NM_144862	Mm.24551	225341		TC1580913
A_51_P320434	0.0788692	2.01579	up	57.8278	26.7318	-0.516189	-1.52753	98.8326	75.024	82.0161	30.1882	27.608	33.298	29.0896	28.2449	22.8608	0.353871	0.00875044	0.218754	-1.09835	-0.983156	-1.59701	-1.35938	-1.4561	-1.76711	NM_001002764	chr11:74742731-74742790	Smg6	Mus musculus Smg-6 homolog, nonsense mediated mRNA decay factor (C. elegans) (Smg6), mRNA [NM_001002764]	GO:0004519|GO:0005634|GO:0016787|GO:0000184|GO:0046872|GO:0008150|GO:0003674|GO:0003677|GO:0004518|GO:0000781|GO:0005694|GO:0005575	NM_001002764	Mm.288460	103677	ENSMUST00000045281	TC1729078
A_52_P257502	0.0363588	1.65106	down	749.613	1282.91	3.33127	4.05467	634.492	607.511	514.034	939.986	827.589	974.067	1082.63	1311.55	1454.55	3.03642	3.02624	2.86664	3.86224	3.9226	3.2735	3.85852	4.08104	4.22444	NM_010517	chr11:98913334-98913393	Igfbp4	Mus musculus insulin-like growth factor binding protein 4 (Igfbp4), mRNA [NM_010517]	GO:0005576|GO:0005520|GO:0005615|GO:0019838|GO:0001558	NM_010517	Mm.233799	16010	ENSMUST00000017637	TC1779683
A_51_P247542	0.00439646	1.62849	up	1825.71	1178.98	4.64688	3.94334	1854.21	1502.83	1833.53	2066.77	1659.6	2037.34	1181.8	1163.17	1191.99	4.58355	4.33294	4.70133	4.9989	4.92645	4.3381	3.98495	3.90783	3.93723	NM_172799	chr11:96026679-96026738	Ttll6	Mus musculus tubulin tyrosine ligase-like family, member 6 (Ttll6), mRNA [NM_172799]	GO:0005929|GO:0006464|GO:0008150|GO:0004835|GO:0003674|GO:0042995|GO:0005856|GO:0005737|GO:0005575|GO:0016874	NM_172799	Mm.249912	237930	ENSMUST00000035282	TC1660225
A_51_P307917	0.0807219	1.52733	up	166.12	113.77	1.14696	0.535945	129.697	203.25	102.504	157.586	174.561	229.122	149.983	97.973	93.3526	0.745958	1.44658	0.540455	1.28574	1.67742	1.1856	1.00684	0.338291	0.262702	NM_178915	chr12:113738646-113738587	Tmem179	Mus musculus transmembrane protein 179 (Tmem179), mRNA [NM_178915]	GO:0016020|GO:0008150|GO:0003674|GO:0016021|GO:0005575	NM_178915	Mm.37751	104885	ENSMUST00000066791	NP726889
A_51_P411926	0.00398104	1.90448	down	52.1038	100.578	-0.537273	0.392127	69.9421	48.4225	65.1005	30.3755	37.9432	60.8389	99.1681	100.214	102.351	-0.144955	-0.622925	-0.114485	-1.08942	-0.524399	-0.727452	0.40999	0.370926	0.395465	NM_007559	chr4:122802506-122802565	Bmp8b	Mus musculus bone morphogenetic protein 8b (Bmp8b), mRNA [NM_007559]	GO:0007179|GO:0005576|GO:0051216|GO:0040007|GO:0005125|GO:0001503|GO:0007275|GO:0005615|GO:0030154|GO:0008083|GO:0007283	NM_007559	Mm.439764	12164	ENSMUST00000002457	TC1587920
A_52_P507214	0.000339745	7.27216	down	62.6521	435.631	-0.356517	2.50587	40.989	35.2268	34.3293	94.3786	68.1425	102.847	415.954	432.123	458.816	-0.915877	-1.08193	-1.03771	0.54613	0.320314	0.0299764	2.47847	2.47928	2.55986	NM_013599	chr2:164780620-164780679	Mmp9	Mus musculus matrix metallopeptidase 9 (Mmp9), mRNA [NM_013599]	GO:0005515|GO:0005576|GO:0005615|GO:0004222|GO:0008233|GO:0005578|GO:0031915|GO:0043065|GO:0042493|GO:0001501|GO:0006508|GO:0006979|GO:0016787|GO:0046872|GO:0008152|GO:0048771|GO:0030198|GO:0031012|GO:0008270|GO:0030574|GO:0008237|GO:0001968	NM_013599	Mm.4406	17395	ENSMUST00000017881	TC1576282
A_51_P309917	0.000428694	1.86993	up	201.438	114.242	1.47032	0.567334	213.391	212.387	180.438	197.98	179.34	225.091	132.355	104.317	106.054	1.46431	1.51002	1.35628	1.61495	1.71638	1.15999	0.826457	0.428808	0.446738	NM_001001309	chr2:12028693-12028634	Itga8	Mus musculus integrin alpha 8 (Itga8), mRNA [NM_001001309]	GO:0007399|GO:0008305|GO:0042472|GO:0004872|GO:0005515|GO:0007229|GO:0007275|GO:0007613|GO:0030030|GO:0030154|GO:0030511|GO:0001656|GO:0007155|GO:0016020|GO:0030198|GO:0016021|GO:0045177	NM_001001309	Mm.329997	241226	ENSMUST00000028106	TC1665622
A_52_P407007	1.06863e-05	3.26892	up	436.326	141.577	2.57836	0.869548	456.333	374.45	430.521	468.463	360.438	527.75	133.404	170.981	120.346	2.5609	2.3281	2.61086	2.85753	2.72344	2.38934	0.837846	1.14167	0.629122	NR_027985	chr3:19795677-19795736	4632415L05Rik	Mus musculus RIKEN cDNA 4632415L05 gene (4632415L05Rik), non-coding RNA [NR_027985]	GO:0008150|GO:0003674|GO:0005575	NR_027985	Mm.478897	70808	ENSMUST00000059704	TC1585030
A_51_P482503	0.00146146	1.62083	down	270.192	456.744	1.87855	2.57528	264.499	257.437	208.767	273.112	250.942	366.397	461.706	454.924	453.602	1.77408	1.78755	1.56667	2.07909	2.20104	1.86289	2.62902	2.55346	2.54337	NM_009413	chr10:31052403-31052344	Tpd52l1	Mus musculus tumor protein D52-like 1 (Tpd52l1), mRNA [NM_009413]	GO:0005769|GO:0005515	NM_009413	Mm.439966	21987	ENSMUST00000000305	NP1313061
A_51_P234944	0.000293194	2.73613	down	41.764	117.509	-0.842151	0.609984	40.4053	33.0164	28.7662	49.2646	37.0941	62.0375	105.929	113.418	133.18	-0.936571	-1.17542	-1.29278	-0.391778	-0.557049	-0.699307	0.505146	0.549482	0.775323	NM_172845	chr1:173189671-173189730	Adamts4	Mus musculus a disintegrin-like and metallopeptidase (reprolysin type) with thrombospondin type 1 motif, 4 (Adamts4), mRNA [NM_172845]	GO:0006508|GO:0005576|GO:0016787|GO:0046872|GO:0004222|GO:0031012|GO:0008270|GO:0008233|GO:0008237|GO:0005578	NM_172845	Mm.475917	240913	ENSMUST00000006570	TC1578134
A_52_P544596	0.0470436	1.60353	down	536.316	850.525	2.79003	3.47128	652.585	739.992	669.302	316.264	272.789	566.967	807.11	862.984	881.48	3.07698	3.31084	3.24743	2.29073	2.32148	2.49275	3.43481	3.47717	3.50187	NM_133732	chr9:15088964-15088905	4931406C07Rik	Mus musculus RIKEN cDNA 4931406C07 gene (4931406C07Rik), mRNA [NM_133732]	GO:0005634|GO:0016787|GO:0046872|GO:0008150|GO:0003674|GO:0008270|GO:0005575|GO:0016788	NM_133732	Mm.261842	70984	ENSMUST00000034414	TC1600017
A_52_P39546	0.0141582	1.82369	down	623.283	1177.99	3.06362	3.93048	573.7	454.845	446.697	766.898	654.572	842.985	972.879	1277.92	1283.17	2.89111	2.6087	2.66407	3.56863	3.58424	3.06499	3.7043	4.04356	4.04358	NM_011565	chr7:52488814-52488873	Tead2	Mus musculus TEA domain family member 2 (Tead2), mRNA [NM_011565]	GO:0005667|GO:0005634|GO:0016563|GO:0003700|GO:0006350|GO:0003677|GO:0045944|GO:0006355|GO:0045449	NM_011565	Mm.3019	21677	ENSMUST00000107801	TC1572516
A_51_P417891	3.4645e-06	3.57995	down	58.3171	220.869	-0.317675	1.52226	58.4683	54.047	62.1934	60.556	50.4138	64.2243	196.365	227.911	238.33	-0.403461	-0.464386	-0.180391	-0.0940604	-0.114422	-0.649327	1.39558	1.55631	1.6149	NM_011280	chr17:37014159-37014218	Trim10	Mus musculus tripartite motif-containing 10 (Trim10), mRNA [NM_011280]	GO:0005515|GO:0046872|GO:0030218|GO:0005737|GO:0008270|GO:0005622	NM_011280	Mm.299155	19824	ENSMUST00000060524	TC1583865
A_51_P447835	0.000803665	1.69626	down	297.087	530.867	2.02948	2.79184	289.807	296.721	257.557	312.022	276.667	349.745	529.785	515.138	547.678	1.90591	1.99243	1.86967	2.27125	2.34184	1.79578	2.82745	2.73279	2.81527	NM_013737	chr17:43744314-43748236	Pla2g7	Mus musculus phospholipase A2, group VII (platelet-activating factor acetylhydrolase, plasma) (Pla2g7), mRNA [NM_013737]	GO:0016042|GO:0005576|GO:0016787|GO:0006954|GO:0003847	NM_013737	Mm.9277	27226	ENSMUST00000024706	TC1575197
A_51_P517672	0.00288779	2.63169	up	268.322	105.328	1.82818	0.432195	193.559	196.561	201.902	344.519	273.664	399.725	93.0437	134.785	88.1558	1.32359	1.3983	1.51843	2.41418	2.3261	1.98849	0.318022	0.798493	0.180068	NM_178779	chr1:107176822-107176763	Rnf152	Mus musculus ring finger protein 152 (Rnf152), transcript variant 1, mRNA [NM_178779]	GO:0005515|GO:0046872|GO:0008150|GO:0003674|GO:0008270|GO:0005575	NM_178779	Mm.389162	320311	ENSMUST00000058688	TC1604598
A_51_P279154	0.0725919	1.57363	down	251.009	402.315	1.73797	2.39207	199.118	175.807	179.037	327.042	287.711	337.338	396.11	399.383	411.451	1.36444	1.23732	1.34504	2.33907	2.39831	1.74368	2.40794	2.36561	2.40266	NM_009052	chrX:132674135-132674194	Bex1	Mus musculus brain expressed gene 1 (Bex1), mRNA [NM_009052]	GO:0007399|GO:0005634|GO:0005515|GO:0007275|GO:0045665|GO:0030154|GO:0005737|GO:0048011|GO:0002052	NM_009052	Mm.422943	19716	ENSMUST00000058125	TC1681847
A_51_P246653	0.00601541	1.5617	down	616.768	1007.5	3.07338	3.7165	567.255	517.869	540.237	679.948	594.285	801.013	990.187	1026.22	1006.1	2.87481	2.79591	2.93837	3.39502	3.44484	2.99131	3.72974	3.72711	3.69264	NM_020008	chr6:129411798-129411739	Clec7a	Mus musculus C-type lectin domain family 7, member a (Clec7a), mRNA [NM_020008]	GO:0002752|GO:0004872|GO:0050766|GO:0005529|GO:0006954|GO:0006910|GO:0032760|GO:0005488|GO:0001872|GO:0006911|GO:0016020|GO:0016337|GO:0002238|GO:0030247|GO:0001878|GO:0009897|GO:0045087|GO:0016021|GO:0001846|GO:0001874|GO:0001879	NM_020008	Mm.239516	56644	ENSMUST00000112076	TC1587603
A_52_P239403	0.0421141	1.50915	down	201.441	312.205	1.42482	2.01856	283.253	225.841	237.496	152.668	129.983	179.405	273.492	309.859	353.264	1.8729	1.59864	1.75268	1.24	1.25201	0.832706	1.87354	1.99945	2.18269	NM_181517	chr7:117194867-117194926	Ipo7	Mus musculus importin 7 (Ipo7), mRNA [NM_181517]	GO:0008565|GO:0006886|GO:0005634|GO:0005515|GO:0015031|GO:0005737|GO:0005488|GO:0006606|GO:0042393|GO:0006810	NM_181517	Mm.476899	233726	ENSMUST00000084731	TC1662376
A_52_P613241	0.00744116	1.66433	down	81.0684	144.47	0.156599	0.891539	79.4463	75.7768	71.8452	91.2232	77.2963	90.8226	110.123	155.701	167.587	0.0388646	0.0231543	0.02774	0.497072	0.50216	-0.149395	0.561152	1.00662	1.10685	NM_010493	chr9:20832290-20832349	Icam1	Mus musculus intercellular adhesion molecule 1 (Icam1), mRNA [NM_010493]	GO:0005515|GO:0005615|GO:0009986|GO:0045429|GO:0051092|GO:0001772|GO:0002457|GO:0030155|GO:0007155|GO:0016020|GO:0016337|GO:0007159|GO:0005178|GO:0009897|GO:0016021|GO:0033627	NM_010493	Mm.435508	15894	ENSMUST00000086399	TC1571893
A_52_P134170	0.00158191	1.7513	down	35.8858	66.6046	-1.01584	-0.20741	34.6889	34.977	35.95	39.0988	32.5984	38.0018	60.1393	65.9106	73.7641	-1.15664	-1.0922	-0.971162	-0.725204	-0.74344	-1.40638	-0.311579	-0.233582	-0.0770698	NM_026483	chr7:71533905-71533846	Mphosph10	Mus musculus M-phase phosphoprotein 10 (U3 small nucleolar ribonucleoprotein) (Mphosph10), mRNA [NM_026483]	GO:0005634|GO:0008150|GO:0003674|GO:0030529|GO:0006364|GO:0005575|GO:0042254	NM_026483	Mm.26973	67973	ENSMUST00000032735	TC1595719
A_52_P261858	0.00161221	1.76924	up	67.0894	39.9417	-0.131594	-0.954726	59.6715	72.2939	56.5195	58.7602	63.6006	91.6907	48.2099	36.053	35.562	-0.374072	-0.0447273	-0.318403	-0.13749	0.2208	-0.13567	-0.630555	-1.10397	-1.12965	NM_177652	chr2:112476777-112476718	Ryr3	Mus musculus ryanodine receptor 3 (Ryr3), mRNA [NM_177652]	GO:0030314|GO:0004872|GO:0006811|GO:0005216|GO:0006874|GO:0016021|GO:0006810|GO:0033017|GO:0006941	NM_177652	Mm.436657	20192	ENSMUST00000091818	TC1617677
A_51_P199041	0.0019321	1.65945	up	125.421	79.3435	0.769924	0.0392218	147.134	151.549	111.931	102.204	98.7013	141.005	93.3863	73.5983	71.0458	0.927944	1.02311	0.66738	0.661047	0.854829	0.485231	0.323324	-0.0744195	-0.131239	NM_001012765	chr16:35299723-35302391	Adcy5	Mus musculus adenylate cyclase 5 (Adcy5), mRNA [NM_001012765]	GO:0007191|GO:0044424|GO:0042383|GO:0005886|GO:0045121|GO:0016849|GO:0005524|GO:0009190|GO:0008294|GO:0007626|GO:0005768|GO:0007189|GO:0000166|GO:0001973|GO:0006171|GO:0016829|GO:0046872|GO:0016020|GO:0005624|GO:0016021|GO:0050885|GO:0004016|GO:0007195	NM_001012765	Mm.41137	224129	ENSMUST00000023549	TC1574016
A_51_P180905	0.00294637	2.19065	down	52.6779	120.052	-0.484391	0.64697	44.5639	43.374	41.8845	66.6993	57.4222	62.1235	121.412	115.222	123.522	-0.795238	-0.781772	-0.750738	0.0453429	0.073369	-0.697307	0.701948	0.572252	0.666711	NM_011048	chr7:73192472-73192531	Pcsk6	Mus musculus proprotein convertase subtilisin/kexin type 6 (Pcsk6), mRNA [NM_011048]	GO:0016787|GO:0008236|GO:0007368|GO:0007354|GO:0008233	NM_011048	Mm.294007	18553	ENSMUST00000055576	TC1603517
A_51_P419027	0.0304501	1.52627	up	324.323	217.951	2.10881	1.4988	274.191	234.543	266.246	360.012	289.175	521.769	234.009	184.283	235.56	1.82599	1.65318	1.91754	2.47764	2.40563	2.37289	1.64861	1.24976	1.59804	AK076353	chr5:77531328-77531269	4732457N14	Mus musculus 10 days neonate skin cDNA, RIKEN full-length enriched library, clone:4732457N14 product:hypothetical protein, full insert sequence. [AK076353]				330108		TC1594141
A_52_P627816	0.000256821	2.53286	down	85.4065	227.848	0.230371	1.57114	91.7128	78.9971	71.4021	97.5633	84.6676	88.096	223.258	221.221	239.064	0.246008	0.0831981	0.0188141	0.594008	0.63357	-0.19337	1.58076	1.51332	1.61934	NM_019984	chr14:56319091-56319032	Tgm1	Mus musculus transglutaminase 1, K polypeptide (Tgm1), transcript variant 2, mRNA [NM_019984]	GO:0019538|GO:0046872|GO:0016020|GO:0009887|GO:0008415|GO:0016740|GO:0031424|GO:0003810|GO:0018149|GO:0005913	NM_019984	Mm.41964	21816	ENSMUST00000002389	NP745194
A_51_P159113	0.00368197	1.51411	down	117.279	187.985	0.688434	1.28691	119.369	106.544	113.114	126.67	102.352	135.627	161.796	196.309	205.851	0.626246	0.514778	0.682554	0.97067	0.907229	0.429125	1.11622	1.34096	1.40354	NM_021877	chr14:70972141-70972200	Hr	Mus musculus hairless (Hr), mRNA [NM_021877]	GO:0000118|GO:0005515|GO:0006350|GO:0042826|GO:0046966|GO:0016604|GO:0043433|GO:0045449|GO:0051291|GO:0005634|GO:0046872|GO:0042809|GO:0003677|GO:0016481|GO:0003714	NM_021877	Mm.7598	15460	ENSMUST00000022691	TC1581479
A_51_P450829	0.00245571	1.51306	up	16523.7	11532.2	7.82587	7.22839	18307.8	16240.4	17493.7	15905.2	13335.7	17859.6	12274.4	12126.3	10195.9	7.88713	7.76677	7.95547	7.94295	7.93284	7.47004	7.36155	7.28983	7.03379	NM_133987	chrX:70927598-70927657	Slc6a8	Mus musculus solute carrier family 6 (neurotransmitter transporter, creatine), member 8 (Slc6a8), transcript variant 1, mRNA [NM_133987]	GO:0005309|GO:0006810|GO:0005887|GO:0015293|GO:0015881|GO:0016020|GO:0006814|GO:0006811|GO:0006836|GO:0005308|GO:0016021|GO:0005328|GO:0015220	NM_133987	Mm.274553	102857	ENSMUST00000033752	TC1574547
A_52_P429826	0.000129638	2.80341	down	77.0559	228.086	0.0791341	1.56632	82.3368	72.4615	60.3012	85.6425	77.013	84.5805	197.091	238.768	248.4	0.0904217	-0.0413876	-0.224967	0.405996	0.496862	-0.252121	1.4009	1.62345	1.67461	AK040987	chr4:44537995-44537936		Mus musculus adult male aorta and vein cDNA, RIKEN full-length enriched library, clone:A530055P18 product:unclassifiable, full insert sequence. [AK040987]			Mm.138828			TC1604602
A_52_P157450	0.00598744	1.52881	down	745.43	1186.72	3.34023	3.95264	858.965	759.577	922.655	637.23	535.482	758.67	1199.82	1201.97	1158.38	3.47341	3.34852	3.71057	3.30141	3.29453	2.91295	4.00679	3.95516	3.89597	NM_021304	chr5:31256786-31256925	Abhd1	Mus musculus abhydrolase domain containing 1 (Abhd1), mRNA [NM_021304]	GO:0016787|GO:0016020|GO:0008150|GO:0003674|GO:0004091|GO:0016021|GO:0005575	NM_021304	Mm.389615	57742	ENSMUST00000006814	TC1581107
A_52_P239086	0.0106773	11.3864	down	297.083	2020.99	1.20864	4.71788	77.6722	543.745	748.891	37.248	59.1657	315.776	2145.67	1842.02	2075.29	0.00628328	2.86626	3.40953	-0.795166	0.116522	1.64838	4.8454	4.57105	4.73718	NM_177744	chr15:77320890-77320949	Apol10a	Mus musculus apolipoprotein L 10a (Apol10a), mRNA [NM_177744]	GO:0008150|GO:0003674|GO:0005575	NM_177744	Mm.390820	245282	ENSMUST00000060551	TC1592966
A_51_P496253	0.0172235	1.62636	up	688.473	437.038	3.2075	2.50585	905.791	782.008	803.616	592.013	434.263	613.148	456.869	471.059	383.186	3.54999	3.39051	3.51128	3.19523	2.99226	2.60572	2.61382	2.60374	2.29998	NM_010484	chr11:76845560-76845619	Slc6a4	Mus musculus solute carrier family 6 (neurotransmitter transporter, serotonin), member 4 (Slc6a4), mRNA [NM_010484]	GO:0006837|GO:0005335|GO:0045121|GO:0019811|GO:0042803|GO:0006810|GO:0015222|GO:0051610|GO:0005887|GO:0015293|GO:0016020|GO:0005624|GO:0006836|GO:0008504|GO:0015844|GO:0016021|GO:0005328	NM_010484	Mm.300318	15567	ENSMUST00000108402	TC1581807
A_52_P109740	0.00131263	1.54039	down	31.0032	49.9821	-1.24232	-0.619021	35.2235	32.3993	30.0958	32.3056	21.5556	34.4397	51.3046	52.6484	45.9934	-1.13458	-1.20264	-1.22759	-1.00055	-1.34018	-1.54837	-0.540797	-0.557704	-0.758562		chr1:193543586-193543645
A_52_P653367	0.0110489	1.64919	up	12676.5	7971.56	7.4183	6.69654	15148.3	14743.7	15518.2	10734.1	8573.97	11340.6	7327.56	8796.16	7790.96	7.61382	7.62728	7.7826	7.37566	7.29558	6.81484	6.6173	6.82664	6.64567		chr18:61354190-61354131	Slc26a2	solute carrier family 26 (sulfate transporter), member 2 Gene [Source:MGI Symbol;Acc:MGI:892977] [ENSMUST00000146409]	GO:0005215|GO:0016020|GO:0015116|GO:0001503|GO:0055085|GO:0008271|GO:0016021|GO:0008272|GO:0006810			13521	ENSMUST00000146409	TC1673420
A_52_P415155	0.0540772	2.6983	down	286.067	689.277	1.72728	3.15933	147.725	119.896	126.92	484.47	394.454	442.938	581.195	725.684	760.952	0.933724	0.685111	0.848692	2.906	2.85355	2.13659	2.96106	3.22718	3.28974	NM_009526	chr1:74831461-74831520	Wnt6	Mus musculus wingless-related MMTV integration site 6 (Wnt6), mRNA [NM_009526]	GO:0005576|GO:0005515|GO:0009887|GO:0007275|GO:0007223|GO:0007267|GO:0004871|GO:0016055|GO:0007165|GO:0005578|GO:0005102	NM_009526	Mm.268282	22420	ENSMUST00000006716	TC1588960
A_51_P255365	0.0218959	2.23423	down	147.362	324.314	0.92145	2.08123	96.4128	84.2567	105.297	207.419	170.867	219.918	327.295	318.96	326.686	0.318109	0.176189	0.579237	1.68215	1.64657	1.12645	2.13263	2.04121	2.06984	NM_007709	chrX:99442948-99442889	Cited1	Mus musculus Cbp/p300-interacting transactivator with Glu/Asp-rich carboxy-terminal domain 1 (Cited1), mRNA [NM_007709]	GO:0071104|GO:0032868|GO:0030318|GO:0051591|GO:0070555|GO:0060712|GO:0070670|GO:0045449|GO:0005634|GO:0005829|GO:0034341|GO:0043473|GO:0060711|GO:0071107|GO:0001658|GO:0002009|GO:0010628|GO:0034097|GO:0005515|GO:0042438|GO:0003700|GO:0001890|GO:0001570|GO:0071105|GO:0007420|GO:0001822|GO:0030528|GO:0016563|GO:0070741|GO:0005737|GO:0032496|GO:0045668|GO:0070669	NM_007709	Mm.2390	12705	ENSMUST00000101336	TC1591415
A_52_P421234	0.0433528	1.8037	down	1437.92	2611.01	4.23612	5.08708	1073.8	906.113	1021.04	1943.47	1639.02	2044.1	2374.22	2657.88	2800.92	3.79547	3.60302	3.85674	4.91016	4.90845	4.34288	4.99142	5.10004	5.16977	NM_133832	chr1:16121478-16121537	Rdh10	Mus musculus retinol dehydrogenase 10 (all-trans) (Rdh10), mRNA [NM_133832]	GO:0009887|GO:0043584|GO:0005488|GO:0043583|GO:0003824|GO:0035115|GO:0003674|GO:0016020|GO:0008152|GO:0004745|GO:0060431|GO:0016021|GO:0048703|GO:0005792|GO:0008150|GO:0008406|GO:0031076|GO:0001701|GO:0060449|GO:0007601|GO:0016491|GO:0001656|GO:0002138|GO:0014032|GO:0048568|GO:0005624|GO:0005575|GO:0005783|GO:0055114	NM_133832	Mm.274376	98711	ENSMUST00000027053	TC1581628
A_52_P681659	0.00276036	1.52764	down	116.624	188.502	0.680343	1.29165	112.546	110.948	107.544	122.859	106.047	139.798	163.202	202.74	199.564	0.541325	0.573213	0.609701	0.9266	0.958395	0.472824	1.1287	1.38747	1.35879	NM_001081230	chr3:82198889-82198948	Mtap9	Mus musculus microtubule-associated protein 9 (Mtap9), mRNA [NM_001081230]	GO:0007067|GO:0005874|GO:0005856|GO:0005737|GO:0051301|GO:0007049	NM_001081230	Mm.271269	213582	ENSMUST00000091014	TC1701579
A_51_P120830	7.66868e-07	9.46916	down	467.551	4604.1	2.66478	5.90802	465.215	350.182	390.357	551.582	441.275	606.694	4498.73	4495.73	4817.85	2.58871	2.23143	2.46957	3.09317	3.01537	2.59045	5.91349	5.85832	5.95226	NM_019471	chr9:7510011-7510070	Mmp10	Mus musculus matrix metallopeptidase 10 (Mmp10), mRNA [NM_019471]	GO:0005576|GO:0004222|GO:0008233|GO:0005578|GO:0005509|GO:0006508|GO:0016787|GO:0046872|GO:0008152|GO:0008270|GO:0031012|GO:0030574|GO:0008237	NM_019471	Mm.14126	17384	ENSMUST00000034488	TC1589009
A_52_P47660	0.0154334	1.70178	up	66.107	41.7031	-0.148716	-0.915762	59.91	76.7071	50.1951	63.5001	66.7378	79.5922	55.7795	34.6708	34.6588	-0.368319	0.0407577	-0.489607	-0.0255718	0.290265	-0.339818	-0.42015	-1.16037	-1.16677	NM_011856	chr11:35821660-35821601	Odz2	Mus musculus odd Oz/ten-m homolog 2 (Drosophila) (Odz2), mRNA [NM_011856]	GO:0005887|GO:0016020|GO:0008150|GO:0003674|GO:0016021|GO:0007165	NM_011856	Mm.439889	23964	ENSMUST00000057207	TC1581934
A_52_P174000	0.0556952	2.03915	down	3274.58	6313.11	5.33514	6.36311	5273.37	4542.04	4352.41	1933.24	1565.06	1981.35	6307.4	6013.53	6618.39	6.09147	5.92859	5.94852	4.90254	4.84183	4.29789	6.40102	6.27798	6.41035	AB070542	chr12:116383745-116383686		Mus musculus VH186.2-D-J-IgG1 mRNA, partial cds, sequence:kec-5. [AB070542]			Mm.342187			NP592070
A_52_P64356	0.0123361	1.58521	up	27400.7	18298.4	8.54785	7.88318	25060.1	28528.1	21524.1	26126.1	28350.2	34815.5	22201.5	15662.1	17031.6	8.34006	8.57957	8.25458	8.65894	9.0209	8.43307	8.21655	7.65897	7.77401	NM_010097	chr5:104508208-104508149	Sparcl1	Mus musculus SPARC-like 1 (Sparcl1), mRNA [NM_010097]	GO:0005576|GO:0045202|GO:0007165|GO:0005578|GO:0005509	NM_010097	Mm.29027	13602	ENSMUST00000031249	TC1573824
A_51_P327657	0.00281728	1.50408	down	172.042	271.954	1.23792	1.82681	174.041	150.031	165.995	188.806	147.721	205.657	268.804	281.896	265.163	1.17024	1.00859	1.23592	1.5465	1.43656	1.02972	1.8486	1.863	1.76882	NM_031367	chr3:151422486-151422427	H28	Mus musculus histocompatibility 28 (H28), mRNA [NM_031367]	GO:0006955|GO:0005737	NM_031367	Mm.219544	15061	ENSMUST00000046739	NP437319
A_51_P231557	0.0843695	1.95211	up	444.093	221.821	2.46766	1.50263	271.251	210.052	304.57	668.547	507.414	702.723	180.972	288.101	196.392	1.81044	1.49407	2.11155	3.37063	3.21685	2.80244	1.2778	1.89441	1.33567	XM_887943	chr3:21652616-21652557	7530428D23Rik	PREDICTED: Mus musculus RIKEN cDNA 7530428D23 gene (7530428D23Rik), mRNA [XM_887943]	GO:0008150|GO:0003674|GO:0005575	XM_887943	Mm.304916	319506		TC1636565
A_51_P483280	0.000956042	1.60078	down	7060.61	11707.7	6.57521	7.25398	7623.11	8934.1	7076.32	5488.53	4948.34	8293.26	12405.2	11294.3	11423.6	6.62312	6.90458	6.6497	6.40795	6.50256	6.36335	7.37684	7.18728	7.19782	NM_011170	chr2:131763817-131763876	Prnp	Mus musculus prion protein (Prnp), mRNA [NM_011170]	GO:0005515|GO:0005886|GO:0045121|GO:0043066|GO:0006139|GO:0006979|GO:0051260|GO:0046688|GO:0006916|GO:0016020|GO:0006878|GO:0005737|GO:0046686|GO:0005507|GO:0005783|GO:0031225|GO:0005794	NM_011170	Mm.648	19122	ENSMUST00000091288	TC1573389
A_51_P120066	0.00146132	1.60132	up	1509.7	991.344	4.37249	3.69323	1547.99	1330.99	1406.22	1651.58	1332.02	1789.42	994.561	1003.5	975.975	4.32314	4.15775	4.31853	4.67537	4.60924	4.1509	3.7361	3.6948	3.64878	NR_033222	chr12:70300722-70300781	9330151L19Rik	Mus musculus RIKEN cDNA 9330151L19 gene (9330151L19Rik), non-coding RNA [NR_033222]	GO:0008150|GO:0003674|GO:0005575	NR_033222	Mm.256223	414085
A_52_P108346	0.00530784	1.57749	down	3263.86	5419.48	5.48407	6.1417	3257.99	2866.64	2909.57	3783.82	2995.27	3769.84	4996.81	5567.35	5694.29	5.39672	5.26461	5.36751	5.87137	5.7783	5.22591	6.06498	6.16675	6.19338	NM_010849	chr15:61821417-61821476	Myc	Mus musculus myelocytomatosis oncogene (Myc), transcript variant 1, mRNA [NM_010849]	GO:0050910|GO:0046982|GO:0006350|GO:0008633|GO:0016604|GO:0006309|GO:0005730|GO:0045449|GO:0005634|GO:0043473|GO:0003677|GO:0006919|GO:0006351|GO:0008284|GO:0010468|GO:0005819|GO:0003700|GO:0010553|GO:0045944|GO:0032091|GO:0048705|GO:0042981|GO:0030424|GO:0043085|GO:0042474|GO:0001836|GO:0003690|GO:0006355|GO:0006366|GO:0001783|GO:0030528|GO:0006006|GO:0043565|GO:0043279|GO:0007346|GO:0002904|GO:…	NM_010849	Mm.2444	17869	ENSMUST00000022971	TC1574039
A_51_P128320	0.0101856	1.52399	down	99527.4	158160	10.4023	11.0102	126882	104484	108906	91355.4	71657.1	93880.1	162155	150146	162179	10.6801	10.4524	10.5936	10.4649	10.3587	9.86416	11.0852	10.92	11.0253	NM_023566	chr7:148940000-148940059	Muc2	Mus musculus mucin 2 (Muc2), mRNA [NM_023566]	GO:0005576|GO:0030336|GO:0006917|GO:0006915|GO:0046983|GO:0005578|GO:0008285	NM_023566	Mm.2041	17831	ENSMUST00000042368	TC1728047
A_51_P377158	0.00318041	11.2844	down	1231.11	11877.6	3.69359	7.18984	497.611	391.085	429.11	2308.36	1735.97	2024.53	6756.36	13365.7	15510.8	2.68583	2.39081	2.60612	5.1584	4.99136	4.32899	6.50022	7.43023	7.63907				DFR10_MOUSE (Q64263) Defensin-related cryptdin, related sequence 10 precursor (Cryptdin-related protein 4C-4) (CRS4C), complete [TC1593310]						TC1593310
A_52_P43326	0.0222316	1.56758	up	175.115	115.236	1.2368	0.588265	150.197	177.95	114.253	198.065	171.092	239.132	116.266	117.238	112.202	0.957674	1.2548	0.697006	1.61558	1.64846	1.24729	0.639476	0.59728	0.528039	NM_009062	chr1:171672607-171672548	Rgs4	Mus musculus regulator of G-protein signaling 4 (Rgs4), mRNA [NM_009062]	GO:0009968|GO:0005829|GO:0005624|GO:0007186|GO:0005737|GO:0004871|GO:0005096	NM_009062	Mm.41642	19736	ENSMUST00000111357	TC1588279
A_52_P121942	0.00984071	1.95011	down	315.133	627.073	2.06724	3.03079	424.287	394.806	373.45	245.533	208.961	243.764	602.179	607.502	671.538	2.45585	2.40447	2.40569	1.92552	1.93692	1.27497	3.01223	2.97072	3.10941		chr6:70592738-70592797
A_52_P659312	3.37959e-05	3.7611	down	136.717	549.458	0.90763	2.81878	130.288	118.763	121.418	146.884	139.859	163.091	419.027	590.947	638.4	0.752518	0.671406	0.78476	1.18428	1.35766	0.695163	2.48909	2.93086	3.0364	NM_145134	chr9:96843964-96843905	Spsb4	Mus musculus splA/ryanodine receptor domain and SOCS box containing 4 (Spsb4), mRNA [NM_145134]	GO:0008150|GO:0003674|GO:0005737|GO:0005575	NM_145134	Mm.367813	211949	ENSMUST00000055433	TC1579378
A_52_P14453	0.01708	1.88306	up	216.606	116.602	1.51859	0.605516	299.161	260.858	264.441	182.894	132.311	159.971	116.161	116.15	117.496	1.95174	1.80659	1.90772	1.5006	1.27762	0.667297	0.638173	0.58382	0.594554	NM_009124	chr13:45651048-45650989	Atxn1	Mus musculus ataxin 1 (Atxn1), mRNA [NM_009124]	GO:0005515|GO:0042405|GO:0003723|GO:0005488|GO:0042326|GO:0045944|GO:0060079|GO:0008344|GO:0016363|GO:0005634|GO:0043569|GO:0005737|GO:0008542	NM_009124	Mm.476983	20238	ENSMUST00000091628	TC1582797
A_51_P364168	0.0281133	1.55704	down	880.261	1428.3	3.57771	4.21651	829.388	671.094	705.819	1082.18	902.05	1091.03	1292.61	1459.97	1532.3	3.42286	3.16984	3.32407	4.06547	4.0469	3.4371	4.11426	4.23571	4.29957	AF064984	chr19:3584930-3584870	Lrp5	Mus musculus low-density lipoprotein receptor-related protein 5 (Lrp5) mRNA, complete cds. [AF064984]	GO:0006897|GO:0004872|GO:0016020|GO:0042733|GO:0007275|GO:0005739|GO:0016055|GO:0016021|GO:0042074|GO:0009952|GO:0001702		Mm.274581	16973
A_52_P318673	0.000988556	1.64293	up	79591.1	51037	10.0899	9.37361	91026.4	83309.3	83644.1	74668.6	60618.9	84279.4	53376.4	54930.7	44803.9	10.201	10.1257	10.2129	10.174	10.1173	9.70852	9.4821	9.4693	9.16942	NM_009117	chr7:53996129-53996070	Saa1	Mus musculus serum amyloid A 1 (Saa1), mRNA [NM_009117]	GO:0005576|GO:0005515|GO:0008203|GO:0005615|GO:0006953|GO:0034364	NM_009117	Mm.148800	20208	ENSMUST00000128088	TC1582999
A_52_P56818	0.0163671	1.6775	up	374.165	231.839	2.3342	1.58789	494.005	454.81	401.762	277.698	289.659	327.056	269.363	209.28	216.875	2.67534	2.60859	2.51112	2.10311	2.40804	1.69902	1.85159	1.43327	1.47881	NM_053242	chr6:15389279-15389338	Foxp2	Mus musculus forkhead box P2 (Foxp2), transcript variant 1, mRNA [NM_053242]	GO:0040007|GO:0046982|GO:0006350|GO:0048745|GO:0016566|GO:0030324|GO:0050679|GO:0045449|GO:0005634|GO:0046872|GO:0003677|GO:0016481|GO:0021549|GO:0048286|GO:0043010|GO:0008270|GO:0005622|GO:0005515|GO:0003700|GO:0042297|GO:0006355|GO:0042803|GO:0009791|GO:0043565|GO:0007519|GO:0002053|GO:0009790|GO:0060013|GO:0005575|GO:0000122|GO:0016564	NM_053242	Mm.332919	114142	ENSMUST00000031545	TC1582291
A_51_P160713	0.00271167	1.50318	up	459.449	321.96	2.65755	2.06953	518.129	427.961	430.44	486.381	388.382	505.402	303.19	334.215	328.474	2.74412	2.52081	2.61059	2.91168	2.83116	2.32691	2.02226	2.10861	2.07772	NM_009654	chr5:90901598-90901657	Alb	Mus musculus albumin (Alb), mRNA [NM_009654]	GO:0005504|GO:0005576|GO:0043498|GO:0005604|GO:0005615|GO:0006950|GO:0006810|GO:0008289|GO:0046010|GO:0046872|GO:0005737|GO:0008270|GO:0008144	NM_009654	Mm.16773	11657	ENSMUST00000031314	TC1747794
A_52_P150851	0.000608486	2.07318	down	63.2101	136.671	-0.223097	0.828748	60.7871	60.102	45.5137	68.1124	58.378	86.3671	147.364	119.758	142.891	-0.347349	-0.31119	-0.630852	0.0755887	0.0971847	-0.221964	0.98143	0.627955	0.876858	AK028812	chr15:11278486-11278545	Adamts12	Mus musculus 10 days neonate skin cDNA, RIKEN full-length enriched library, clone:4732458B12 product:similar to ADAMTS-12 PRECURSOR (EC 3.4.24.-) (A DISINTEGRIN AND METALLOPROTEINASE WITH THROMBOSPONDIN MOTIFS 12) (ADAM-TS 12) (ADAM- TS12) [Homo sapiens], full insert sequence. [AK028812]	GO:0005576|GO:0008150|GO:0004222|GO:0008233|GO:0005578|GO:0006508|GO:0016787|GO:0003674|GO:0046872|GO:0008270|GO:0031012|GO:0008237|GO:0005575		Mm.224825	239337		TC1650038
A_52_P253291	5.58194e-06	1.67786	down	60.4487	105.744	-0.288536	0.458087	59.9944	63.4524	59.7197	53.3705	43.2349	82.92	93.9685	104.862	118.403	-0.366287	-0.232926	-0.238946	-0.276288	-0.336042	-0.280725	0.332291	0.436329	0.605641		chr18:090760777-090760836
A_51_P267783	3.34252e-05	2.42153	down	124.089	313.534	0.746652	2.02257	104.105	113.193	128.206	117.201	100.215	181.613	309.935	270.229	360.439	0.428848	0.602112	0.863236	0.858583	0.876785	0.850348	2.05401	1.80202	2.21169	NM_008350	chr7:4724906-4724847	Il11	Mus musculus interleukin 11 (Il11), mRNA [NM_008350]	GO:0050731|GO:0005576|GO:0033138|GO:0005142|GO:0005125|GO:0005615|GO:0045944|GO:0008083|GO:0043410|GO:0046888|GO:0008284	NM_008350	Mm.35814	16156	ENSMUST00000094892	TC1592701
A_52_P208763	0.0255302	1.67586	down	471.62	809.362	2.6557	3.40059	674.567	528.74	537.953	402.882	319.801	365.776	809.755	795.9	822.43	3.12478	2.82588	2.93226	2.63996	2.55086	1.86044	3.43953	3.36042	3.40183	NM_013654	chr11:81860504-81860563	Ccl7	Mus musculus chemokine (C-C motif) ligand 7 (Ccl7), mRNA [NM_013654]	GO:0005576|GO:0006955|GO:0006954|GO:0005125|GO:0005615|GO:0006935|GO:0008009|GO:0008201	NM_013654	Mm.341574	20306	ENSMUST00000021011	NP063488
A_51_P328857	0.0128663	2.21157	up	151.965	68.4822	0.977838	-0.167233	124.341	104.646	84.9839	196.182	162.434	239.201	61.2354	74.9956	69.2156	0.685111	0.488842	0.270036	1.60179	1.57354	1.2477	-0.28552	-0.047287	-0.16889	NM_021041	chr6:142538060-142538001	Abcc9	Mus musculus ATP-binding cassette, sub-family C (CFTR/MRP), member 9 (Abcc9), transcript variant 2, mRNA [NM_021041]	GO:0004872|GO:0005886|GO:0005524|GO:0055085|GO:0016887|GO:0005267|GO:0005739|GO:0000166|GO:0006810|GO:0016020|GO:0042626|GO:0019905|GO:0005624|GO:0017111|GO:0030315|GO:0008281|GO:0051607|GO:0030017|GO:0016021|GO:0006813|GO:0008144	NM_021041	Mm.35670	20928	ENSMUST00000087527	NP375649
A_52_P771481	1.083e-05	2.27198	down	45.5576	108.909	-0.678661	0.505289	47.2349	40.0444	45.1606	44.3989	40.2358	56.2711	103.072	107.524	116.13	-0.711261	-0.897001	-0.642087	-0.541807	-0.43976	-0.840052	0.465693	0.472493	0.577681	AK078079	chr14:13496743-13496684		Mus musculus adult male medulla oblongata cDNA, RIKEN full-length enriched library, clone:6330437K14 product:unclassifiable, full insert sequence. [AK078079]
A_51_P378545	0.0411996	1.56451	up	2129.45	1435.12	4.85299	4.20728	1854.53	1994.95	1585.24	2056.28	2554.52	2731.17	1724.79	1432.22	1148.37	4.58379	4.74161	4.4914	4.99156	5.54867	4.76093	4.53039	4.20801	3.88345	NM_028030	chr9:65508077-65508136	Rbpms2	Mus musculus RNA binding protein with multiple splicing 2 (Rbpms2), mRNA [NM_028030]	GO:0003676|GO:0008150|GO:0003674|GO:0000166|GO:0005575	NM_028030	Mm.29148	71973	ENSMUST00000055844	TC1576073
A_51_P400190	0.0170711	1.53739	down	47.4464	74.6439	-0.674879	-0.0543942	59.53	49.5831	52.8603	39.4713	23.8528	59.3807	60.3586	87.2704	76.3026	-0.377498	-0.588753	-0.414969	-0.711525	-1.19408	-0.762453	-0.306326	0.1714	-0.0282564	NM_020557	chr12:27158988-27159047	Cmpk2	Mus musculus cytidine monophosphate (UMP-CMP) kinase 2, mitochondrial (Cmpk2), nuclear gene encoding mitochondrial protein, mRNA [NM_020557]	GO:0005524|GO:0016740|GO:0004127|GO:0016301|GO:0006221|GO:0005739|GO:0000166	NM_020557	Mm.271839	22169	ENSMUST00000085526	TC1700124
A_52_P596541	0.000859019	1.80982	down	1331.35	2563.28	4.19441	5.05026	1387.16	1251.78	1302.41	1445.95	1133.31	1467.51	2105.4	2650.37	2934.06	4.16487	4.06924	4.20789	4.48354	4.37616	3.86478	4.81807	5.09596	5.23677	NM_133950	chr7:53138602-53138661	Kdelr1	Mus musculus KDEL (Lys-Asp-Glu-Leu) endoplasmic reticulum protein retention receptor 1 (Kdelr1), mRNA [NM_133950]	GO:0004872|GO:0016192|GO:0016020|GO:0008150|GO:0003674|GO:0015031|GO:0046923|GO:0006621|GO:0016021|GO:0005575|GO:0006810|GO:0005783	NM_133950	Mm.298433	68137	ENSMUST00000107719	TC1575183
A_52_P222624	0.0348665	1.57458	up	488.326	325.703	2.72983	2.07486	451.017	425.203	376.348	461.32	601.315	614.75	374.531	331.532	271.046	2.544	2.51148	2.41684	2.83537	3.46181	2.60948	2.32713	2.09699	1.80048	NM_024441	chr9:50559270-50559211	Hspb2	Mus musculus heat shock protein 2 (Hspb2), transcript variant 1, mRNA [NM_024441]	GO:0007525|GO:0006950|GO:0009408|GO:0005625	NM_024441	Mm.1980	69253	ENSMUST00000042790	TC1586498
A_52_P420504	0.0390888	1.55239	up	124133	84150.5	10.7185	10.084	102825	116215	93408.9	131160	140343	160848	101670	80232.2	70549.5	10.3768	10.6059	10.3722	10.9867	11.3284	10.641	10.4117	10.0159	9.82443	NM_007392	chr19:34316119-34316060	Acta2	Mus musculus actin, alpha 2, smooth muscle, aorta (Acta2), mRNA [NM_007392]	GO:0005515|GO:0014829|GO:0008217|GO:0005524|GO:0005856|GO:0005737|GO:0030485|GO:0015629|GO:0000166	NM_007392	Mm.213025	11475	ENSMUST00000039631	NP842934
A_52_P423222	0.0366893	3.61164	down	100.782	305.549	0.12631	1.97897	46.9671	29.1352	43.8316	183.81	128.303	172.645	243.218	332.584	340.844	-0.719465	-1.35584	-0.685181	1.50781	1.23325	0.777289	1.70429	2.10156	2.13105	NM_010903	chr6:51408131-51408190	Nfe2l3	Mus musculus nuclear factor, erythroid derived 2, like 3 (Nfe2l3), mRNA [NM_010903]	GO:0005634|GO:0043565|GO:0003700|GO:0006350|GO:0003677|GO:0046983|GO:0006355|GO:0045449	NM_010903	Mm.42138	18025	ENSMUST00000005103	TC1580069
A_52_P23225	0.0183796	1.74954	down	157.71	280.297	1.0635	1.87047	135.189	226.518	97.5161	124.084	160.257	202.696	279.454	272.448	288.989	0.805786	1.60295	0.468487	0.94091	1.55407	1.0088	1.90465	1.81381	1.89296	NM_016697	chrX:49625799-49625740	Gpc3	Mus musculus glypican 3 (Gpc3), mRNA [NM_016697]	GO:0045926|GO:0005515|GO:0005576|GO:0043395|GO:0010171|GO:0005886|GO:0009887|GO:0045807|GO:0045879|GO:0005578|GO:0030414|GO:0005764|GO:0030513|GO:0005887|GO:0016020|GO:0001658|GO:0045732|GO:0046658|GO:0031225|GO:0008285	NM_016697	Mm.22515	14734	ENSMUST00000069360	TC1572110
A_51_P490509	0.00688762	1.76943	down	302.733	560.019	2.03915	2.86244	276.094	227.233	269.184	370.671	290.784	382.435	486.951	576.752	616.354	1.83597	1.6075	1.93337	2.51974	2.41364	1.9247	2.70582	2.89579	2.9857	NM_009773	chr2:118466830-118466889	Bub1b	Mus musculus budding uninhibited by benzimidazoles 1 homolog, beta (S. cerevisiae) (Bub1b), mRNA [NM_009773]	GO:0004672|GO:0007067|GO:0005524|GO:0016740|GO:0051301|GO:0000166|GO:0007049|GO:0005634|GO:0004674|GO:0007091|GO:0000940|GO:0016301|GO:0006468|GO:0005737|GO:0006915|GO:0000776	NM_009773	Mm.29133	12236	ENSMUST00000038341	TC1575535
A_51_P458258	0.0869102	1.50958	up	3382.12	2270.98	5.48107	4.88692	4989.07	4160.27	3845.11	2493.63	2303.93	2500.72	2120.43	2431.64	2260.87	6.01151	5.80193	5.76973	5.26978	5.39971	4.63375	4.82833	4.97169	4.86075	NM_011888	chr4:42250432-42250491	Ccl19	Mus musculus chemokine (C-C motif) ligand 19 (Ccl19), mRNA [NM_011888]	GO:0005576|GO:0006955|GO:0006954|GO:0005125|GO:0005615|GO:0006935|GO:0008009	NM_011888	Mm.459263	24047	ENSMUST00000102957	TC1584110
A_51_P353221	0.00427377	2.00712	up	6224.86	3197.01	6.38768	5.38255	8232.51	7105.01	7285.42	5398.9	4317.76	5009.56	3167.15	3202.4	3221.47	6.73407	6.57409	6.69172	6.38419	6.3059	5.63609	5.40716	5.36892	5.37159	NM_011582	chr13:93525179-93525120	Thbs4	Mus musculus thrombospondin 4 (Thbs4), mRNA [NM_011582]	GO:0005518|GO:0007399|GO:0031594|GO:0005515|GO:0005576|GO:0048812|GO:0005198|GO:0005578|GO:0005509|GO:0051260|GO:0007155|GO:0043237|GO:0001968	NM_011582	Mm.20865	21828	ENSMUST00000022213	TC1580565
A_51_P499551	0.000425306	1.86053	down	192.412	374.729	1.3938	2.28952	236.532	196.188	203.459	181.634	143.595	193.067	376.254	365.29	382.643	1.61285	1.39556	1.52951	1.49063	1.39569	0.938581	2.33375	2.23688	2.29794	NM_133983	chr9:58372150-58372107	Cd276	Mus musculus CD276 antigen (Cd276), mRNA [NM_133983]	GO:0045077|GO:0016020|GO:0045669|GO:0042130|GO:0045085|GO:0050728|GO:0050776|GO:0009897|GO:0016021|GO:0005102|GO:0030501	NM_133983	Mm.5356	102657	ENSMUST00000039788	TC1579025
A_51_P207550	0.0494495	1.54759	down	448.558	706.397	2.57398	3.204	637.46	537.86	521.049	343.381	290.963	360.637	692.977	695.7	730.513	3.04315	2.85056	2.8862	2.40941	2.41452	1.84003	3.21485	3.1663	3.23085	NM_023196	chr3:129581844-129591848	Pla2g12a	Mus musculus phospholipase A2, group XIIA (Pla2g12a), transcript variant 1, mRNA [NM_023196]	GO:0016042|GO:0005576|GO:0016787|GO:0046872|GO:0006644|GO:0005737|GO:0005783|GO:0004623|GO:0005794|GO:0005622|GO:0005509	NM_023196	Mm.151951	66350	ENSMUST00000029629	TC1580570
A_51_P415395	0.000132526	2.10897	down	1097.89	2437.08	3.91077	4.98731	1309.97	1074.09	1121.24	1089.27	855.08	1137.7	2590.65	2196.98	2523.62	4.08228	3.84837	3.9918	4.07489	3.96975	3.49753	5.11729	4.82528	5.01936	NM_001081314	chr9:67608565-67608624	C2cd4b	Mus musculus C2 calcium-dependent domain containing 4B (C2cd4b), mRNA [NM_001081314]	GO:0008150|GO:0003674|GO:0005575	NM_001081314	Mm.105353	75697	ENSMUST00000068526	TC1584156
A_52_P53144	0.00033167	1.94366	down	652.145	1314.18	3.13767	4.09645	514.936	695.538	551.211	656.314	545.764	949.108	1216.83	1285.63	1440.07	2.73521	3.22146	2.96738	3.34398	3.32197	3.23605	4.0271	4.05224	4.21001	NM_028087	chr9:69881839-69881780	Gcnt3	Mus musculus glucosaminyl (N-acetyl) transferase 3, mucin type (Gcnt3), mRNA [NM_028087]	GO:0016757|GO:0006493|GO:0016020|GO:0008109|GO:0016740|GO:0008375|GO:0016021|GO:0005575|GO:0005794|GO:0003829	NM_028087	Mm.195555	72077	ENSMUST00000034751	TC1586320
A_51_P470475	0.00200289	2.05247	down	309.775	664.225	2.07494	3.1123	248.342	240.392	320.886	351.011	308.207	389.812	602.177	688.163	702.334	1.68314	1.68871	2.18684	2.44111	2.49759	1.95226	3.01223	3.15059	3.1741	NR_029414	chr15:63756833-63756892	Gsdmcl-ps	Mus musculus gasdermin C-like, pseudogene (Gsdmcl-ps), non-coding RNA [NR_029414]		NR_029414	Mm.390801	74460		TC1600140
A_51_P438853	0.00348857	7.36652	down	100.663	639.675	0.175676	3.05666	53.4541	34.8205	41.885	182.756	134.004	157.058	568.771	674.125	676.129	-0.532815	-1.09867	-0.750719	1.49951	1.29596	0.640781	2.92989	3.12085	3.11924	NM_025867	chr1:109276756-109276815	Serpinb11	Mus musculus serine (or cysteine) peptidase inhibitor, clade B (ovalbumin), member 11 (Serpinb11), mRNA [NM_025867]	GO:0005737|GO:0004867|GO:0030414	NM_025867	Mm.12638	66957	ENSMUST00000027566	TC1584599
A_51_P450561	1.25595e-05	2.98021	up	140.799	47.8948	0.894695	-0.680717	165.457	145.033	149.462	100.902	81.3638	202.575	51.1237	48.3821	44.1787	1.09727	0.959709	1.08455	0.642554	0.576147	1.00794	-0.545895	-0.679619	-0.816638	NM_153484	chr15:81654218-81654277	Tef	Mus musculus thyrotroph embryonic factor (Tef), transcript variant 2, mRNA [NM_153484]	GO:0005515|GO:0003700|GO:0006350|GO:0045944|GO:0003690|GO:0006355|GO:0046983|GO:0045449|GO:0005634|GO:0016563|GO:0043565|GO:0003677|GO:0048511	NM_153484	Mm.270278	21685	ENSMUST00000023024	TC1581867
A_52_P343293	0.00619821	1.8565	down	2728.94	5218.49	5.19527	6.08785	3700.99	3034.04	3199.68	2296.01	1833.6	2309.34	4894.54	5263.82	5497.11	5.58065	5.3465	5.50463	5.15066	5.07029	4.51889	6.03514	6.08587	6.14254	NR_033563	chr7:107413190-107413252	Gpx2-ps1	Mus musculus glutathione peroxidase 2, pseudogene 1 (Gpx2-ps1), non-coding RNA [NR_033563]		NR_033563		14777
A_51_P150912	0.0299194	1.80026	down	749.179	1378.04	3.31771	4.16592	582.288	513.643	572.336	1008	841.599	977.204	1306.37	1333.07	1494.68	2.91254	2.78409	3.02164	3.96303	3.94682	3.27814	4.12954	4.10452	4.2637	NM_011497	chr2:172181793-172181734	Aurka	Mus musculus aurora kinase A (Aurka), mRNA [NM_011497]	GO:0004672|GO:0005819|GO:0005515|GO:0007067|GO:0005524|GO:0016740|GO:0005874|GO:0051301|GO:0000166|GO:0007049|GO:0031625|GO:0000278|GO:0004674|GO:0016301|GO:0006468|GO:0005737|GO:0005856|GO:0005813	NM_011497	Mm.249363	20878	ENSMUST00000028997	TC1572434
A_51_P343336	0.01628	1.84704	down	919.813	1728.38	3.60357	4.48879	1306.95	1104.1	1107.64	694.596	572.394	733.204	1567.94	1659.23	1957.98	4.07894	3.88813	3.97419	3.42577	3.3907	2.8637	4.39284	4.42028	4.65324	U55589	chr6:69808480-69808423		Ig kappa chain V-V region K2 Precursor; Fragment [Source:UniProtKB/Swiss-Prot;Acc:P01635] [ENSMUST00000103369]			Mm.304150		ENSMUST00000103369	TC1759274
A_51_P124741	4.32287e-05	1.59931	down	90.464	151.703	0.307609	0.985062	95.8996	83.191	91.2098	81.2305	76.5727	114.68	153.714	148.953	152.442	0.31041	0.157825	0.372036	0.329691	0.48859	0.1871	1.04229	0.942696	0.970199	NM_133485	chr10:6883117-6883058	Ppp1r14c	Mus musculus protein phosphatase 1, regulatory (inhibitor) subunit 14c (Ppp1r14c), mRNA [NM_133485]	GO:0005515|GO:0016020|GO:0005624|GO:0005737|GO:0004864|GO:0007165|GO:0042325|GO:0004865	NM_133485	Mm.308126	76142	ENSMUST00000043374	TC1601230
A_52_P650523	0.0291405	1.7214	down	83.2554	154.131	0.163362	0.946947	107.41	99.9818	93.2477	71.1029	54.8742	72.9156	96.2212	179.85	186.322	0.473943	0.423064	0.403915	0.137578	0.00788927	-0.466219	0.366468	1.21463	1.25974		chr15:37101792-37101733
A_52_P424650	0.0326466	1.85071	up	53.9559	29.8973	-0.50428	-1.39236	84.0853	66.4677	59.8566	40.0532	32.3071	40.9657	23.7292	39.2499	26.7128	0.120739	-0.165947	-0.235642	-0.690411	-0.75639	-1.29803	-1.65322	-0.981403	-1.54246	AK052336	chr8:46873111-46873170	Sorbs2	Mus musculus 13 days embryo heart cDNA, RIKEN full-length enriched library, clone:D330030I03 product:unclassifiable, full insert sequence. [AK052336]	GO:0003674|GO:0030054|GO:0005856|GO:0005737|GO:0008270|GO:0005575|GO:0005622		Mm.447653	234214		TC1616312
A_52_P376574	0.0461219	2.10303	down	1252.21	2564.91	3.98352	5.05599	791.353	754.377	715.185	1859.5	1528.66	1864.18	2177.33	2728.2	2789.2	3.35513	3.33861	3.34309	4.84644	4.80789	4.20995	4.86653	5.13772	5.16372	NM_011048	chr7:73195129-73195188	Pcsk6	Mus musculus proprotein convertase subtilisin/kexin type 6 (Pcsk6), mRNA [NM_011048]	GO:0016787|GO:0008236|GO:0007368|GO:0007354|GO:0008233	NM_011048	Mm.294007	18553	ENSMUST00000055576	TC1598112
A_52_P139650	0.0654354	1.61562	down	181.584	298.639	1.26537	1.95746	139.558	120.213	140.684	257.06	189.133	242.852	268.681	298.48	328.757	0.851681	0.688921	0.997237	1.99171	1.79309	1.26956	1.84793	1.94547	2.07896	NM_025581	chr18:74356670-74356611	Ska1	Mus musculus spindle and kinetochore associated complex subunit 1 (Ska1), transcript variant 1, mRNA [NM_025581]	GO:0008150|GO:0003674|GO:0007067|GO:0005874|GO:0005856|GO:0005737|GO:0051301|GO:0007049|GO:0005575|GO:0000776	NM_025581	Mm.283406	66468	ENSMUST00000040188	NP746065
A_51_P319070	0.0607877	1.71086	down	1748.93	2905.58	4.46959	5.24431	2518.14	2242.13	2343.48	1029.96	807.272	1552.63	2832.21	2890.35	2994.19	5.0251	4.91013	5.05535	3.99411	3.88674	3.94612	5.2459	5.22101	5.26603	NM_026159	chr6:72556656-72556715	Retsat	Mus musculus retinol saturase (all trans retinol 13,14 reductase) (Retsat), mRNA [NM_026159]	GO:0016020|GO:0005789|GO:0051786|GO:0016491|GO:0005640|GO:0042572|GO:0031965|GO:0005783|GO:0055114	NM_026159	Mm.305108	67442	ENSMUST00000129071	TC1598267
A_51_P472608	0.0116673	1.87498	down	111.262	214.819	0.575704	1.48258	104.753	73.4476	88.2397	145.021	110.134	145.978	192.061	231.553	220.843	0.437802	-0.0218859	0.324275	1.16586	1.01295	0.535229	1.36361	1.57917	1.50496	AK082938	chr1:173931441-173931382	Vangl2	vang-like 2 (van gogh, Drosophila) Gene [Source:MGI Symbol;Acc:MGI:2135272] [ENSMUST00000111263]	GO:0005515|GO:0048547|GO:0090175|GO:0045176|GO:0016020|GO:0005886|GO:0007275|GO:0016324|GO:0045197|GO:0001843|GO:0016021|GO:0035058		Mm.392110	93840	ENSMUST00000111263	TC1604915
A_52_P240693	0.0175402	1.98213	down	29.8225	59.7423	-1.34921	-0.362156	41.3625	34.7367	39.8839	19.7912	21.2892	21.8715	61.0953	54.6173	63.5141	-0.90279	-1.10214	-0.821346	-1.70747	-1.35812	-2.20339	-0.288824	-0.504734	-0.292911	NM_177587	chr1:94908593-94908652	Aqp12	Mus musculus aquaporin 12 (Aqp12), transcript variant 1, mRNA [NM_177587]	GO:0005215|GO:0016020|GO:0005737|GO:0016021|GO:0006810	NM_177587	Mm.235537	208760	ENSMUST00000059676	TC1584314
A_52_P224760	2.29853e-05	3.06816	down	35.5054	115.293	-1.03948	0.577891	43.0025	31.8061	38.3593	31.8548	30.7463	37.2634	96.4181	118.892	130.57	-0.846693	-1.2293	-0.877577	-1.02082	-0.827827	-1.43468	0.369419	0.617493	0.74676	NM_011198	chr1:151954416-151954475	Ptgs2	Mus musculus prostaglandin-endoperoxide synthase 2 (Ptgs2), mRNA [NM_011198]	GO:0004601|GO:0004666|GO:0006954|GO:0005634|GO:0046872|GO:0016020|GO:0008217|GO:0001516|GO:0042640|GO:0020037|GO:0046697|GO:0016702|GO:0008285|GO:0005792|GO:0034097|GO:0008610|GO:0005515|GO:0030728|GO:0051968|GO:0051926|GO:0006633|GO:0005901|GO:0007613|GO:0045987|GO:0045907|GO:0043234|GO:0016491|GO:0030282|GO:0030216|GO:0031915|GO:0043065|GO:0042127|GO:0032227|GO:0006979|GO:0008289|GO:0048661|GO:…	NM_011198	Mm.292547	19225	ENSMUST00000035065	TC1575619
A_52_P153541	0.0397062	1.50746	up	87.0125	59.2028	0.219035	-0.37308	111.038	100.727	101.368	82.8328	50.7306	75.3777	59.3844	61.4529	56.7713	0.521869	0.433778	0.524385	0.357872	-0.105385	-0.418309	-0.329802	-0.334611	-0.454827	XM_001474767	chr16:13674011-13674070		PREDICTED: Mus musculus hypothetical protein LOC100045525 (LOC100045525), mRNA [XM_001474767]		XM_001474767	Mm.223689
A_51_P233928	0.000102177	2.11405	down	1561.33	3433.03	4.40436	5.48438	1743.39	1838.9	1747.04	1254.92	1101.17	1682.57	3607.79	3310.37	3380.92	4.49463	4.62409	4.63161	4.27912	4.33465	4.06208	5.59509	5.41675	5.44129	NM_008080	chr10:126609172-126609231	B4galnt1	Mus musculus beta-1,4-N-acetyl-galactosaminyl transferase 1 (B4galnt1), transcript variant 1, mRNA [NM_008080]	GO:0005886|GO:0001574|GO:0016740|GO:0016758|GO:0019915|GO:0006687|GO:0007283|GO:0003947|GO:0016757|GO:0030173|GO:0008376|GO:0016020|GO:0030259|GO:0016021|GO:0005794	NM_008080	Mm.386762	14421	ENSMUST00000006914	TC1578394
A_51_P314135	0.0431564	1.80737	up	62.3244	34.9732	-0.284163	-1.13806	51.9912	41.6029	41.2455	91.3717	69.1453	78.5897	30.6257	35.9787	38.3152	-0.572848	-0.841918	-0.772916	0.499417	0.341393	-0.358105	-1.28514	-1.10695	-1.02207	NM_021481	chr9:44494224-44494283	Treh	Mus musculus trehalase (brush-border membrane glycoprotein) (Treh), mRNA [NM_021481]	GO:0016787|GO:0016020|GO:0016798|GO:0009887|GO:0008152|GO:0005886|GO:0004555|GO:0005991|GO:0003824|GO:0031225|GO:0005903	NM_021481	Mm.45380	58866	ENSMUST00000139389	TC1585849
A_52_P214437	0.0502803	1.86621	down	1135.37	2071.28	3.85171	4.75182	1756.41	1468.67	1467.94	756.358	593.299	769.566	1877.48	2055.55	2280.81	4.50537	4.29977	4.3805	3.54867	3.44245	2.93353	4.65277	4.72929	4.87342		chr12:116624969-116624910
A_51_P333839	0.019241	1.55362	down	128.726	207.014	0.795729	1.43136	90.7109	136.267	106.402	143.711	117.881	177.384	211.245	191.208	218.589	0.23016	0.869764	0.594303	1.15277	1.11102	0.816361	1.50096	1.30298	1.49016	NM_019971	chr3:81017419-81017478	Pdgfc	Mus musculus platelet-derived growth factor, C polypeptide (Pdgfc), mRNA [NM_019971]	GO:0005161|GO:0005634|GO:0005576|GO:0048008|GO:0016020|GO:0009887|GO:0050730|GO:0051781|GO:0007171|GO:0005737|GO:0008083|GO:0008284	NM_019971	Mm.331089	54635	ENSMUST00000129285	TC1576974
A_51_P501260	0.00046632	2.2053	down	100.592	233.644	0.461342	1.60232	112.82	80.8743	107.918	111.802	84.969	105.169	204.396	247.061	249.475	0.544833	0.11708	0.614714	0.790538	0.638698	0.0621877	1.45341	1.6727	1.68084	NM_145713	chr13:23649203-23649262	Hist1h1d	Mus musculus histone cluster 1, H1d (Hist1h1d), mRNA [NM_145713]	GO:0005634|GO:0005515|GO:0003677|GO:0016584|GO:0000786|GO:0005694|GO:0006334	NM_145713	Mm.247046	14957	ENSMUST00000045301	TC1587801
A_51_P133138	0.00979381	1.84734	down	1881.16	3600.48	4.66746	5.55291	1628.84	1356.97	1589.27	2374.1	1968.38	2369.4	3411.4	3633.66	3756.38	4.39658	4.18564	4.49507	5.1989	5.17262	4.55593	5.51434	5.55119	5.59321	Y09632	chr18:34792278-34792337	Kif20a	Mus musculus mRNA for rabkinesin-6. [Y09632]	GO:0015031|GO:0005524|GO:0005874|GO:0007018|GO:0003774|GO:0000166|GO:0006810|GO:0003777|GO:0005794		Mm.258846	19348		TC1781904
A_51_P123405	0.0179245	1.76462	down	618.905	1119.43	3.04607	3.86543	516.812	422.841	492.422	792.573	615.979	872.802	1018.55	1147.42	1192.32	2.74045	2.50344	2.80467	3.61614	3.49657	3.11514	3.77048	3.88816	3.93764	NM_009772	chr2:127627047-127626988	Bub1	Mus musculus budding uninhibited by benzimidazoles 1 homolog (S. cerevisiae) (Bub1), transcript variant 2, mRNA [NM_009772]	GO:0004672|GO:0071173|GO:0007059|GO:0007067|GO:0005524|GO:0016740|GO:0051301|GO:0000166|GO:0007049|GO:0000780|GO:0005634|GO:0000775|GO:0004674|GO:0016301|GO:0006468|GO:0009790|GO:0006915|GO:0000776	NM_009772	Mm.2185	12235	ENSMUST00000028858	TC1576690
A_52_P154971	0.00276347	1.53931	up	430.699	293.749	2.56076	1.93848	404.314	411.442	379.007	483.043	380.227	526.158	296.633	291.089	293.525	2.38629	2.46401	2.427	2.90175	2.80055	2.38498	1.99072	1.9093	1.91542	NM_011978	chr2:126413550-126413609	Slc27a2	Mus musculus solute carrier family 27 (fatty acid transporter), member 2 (Slc27a2), mRNA [NM_011978]	GO:0005792|GO:0005777|GO:0005515|GO:0004467|GO:0005524|GO:0005739|GO:0000166|GO:0003824|GO:0042760|GO:0001676|GO:0006629|GO:0031957|GO:0016020|GO:0008152|GO:0006631|GO:0015245|GO:0015908|GO:0000038|GO:0016021|GO:0005783|GO:0016874	NM_011978	Mm.290044	26458	ENSMUST00000099438	TC1714436
A_51_P395921	0.00487715	1.53995	down	823.806	1347.02	3.49988	4.12275	863.393	726.567	773.092	882.683	734.977	962.124	1101.5	1467.6	1471.95	3.48083	3.28442	3.45541	3.77149	3.75139	3.2557	3.88344	4.24322	4.2416	NM_033607	chr9:64083589-64083648	Uchl4	Mus musculus ubiquitin carboxyl-terminal esterase L4 (Uchl4), mRNA [NM_033607]	GO:0004221|GO:0016787|GO:0006511|GO:0005737|GO:0008233|GO:0008234|GO:0005622	NM_033607	Mm.390180	93841	ENSMUST00000039011	NP401823
A_52_P365615	0.0908015	1.58584	down	5267.64	8492.07	6.09957	6.76482	2826.17	5730.15	3744.85	5831.83	5026.64	8446.21	6301.93	9856.65	9317.62	5.19159	6.26383	5.73161	6.49548	6.52521	6.38971	6.39976	6.99086	6.90383	NM_172759	chr8:107458425-107458484	Ces5	Mus musculus carboxylesterase 5 (Ces5), transcript variant 1, mRNA [NM_172759]	GO:0016787|GO:0008150|GO:0004091|GO:0005575	NM_172759	Mm.441134	234673	ENSMUST00000034355	TC1583226
A_51_P452533	0.0790788	2.03366	up	174.266	81.4952	1.09784	0.073764	99.8501	98.1301	89.2563	257.878	217.716	282.767	76.0066	70.3337	98.1452	0.368649	0.396094	0.340801	1.99629	1.99614	1.4891	0.0262394	-0.139876	0.334929	NM_001164528	chr1:168246642-168246701	Ildr2	Mus musculus immunoglobulin-like domain containing receptor 2 (Ildr2), mRNA [NM_001164528]	GO:0031016|GO:0048873|GO:0030154|GO:0030073|GO:0009749	NM_001164528	Mm.101743	100039795	ENSMUST00000111416	TC1602318
A_52_P350512	0.00102422	1.60786	down	102.725	172.459	0.484424	1.16957	125.098	112.822	105.473	91.9295	73.7894	107.237	167.257	170.748	179.372	0.693868	0.597376	0.581646	0.508198	0.435173	0.0902834	1.16411	1.13971	1.20489	NM_145996	chr1:36376575-36376634	Arid5a	Mus musculus AT rich interactive domain 5A (MRF1-like) (Arid5a), transcript variant 3, mRNA [NM_145996]	GO:0005634|GO:0008150|GO:0006350|GO:0003674|GO:0003677|GO:0005575|GO:0045449|GO:0005622	NM_145996	Mm.34316	214855	ENSMUST00000097779	TC1578306
A_51_P296456	0.06815	1.62403	up	131.513	81.6036	0.788154	0.0885771	190.32	168.132	155.879	93.0367	89.3229	92.3909	86.6303	82.1601	76.0205	1.29924	1.17292	1.1452	0.52547	0.71079	-0.124696	0.214986	0.0843449	-0.0335994	NM_001081379	chr8:125416651-125416592	Ankrd11	Mus musculus ankyrin repeat domain 11 (Ankrd11), mRNA [NM_001081379]	GO:0003674|GO:0060323|GO:0001701|GO:0001894|GO:0060348|GO:0048705|GO:0005575|GO:0035264	NM_001081379	Mm.31567	77087	ENSMUST00000039345	TC1697613
A_52_P868302	0.0142261	1.57099	up	148.698	97.9629	1.00062	0.348941	186.769	182.674	166.345	116.399	100.697	139.3	86.4981	105.493	101.897	1.27207	1.2926	1.23896	0.84868	0.883709	0.467681	0.212783	0.444984	0.389056	AK163034	chr9:65162940-65162999	Clpx	Mus musculus 0 day neonate thymus cDNA, RIKEN full-length enriched library, clone:A430088F02 product:caseinolytic protease X (E.coli), full insert sequence. [AK163034]	GO:0005515|GO:0046872|GO:0008150|GO:0051082|GO:0005524|GO:0017111|GO:0016887|GO:0006457|GO:0005739|GO:0000166|GO:0005743		Mm.30088	270166		TC1600724
A_52_P475356	0.00013228	2.3766	down	37.8857	94.1544	-0.958122	0.290776	31.0695	34.545	34.0656	42.5471	33.4105	51.6762	82.8974	95.5332	104.033	-1.31562	-1.11012	-1.04884	-0.603269	-0.707938	-0.962946	0.151441	0.301909	0.418977	NM_011445	chr7:122615477-122615418	Sox6	Mus musculus SRY-box containing gene 6 (Sox6), transcript variant 1, mRNA [NM_011445]	GO:0051216|GO:0006350|GO:0046982|GO:0030097|GO:0048709|GO:0045449|GO:0045892|GO:0005667|GO:0005634|GO:0010843|GO:0003677|GO:0016458|GO:0045165|GO:0048708|GO:0005515|GO:0003700|GO:0021778|GO:0007275|GO:0001701|GO:0000902|GO:0045944|GO:0042692|GO:0006355|GO:0009791|GO:0043565|GO:0035051|GO:0045893|GO:0048821|GO:0000122	NM_011445	Mm.323365	20679	ENSMUST00000072804	TC1600084
A_52_P460767	0.00280158	1.87763	down	876.732	1659.17	3.52697	4.43588	573.243	1003.75	845.747	795.519	611.962	1430.17	1709.27	1660.23	1608.02	2.88996	3.75065	3.585	3.62149	3.48713	3.8276	4.51735	4.42115	4.36915	NM_010232	chr3:97456171-97456230	Fmo5	Mus musculus flavin containing monooxygenase 5 (Fmo5), transcript variant 3, mRNA [NM_010232]	GO:0005792|GO:0016020|GO:0031227|GO:0050661|GO:0016491|GO:0004497|GO:0004499|GO:0016021|GO:0005783|GO:0055114|GO:0050660	NM_010232	Mm.385180	14263	ENSMUST00000029729	TC1586234
A_52_P347176	0.00013222	3.30206	down	55.2993	184.151	-0.464499	1.25887	39.1231	56.6145	39.4396	50.1672	48.9896	97.4619	170.091	174.211	208.153	-0.983095	-0.39743	-0.83751	-0.365586	-0.155764	-0.0476074	1.18835	1.16867	1.41958	NM_001001985	chr5:34345630-34345689	Nat8l	Mus musculus N-acetyltransferase 8-like (Nat8l), mRNA [NM_001001985]	GO:0016020|GO:0008150|GO:0003674|GO:0008415|GO:0008152|GO:0016740|GO:0016021|GO:0005575|GO:0008080	NM_001001985	Mm.274610	269642	ENSMUST00000056355	TC1577499
A_51_P306919	0.00268079	1.88852	down	152.268	298.476	1.04351	1.96076	166.841	212.389	145.739	137.473	112.547	138.617	298.791	286.192	310.446	1.10929	1.51004	1.04817	1.08875	1.04422	0.460582	2.00118	1.88482	1.99628	NM_007490	chr7:108703189-108703130	Art2a	Mus musculus ADP-ribosyltransferase 2a (Art2a), mRNA [NM_007490]	GO:0016757|GO:0006471|GO:0016020|GO:0005886|GO:0016740|GO:0051789|GO:0003956|GO:0031225	NM_007490	Mm.439746	11871	ENSMUST00000132489	TC1600542
A_52_P390625	0.0350045	1.54086	down	578.838	917.562	2.95688	3.58061	784.916	693.122	647.369	467.627	401.714	478.279	884.468	899.647	968.571	3.34335	3.21644	3.19936	2.85496	2.87986	2.24734	3.56685	3.53719	3.6378	NM_026572	chr8:119513089-119513030	Gcsh	Mus musculus glycine cleavage system protein H (aminomethyl carrier) (Gcsh), nuclear gene encoding mitochondrial protein, mRNA [NM_026572]	GO:0031405|GO:0019464|GO:0005739|GO:0004047|GO:0006546|GO:0005960	NM_026572	Mm.258462	68133	ENSMUST00000040484	TC1776719
A_52_P492532	0.000124641	2.14472	down	514.806	1165.88	2.82383	3.92462	585.193	493.413	531.836	514.482	437.507	526.404	1082.86	1158.42	1256.36	2.91973	2.72612	2.91576	2.99272	3.003	2.38565	3.85882	3.90192	4.01311	AF025535	chr6:69526194-69526135		Mus musculus single chain Fv antibody (E4(Fv)) mRNA, partial cds. [AF025535]			Mm.333130		ENSMUST00000103357	NP1258183
A_51_P213940	0.000110246	1.68393	down	2175.59	3860.69	4.89247	5.6443	2423.9	2063.05	2279.88	1967.25	1666.16	2653.31	3225.37	4157.71	4199	4.97007	4.79003	5.01566	4.92771	4.93215	4.7192	5.43344	5.74555	5.75391	AF058798		Sfn	Mus musculus 14-3-3 protein sigma mRNA, complete cds. [AF058798]	GO:0005634|GO:0005576|GO:0005515|GO:0043616|GO:0051726|GO:0043588|GO:0030307|GO:0005737|GO:0000079|GO:0030216|GO:0019904|GO:0008285		Mm.44482	55948
A_51_P123630	0.000588376	2.0083	down	99.9939	212.766	0.457219	1.4632	108.48	83.4121	93.4852	100.631	97.8122	116.143	187.512	247.62	203.166	0.488245	0.161655	0.407586	0.638666	0.841774	0.205389	1.32903	1.67596	1.3846	L38281	chr14:103455191-103455251	Irg1	Mus musculus immune-responsive gene 1 (Irg1) mRNA, 3' end of cds. [L38281]	GO:0047547|GO:0019543|GO:0032496		Mm.4662	16365
A_52_P263658	0.00229624	1.68213	up	383.721	241.213	2.40179	1.6515	362.604	359.361	370.291	413.635	366.975	429.461	232.736	262.4	228.504	2.22921	2.26876	2.39344	2.67796	2.74937	2.09201	1.64074	1.7596	1.55416	NM_008236	chr4:151536406-151536465	Hes2	Mus musculus hairy and enhancer of split 2 (Drosophila) (Hes2), mRNA [NM_008236]	GO:0030528|GO:0005634|GO:0006350|GO:0016481|GO:0003677|GO:0006355|GO:0003690|GO:0045449	NM_008236	Mm.57038	15206	ENSMUST00000030782	TC1590569
A_52_P114691	0.0037574	1.76828	up	1748.52	1035.15	4.57716	3.75481	2209.25	1765.66	1838.24	1763.82	1354.21	1559.93	1030.66	993.009	1081.77	4.8363	4.56546	4.70503	4.77023	4.63307	3.9529	3.78754	3.67964	3.79726	NM_012045	chr4:138306605-138306546	Pla2g2f	Mus musculus phospholipase A2, group IIF (Pla2g2f), mRNA [NM_012045]	GO:0016042|GO:0005576|GO:0016787|GO:0046872|GO:0006644|GO:0004623|GO:0005509	NM_012045	Mm.331989	26971	ENSMUST00000030526	TC1581518
A_52_P467449	0.0231929	4.02587	down	482.29	1635.86	2.39441	4.40371	197.342	183.999	187.332	844.705	609.882	870.48	1354.19	1706.03	1847.35	1.35151	1.30302	1.41038	3.70805	3.48222	3.11129	4.1814	4.4604	4.56933	NM_007440	chr11:70055774-70055715	Alox12	Mus musculus arachidonate 12-lipoxygenase (Alox12), mRNA [NM_007440]	GO:0004052|GO:0010628|GO:0031343|GO:0043066|GO:0030307|GO:0016491|GO:0051789|GO:0019370|GO:0051901|GO:0043065|GO:0005506|GO:0046872|GO:0006916|GO:0005829|GO:0010595|GO:0031342|GO:0005737|GO:0043280|GO:0016702|GO:0045603|GO:0055114|GO:0006691|GO:0008284|GO:0016165	NM_007440	Mm.12286	11684	ENSMUST00000000329	TC1581558
A_51_P452153	0.0347686	1.57302	down	1853.69	2988.75	4.63162	5.28515	2597.47	2215.32	2063.14	1407.53	1323.48	1515.18	2963.38	2935.53	3067.34	5.06985	4.89277	4.87155	4.44469	4.59996	3.9109	5.31122	5.24338	5.30086	NM_027222	chr18:35807246-35807187	2010001M09Rik	Mus musculus RIKEN cDNA 2010001M09 gene (2010001M09Rik), mRNA [NM_027222]	GO:0002642|GO:0034663|GO:0005783	NM_027222	Mm.27252	69816	ENSMUST00000025211	TC1583132
A_52_P27956	0.0314951	3.65833	down	162.028	434.174	0.630684	2.50187	55.4143	267.72	151.79	43.7674	50.0347	403.443	447.573	426.46	428.489	-0.480856	1.84405	1.10685	-0.562475	-0.12531	2.00185	2.58416	2.46025	2.4612	NM_175210	chr1:71289771-71289712	Abca12	Mus musculus ATP-binding cassette, sub-family A (ABC1), member 12 (Abca12), mRNA [NM_175210]	GO:0008150|GO:0003674|GO:0005524|GO:0000166|GO:0005743	NM_175210	Mm.478138	74591		TC1651535
A_52_P447567	0.0163683	1.58857	down	990.495	1641.86	3.74905	4.41677	1251.13	1097.25	1089.46	947.84	712.348	844.939	1478.53	1656.65	1790.39	4.01597	3.87915	3.95031	3.87424	3.70627	3.06833	4.30814	4.41803	4.52414	BC051424	chr3:108258940-108258881		RIKEN cDNA 5330417C22 gene Gene [Source:MGI Symbol;Acc:MGI:1923930] [ENSMUST00000106625]			Mm.316890		ENSMUST00000106625	TC1626192
A_52_P152219	0.0386933	1.56022	down	87.7285	142.356	0.242476	0.884227	87.953	60.5738	68.5463	103.413	92.2523	113.633	121.18	146.844	159.044	0.185618	-0.299908	-0.0400748	0.678021	0.757345	0.173858	0.699196	0.922118	1.03137	NM_173431	chr8:93741492-93741433	Rpgrip1l	Mus musculus Rpgrip1-like (Rpgrip1l), mRNA [NM_173431]	GO:0021670|GO:0001889|GO:0043584|GO:0035116|GO:0042384|GO:0008589|GO:0005932|GO:0035115|GO:0021772|GO:0007368|GO:0021549|GO:0022038|GO:0043010|GO:0005856|GO:0021537|GO:0060039|GO:0001701|GO:0007420|GO:0035108|GO:0005929|GO:0001822|GO:0021532|GO:0035085|GO:0042995|GO:0005737|GO:0042305|GO:0007382|GO:0005813	NM_173431	Mm.324592	244585	ENSMUST00000047783	TC1779721
A_51_P450033	0.000439127	1.6608	down	506.589	886.805	2.79784	3.52972	560.551	475.073	503.643	524.843	411.182	564.242	810.252	914.401	935.761	2.85766	2.67148	2.83718	3.02148	2.91347	2.4858	3.44041	3.56066	3.58808	NM_007659	chr10:68807832-68805423	Cdk1	Mus musculus cyclin-dependent kinase 1 (Cdk1), mRNA [NM_007659]	GO:0004672|GO:0030544|GO:0045471|GO:0030261|GO:0030332|GO:0033160|GO:0007067|GO:0005524|GO:0051301|GO:0000166|GO:0031100|GO:0007095|GO:0006461|GO:0045740|GO:0005634|GO:0004693|GO:0006468|GO:0016301|GO:0010243|GO:0010628|GO:0005515|GO:0035173|GO:0060045|GO:0016740|GO:0007569|GO:0007049|GO:0004674|GO:0008353|GO:0005737|GO:0045931	NM_007659	Mm.281367	12534	ENSMUST00000152448	TC1677866
A_52_P16472	0.00554932	1.54906	down	543.845	891.756	2.90386	3.53525	582.922	540.1	557.243	581.332	457.375	544.1	807.469	873.632	994.167	2.91412	2.85655	2.98308	3.16896	3.06707	2.43335	3.43545	3.49486	3.67543	NM_019643	chr6:148870395-148870336	Fam60a	Mus musculus family with sequence similarity 60, member A (Fam60a), mRNA [NM_019643]	GO:0008150|GO:0003674|GO:0005575	NM_019643	Mm.18637	56306	ENSMUST00000081956	TC1572048
A_51_P103364	0.0204744	2.34128	down	1397.05	3163.42	4.13749	5.36479	2241.15	1834.7	1796.18	892.093	752.626	865.572	3085.41	2979.2	3425.66	4.85698	4.6208	4.67163	3.78679	3.78562	3.10314	5.36943	5.26469	5.46025	XM_917510	chr12:117238298-117238239	LOC435333	PREDICTED: Mus musculus similar to monoclonal antibody heavy chain (LOC435333), mRNA [XM_917510]		XM_917510	Mm.357651	435333	ENSMUST00000103552	NP614310
A_51_P513530	0.0245154	1.80168	down	433.737	801.976	2.53186	3.38121	334.157	302.07	341.315	565.767	472.565	586.548	705.592	814.569	885.767	2.11134	2.01821	2.27588	3.12981	3.1142	2.54173	3.24088	3.39387	3.50887	NM_017407	chr11:78135655-78135714	Spag5	Mus musculus sperm associated antigen 5 (Spag5), mRNA [NM_017407]	GO:0005819|GO:0008017|GO:0007067|GO:0005876|GO:0005874|GO:0005856|GO:0005737|GO:0051301|GO:0007049|GO:0000776	NM_017407	Mm.24250	54141	ENSMUST00000045026	TC1576510
A_52_P648824	0.00169455	2.65923	down	211.228	590.882	1.49603	2.90704	289.696	252.23	241.623	171.403	137.052	175.362	410.126	649.318	713.201	1.90535	1.75807	1.77754	1.40699	1.32842	0.799818	2.45811	3.06676	3.19625	X12388	chr12:116152844-116152785		Mouse hybridoma 10B10S mRNA for IgM(b) heavy chain variable region V(H)-J(H)2. [X12388]			Mm.430747			NP054345
A_52_P15405	0.0221601	1.52929	down	91.0827	144.798	0.303959	0.916818	118.858	104.22	98.8322	70.3037	73.8248	80.4577	137.125	146.187	151.082	0.620047	0.482959	0.487829	0.12127	0.435866	-0.324216	0.877535	0.915648	0.95727	NM_007549	chr14:63998470-63997333	Blk	Mus musculus B lymphoid kinase (Blk), mRNA [NM_007549]	GO:0004672|GO:0005515|GO:0004713|GO:0004715|GO:0005524|GO:0016740|GO:0016301|GO:0006468|GO:0000166	NM_007549	Mm.3962	12143	ENSMUST00000014597	TC1579306
A_51_P421790	0.0332018	1.7335	down	4075.72	7065.92	5.73059	6.52428	5882.41	4922.75	5133.62	2950.03	2180.11	3385.41	7532.17	6532.72	7132.89	6.24915	6.04472	6.18668	5.51226	5.32002	5.07074	6.65703	6.39745	6.51835	NM_013891	chr17:27851709-27851650	Spdef	Mus musculus SAM pointed domain containing ets transcription factor (Spdef), mRNA [NM_013891]	GO:0005634|GO:0043565|GO:0003700|GO:0006350|GO:0003677|GO:0006355|GO:0045449	NM_013891	Mm.26768	30051	ENSMUST00000025054	NP045646
A_51_P120093	0.0454053	1.51086	down	643.558	1013.35	3.11995	3.71532	551.582	520.639	488.886	796.005	663.769	840.47	857.158	1129.49	1053.4	2.83439	2.80361	2.79427	3.62237	3.60437	3.06068	3.5216	3.86544	3.75892	NM_028035	chr6:51540112-51540171	Snx10	Mus musculus sorting nexin 10 (Snx10), transcript variant 1, mRNA [NM_028035]	GO:0005515|GO:0008150|GO:0003674|GO:0015031|GO:0035091|GO:0007154|GO:0005575|GO:0006810	NM_028035	Mm.476868	71982	ENSMUST00000049152	TC1572566
A_51_P212782	0.000214001	2.54899	down	267.814	721.722	1.87461	3.22453	345.83	252.08	260.257	263.036	231.443	254.237	602.689	759.081	803.397	2.16088	1.75721	1.88471	2.02486	2.08434	1.33566	3.01346	3.29209	3.36805	NM_008361	chr2:129190406-129190347	Il1b	Mus musculus interleukin 1 beta (Il1b), mRNA [NM_008361]	GO:0007568|GO:0050900|GO:0030593|GO:0006954|GO:0043507|GO:0030141|GO:0008083|GO:0005149|GO:0007204|GO:0001525|GO:0045080|GO:0032755|GO:0033198|GO:0014050|GO:0070374|GO:0005576|GO:0006955|GO:0001660|GO:0005125|GO:0007613|GO:0005615|GO:0051781|GO:0032874|GO:0035176|GO:0042221|GO:0010552|GO:0043065|GO:0043123|GO:0046330|GO:0031982|GO:0032496|GO:0045410	NM_008361	Mm.222830	16176	ENSMUST00000028881	TC1585020
A_51_P128987	0.0216918	1.50305	down	8365.73	12901	6.8066	7.39449	10688.8	9782.41	9914.02	5981.88	5508.85	8318.38	13461.4	12428.7	12812.8	7.11077	7.03544	7.13617	6.53212	6.65737	6.36771	7.49473	7.32537	7.36338	NM_008012	chr6:34318338-34318397	Akr1b8	Mus musculus aldo-keto reductase family 1, member B8 (Akr1b8), mRNA [NM_008012]	GO:0005737|GO:0016491|GO:0004032|GO:0055114	NM_008012	Mm.5378	14187	ENSMUST00000038406	TC1578631
A_51_P332355	0.00680931	1.79416	down	113.177	213.479	0.626496	1.46981	107.362	89.2909	97.3613	137.434	114.527	133.087	183.211	220.713	236.513	0.473294	0.259912	0.466196	1.08834	1.06938	0.401856	1.29555	1.51001	1.60386	NM_139303	chr2:109181416-109181475	Kif18a	Mus musculus kinesin family member 18A (Kif18a), mRNA [NM_139303]	GO:0005634|GO:0042995|GO:0015031|GO:0005524|GO:0005874|GO:0005856|GO:0005737|GO:0007018|GO:0003774|GO:0000166|GO:0006810|GO:0003777	NM_139303	Mm.274086	228421	ENSMUST00000028527	TC1578370
A_52_P654161	0.000128485	1.5108	down	233.667	369.842	1.67325	2.26856	241.794	225.952	257.483	215.199	175.504	286.07	343.578	371.665	394.284	1.64459	1.59934	1.86925	1.73527	1.68519	1.50585	2.20268	2.26184	2.34117	NM_009546	chr11:88878330-88878389	Trim25	Mus musculus tripartite motif-containing 25 (Trim25), mRNA [NM_009546]	GO:0005515|GO:0046872|GO:0004842|GO:0005737|GO:0008270|GO:0045087|GO:0016874|GO:0009615	NM_009546	Mm.248445	217069	ENSMUST00000107896	TC1583603
A_51_P370561	0.00750253	1.69807	down	809.621	1435.59	3.46308	4.22698	1013.08	864.773	901.153	765.798	620.443	692.479	1395.46	1422.6	1488.69	3.71149	3.53565	3.67655	3.56656	3.50699	2.78125	4.22471	4.1983	4.25792	NM_026551	chr11:102855900-102855841	Dcakd	Mus musculus dephospho-CoA kinase domain containing (Dcakd), mRNA [NM_026551]	GO:0008150|GO:0003674|GO:0015937|GO:0005524|GO:0005739|GO:0000166|GO:0004140	NM_026551	Mm.277449	68087	ENSMUST00000021313	TC1757386
A_52_P259779	0.0183368	2.96731	down	44.469	126.144	-0.881026	0.688128	73.5275	54.9104	66.2578	25.1783	24.6307	22.3092	91.5773	139.394	147.461	-0.0728307	-0.441523	-0.0890622	-1.36015	-1.14778	-2.17481	0.295104	0.847007	0.922271	AF045484	chr12:116396792-116396733		Ig heavy chain V region 23 Precursor [Source:UniProtKB/Swiss-Prot;Acc:P01748] [ENSMUST00000103523]			Mm.335723		ENSMUST00000103523	NP049406
A_51_P346681	0.00143875	2.73279	down	202.595	564.793	1.42444	2.87481	280.426	239.848	254.196	148.074	134.888	158.138	493.859	574.57	625.949	1.85843	1.68545	1.85072	1.19592	1.30545	0.650665	2.72614	2.89032	3.00799	XM_909040	chr12:115962114-115962056				XM_909040	Mm.471359		ENSMUST00000103506	NP061444
A_51_P334308	0.00183901	1.6071	down	2380.15	4028.38	5.03052	5.71498	2495	2158.25	2242.72	2663.75	2044.78	2676.39	3862.39	4239.76	3983	5.01178	4.85512	4.99195	5.36499	5.22756	4.7317	5.69346	5.77375	5.67772	NM_145928	chr14:41720058-41719999	Tspan14	Mus musculus tetraspanin 14 (Tspan14), mRNA [NM_145928]	GO:0016020|GO:0008150|GO:0003674|GO:0016021|GO:0005575	NM_145928	Mm.28876	52588	ENSMUST00000047652	TC1574114
A_51_P391836	0.00131755	1.54673	down	1128.92	1833.28	3.9497	4.57892	1315.33	1088.09	1145.73	1144.13	855.253	1225.02	1894.68	1721.5	1883.67	4.08816	3.86706	4.02297	4.14577	3.97004	3.60421	4.66592	4.47343	4.59741	XM_903421	chr12:114974424-114974365		Ig heavy chain V region 914 [Source:UniProtKB/Swiss-Prot;Acc:P18527] [ENSMUST00000103448]		XM_903421	Mm.342177		ENSMUST00000103452	NP048004
A_51_P265660	0.00085024	1.72843	down	130.754	238.849	0.840105	1.62956	145.69	114.645	121.933	141.207	107.983	153.067	201	246.983	268.563	0.913711	0.620497	0.790867	1.12741	0.984494	0.603648	1.42924	1.67225	1.7872	NM_008017	chr4:52500075-52500134	Smc2	Mus musculus structural maintenance of chromosomes 2 (Smc2), mRNA [NM_008017]	GO:0005515|GO:0030261|GO:0008150|GO:0007067|GO:0005524|GO:0051276|GO:0000166|GO:0005694|GO:0007049|GO:0051301|GO:0005634|GO:0005737|GO:0005575	NM_008017	Mm.2999	14211	ENSMUST00000102915	TC1573075
A_51_P254811	0.0168158	1.54909	down	573.322	927.978	2.96515	3.59657	531.817	450.42	504.952	696.939	551.974	703.832	874.733	932.796	976.406	2.78174	2.5946	2.84092	3.43063	3.33829	2.80471	3.55088	3.5894	3.64942	NM_008446	chrX:97922126-97922185	Kif4	Mus musculus kinesin family member 4 (Kif4), mRNA [NM_008446]	GO:0005634|GO:0005524|GO:0003677|GO:0005874|GO:0007018|GO:0003774|GO:0000166|GO:0003777	NM_008446	Mm.383091	16571	ENSMUST00000048962	TC1576875
A_52_P373846	0.0589208	1.53418	down	112.99	176.67	0.578576	1.19605	154.291	125.786	150.334	79.6102	71.6098	96.3071	150.147	184.923	194.94	0.996469	0.754297	1.09295	0.300624	0.391918	-0.0648046	1.00842	1.25476	1.32497	NM_172716	chr5:108931091-108931150	Pcgf3	Mus musculus polycomb group ring finger 3 (Pcgf3), mRNA [NM_172716]	GO:0005515|GO:0046872|GO:0008150|GO:0006350|GO:0003674|GO:0008270|GO:0005575|GO:0045449	NM_172716	Mm.261218	69587	ENSMUST00000046975	TC1601651
A_52_P550932	0.0113372	1.66775	down	456.207	802.509	2.62826	3.36617	578.118	494.911	526.254	397.892	322.418	417.651	619.093	843.148	945.285	2.90218	2.73049	2.90053	2.62197	2.56262	2.05178	3.0522	3.44362	3.60269	NM_008197	chr15:78859930-78859989	H1f0	Mus musculus H1 histone family, member 0 (H1f0), mRNA [NM_008197]	GO:0005634|GO:0003677|GO:0000786|GO:0005694|GO:0006334	NM_008197	Mm.24350	14958		TC1633848
A_51_P310100	0.00675393	1.76973	down	68.8552	128.267	-0.0812183	0.742314	66.3314	59.8384	61.9218	82.3538	71.1544	71.5314	122.668	129.445	132.686	-0.221424	-0.317531	-0.186705	0.349506	0.382714	-0.49387	0.716806	0.740178	0.769957	AK029149	chr17:7214867-7214926	Rnaset2b	Mus musculus 10 days neonate skin cDNA, RIKEN full-length enriched library, clone:4732497K21 product:weakly similar to RIBONUCLEASE 6 PRECURSOR [Homo sapiens], full insert sequence. [AK029149]	GO:0008150|GO:0003674|GO:0005575		Mm.181237	68195		TC1588360
A_52_P652059	0.0153104	3.92468	down	2499.2	7814.28	4.69919	6.67176	654.181	3779.15	2064.45	1245.78	1142.57	6109.04	7632.34	7960.29	7850.22	3.0805	5.66332	4.87246	4.26858	4.3879	5.92236	6.6761	6.68258	6.6566	NM_028191	chr19:39168290-39168349	Cyp2c65	Mus musculus cytochrome P450, family 2, subfamily c, polypeptide 65 (Cyp2c65), mRNA [NM_028191]	GO:0046872|GO:0008150|GO:0003674|GO:0016491|GO:0004497|GO:0005575|GO:0055114	NM_028191	Mm.271190	72303	ENSMUST00000087236	TC1599365
A_51_P135092	0.0332033	1.59199	down	226.02	374.298	1.6122	2.28304	169.694	250.809	166.299	279.339	225.433	264.542	332.059	385.534	405.302	1.13375	1.74992	1.23855	2.11162	2.04639	1.39298	2.15348	2.31469	2.38094	NM_134471	chr4:116832834-116832775	Kif2c	Mus musculus kinesin family member 2C (Kif2c), mRNA [NM_134471]	GO:0007059|GO:0007067|GO:0005524|GO:0005874|GO:0051301|GO:0000166|GO:0005694|GO:0007049|GO:0003777|GO:0005634|GO:0000775|GO:0005737|GO:0005856|GO:0007018|GO:0003774|GO:0000776	NM_134471	Mm.247651	73804	ENSMUST00000106436	TC1574955
A_52_P193657	0.0152522	1.69566	down	28.8711	50.6666	-1.36043	-0.598578	40.2284	29.6522	33.1184	25.0385	21.6055	23.5835	48.4297	54.0359	49.5341	-0.942899	-1.33046	-1.08952	-1.36818	-1.33684	-2.09467	-0.623993	-0.520174	-0.651567	NM_175026	chr1:175571341-175572642	Pyhin1	Mus musculus pyrin and HIN domain family, member 1 (Pyhin1), mRNA [NM_175026]	GO:0005634|GO:0005515|GO:0008150|GO:0003674|GO:0005575	NM_175026	Mm.447	236312	ENSMUST00000056071	TC1579139
A_52_P499499	9.60301e-06	2.20246	down	66.9248	154.524	-0.127834	1.01128	69.6769	58.7237	66.3691	69.388	54.0228	83.368	155.173	149.331	159.068	-0.150434	-0.344658	-0.0866413	0.102355	-0.0146713	-0.272952	1.05592	0.946346	1.03158	NM_029021	chr2:165221118-165221059	4833422F24Rik	Mus musculus RIKEN cDNA 4833422F24 gene (4833422F24Rik), mRNA [NM_029021]	GO:0016020|GO:0008150|GO:0003674|GO:0016021|GO:0005575	NM_029021	Mm.72179	74614	ENSMUST00000029213	TC1587370
A_52_P681495	0.0160502	1.5962	down	102.568	171.822	0.487304	1.16195	95.8444	80.7112	91.5995	116.306	109.452	121.496	157.372	183.342	174.751	0.309578	0.114166	0.378187	0.847519	1.00398	0.270393	1.07622	1.24238	1.16724	NM_027930	chr10:20080631-20080690	Fam54a	Mus musculus family with sequence similarity 54, member A (Fam54a), mRNA [NM_027930]	GO:0008150|GO:0003674|GO:0005575	NM_027930	Mm.262151	71804		TC1583437
A_52_P374653	2.82169e-05	3.88963	down	532.332	2155.48	2.85113	4.81077	655.838	624.385	602.977	456.314	386.955	467.524	2016.2	2098.19	2352.05	3.08415	3.06576	3.09688	2.81963	2.82586	2.21452	4.75561	4.75891	4.91778	X67625	chr6:70523153-70523212		Ig kappa chain V-III region MOPC 63 Precursor [Source:UniProtKB/Swiss-Prot;Acc:P01661] [ENSMUST00000103397]			Mm.333124		ENSMUST00000103397	NP061619
A_51_P354681	0.0192869	1.71486	down	2815.82	4859.13	5.20337	5.98146	3509.92	3752.2	3434.31	1809.94	1560.47	2828.09	4309.34	5007.87	5260.19	5.50418	5.65299	5.60672	4.80747	4.8376	4.81124	5.85144	6.01396	6.07898	NM_026243	chr10:101851960-101852019	Mgat4c	Mus musculus mannosyl (alpha-1,3-)-glycoprotein beta-1,4-N-acetylglucosaminyltransferase, isozyme C (putative) (Mgat4c), transcript variant 2, mRNA [NM_026243]	GO:0016757|GO:0046872|GO:0016020|GO:0008150|GO:0003674|GO:0016740|GO:0005975|GO:0008454|GO:0016758|GO:0016021|GO:0005575|GO:0005794	NM_026243	Mm.25252	67569	ENSMUST00000120748	TC1585825
A_52_P372062	0.000392444	1.86682	up	766.208	433.225	3.39656	2.49598	848.591	695.419	762.539	811.602	652.444	826.653	408.406	473.4	417.868	3.45588	3.22121	3.43559	3.65037	3.57954	3.03676	2.45205	2.6109	2.42499	NR_003552	chr15:82467277-82467218	Cyp2d13	Mus musculus cytochrome P450, family 2, subfamily d, polypeptide 13 (Cyp2d13), non-coding RNA [NR_003552]	GO:0008150|GO:0003674|GO:0005575	NR_003552	Mm.443212	68444	ENSMUST00000014525	TC1588115
A_51_P176998	0.0620018	1.50648	up	53.1297	37.3432	-0.470071	-1.06125	44.7289	45.4663	42.459	55.6098	64.4368	66.0776	28.5765	44.5343	38.9186	-0.789909	-0.713805	-0.731082	-0.216991	0.239645	-0.608285	-1.38506	-0.799174	-0.999526	AK087820	chr4:142769237-142760052		PR domain containing 2, with ZNF domain Gene [Source:MGI Symbol;Acc:MGI:107628] [ENSMUST00000134791]			Mm.332020		ENSMUST00000134791	TC1624557
A_51_P185229	0.0693597	1.86516	up	781.273	402.164	3.29003	2.39073	1208.13	1031.91	1072.04	498.153	388.754	488.647	382.336	406.093	418.062	3.96552	3.79057	3.92706	2.94619	2.83255	2.27828	2.35688	2.38965	2.42566	NM_007553	chr2:133386981-133387040	Bmp2	Mus musculus bone morphogenetic protein 2 (Bmp2), mRNA [NM_007553]	GO:0051216|GO:0001503|GO:0006954|GO:0019211|GO:0045597|GO:0045669|GO:0070700|GO:0001658|GO:0008285|GO:0045778|GO:0001837|GO:0030509|GO:0007275|GO:0001649|GO:0043234|GO:0030282|GO:0050769|GO:0010552|GO:0042482|GO:0043065|GO:0005737|GO:0005102|GO:0040007|GO:0046982|GO:0009887|GO:0031988|GO:0030154|GO:0048711|GO:0045666|GO:0008083|GO:0019904|GO:0001934|GO:0071363|GO:0004745|GO:0021537|GO:0010922|GO:…	NM_007553	Mm.103205	12156	ENSMUST00000028836	TC1585369
A_51_P302520	0.0161964	1.85425	up	551.316	314.857	2.89454	2.0037	453.449	539.456	380.142	560.545	625.857	748.444	411.263	289.579	243.728	2.55175	2.85483	2.43131	3.11643	3.51952	2.89338	2.4621	1.90179	1.64721	NM_010867	chr17:71475839-71475898	Myom1	Mus musculus myomesin 1 (Myom1), transcript variant 1, mRNA [NM_010867]	GO:0032982|GO:0005200|GO:0005856|GO:0031430|GO:0030017|GO:0006936	NM_010867	Mm.4103	17929	ENSMUST00000073211	TC1584773
A_52_P772950	5.69157e-05	2.04805	down	47.3618	100.516	-0.642992	0.391259	43.5092	38.5913	49.0466	43.3848	40.0725	69.5663	100.238	102.126	99.184	-0.829796	-0.950327	-0.522998	-0.575141	-0.445629	-0.534058	0.425474	0.398182	0.35012	NM_026415	chr2:25094538-25094479	2310002J15Rik	Mus musculus RIKEN cDNA 2310002J15 gene (2310002J15Rik), mRNA [NM_026415]	GO:0008150|GO:0003674|GO:0005575	NM_026415	Mm.46431	67859	ENSMUST00000043379	TC1584189
A_51_P130015	0.00645099	1.85607	down	790.57	1528.23	3.42003	4.31228	736.449	574.272	682.16	1006.53	760.12	983.892	1354.32	1559.16	1671.21	3.2514	2.94506	3.27489	3.96091	3.79992	3.28798	4.18154	4.33054	4.42476	NM_007900	chr3:26996369-26996310	Ect2	Mus musculus ect2 oncogene (Ect2), transcript variant 1, mRNA [NM_007900]	GO:0005515|GO:0005089|GO:0005085|GO:0000902|GO:0035023|GO:0017048|GO:0005622	NM_007900	Mm.261453	13605	ENSMUST00000029248	TC1575723
A_52_P508221	0.0266609	1.68035	down	28.54	49.2768	-1.39728	-0.648527	37.1556	32.7851	36.3758	17.7238	21.0705	26.1291	54.4436	52.5419	40.8449	-1.05754	-1.18556	-0.954175	-1.86664	-1.37301	-1.94679	-0.455124	-0.560623	-0.929833	NM_001162932	chr16:10839982-10840041	A630055G03Rik	Mus musculus RIKEN cDNA A630055G03 gene (A630055G03Rik), mRNA [NM_001162932]	GO:0005634|GO:0008150|GO:0003674|GO:0003677|GO:0006260|GO:0005575	NM_001162932	Mm.325777	223970	ENSMUST00000100183
A_51_P237924	0.00124195	1.6445	up	85.3954	54.7517	0.230189	-0.487456	89.2637	79.4204	77.8349	94.4399	74.4289	96.9849	50.414	56.3929	57.4482	0.206958	0.0909071	0.143264	0.547067	0.447623	-0.0546856	-0.566063	-0.458579	-0.437727	NM_201353	chr18:61155529-61155470	Slc6a7	Mus musculus solute carrier family 6 (neurotransmitter transporter, L-proline), member 7 (Slc6a7), mRNA [NM_201353]	GO:0015293|GO:0005887|GO:0016020|GO:0006836|GO:0015824|GO:0006865|GO:0016021|GO:0006810|GO:0005328|GO:0015193	NM_201353	Mm.39846	240332	ENSMUST00000025520	NP661029
A_52_P502849	1.09869e-06	3.66081	down	639.277	2467.03	3.13141	5.00357	728.28	664.414	568.967	647.309	517.047	709.643	2225.23	2444.46	2731.4	3.23531	3.15541	3.01312	3.32405	3.24398	2.81657	4.89792	4.97928	5.13351	BC108385	chr6:70622214-70622273		Mus musculus immunoglobulin kappa chain variable 21 (V21)-4, mRNA (cDNA clone IMAGE:4989625). [BC108385]			Mm.333124		ENSMUST00000103401	NP059707
A_51_P133992	0.0175663	1.67251	up	8755.92	5364.56	6.87124	6.12923	11314.5	10424.7	10757	6851.57	5751.88	7435.88	5452.23	5329.73	5311.71	7.19284	7.12719	7.25391	6.72796	6.71965	6.20591	6.19082	6.10383	6.09305	NM_001099917	chr10:80857614-80857673	2210404O07Rik	Mus musculus RIKEN cDNA 2210404O07 gene (2210404O07Rik), mRNA [NM_001099917]	GO:0016020|GO:0008150|GO:0003674|GO:0016021|GO:0005575	NM_001099917	Mm.253147	72273	ENSMUST00000118206	TC1648876
A_51_P367866	0.00137246	2.0847	down	728.881	1597.18	3.31534	4.37519	719.388	566.695	642.267	849.92	729.725	865.293	1392.66	1696.99	1701.89	3.21758	2.9259	3.18795	3.71693	3.74104	3.10267	4.22181	4.45274	4.45101	NM_007913	chr18:35024395-35024454	Egr1	Mus musculus early growth response 1 (Egr1), mRNA [NM_007913]	GO:0048169|GO:0006350|GO:0030217|GO:0032868|GO:0045449|GO:0005634|GO:0046872|GO:0003677|GO:0008270|GO:0005622|GO:0003676|GO:0003700|GO:0030509|GO:0045944|GO:0051789|GO:0006355|GO:0003690|GO:0016563|GO:0007611|GO:0043565|GO:0071445|GO:0045893|GO:0045941|GO:0009749|GO:0000122	NM_007913	Mm.181959	13653	ENSMUST00000064795	TC1730587
A_51_P290576	0.0729468	1.68319	down	563.994	960.976	2.88801	3.6392	464.125	349.737	382.711	802.481	639.126	745.783	818.162	990.228	1074.54	2.58533	2.2296	2.44103	3.63407	3.54979	2.88824	3.45443	3.6756	3.78758	NM_152804	chr13:111190915-111190974	Plk2	Mus musculus polo-like kinase 2 (Drosophila) (Plk2), mRNA [NM_152804]	GO:0004672|GO:0000278|GO:0005515|GO:0004674|GO:0005524|GO:0016740|GO:0016301|GO:0006468|GO:0000166|GO:0042801	NM_152804	Mm.380	20620	ENSMUST00000022212	TC1675083
A_52_P258606	0.0167495	2.8736	up	1250.02	402.045	3.91404	2.39118	2119.64	1680.92	1741.63	677.255	558.006	722.643	395.767	408.006	402.361	4.77656	4.4945	4.62714	3.3893	3.35397	2.84276	2.40669	2.39643	2.37043	AK081980	chr1:163179151-163179092	Prdx6	Mus musculus 16 days embryo head cDNA, RIKEN full-length enriched library, clone:C130091B17 product:peroxiredoxin 5, related sequence 3, full insert sequence. [AK081980]	GO:0004601|GO:0042744|GO:0005739|GO:0016491|GO:0003824|GO:0005764|GO:0016042|GO:0016787|GO:0005829|GO:0004602|GO:0005737|GO:0045454|GO:0051920|GO:0016209|GO:0032060|GO:0055114|GO:0000302		Mm.186185	11758		TC1597770
A_52_P532456	0.0350245	2.08756	down	579.665	1180.4	2.87703	3.93885	345.114	430.883	314.563	722.775	686.351	978.302	1028.39	1248.27	1264.55	2.15789	2.53062	2.15813	3.48314	3.65264	3.27976	3.78435	4.0097	4.02249	NM_009538	chr10:12851280-12851339	Plagl1	Mus musculus pleiomorphic adenoma gene-like 1 (Plagl1), mRNA [NM_009538]	GO:0005515|GO:0003677|GO:0045944	NM_009538	Mm.287857	22634	ENSMUST00000121646
A_52_P139588	0.00392945	1.53731	down	864.014	1395.68	3.56134	4.18174	909.032	719.128	757.681	928.062	779.962	1090.22	1233.46	1480.93	1472.65	3.55514	3.26957	3.42637	3.84382	3.83709	3.43603	4.04668	4.25626	4.24228	NM_001039644	chr1:153668950-153669009	Edem3	Mus musculus ER degradation enhancer, mannosidase alpha-like 3 (Edem3), mRNA [NM_001039644]	GO:0004571|GO:0006516|GO:0005788|GO:0016020|GO:0043161|GO:0004569|GO:0006986|GO:0005783|GO:0005509	NM_001039644	Mm.337691	66967	ENSMUST00000059498	TC1638081
A_52_P297765	0.0610233	2.54186	down	324.083	737.08	1.90969	3.25557	157.936	156.977	135.766	544.302	414.587	534.932	617.494	786.943	806.802	1.03015	1.07388	0.945893	3.07401	2.92536	2.40884	3.04847	3.34409	3.37415	NM_001081120	chr8:127264436-127264377	Fam89a	Mus musculus family with sequence similarity 89, member A (Fam89a), mRNA [NM_001081120]	GO:0008150|GO:0003674|GO:0005575	NM_001081120	Mm.271600	69627	ENSMUST00000055257	TC1600574
A_52_P16931	0.00161608	1.6834	down	29.798	53.1905	-1.29386	-0.542482	33.3584	25.0667	30.8113	30.2755	24.5228	34.753	42.6127	57.265	59.6938	-1.21306	-1.57283	-1.19369	-1.09418	-1.15411	-1.53531	-0.808603	-0.436439	-0.382406	NM_022724	chr2:3375653-3375594	Suv39h2	Mus musculus suppressor of variegation 3-9 homolog 2 (Drosophila) (Suv39h2), transcript variant 1, mRNA [NM_022724]	GO:0005515|GO:0006350|GO:0005720|GO:0030154|GO:0016740|GO:0006333|GO:0008276|GO:0008168|GO:0005694|GO:0007049|GO:0045449|GO:0051567|GO:0005634|GO:0000775|GO:0016568|GO:0000785|GO:0003682|GO:0008270|GO:0018024|GO:0007140	NM_022724	Mm.128273	64707	ENSMUST00000115062	TC1604134
A_52_P377791	0.00490481	1.60749	down	2427.93	4102.04	5.0557	5.74052	2505.78	2094.94	2134.9	2852.07	2200.77	2779.12	3831.34	4294.3	4180.48	5.018	4.81216	4.92087	5.46353	5.33363	4.78604	5.68182	5.79219	5.74754	NM_008557	chr7:31857214-31856365	Fxyd3	Mus musculus FXYD domain-containing ion transport regulator 3 (Fxyd3), mRNA [NM_008557]	GO:0034707|GO:0016020|GO:0006811|GO:0005254|GO:0005216|GO:0016021|GO:0006810	NM_008557	Mm.263847	17178	ENSMUST00000072331	TC1734556
A_51_P299400	0.0135132	2.00751	down	36.1603	74.473	-1.05801	-0.0526021	48.372	44.5699	44.9508	25.5169	26.9987	26.5532	62.4971	76.1199	84.8019	-0.676943	-0.742531	-0.648806	-1.34088	-1.01535	-1.92356	-0.256096	-0.0258193	0.124109	XM_001474896	chr13_random:160622-160563	6720475J19Rik	PREDICTED: Mus musculus RIKEN cDNA 6720475J19 gene (6720475J19Rik), mRNA [XM_001474896]	GO:0008150|GO:0003674|GO:0005575	XM_001474896	Mm.273536	68157		TC1608373
A_51_P467086	1.66088e-05	7.85057	down	1916.3	15433.7	4.67944	7.65224	1766.04	1328.03	1396.86	2616.23	1972.29	2418.34	15430.3	14534.1	16336.6	4.51326	4.15454	4.30889	5.33902	5.17549	4.58543	7.69167	7.55113	7.7139	NM_007850	chr8:22427232-22427291	Defa3	Mus musculus defensin, alpha, 3 (Defa3), mRNA [NM_007850]	GO:0006952|GO:0005576|GO:0005615|GO:0042742	NM_007850	Mm.436573	13237	ENSMUST00000079528
A_51_P390038	0.0141119	1.69964	up	100.609	61.8177	0.442117	-0.323115	98.8658	82.0151	71.795	103.118	108.749	139.113	73.425	58.664	53.3643	0.354356	0.137288	0.0267296	0.673895	0.994697	0.465739	-0.0236154	-0.401618	-0.544113	NM_177834	chr1:10315005-10314946	Cpa6	Mus musculus carboxypeptidase A6 (Cpa6), mRNA [NM_177834]	GO:0006508|GO:0004180|GO:0005576|GO:0016787|GO:0046872|GO:0008150|GO:0003674|GO:0004181|GO:0008270|GO:0008233|GO:0008237|GO:0005575	NM_177834	Mm.336423	329093	ENSMUST00000035577	TC1596560
A_52_P459818	0.0614233	1.60499	down	210	347.466	1.42785	2.11041	241.802	241.975	223.03	128.044	101.186	323.964	208.553	408.754	425.09	1.64464	1.69818	1.66202	0.986233	0.890704	1.68532	1.48246	2.39907	2.44971	NM_001012306	chr3:98546343-98546284	Hsd3b3	Mus musculus hydroxy-delta-5-steroid dehydrogenase, 3 beta- and steroid delta-isomerase 3 (Hsd3b3), transcript variant 5, mRNA [NM_001012306]	GO:0006694|GO:0005488|GO:0005739|GO:0016853|GO:0016491|GO:0003824|GO:0005743|GO:0016020|GO:0008152|GO:0004769|GO:0016021|GO:0003854|GO:0005783|GO:0055114	NM_001012306	Mm.158717	15494	ENSMUST00000135706	TC1643582
A_51_P267278	1.9446e-05	2.89542	up	282.766	103.241	1.95158	0.417807	290.352	231.549	276.564	297.836	247.667	352.626	85.8702	106.243	117.61	1.90862	1.63465	1.97239	2.20412	2.18209	1.80762	0.202271	0.455202	0.595947	NM_021301	chr16:36750662-36750603	Slc15a2	Mus musculus solute carrier family 15 (H+/peptide transporter), member 2 (Slc15a2), transcript variant 1, mRNA [NM_021301]	GO:0042938|GO:0005215|GO:0042895|GO:0015031|GO:0042891|GO:0042936|GO:0006810|GO:0015198|GO:0015334|GO:0005887|GO:0015293|GO:0015833|GO:0016020|GO:0005624|GO:0006857|GO:0016021	NM_021301	Mm.281804	57738	ENSMUST00000023616	TC1580860
A_51_P230873	0.000315621	1.65399	down	302.413	528.677	2.0557	2.78165	322.767	293.134	296.77	303.606	254.562	343.639	469.726	558.566	557.74	2.06131	1.97489	2.07412	2.2318	2.2217	1.77038	2.65386	2.84956	2.84153	NM_019499	chr6:66488986-66489045	Mad2l1	Mus musculus MAD2 mitotic arrest deficient-like 1 (yeast) (Mad2l1), mRNA [NM_019499]	GO:0005816|GO:0005634|GO:0003674|GO:0000775|GO:0007067|GO:0007094|GO:0005737|GO:0051301|GO:0007049|GO:0000776|GO:0045841|GO:0000070	NM_019499	Mm.476807	56150	ENSMUST00000079549	TC1694404
A_52_P585071	0.00109995	1.53234	down	94.8358	153.714	0.379918	0.995653	100.4	100.28	95.8379	93.385	74.1013	105.01	132.116	156.915	172.112	0.376568	0.427362	0.443443	0.530861	0.44126	0.0600157	0.823851	1.01782	1.14529	NM_152822	chrX:93136235-93136176	Las1l	Mus musculus LAS1-like (S. cerevisiae) (Las1l), mRNA [NM_152822]	GO:0005634|GO:0008150|GO:0003674|GO:0005575	NM_152822	Mm.274318	76130	ENSMUST00000113864	TC1581858
A_51_P364714	0.0422802	1.52158	down	165.404	260.917	1.149	1.75457	232.146	182.159	185.437	144.102	108.531	140.05	215.467	269.245	298.039	1.58585	1.28852	1.39571	1.15669	0.991802	0.475426	1.52951	1.79676	1.93744	NM_172203	chrX:130627641-130627582	Nox1	Mus musculus NADPH oxidase 1 (Nox1), mRNA [NM_172203]	GO:0003081|GO:0005515|GO:0005768|GO:0016491|GO:0016175|GO:0007165|GO:0006810|GO:0005506|GO:0042554|GO:0009055|GO:0046872|GO:0016020|GO:0006800|GO:0030198|GO:0005737|GO:0022900|GO:0016021|GO:0055114|GO:0050660|GO:0043020|GO:0000302	NM_172203	Mm.233865	237038	ENSMUST00000113273	TC1598894
A_51_P162326	0.0134374	1.5338	down	1165.93	1855.29	3.97975	4.59686	1055.69	921.978	954.222	1309.24	1122.07	1632.39	1786.83	1856.15	1922.88	3.77093	3.62806	3.7591	4.34026	4.36177	4.0184	4.58137	4.58208	4.62714	XM_001478408	chrX:23738598-23738657	Gm5933	PREDICTED: Mus musculus similar to LOC635138 protein (LOC546271), mRNA [XM_001478408]	GO:0008150|GO:0003674|GO:0005575	XM_001478408	Mm.380163	546271		TC1577869
A_52_P534355	0.0251142	1.60077	up	150.668	99.2823	1.04355	0.364785	173.887	166.336	145.311	117.152	164.804	136.518	92.7296	115.022	90.0956	1.16896	1.15743	1.04391	0.857979	1.59444	0.438568	0.313144	0.569743	0.211468	AK041855	chr14:21290446-21290387	Anxa7	Mus musculus 3 days neonate thymus cDNA, RIKEN full-length enriched library, clone:A630042F09 product:annexin A7, full insert sequence. [AK041855]	GO:0009651|GO:0005515|GO:0014070|GO:0009992|GO:0005886|GO:0005626|GO:0008283|GO:0008360|GO:0006874|GO:0006944|GO:0005509|GO:0005544|GO:0005634|GO:0005635|GO:0005829|GO:0051592|GO:0031982|GO:0007599|GO:0005625			11750		TC1624459
A_51_P191909	0.0289335	1.5792	down	113.392	184.12	0.601504	1.2607	90.0476	85.9085	89.8007	133.726	112.993	167.876	172.468	176.517	203.376	0.219574	0.204198	0.349573	1.04888	1.04992	0.736882	1.20837	1.18764	1.38609	NM_080726	chr14:55098859-55098918	Rem2	Mus musculus rad and gem related GTP binding protein 2 (Rem2), mRNA [NM_080726]	GO:0008134|GO:0016020|GO:0007264|GO:0005886|GO:0005524|GO:0005525|GO:0000166|GO:0007165|GO:0006355|GO:0003924|GO:0005622	NM_080726	Mm.274727	140743	ENSMUST00000022783	TC1581029
A_51_P155445	0.0824401	1.84973	down	255.473	526.392	1.72905	2.61636	151.478	226.526	190.263	287.594	226.756	450.221	227.053	671.691	680.431	0.969924	1.603	1.43277	2.15363	2.05483	2.16012	1.60507	3.11563	3.12839	NM_011076	chr5:8747979-8748038	Abcb1a	Mus musculus ATP-binding cassette, sub-family B (MDR/TAP), member 1A (Abcb1a), mRNA [NM_011076]	GO:0046581|GO:0005886|GO:0008559|GO:0005524|GO:0055085|GO:0016887|GO:0000166|GO:0006810|GO:0042623|GO:0006855|GO:0016787|GO:0016020|GO:0042626|GO:0017111|GO:0016021|GO:0015893	NM_011076	Mm.207354	18671	ENSMUST00000115373	TC1583894
A_52_P332788	0.0182764	1.80437	down	196.332	363.132	1.38825	2.23975	268.369	235.735	234.96	139.534	146.507	152.884	322.831	379.238	387.326	1.79503	1.66049	1.73719	1.11021	1.42466	0.601919	2.11282	2.29094	2.31549	XM_001473420	chr1:85109076-85109017	Gm2397	PREDICTED: Mus musculus similar to SP140 nuclear body protein family member (LOC100039742), mRNA [XM_001473420]	GO:0008150|GO:0003674|GO:0005575	XM_001473420	Mm.441462	100039742		TC1631331
A_51_P164021	0.0267409	1.81154	down	91.5846	171.774	0.286625	1.14384	74.5256	61.739	71.2495	121.771	95.6681	124.555	132.625	192.47	190.226	-0.0533795	-0.27242	0.0157266	0.913765	0.809798	0.306262	0.829396	1.31247	1.28966	NM_173762	chr3:134932050-134933662	Cenpe	Mus musculus centromere protein E (Cenpe), mRNA [NM_173762]	GO:0045842|GO:0007088|GO:0051987|GO:0008608|GO:0007067|GO:0007275|GO:0005524|GO:0050793|GO:0051301|GO:0000166|GO:0007049|GO:0019901|GO:0003777|GO:0051984|GO:0045860|GO:0043515|GO:0000775|GO:0007094|GO:0005737|GO:0005856|GO:0045184|GO:0007018|GO:0003774|GO:0000776	NM_173762	Mm.161470	229841	ENSMUST00000062893	TC1624936
A_51_P433467	0.0041816	1.65552	down	1174.51	2027.16	3.9979	4.72518	1093.01	1077.64	890.554	1249.44	1169.69	1566.74	2006.56	2068.66	2006.27	3.82105	3.85313	3.65948	4.2728	4.42174	3.95917	4.7487	4.73846	4.68838	NM_007965	chr12:109926513-109926572	Evl	Mus musculus Ena-vasodilator stimulated phosphoprotein (Evl), transcript variant 2, mRNA [NM_007965]	GO:0005515|GO:0008154|GO:0051016|GO:0017124|GO:0030048|GO:0030027|GO:0042995|GO:0005522|GO:0005737|GO:0005856|GO:0005925|GO:0007411|GO:0030168|GO:0003779|GO:0045010	NM_007965	Mm.238841	14026	ENSMUST00000077735	TC1589894
A_51_P401451	0.00725175	1.53582	down	112.209	181.74	0.616504	1.23551	131.345	121.814	123.974	101.781	84.8546	109.484	152.822	189.298	203.102	0.764177	0.708012	0.814813	0.655067	0.636753	0.120202	1.03389	1.28849	1.38415	NM_009862	chr16:18794880-18793399	Cdc45	Mus musculus cell division cycle 45 homolog (S. cerevisiae) (Cdc45), transcript variant 1, mRNA [NM_009862]	GO:0005634|GO:0006260|GO:0051301|GO:0007049|GO:0006270	NM_009862	Mm.1248	12544	ENSMUST00000115586	TC1577345
A_52_P448027	0.0663677	1.59567	down	49.0644	84.366	-0.591942	0.0822188	43.4213	37.6035	38.6511	63.4284	51.2608	60.0211	53.7536	98.7657	100.579	-0.832712	-0.987734	-0.866642	-0.0272012	-0.090385	-0.746976	-0.473524	0.349918	0.370262	NM_025495	chr13:49742940-49736630	Cenpp	Mus musculus centromere protein P (Cenpp), mRNA [NM_025495]	GO:0005634|GO:0008150|GO:0003674|GO:0000775|GO:0005694|GO:0005575	NM_025495	Mm.440323	66336	ENSMUST00000021823	TC1593729
A_52_P161454	1.63205e-07	2.3283	down	131.011	318.756	0.832903	2.05218	139.075	124.967	136.276	116.272	97.2833	172.192	292.529	312.169	351.57	0.846677	0.744875	0.951308	0.847105	0.833953	0.773498	1.97062	2.01016	2.17575	NM_027570	chr8:114150556-114150497	Ldhd	Mus musculus lactate dehydrogenase D (Ldhd), nuclear gene encoding mitochondrial protein, mRNA [NM_027570]	GO:0005515|GO:0006754|GO:0005739|GO:0016491|GO:0008720|GO:0004458|GO:0003824|GO:0005743|GO:0055114|GO:0050660	NM_027570	Mm.27589	52815	ENSMUST00000070004	TC1577050
A_51_P111492	0.000294116	2.13452	down	247.565	553.292	1.75438	2.84829	245.03	322.35	204.48	245.255	201.702	266.571	537.887	513.856	608.132	1.66377	2.11196	1.53673	1.92388	1.88591	1.404	2.84934	2.7292	2.96633	NM_017373	chr13:53062928-53062869	Nfil3	Mus musculus nuclear factor, interleukin 3, regulated (Nfil3), mRNA [NM_017373]	GO:0005634|GO:0043565|GO:0003700|GO:0006350|GO:0003674|GO:0003677|GO:0048511|GO:0046983|GO:0006355|GO:0005575|GO:0045449	NM_017373	Mm.136604	18030	ENSMUST00000071065	TC1582388
A_51_P324690	0.0700483	2.25545	down	6215.59	12792.3	6.20934	7.38276	2152	3740.13	4161.15	8895.83	7033.93	11310.5	13134.8	12491.1	12750.8	4.79842	5.64834	5.88368	7.10466	7.00995	6.811	7.4593	7.3326	7.35638	NM_053109	chr6:129136338-129136397	Clec2d	Mus musculus C-type lectin domain family 2, member d (Clec2d), mRNA [NM_053109]	GO:0045671|GO:0004872|GO:0005515|GO:0004888|GO:0005529|GO:0005886|GO:0005488|GO:0005887|GO:0046703|GO:0016020|GO:0006968|GO:0042270|GO:0009897|GO:0016021	NM_053109	Mm.197536	93694	ENSMUST00000032260	TC1585351
A_52_P407968	0.020318	1.53964	up	216.462	147.687	1.55782	0.935234	195.243	181.807	175.351	256.268	211.999	278.105	122.464	160.53	160.068	1.33608	1.28573	1.31502	1.98725	1.95774	1.46511	0.714399	1.05068	1.04062	AK006263	chr16:58507589-58507530		Putative uncharacterized protein Fragment [Source:UniProtKB/TrEMBL;Acc:Q9CVW3] [ENSMUST00000023427]			Mm.212742		ENSMUST00000023427	TC1645934
A_52_P947534	0.00681683	1.81383	down	44.1141	84.4824	-0.73802	0.121021	44.7811	33.4712	36.7445	53.1639	42.0897	54.4342	65.8592	90.9316	96.6564	-0.788225	-1.15568	-0.939624	-0.281882	-0.374773	-0.887933	-0.180502	0.230689	0.312877	NM_001077354	chrX:101273000-101272941	C77370	Mus musculus expressed sequence C77370 (C77370), mRNA [NM_001077354]	GO:0003676|GO:0008150|GO:0003674|GO:0006139|GO:0000166|GO:0005575|GO:0003887	NM_001077354	Mm.381907	245555	ENSMUST00000118314	TC1617573
A_51_P505571	0.02644	1.95616	up	771.674	397.987	3.3442	2.37618	612.849	547.783	482.597	1079.73	894.172	1012.91	405.656	383.612	404.692	2.98634	2.87693	2.77559	4.0622	4.03424	3.32992	2.4423	2.30748	2.37876	NM_133709	chr7:107177854-107182205	Chrdl2	Mus musculus chordin-like 2 (Chrdl2), mRNA [NM_133709]	GO:0005576|GO:0005515|GO:0051216|GO:0001503|GO:0007275|GO:0030514|GO:0030154|GO:0005575	NM_133709	Mm.285295	69121	ENSMUST00000032977	NP745854
A_52_P195640	0.0234065	1.57618	up	79.4994	53.003	0.115822	-0.540611	73.6133	69.4393	61.5359	96.589	82.1415	93.6774	45.5954	59.6161	53.7977	-0.0711484	-0.10285	-0.195724	0.579529	0.589872	-0.104744	-0.710999	-0.37839	-0.532444	NM_178737	chr9:39398266-39398207	AW551984	Mus musculus expressed sequence AW551984 (AW551984), mRNA [NM_178737]	GO:0008150|GO:0003674|GO:0005575	NM_178737	Mm.208855	244810	ENSMUST00000086047	TC1616653
A_52_P520466	0.0061178	2.03271	down	84.3246	178.83	0.183612	1.20702	75.6096	58.1169	74.8681	112.491	79.4344	105.428	144.732	185.48	206.276	-0.0325456	-0.359644	0.0871992	0.799402	0.541524	0.0657387	0.955426	1.2591	1.40652	NM_197959	chr11:102767305-102767246	Kif18b	Mus musculus kinesin family member 18B (Kif18b), mRNA [NM_197959]	GO:0005524|GO:0005874|GO:0007018|GO:0003774|GO:0000166|GO:0003777	NM_197959	Mm.32084	70218	ENSMUST00000021311	TC1578930
A_52_P614598	0.0886834	1.65643	up	45.7409	27.3622	-0.758006	-1.48609	25.9505	34.911	31.0281	57.9546	52.7129	71.8882	26.9126	28.1236	27.0504	-1.57535	-1.09492	-1.18358	-0.157407	-0.0500846	-0.486691	-1.47161	-1.46231	-1.52434	AK016285	chr16:78455444-78455503	4930572P05Rik	Mus musculus adult male testis cDNA, RIKEN full-length enriched library, clone:4930572P05 product:unclassifiable, full insert sequence. [AK016285]	GO:0008150|GO:0003674|GO:0005575			75912		TC1625567
A_52_P273891	0.00197884	1.6487	up	142.236	90.6661	0.959727	0.238393	157.864	169.833	138.479	135.858	108.373	143.008	92.122	81.6635	98.2128	1.02949	1.18744	0.974447	1.07169	0.989699	0.505583	0.303659	0.0755987	0.335923	NM_018881	chr1:164805589-164805530	Fmo2	Mus musculus flavin containing monooxygenase 2 (Fmo2), mRNA [NM_018881]	GO:0005792|GO:0031227|GO:0050661|GO:0016491|GO:0016020|GO:0006800|GO:0004497|GO:0004499|GO:0005575|GO:0016021|GO:0005783|GO:0050660|GO:0055114	NM_018881	Mm.10929	55990	ENSMUST00000045902	TC1582614
A_52_P141608	0.00505219	1.81809	down	748.086	1365.02	3.29036	4.15278	882.007	983.608	808.714	481.336	403.56	929.292	1464.55	1293.47	1337.03	3.5116	3.72141	3.5204	2.89664	2.88647	3.20561	4.29443	4.06101	4.1029	NM_183160	chr19:24752451-24752510	E030010A14Rik	Mus musculus RIKEN cDNA E030010A14 gene (E030010A14Rik), mRNA [NM_183160]	GO:0016020|GO:0008150|GO:0003674|GO:0016021|GO:0005575	NM_183160	Mm.391170	226040	ENSMUST00000057243	TC1584015
A_51_P241457	0.0182965	1.63427	down	59.9754	99.8183	-0.32902	0.379629	81.5207	70.6737	69.8605	48.3823	34.1631	55.2521	93.4997	100.834	105.121	0.0760512	-0.0774293	-0.0126767	-0.417851	-0.675799	-0.866416	0.325076	0.379815	0.433995	NM_013532	chr10:51212976-51213891	Lilrb4	Mus musculus leukocyte immunoglobulin-like receptor, subfamily B, member 4 (Lilrb4), mRNA [NM_013532]	GO:0004872|GO:0016020|GO:0005886|GO:0016021	NM_013532	Mm.34408	14728	ENSMUST00000105481	TC1572053
A_51_P122321	0.0392497	2.10227	down	278.161	575.01	1.8298	2.90175	183.934	170.093	167.834	407.343	346.433	393.329	514.46	570.203	640.366	1.25	1.18965	1.25181	2.65584	2.66627	1.96522	2.7851	2.87931	3.04084	NM_133775	chr19:30034990-30035049	Il33	Mus musculus interleukin 33 (Il33), transcript variant 2, mRNA [NM_133775]	GO:0005634|GO:0005576|GO:0008150|GO:0005125|GO:0005615	NM_133775	Mm.182359	77125	ENSMUST00000025724	TC1577383
A_51_P111488	0.000140208	1.59759	down	539.184	905.588	2.88655	3.56244	568.668	509.443	564.901	520.467	436.776	634.85	914.841	877.997	923.926	2.8784	2.77225	3.00277	3.0094	3.00058	2.6559	3.61556	3.50205	3.56972	NM_027469	chr8:108240340-108240281	Gfod2	Mus musculus glucose-fructose oxidoreductase domain containing 2 (Gfod2), mRNA [NM_027469]	GO:0005576|GO:0003674|GO:0008152|GO:0030198|GO:0031012|GO:0005488|GO:0016491|GO:0005578|GO:0003824|GO:0055114	NM_027469	Mm.40954	70575	ENSMUST00000013294	TC1580869
A_51_P335710	0.0482098	1.67229	down	205.718	342.832	1.41861	2.16043	294.532	262.822	258.7	135.015	117.916	165.324	329.53	338.648	360.318	1.92924	1.81741	1.87605	1.06272	1.11144	0.714779	2.14245	2.12762	2.21121	NM_018743	chr8:24292298-24291416	Agpat6	Mus musculus 1-acylglycerol-3-phosphate O-acyltransferase 6 (lysophosphatidic acid acyltransferase, zeta) (Agpat6), mRNA [NM_018743]	GO:0004366|GO:0008610|GO:0030176|GO:0016740|GO:0046339|GO:0008780|GO:0040014|GO:0019432|GO:0016020|GO:0002071|GO:0006631|GO:0008152|GO:0008415|GO:0007595|GO:0016021|GO:0030879|GO:0005783|GO:0006641|GO:0008654	NM_018743	Mm.200898	102247	ENSMUST00000033949	TC1631713
A_52_P1180340	0.00352983	2.57706	down	116.155	301.671	0.609154	1.97488	83.961	83.2425	78.5664	145.688	128.47	177.002	280.326	306.295	318.392	0.118604	0.158719	0.156759	1.17248	1.23512	0.813246	1.90915	1.98276	2.03274	AK039493	chr14:13241518-13241459		Mus musculus adult male spinal cord cDNA, RIKEN full-length enriched library, clone:A330050D14 product:unclassifiable, full insert sequence. [AK039493]
A_52_P149845	0.00037152	3.04679	down	36.99	123.859	-0.982559	0.624734	38.0352	29.4268	35.8711	39.8263	33.5423	45.2382	75.3786	141.373	154.827	-1.02378	-1.34147	-0.974329	-0.698607	-0.702258	-1.15491	0.0142698	0.867337	0.992594	AY173987			Mus musculus clone BaPB1-92 immunoglobulin heavy chain variable region mRNA, partial cds. [AY173987]			Mm.313389			NP594713
A_52_P363951	0.0164186	1.62896	down	480.074	808.996	2.69338	3.39734	640.92	577.686	502.125	420.313	333.314	406.085	772.691	773.885	880.413	3.05096	2.95361	2.83282	2.70106	2.61057	2.01126	3.37193	3.31995	3.50012	NM_011580	chr2:117951775-117951834	Thbs1	Mus musculus thrombospondin 1 (Thbs1), mRNA [NM_011580]	GO:0005576|GO:0005515|GO:0010811|GO:0007155|GO:0006954|GO:0005615|GO:0050840|GO:0003417|GO:0016525|GO:0005198|GO:0008201|GO:0005509	NM_011580	Mm.4159	21825	ENSMUST00000039559	TC1573966
A_51_P142621	0.00610847	1.58061	up	61.5193	40.9811	-0.248299	-0.908779	60.1281	63.9425	47.8929	60.0708	61.5424	75.5391	46.1998	38.972	37.7716	-0.363076	-0.221828	-0.557342	-0.105665	0.173341	-0.415222	-0.691998	-0.991655	-1.04269	NM_177092	chr10:120219510-120219451	Msrb3	Mus musculus methionine sulfoxide reductase B3 (Msrb3), mRNA [NM_177092]	GO:0030091|GO:0046872|GO:0008113|GO:0008270|GO:0005739|GO:0016491|GO:0000318|GO:0005783|GO:0055114	NM_177092	Mm.169755	320183	ENSMUST00000092143	TC1603000
A_52_P544433	0.000333604	4.74183	down	116.06	568.5	0.627462	2.87291	91.1761	89.7382	79.9699	168.999	133.279	133.198	455.778	576.962	672.76	0.237541	0.26712	0.182305	1.38661	1.28814	0.403054	2.61037	2.89631	3.11203	M32765	chr6:68654719-68654660		Mouse Ig rearranged kappa-chain mRNA V-region. [M32765]			Mm.423262		ENSMUST00000103330	TC1586807
A_52_P244682	0.0841764	1.83746	down	516.626	919.934	2.70726	3.58497	298.697	299.18	339.736	744.612	627.004	790.528	887.695	926.659	945.449	1.94949	2.00434	2.26919	3.52609	3.52216	2.9723	3.57211	3.57987	3.60294	NM_145509	chr1:133609265-133609324	5430435G22Rik	Mus musculus RIKEN cDNA 5430435G22 gene (5430435G22Rik), mRNA [NM_145509]	GO:0005764|GO:0015031|GO:0007264|GO:0005525|GO:0000166|GO:0006810	NM_145509	Mm.44508	226421	ENSMUST00000064664	NP572159
A_51_P513568	0.000722182	1.64907	down	110.723	192.479	0.602869	1.32452	120.084	113.475	92.7938	113.622	96.3805	127.983	174.227	193.567	209.644	0.634858	0.605702	0.396875	0.813847	0.820501	0.34543	1.22301	1.32067	1.42988	NM_029075	chr10:12660547-12660488	Stx11	Mus musculus syntaxin 11 (Stx11), transcript variant 1, mRNA [NM_029075]	GO:0006886|GO:0005515|GO:0016192|GO:0016020|GO:0015031|GO:0005484|GO:0006810|GO:0005794	NM_029075	Mm.248648	74732	ENSMUST00000042861	TC1583457
A_51_P401184	0.0236648	1.77932	down	186.428	340.671	1.31768	2.14901	137.285	148.096	138.464	237.896	207.255	249.575	313.002	339.567	369.444	0.827983	0.989862	0.974285	1.87993	1.92509	1.30896	2.06821	2.13153	2.24729	NM_001164763	chr3:67283137-67283078	Rarres1	Mus musculus retinoic acid receptor responder (tazarotene induced) 1 (Rarres1), mRNA [NM_001164763]	GO:0008150|GO:0003674|GO:0005575	NM_001164763	Mm.38002	109222	ENSMUST00000054825	TC1610913
A_51_P511015	0.064141	1.68967	down	164.812	275.158	1.08549	1.84222	249.659	205.929	210.432	110.292	90.7038	121.857	292.253	257.138	276.081	1.69077	1.46548	1.57813	0.770932	0.732923	0.274677	1.96926	1.73038	1.82703	NM_010246	chr5:135724874-135724815	Fzd9	Mus musculus frizzled homolog 9 (Drosophila) (Fzd9), mRNA [NM_010246]	GO:0004872|GO:0031527|GO:0004888|GO:0004930|GO:0005886|GO:0007275|GO:0042813|GO:0007186|GO:0004926|GO:0016055|GO:0007165|GO:0007611|GO:0016020|GO:0007166|GO:0048471|GO:0004871|GO:0007405|GO:0016021	NM_010246	Mm.6256	14371	ENSMUST00000062572	TC1587026
A_52_P115191	0.00155648	1.66435	down	552.246	970.341	2.92606	3.66102	634.652	533.207	564.621	525.927	491.665	563.402	952.208	928.754	1030.06	3.03678	2.83802	3.00206	3.02446	3.17136	2.48365	3.67332	3.58313	3.7266		chr17:39982047-39982408
A_51_P110576	0.000614963	1.68001	down	5466.17	9687.64	6.23322	6.98169	5545.22	5342.44	5009.65	5739.96	4943.59	6216.14	9402.7	9807.95	9852.26	6.16399	6.16275	6.15141	6.47257	6.50118	5.94743	6.97705	6.98372	6.98432	NM_011175	chr12:103632634-103632575	Lgmn	Mus musculus legumain (Lgmn), mRNA [NM_011175]	GO:0005764|GO:0040015|GO:0006508|GO:0016787|GO:0008233|GO:0005770|GO:0045177|GO:0008234|GO:0004197	NM_011175	Mm.17185	19141	ENSMUST00000021607	TC1575279
A_51_P247184	3.02831e-07	3.43605	down	36.6526	130.452	-1.01368	0.767069	35.2075	44.4719	32.1686	29.9125	28.4876	49.6673	134.325	126.946	130.084	-1.13523	-0.745709	-1.1315	-1.11158	-0.937903	-1.02015	0.847766	0.712055	0.741387	NM_008728	chr15:11769996-11769937	Npr3	Mus musculus natriuretic peptide receptor 3 (Npr3), transcript variant 1, mRNA [NM_008728]	GO:0004872|GO:0008528|GO:0042803|GO:0007193|GO:0007200|GO:0001501|GO:0016020|GO:0005624|GO:0008217|GO:0030146|GO:0007194|GO:0002158|GO:0033688|GO:0016021|GO:0016941|GO:0017046	NM_008728	Mm.25259	18162	ENSMUST00000066529	TC1607041
A_51_P148037	0.0441237	1.58328	down	480.693	784.767	2.68703	3.34994	383.724	382.025	348.932	622.07	500.161	647.25	683.822	836.569	833.91	2.31088	2.35699	2.30772	3.26668	3.19608	2.68381	3.19566	3.43232	3.42183	NM_177364	chr11:32327606-32327665	Sh3pxd2b	Mus musculus SH3 and PX domains 2B (Sh3pxd2b), mRNA [NM_177364]	GO:0045600|GO:0005515|GO:0042169|GO:0032266|GO:0030154|GO:0005737|GO:0010314|GO:0080025|GO:0070273|GO:0035091|GO:0007154	NM_177364	Mm.227616	268396	ENSMUST00000038753	TC1641971
A_52_P599533	4.42038e-05	1.5751	up	56.9892	38.0005	-0.359149	-1.0146	56.1307	54.483	58.2181	53.8775	46.4591	72.7671	34.9152	38.782	40.3043	-0.462325	-0.452797	-0.275685	-0.262648	-0.232279	-0.469159	-1.09603	-0.998705	-0.949054		chr11:62688694-62690173
A_52_P647260	0.00330735	2.25329	up	1152.84	556.1	3.98772	2.81568	1216.54	1058.47	1005.32	1179.59	1268.91	1188.18	732.696	534.667	400.937	3.97553	3.82723	3.83436	4.18981	4.5392	3.56017	3.29526	2.78648	2.36531	AK035258	chr3:122810303-122810244	Synpo2	Mus musculus adult male urinary bladder cDNA, RIKEN full-length enriched library, clone:9530006G20 product:unclassifiable, full insert sequence. [AK035258]	GO:0005634|GO:0005515|GO:0030018|GO:0005737|GO:0003779		Mm.34359	118449		TC1612214
A_51_P470989	0.0505704	1.61144	up	113.234	71.5483	0.586879	-0.101472	87.7874	81.9412	81.8302	152.726	115.688	159.434	65.857	73.619	75.169	0.182899	0.135987	0.21548	1.24054	1.08393	0.662438	-0.18055	-0.0740147	-0.0498509	NM_145457	chr13:120239562-120240599	Paip1	Mus musculus polyadenylate binding protein-interacting protein 1 (Paip1), transcript variant 1, mRNA [NM_145457]	GO:0016070|GO:0005515|GO:0008150|GO:0006417|GO:0003674|GO:0005737|GO:0005488|GO:0005575	NM_145457	Mm.132584	218693	ENSMUST00000126957	TC1584473
A_51_P230103	0.0569313	1.73068	down	3005.76	5252.92	5.30489	6.09622	2244.25	1802.68	2357.03	4051.32	3478.07	4101.18	4810.05	5561.11	5387.59	4.85897	4.5954	5.06367	5.96992	5.9939	5.34745	6.01002	6.16514	6.11351	NM_001012273	chr11:117716959-117717018	Birc5	Mus musculus baculoviral IAP repeat-containing 5 (Birc5), transcript variant 3, mRNA [NM_001012273]	GO:0007059|GO:0043524|GO:0004869|GO:0007067|GO:0016324|GO:0000226|GO:0051301|GO:0005694|GO:0007049|GO:0030414|GO:0005634|GO:0046872|GO:0000775|GO:0006916|GO:0030496|GO:0005737|GO:0005856|GO:0045787|GO:0009790|GO:0006915|GO:0005622	NM_001012273	Mm.8552	11799	ENSMUST00000106322	TC1619492
A_52_P88296	0.0289916	1.52711	up	71.5281	49.1025	-0.0549683	-0.665774	71.2865	49.783	62.9729	68.2727	71.445	105.409	37.1748	54.8478	55.2849	-0.117487	-0.582949	-0.162423	0.0789795	0.388594	0.0654759	-1.00556	-0.498659	-0.493103		chr10:75603038-75603097
A_52_P59124	0.00342729	1.66617	down	548.876	966.464	2.92009	3.65663	588.594	511.314	539.313	524.832	560.153	569.052	966.059	973.897	959.437	2.92809	2.77754	2.9359	3.02145	3.35951	2.49804	3.69415	3.6516	3.62413	NM_001025610	chr19:11396063-11396004	Ms4a7	Mus musculus membrane-spanning 4-domains, subfamily A, member 7 (Ms4a7), transcript variant 2, mRNA [NM_001025610]		NM_001025610	Mm.193094	109225	ENSMUST00000067532	TC1590323
A_51_P169671	0.0468296	2.0326	down	9854.46	19365.4	6.95247	7.97579	4622.77	12410.1	5233.32	10346.3	10436.8	16077.5	17127.8	21117.1	19851.3	5.9015	7.3787	6.21443	7.32257	7.57922	7.31838	7.84224	8.0901	7.99503	NM_011036	chr6:78323323-78323382	Reg3b	Mus musculus regenerating islet-derived 3 beta (Reg3b), mRNA [NM_011036]	GO:0005576|GO:0006954|GO:0005529|GO:0006953|GO:0005488	NM_011036	Mm.2553	18489	ENSMUST00000096904	TC1576607
A_52_P875110	0.00493764	1.5007	up	71.229	49.6239	-0.0460827	-0.631718	76.0973	85.3093	77.7576	65.2869	48.8261	74.0969	44.3403	53.9679	50.5633	-0.0232706	0.194101	0.14183	0.0144634	-0.160587	-0.443034	-0.751267	-0.52199	-0.621897	AK020736	chr9:118488840-118488899	A330105O20Rik	Mus musculus adult male spinal cord cDNA, RIKEN full-length enriched library, clone:A330105O20 product:unclassifiable, full insert sequence. [AK020736]	GO:0008150|GO:0003674|GO:0005575		Mm.10409	78590		TC1705050
A_51_P455090	0.00206758	1.82892	up	316.495	182.4	2.12003	1.24903	365.696	284.092	294.621	354.213	285.136	315.215	169.627	192.595	184.977	2.24146	1.92969	2.06364	2.45421	2.38534	1.64582	1.18441	1.3134	1.24929	AK028683	chr1:67277466-67277525	Cps1	carbamoyl-phosphate synthetase 1 Gene [Source:MGI Symbol;Acc:MGI:891996] [ENSMUST00000027144]	GO:0055081|GO:0005515|GO:0005524|GO:0043234|GO:0005739|GO:0000166|GO:0003824|GO:0005743|GO:0004086|GO:0008152|GO:0000050|GO:0004087|GO:0006541|GO:0005737|GO:0006807|GO:0005543|GO:0032403|GO:0016874		Mm.343942	227231	ENSMUST00000027144	TC1598315
A_51_P508775	0.0020731	1.53978	up	157.257	106.685	1.08573	0.463013	162.4	179.47	128.886	133.536	120.09	219.16	127.917	99.8883	92.2503	1.07036	1.26707	0.870874	1.04683	1.1378	1.12147	0.777249	0.366223	0.245566	NM_011846	chr5:130113388-130113447	Mmp17	Mus musculus matrix metallopeptidase 17 (Mmp17), mRNA [NM_011846]	GO:0005576|GO:0005886|GO:0004222|GO:0008233|GO:0005578|GO:0005509|GO:0006508|GO:0016787|GO:0046872|GO:0016020|GO:0008152|GO:0008270|GO:0031012|GO:0008237|GO:0031225	NM_011846	Mm.42047	23948	ENSMUST00000031390	TC1579514
A_51_P110455	5.84923e-05	2.05353	down	5123.76	11085.5	6.13672	7.17482	5434.76	4551.78	4824.53	5010.96	4744.24	6176.31	10688.5	10725.4	11842.6	6.13496	5.93168	6.09709	6.27661	6.44179	5.93815	7.16196	7.11272	7.24978	NM_013559	chr5:150419485-150419426	Hsph1	Mus musculus heat shock 105kDa/110kDa protein 1 (Hsph1), mRNA [NM_013559]	GO:0005634|GO:0005515|GO:0005524|GO:0006950|GO:0005737|GO:0000166|GO:0051085	NM_013559	Mm.270681	15505	ENSMUST00000110499	TC1595034
A_52_P633714	0.00332175	1.56394	down	37.1461	60.8774	-0.979164	-0.333981	35.4376	35.0975	30.0206	36.9594	36.4766	48.885	60.899	57.0453	64.688	-1.12583	-1.08724	-1.2312	-0.80639	-0.58127	-1.04306	-0.293468	-0.441985	-0.26649	NM_030159	chr15:98912657-98912716	Troap	Mus musculus trophinin associated protein (Troap), transcript variant 1, mRNA [NM_030159]	GO:0008150|GO:0003674|GO:0005575	NM_030159	Mm.124905	78733	ENSMUST00000039665	TC1660439
A_52_P639377	0.0288268	1.74131	up	129.365	76.4346	0.772386	-0.027789	184.782	152.795	155.815	98.7137	77.4532	106.633	59.4013	93.0476	76.8548	1.25664	1.03492	1.14461	0.61092	0.505085	0.082139	-0.329391	0.263876	-0.0178518	AK083944	chr3:106310261-106310202	9030425P06Rik	Mus musculus 12 days embryo spinal ganglion cDNA, RIKEN full-length enriched library, clone:D130067I06 product:unclassifiable, full insert sequence. [AK083944]	GO:0008150|GO:0003674|GO:0005575		Mm.442930	319680
A_52_P106482	0.0252611	1.59894	up	2198.31	1453.78	4.89787	4.22076	2013.37	1969.6	1623.85	2219.64	2370.41	2992.99	1825.33	1365.68	1170.32	4.70235	4.72315	4.52613	5.10185	5.44076	4.893	4.61213	4.13938	3.91077	NM_009964	chr9:50564440-50564499	Cryab	Mus musculus crystallin, alpha B (Cryab), mRNA [NM_009964]	GO:0008092|GO:0005886|GO:0060561|GO:0043066|GO:0002088|GO:0042542|GO:0005212|GO:0031109|GO:0030308|GO:0043292|GO:0006800|GO:0005829|GO:0043010|GO:0043154|GO:0006457|GO:0009408|GO:0015630|GO:0032432|GO:0005794|GO:0005515|GO:0007517|GO:0030018|GO:0005626|GO:0006950|GO:0009986|GO:0005739|GO:0010629|GO:0006006|GO:0008017|GO:0001666|GO:0007021|GO:0051403|GO:0005625	NM_009964	Mm.178	12955	ENSMUST00000093849	TC1572066
A_52_P544090	0.0224918	2.04978	down	121.209	269.029	0.686353	1.72182	168.143	137.294	151.5	96.9982	75.8312	97.486	150.555	306.47	350.062	1.1205	0.880594	1.1041	0.585628	0.474553	-0.0472507	1.01233	1.98358	2.16955	AF218659	chr12:116431921-116431862		Mus musculus clone nMeV21 immunoglobulin heavy chain variable region mRNA, partial cds. [AF218659]			Mm.313452			NP206964
A_51_P313581	0.0140633	2.16738	down	41963.8	87556.1	9.03323	10.1492	40736.6	62999.1	48510.5	18717	21674.1	59145.2	101566	80290.1	80812.2	9.041	9.72251	9.42693	8.1778	8.63352	9.1976	10.4102	10.0169	10.0204	NM_007980	chr3:122602276-122602335	Fabp2	Mus musculus fatty acid binding protein 2, intestinal (Fabp2), mRNA [NM_007980]	GO:0005504|GO:0005215|GO:0044424|GO:0005886|GO:0005324|GO:0005488|GO:0045179|GO:0006810|GO:0008289|GO:0050892|GO:0006631|GO:0015909|GO:0005737|GO:0005902	NM_007980	Mm.28398	14079	ENSMUST00000023820	TC1578192
A_51_P287093	0.00791275	1.94541	down	295.921	599.358	1.99952	2.95959	222.169	236.883	269.114	390.377	294.857	362.129	523.47	599.435	675.168	1.52247	1.6675	1.93299	2.59447	2.4337	1.84599	2.81015	2.95144	3.11719	NM_172301	chr13:101549033-101548974	Ccnb1	Mus musculus cyclin B1 (Ccnb1), mRNA [NM_172301]	GO:0033129|GO:0005515|GO:0035173|GO:0001556|GO:0007067|GO:0060045|GO:0001701|GO:0001933|GO:0051301|GO:0007049|GO:0019901|GO:0060623|GO:0006461|GO:0010629|GO:0031442|GO:0005634|GO:0005624|GO:0016301|GO:0006468|GO:0005737|GO:0005856|GO:0032403|GO:0005625	NM_172301	Mm.260114	268697	ENSMUST00000072119	TC1573329
A_51_P476767	0.0366038	1.84164	down	84.6725	155.676	0.140943	1.02194	64.2698	56.2954	53.2529	110.719	93.805	129.693	158.054	149.675	159.299	-0.266973	-0.405584	-0.404292	0.776497	0.781426	0.364584	1.08246	0.949666	1.03368	NM_010924	chr9:48400174-48400115	Nnmt	Mus musculus nicotinamide N-methyltransferase (Nnmt), mRNA [NM_010924]	GO:0016740|GO:0008168|GO:0008112|GO:0005737|GO:0005625	NM_010924	Mm.458542	18113	ENSMUST00000034808	NP1217891
A_52_P207406	0.00880038	1.59838	down	110.226	186.517	0.596616	1.27322	126.354	96.2585	111.891	123.23	93.4809	110.142	158.434	189.904	211.214	0.708281	0.368312	0.666869	0.930957	0.776431	0.128844	1.08592	1.29311	1.44064	NM_021436	chr4:48675072-48675131	Tmeff1	Mus musculus transmembrane protein with EGF-like and two follistatin-like domains 1 (Tmeff1), mRNA [NM_021436]	GO:0016020|GO:0005886|GO:0007275|GO:0016021	NM_021436	Mm.422686	230157	ENSMUST00000130834	TC1635873
A_52_P547486	0.0163641	1.50499	down	3372.99	5305.43	5.51776	6.10751	4159.7	3691.3	3877.18	2972.1	2425.46	3112.2	4695.09	5375.57	5845.63	5.74922	5.62938	5.78171	5.52301	5.47388	4.94934	5.97512	6.11618	6.23123	NM_016739	chr2:103606192-103606133	Caprin1	Mus musculus cell cycle associated protein 1 (Caprin1), transcript variant 1, mRNA [NM_016739]	GO:0042995|GO:0005737	NM_016739	Mm.427589	53872	ENSMUST00000111146	TC1573855
A_51_P108923	0.000653508	2.09599	up	93.0509	46.9855	0.346656	-0.720974	113.188	94.6266	102.391	86.5388	71.1966	90.3643	45.777	55.9186	39.2608	0.54954	0.343644	0.538862	0.421018	0.383569	-0.156693	-0.705262	-0.470764	-0.986897	AK035046	chr16:52424882-52424823		Mus musculus 12 days embryo embryonic body between diaphragm region and neck cDNA, RIKEN full-length enriched library, clone:9430078N17 product:unclassifiable, full insert sequence. [AK035046]
A_52_P674808	0.000619898	2.24891	up	420.783	195.934	2.52343	1.3542	425.641	344.079	347.004	488.147	424.653	495.176	197.67	197.608	192.524	2.46045	2.20607	2.29973	2.91691	2.95997	2.29742	1.40514	1.35048	1.30698	NM_031258	chrX:139731868-139731809	Chrdl1	Mus musculus chordin-like 1 (Chrdl1), transcript variant 2, mRNA [NM_031258]	GO:0007399|GO:0005576|GO:0001503|GO:0007275|GO:0030154	NM_031258	Mm.479282	83453	ENSMUST00000074660	TC1582340
A_51_P387348	0.0393061	1.53981	up	111.854	73.3322	0.558982	-0.0637668	148.539	147.553	127.227	73.7631	67.1654	106.879	75.1612	72.5922	72.2433	0.941652	0.984563	0.852178	0.19057	0.299478	0.085454	0.0101023	-0.0942788	-0.107124	NM_009630	chr10:74797351-74797411	Adora2a	Mus musculus adenosine A2a receptor (Adora2a), mRNA [NM_009630]	GO:0006469|GO:0048812|GO:0004930|GO:0005886|GO:0040013|GO:0030147|GO:0043025|GO:0050728|GO:0042311|GO:0035249|GO:0032230|GO:0001963|GO:0031802|GO:0016020|GO:0014069|GO:0007205|GO:0031558|GO:0051925|GO:0043154|GO:0008285|GO:0004872|GO:0005882|GO:0051881|GO:0030424|GO:0043116|GO:0014049|GO:0007165|GO:0030819|GO:0060134|GO:0043279|GO:0051372|GO:0004871|GO:0007271|GO:0045211|GO:0046982|GO:0046636|GO:…	NM_009630	Mm.333734	11540	ENSMUST00000020395	TC1582793
A_52_P980244	0.00101131	1.85128	down	34.1258	65.9861	-1.1071	-0.218581	40.6239	28.901	27.1713	38.0554	29.1278	40.8756	60.6917	66.7456	70.5209	-0.928787	-1.36748	-1.37507	-0.764228	-0.905842	-1.30121	-0.298387	-0.215419	-0.141937	AK083715	chrX:158272193-158272134		Nance-Horan syndrome (human) Gene [Source:MGI Symbol;Acc:MGI:2684894] [ENSMUST00000087085]					ENSMUST00000087085	TC1612329
A_52_P493925	0.0183337	2.02724	down	601.954	1214.7	2.96689	3.9864	424.237	441.26	371.895	799.698	621.943	952.693	1198.14	1220.03	1225.95	2.45568	2.56496	2.39967	3.62905	3.51047	3.24149	4.00476	3.97668	3.97776	NM_027280	chr8:91116416-91116475	Nkd1	Mus musculus naked cuticle 1 homolog (Drosophila) (Nkd1), transcript variant 1, mRNA [NM_027280]	GO:0005515|GO:0016020|GO:0005886|GO:0007275|GO:0030154|GO:0005737|GO:0016055|GO:0007283|GO:0005509	NM_027280	Mm.30219	93960		TC1617928
A_52_P685539	0.00995374	1.56671	down	48.0809	79.334	-0.600512	0.0472288	46.4421	41.5277	41.8332	53.491	49.0624	56.1289	72.7089	81.2886	84.0046	-0.735682	-0.844529	-0.752506	-0.273033	-0.153622	-0.843701	-0.0377541	0.0689602	0.11048	NM_183287	chr16:17121162-17121103	2610318N02Rik	Mus musculus RIKEN cDNA 2610318N02 gene (2610318N02Rik), mRNA [NM_183287]	GO:0008150|GO:0003674|GO:0005575	NM_183287	Mm.234165	70458	ENSMUST00000115714	TC1663079
A_52_P168505	0.00255018	1.57731	down	34.3821	55.6563	-1.12124	-0.463779	38.7828	32.0053	41.4655	29.6324	20.2258	44.1809	60.0044	54.5349	52.4296	-0.995698	-1.22029	-0.765241	-1.12515	-1.43204	-1.18902	-0.314817	-0.506914	-0.569606	NM_026647	chr4:82452176-82452117	Zdhhc21	Mus musculus zinc finger, DHHC domain containing 21 (Zdhhc21), mRNA [NM_026647]	GO:0046872|GO:0016020|GO:0008150|GO:0003674|GO:0008415|GO:0016740|GO:0008270|GO:0016021|GO:0005575	NM_026647	Mm.32047	68268	ENSMUST00000107239	TC1585727
A_51_P164014	0.0478177	1.65647	down	1751.9	2966.39	4.54546	5.27357	1346.8	1177.19	1419.44	2287.86	1962.03	2318.09	2811.36	3032.65	3055.16	4.12228	3.9806	4.33202	5.14553	5.16796	4.52435	5.23524	5.29034	5.29511	NM_173762	chr3:134936387-134936446	Cenpe	Mus musculus centromere protein E (Cenpe), mRNA [NM_173762]	GO:0045842|GO:0007088|GO:0051987|GO:0008608|GO:0007067|GO:0007275|GO:0005524|GO:0050793|GO:0051301|GO:0000166|GO:0007049|GO:0019901|GO:0003777|GO:0051984|GO:0045860|GO:0043515|GO:0000775|GO:0007094|GO:0005737|GO:0005856|GO:0045184|GO:0007018|GO:0003774|GO:0000776	NM_173762	Mm.161470	229841	ENSMUST00000062893	TC1580106
A_52_P232314	0.0997684	1.96011	down	102.749	234.151	0.433725	1.40466	91.0471	58.105	76.3251	145.829	110.969	134.218	88.7175	311.837	301.9	0.235498	-0.359939	0.115004	1.17388	1.02384	0.414065	0.249332	2.00863	1.95601		chr15:44114620-44114679
A_52_P20391	5.53604e-05	2.33483	up	74.88	33.4576	0.024963	-1.19835	97.3712	81.6497	65.8376	59.2084	62.5058	82.7074	30.6085	34.9428	34.8215	0.332379	0.130846	-0.0982413	-0.126527	0.19575	-0.284429	-1.28595	-1.1491	-1.16001	CB182661	chr18:61806830-61806771		AGENCOURT_11383195 NIH_MGC_164 Mus musculus cDNA clone IMAGE:30243035 5', mRNA sequence [CB182661]			Mm.426593			TC1618732
A_52_P269143	0.00021578	2.00243	down	249.123	520.08	1.76081	2.76256	199.667	303.117	233.377	241.336	206.564	310.678	514.422	516.729	529.089	1.36841	2.0232	1.72744	1.90064	1.92028	1.6249	2.78499	2.73724	2.76545	AK052608	chr5:99312427-99312486	D630004D15Rik	Mus musculus 0 day neonate kidney cDNA, RIKEN full-length enriched library, clone:D630004D15 product:unclassifiable, full insert sequence. [AK052608]	GO:0008150|GO:0003674|GO:0005575		Mm.136461	319746
A_51_P468464	2.79288e-05	1.69329	down	387.013	689.283	2.40862	3.16844	387.523	390.646	384.475	361.038	325.985	472.41	712.396	664.243	691.21	2.3251	2.38919	2.44766	2.48175	2.57849	2.22952	3.25472	3.09955	3.15106	NM_201352	chr7:106609102-106609161	Gdpd5	Mus musculus glycerophosphodiester phosphodiesterase domain containing 5 (Gdpd5), mRNA [NM_201352]	GO:0007399|GO:0006071|GO:0008150|GO:0008081|GO:0006629|GO:0016787|GO:0003674|GO:0016020|GO:0042995|GO:0008889|GO:0005737|GO:0005575|GO:0016021	NM_201352	Mm.286317	233552	ENSMUST00000037528	TC1575283
A_51_P398971	0.000129957	1.90853	down	274.024	550.014	1.90769	2.84015	312.678	288.58	252.02	283.704	210.619	296.544	516.43	531.409	602.204	2.01549	1.9523	1.83831	2.13399	1.94832	1.55773	2.79061	2.77766	2.95219	NM_010517	chr11:98909591-98909650	Igfbp4	Mus musculus insulin-like growth factor binding protein 4 (Igfbp4), mRNA [NM_010517]	GO:0005576|GO:0005520|GO:0005615|GO:0019838|GO:0001558	NM_010517	Mm.233799	16010	ENSMUST00000017637	TC1758796
A_51_P145130	0.00111481	2.48886	down	213.188	530.902	1.47555	2.79104	302.959	245.594	249.26	125.235	123.818	232.259	503.699	529.208	559.799	1.96993	1.7196	1.82243	0.954236	1.18191	1.20522	2.7546	2.77167	2.84685	NM_001024714	chr14:56592658-56592716	Cma2	Mus musculus chymase 2, mast cell (Cma2), mRNA [NM_001024714]	GO:0016787|GO:0008150|GO:0003674|GO:0008236|GO:0008233|GO:0005575	NM_001024714	Mm.378966	545055	ENSMUST00000089555	NP057780
A_51_P134475	0.00175854	1.54219	down	312.394	506.926	2.0993	2.72428	340.008	287.411	298.649	342.402	254.86	351.033	479.205	507.086	534.486	2.13638	1.94644	2.08323	2.40529	2.2234	1.80109	2.68268	2.71007	2.78009	NM_022995	chr2:173101608-173059923	Pmepa1	Mus musculus prostate transmembrane protein, androgen induced 1 (Pmepa1), mRNA [NM_022995]	GO:0005515|GO:0016020|GO:0008150|GO:0005886|GO:0016021|GO:0005575	NM_022995	Mm.478899	65112	ENSMUST00000036248	TC1582547
A_51_P494430	0.000712634	1.76996	up	752.192	443.852	3.35389	2.53017	946.21	798.654	797.477	667.371	530.811	772.631	398.837	466.485	466.235	3.61297	3.4209	3.50022	3.36809	3.28189	2.93926	2.41784	2.58967	2.583	NM_031166	chr13:48359180-48359239	Id4	Mus musculus inhibitor of DNA binding 4 (Id4), mRNA [NM_031166]	GO:0048712|GO:0005515|GO:0008283|GO:0007420|GO:0045449|GO:0021766|GO:0030528|GO:0005634|GO:0021895|GO:0045665|GO:0000082|GO:0007405|GO:0008284	NM_031166	Mm.458006	15904	ENSMUST00000021810	TC1582936
A_52_P319552	0.0965403	1.50333	down	67.9464	94.1028	-0.293903	0.294262	46.6137	56.6616	54.5615	44.8057	39.893	165.143	90.9528	101.154	90.2017	-0.730361	-0.396231	-0.36927	-0.528648	-0.452105	0.7132	0.285232	0.384389	0.213166	NM_001162980	chr4:104688863-104688922	1700024P16Rik	Mus musculus RIKEN cDNA 1700024P16 gene (1700024P16Rik), mRNA [NM_001162980]	GO:0008150|GO:0003674|GO:0005575	NM_001162980	Mm.65181	242594	ENSMUST00000106803	TC1612926
A_52_P281659	0.0613102	1.5303	up	103.478	65.507	0.367365	-0.246452	82.2381	77.525	86.6205	83.5637	63.377	227.542	81.466	57.0701	57.9849	0.0886912	0.0560598	0.297555	0.370546	0.215719	1.17562	0.126312	-0.441357	-0.424312	AK002926	chr7:71069606-71036675		Kruppel-like factor 13 Gene [Source:MGI Symbol;Acc:MGI:1354948] [ENSMUST00000008043]					ENSMUST00000008043	NP359933
A_51_P257824	3.36342e-05	1.55768	up	154.12	103.358	1.07046	0.431067	180.257	151.946	148.655	129.946	122.054	191.864	105.107	99.4503	105.517	1.22087	1.02688	1.07674	1.00751	1.16121	0.929567	0.493901	0.359884	0.439415	AK033267	chr10:57738367-57738426	Gcc2	Mus musculus 15 days embryo male testis cDNA, RIKEN full-length enriched library, clone:8030479H22 product:unclassifiable, full insert sequence. [AK033267]	GO:0016020|GO:0005737|GO:0005794		Mm.25531	70297		TC1611882
A_52_P423810	0.00153328	2.16442	up	341.818	164.471	2.21052	1.09654	279.552	338.575	251.115	409.158	329.685	442.825	176.74	171.379	145.294	1.85393	2.1828	1.83312	2.66226	2.59478	2.13622	1.24367	1.14502	0.90092	AK154954	chr8:96703844-96703903		metallothionein 1 Gene [Source:MGI Symbol;Acc:MGI:97171] [ENSMUST00000062980]			Mm.192991		ENSMUST00000062980	TC1631988
A_52_P1147595	0.0664633	1.82398	down	143.643	242.131	0.791867	1.65896	79.6825	274.826	144.439	86.389	68.3864	208.133	232.992	241.07	252.331	0.0431476	1.88185	1.03523	0.418518	0.32547	1.04699	1.64232	1.63729	1.69726	AK033690	chr8:5084150-5084091	9130221J18Rik	Mus musculus adult male cecum cDNA, RIKEN full-length enriched library, clone:9130221J18 product:unclassifiable, full insert sequence. [AK033690]	GO:0008150|GO:0003674|GO:0005575		Mm.207250	102123
A_51_P257496	0.000185981	1.94501	up	574.403	311.056	2.9804	2.02062	563.733	583.861	533.496	640.74	484.612	639.974	299.794	318.694	314.68	2.86582	2.96895	2.92025	3.30934	3.15052	2.6675	2.00601	2.04001	2.01583	NM_027286	chrX:160625488-160625547	Ace2	Mus musculus angiotensin I converting enzyme (peptidyl-dipeptidase A) 2 (Ace2), transcript variant 2, mRNA [NM_027286]	GO:0004180|GO:0005576|GO:0005886|GO:0042277|GO:0008233|GO:0006508|GO:0016787|GO:0046872|GO:0016020|GO:0005624|GO:0008241|GO:0008237|GO:0016021|GO:0017046	NM_027286	Mm.13451	70008	ENSMUST00000112271	TC1644033
A_52_P1147453	0.022063	1.99876	down	38.1589	75.4294	-1.0302	-0.0310918	18.0103	36.7748	34.2136	44.0033	30.4899	65.4613	65.4831	75.7136	85.0915	-2.10229	-1.01989	-1.04258	-0.554718	-0.839909	-0.621803	-0.188763	-0.0335393	0.129027	NM_001161765	chr3:97457388-97457447	Fmo5	Mus musculus flavin containing monooxygenase 5 (Fmo5), transcript variant 1, mRNA [NM_001161765]	GO:0005792|GO:0016020|GO:0031227|GO:0050661|GO:0016491|GO:0004497|GO:0004499|GO:0016021|GO:0005783|GO:0055114|GO:0050660	NM_001161765	Mm.385180	14263	ENSMUST00000107050	TC1662855
A_52_P13448	0.000740214	1.68786	down	1383.09	2466.65	4.25146	5.00665	1469.52	1276.52	1388.72	1398.48	1244.16	1521.13	2317.07	2466.6	2616.28	4.24808	4.09747	4.30046	4.43539	4.51079	3.91656	4.95627	4.99229	5.07139	NM_026515	chr9:65749677-65749736	2810417H13Rik	Mus musculus RIKEN cDNA 2810417H13 gene (2810417H13Rik), mRNA [NM_026515]	GO:0005634|GO:0005739	NM_026515	Mm.351273	68026	ENSMUST00000045802	TC1607082
A_51_P344008	0.0336851	1.56513	down	1716.97	2711.62	4.49849	5.14477	1988.69	2380.58	2097.28	1136.83	1011.63	1686.82	2669.03	2783.64	2682.19	4.68456	4.99657	4.89522	4.13655	4.2123	4.06571	5.16028	5.16674	5.10728	NM_020520	chr9:108585399-108585458	Slc25a20	Mus musculus solute carrier family 25 (mitochondrial carnitine/acylcarnitine translocase), member 20 (Slc25a20), nuclear gene encoding mitochondrial protein, mRNA [NM_020520]	GO:0005215|GO:0016020|GO:0008150|GO:0003674|GO:0055085|GO:0005739|GO:0005488|GO:0016021|GO:0006810|GO:0005743	NM_020520	Mm.29666	57279	ENSMUST00000035222	TC1576129
A_52_P180373	0.00239562	1.68997	down	36.3441	64.4453	-1.01546	-0.258462	43.994	42.591	37.6517	29.1284	28.2497	36.45	54.929	67.7101	70.6967	-0.813807	-0.808053	-0.904437	-1.1499	-0.950006	-1.46653	-0.442317	-0.194722	-0.138346	NM_010821	chr19:12537697-12537756	Mpeg1	Mus musculus macrophage expressed gene 1 (Mpeg1), mRNA [NM_010821]	GO:0016020|GO:0016021	NM_010821	Mm.3999	17476	ENSMUST00000081035	TC1658796
A_52_P184544	0.000303811	1.87976	down	88.24	173.539	0.266177	1.17673	109.378	84.7994	95.7877	82.9302	64.2437	92.3016	159.49	182.132	178.995	0.50013	0.185452	0.442688	0.359567	0.235315	-0.12609	1.09551	1.23282	1.20186	NM_029835	chr7:86842331-86842390	5730590G19Rik	Mus musculus RIKEN cDNA 5730590G19 gene (5730590G19Rik), mRNA [NM_029835]	GO:0006974|GO:0005634|GO:0008150|GO:0003674|GO:0007049|GO:0005575|GO:0006281	NM_029835	Mm.28132	77011	ENSMUST00000035977	TC1581550
A_51_P520849	0.0013378	1.65247	up	416.254	265.309	2.51364	1.78902	485.139	409.798	401.59	437.388	333.307	430.302	246.161	264.653	285.112	2.64921	2.45824	2.5105	2.75851	2.61054	2.09483	1.72164	1.77194	1.87347	NM_009144	chr3:83577864-83577923	Sfrp2	Mus musculus secreted frizzled-related protein 2 (Sfrp2), mRNA [NM_009144]	GO:0005515|GO:0005576|GO:0090090|GO:0060349|GO:0051216|GO:0035121|GO:0090175|GO:0042733|GO:0007275|GO:0008219|GO:0030154|GO:0042981|GO:0002063|GO:0016055|GO:0031668|GO:0042127|GO:0043508|GO:0048547|GO:0042662|GO:0017147|GO:0006915|GO:0001756|GO:0009952	NM_009144	Mm.19155	20319	ENSMUST00000029625	TC1575182
A_51_P488739	0.000347033	2.68576	down	45.5284	126.912	-0.697732	0.727598	65.4458	48.8793	40.1271	41.6897	37.4564	39.5723	124.909	126.248	129.58	-0.240815	-0.609378	-0.812577	-0.63264	-0.543027	-1.34795	0.742923	0.704093	0.735779	NM_030701	chr5:124313790-124313731	Niacr1	Mus musculus niacin receptor 1 (Niacr1), mRNA [NM_030701]	GO:0004872|GO:0016020|GO:0004930|GO:0005886|GO:0005525|GO:0007186|GO:0004871|GO:0001614|GO:0006915|GO:0016021|GO:0007165	NM_030701	Mm.440567	80885		TC1583637
A_51_P274992	0.00354798	1.54935	down	381.63	625.551	2.39224	3.0239	431.506	351.667	375.443	391.822	334.492	404.851	554.265	645.224	677.162	2.48019	2.23754	2.41337	2.5998	2.61566	2.00687	2.89262	3.05764	3.12144	NM_026578	chr3:129532317-129532258	Gar1	Mus musculus GAR1 ribonucleoprotein homolog (yeast) (Gar1), mRNA [NM_026578]	GO:0030515|GO:0005634|GO:0008150|GO:0001651|GO:0031429|GO:0003723|GO:0009982|GO:0030529|GO:0006364|GO:0042254	NM_026578	Mm.24873	68147	ENSMUST00000149071	TC1775923
A_52_P144285	0.00253626	1.71976	down	117.645	211.242	0.680042	1.46225	115.167	97.8718	96.2561	134.177	110.399	151.999	202.916	213.923	216.888	0.574537	0.392291	0.449726	1.05374	1.01641	0.593544	1.44292	1.46493	1.47889	NM_175382	chr1:133430451-133430510	Fam72a	Mus musculus family with sequence similarity 72, member A (Fam72a), mRNA [NM_175382]	GO:0008150|GO:0003674|GO:0005575	NM_175382	Mm.31278	108900	ENSMUST00000068613	TC1585058
A_51_P487999	0.0128649	1.54987	down	661.786	1071.13	3.1725	3.80464	617.281	510.462	607.864	779.512	627.201	828.397	1037.4	1087.18	1088.82	2.99674	2.77513	3.10852	3.59217	3.52262	3.0398	3.79694	3.81035	3.80663	NM_028232	chr17:53815496-53815437	Sgol1	Mus musculus shugoshin-like 1 (S. pombe) (Sgol1), mRNA [NM_028232]	GO:0045132|GO:0007059|GO:0008150|GO:0007067|GO:0051301|GO:0007049|GO:0000780|GO:0005634|GO:0000775|GO:0003674|GO:0030892|GO:0005737|GO:0005856|GO:0000776	NM_028232	Mm.153202	72415	ENSMUST00000024736	TC1578833
A_52_P503071	0.00416026	1.63692	down	48.4703	81.9757	-0.616703	0.0942788	62.9181	51.4688	55.9163	39.3619	31.212	49.9446	76.5114	80.3286	89.087	-0.297641	-0.534905	-0.333884	-0.71553	-0.80614	-1.01212	0.0357885	0.0518217	0.195226	NM_138600	chr18:56718940-56718881	Aldh7a1	Mus musculus aldehyde dehydrogenase family 7, member A1 (Aldh7a1), transcript variant 1, mRNA [NM_138600]	GO:0004043|GO:0008152|GO:0005739|GO:0016491|GO:0055114	NM_138600	Mm.30250	110695	ENSMUST00000116635	TC1742426
A_51_P263568	7.46106e-07	2.31563	down	47.7989	115.405	-0.621235	0.590168	46.5568	45.3641	51.7846	40.8824	37.9508	64.2545	119.167	111.891	115.157	-0.732124	-0.717052	-0.444629	-0.660849	-0.52411	-0.648648	0.675028	0.529931	0.565545	NM_175440	chr17:24182617-24182676	Prss27	Mus musculus protease, serine 27 (Prss27), mRNA [NM_175440]	GO:0006508|GO:0005576|GO:0004252|GO:0016787|GO:0008150|GO:0003674|GO:0008236|GO:0008233|GO:0005575|GO:0003824	NM_175440	Mm.133083	213171	ENSMUST00000059482	TC1590360
A_52_P410685	0.0250729	1.61543	down	3022.61	5070.93	5.35525	6.04716	2747.05	2306.31	2408.17	3844.93	3136.9	3692.31	4814	5226.11	5172.66	5.15062	4.95084	5.09464	5.89448	5.84496	5.19593	6.01121	6.0755	6.05477	NM_033073	chr15:101253718-101253777	Krt7	Mus musculus keratin 7 (Krt7), mRNA [NM_033073]	GO:0045095|GO:0005515|GO:0005882|GO:0005198	NM_033073	Mm.289377	110310	ENSMUST00000068904	TC1576676
A_51_P130028	0.0109725	1.57079	up	641.525	425.083	3.11886	2.46737	554.039	706.962	459.538	645.899	615.852	866.861	471.831	407.124	396.292	2.8408	3.24496	2.70496	3.32091	3.49627	3.10528	2.66031	2.39331	2.3485	NM_013509	chr6:124710604-124710545	Eno2	Mus musculus enolase 2, gamma neuronal (Eno2), mRNA [NM_013509]	GO:0001917|GO:0004634|GO:0000287|GO:0046982|GO:0043204|GO:0005886|GO:0005626|GO:0006094|GO:0043025|GO:0000015|GO:0042803|GO:0016829|GO:0046872|GO:0016020|GO:0006096|GO:0005737|GO:0019717|GO:0005625|GO:0005622	NM_013509	Mm.3913	13807	ENSMUST00000072856	TC1619835
A_51_P394383	0.093817	1.5804	up	356.039	235.412	2.23765	1.57736	481.302	473.594	402.206	229.809	272.581	276.741	276.419	268.899	160.919	2.63775	2.66698	2.51271	1.83003	2.32038	1.45802	1.8889	1.7949	1.04828	NR_002847	chr19:5800585-5800526	Malat1	Mus musculus metastasis associated lung adenocarcinoma transcript 1 (non-coding RNA) (Malat1), non-coding RNA [NR_002847]	GO:0008150|GO:0003674|GO:0005575	NR_002847	Mm.298256	72289		TC1663969
A_51_P246066	0.0291797	1.53965	down	272.882	440.271	1.89635	2.51895	255.611	213.697	234.216	325.551	290.234	317.984	398.399	461.498	460.918	1.72476	1.5189	1.73261	2.33248	2.41091	1.65844	2.41626	2.57416	2.56645	NM_029612	chr1:174408455-174408514	Slamf9	Mus musculus SLAM family member 9 (Slamf9), mRNA [NM_029612]	GO:0016020|GO:0008150|GO:0003674|GO:0016021|GO:0005575	NM_029612	Mm.150050	98365	ENSMUST00000027830	TC1585704
A_52_P354509	0.0397567	1.57625	down	69.0217	109.08	-0.15373	0.502764	93.8801	80.4313	84.3806	46.9644	34.359	74.1149	124.071	100.988	102.181	0.279704	0.109155	0.259759	-0.460762	-0.667552	-0.442682	0.733213	0.382018	0.39306	NM_144810	chr1:134200328-134200387	Klhdc8a	Mus musculus kelch domain containing 8A (Klhdc8a), mRNA [NM_144810]	GO:0008150|GO:0003674|GO:0005575	NM_144810	Mm.39723	213417	ENSMUST00000046071	TC1607019
A_51_P224311	0.00781076	1.70038	up	1133.02	720.079	3.95424	3.18838	1199.19	1226.74	961.816	958.779	1064.24	1387.38	979.331	613.018	567.889	3.9548	4.04008	3.77054	3.8908	4.28543	3.78378	3.71384	2.98377	2.86755	NM_022318	chr16:38378016-38378075	Popdc2	Mus musculus popeye domain containing 2 (Popdc2), transcript variant 2, mRNA [NM_022318]	GO:0016020|GO:0008150|GO:0003674|GO:0016021	NM_022318	Mm.390856	64082	ENSMUST00000023494	TC1581186
A_51_P496769	0.00118744	1.76331	down	257.724	483.439	1.82633	2.64461	272.834	234.083	243.611	268.836	236.196	290.783	396.06	528.316	525.94	1.81883	1.65035	1.78935	2.05632	2.11367	1.52942	2.40776	2.76924	2.75684	NM_025630	chr13:96121424-96121365	Aggf1	Mus musculus angiogenic factor with G patch and FHA domains 1 (Aggf1), mRNA [NM_025630]	GO:0003676|GO:0005576|GO:0008150|GO:0003674|GO:0007275|GO:0030154|GO:0005737|GO:0001525|GO:0005575|GO:0005622	NM_025630	Mm.36785	66549	ENSMUST00000022189	TC1576684
A_52_P512561	0.00930424	1.70554	down	49.1358	89.5623	-0.575508	0.194718	55.0362	42.2724	39.9636	57.3368	44.0522	56.1535	65.4848	97.1866	106.015	-0.490734	-0.818887	-0.818466	-0.172868	-0.309024	-0.84307	-0.188727	0.326665	0.446215	NM_025863	chr3:68841047-68840988	Trim59	Mus musculus tripartite motif-containing 59 (Trim59), mRNA [NM_025863]	GO:0005515|GO:0046872|GO:0016020|GO:0008150|GO:0003674|GO:0008270|GO:0016021|GO:0005575|GO:0005622	NM_025863	Mm.176695	66949	ENSMUST00000136512	TC1575209
A_51_P498293	0.0832815	1.90115	down	152.135	280.183	0.934822	1.8617	94.5463	94.3294	82.077	239.067	184.542	218.247	238.244	298.036	304.269	0.289907	0.339105	0.219824	1.88701	1.75764	1.11545	1.67448	1.94332	1.96729	NM_029007	chr12:14154972-14154913	Fam84a	Mus musculus family with sequence similarity 84, member A (Fam84a), mRNA [NM_029007]		NM_029007	Mm.227253	105005	ENSMUST00000020926	NP1218017
A_51_P184484	2.60416e-06	9.10271	down	73.7117	706.811	0.00846108	3.19476	96.9494	69.7841	75.5132	59.3509	74.0473	66.6255	607.739	696.373	816.322	0.326117	-0.0957036	0.099576	-0.123059	0.440207	-0.596371	3.02549	3.1677	3.39108	NM_008607	chr9:7282762-7282821	Mmp13	Mus musculus matrix metallopeptidase 13 (Mmp13), mRNA [NM_008607]	GO:0051216|GO:0048306|GO:0008233|GO:0005578|GO:0006508|GO:0031623|GO:0046872|GO:0008152|GO:0008270|GO:0030574|GO:0008237|GO:0001968|GO:0005794|GO:0043171|GO:0005576|GO:0046581|GO:0005615|GO:0004222|GO:0030282|GO:0005509|GO:0005764|GO:0016787|GO:0050750|GO:0005583|GO:0031012	NM_008607	Mm.5022	17386	ENSMUST00000015394	TC1577492
A_52_P469009	0.0950784	1.64921	down	1393.43	2250.68	4.15077	4.87254	2137.26	1731.15	1865.49	931.222	733.918	961.542	2040.91	2284.18	2426.95	4.7885	4.53699	4.72625	3.84872	3.74931	3.25483	4.77318	4.88144	4.96301	AY182513	chr12:115298102-115298043		Mus musculus clone BaFL-P40 immunoglobulin heavy chain variable region mRNA, partial cds. [AY182513]			Mm.425779
A_51_P361022	0.0198577	1.67361	down	5682.33	9797.64	6.25528	6.99825	4620.95	3968.22	5079.6	6953.23	5701.64	7770.34	9875.68	9840.3	9676.95	5.90093	5.73375	6.17142	6.74921	6.70699	6.26939	7.04785	6.98847	6.95842	NM_023223	chr4:118105595-118105536	Cdc20	Mus musculus cell division cycle 20 homolog (S. cerevisiae) (Cdc20), mRNA [NM_023223]	GO:0005515|GO:0007067|GO:0048471|GO:0043234|GO:0051301|GO:0007049|GO:0005813|GO:0050773|GO:0008284	NM_023223	Mm.289747	107995	ENSMUST00000050059	TC1765009
A_52_P973575	0.041038	1.595	down	531.815	874.965	2.83564	3.5092	392.611	437.774	414.988	692.044	551.845	701.626	809.702	850.591	964.602	2.34391	2.55351	2.55784	3.42046	3.33795	2.80018	3.43943	3.4563	3.63187	NM_008270	chr11:96137748-96137807	Hoxb9	Mus musculus homeobox B9 (Hoxb9), mRNA [NM_008270]	GO:0003700|GO:0006350|GO:0007275|GO:0045944|GO:0006355|GO:0045449|GO:0030528|GO:0005634|GO:0016563|GO:0043565|GO:0003677|GO:0048706|GO:0030879|GO:0009952	NM_008270	Mm.258271	15417	ENSMUST00000000010	TC1687897
A_51_P465161	0.0021523	1.55534	up	133.941	90.7304	0.878574	0.24134	138.9	125.531	141.435	145.112	107.013	145.657	84.0462	96.2095	91.9356	0.844862	0.751371	1.00491	1.16677	0.971476	0.532056	0.171297	0.312087	0.240635	NM_026152	chr19:42144788-42144847	Dhdpsl	Mus musculus dihydrodipicolinate synthase-like, mitochondrial (Dhdpsl), nuclear gene encoding mitochondrial protein, mRNA [NM_026152]	GO:0016829|GO:0008150|GO:0003674|GO:0008152|GO:0005739|GO:0003824	NM_026152	Mm.24196	67432	ENSMUST00000081714	TC1581960
A_51_P114941	0.0228263	1.53135	up	3444.42	2311.23	5.52336	4.90855	3933.53	4809.65	3728.81	2592.52	2192.23	3409.76	2284.49	2581.94	2067.27	5.66857	6.01119	5.72542	5.32588	5.32801	5.08108	4.93584	5.05822	4.73159	NM_007819	chr5:138335377-138335318	Cyp3a13	Mus musculus cytochrome P450, family 3, subfamily a, polypeptide 13 (Cyp3a13), mRNA [NM_007819]	GO:0005792|GO:0005506|GO:0009055|GO:0046872|GO:0016020|GO:0020037|GO:0016712|GO:0016491|GO:0004497|GO:0070330|GO:0005783|GO:0055114	NM_007819	Mm.289886	13113		TC1585038
A_51_P339843	0.00145928	4.59496	down	131.455	572.14	0.698906	2.89896	218.142	177.814	168.609	79.5148	60.0718	84.5796	558.309	550.939	607.172	1.49608	1.2537	1.25845	0.298893	0.138449	-0.252136	2.9031	2.82973	2.96404	NM_008571	chr14:56662265-56662324	Mcpt2	Mus musculus mast cell protease 2 (Mcpt2), mRNA [NM_008571]	GO:0006508|GO:0004252|GO:0016787|GO:0008236|GO:0008233|GO:0003824|GO:0005622	NM_008571	Mm.4409	17225	ENSMUST00000015576	TC1583216
A_51_P282760	5.08474e-06	3.73451	up	2016.07	567.672	4.78147	2.88055	2442.07	2074.69	2206.12	1828.71	1482.13	2062.72	545.172	652.69	505.152	4.98085	4.79815	4.96821	4.82235	4.76329	4.35596	2.86875	3.07423	2.69866	NM_011066	chr1:93313105-93313046	Per2	Mus musculus period homolog 2 (Drosophila) (Per2), mRNA [NM_011066]	GO:0005634|GO:0005515|GO:0006350|GO:0010553|GO:0048511|GO:0005737|GO:0007623|GO:0004871|GO:0007165|GO:0006355|GO:0045449	NM_011066	Mm.218141	18627	ENSMUST00000069620	TC1579956
A_51_P240453	0.0130183	1.76581	down	657.346	1204.11	3.15181	3.97214	565.913	491.651	542.708	831.369	686.529	825.908	1127.43	1217.09	1267.82	2.87139	2.72096	2.94495	3.68509	3.65301	3.03546	3.91701	3.97319	4.02621	NM_133851	chr2:119475072-119475131	Nusap1	Mus musculus nucleolar and spindle associated protein 1 (Nusap1), transcript variant 1, mRNA [NM_133851]	GO:0007067|GO:0005874|GO:0051301|GO:0007049|GO:0005730|GO:0000281|GO:0000070|GO:0005634|GO:0008017|GO:0005876|GO:0007076|GO:0045840|GO:0040001|GO:0003677|GO:0005737|GO:0005856	NM_133851	Mm.290015	108907	ENSMUST00000068225	TC1574429
A_52_P604613	0.0521039	1.83946	down	49.1416	93.8733	-0.641612	0.237668	38.8698	31.1962	32.3957	64.7537	52.2184	75.416	60.19	111.681	109.748	-0.992466	-1.25723	-1.12135	0.00263405	-0.0636821	-0.417576	-0.310363	0.527226	0.49614	NM_010333	chr9:20770788-20770729	S1pr2	Mus musculus sphingosine-1-phosphate receptor 2 (S1pr2), mRNA [NM_010333]	GO:0004872|GO:0016020|GO:0004930|GO:0005886|GO:0007186|GO:0004871|GO:0007610|GO:0016021|GO:0007165|GO:0001619	NM_010333	Mm.46493	14739	ENSMUST00000054197	TC1575097
A_51_P166886	0.00224836	1.57205	up	52011.2	35032.9	9.48479	8.83214	53461.2	50227.2	50348.5	54402.5	46482.6	57145.2	33010.1	38953.1	33135.6	9.43316	9.39565	9.48058	9.71713	9.73424	9.14797	8.78881	8.97343	8.73418	NM_011314	chr7:54009535-54009594	Saa2	Mus musculus serum amyloid A 2 (Saa2), mRNA [NM_011314]	GO:0005576|GO:0005515|GO:0006953|GO:0034364	NM_011314	Mm.200941	20209	ENSMUST00000075982	TC1594420
A_51_P475938	0.00186197	1.75682	down	463.328	848.693	2.65487	3.46784	348.754	498.575	438.413	433.733	437.427	623.066	900.946	825.124	820.009	2.17302	2.74114	2.63707	2.7464	3.00273	2.62887	3.59348	3.41245	3.39758	NM_146004	chr11:68371642-68371701	Mfsd6l	Mus musculus major facilitator superfamily domain containing 6-like (Mfsd6l), mRNA [NM_146004]	GO:0016020|GO:0008150|GO:0003674|GO:0055085|GO:0016021|GO:0005575	NM_146004	Mm.131205	215723	ENSMUST00000053211	TC1587946
A_52_P35801	0.00190041	1.63632	down	3595.25	6193.91	5.6259	6.33635	3835.31	3249.52	3435.34	4043.1	3078.41	3929.83	6052.09	6145.72	6383.93	5.63208	5.44548	5.60716	5.96699	5.8178	5.28588	6.3414	6.30935	6.35831	NM_010807	chr4:129192745-129192804	Marcksl1	Mus musculus MARCKS-like 1 (Marcksl1), mRNA [NM_010807]	GO:0016192|GO:0005516|GO:0008284	NM_010807	Mm.424974	17357	ENSMUST00000062356	TC1573228
A_51_P506417	0.00713059	3.81403	down	853.995	3012.91	3.3657	5.29702	476.483	395.109	478.241	1258.73	1027.36	1488.05	3003.86	3025.58	3009.28	2.62324	2.40558	2.76251	4.28349	4.23456	3.88483	5.33079	5.28697	5.27329	NM_016958	chr11:100065288-100064683	Krt14	Mus musculus keratin 14 (Krt14), mRNA [NM_016958]	GO:0045095|GO:0005634|GO:0005515|GO:0005882|GO:0005737|GO:0005198	NM_016958	Mm.439898	16664	ENSMUST00000007272	TC1575861
A_51_P311038	0.0547132	1.65726	up	1660.23	1032.67	4.4665	3.7377	1364.4	1019.46	1439.79	2227.29	1749.17	2161.24	874.629	1231.21	992.179	4.14101	3.77306	4.35256	5.10682	5.00229	4.42327	3.55071	3.98984	3.67254	NM_001024139	chr9:30707092-30707033	Adamts15	Mus musculus a disintegrin-like and metallopeptidase (reprolysin type) with thrombospondin type 1 motif, 15 (Adamts15), mRNA [NM_001024139]	GO:0005576|GO:0008150|GO:0004222|GO:0008233|GO:0005578|GO:0006508|GO:0016787|GO:0003674|GO:0046872|GO:0008270|GO:0031012|GO:0008237|GO:0005575	NM_001024139	Mm.65867	235130	ENSMUST00000065112
A_52_P30989	0.00185044	1.72643	down	322.047	583.312	2.14026	2.92805	310.455	260.495	324.916	360.942	289.778	385.696	586.42	571.642	591.872	2.0052	1.80458	2.20484	2.48136	2.40864	1.93695	2.97398	2.88295	2.92723	NM_028222	chr14:47386895-47386954	Cdkn3	Mus musculus cyclin-dependent kinase inhibitor 3 (Cdkn3), mRNA [NM_028222]	GO:0004722|GO:0016301|GO:0004725|GO:0007050|GO:0005575	NM_028222	Mm.272394	72391	ENSMUST00000067426	TC1583124
A_51_P325862	0.0355035	1.83645	up	53.3932	30.7742	-0.502486	-1.37941	47.5456	39.7153	37.5721	45.8779	64.3581	85.2902	43.0875	28.2004	21.0346	-0.701803	-0.908908	-0.907489	-0.49453	0.237881	-0.240066	-0.792617	-1.45838	-1.88722	NM_013751	chr16:29230423-29230482	Hrasls	Mus musculus HRAS-like suppressor (Hrasls), mRNA [NM_013751]	GO:0005641|GO:0003674|GO:0005737|GO:0007265|GO:0001558	NM_013751	Mm.103650	27281	ENSMUST00000089824	TC1582436
A_51_P126476	0.00796533	1.59614	down	995.502	1662.19	3.762	4.43658	1033.99	792.733	843.149	1182.69	910.534	1209.92	1535.48	1689.3	1761.79	3.74096	3.41016	3.58056	4.1936	4.0604	3.58632	4.36266	4.44619	4.50091	NM_010863	chr1:51807052-51806993	Myo1b	Mus musculus myosin IB (Myo1b), transcript variant 2, mRNA [NM_010863]	GO:0008150|GO:0003674|GO:0005524|GO:0016459|GO:0005516|GO:0003779|GO:0003774|GO:0000166|GO:0005903	NM_010863	Mm.3390	17912	ENSMUST00000018561	TC1574191
A_51_P513573	0.069374	1.59135	down	2117.13	3281.76	4.74983	5.42007	2282.16	3331.19	2568.3	1232.81	990.495	2297.84	3193.82	3319	3332.45	4.88314	5.48129	5.18752	4.25348	4.18184	4.51169	5.41926	5.42051	5.42045	NM_145603	chr8:107375621-107375942	Ces2	Mus musculus carboxylesterase 2 (Ces2), mRNA [NM_145603]	GO:0016787|GO:0003674|GO:0051789|GO:0005575|GO:0001101	NM_145603	Mm.28191	234671	ENSMUST00000043209	TC1577912
A_52_P607128	6.73862e-05	1.87597	down	82.3005	163.444	0.177282	1.08492	86.8477	81.0409	77.1094	79.9931	71.3335	97.4782	140.088	176.631	173.613	0.167373	0.120049	0.129753	0.307547	0.38634	-0.0473661	0.90837	1.18857	1.15782	NM_031195	chr8:40689217-40689158	Msr1	Mus musculus macrophage scavenger receptor 1 (Msr1), transcript variant 1, mRNA [NM_031195]	GO:0005044|GO:0004872|GO:0005515|GO:0006897|GO:0005886|GO:0010744|GO:0030169|GO:0042953|GO:0034362|GO:0034381|GO:0010886|GO:0031410|GO:0016020|GO:0005829|GO:0030301|GO:0006898|GO:0016021	NM_031195	Mm.239291	20288		TC1577205
A_52_P194971	0.00166916	3.49531	down	209.404	708.908	1.40176	3.20718	101.116	158.419	171.963	237.113	188.342	399.472	654.207	723.379	749.136	0.38683	1.08707	1.28687	1.87517	1.78704	1.98758	3.13179	3.22259	3.26717	NM_010460	chr11:96151211-96151270	Hoxb7	Mus musculus homeobox B7 (Hoxb7), mRNA [NM_010460]	GO:0005515|GO:0003700|GO:0006350|GO:0007275|GO:0030099|GO:0006355|GO:0045449|GO:0030528|GO:0005634|GO:0043565|GO:0048704|GO:0003677|GO:0009952	NM_010460	Mm.390366	15415	ENSMUST00000049352	TC1585082
A_52_P367745	0.0410404	1.52403	down	2288.45	3552.55	4.92612	5.53402	2975.82	2810.47	2816.64	1658.49	1434.96	2034.31	3577.36	3406.07	3674.23	5.26603	5.23606	5.32068	4.6814	4.71663	4.33595	5.58287	5.45787	5.56131	NM_007383	chr5:115560946-115560887	Acads	Mus musculus acyl-Coenzyme A dehydrogenase, short chain (Acads), nuclear gene encoding mitochondrial protein, mRNA [NM_007383]	GO:0006629|GO:0008152|GO:0006631|GO:0004085|GO:0005739|GO:0000062|GO:0016491|GO:0016627|GO:0055114|GO:0050660|GO:0003995	NM_007383	Mm.18759	11409	ENSMUST00000150291	TC1771810
A_52_P54849	0.00687237	1.62245	up	155.185	97.7792	1.03821	0.340043	192.587	173.952	167.487	106.472	90.7384	199.875	108.268	104.029	81.0409	1.31632	1.22201	1.24883	0.720072	0.733473	0.98858	0.53665	0.424817	0.0586624	NM_145527	chr2:91018186-91018127	Madd	Mus musculus MAP-kinase activating death domain (Madd), transcript variant 9, mRNA [NM_145527]	GO:0000187|GO:0051726|GO:0016020|GO:0005085|GO:0042981|GO:0006915|GO:0016021|GO:0017112	NM_145527	Mm.36410	228355	ENSMUST00000111367	NP318038
A_52_P302587	0.000211512	2.07711	down	112.916	239.707	0.5904	1.64498	131.395	141.155	118.496	83.5306	67.8663	135.054	233.778	243.849	241.493	0.764726	0.920611	0.749612	0.369974	0.314456	0.423023	1.64718	1.65383	1.63392	NM_023543	chr6:54251148-54251207	Chn2	Mus musculus chimerin (chimaerin) 2 (Chn2), transcript variant 1, mRNA [NM_023543]	GO:0030675|GO:0046872|GO:0016020|GO:0008150|GO:0019717|GO:0005096|GO:0007165|GO:0005622	NM_023543	Mm.321147	69993	ENSMUST00000067741	TC1632473
A_51_P157270	0.0542407	1.59574	up	180.732	119.58	1.28289	0.608668	170.245	126.75	139.15	226.209	191.051	230.988	85.4886	137.714	135.539	1.13843	0.765313	0.981412	1.80725	1.80765	1.1973	0.195845	0.829512	0.800645	NM_001177503	chr12:81825086-81825145	3830431G21Rik	Mus musculus RIKEN cDNA 3830431G21 gene (3830431G21Rik), mRNA [NM_001177503]	GO:0008150|GO:0003674|GO:0005575	NM_001177503	Mm.154541	217682	ENSMUST00000085244	TC1605019
A_51_P238354	0.0211177	1.51655	down	137.251	223.422	0.917296	1.51809	161.337	135.895	127.251	137.269	126.546	135.209	166.987	251.683	251.597	1.06089	0.865814	0.852448	1.0866	1.21336	0.424669	1.16178	1.69944	1.69305	NM_019549	chr11:16872051-16871992	Plek	Mus musculus pleckstrin (Plek), mRNA [NM_019549]	GO:0033625|GO:0010572|GO:0070527|GO:0070560|GO:0070493|GO:0006904|GO:0070528|GO:0030836	NM_019549	Mm.98232	56193	ENSMUST00000020321	TC1577626
A_51_P482571	0.0616731	1.58029	down	419.69	662.524	2.4509	3.11109	316.515	285.534	290.073	508.896	407.6	709.524	692.207	638.04	657.324	2.03309	1.93699	2.04119	2.97697	2.90084	2.81633	3.21325	3.04148	3.07855	M89800	chr1:74831361-74831426	Wnt6	Mouse Wnt-6 mRNA, complete cds. [M89800]	GO:0005576|GO:0005515|GO:0009887|GO:0007275|GO:0007223|GO:0007267|GO:0004871|GO:0016055|GO:0007165|GO:0005578|GO:0005102		Mm.268282	22420
A_52_P1196325	0.089319	1.73648	up	54.9535	30.0549	-0.55677	-1.35294	79.3783	77.8608	73.7448	30.6917	22.2565	45.7891	27.637	31.8108	30.717	0.0376291	0.0622954	0.0653892	-1.07448	-1.29401	-1.13744	-1.43328	-1.28458	-1.34095	AK051621	chr2:48695371-48695430		Mus musculus 12 days embryo spinal ganglion cDNA, RIKEN full-length enriched library, clone:D130060K07 product:unclassifiable, full insert sequence. [AK051621]			Mm.445770
A_52_P127465	0.00045868	1.71313	down	53.0216	92.2227	-0.509912	0.266724	48.5419	48.7647	43.583	51.2868	36.6699	89.2836	91.2078	90.1754	95.285	-0.671884	-0.612765	-0.693388	-0.333744	-0.573643	-0.174051	0.289271	0.218641	0.292261	NM_023249	chr16:17078030-17078089	Ypel1	Mus musculus yippee-like 1 (Drosophila) (Ypel1), mRNA [NM_023249]	GO:0005634|GO:0008150|GO:0003674|GO:0005575	NM_023249	Mm.237941	106369	ENSMUST00000115729	TC1638845
A_51_P301566	0.0159451	2.80318	down	2170.83	5752.02	4.74264	6.2297	1228.2	1369.63	1078.82	3153.12	2547.01	3648.21	5828.52	5605.85	5821.69	3.98929	4.19904	3.93616	5.6083	5.54442	5.1786	6.2871	6.1767	6.2253	NM_008872	chr8:23893092-23893152	Plat	Mus musculus plasminogen activator, tissue (Plat), mRNA [NM_008872]	GO:0004252|GO:0005576|GO:0008236|GO:0005615|GO:0030141|GO:0008233|GO:0035249|GO:0003824|GO:0006508|GO:0016787|GO:0048008|GO:0001666|GO:0014909|GO:0045202|GO:0005737|GO:0045177	NM_008872	Mm.154660	18791	ENSMUST00000033941	TC1572057
A_51_P211436	1.16563e-07	2.54109	up	254.661	104.583	1.79289	0.447446	271.249	244.397	227.605	247.02	196.678	341.016	104.632	109.657	99.4608	1.81043	1.71255	1.69131	1.93422	1.84953	1.75932	0.48737	0.500827	0.35414	NM_010287	chr9:14673600-14673659	Gpr83	Mus musculus G protein-coupled receptor 83 (Gpr83), mRNA [NM_010287]	GO:0004872|GO:0016020|GO:0004930|GO:0005886|GO:0051384|GO:0007186|GO:0004871|GO:0016021|GO:0007165|GO:0004983	NM_010287	Mm.4672	14608	ENSMUST00000115626	TC1592598
A_51_P454008	0.0333396	1.66705	down	249.469	425.011	1.73401	2.47131	178.871	195.294	191.873	321.894	259.878	349.006	424.352	418.24	432.443	1.20973	1.38898	1.44492	2.31618	2.25152	1.79273	2.5073	2.43217	2.47445	NM_008489	chr2:158154142-158157684	Lbp	Mus musculus lipopolysaccharide binding protein (Lbp), mRNA [NM_008489]	GO:0050829|GO:0001530|GO:0006869|GO:0006953|GO:0051637|GO:0032722|GO:0006810|GO:0042535|GO:0002232|GO:0008228|GO:0042742|GO:0050830|GO:0005576|GO:0005615|GO:0002281|GO:0032760|GO:0044130|GO:0071223|GO:0008289|GO:0032496|GO:0070891|GO:0005102|GO:0045087|GO:0060265|GO:0090023	NM_008489	Mm.218846	16803	ENSMUST00000016168	TC1575413
A_51_P421418	0.0146139	2.19079	up	156.487	71.0797	1.01909	-0.112362	94.3552	143.772	92.9321	204.974	158.348	244.543	75.7112	73.5236	64.0042	0.286987	0.94711	0.399024	1.66504	1.53679	1.27957	0.0206208	-0.0758858	-0.281821	NM_008293	chr3:98656389-98656330	Hsd3b1	Mus musculus hydroxy-delta-5-steroid dehydrogenase, 3 beta- and steroid delta-isomerase 1 (Hsd3b1), mRNA [NM_008293]	GO:0006694|GO:0005488|GO:0005739|GO:0016853|GO:0016491|GO:0003824|GO:0016020|GO:0008152|GO:0004769|GO:0016021|GO:0003854|GO:0005783|GO:0055114	NM_008293	Mm.140811	15492	ENSMUST00000107016	TC1578530
A_51_P474459	0.000139806	2.05968	down	1821.04	3949.08	4.64229	5.6847	1755.1	1833.76	1517.82	1922.93	1689.55	2207.1	3614.54	4095.83	4136.87	4.50429	4.62006	4.4287	4.89484	4.95226	4.45356	5.59778	5.72392	5.73241	NM_007707	chr11:117827539-117827480	Socs3	Mus musculus suppressor of cytokine signaling 3 (Socs3), mRNA [NM_007707]	GO:0001932|GO:0005515|GO:0007243|GO:0045597|GO:0007165|GO:0046627|GO:0009968|GO:0060674|GO:0060707|GO:0060670|GO:0005737|GO:0040008|GO:0007259|GO:0045595|GO:0060708	NM_007707	Mm.3468	12702	ENSMUST00000054002	TC1768013
A_52_P368057	0.0088843	1.59931	down	40.6311	68.8439	-0.841116	-0.163671	35.1434	45.6137	36.1272	42.8037	39.6987	44.4001	58.6559	71.2192	76.6567	-1.13786	-0.709136	-0.964069	-0.594595	-0.459149	-1.18188	-0.34761	-0.121826	-0.0215754	NM_011990	chr3:50169759-50169700	Slc7a11	Mus musculus solute carrier family 7 (cationic amino acid transporter, y+ system), member 11 (Slc7a11), mRNA [NM_011990]	GO:0005792|GO:0016020|GO:0005886|GO:0005791|GO:0055085|GO:0005856|GO:0015171|GO:0006865|GO:0016021|GO:0006810	NM_011990	Mm.260988	26570	ENSMUST00000029297	TC1608522
A_51_P425284	0.0369681	1.67314	up	144.131	86.2091	0.910362	0.167806	96.5343	120.864	96.6319	173.954	133.318	243.486	87.4579	91.0577	80.1118	0.319926	0.696713	0.455347	1.42831	1.28856	1.27332	0.228702	0.232688	0.0420275	AK039267	chr11:78141189-78141248	Aldoc	aldolase C, fructose-bisphosphate Gene [Source:MGI Symbol;Acc:MGI:101863] [ENSMUST00000017534]	GO:0007568|GO:0005515|GO:0005739|GO:0030424|GO:0051289|GO:0003824|GO:0051290|GO:0016829|GO:0008152|GO:0006096|GO:0005737|GO:0004332|GO:0006915		Mm.7729	11676	ENSMUST00000017534	TC1598470
A_51_P433037	0.013477	1.5864	up	52.7793	34.8978	-0.488967	-1.15473	44.028	47.4671	44.4717	65.1396	43.0451	72.5241	27.2295	40.32	37.1438	-0.812694	-0.651673	-0.664265	0.0112057	-0.34239	-0.473986	-1.45471	-0.942596	-1.06687	AK035641	chr3:95282578-95282637		Mus musculus adult male urinary bladder cDNA, RIKEN full-length enriched library, clone:9530080H02 product:unclassifiable, full insert sequence. [AK035641]
A_51_P362429	0.004769	1.83578	up	11229.4	6535.61	7.2598	6.38341	10378.1	11979.4	8666.12	10881.3	11126.5	14345.2	8435.73	5982	5189.1	7.06821	7.32773	6.94209	7.3953	7.67154	7.15391	6.82048	6.27039	6.05935	NM_013607	chr16:14198147-14195223	Myh11	Mus musculus myosin, heavy polypeptide 11, smooth muscle (Myh11), transcript variant 1, mRNA [NM_013607]	GO:0005859|GO:0006939|GO:0032982|GO:0005524|GO:0016459|GO:0005516|GO:0005737|GO:0030485|GO:0003779|GO:0003774|GO:0001725|GO:0000166	NM_013607	Mm.250705	17880	ENSMUST00000077248	TC1669089
A_52_P42380	0.00171726	1.56184	down	557.376	918.403	2.93516	3.5784	639.787	563.143	570.42	548.749	441.343	580.817	817.346	953.618	984.245	3.04841	2.91683	3.0168	3.08574	3.01559	2.52757	3.45299	3.62125	3.66096	NM_201359	chr15:97799407-97799466	Tmem106c	Mus musculus transmembrane protein 106C (Tmem106c), mRNA [NM_201359]	GO:0016020|GO:0008150|GO:0003674|GO:0016021|GO:0005575|GO:0005783	NM_201359	Mm.196630	380967	ENSMUST00000064200	TC1579107
A_52_P117294	0.0054466	1.55709	up	283.226	191.964	1.94908	1.31024	329.093	325.086	295.713	259.322	203.632	286.511	155.008	213.438	207.445	2.08931	2.12415	2.06897	2.00434	1.89965	1.50807	1.05438	1.46165	1.41467	NM_177136	chr5:73491106-73491047	Fryl	Mus musculus furry homolog-like (Drosophila) (Fryl), transcript variant 2, mRNA [NM_177136]	GO:0005515|GO:0008150|GO:0005575	NM_177136	Mm.478281	72313	ENSMUST00000042514	TC1589574
A_51_P246317	0.0910778	1.51513	up	55378.5	37287.6	9.52545	8.92601	41345	46005.7	36859.9	74339.3	61276	72444.9	36770.3	38643.8	36448.6	9.06238	9.26899	9.03068	10.1676	10.1329	9.49022	8.94444	8.96193	8.87166	NM_008630	chr8:96697371-96697430	Mt2	Mus musculus metallothionein 2 (Mt2), mRNA [NM_008630]	GO:0010273|GO:0046872|GO:0006882|GO:0007263|GO:0008270	NM_008630	Mm.147226	17750	ENSMUST00000034214	TC1574059
A_51_P287546	0.00952398	1.68095	down	63.3966	112.018	-0.206248	0.543025	56.7781	60.4564	50.1182	74.9887	65.0264	73.0119	102.023	110.11	123.921	-0.445781	-0.302706	-0.491817	0.214344	0.252785	-0.464314	0.450931	0.506785	0.671358	AK017782	chr15:076422059-076422118	5730521K06Rik	Mus musculus 8 days embryo whole body cDNA, RIKEN full-length enriched library, clone:5730521K06 product:unclassifiable, full insert sequence. [AK017782]	GO:0008150|GO:0003674|GO:0005575		Mm.181624	70639		TC1707041
A_51_P490456	0.000755882	3.38461	down	793.999	2508.16	3.27313	5.03212	508.097	848.738	784.827	466.69	433.377	1722.27	2487.98	2450.22	2586.27	2.71592	3.50865	3.47715	2.85206	2.98931	4.09572	5.05895	4.98268	5.05474	NM_178373	chr6:113374752-113374693	Cidec	Mus musculus cell death-inducing DFFA-like effector c (Cidec), mRNA [NM_178373]	GO:0005515|GO:0005829|GO:0005737|GO:0006917|GO:0006915|GO:0005622	NM_178373	Mm.10026	14311	ENSMUST00000032416	TC1580634
A_51_P275101	0.00219546	2.07491	down	127.942	275.29	0.78754	1.84059	113.108	105.997	93.683	153.667	127.197	174.003	246.348	295.112	284.412	0.548509	0.507345	0.410634	1.24941	1.22075	0.788595	1.72274	1.9291	1.86992	NM_021439	chr10:82658397-82658456	Chst11	Mus musculus carbohydrate sulfotransferase 11 (Chst11), mRNA [NM_021439]	GO:0051216|GO:0035121|GO:0047756|GO:0042733|GO:0033037|GO:0030512|GO:0016740|GO:0043066|GO:0005975|GO:0008146|GO:0048589|GO:0002063|GO:0030206|GO:0042127|GO:0030204|GO:0009791|GO:0048704|GO:0016020|GO:0016051|GO:0030326|GO:0007585|GO:0016021|GO:0048703|GO:0005794	NM_021439	Mm.360747	58250	ENSMUST00000040110	TC1584550
A_52_P30984	0.0736564	1.90105	down	234.948	443.969	1.57799	2.50478	140.921	130.611	168.417	348.097	268.035	353.605	324.016	507.294	500.597	0.865697	0.808597	1.25682	2.42909	2.29611	1.81162	2.11811	2.71066	2.68559	NM_028222	chr14:47389608-47391131	Cdkn3	Mus musculus cyclin-dependent kinase inhibitor 3 (Cdkn3), mRNA [NM_028222]	GO:0004722|GO:0016301|GO:0004725|GO:0007050|GO:0005575	NM_028222	Mm.272394	72391	ENSMUST00000067426	TC1583124
A_51_P269375	0.00301479	2.19103	up	610.588	289.537	3.03336	1.90175	513.767	519.477	438.541	592.862	688.439	910.44	340.696	291.389	236.526	2.73193	2.80039	2.63749	3.1973	3.65702	3.17605	2.19053	1.91078	1.60394	NM_031158	chr8:24260740-24260799	Ank1	Mus musculus ankyrin 1, erythroid (Ank1), transcript variant 2, mRNA [NM_031158]	GO:0005515|GO:0015672|GO:0005886|GO:0030018|GO:0030863|GO:0030673|GO:0007165|GO:0016529|GO:0005634|GO:0016020|GO:0006779|GO:0005737|GO:0005856|GO:0019717|GO:0031430|GO:0048821	NM_031158	Mm.334444	11733	ENSMUST00000110685	TC1576228
A_51_P373142	0.00225905	1.85499	up	5319.77	3014.2	6.18679	5.29538	6483.75	4815.37	5754.67	5515.74	4401.62	4947.45	2828.95	3239.02	2974.63	6.38957	6.0129	6.35144	6.41508	6.33365	5.6181	5.24423	5.38532	5.25658	NR_027236	chr6:48583621-48583680	AI854703	Mus musculus expressed sequence AI854703 (AI854703), non-coding RNA [NR_027236]	GO:0008150|GO:0003674|GO:0005575	NR_027236	Mm.26678	243373	ENSMUST00000095938	TC1582949
A_51_P232207	0.0172899	2.67902	down	1099.91	2690.09	3.7118	5.1335	408.677	726.385	1068.7	1072.43	878.639	2444.66	2707.1	2687.36	2675.81	2.40177	3.28406	3.92256	4.05241	4.00896	4.60105	5.18072	5.11595	5.10384	NM_008269	chr11:96162563-96162622	Hoxb6	Mus musculus homeobox B6 (Hoxb6), mRNA [NM_008269]	GO:0003700|GO:0006350|GO:0007275|GO:0006355|GO:0045449|GO:0030528|GO:0005634|GO:0043565|GO:0048704|GO:0003677|GO:0034101|GO:0048706|GO:0009952	NM_008269	Mm.215	15414	ENSMUST00000000704	TC1586347
A_52_P317653	0.025233	2.33702	down	59037	122286	9.41399	10.6387	40169.6	96444	52913.1	25254	24448	114993	128209	115502	123149	9.02078	10.3369	9.55226	8.60996	8.80726	10.1568	10.7463	10.5415	10.6281	NM_009799	chr3:14767545-14767486	Car1	Mus musculus carbonic anhydrase 1 (Car1), transcript variant 1, mRNA [NM_009799]	GO:0016829|GO:0006730|GO:0046872|GO:0004089|GO:0005737|GO:0008270	NM_009799	Mm.273195	12346	ENSMUST00000094365	TC1574839
A_52_P916092	6.85442e-05	1.65626	up	86.7461	54.9264	0.24162	-0.486314	100.189	78.3566	84.7196	79.7192	67.8736	109.619	49.9772	53.0278	61.7743	0.37354	0.0714526	0.265543	0.302597	0.314612	0.121974	-0.578616	-0.547344	-0.332981	AK082362	chr17:65096544-65096603		Mus musculus 0 day neonate cerebellum cDNA, RIKEN full-length enriched library, clone:C230040I21 product:unclassifiable, full insert sequence. [AK082362]						TC1622808
A_51_P451275	0.0376121	1.57727	up	235.57	153.714	1.63903	0.981594	301.619	302.978	270.268	162.083	138.208	238.264	182.656	159.667	118.819	1.96354	2.02254	1.93917	1.32633	1.34053	1.24204	1.29117	1.0429	0.610704	NM_178723	chr2:77249736-77249677	Zfp385b	Mus musculus zinc finger protein 385B (Zfp385b), transcript variant 1, mRNA [NM_178723]	GO:0003676|GO:0005634|GO:0046872|GO:0008150|GO:0003674|GO:0008270|GO:0005575|GO:0005622	NM_178723	Mm.126649	241494	ENSMUST00000111831	TC1578988
A_52_P591017	0.0130921	1.54463	down	286.951	464.562	1.9706	2.59786	287.486	229.781	243.814	325.775	285.892	348.957	435.606	463.368	494.71	1.89431	1.62358	1.79055	2.33347	2.38916	1.79253	2.54507	2.57999	2.66852	NM_011627	chr9:85739295-85739354	Tpbg	Mus musculus trophoblast glycoprotein (Tpbg), transcript variant 1, mRNA [NM_011627]	GO:0005515|GO:0016020|GO:0005737|GO:0016021|GO:0005783	NM_011627	Mm.432513	21983	ENSMUST00000006559	TC1591161
A_51_P127358	0.0176132	1.68311	up	52.8276	32.2742	-0.546763	-1.2979	50.8938	48.5451	51.9316	37.0477	32.579	95.9681	44.84	25.4743	26.5084	-0.603626	-0.619278	-0.440539	-0.802946	-0.744297	-0.0698905	-0.735099	-1.60505	-1.55354	XM_204338	chrX:50994019-50994077	4933416I08Rik	PREDICTED: Mus musculus RIKEN cDNA 4933416I08 gene, transcript variant 1 (4933416I08Rik), mRNA [XM_204338]	GO:0008150|GO:0003674|GO:0005575	XM_204338	Mm.396063	71159		TC1591592
A_51_P345649	0.017865	1.55708	down	930.048	1517.99	3.66808	4.30692	858.208	816.13	749.28	1070.14	984.391	1102.13	1457.44	1497.25	1599.28	3.47214	3.45213	3.41028	4.04933	4.17292	3.45171	4.28741	4.27208	4.36129	NM_011058	chr5:75593888-75593947	Pdgfra	Mus musculus platelet derived growth factor receptor, alpha polypeptide (Pdgfra), transcript variant 1, mRNA [NM_011058]	GO:0004672|GO:0030325|GO:0004713|GO:0008210|GO:0005018|GO:0009887|GO:0005524|GO:0033327|GO:0030324|GO:0000166|GO:0030539|GO:0008585|GO:0048010|GO:0048008|GO:0016020|GO:0006468|GO:0016301|GO:0030198|GO:0016021|GO:0008284|GO:0005515|GO:0004872|GO:0001701|GO:0016740|GO:0005021|GO:0060021|GO:0048705|GO:0001553|GO:0005887|GO:0042475|GO:0060325|GO:0004714|GO:0009653|GO:0048407|GO:0007169	NM_011058	Mm.221403	18595	ENSMUST00000000476	TC1633686
A_52_P214126	0.00484773	1.72053	down	136.049	238.398	0.852275	1.63513	149.768	167.518	166.636	91.1116	82.882	158.379	254.505	222.436	238.252	0.953541	1.16764	1.24147	0.495306	0.602819	0.652867	1.76974	1.52122	1.61443	NM_009662	chr6:116360425-116360366	Alox5	Mus musculus arachidonate 5-lipoxygenase (Alox5), mRNA [NM_009662]	GO:0005515|GO:0042383|GO:0006954|GO:0002540|GO:0045907|GO:0030425|GO:0016491|GO:0019370|GO:0005506|GO:0005634|GO:0046872|GO:0005635|GO:0016020|GO:0004051|GO:0005737|GO:0016702|GO:0019372|GO:0019369|GO:0005625|GO:0055114|GO:0006691|GO:0016165	NM_009662	Mm.41072	11689	ENSMUST00000026795	TC1582829
A_51_P219970	0.00765408	1.72959	up	4026.94	2411.71	5.76546	4.97503	5261.45	4130.09	4862.17	3564.21	2818.9	3524.84	2338.16	2531.43	2365.54	6.0882	5.79143	6.1083	5.78511	5.69075	5.12897	4.96934	5.02972	4.92604	AK007931	chr15:100515614-100515555	Cela1	Mus musculus 10 day old male pancreas cDNA, RIKEN full-length enriched library, clone:1810062B19 product:elastase 1, pancreatic, full insert sequence. [AK007931]	GO:0016787|GO:0008236|GO:0008233		Mm.2131	109901		TC1592557
A_51_P439746	0.00104196	1.84751	down	514.55	994.528	2.80364	3.68923	630.874	594.345	542.539	452.485	354.827	512.23	861.835	993	1128.75	3.02817	2.99463	2.9445	2.80747	2.7008	2.34627	3.52945	3.67963	3.85859	NM_029478	chr11:86424917-86424858	Tmem49	Mus musculus transmembrane protein 49 (Tmem49), mRNA [NM_029478]	GO:0016020|GO:0008150|GO:0003674|GO:0016021|GO:0005575	NM_029478	Mm.479212	75909	ENSMUST00000018315	TC1754632
A_52_P262511	0.0896378	1.6242	down	1898.73	3007.99	4.59371	5.29344	2819.84	2534.42	2430.11	1166.84	942.292	1498.88	2957.07	2887	3179.88	5.18836	5.08691	5.10773	4.17414	4.10986	3.89529	5.30814	5.21934	5.35284	NM_021472	chr14:51724682-51724741	Rnase4	Mus musculus ribonuclease, RNase A family 4 (Rnase4), transcript variant 1, mRNA [NM_021472]	GO:0004519|GO:0003676|GO:0005576|GO:0016787|GO:0008150|GO:0003674|GO:0004518|GO:0005575|GO:0004522	NM_021472	Mm.202665	58809	ENSMUST00000022428	TC1685825
A_51_P424532	0.0163461	2.73932	down	129.219	340.981	0.694764	2.14858	54.2815	153.733	70.3068	160.75	141.149	195.094	305.605	342.174	375.165	-0.510653	1.04375	-0.00348902	1.31441	1.37091	0.953652	2.03371	2.14256	2.26946	NM_011704	chr10:23624524-23624583	Vnn1	Mus musculus vanin 1 (Vnn1), mRNA [NM_011704]	GO:0033089|GO:0005886|GO:0006954|GO:0016810|GO:0005615|GO:0016811|GO:0017159|GO:0002526|GO:0016787|GO:0006916|GO:0016020|GO:0002544|GO:0016337|GO:0006807|GO:0034235|GO:0045087|GO:0016021|GO:0031225	NM_011704	Mm.27154	22361	ENSMUST00000041416	TC1581156
A_52_P476950	0.00214916	2.05113	down	2012.12	4104.95	4.70632	5.74274	1401.1	2608.02	1580.02	1600.35	1434.89	3448.34	4214.08	4141.02	3959.76	4.1793	5.12821	4.48664	4.62991	4.71655	5.09731	5.81919	5.73975	5.66928	NM_172495	chr10:30365572-30365513	Ncoa7	Mus musculus nuclear receptor coactivator 7 (Ncoa7), transcript variant 1, mRNA [NM_172495]	GO:0005634|GO:0008150|GO:0006350|GO:0003674|GO:0016998|GO:0005575|GO:0045449	NM_172495	Mm.297903	211329		TC1605084
A_52_P674524	0.0376112	1.61237	up	61.3544	39.997	-0.294957	-0.984142	67.3183	51.3369	62.7585	36.3337	58.4841	91.8949	52.2672	39.7105	28.0133	-0.200116	-0.538605	-0.167343	-0.83102	0.0998049	-0.132462	-0.51398	-0.964573	-1.47387	NM_010244	chr4:147243744-147243803	Fv1	Mus musculus Friend virus susceptibility 1 (Fv1), mRNA [NM_010244]	GO:0009615|GO:0005794	NM_010244	Mm.422607	14349	ENSMUST00000094481	TC1586817
A_52_P707683	0.000720743	2.14604	up	93.896	45.5692	0.319008	-0.782671	112.312	101.778	91.4654	69.1168	57.3286	131.376	53.8653	50.0588	32.7836	0.538323	0.448746	0.376072	0.0967069	0.0710163	0.383184	-0.470529	-0.630469	-1.24701	AK087612	chr3:24440310-24440251		Mus musculus 2 days pregnant adult female oviduct cDNA, RIKEN full-length enriched library, clone:E230024J12 product:unclassifiable, full insert sequence. [AK087612]
A_51_P501730	0.00637991	1.75307	up	296.527	175.938	2.00264	1.19276	232.512	310.405	220.034	335.623	280.382	400.209	171.228	158.466	198.119	1.58812	2.05748	1.6425	2.37644	2.36108	1.99024	1.19796	1.03201	1.34831	NM_030209	chr8:122574817-122574876	Crispld2	Mus musculus cysteine-rich secretory protein LCCL domain containing 2 (Crispld2), mRNA [NM_030209]	GO:0005576|GO:0030198|GO:0031012|GO:0005539|GO:0008201	NM_030209	Mm.264680	78892	ENSMUST00000108972	TC1574954
A_51_P511800	0.0405723	1.65699	down	417.082	690.082	2.43973	3.1683	573.789	523.92	532.803	260.532	233.575	377.871	705.279	636.013	728.954	2.89133	2.81267	2.91838	2.01106	2.09757	1.90738	3.24024	3.03689	3.22777	NM_025909	chr4:102994426-102997635	Oma1	Mus musculus OMA1 homolog, zinc metallopeptidase (S. cerevisiae) (Oma1), mRNA [NM_025909]	GO:0006508|GO:0016787|GO:0046872|GO:0016020|GO:0008150|GO:0003674|GO:0004222|GO:0008233|GO:0005739|GO:0008237|GO:0016021	NM_025909	Mm.30021	67013	ENSMUST00000035780	TC1578955
A_51_P399305	0.0273428	2.26715	down	285.562	630.918	1.85873	3.03961	192.894	169.198	165.034	415.643	344.986	425.614	590.564	635.67	666.52	1.31862	1.18204	1.22754	2.68494	2.66023	2.07903	2.98414	3.03611	3.09859	NM_013869	chr14:61583007-61582948	Tnfrsf19	Mus musculus tumor necrosis factor receptor superfamily, member 19 (Tnfrsf19), transcript variant 1, mRNA [NM_013869]	GO:0005576|GO:0004872|GO:0016020|GO:0005886|GO:0016021|GO:0001942	NM_013869	Mm.281356	29820	ENSMUST00000111234	TC1577033
A_51_P480796	0.00543062	1.63805	down	51.5382	86.7851	-0.53282	0.179158	54.4217	37.2432	43.0498	59.7396	40.895	73.8802	85.8713	85.2097	89.2744	-0.506934	-1.00163	-0.711145	-0.113641	-0.416316	-0.447259	0.20229	0.136925	0.198259	NM_029249	chr10:87554775-87554716	4930547N16Rik	Mus musculus RIKEN cDNA 4930547N16 gene (4930547N16Rik), mRNA [NM_029249]	GO:0005634|GO:0008150|GO:0003674|GO:0003677|GO:0005737|GO:0005575	NM_029249	Mm.179378	75317		TC1580879
A_52_P531949	0.000327683	1.50938	up	212.383	147.234	1.53592	0.941966	231.98	187.506	199.719	216.833	169.733	268.527	145.6	149.35	146.751	1.58481	1.33026	1.50275	1.74618	1.63695	1.41455	0.964055	0.946532	0.91531	BC030405	chr17:15956915-15956856	Rgmb	Mus musculus RGM domain family, member B, mRNA (cDNA clone IMAGE:5351870), partial cds. [BC030405]	GO:0030509|GO:0016020|GO:0007155|GO:0005886|GO:0045941|GO:0005793|GO:0042802|GO:0046658|GO:0007165|GO:0031225		Mm.293466	68799		TC1594729
A_51_P409694	0.0117448	1.76753	down	566.608	1037.62	2.93676	3.75849	521.956	415.309	454.101	717.361	578.521	712.4	993.999	1053.85	1065.03	2.75474	2.47751	2.68779	3.4723	3.40606	2.82217	3.73529	3.76543	3.77476	NM_019976	chr3:108190946-108191005	Psrc1	Mus musculus proline/serine-rich coiled-coil 1 (Psrc1), mRNA [NM_019976]	GO:0031116|GO:0005819|GO:0001578|GO:0030308|GO:0008017|GO:0005515|GO:0009987|GO:0030496|GO:0005737|GO:0007049|GO:0043193|GO:0015630	NM_019976	Mm.389499	56742	ENSMUST00000102630	TC1576836
A_51_P152203	0.000332353	1.53982	down	155.433	251.597	1.09091	1.71367	169.919	165.041	147.659	154.776	120.427	174.777	236.224	258.27	260.298	1.13566	1.14615	1.06705	1.25978	1.14184	0.794996	1.6622	1.73671	1.7421	NM_001004066	chr12:117297995-117298054	Zfp386	Mus musculus zinc finger protein 386 (Kruppel-like) (Zfp386), transcript variant 1, mRNA [NM_001004066]	GO:0046872|GO:0008150|GO:0003677|GO:0003682|GO:0005575|GO:0016564	NM_001004066	Mm.254997	56220	ENSMUST00000039622	TC1579897
A_52_P764017	0.0153238	1.60881	up	142.163	90.976	0.932444	0.246453	110.48	109.202	125.411	161.489	135.309	211.086	88.3684	88.6496	95.9101	0.514601	0.550329	0.83144	1.32104	1.30994	1.06731	0.243644	0.194022	0.301694	BU920977	chr12:4252070-4252011		6072-69 Mouse E14.5 retina lambda ZAP II Library Mus musculus cDNA, mRNA sequence [BU920977]			Mm.443095			TC1663189
A_51_P214127	3.03479e-05	3.73392	down	76.9217	302.782	0.0779714	1.97866	94.0607	76.9469	80.6348	71.8287	69.6805	68.3784	280.655	295.863	331.827	0.282478	0.0452609	0.19425	0.15223	0.352515	-0.558905	1.91084	1.93277	2.09237	NM_007753	chr3:20115733-20115674	Cpa3	Mus musculus carboxypeptidase A3, mast cell (Cpa3), mRNA [NM_007753]	GO:0006508|GO:0004180|GO:0031410|GO:0016787|GO:0046872|GO:0004181|GO:0042629|GO:0008270|GO:0008233|GO:0008237	NM_007753	Mm.1135	12873	ENSMUST00000001921	TC1579983
A_51_P197850	0.000680259	1.56026	down	110.059	180.725	0.5931	1.23489	124.628	114.625	114.465	101.835	86.0577	118.743	171.44	173.793	196.942	0.688442	0.620254	0.699676	0.655836	0.657064	0.237326	1.19975	1.16521	1.33971	NM_011629	chr10:93650999-93653388	Nr2c1	Mus musculus nuclear receptor subfamily 2, group C, member 1 (Nr2c1), mRNA [NM_011629]	GO:0004872|GO:0005515|GO:0003700|GO:0006350|GO:0042826|GO:0003707|GO:0042803|GO:0006355|GO:0045449|GO:0005634|GO:0043565|GO:0046872|GO:0003677|GO:0004879|GO:0008270|GO:0005575|GO:0000122|GO:0016564	NM_011629	Mm.107483	22025	ENSMUST00000099343	TC1582329
A_51_P268831	1.47779e-05	1.8243	down	339.494	646.388	2.20756	3.0749	318.04	378.021	306.658	305.784	273.298	455.16	686.414	634.64	618.108	2.04002	2.34179	2.12141	2.24211	2.32416	2.17586	3.20112	3.03377	2.9898	NM_172659	chr2:26877207-26877148	Slc2a6	Mus musculus solute carrier family 2 (facilitated glucose transporter), member 6 (Slc2a6), transcript variant 1, mRNA [NM_172659]	GO:0016020|GO:0008150|GO:0003674|GO:0016021|GO:0005575|GO:0006810|GO:0008643	NM_172659	Mm.41203	227659	ENSMUST00000045702	NP968339
A_52_P175748	0.0746469	1.53133	up	282.873	190.563	1.91494	1.30015	234.865	192.907	217.84	375.182	290.843	385.602	155.372	216.719	199.597	1.60264	1.37123	1.62805	2.53719	2.41393	1.93659	1.05776	1.48366	1.35903		chr8:11623364-11623305		Q46T80_RALEJ (Q46T80) Twin-arginine translocation pathway signal, partial (5%) [TC1663452]						TC1663452
A_51_P472003	0.00364748	1.62248	down	477.315	812.123	2.70604	3.40424	417.308	409.039	449.774	504.452	467.272	616.042	764.756	821.378	850.235	2.43193	2.45556	2.67397	2.96431	3.09795	2.61251	3.35704	3.40588	3.4498	NM_177667	chr4:106312448-106312507	Ttc22	Mus musculus tetratricopeptide repeat domain 22 (Ttc22), mRNA [NM_177667]	GO:0008150|GO:0003674|GO:0005488|GO:0005575	NM_177667	Mm.41945	230576	ENSMUST00000047922	TC1585326
A_51_P277416	0.0743411	1.83022	down	82.9983	148.831	0.0709366	0.942951	52.8674	55.3594	45.4862	114.614	93.0765	136.587	119.968	163.694	162.832	-0.548738	-0.429772	-0.631724	0.82638	0.770177	0.439297	0.68469	1.07884	1.06533	NM_138587	chr6:22278562-22272297	Fam3c	Mus musculus family with sequence similarity 3, member C (Fam3c), mRNA [NM_138587]	GO:0005576|GO:0008150|GO:0003674|GO:0005575	NM_138587	Mm.479175	27999	ENSMUST00000081288	TC1654950
A_52_P520429	0.0510578	1.53581	down	582.164	937.974	2.97929	3.59829	464.966	507.455	447.57	693.814	651.224	727.956	753.081	1023.32	1037.52	2.58794	2.76661	2.66689	3.42415	3.57684	2.85333	3.33485	3.72302	3.73701	BC002165	chr2:177803676-177803617		RIKEN cDNA 2810021G02 gene Gene [Source:MGI Symbol;Acc:MGI:2441662] [ENSMUST00000108923]			Mm.425123		ENSMUST00000108923	TC1605303
A_51_P432288	0.0361985	2.42073	down	160.28	368.711	0.984398	2.25984	101.081	72.513	98.6595	237.748	200.924	250.754	320.175	390.311	395.649	0.386324	-0.0403624	0.485305	1.87903	1.88034	1.31575	2.1009	2.33246	2.34616	NM_153504	chr4:62088706-62088647	Rnf183	Mus musculus ring finger protein 183 (Rnf183), mRNA [NM_153504]	GO:0005515|GO:0046872|GO:0016020|GO:0008150|GO:0003674|GO:0008270|GO:0016021|GO:0005575	NM_153504	Mm.169565	76072	ENSMUST00000107454	TC1589184
A_52_P280821	0.0037901	1.50689	up	90.3071	61.7165	0.278688	-0.312883	107.861	102.121	100.538	65.2386	60.1165	105.967	64.0996	60.9092	60.1408	0.479989	0.453608	0.512516	0.0133953	0.139522	0.0730972	-0.219571	-0.347433	-0.371644		chr2:155215043-155214984
A_51_P361650	0.00135167	1.64485	up	38299.8	24611.7	9.04134	8.32338	42568.9	38749.6	39588.7	36967.7	32297.2	39626.6	25262.9	26356.4	22215.7	9.10447	9.02136	9.13372	9.15972	9.20895	8.61981	8.40292	8.40984	8.15738	NM_009117	chr7:53996639-53996167	Saa1	Mus musculus serum amyloid A 1 (Saa1), mRNA [NM_009117]	GO:0005576|GO:0005515|GO:0008203|GO:0005615|GO:0006953|GO:0034364	NM_009117	Mm.148800	20208	ENSMUST00000128088	TC1582999
A_51_P181565	0.000162054	1.7238	down	595.52	1080.6	3.02839	3.81398	662.261	524.661	615.002	555.737	504.81	710.646	979.567	1166.14	1096.11	3.09821	2.81471	3.12537	3.104	3.20943	2.81861	3.71419	3.9115	3.81626	NM_010415	chr18:36664797-36664738	Hbegf	Mus musculus heparin-binding EGF-like growth factor (Hbegf), mRNA [NM_010415]	GO:0005576|GO:0016020|GO:0005886|GO:0030307|GO:0008083|GO:0008016|GO:0007173|GO:0016021|GO:0008201	NM_010415	Mm.289681	15200	ENSMUST00000025363	TC1579973
A_51_P499816	2.5229e-06	2.34133	down	48.9292	119.443	-0.592541	0.634787	49.2198	44.243	48.0654	48.9142	35.4563	67.6767	115.871	108.721	133.737	-0.651877	-0.753154	-0.552155	-0.402077	-0.622196	-0.573788	0.634556	0.488462	0.781342	NM_026701	chr10:62540038-62540097	Pbld	Mus musculus phenazine biosynthesis-like protein domain containing (Pbld), mRNA [NM_026701]	GO:0008150|GO:0003674|GO:0009058|GO:0016853|GO:0005575|GO:0003824	NM_026701	Mm.261389	68371	ENSMUST00000020266	TC1582405
A_52_P529486	0.00675622	1.54482	down	1031.32	1671.6	3.81753	4.44496	1289.15	1023.8	1093.07	991.547	803.831	986.54	1556.13	1681.26	1777.41	4.05916	3.77919	3.9551	3.93928	3.88058	3.29186	4.38193	4.43931	4.51365	NM_027432	chr3:105770449-105770508	Wdr77	Mus musculus WD repeat domain 77 (Wdr77), mRNA [NM_027432]	GO:0030374|GO:0005634|GO:0060528|GO:0006357|GO:0005737|GO:0060770|GO:0008285|GO:0008284	NM_027432	Mm.5110	70465	ENSMUST00000010278	TC1571915
A_52_P168921	0.0697468	1.64534	down	4713.48	7822.81	5.95056	6.66894	3487.61	3049.02	3353.94	6180.84	5320.77	6888.67	6980.12	8433.75	8054.56	5.49498	5.3536	5.57256	6.57933	6.60725	6.09564	6.54722	6.76594	6.69367	NM_001008427	chr7:49915599-49915540	Gm5595	Mus musculus predicted gene 5595 (Gm5595), mRNA [NM_001008427]	GO:0046872|GO:0008150|GO:0003674|GO:0005575	NM_001008427	Mm.284947	434179	ENSMUST00000107992	TC1781693
A_52_P303274	0.0537187	1.55704	up	47.9021	30.8776	-0.717368	-1.35617	44.6605	37.5379	36.633	35.7274	33.5496	99.3044	42.1904	25.7949	24.6475	-0.792115	-0.990254	-0.944007	-0.8553	-0.701944	-0.0205884	-0.822973	-1.58701	-1.65855	NM_007884	chr10:97143845-97143904	Epyc	Mus musculus epiphycan (Epyc), mRNA [NM_007884]	GO:0005576|GO:0005515|GO:0005578	NM_007884	Mm.148886	13516	ENSMUST00000020094	TC1578872
A_51_P437050	0.000393825	2.48286	down	33.987	87.6425	-1.12038	0.191621	35.9224	22.8406	30.9718	36.1312	33.2368	44.8195	81.3136	92.0494	89.5643	-1.10623	-1.707	-1.1862	-0.839087	-0.715457	-1.16832	0.123611	0.248317	0.202935	AK043598	chr16:33768387-33768446		HEG homolog 1 (zebrafish) Gene [Source:MGI Symbol;Acc:MGI:1924696] [ENSMUST00000126532]			Mm.245741		ENSMUST00000126532	TC1587452
A_52_P470663	0.0178504	1.71453	down	3961.55	7041.84	5.73834	6.51615	3381.74	2988.97	3139.63	5112.4	4014.91	5131.66	6179.27	7466.06	7480.18	5.4505	5.3249	5.4773	6.30553	6.20099	5.67084	6.37141	6.59011	6.58694	CF584798	chr1:16123127-16123186	Rdh10	retinol dehydrogenase 10 (all-trans) Gene [Source:MGI Symbol;Acc:MGI:1924238] [ENSMUST00000027053]	GO:0009887|GO:0043584|GO:0005488|GO:0043583|GO:0003824|GO:0035115|GO:0003674|GO:0016020|GO:0008152|GO:0004745|GO:0060431|GO:0016021|GO:0048703|GO:0005792|GO:0008150|GO:0008406|GO:0031076|GO:0001701|GO:0060449|GO:0007601|GO:0016491|GO:0001656|GO:0002138|GO:0014032|GO:0048568|GO:0005624|GO:0005575|GO:0005783|GO:0055114		Mm.441476	98711	ENSMUST00000027053	TC1722686
A_51_P288295	0.0871997	2.03863	down	2305.59	4282.34	4.77508	5.80268	3971.24	3191.04	3221.29	1215.03	969.585	1265.36	4155.15	4123.3	4568.56	5.68233	5.41928	5.51434	4.23251	4.15106	3.65096	5.79887	5.73356	5.87561	XM_001003989	chr12:115776793-115776734	LOC677484	PREDICTED: Mus musculus similar to Igh-6 protein (LOC677484), mRNA [XM_001003989]		XM_001003989	Mm.351752	677484	ENSMUST00000103496	NP614354
A_51_P347154	8.42299e-07	9.76996	down	45.5248	441.884	-0.768665	2.51969	36.6757	49.8898	40.6744	31.2962	29.948	84.6645	508.787	409.644	407.222	-1.07629	-0.579857	-0.793032	-1.04634	-0.86578	-0.250689	2.7691	2.40221	2.38776	NM_010084	chr8:25712815-25712756	Adam18	Mus musculus a disintegrin and metallopeptidase domain 18 (Adam18), mRNA [NM_010084]	GO:0006508|GO:0016020|GO:0008150|GO:0007229|GO:0007275|GO:0030154|GO:0004222|GO:0005178|GO:0008270|GO:0016021|GO:0007283|GO:0005575	NM_010084	Mm.89943	13524	ENSMUST00000033957	TC1589155
A_51_P209597	0.0011847	1.65943	up	40.5734	25.0548	-0.891156	-1.62184	39.1199	34.5705	37.7347	41.4778	25.9586	64.579	21.9437	24.4731	28.7475	-0.983212	-1.10906	-0.901262	-0.639989	-1.07203	-0.641382	-1.76608	-1.66289	-1.43655	AK143987	chr5:90977420-90977479		afamin Gene [Source:MGI Symbol;Acc:MGI:2429409] [ENSMUST00000128740]			Mm.348786		ENSMUST00000128740	TC1674123
A_51_P148814	0.0358743	1.55109	down	17635.6	28427.2	7.89885	8.53214	16470.7	12966.4	14298.7	22423.5	18006.5	21647.5	26001.4	29000.7	30279.5	7.73458	7.44196	7.66452	8.43847	8.36606	7.74754	8.44449	8.54778	8.60414	NM_008529	chr15:74789467-74789526	Ly6e	Mus musculus lymphocyte antigen 6 complex, locus E (Ly6e), transcript variant 2, mRNA [NM_008529]	GO:0035265|GO:0030325|GO:0016020|GO:0005886|GO:0001701|GO:0055010|GO:0042415|GO:0048242|GO:0031225	NM_008529	Mm.788	17069	ENSMUST00000023251	TC1674358
A_51_P364250	0.0249087	1.93572	up	2877.4	1476.42	5.22015	4.26728	4291.25	3552.38	3674.38	2002.52	1647.31	2096.54	1504.85	1512.37	1412.05	5.79414	5.57404	5.70421	4.95334	4.91573	4.37942	4.33359	4.28657	4.18166	NM_172471	chr2:10173240-10173299	Itih5	Mus musculus inter-alpha (globulin) inhibitor H5 (Itih5), mRNA [NM_172471]	GO:0005576|GO:0008150|GO:0003674|GO:0004867|GO:0030414|GO:0005575|GO:0030212	NM_172471	Mm.313876	209378	ENSMUST00000026886	TC1578490
A_52_P636608	0.0102342	1.75063	up	41.0303	24.1518	-0.859472	-1.66735	35.9862	29.8144	32.4331	44.844	43.5894	59.5146	22.7209	24.3652	25.3693	-1.10367	-1.32259	-1.11969	-0.527414	-0.324264	-0.759201	-1.71586	-1.66927	-1.6169	AK049020	chr5:45925339-45925280	Fam184b	Mus musculus 0 day neonate cerebellum cDNA, RIKEN full-length enriched library, clone:C230091O15 product:unclassifiable, full insert sequence. [AK049020]	GO:0008150|GO:0003674|GO:0005575		Mm.266466	58227		TC1631081
A_52_P900433	0.0495698	1.82517	up	75.0937	40.3863	-0.0665195	-0.934547	104.009	106.582	97.6057	48.3631	36.2165	57.7862	34.5346	40.2429	46.3815	0.427521	0.515286	0.469812	-0.418423	-0.591591	-0.801722	-1.11184	-0.945359	-0.746439	AK085234	chr16:78349231-78349290		Mus musculus 13 days embryo stomach cDNA, RIKEN full-length enriched library, clone:D530031N05 product:unclassifiable, full insert sequence. [AK085234]
A_52_P200286	0.0124618	1.71444	down	24.0252	42.6652	-1.62574	-0.848003	16.2968	22.5141	21.3836	28.189	23.2464	32.521	39.6744	41.9036	46.4177	-2.24652	-1.72778	-1.72065	-1.1972	-1.23123	-1.63107	-0.911677	-0.887017	-0.745315	NM_001167746	chr11:117884709-117884650	Dnahc17	Mus musculus dynein, axonemal, heavy chain 17 (Dnahc17), mRNA [NM_001167746]	GO:0008150|GO:0005524|GO:0005874|GO:0016887|GO:0000166|GO:0003777|GO:0005929|GO:0003674|GO:0042995|GO:0030286|GO:0005737|GO:0005856|GO:0007018|GO:0003774|GO:0005575	NM_001167746	Mm.473893	69926	ENSMUST00000084803	TC1602008
A_52_P631889	1.68504e-06	2.18155	down	81.6405	184.442	0.13924	1.26459	95.0531	83.008	81.9264	62.3492	58.8415	108.665	173.792	179.961	199.572	0.297618	0.154648	0.217175	-0.0519586	0.108595	0.109365	1.21941	1.21552	1.35885	NM_011576	chr2:84313919-84313860	Tfpi	Mus musculus tissue factor pathway inhibitor (Tfpi), transcript variant 1, mRNA [NM_011576]	GO:0007596|GO:0005576|GO:0004867|GO:0030414	NM_011576	Mm.124316	21788	ENSMUST00000111717	TC1781565
A_52_P274718	0.0027459	1.75834	up	64.399	38.115	-0.205114	-1.01933	76.2277	81.2817	69.3624	49.3594	43.55	66.613	31.8127	43.3101	39.2222	-0.0208001	0.124328	-0.0229988	-0.389004	-0.325567	-0.596642	-1.23028	-0.839387	-0.988317	AK081230	chr2:24461482-24461423		calcium channel, voltage-dependent, N type, alpha 1B subunit Gene [Source:MGI Symbol;Acc:MGI:88296] [ENSMUST00000102939]			Mm.4424		ENSMUST00000102939	TC1661917
A_51_P118545	0.0139212	1.8399	down	689.299	1314.64	3.21547	4.0951	594.352	479.695	577.89	870.484	743.323	870.051	1157.21	1403.44	1383.27	2.94213	2.68544	3.03557	3.75142	3.76768	3.11058	3.95463	4.17873	4.15195	NM_009789	chrX:159400091-159400032	S100g	Mus musculus S100 calcium binding protein G (S100g), mRNA [NM_009789]	GO:0016324|GO:0005499|GO:0016323|GO:0005509	NM_009789	Mm.6891	12309	ENSMUST00000112299	TC1580034
A_52_P17207	0.0815099	2.35548	down	166.902	308.513	0.768186	2.00421	117.635	119.233	268.219	49.1719	47.6968	399.457	275.584	311.812	338.144	0.605132	0.677112	1.92819	-0.394495	-0.194347	1.98752	1.88453	2.00851	2.11958	NM_001168504	chr7:13973004-13973067	Pla2g4c	Mus musculus phospholipase A2, group IVC (cytosolic, calcium-independent) (Pla2g4c), transcript variant 1, mRNA [NM_001168504]	GO:0008150|GO:0003674|GO:0005575	NM_001168504	Mm.479634	232889	ENSMUST00000108528	TC1602239
A_51_P137322	0.000118335	1.77394	down	366.689	686.161	2.33409	3.16105	396.804	376.146	362.388	335.866	317.793	411.138	722.931	648.073	687.478	2.35924	2.33462	2.36231	2.37748	2.54177	2.02911	3.2759	3.06399	3.14325	NM_031161	chr9:121399090-121399031	Cck	Mus musculus cholecystokinin (Cck), mRNA [NM_031161]	GO:0050731|GO:0043204|GO:0043025|GO:0030425|GO:0043203|GO:0051901|GO:0005179|GO:0005184|GO:0001662|GO:0001764|GO:0006919|GO:0007205|GO:0043194|GO:0051930|GO:0007409|GO:0008284|GO:0005576|GO:0005515|GO:0042755|GO:0005615|GO:0032099|GO:0032461|GO:0030424|GO:0001836|GO:0043065|GO:0043195|GO:0006915	NM_031161	Mm.2619	12424	ENSMUST00000060307	TC1593494
A_51_P252157	0.000347446	2.07078	down	292.076	642.785	2.00369	3.05387	309.725	285.348	322.592	301.49	231.728	301.575	527.199	656.799	744.358	2.0018	1.93605	2.19449	2.22171	2.08612	1.582	2.82039	3.08329	3.25794	NM_011623	chr11:98858058-98857244	Top2a	Mus musculus topoisomerase (DNA) II alpha (Top2a), mRNA [NM_011623]	GO:0005515|GO:0030261|GO:0007059|GO:0005524|GO:0003916|GO:0009330|GO:0045944|GO:0016853|GO:0000166|GO:0005694|GO:0005730|GO:0000793|GO:0005634|GO:0006265|GO:0043565|GO:0003677|GO:0006259|GO:0043566|GO:0003682|GO:0040016|GO:0003918	NM_011623	Mm.4237	21973	ENSMUST00000068031	TC1573332
A_52_P450277	0.0486173	1.87606	down	5175.94	9470.95	6.03974	6.94745	8210.93	6442.45	6738.59	3371.11	2751.29	3541.28	10171.6	9131.62	9109.58	6.73029	6.43286	6.57915	5.70475	5.65573	5.13568	7.09045	6.88063	6.87125	M94350	chr16:019062117-019062058	Igl-V1	Mus musculus immunoglobulin lambda chain (IgL) mRNA, complete cds. [M94350]			Mm.326349	16142		TC1586654
A_52_P558401	0.00581137	1.79412	down	358.992	675.628	2.2897	3.13297	344.515	271.734	322.613	438.198	346.295	430.598	585.975	696.803	744.106	2.15538	1.86552	2.19458	2.76118	2.66569	2.09582	2.97288	3.16859	3.25745	NM_172301	chr13:101549427-101549368	Ccnb1	Mus musculus cyclin B1 (Ccnb1), mRNA [NM_172301]	GO:0033129|GO:0005515|GO:0035173|GO:0001556|GO:0007067|GO:0060045|GO:0001701|GO:0001933|GO:0051301|GO:0007049|GO:0019901|GO:0060623|GO:0006461|GO:0010629|GO:0031442|GO:0005634|GO:0005624|GO:0016301|GO:0006468|GO:0005737|GO:0005856|GO:0032403|GO:0005625	NM_172301	Mm.260114	268697	ENSMUST00000072119	TC1573329
A_51_P455997	6.35348e-05	2.09403	up	961.261	483.643	3.72042	2.65414	1048.36	1094.93	878.633	904.836	789.555	1051.25	533.616	460.906	456.408	3.76088	3.8761	3.64004	3.80726	3.85473	3.38351	2.83784	2.57231	2.55226	NR_027652	chr12:110809678-110809737	Meg3	Mus musculus maternally expressed 3 (Meg3), transcript variant 3, non-coding RNA [NR_027652]		NR_027652	Mm.289645	17263	ENSMUST00000021696	TC1653978
A_52_P67088	0.00229344	1.58797	down	346.607	578.148	2.24771	2.91489	397.511	324.451	337.063	382.085	272.832	365.698	562.282	573.716	598.445	2.36181	2.12133	2.25779	2.56349	2.3217	1.86014	2.91333	2.88817	2.94316	NM_019731	chr17:26230662-26230603	Nme4	Mus musculus non-metastatic cells 4, protein expressed in (Nme4), nuclear gene encoding mitochondrial protein, mRNA [NM_019731]	GO:0006241|GO:0046872|GO:0006228|GO:0009117|GO:0006183|GO:0005524|GO:0016740|GO:0016301|GO:0005739|GO:0004550|GO:0000166	NM_019731	Mm.41787	56520	ENSMUST00000025007	TC1578885
A_52_P340669	0.0262206	1.54424	down	484.211	771.93	2.70142	3.32832	657.208	520.572	569.445	414.112	319.05	424.877	725.641	734.875	855.274	3.08716	2.80342	3.01433	2.67962	2.54747	2.07653	3.2813	3.24533	3.45833	NM_010800	chr5:144955175-144955234	Bhlha15	Mus musculus basic helix-loop-helix family, member a15 (Bhlha15), mRNA [NM_010800]	GO:0005515|GO:0006350|GO:0007186|GO:0045944|GO:0048469|GO:0048312|GO:0006355|GO:0007030|GO:0042803|GO:0045449|GO:0030528|GO:0005634|GO:0042593|GO:0003677|GO:0006851|GO:0007267|GO:0019722	NM_010800	Mm.386767	17341	ENSMUST00000060747	TC1608058
A_51_P402943	4.25301e-05	9.58245	down	204.677	1970.57	1.42132	4.68172	158.452	143.497	122.921	284.311	244.466	274.412	1813.61	1989.4	2108.7	1.03486	0.94435	0.802507	2.13707	2.16332	1.44582	4.60283	4.68209	4.76022	NM_009114	chr3:90496644-90496585	S100a9	Mus musculus S100 calcium binding protein A9 (calgranulin B) (S100a9), mRNA [NM_009114]	GO:0045113|GO:0005576|GO:0016020|GO:0005886|GO:0030595|GO:0005615|GO:0006935|GO:0005856|GO:0005737|GO:0031532|GO:0005509	NM_009114	Mm.2128	20202	ENSMUST00000117167	TC1578387
A_51_P355301	0.0103969	3.65108	down	84.4411	265.367	-0.0771565	1.79117	57.2434	196.691	109.513	36.8498	30.336	76.014	255.562	263.954	276.584	-0.434006	1.39926	0.635871	-0.810671	-0.847207	-0.406182	1.77571	1.76812	1.82966	NM_007818	chr5:146673925-146672058	Cyp3a11	Mus musculus cytochrome P450, family 3, subfamily a, polypeptide 11 (Cyp3a11), mRNA [NM_007818]	GO:0005792|GO:0005789|GO:0016491|GO:0050649|GO:0005506|GO:0009055|GO:0032451|GO:0016020|GO:0046872|GO:0020037|GO:0004497|GO:0016712|GO:0070330|GO:0005783|GO:0055114	NM_007818	Mm.332844	13112	ENSMUST00000035918	TC1665081
A_51_P388298	0.00207789	1.52186	down	449.772	721.268	2.62843	3.23427	508.125	412.384	439.699	453.652	391.797	492.976	704.115	731.387	728.302	2.716	2.46731	2.64129	2.81119	2.84379	2.291	3.23785	3.23847	3.22648	NM_025962	chr4:116375126-116375067	Mmachc	Mus musculus methylmalonic aciduria cblC type, with homocystinuria (Mmachc), mRNA [NM_025962]	GO:0008150|GO:0003674|GO:0005739|GO:0031419	NM_025962	Mm.476787	67096	ENSMUST00000030453	TC1580217
A_51_P427052	0.00314001	2.28274	up	549.919	248.633	2.87742	1.68666	486.399	369.087	438.864	710.476	534.071	760.616	220.015	292.971	232.913	2.65295	2.30729	2.63855	3.45838	3.29072	2.91665	1.55965	1.91859	1.58173	NM_008868	chr4:138300427-138300486	Pla2g2c	Mus musculus phospholipase A2, group IIC (Pla2g2c), mRNA [NM_008868]	GO:0016042|GO:0005576|GO:0016787|GO:0047498|GO:0046872|GO:0006644|GO:0009395|GO:0005575|GO:0004623|GO:0005509	NM_008868	Mm.5189	18781	ENSMUST00000030530	TC1589447
A_52_P160005	0.0119605	1.56362	down	27.3614	43.7185	-1.45468	-0.809791	22.7772	23.2641	20.4135	29.2045	24.4918	44.0174	44.056	43.8608	43.2387	-1.76353	-1.6805	-1.78763	-1.14614	-1.15594	-1.19437	-0.760547	-0.821161	-0.847665	NM_211138	chrX:90994629-90994688	Pcyt1b	Mus musculus phosphate cytidylyltransferase 1, choline, beta isoform (Pcyt1b), transcript variant 1, mRNA [NM_211138]	GO:0001541|GO:0016779|GO:0016740|GO:0009058|GO:0004105|GO:0007283|GO:0003824|GO:0005783|GO:0008654	NM_211138	Mm.166467	236899	ENSMUST00000045898	TC1626499
A_51_P473383	0.00155309	1.62215	down	113.267	192.694	0.632085	1.32999	121.526	98.4127	98.8197	125.789	98.7706	136.284	188.486	192.211	197.385	0.652084	0.400243	0.487646	0.960602	0.855842	0.436096	1.3365	1.31053	1.34295	NM_011858	chr7:104055032-104055091	Odz4	Mus musculus odd Oz/ten-m homolog 4 (Drosophila) (Odz4), mRNA [NM_011858]	GO:0016020|GO:0003674|GO:0016021|GO:0007165|GO:0005575|GO:0001702	NM_011858	Mm.254610	23966	ENSMUST00000084996	TC1719541
A_52_P638459	0.00704503	1.76296	up	4163.79	2443.65	5.81199	4.99399	5646.33	4786.86	4441.45	3569.13	2966.44	3572.52	2440.69	2551.73	2338.53	6.19006	6.00433	5.97773	5.7871	5.76435	5.14835	5.03126	5.04124	4.90947	NM_013653	chr11:83339355-83339296	Ccl5	Mus musculus chemokine (C-C motif) ligand 5 (Ccl5), mRNA [NM_013653]	GO:0034097|GO:0005576|GO:0048247|GO:0006955|GO:0005125|GO:0006954|GO:0005615|GO:0045672|GO:0034612|GO:0006935|GO:0005737|GO:0008009|GO:0031622|GO:0005625	NM_013653	Mm.284248	20304	ENSMUST00000035938	TC1583383
A_51_P417251	0.0177572	1.58179	up	504.371	331.81	2.76746	2.10589	423.7	536.393	351.415	511.555	503.506	699.654	383.506	308.486	303.439	2.45386	2.84662	2.31795	2.98449	3.2057	2.79612	2.36129	1.99304	1.96335	NM_134022	chr11:70845753-70845694	6330403K07Rik	Mus musculus RIKEN cDNA 6330403K07 gene (6330403K07Rik), mRNA [NM_134022]	GO:0008150|GO:0003674|GO:0005575	NM_134022	Mm.27768	103712	ENSMUST00000018595	TC1768152
A_52_P172014	0.000138543	1.51031	down	53.7805	85.1786	-0.442719	0.152125	57.942	50.9989	55.6266	51.8756	41.492	64.7479	87.7783	83.0705	84.687	-0.416505	-0.548136	-0.341378	-0.317275	-0.395408	-0.637613	0.233978	0.100244	0.122153	NM_016894	chr1:93121428-93121487	Ramp1	Mus musculus receptor (calcitonin) activity modifying protein 1 (Ramp1), transcript variant 1, mRNA [NM_016894]	GO:0008277|GO:0008565|GO:0006886|GO:0004872|GO:0016020|GO:0005615|GO:0015027|GO:0007186|GO:0016021|GO:0006810	NM_016894	Mm.3272	51801		TC1592746
A_51_P503756	0.047692	1.77172	down	13715.9	24141.5	7.4727	8.29786	20716	16776.9	17544.9	9424.17	8157.87	9675.62	25681.7	23237.9	23504.9	8.06542	7.81366	7.95968	7.18789	7.22381	6.58576	8.42664	8.22817	8.23876	AK008094	chr16:19061885-19061826	Igl-V1	Mus musculus adult male small intestine cDNA, RIKEN full-length enriched library, clone:2010004G10 product:immunoglobulin lambda chain, variable 1, full insert sequence. [AK008094]			Mm.326349	16142		TC1572776
A_51_P162671	0.0233358	1.57185	down	72.2245	116.569	-0.0494572	0.603009	60.1013	59.4876	51.8764	84.4963	69.6014	107.784	111.641	112.474	125.592	-0.363719	-0.326013	-0.442075	0.386559	0.350877	0.0976276	0.580906	0.537433	0.690688	NM_008035	chr7:108988830-108988771	Folr2	Mus musculus folate receptor 2 (fetal) (Folr2), mRNA [NM_008035]	GO:0006620|GO:0004872|GO:0016020|GO:0005886|GO:0005624|GO:0005542|GO:0031225|GO:0008517	NM_008035	Mm.439666	14276	ENSMUST00000094141	NP381209
A_51_P257832	0.0362137	1.52168	down	142.825	223.61	0.936784	1.54245	192.099	164.606	168.536	113.254	96.6901	121.765	211.242	217.619	241.97	1.31266	1.14234	1.25783	0.80916	0.825129	0.273577	1.50094	1.48964	1.63677	NM_009479	chr7:140889411-140889352	Uros	Mus musculus uroporphyrinogen III synthase (Uros), mRNA [NM_009479]	GO:0004852|GO:0033014|GO:0016829|GO:0006779|GO:0048037|GO:0005739|GO:0006783	NM_009479	Mm.3160	22276	ENSMUST00000106144	TC1714118
A_52_P193925	0.016873	1.73138	down	2006.36	3572.44	4.75046	5.54238	1595.99	1658.8	1448.19	2505.3	2078.29	2751.6	3469.8	3571.26	3676.27	4.36719	4.4754	4.36096	5.27651	5.25101	4.77168	5.53882	5.5262	5.56211	NM_028072	chr2:165899726-165899667	Sulf2	Mus musculus sulfatase 2 (Sulf2), mRNA [NM_028072]	GO:0005615|GO:0009986|GO:0003824|GO:0005509|GO:0006790|GO:0008484|GO:0016787|GO:0046872|GO:0008152|GO:0008449|GO:0005783|GO:0004065|GO:0005794	NM_028072	Mm.1011	72043	ENSMUST00000088086	TC1571976
A_51_P444543	0.00210389	1.52544	up	205.093	137.58	1.44946	0.840238	243.359	232.487	198.618	151.884	126.37	277.839	144.268	145.045	123.426	1.6539	1.64048	1.49477	1.23256	1.21135	1.46373	0.950797	0.904333	0.665584	NM_138942	chr2:27037081-27037140	Dbh	Mus musculus dopamine beta hydroxylase (Dbh), mRNA [NM_138942]	GO:0050900|GO:0006584|GO:0046333|GO:0042596|GO:0009987|GO:0007626|GO:0002443|GO:0003824|GO:0001816|GO:0031410|GO:0046872|GO:0042593|GO:0016020|GO:0042309|GO:0031418|GO:0048149|GO:0008306|GO:0016021|GO:0008542|GO:0006548|GO:0007613|GO:0048265|GO:0045907|GO:0042981|GO:0016491|GO:0030424|GO:0042423|GO:0042711|GO:0042127|GO:0004500|GO:0042420|GO:0001974|GO:0042421|GO:0004497|GO:0005507|GO:0055114|GO:…	NM_138942	Mm.167781	13166	ENSMUST00000000910	TC1588189
A_51_P204402	0.0391154	1.60839	down	391.96	651.735	2.39847	3.08409	331.009	281.132	316.02	510.548	414.25	498.802	595.627	643.421	716.156	2.09768	1.91457	2.16479	2.98164	2.92419	2.30795	2.99645	3.0536	3.20221	NM_011369	chr8:4736060-4736001	Shcbp1	Mus musculus Shc SH2-domain binding protein 1 (Shcbp1), mRNA [NM_011369]	GO:0005515|GO:0042169|GO:0008150|GO:0005575	NM_011369	Mm.37801	20419	ENSMUST00000022945	TC1576543
A_52_P592007	0.000128688	2.58184	down	106.466	291.34	0.551811	1.92021	112.264	110.191	93.3766	115.864	99.7694	107.329	256.822	293.566	323.633	0.537711	0.563331	0.405909	0.842033	0.870358	0.0915251	1.78281	1.92152	2.0563	NM_011576	chr2:84294021-84293962	Tfpi	Mus musculus tissue factor pathway inhibitor (Tfpi), transcript variant 1, mRNA [NM_011576]	GO:0007596|GO:0005576|GO:0004867|GO:0030414	NM_011576	Mm.124316	21788	ENSMUST00000111717	TC1577595
A_52_P640922	0.0290995	1.62673	down	43.7425	70.0821	-0.84942	-0.147447	40.815	48.019	43.1606	24.4222	25.3094	80.7285	86.2693	63.7923	60.1846	-0.922017	-0.634996	-0.707437	-1.40414	-1.10857	-0.319367	0.208961	-0.280709	-0.370593	NM_177577	chr13:25297328-25297387	Dcdc2a	Mus musculus doublecortin domain containing 2a (Dcdc2a), mRNA [NM_177577]	GO:0008150|GO:0003674|GO:0005575	NM_177577	Mm.284719	195208	ENSMUST00000069614	TC1598797
A_51_P201638	0.00677376	1.50265	up	3055.38	2135.26	5.38743	4.79992	3619.35	2916.54	3391.36	2950.22	2437.26	3017.55	2095.02	2202.69	2108.06	5.54847	5.28951	5.58857	5.51235	5.48088	4.90479	4.81093	4.82903	4.75978	NM_011676	chr11:78162073-78162132	Unc119	Mus musculus unc-119 homolog (C. elegans) (Unc119), mRNA [NM_011676]	GO:0007601|GO:0050896	NM_011676	Mm.284811	22248	ENSMUST00000100755	TC1607150
A_52_P462296	0.000624162	1.53954	up	129.519	88.5994	0.825466	0.202964	136.989	137.887	118.835	110.532	112.186	160.685	100.573	82.198	83.027	0.824878	0.886814	0.753734	0.774064	1.03959	0.673717	0.430288	0.0850115	0.0935917	NM_007755	chr7:88492422-88492363	Cpeb1	Mus musculus cytoplasmic polyadenylation element binding protein 1 (Cpeb1), mRNA [NM_007755]	GO:0045211|GO:0003676|GO:0005515|GO:0003729|GO:0005886|GO:0007130|GO:0048168|GO:0003723|GO:0006397|GO:0006417|GO:0016020|GO:0005624|GO:0030054|GO:0045202|GO:0005737|GO:0030529	NM_007755	Mm.273122	12877	ENSMUST00000079948	TC1580339
A_52_P279184	0.0630115	1.53663	down	74.1473	128.106	0.0274627	0.64723	76.2276	72.624	80.5194	78.2478	60.3296	76.9355	70	157.476	156.842	-0.0208011	-0.0381546	0.192183	0.27572	0.144627	-0.388797	-0.0925312	1.02297	1.01125	NM_011899	chr12:56190256-56191171	Srp54a	Mus musculus signal recognition particle 54A (Srp54a), mRNA [NM_011899]	GO:0008312|GO:0005515|GO:0043021|GO:0005737|GO:0006614|GO:0005730	NM_011899	Mm.12848	24067	ENSMUST00000110703	TC1673100
A_51_P263290	0.0259538	1.5942	down	39.3818	63.1362	-0.956305	-0.283474	31.3075	31.8154	26.8589	41.3578	34.93	70.0213	61.2934	69.6222	58.493	-1.3046	-1.22888	-1.39175	-0.644169	-0.643773	-0.524653	-0.284155	-0.154544	-0.411725	NM_198306	chr5:111050001-111050060	Galnt9	Mus musculus UDP-N-acetyl-alpha-D-galactosamine:polypeptide N-acetylgalactosaminyltransferase 9 (Galnt9), transcript variant A, mRNA [NM_198306]	GO:0008150|GO:0003674|GO:0016740|GO:0005575	NM_198306	Mm.275748	231605	ENSMUST00000040001	TC1584352
A_51_P458130	0.021307	1.50645	down	1078.45	1691.12	3.86884	4.45999	1402.91	1172.75	1209.3	956.488	766.363	962.866	1542.87	1685.23	1845.25	4.18116	3.97515	4.10087	3.88735	3.81172	3.25682	4.36959	4.44271	4.56768	NM_009414	chr7:53902665-53902606	Tph1	Mus musculus tryptophan hydroxylase 1 (Tph1), transcript variant 1, mRNA [NM_009414]	GO:0060749|GO:0004510|GO:0016491|GO:0005506|GO:0016597|GO:0043005|GO:0046872|GO:0008152|GO:0009072|GO:0016714|GO:0004497|GO:0042427|GO:0055114	NM_009414	Mm.248684	21990	ENSMUST00000049298	TC1581593
A_51_P404405	0.0706699	1.69692	down	152.831	245.827	0.917618	1.68054	180.72	216.697	184.391	73.8378	61.6155	199.727	248.077	233.461	255.942	1.22457	1.539	1.38754	0.19203	0.175054	0.987512	1.73283	1.59102	1.71776	NM_008081	chr11:95730645-95730586	B4galnt2	Mus musculus beta-1,4-N-acetyl-galactosaminyl transferase 2 (B4galnt2), mRNA [NM_008081]	GO:0005792|GO:0016740|GO:0019276|GO:0016758|GO:0016757|GO:0030173|GO:0006047|GO:0008376|GO:0016020|GO:0006486|GO:0022408|GO:0030259|GO:0016021|GO:0005794	NM_008081	Mm.340702	14422	ENSMUST00000038343	TC1589535
A_51_P371190	0.0410209	1.64931	down	1493.42	2526.09	4.31643	5.03829	1115.06	1034.74	1259.41	1939.15	1569.49	2042.69	2261.06	2586.65	2730.56	3.84986	3.79453	4.15945	4.90695	4.84591	4.34188	4.92097	5.06085	5.13306	NM_013917	chr11:43233860-43233801	Pttg1	Mus musculus pituitary tumor-transforming gene 1 (Pttg1), transcript variant 2, mRNA [NM_013917]	GO:0045143|GO:0007059|GO:0004869|GO:0007067|GO:0051276|GO:0009987|GO:0017124|GO:0051301|GO:0007049|GO:0006281|GO:0031072|GO:0001558|GO:0006974|GO:0043022|GO:0005634|GO:0006259|GO:0005737|GO:0008285	NM_013917	Mm.6856	30939	ENSMUST00000152115	TC1695491
A_51_P264685	1.67027e-05	2.46375	down	87.8646	220.449	0.222332	1.52319	78.4904	93.5258	98.6514	70.6863	53.9125	131.921	210.197	232.137	219.014	0.0214014	0.326762	0.485187	0.129101	-0.0176196	0.38916	1.49378	1.58281	1.49296	AK039124	chr4:63086792-63086733	Whrn	Mus musculus adult male hypothalamus cDNA, RIKEN full-length enriched library, clone:A230098N07 product:hypothetical protein, full insert sequence. [AK039124]	GO:0001917|GO:0005515|GO:0043025|GO:0007605|GO:0030425|GO:0030424|GO:0060122|GO:0019904|GO:0005929|GO:0007268|GO:0043005|GO:0042995|GO:0002142|GO:0032420|GO:0005884|GO:0005737|GO:0032391		Mm.300397	73750		TC1635500
A_51_P356505	0.00171317	5.03636	down	50.6745	239.678	-0.689044	1.64334	29.0855	25.6887	29.8237	76.4266	54.6341	88.3883	226.444	237.747	254.844	-1.41082	-1.53747	-1.24069	0.241745	0.00156307	-0.188591	1.60119	1.61726	1.71156	NM_026087	chr7:18652865-18654497	Ceacam12	Mus musculus carcinoembryonic antigen-related cell adhesion molecule 12 (Ceacam12), transcript variant 1, mRNA [NM_026087]	GO:0008150|GO:0003674|GO:0005575	NM_026087	Mm.46089	67315	ENSMUST00000108487	TC1578736
A_51_P440144	0.017882	1.65806	up	2813.26	1784.45	5.25532	4.52583	2411.14	2213.76	2443.82	3493.3	2788.33	3529.22	1428.96	1955.82	1968.57	4.96245	4.89175	5.11584	5.75612	5.67502	5.13076	4.25893	4.65754	4.66102	BI100969			BI100969 602886295F1 NCI_CGAP_Kid14 Mus musculus cDNA clone IMAGE:5041727 5', mRNA sequence [BI100969]			Mm.41044
A_51_P451482	1.33485e-05	3.90388	down	78.354	321.425	0.102655	2.06757	63.8031	91.838	73.1223	82.7336	72.4581	86.1687	336.492	309.909	317.876	-0.277489	0.300489	0.0531583	0.356144	0.408908	-0.225282	2.17261	1.99968	2.0304	NM_023628	chr3:95100363-95100304	Anxa9	Mus musculus annexin A9 (Anxa9), transcript variant 2, mRNA [NM_023628]	GO:0005544|GO:0008150|GO:0003674|GO:0005575|GO:0005509	NM_023628	Mm.218844	71790	ENSMUST00000107183	NP359634
A_52_P245962	0.00577746	3.96621	down	1175.57	4084.91	3.74708	5.73484	1176.16	2133.83	1336.12	419.768	372.204	1615.33	4169.43	3842.92	4242.38	3.92682	4.8387	4.24475	2.69919	2.76978	4.00324	5.80382	5.63197	5.76874	NM_021456	chr8:95826801-95826742	Ces1	Mus musculus carboxylesterase 1 (Ces1), mRNA [NM_021456]	GO:0016787|GO:0004091|GO:0005783	NM_021456	Mm.22720	12623	ENSMUST00000044602	TC1584507
A_52_P591431	0.00377213	1.5125	down	153.553	244.979	1.07533	1.67227	182.358	155.762	157.764	142.156	126.986	156.291	219.594	251.151	264.192	1.23759	1.06267	1.16254	1.13708	1.21836	0.63372	1.55688	1.69639	1.76353	NM_198102	chr6:49199039-49196959	Tra2a	Mus musculus transformer 2 alpha homolog (Drosophila) (Tra2a), mRNA [NM_198102]	GO:0003676|GO:0005634|GO:0005515|GO:0008150|GO:0008380|GO:0042802|GO:0003723|GO:0006397|GO:0000166	NM_198102	Mm.196598	101214	ENSMUST00000031841	TC1640479
A_52_P556099	0.000301631	1.88197	down	55.8484	110.982	-0.38276	0.529487	61.2428	48.1046	57.3109	56.1929	48.9712	63.2682	101.685	107.877	123.383	-0.336574	-0.632426	-0.298345	-0.201941	-0.156307	-0.670966	0.44615	0.477224	0.665086	NM_001042653	chr2:119435918-119435859	Oip5	Mus musculus Opa interacting protein 5 (Oip5), mRNA [NM_001042653]	GO:0015030|GO:0005634|GO:0005515|GO:0008150|GO:0000775|GO:0007067|GO:0000785|GO:0051301|GO:0010369|GO:0007049	NM_001042653	Mm.246412	70645	ENSMUST00000123818	TC1658894
A_51_P477682	0.0435444	3.65422	down	282.044	848.461	1.57958	3.44915	106.127	102.906	96.4262	511.812	417.668	457.324	661.374	913.642	970.367	0.456609	0.464656	0.452273	2.98521	2.93605	2.1827	3.14751	3.55946	3.64047	NM_008939	chr3:123209409-123209468	Prss12	Mus musculus protease, serine, 12 neurotrypsin (motopsin) (Prss12), mRNA [NM_008939]	GO:0005044|GO:0004252|GO:0005576|GO:0008236|GO:0008233|GO:0030425|GO:0003824|GO:0006508|GO:0031410|GO:0043195|GO:0016787|GO:0016020|GO:0045202|GO:0031638|GO:0043083	NM_008939	Mm.9431	19142	ENSMUST00000029603	TC1583499
A_51_P259296	0.00030441	7.52139	down	384.054	2609.29	2.17796	5.08896	155.125	576.994	254.935	304.249	227.324	785.696	2636.61	2509.95	2681.31	1.00424	2.95188	1.85491	2.23485	2.05844	2.96345	5.14266	5.01742	5.10681	NM_008509	chr8:71430267-71430326	Lpl	Mus musculus lipoprotein lipase (Lpl), mRNA [NM_008509]	GO:0004806|GO:0034361|GO:0005886|GO:0010744|GO:0005615|GO:0004465|GO:0003824|GO:0019432|GO:0006629|GO:0016042|GO:0016787|GO:0016020|GO:0019433|GO:0031012|GO:0008201|GO:0042627|GO:0031225|GO:0017129	NM_008509	Mm.1514	16956	ENSMUST00000015712	TC1777349
A_51_P457187	0.0629862	1.55366	down	875.656	1419.26	3.56799	4.20366	792.779	744.591	638.492	930.608	1158.82	988.648	1229.68	1566.61	1461.5	3.35773	3.31977	3.17944	3.84777	4.40827	3.29494	4.04225	4.33741	4.23132	NM_028075	chr15:82052284-82052225	Tnfrsf13c	Mus musculus tumor necrosis factor receptor superfamily, member 13c (Tnfrsf13c), mRNA [NM_028075]	GO:0004872|GO:0042102|GO:0031296|GO:0016020|GO:0001782|GO:0030890|GO:0002636|GO:0031295|GO:0050776|GO:0045078|GO:0009897|GO:0016021	NM_028075	Mm.240047	72049	ENSMUST00000109535	TC1584455
A_52_P338956	0.000719317	2.10406	down	4723.75	10354	6.00365	7.07683	3589.47	5481.49	3939.9	4936.18	4370.53	6024.95	10915.3	9920.1	10226.6	5.53651	6.19982	5.80486	6.25492	6.32343	5.90236	7.19225	7.00012	7.03812	NM_001081169	chr12:113365695-113365754	Aspg	Mus musculus asparaginase homolog (S. cerevisiae) (Aspg), mRNA [NM_001081169]	GO:0016042|GO:0016787|GO:0008150|GO:0006520|GO:0003847|GO:0004622|GO:0004067|GO:0005625	NM_001081169	Mm.77133	104816	ENSMUST00000079400	TC1602274
A_51_P339934	0.0255079	1.57986	up	162.285	105.24	1.11659	0.456791	133.229	143.793	109.172	183.385	160.892	243.238	110.326	103.004	102.39	0.784726	0.947321	0.631374	1.50447	1.55978	1.27185	0.563817	0.410538	0.396018	NM_010910	chr14:68705638-68705698	Nefl	Mus musculus neurofilament, light polypeptide (Nefl), mRNA [NM_010910]	GO:0005515|GO:0048812|GO:0005882|GO:0043524|GO:0045110|GO:0014012|GO:0000226|GO:0060052|GO:0031133|GO:0005198|GO:0030424|GO:0051258|GO:0019904|GO:0040011|GO:0043274|GO:0043005|GO:0005883|GO:0050772|GO:0045109|GO:0050885	NM_010910	Mm.1956	18039	ENSMUST00000022639	TC1577351
A_52_P665768	0.0165394	1.69928	down	964.09	1705.9	3.70505	4.46997	856.953	709.314	806.838	1210.77	981.594	1219.07	1483.82	1825.9	1808	3.47003	3.24975	3.51705	4.22745	4.16882	3.59719	4.31329	4.55837	4.53826	NM_001033310	chr5:90643845-90643786	Cox18	Mus musculus COX18 cytochrome c oxidase assembly homolog (S. cerevisiae) (Cox18), nuclear gene encoding mitochondrial protein, transcript variant 2, mRNA [NM_001033310]	GO:0016020|GO:0008150|GO:0003674|GO:0051205|GO:0005739|GO:0016021|GO:0005743	NM_001033310	Mm.319697	231430	ENSMUST00000048363	TC1621564
A_52_P560578	2.49431e-06	3.3385	down	604.298	2116.64	3.04654	4.78574	706.179	638.63	640.668	561.721	451.203	627.385	2001.12	2085.53	2263.27	3.19085	3.09831	3.18435	3.11945	3.04746	2.63883	4.74478	4.75018	4.86228	X75105	chr6:68582035-68581976		Igk protein [Source:UniProtKB/TrEMBL;Acc:A1A540] [ENSMUST00000103328]			Mm.423815		ENSMUST00000103328	NP378503
A_52_P262676	0.00657937	1.59756	down	122.197	208.435	0.732462	1.40834	113.829	120.315	101.044	126.589	102.94	168.467	147.781	231.256	246.269	0.557676	0.690148	0.519764	0.96975	0.915489	0.741945	0.9855	1.57733	1.66218		chr2:176871481-176871540		Novel KRAB box and zinc finger, C2H2 type domain containing protein [Source:UniProtKB/TrEMBL;Acc:A2ARV7] [ENSMUST00000134614]					ENSMUST00000134614
A_51_P279437	8.57176e-05	2.55593	down	875.744	2355.37	3.58463	4.93848	850.018	753.584	760.261	939.113	873.309	1078.18	2156.93	2360.55	2548.63	3.45831	3.33709	3.43127	3.8609	4.00018	3.42	4.85295	4.92889	5.03359	NM_029662	chr4:122624241-122624182	Mfsd2a	Mus musculus major facilitator superfamily domain containing 2A (Mfsd2a), mRNA [NM_029662]	GO:0016020|GO:0055085|GO:0016021|GO:0006810	NM_029662	Mm.331842	76574	ENSMUST00000030408	TC1577655
A_51_P366672	2.02898e-05	2.51457	down	133.889	354.086	0.873434	2.20375	135.417	120.261	116.555	127.444	129.905	173.749	316.878	379.351	366.031	0.808225	0.689501	0.725788	0.979458	1.25115	0.786483	2.08597	2.29137	2.2339	NM_153170	chr11:54972193-54972134	Slc36a2	Mus musculus solute carrier family 36 (proton/amino acid symporter), member 2 (Slc36a2), mRNA [NM_153170]	GO:0015187|GO:0005886|GO:0015180|GO:0015824|GO:0015992|GO:0005280|GO:0015816|GO:0015808|GO:0016020|GO:0005302|GO:0005737|GO:0016021|GO:0015193	NM_153170	Mm.291280	246049	ENSMUST00000039305	TC1582593
A_51_P434567	0.00437126	2.6541	down	1429.12	3621.79	4.15361	5.56183	838.679	2496.83	1012.09	981.483	969.327	2276.29	3749.03	3469.26	3647.08	3.43893	5.06535	3.84404	3.92456	4.15067	4.4981	5.65049	5.48439	5.55061	NM_007417	chr19:54123300-54123359	Adra2a	Mus musculus adrenergic receptor, alpha 2a (Adra2a), mRNA [NM_007417]	GO:0004872|GO:0004930|GO:0042596|GO:0005886|GO:0007186|GO:0004935|GO:0007165|GO:0004938|GO:0016020|GO:0045202|GO:0005737|GO:0004871|GO:0006260|GO:0016021	NM_007417	Mm.235195	11551	ENSMUST00000036700	TC1598908
A_52_P374897	0.0463602	1.54201	down	262.175	413.952	1.80545	2.43026	185.195	341.566	177.968	300.611	231.453	336.256	376.103	435.86	429.893	1.25986	2.19549	1.33639	2.2175	2.08441	1.73904	2.33317	2.4917	2.46592	NM_009705	chr12:80252972-80253031	Arg2	Mus musculus arginase type II (Arg2), mRNA [NM_009705]	GO:0001657|GO:0045988|GO:0005515|GO:0051001|GO:0004053|GO:0006525|GO:0005739|GO:0016813|GO:0016787|GO:0046872|GO:0000050|GO:0050998|GO:0006941	NM_009705	Mm.3506	11847	ENSMUST00000021550	TC1580867
A_52_P251690	0.00678022	1.56687	down	1273.45	2093.56	4.12309	4.77097	1231.68	1007.81	1227.39	1385.16	1225.34	1563.31	2063.75	2023.69	2193.23	3.99337	3.75647	4.1223	4.42158	4.4888	3.95601	4.78924	4.70675	4.81693	NM_029000	chr7:113301011-113300952	Gvin1	Mus musculus GTPase, very large interferon inducible 1 (Gvin1), transcript variant A, mRNA [NM_029000]	GO:0005634|GO:0008150|GO:0003674|GO:0005525|GO:0005737|GO:0000166|GO:0005575	NM_029000	Mm.458429	74558	ENSMUST00000006667	TC1590001
A_51_P121915	0.0493823	1.56268	up	121.174	81.0844	0.713635	0.0696152	106.77	87.929	100.846	143.85	136.157	151.489	89.8597	86.3821	67.0114	0.465321	0.237736	0.516932	1.15416	1.31896	0.588698	0.267787	0.156639	-0.215581	NM_145424	chr10:127314281-127314340	BC089597	Mus musculus cDNA sequence BC089597 (BC089597), mRNA [NM_145424]	GO:0008150|GO:0003674|GO:0016491|GO:0005575|GO:0055114	NM_145424	Mm.214923	216454	ENSMUST00000092058	TC1596104
A_51_P175988	0.00162095	1.83375	up	338.593	192.742	2.20272	1.32792	318.309	331.484	248.173	362.491	323.505	447.596	208.474	189.851	179.903	2.04124	2.15226	1.81612	2.48754	2.56748	2.15168	1.48191	1.2927	1.20916	M74425	chr9:48707641-48707582	Htr3a	Mouse serotonin-gated ion channel (5HT3) mRNA, complete cds. [M74425]	GO:0005230|GO:0045211|GO:0004872|GO:0005249|GO:0005886|GO:0043025|GO:0005216|GO:0030424|GO:0006810|GO:0004993|GO:0016020|GO:0030054|GO:0006811|GO:0045202|GO:0005232|GO:0005737|GO:0051378|GO:0016021		Mm.4831	15561		TC1594898
A_51_P429212	0.00155617	2.07341	down	55.9307	121.454	-0.388949	0.663056	54.524	46.7095	45.6404	68.0056	56.0926	64.6122	116.68	119.027	128.655	-0.504222	-0.674885	-0.626843	0.0733233	0.0395713	-0.64064	0.644596	0.619124	0.725447	NM_028749	chr1:155356265-155350652	Npl	Mus musculus N-acetylneuraminate pyruvate lyase (Npl), mRNA [NM_028749]	GO:0008747|GO:0016829|GO:0008150|GO:0008152|GO:0005975|GO:0005737|GO:0005575|GO:0003824	NM_028749	Mm.24887	74091	ENSMUST00000041874	TC1578705
A_52_P336159	6.24811e-05	1.7014	down	246.062	441.147	1.75588	2.5226	245.686	254.385	239.326	245.536	200.731	290.71	404.775	453.679	464.987	1.66763	1.77034	1.76375	1.92553	1.87896	1.52906	2.43916	2.54951	2.57913	NM_023220	chr2:126717525-126717466	2010106G01Rik	Mus musculus RIKEN cDNA 2010106G01 gene (2010106G01Rik), mRNA [NM_023220]	GO:0016787|GO:0016020|GO:0008150|GO:0003674|GO:0004190|GO:0008233|GO:0016021|GO:0005575	NM_023220	Mm.269928	66552	ENSMUST00000028844	TC1603540
A_52_P391743	0.027726	1.57775	down	477.531	745.766	2.61742	3.27529	514.473	584.299	512.69	287.047	239.822	726.857	853.567	679.679	704.051	2.73391	2.97003	2.86286	2.15089	2.13565	2.85115	3.51555	3.13269	3.17762	NM_020518	chr9:37347971-37348030	Vsig2	Mus musculus V-set and immunoglobulin domain containing 2 (Vsig2), mRNA [NM_020518]	GO:0005887|GO:0016020|GO:0008150|GO:0003674|GO:0016021	NM_020518	Mm.27478	57276	ENSMUST00000011257	TC1586188
A_51_P262757	0.000862279	1.74914	down	62.692	110.352	-0.28579	0.520855	62.787	63.8011	56.993	47.4947	37.8366	107.24	123.681	105.341	102.035	-0.300649	-0.225021	-0.306367	-0.444564	-0.528457	0.0903196	0.728664	0.442899	0.391001	NM_001077348	chr17:56251160-56251101	Plin5	Mus musculus perilipin 5 (Plin5), transcript variant 2, mRNA [NM_001077348]	GO:0005811	NM_001077348	Mm.254985	66968	ENSMUST00000113072	TC1586170
A_52_P682341	0.000953899	1.76525	up	40.8301	24.3934	-0.842421	-1.6623	48.6281	34.5428	40.3467	42.693	32.3667	46.4031	20.3345	26.8711	25.9745	-0.669323	-1.11022	-0.804701	-0.598331	-0.753729	-1.11822	-1.87595	-1.52804	-1.58289	AK082101	chr3:103865009-103864950	Magi3	Mus musculus 0 day neonate cerebellum cDNA, RIKEN full-length enriched library, clone:C230007H05 product:unclassifiable, full insert sequence. [AK082101]	GO:0005923|GO:0005634|GO:0005515|GO:0016020|GO:0008150|GO:0003674|GO:0030054|GO:0005886|GO:0005524|GO:0000166|GO:0005575		Mm.264849	99470
A_51_P497724	0.00521398	1.53633	down	1377.55	2157.78	4.19059	4.81007	1320.98	1546.4	1593.56	1011.57	826.831	1965.97	2399.34	2128.36	1945.63	4.09436	4.37417	4.49895	3.96813	3.92128	4.28665	5.00661	4.77951	4.64411	NM_029419	chr15:77218804-77218745	Apol7a	Mus musculus apolipoprotein L 7a (Apol7a), transcript variant 1, mRNA [NM_029419]	GO:0008150|GO:0003674|GO:0005575	NM_029419	Mm.232636	75761	ENSMUST00000109779	TC1588432
A_52_P121903	5.86875e-06	2.87937	down	47.1884	139.928	-0.663207	0.862545	39.7154	47.7101	40.573	43.7847	36.1998	75.1476	130.014	131.338	158.433	-0.961418	-0.644308	-0.796633	-0.561903	-0.59226	-0.422719	0.800707	0.761116	1.02581	NM_012061	chr14:13244144-13244085	Cadps	Mus musculus Ca2+-dependent secretion activator (Cadps), transcript variant 1, mRNA [NM_012061]	GO:0005515|GO:0015031|GO:0016050|GO:0006810|GO:0005509|GO:0008289|GO:0045956|GO:0031410|GO:0016020|GO:0046872|GO:0030054|GO:0006887|GO:0045202|GO:0050432	NM_012061	Mm.260881	27062	ENSMUST00000112658	TC1580076
A_51_P139780	0.0253889	1.51238	down	32749.3	51723.1	8.8013	9.39813	30710.3	25928.1	27449.2	39122.7	33300.7	39984.6	49867.9	52484.9	52816.5	8.63339	8.4417	8.60539	9.24146	9.2531	8.63278	9.38401	9.40359	9.40678	NM_009402	chr7:19475659-19475718	Pglyrp1	Mus musculus peptidoglycan recognition protein 1 (Pglyrp1), mRNA [NM_009402]	GO:0005576|GO:0005515|GO:0008745|GO:0005125|GO:0005615|GO:0042742|GO:0009253|GO:0005737|GO:0016019|GO:0006915|GO:0045087	NM_009402	Mm.21855	21946	ENSMUST00000032573	TC1701095
A_51_P239654	0.00205134	1.5799	down	2956.08	4926.84	5.34659	6.00642	3369.71	2831.86	2898.06	2922.44	2624.92	3089.51	4860.05	5007.01	4913.47	5.44537	5.247	5.36179	5.4987	5.58789	4.93879	6.02494	6.01371	5.98061	NM_010444	chr15:101105071-101105130	Nr4a1	Mus musculus nuclear receptor subfamily 4, group A, member 1 (Nr4a1), mRNA [NM_010444]	GO:0004872|GO:0005515|GO:0003700|GO:0046982|GO:0006350|GO:0003707|GO:0045944|GO:0006917|GO:0042803|GO:0006355|GO:0045449|GO:0030528|GO:0005634|GO:0043565|GO:0016563|GO:0046872|GO:0003677|GO:0004879|GO:0043154|GO:0008270	NM_010444	Mm.119	15370	ENSMUST00000023779	TC1779970
A_51_P263471	0.000197497	1.70593	down	236.622	423.742	1.69612	2.46667	280.658	248.638	232.781	210.269	190.516	256.872	423.985	410.658	436.583	1.85963	1.73737	1.72375	1.70184	1.8036	1.35053	2.50606	2.40577	2.4882	NM_020001	chr6:123194580-123196486	Clec4n	Mus musculus C-type lectin domain family 4, member n (Clec4n), mRNA [NM_020001]	GO:0016020|GO:0005529|GO:0005488|GO:0045087|GO:0016021	NM_020001	Mm.271782	56620	ENSMUST00000151714	TC1596868
A_51_P485731	0.0171251	1.50569	up	2048.89	1418.48	4.80061	4.21019	2553.78	2177.67	2299.08	1941.44	1482.27	1839.08	1429.91	1410.29	1415.24	5.04538	4.86804	5.02776	4.90865	4.76342	4.1904	4.25989	4.18575	4.18491	NM_031393	chr4:132811515-132811456	Sytl1	Mus musculus synaptotagmin-like 1 (Sytl1), mRNA [NM_031393]	GO:0042470|GO:0006886|GO:0017137|GO:0005515|GO:0016192|GO:0016020|GO:0005886|GO:0005624|GO:0019897|GO:0042043|GO:0006887|GO:0005625	NM_031393	Mm.25660	269589	ENSMUST00000030674	TC1585819
A_52_P364140	0.00094501	1.98909	up	1297.14	675.625	4.13171	3.1396	1756.97	1456.09	1327.91	1095.43	912.424	1234.03	700.29	654.332	672.254	4.50583	4.28735	4.23586	4.08302	4.06339	3.61479	3.22999	3.07786	3.11095	NM_010577	chr15:103175081-103175022	Itga5	Mus musculus integrin alpha 5 (fibronectin receptor alpha) (Itga5), mRNA [NM_010577]	GO:0008305|GO:0004872|GO:0005515|GO:0007229|GO:0007613|GO:0007044|GO:0007157|GO:0007155|GO:0016020|GO:0007159|GO:0005178|GO:0005737|GO:0050839|GO:0019717|GO:0009897|GO:0033631|GO:0016021	NM_010577	Mm.16234	16402	ENSMUST00000023128	TC1632950
A_51_P137433	0.0256282	2.21404	down	529.963	1159.8	2.76966	3.91634	345.037	304.487	375.93	744.576	650.853	758.896	1068.51	1147.69	1263.19	2.15756	2.02971	2.41524	3.52602	3.57602	2.91338	3.83957	3.8885	4.02094	XM_001472966	chr17:34012796-34012737		Kinesin-like protein KIFC1 [Source:UniProtKB/Swiss-Prot;Acc:Q9QWT9] [ENSMUST00000114364]		XM_001472966	Mm.335713		ENSMUST00000114364	NP378915
A_52_P303891	0.00754955	1.59102	up	1630.77	1076.84	4.47987	3.80992	1456.4	1441.86	1433.93	1883.98	1581.81	1986.63	991.577	1152.76	1086.19	4.23514	4.27318	4.34668	4.86531	4.85719	4.30173	3.73177	3.89486	3.80315	NM_011584	chr14:19037312-19037253	Nr1d2	Mus musculus nuclear receptor subfamily 1, group D, member 2 (Nr1d2), mRNA [NM_011584]	GO:0004872|GO:0003700|GO:0006350|GO:0003707|GO:0006355|GO:0004887|GO:0045449|GO:0005634|GO:0043565|GO:0046872|GO:0003677|GO:0004879|GO:0008270|GO:0005575	NM_011584	Mm.26587	353187	ENSMUST00000090543	TC1602755
A_51_P114817	4.89507e-06	2.1041	down	50.3467	108.985	-0.566524	0.50668	52.9961	45.3393	53.4073	41.0964	34.93	74.3111	114.942	103.204	108.811	-0.54523	-0.717839	-0.400116	-0.653316	-0.643773	-0.438868	0.622943	0.413332	0.483763	NM_007628	chr3:54852341-54851197	Ccna1	Mus musculus cyclin A1 (Ccna1), mRNA [NM_007628]	GO:0005634|GO:0005515|GO:0007126|GO:0007067|GO:0007275|GO:0030154|GO:0005856|GO:0005737|GO:0051301|GO:0007049|GO:0007283	NM_007628	Mm.4815	12427	ENSMUST00000029368	TC1586658
A_52_P69955	0.000459709	1.62213	down	553.613	943.078	2.92233	3.62022	557.942	541.409	470.48	563.61	490.153	698.083	988.997	898.833	941.403	2.85093	2.86005	2.73891	3.1243	3.16692	2.79288	3.72801	3.53589	3.59675	NM_021344	chr5:118511615-118511674	Tesc	Mus musculus tescalcin (Tesc), mRNA [NM_021344]	GO:0030027|GO:0019212|GO:0005634|GO:0005515|GO:0000287|GO:0001726|GO:0030219|GO:0005737|GO:0008584|GO:0006883|GO:0005509	NM_021344	Mm.273285	57816	ENSMUST00000031304	TC1633822
A_51_P290914	0.00325852	1.5144	down	58.4017	92.5766	-0.327124	0.271626	66.1795	63.9067	66.3338	49.7025	44.271	60.0167	88.7687	91.7106	97.2504	-0.224731	-0.222634	-0.0874085	-0.379011	-0.301878	-0.747082	0.250165	0.242996	0.321716	NR_027974	chr13:120276373-120276314	3110070M22Rik	Mus musculus RIKEN cDNA 3110070M22 gene (3110070M22Rik), non-coding RNA [NR_027974]	GO:0008150|GO:0003674|GO:0005575	NR_027974	Mm.46679	67304		TC1585908
A_52_P260856	0.0270502	1.55648	up	53.6212	36.6353	-0.452111	-1.0904	63.7482	61.4663	60.3495	47.0184	42.2767	46.8682	27.5192	42.9008	39.4858	-0.27873	-0.278806	-0.223812	-0.459105	-0.368378	-1.10384	-1.43945	-0.853086	-0.978655	NM_178665	chr16:24986164-24986223	Lpp	Mus musculus LIM domain containing preferred translocation partner in lipoma (Lpp), transcript variant 1, mRNA [NM_178665]	GO:0005634|GO:0005515|GO:0046872|GO:0007155|GO:0030054|GO:0005737|GO:0008270	NM_178665	Mm.209385	210126
A_51_P166339	0.0160177	2.6839	down	126.399	328.385	0.669673	2.094	71.9999	85.0153	69.0211	181.383	159.247	191.73	293.761	328.753	362.64	-0.103119	0.18912	-0.0301156	1.48864	1.54495	0.928558	1.97668	2.08484	2.22048	NM_009635	chr10:126453541-126454065	Avil	Mus musculus advillin (Avil), mRNA [NM_009635]	GO:0007015|GO:0005515|GO:0007010|GO:0006950|GO:0051693|GO:0005856|GO:0005737|GO:0003779	NM_009635	Mm.10739	11567	ENSMUST00000129173	TC1718310
A_52_P471340	0.0199953	1.71837	up	77.2776	45.6137	0.0309794	-0.750057	68.3231	64.0553	56.9866	118.574	55.3328	100.393	45.2197	48.3755	43.246	-0.178741	-0.219284	-0.30653	0.875389	0.0198956	-0.00485325	-0.722936	-0.679815	-0.847421	NR_033564	chr1:196782612-196782553	C030002c11rik	Mus musculus hypothetical LOC320400 (C030002c11rik), non-coding RNA [NR_033564]		NR_033564	Mm.417608	320400		TC1590355
A_52_P65268	0.0346687	1.59087	down	74.9018	122.583	0.00130733	0.671126	103.963	84.987	89.4138	58.5574	51.2771	61.2125	106.498	131.935	129.317	0.426881	0.188641	0.343344	-0.142478	-0.0899248	-0.718619	0.512872	0.767658	0.732849	NM_177588	chr2:21135636-21135695	Thnsl1	Mus musculus threonine synthase-like 1 (bacterial) (Thnsl1), transcript variant 1, mRNA [NM_177588]	GO:0009088|GO:0008150|GO:0004795|GO:0003674|GO:0008152|GO:0005524|GO:0004765|GO:0005575|GO:0003824|GO:0030170	NM_177588	Mm.268841	208967	ENSMUST00000102951	TC1592556
A_51_P400581	0.0354596	1.52676	down	78.7238	128.729	0.1121	0.722572	79.4646	66.1849	74.32	93.9066	76.6613	81.8054	96.7138	138.406	151.068	0.039197	-0.1721	0.0765967	0.538898	0.490259	-0.30025	0.373836	0.836742	0.957137	NM_023210	chr3:95740981-95741040	Anp32e	Mus musculus acidic (leucine-rich) nuclear phosphoprotein 32 family, member E (Anp32e), mRNA [NM_023210]	GO:0019212|GO:0005634|GO:0005515|GO:0008150|GO:0005737|GO:0016023	NM_023210	Mm.218657	66471	ENSMUST00000015893	TC1647982
A_52_P440284	0.0989654	1.60039	up	341.275	209.073	2.1077	1.42928	494.817	455.511	405.129	168.106	170.631	353.456	254.562	199.911	172.745	2.67771	2.61081	2.52316	1.37897	1.64457	1.81101	1.77006	1.36719	1.15058	BC075618	chr11:116669270-116669211		matrix-remodelling associated 7 Gene [Source:MGI Symbol;Acc:MGI:1914872] [ENSMUST00000047715]			Mm.479270		ENSMUST00000047715	TC1590958
A_52_P508991	7.65963e-06	2.15084	up	221.523	108.186	1.60149	0.496593	241.271	218.564	216.333	228.304	170.08	254.583	103.105	111.833	109.619	1.64147	1.55138	1.61803	1.82056	1.6399	1.33762	0.466155	0.529179	0.494444	NM_010231	chr1:164760096-164760037	Fmo1	Mus musculus flavin containing monooxygenase 1 (Fmo1), mRNA [NM_010231]	GO:0005792|GO:0016020|GO:0031227|GO:0050661|GO:0016491|GO:0004497|GO:0004499|GO:0016021|GO:0005783|GO:0055114|GO:0050660	NM_010231	Mm.976	14261	ENSMUST00000046049	TC1577214
A_51_P139920	0.0327254	1.52158	down	5083.54	7904.08	6.08166	6.68724	3560.59	5437.33	3763.28	4788.88	5066.4	7884.76	8369.07	7649.54	7693.65	5.52486	6.18815	5.73869	6.21122	6.53658	6.29048	6.80904	6.62514	6.62754	NM_011844	chr6:88778286-88778345	Mgll	Mus musculus monoglyceride lipase (Mgll), transcript variant 2, mRNA [NM_011844]	GO:0008289|GO:0016787|GO:0004091|GO:0045202|GO:0047372	NM_011844	Mm.272197	23945	ENSMUST00000089449	TC1607238
A_51_P154427	0.0368445	2.55555	down	44610.1	97933.6	8.96527	10.3189	29710.8	90035.6	51129.9	15394	16473.8	64916.2	102185	95064.5	96551.1	8.58565	10.2377	9.5028	7.89582	8.23772	9.33192	10.419	10.2606	10.2771	NM_027239	chr11:58239447-58239506	1810065E05Rik	Mus musculus RIKEN cDNA 1810065E05 gene (1810065E05Rik), mRNA [NM_027239]	GO:0008150|GO:0003674|GO:0005575	NM_027239	Mm.45641	69864	ENSMUST00000013797	TC1582191
A_51_P352296	0.0244978	1.63805	up	1202.21	759.274	4.02046	3.30848	976.483	962.167	939.847	1482.27	1289.81	1562.65	757.961	750.027	769.835	3.65841	3.68961	3.7372	4.51934	4.56278	3.95541	3.34416	3.27478	3.30649	NM_013834	chr8:24558112-24558171	Sfrp1	Mus musculus secreted frizzled-related protein 1 (Sfrp1), mRNA [NM_013834]	GO:0001657|GO:0060071|GO:0005515|GO:0005576|GO:0090090|GO:0090175|GO:0007275|GO:0030154|GO:0030278|GO:0016055|GO:0060687|GO:0030178|GO:0043508|GO:0048547|GO:0017147|GO:0060527|GO:0001756|GO:0009952	NM_013834	Mm.281691	20377	ENSMUST00000033952	TC1576903
A_52_P359819	0.027478	2.53983	down	36.8989	89.1383	-1.13295	0.211786	25.6804	26.0139	14.2629	53.237	43.8842	58.3148	79.0301	99.3298	89.055	-1.59045	-1.51932	-2.30489	-0.279902	-0.314537	-0.788585	0.0825162	0.358134	0.194708	NM_198190	chr7:52671758-52671817	Ntf5	Mus musculus neurotrophin 5 (Ntf5), mRNA [NM_198190]	GO:0005788|GO:0005576|GO:0007402|GO:0008052|GO:0005166|GO:0008083|GO:0042490|GO:0008344|GO:0007616|GO:0008544|GO:0005102	NM_198190	Mm.20344	78405	ENSMUST00000058879	TC1587504
A_52_P593015	0.0349258	2.85873	down	60.4832	183.648	-0.428145	1.08723	37.1733	30.9811	33.2885	82.5188	71.8352	107.102	77.0082	247.008	226.926	-1.05685	-1.26721	-1.08213	0.352393	0.396451	0.0884738	0.045125	1.6724	1.54416	NM_029320	chr14:99642159-99642218	Pibf1	Mus musculus progesterone immunomodulatory binding factor 1 (Pibf1), transcript variant 1, mRNA [NM_029320]	GO:0008150|GO:0003674|GO:0005575	NM_029320	Mm.22835	52023	ENSMUST00000022650	TC1601995
A_51_P464539	0.000573482	1.64512	down	32.4822	56.3952	-1.16751	-0.449317	35.0968	31.4449	29.1132	34.6669	26.5428	38.0287	49.5043	56.7759	62.9053	-1.13978	-1.24578	-1.27548	-0.898772	-1.03992	-1.40536	-0.592331	-0.448814	-0.306807	NM_153412	chr16:45758311-45758252	Phldb2	Mus musculus pleckstrin homology-like domain, family B, member 2 (Phldb2), mRNA [NM_153412]	GO:0016020|GO:0008150|GO:0003674|GO:0005737|GO:0005575	NM_153412	Mm.211477	208177	ENSMUST00000134802	TC1621081
A_51_P444874	0.0139757	1.61345	down	66.2217	117.386	-0.138668	0.551484	72.001	61.956	62.3122	64.0437	56.8328	80.1843	74.3121	154.224	123.622	-0.103099	-0.267358	-0.177638	-0.0132742	0.0584846	-0.329126	-0.00628901	0.992867	0.667873	NM_008702	chr11:78382020-78381961	Nlk	Mus musculus nemo like kinase (Nlk), mRNA [NM_008702]	GO:0004672|GO:0004707|GO:0005515|GO:0042169|GO:0000287|GO:0006350|GO:0018107|GO:0007243|GO:0033136|GO:0005524|GO:0016740|GO:0000166|GO:0016055|GO:0045449|GO:0030178|GO:0005634|GO:0046872|GO:0046777|GO:0004674|GO:0016301|GO:0006468|GO:0005737	NM_008702	Mm.9001	18099	ENSMUST00000017520	TC1577065
A_51_P247114	0.000368892	13.7408	down	141.092	1585.63	0.58624	4.36663	60.397	413.728	70.5158	82.5013	84.0316	135.38	1426.58	1610.09	1720.21	-0.356639	2.47201	0.000793934	0.352087	0.622692	0.426497	4.25653	4.3769	4.46645		chr17:36217148-36217089		predicted gene 8810 Pseudogene [Source:MGI Symbol;Acc:MGI:3779814] [ENSMUST00000025333]					ENSMUST00000025333	TC1586030
A_52_P638457	0.0011106	2.39063	down	25.7366	66.456	-1.5045	-0.247109	24.7654	31.4836	20.8137	24.0398	25.6183	27.6987	45.5471	74.8088	79.012	-1.64279	-1.244	-1.75962	-1.4269	-1.09106	-1.86263	-0.712527	-0.0508842	0.0220838	NM_001045526	chr11:70611565-70607342	A430084P05Rik	Mus musculus RIKEN cDNA A430084P05 gene (A430084P05Rik), mRNA [NM_001045526]	GO:0016020|GO:0008150|GO:0003674|GO:0016021|GO:0005575	NM_001045526	Mm.164325	327957	ENSMUST00000108534	TC1623091
A_51_P181691	0.000345099	1.67782	down	318.528	563.226	2.13051	2.8771	342.24	289.132	309.937	318.694	282.463	368.701	544.758	562.061	582.86	2.14582	1.95506	2.13675	2.30177	2.37175	1.87193	2.86766	2.85856	2.90509	NM_145857	chr8:91212170-91212224	Nod2	Mus musculus nucleotide-binding oligomerization domain containing 2 (Nod2), mRNA [NM_145857]	GO:0006954|GO:0032088|GO:0031398|GO:0002732|GO:0032689|GO:0008284|GO:0032735|GO:0002381|GO:0032703|GO:0044130|GO:0002227|GO:0042981|GO:0032494|GO:0007165|GO:0034136|GO:0006952|GO:0043123|GO:0090022|GO:0052033|GO:0070431|GO:0005737|GO:0071608|GO:0043410|GO:0050731|GO:0050766|GO:0005524|GO:0032695|GO:0000166|GO:0051092|GO:0016888|GO:0045089|GO:0032755|GO:0032498|GO:0032495|GO:0042742|GO:0032500|GO:…	NM_145857	Mm.222633	257632	ENSMUST00000054324	TC1582085
A_51_P376445	0.00274956	1.66252	down	236.558	414.325	1.70096	2.43433	267.778	218.054	210.378	257.687	216.003	249.446	404.726	411.2	427.047	1.79185	1.54801	1.57776	1.99522	1.98474	1.30821	2.43899	2.40768	2.45634	NM_008818		Rhox5	Mus musculus reproductive homeobox 5 (Rhox5), mRNA [NM_008818]	GO:0005634|GO:0005515|GO:0043565|GO:0003700|GO:0003677|GO:0030317|GO:0005737|GO:0035234|GO:0006355|GO:0000122	NM_008818	Mm.423066	18617		TC1576985
A_51_P375783	0.00613194	3.81806	down	816.242	2697.79	3.19543	5.12827	390.692	1473.55	757.004	374.026	333.808	1568.37	3139.01	2522.52	2431.82	2.33684	4.30455	3.42508	2.53274	2.6127	3.96068	5.39428	5.02463	4.96591	NM_009475	chr7:147282945-147283004	Prap1	Mus musculus proline-rich acidic protein 1 (Prap1), mRNA [NM_009475]	GO:0005576	NM_009475	Mm.439707	22264	ENSMUST00000026540	TC1583825
A_52_P585907	0.000718877	1.97405	up	640.389	342.854	3.13947	2.15832	682.964	573.361	644.927	709.223	573.065	658.794	322.255	375.245	331.062	3.14262	2.94277	3.19391	3.45584	3.39239	2.70931	2.11024	2.27567	2.08904	NM_001024145	chr2:120126333-120126274	Pla2g4f	Mus musculus phospholipase A2, group IVF (Pla2g4f), mRNA [NM_001024145]	GO:0005764|GO:0016042|GO:0016787|GO:0016020|GO:0008152|GO:0005737|GO:0004620|GO:0009395|GO:0004623	NM_001024145	Mm.24880	271844	ENSMUST00000054651	TC1586615
A_51_P375146	0.00179756	2.74975	down	188.362	519.169	1.29676	2.75606	128.936	200.873	107.331	213.272	176.78	302.981	469.641	523.419	564.446	0.737464	1.42961	0.606842	1.72229	1.69564	1.58871	2.6536	2.7558	2.85878	NM_007643	chr5:17288659-17288600	Cd36	Mus musculus CD36 antigen (Cd36), transcript variant 2, mRNA [NM_007643]	GO:0070892|GO:0005886|GO:0042383|GO:0006910|GO:0030169|GO:0051637|GO:0019915|GO:0006810|GO:0009612|GO:0051636|GO:0016020|GO:0006631|GO:0030301|GO:0060907|GO:0015908|GO:0042159|GO:0045177|GO:0005794|GO:0032735|GO:0005792|GO:0004872|GO:0071222|GO:0009986|GO:0044130|GO:0071223|GO:0034381|GO:0008289|GO:0043123|GO:0043410|GO:0019395|GO:0043277|GO:0042953|GO:0032755|GO:0010886|GO:0001676|GO:0007155|GO:…	NM_007643	Mm.18628	12491	ENSMUST00000082367	TC1715095
A_52_P414166	0.0694834	1.62544	up	203.227	123.871	1.34928	0.648454	244.506	225.232	213	109.204	91.9283	335.49	169.138	100.174	102.302	1.66068	1.59474	1.59563	0.75662	0.752269	1.73575	1.18024	0.370351	0.394772	AK089482	chr15:25631625-25631684	Myo10	Mus musculus B6-derived CD11 +ve dendritic cells cDNA, RIKEN full-length enriched library, clone:F730038D06 product:hypothetical protein, full insert sequence. [AK089482]	GO:0005524|GO:0016459|GO:0003774|GO:0000166			17909		TC1581619
A_51_P465888	0.0217386	1.57423	down	46.8444	76.4628	-0.665417	-0.0107706	63.986	52.7711	52.2966	38.2815	32.7571	40.974	65.7954	80.4182	83.1747	-0.27336	-0.498855	-0.430435	-0.755682	-0.736432	-1.29774	-0.181899	0.0534301	0.0961566	AK037854	chr6:146140484-146140425		Mus musculus 16 days neonate thymus cDNA, RIKEN full-length enriched library, clone:A130056F06 product:unclassifiable, full insert sequence. [AK037854]						TC1617738
A_51_P169281	0.000126296	1.5836	down	847.447	1384.18	3.51108	4.17429	845.665	756.593	738.189	793.867	650.913	1299.46	1427.18	1330.86	1394.48	3.4509	3.34284	3.38877	3.6185	3.57615	3.68932	4.25714	4.10212	4.1636	NM_133804	chr19:10932538-10932479	Tmem132a	Mus musculus transmembrane protein 132A (Tmem132a), mRNA [NM_133804]	GO:0005515|GO:0016020|GO:0043069|GO:0016021|GO:0005783|GO:0005794	NM_133804	Mm.27387	98170	ENSMUST00000120524	TC1572616
A_51_P251768	0.000486405	1.70662	down	393.819	707.264	2.43018	3.20132	456.049	401.278	389.202	401.275	294.313	420.797	644.741	691.436	785.615	2.56	2.42793	2.46529	2.63419	2.43104	2.06261	3.11076	3.15743	3.33576	NM_010130	chr17:57622843-57622902	Emr1	Mus musculus EGF-like module containing, mucin-like, hormone receptor-like sequence 1 (Emr1), mRNA [NM_010130]	GO:0004872|GO:0004888|GO:0004930|GO:0007218|GO:0005886|GO:0007186|GO:0007165|GO:0005509|GO:0016020|GO:0007166|GO:0004871|GO:0009897|GO:0016021	NM_010130	Mm.2254	13733	ENSMUST00000086763	TC1647800
A_52_P171197	0.000609006	1.99718	up	1276.1	664.077	4.08321	3.08524	1356.44	1176.19	1159.2	1055.28	853.489	2056.02	861.949	579.334	550.946	4.13257	3.97938	4.03983	4.02915	3.96706	4.35126	3.52964	2.90223	2.82385	AB041809	chr2:130865607-130865548		glial cell line derived neurotrophic factor family receptor alpha 4 Gene [Source:MGI Symbol;Acc:MGI:1341873] [ENSMUST00000074855]			Mm.198399		ENSMUST00000074855	TC1595869
A_52_P527775	0.00139143	1.96654	up	921.275	486.666	3.64067	2.66501	1191.02	950.755	1077.91	805.095	644.575	858.301	495.9	510.955	453.143	3.94494	3.6724	3.93493	3.63876	3.56204	3.09097	2.73209	2.72103	2.54191	NM_010005	chr15:82235666-82234977	Cyp2d10	Mus musculus cytochrome P450, family 2, subfamily d, polypeptide 10 (Cyp2d10), mRNA [NM_010005]	GO:0005792|GO:0005506|GO:0009055|GO:0046872|GO:0016020|GO:0020037|GO:0016712|GO:0016491|GO:0004497|GO:0070330|GO:0005783|GO:0055114	NM_010005	Mm.174372	13101	ENSMUST00000100382	TC1601930
A_51_P429567	0.00922196	1.61158	up	4802.53	3124.02	6.02685	5.33837	4335.27	4546.17	3671.03	4687.35	4906.34	6669.01	3643.34	3018.25	2710.47	5.80886	5.92991	5.70289	6.1803	6.49026	6.04888	5.60923	5.28348	5.12241	NM_053106	chr1:137263311-137263369	Lmod1	Mus musculus leiomodin 1 (smooth muscle) (Lmod1), mRNA [NM_053106]	GO:0008150|GO:0003674|GO:0005856|GO:0005737|GO:0005523|GO:0005575	NM_053106	Mm.180124	93689	ENSMUST00000059352	TC1583913
A_52_P15536	0.0706893	1.51106	down	1070.55	1648.28	3.82433	4.4199	792.584	821.618	762.64	1310.68	1087.96	1647.83	1427.5	1730.83	1786.5	3.35738	3.46179	3.43578	4.34184	4.31724	4.03198	4.25746	4.48123	4.521	NM_133349	chr5:139947258-139947199	Zfand2a	Mus musculus zinc finger, AN1-type domain 2A (Zfand2a), transcript variant 1, mRNA [NM_133349]	GO:0005634|GO:0046872|GO:0005737|GO:0008270	NM_133349	Mm.24521	100494	ENSMUST00000110851	TC1572863
A_52_P215798	0.0107596	1.53513	down	54.6908	87.576	-0.426956	0.191405	51.6909	41.5925	51.8634	64.0064	48.8892	70.1026	82.776	89.1823	90.7696	-0.581205	-0.842278	-0.442436	-0.0141129	-0.158724	-0.522978	0.149327	0.202665	0.222221	NM_025687	chr9:50365584-50365525	Tex12	Mus musculus testis expressed gene 12 (Tex12), mRNA [NM_025687]	GO:0005515|GO:0000795	NM_025687	Mm.442255	66654	ENSMUST00000034568	TC1585575
A_51_P462153	0.0730158	1.51392	down	213.351	357.397	1.54865	2.14694	213.023	179.167	188.946	247.445	210.316	241.21	210.934	421.293	439.965	1.46182	1.26463	1.42275	1.93671	1.94625	1.25977	1.49883	2.44266	2.49933	NM_022314	chr3:89893733-89893942	Tpm3	Mus musculus tropomyosin 3, gamma (Tpm3), mRNA [NM_022314]	GO:0043005|GO:0031941|GO:0030863|GO:0005856|GO:0005737|GO:0002102|GO:0003779|GO:0032154|GO:0030426	NM_022314	Mm.240839	59069	ENSMUST00000121503	TC1758426
A_52_P593784	0.0357837	1.59286	down	40.9028	71.3597	-0.839341	-0.167721	43.1713	32.355	39.104	47.6544	35.5106	47.6213	44.0273	89.1508	80.9011	-0.841044	-1.20461	-0.849837	-0.439721	-0.619991	-1.08084	-0.761489	0.202155	0.0561714	NM_001024846	chr11:49030898-49030957	Zfp62	Mus musculus zinc finger protein 62 (Zfp62), transcript variant 2, mRNA [NM_001024846]	GO:0003676|GO:0005634|GO:0046872|GO:0006350|GO:0008270|GO:0045449|GO:0005622	NM_001024846	Mm.16650	22720	ENSMUST00000136539	TC1596269
A_51_P358256	0.0298053	1.96889	up	231.63	121.714	1.62367	0.646286	170.412	173.777	170.836	258.534	327.626	288.595	133.229	138.19	93.7233	1.13984	1.22056	1.27738	1.99995	2.58574	1.51853	0.835951	0.834488	0.26842	NM_009803	chr1:173147776-173147835	Nr1i3	Mus musculus nuclear receptor subfamily 1, group I, member 3 (Nr1i3), mRNA [NM_009803]	GO:0004872|GO:0005515|GO:0003700|GO:0006350|GO:0003707|GO:0006355|GO:0045449|GO:0005634|GO:0043565|GO:0046872|GO:0005829|GO:0003677|GO:0004879|GO:0016481|GO:0008270	NM_009803	Mm.3077	12355	ENSMUST00000111328	TC1593157
A_52_P492112	0.0125085	2.05891	down	53.9787	110.431	-0.515268	0.526611	40.7947	36.6501	34.7331	64.6736	54.5515	92.4691	106.507	113.097	111.69	-0.922732	-1.02478	-1.02084	0.000846386	-0.000621796	-0.123474	0.512993	0.545399	0.521441	NM_172641	chr19:56557170-56560176	9930023K05Rik	Mus musculus RIKEN cDNA 9930023K05 gene (9930023K05Rik), transcript variant 1, mRNA [NM_172641]	GO:0008150|GO:0003674|GO:0005575	NM_172641	Mm.156742	226245	ENSMUST00000039666	TC1606828
A_51_P413005	3.11589e-06	1.85668	down	705.413	1368.69	3.26588	4.15861	724.595	801.105	699.708	608.475	537.565	861.028	1369.26	1353.04	1383.79	3.22799	3.42532	3.31153	3.2348	3.30013	3.09554	4.19737	4.12596	4.15249	NM_023543	chr6:54250220-54250279	Chn2	Mus musculus chimerin (chimaerin) 2 (Chn2), transcript variant 1, mRNA [NM_023543]	GO:0030675|GO:0046872|GO:0016020|GO:0008150|GO:0019717|GO:0005096|GO:0007165|GO:0005622	NM_023543	Mm.321147	69993	ENSMUST00000146114	TC1589556
A_52_P222775	0.0504151	1.54595	up	1252.59	838.29	4.0763	3.44781	974.811	1138.47	891.354	1606.39	1330.15	1574.39	756.289	878.474	880.108	3.65594	3.93235	3.66077	4.63535	4.60721	3.9662	3.34098	3.50283	3.49962	NM_016693	chr4:132808672-132808731	Map3k6	Mus musculus mitogen-activated protein kinase kinase kinase 6 (Map3k6), mRNA [NM_016693]	GO:0004672|GO:0005515|GO:0046872|GO:0004674|GO:0005524|GO:0016740|GO:0016301|GO:0006468|GO:0000166|GO:0004709	NM_016693	Mm.36640	53608	ENSMUST00000030677	TC1583361
A_52_P9795	0.0895862	1.50118	down	62.1422	92.7892	-0.314189	0.271908	96.2855	74.3838	71.2409	45.3573	30.8822	54.7034	83.1335	97.804	97.4302	0.316204	-0.003613	0.015554	-0.510996	-0.821466	-0.880815	0.155543	0.335801	0.324381	NM_011574	chr8:109422019-109422078	Cirh1a	Mus musculus cirrhosis, autosomal recessive 1A (human) (Cirh1a), mRNA [NM_011574]	GO:0005634|GO:0008150|GO:0003674|GO:0005575	NM_011574	Mm.10665	21771	ENSMUST00000047629	TC1574425
A_52_P671002	0.00641984	1.71385	down	112.559	200.032	0.604978	1.38222	148.965	119.507	129.528	98.2693	78.2137	100.874	187.169	200.316	212.611	0.945785	0.68042	0.878038	0.604411	0.519182	0.00203228	1.32638	1.37011	1.45015	NM_026021	chr2:24805565-24807049	Zmynd19	Mus musculus zinc finger, MYND domain containing 19 (Zmynd19), mRNA [NM_026021]	GO:0046872|GO:0016020|GO:0008150|GO:0003674|GO:0005886|GO:0005624|GO:0005737|GO:0019717|GO:0008270	NM_026021	Mm.296106	67187	ENSMUST00000028350	TC1583329
A_51_P203062	0.0189501	1.85668	up	811.046	453.077	3.44023	2.54751	684.237	682.44	527.694	891.907	957.587	1122.41	529.039	463.248	366.943	3.14531	3.19403	2.90448	3.78649	4.13309	3.47801	2.82542	2.57962	2.2375	NM_010135	chr1:183835744-183835685	Enah	Mus musculus enabled homolog (Drosophila) (Enah), transcript variant 1, mRNA [NM_010135]	GO:0007399|GO:0008154|GO:0030154|GO:0030036|GO:0006928|GO:0015629|GO:0005829|GO:0005522|GO:0005856|GO:0045202|GO:0046907|GO:0005925|GO:0007015|GO:0005515|GO:0030175|GO:0007275|GO:0017124|GO:0001843|GO:0001725|GO:0030027|GO:0030054|GO:0042995|GO:0005737|GO:0007411|GO:0003779	NM_010135	Mm.389224	13800	ENSMUST00000078719	NP380135
A_51_P185593	0.0167002	2.05968	up	2068.4	1053.53	4.79036	3.74794	1669.01	1659.86	1422.51	2249.82	2668.93	2740.27	1335.66	1036.8	788.135	4.43173	4.47631	4.33514	5.12134	5.61188	4.76573	4.16152	3.74191	3.34038	NM_201639	chr7:74875424-74875365	Synm	Mus musculus synemin, intermediate filament protein (Synm), transcript variant 1, mRNA [NM_201639]	GO:0030674|GO:0005515|GO:0005882|GO:0008150|GO:0030054|GO:0030018|GO:0005624|GO:0019215|GO:0005856|GO:0005737|GO:0005198|GO:0060053	NM_201639	Mm.60526	233335		TC1583248
A_51_P110323	0.00477213	1.55846	down	2212.3	3614.92	4.91788	5.558	2764.55	2180.75	2346.77	2121.63	1698.18	2161.95	3375.28	3657.59	3811.91	5.15978	4.87008	5.05738	5.0367	4.95961	4.42374	5.49898	5.56066	5.61438	NM_008137	chr19:16683973-16684032	Gna14	Mus musculus guanine nucleotide binding protein, alpha 14 (Gna14), mRNA [NM_008137]	GO:0006471|GO:0005525|GO:0007186|GO:0019001|GO:0005834|GO:0004871|GO:0000166|GO:0007165|GO:0003924	NM_008137	Mm.313181	14675	ENSMUST00000025602	TC1581669
A_51_P270286	0.00440539	1.54395	down	582.947	949.104	3.00156	3.62818	538.567	583.347	525.639	651.827	528.501	669.802	897.673	925.319	1024.32	2.79994	2.96768	2.89885	3.33409	3.2756	2.73322	3.58823	3.57779	3.71853	NM_146229	chr9:114632464-114632523	Dync1li1	Mus musculus dynein cytoplasmic 1 light intermediate chain 1 (Dync1li1), mRNA [NM_146229]	GO:0005868|GO:0005515|GO:0046605|GO:0030286|GO:0005524|GO:0005874|GO:0007018|GO:0003774|GO:0000166|GO:0003777	NM_146229	Mm.128627	235661	ENSMUST00000047404
A_51_P148105	0.0168128	1.51812	down	337.954	542.912	2.21204	2.81433	345.003	278.6	307.569	389.097	323.528	383.926	453.995	583.693	591.047	2.15742	1.90152	2.12569	2.58973	2.56758	1.93031	2.60472	2.91305	2.92521	NM_011234	chr2:118961264-118961323	Rad51	Mus musculus RAD51 homolog (S. cerevisiae) (Rad51), mRNA [NM_011234]	GO:0007131|GO:0005515|GO:0005524|GO:0000795|GO:0000794|GO:0008094|GO:0000166|GO:0000800|GO:0006281|GO:0000793|GO:0003684|GO:0006974|GO:0000724|GO:0005634|GO:0007126|GO:0003677|GO:0006259|GO:0017111	NM_011234	Mm.330492	19361	ENSMUST00000152327	TC1576631
A_51_P418081	0.00376929	1.65563	up	100.477	64.7064	0.46188	-0.2655	105.444	86.5129	92.9301	109.315	88.6696	119.989	49.6821	72.2327	72.2045	0.447292	0.214313	0.398993	0.758093	0.7002	0.252389	-0.587159	-0.10144	-0.107899	AK035477	chr16:18333751-18333692	9530053J19Rik	Mus musculus adult male urinary bladder cDNA, RIKEN full-length enriched library, clone:9530053J19 product:unclassifiable, full insert sequence. [AK035477]	GO:0008150|GO:0003674|GO:0005575		Mm.443005	53961		TC1624799
A_52_P941128	0.00809807	1.5124	up	121.01	84.3529	0.73189	0.135053	125.556	134.567	137.734	105.862	103.646	118.695	77.768	91.9004	83.3902	0.699143	0.851654	0.966664	0.711783	0.925353	0.236746	0.0592909	0.245978	0.0998893	CF546364	chr10:43176011-43176078		lae72b04.y1 Gastric Epithelial Progenitor Mus musculus cDNA 5', mRNA sequence [CF546364]			Mm.418907			TC1705198
A_51_P273800	0.0769323	2.06755	up	109.564	47.6601	0.362025	-0.685894	182.985	154.989	146.207	54.2407	34.1038	84.8578	49.4686	45.8637	47.6481	1.24254	1.05549	1.05279	-0.252954	-0.678305	-0.247399	-0.593374	-0.75674	-0.707569	NM_018760	chr5:89626676-89626735	Slc4a4	Mus musculus solute carrier family 4 (anion exchanger), member 4 (Slc4a4), transcript variant 1, mRNA [NM_018760]	GO:0005215|GO:0005886|GO:0015701|GO:0006820|GO:0006885|GO:0006810|GO:0008509|GO:0005887|GO:0015293|GO:0016020|GO:0006814|GO:0006811|GO:0008510|GO:0015380|GO:0016021|GO:0005452	NM_018760	Mm.41044	54403	ENSMUST00000130041	TC1586481
A_51_P195958	0.00640625	1.75274	down	10585.5	19418.8	7.1712	7.98081	10494.2	8199.95	8797.57	12631.2	10511.7	12878.4	17319.4	20261.5	20675.4	7.08426	6.78087	6.96381	7.61045	7.58954	6.99829	7.85828	8.03043	8.05372	NM_009344	chr10:110945310-110945369	Phlda1	Mus musculus pleckstrin homology-like domain, family A, member 1 (Phlda1), mRNA [NM_009344]	GO:0031410|GO:0005634|GO:0016020|GO:0045210|GO:0005737|GO:0006917|GO:0006915	NM_009344	Mm.3117	21664	ENSMUST00000020424	TC1712193
A_51_P134228	0.0015871	2.2685	up	150.276	69.8024	1.02569	-0.156046	124.216	182.783	109.08	147.427	148.629	189.522	82.6346	72.3681	54.4047	0.683665	1.29346	0.630167	1.1896	1.44541	0.911849	0.14686	-0.0987387	-0.516258	NM_172563	chr11:90200037-90199978	Hlf	Mus musculus hepatic leukemia factor (Hlf), mRNA [NM_172563]	GO:0005634|GO:0043565|GO:0003700|GO:0006350|GO:0003677|GO:0048511|GO:0046983|GO:0006355|GO:0045449	NM_172563	Mm.158903	217082	ENSMUST00000004051	TC1577248
A_51_P375138	4.24229e-05	3.41738	down	208.653	728.765	1.47515	3.24804	164.59	246.752	143.418	208.668	175.011	313.482	726.236	691.371	768.687	1.08969	1.72639	1.025	1.69081	1.68113	1.63787	3.28248	3.1573	3.30434	L23108	chr5:17291542-17289110	Cd36	Mus musculus CD36 antigen mRNA, complete cds. [L23108]	GO:0070892|GO:0005886|GO:0042383|GO:0006910|GO:0030169|GO:0051637|GO:0019915|GO:0006810|GO:0009612|GO:0051636|GO:0016020|GO:0006631|GO:0030301|GO:0060907|GO:0015908|GO:0042159|GO:0045177|GO:0005794|GO:0032735|GO:0005792|GO:0004872|GO:0071222|GO:0009986|GO:0044130|GO:0071223|GO:0034381|GO:0008289|GO:0043123|GO:0043410|GO:0019395|GO:0043277|GO:0042953|GO:0032755|GO:0010886|GO:0001676|GO:0007155|GO:…		Mm.18628	12491
A_51_P289796	0.00150333	2.2823	down	721.678	1700.59	3.28141	4.47189	680.666	540.821	535.907	885.672	728.896	958.102	1690.96	1700.94	1709.88	3.13776	2.85848	2.92676	3.77637	3.7394	3.24966	4.50181	4.4561	4.45777	NM_177305	chr1:90596861-90596802	Arl4c	Mus musculus ADP-ribosylation factor-like 4C (Arl4c), mRNA [NM_177305]	GO:0005634|GO:0008150|GO:0003674|GO:0007264|GO:0005525|GO:0000166|GO:0005575|GO:0005622	NM_177305	Mm.27968	320982		TC1642265
A_51_P423000	0.00793116	2.63092	down	98.5351	241.141	0.257564	1.65313	92.5762	187.079	93.1842	49.4957	41.3951	127.481	238.454	233.647	251.322	0.259527	1.32697	0.402933	-0.385028	-0.39878	0.339762	1.67576	1.59216	1.69148	NM_007417	chr19:54121975-54122034	Adra2a	Mus musculus adrenergic receptor, alpha 2a (Adra2a), mRNA [NM_007417]	GO:0004872|GO:0004930|GO:0042596|GO:0005886|GO:0007186|GO:0004935|GO:0007165|GO:0004938|GO:0016020|GO:0045202|GO:0005737|GO:0004871|GO:0006260|GO:0016021	NM_007417	Mm.235195	11551	ENSMUST00000036700	TC1598908
A_52_P334188	0.00566659	1.51095	down	9779.68	15411.4	7.05446	7.64991	11848.5	10614.5	11098.2	8194.04	7066.69	9856.16	14518.9	15276	16439.4	7.25938	7.15322	7.29896	6.9861	7.01665	6.61244	7.60383	7.62296	7.72295	NM_018754	chr4:133157058-133156999	Sfn	Mus musculus stratifin (Sfn), mRNA [NM_018754]	GO:0005634|GO:0005576|GO:0005515|GO:0043616|GO:0051726|GO:0043588|GO:0030307|GO:0005737|GO:0000079|GO:0030216|GO:0019904|GO:0008285	NM_018754	Mm.44482	55948	ENSMUST00000057311	TC1695351
A_52_P485573	3.89571e-05	2.66923	up	3362.65	1338.92	5.53209	4.11567	3295.03	3195.73	3201.38	3579.46	3041.44	3862.87	1297.48	1563.37	1155.91	5.41303	5.4214	5.5054	5.79127	5.80037	5.26108	4.11968	4.33443	3.8929	NM_153484	chr15:81656928-81656987	Tef	Mus musculus thyrotroph embryonic factor (Tef), transcript variant 2, mRNA [NM_153484]	GO:0005515|GO:0003700|GO:0006350|GO:0045944|GO:0003690|GO:0006355|GO:0046983|GO:0045449|GO:0005634|GO:0016563|GO:0043565|GO:0003677|GO:0048511	NM_153484	Mm.270278	21685	ENSMUST00000023024	NP1303265
A_51_P496905	0.0104473	2.7931	down	118.527	321.269	0.582436	2.0643	84.2192	64.1787	69.0947	168.504	138.787	186.379	296.332	317.204	350.27	0.123034	-0.216507	-0.0285788	1.38238	1.34656	0.887722	1.98925	2.03325	2.17041	NM_007686	chr3:129578111-129578170	Cfi	Mus musculus complement component factor i (Cfi), mRNA [NM_007686]	GO:0005044|GO:0006508|GO:0006958|GO:0005576|GO:0004252|GO:0016787|GO:0016020|GO:0008236|GO:0008233|GO:0045087|GO:0003824	NM_007686	Mm.117180	12630	ENSMUST00000077918	TC1579989
A_52_P250865	0.0259958	2.05177	down	306.565	630.036	1.99391	3.03078	228.64	178.36	214.792	406.962	355.409	455.225	539.758	648.129	702.221	1.56389	1.25812	1.60771	2.65449	2.70317	2.17606	2.85435	3.06412	3.17387	CJ243128	chr14:29340427-29340486	Wnt5a	wingless-related MMTV integration site 5A Gene [Source:MGI Symbol;Acc:MGI:98958] [ENSMUST00000063465]	GO:0060071|GO:0007254|GO:0051216|GO:0071425|GO:0043507|GO:0060070|GO:0050679|GO:0016055|GO:0001667|GO:0048547|GO:0060762|GO:0006468|GO:0008584|GO:0048850|GO:0008284|GO:0003401|GO:0007275|GO:0042733|GO:0001843|GO:0007165|GO:0090009|GO:0007442|GO:0007223|GO:0005737|GO:0030326|GO:0004871|GO:0005102|GO:0035121|GO:0009887|GO:0030154|GO:0030514|GO:0030324|GO:0005578|GO:0060599|GO:0060026|GO:0060686|GO:…		Mm.417479	22418	ENSMUST00000063465
A_52_P331930	0.00916326	1.60157	down	679.246	1154.71	3.22257	3.90206	746.194	603.361	659.681	774.364	602.992	688.882	975.498	1161.79	1326.85	3.27036	3.01635	3.22654	3.58261	3.46583	2.77374	3.70818	3.90612	4.09188	NM_198937	chr17:25079732-25079673	Hn1l	Mus musculus hematological and neurological expressed 1-like (Hn1l), mRNA [NM_198937]	GO:0005634|GO:0005737	NM_198937	Mm.371601	52009	ENSMUST00000024981	TC1572290
A_52_P223127	0.000919014	1.96174	up	210.539	113.325	1.52374	0.551609	266.259	218.646	214.582	172.059	176.278	215.408	134.453	107.183	98.3389	1.78364	1.55192	1.60631	1.4125	1.69154	1.09655	0.84914	0.467915	0.337774	NM_080451	chr3:122815557-122815498	Synpo2	Mus musculus synaptopodin 2 (Synpo2), mRNA [NM_080451]	GO:0005634|GO:0005515|GO:0030018|GO:0005737|GO:0003779	NM_080451	Mm.34359	118449	ENSMUST00000051443	TC1602471
A_51_P322972	0.063285	1.99861	down	1361.97	2437.47	3.98737	4.98636	849.206	2542.08	1459.01	604.756	559.46	2157.3	2709.46	2379	2223.94	3.45693	5.09126	4.37169	3.22595	3.35772	4.42064	5.18197	4.94012	4.83699	NM_145419	chr10:61845981-61845922	Hkdc1	Mus musculus hexokinase domain containing 1 (Hkdc1), mRNA [NM_145419]	GO:0008150|GO:0003674|GO:0006096|GO:0005524|GO:0016740|GO:0016301|GO:0005975|GO:0004396|GO:0016773|GO:0000166|GO:0005575	NM_145419	Mm.213213	216019	ENSMUST00000020277	TC1587311
A_52_P223971	0.0182884	1.65333	down	56.136	91.6841	-0.471096	0.254278	51.4595	55.5786	74.8463	35.5297	29.91	89.4919	101.982	86.271	86.7988	-0.587677	-0.424072	0.0867782	-0.863302	-0.867614	-0.17069	0.450362	0.154784	0.157687		chr5:113704255-113704196								TC1657059
A_51_P164420	0.00198914	1.51947	down	1248.49	1994.31	4.09687	4.70044	1460.64	1275.04	1241.17	1244	968.678	1301.39	1887.86	1998.88	2096.18	4.23934	4.0958	4.1384	4.26651	4.14971	3.69146	4.66072	4.68896	4.75163	NM_025380	chr13:38738137-38738078	Eef1e1	Mus musculus eukaryotic translation elongation factor 1 epsilon 1 (Eef1e1), mRNA [NM_025380]	GO:0043065|GO:0005634|GO:0005515|GO:0006412|GO:0005737|GO:0003746|GO:0017101|GO:0009790|GO:0043517|GO:0006281|GO:0008285	NM_025380	Mm.478848	66143	ENSMUST00000001757	TC1578294
A_52_P279391	0.00040176	1.6129	up	81.7912	53.3358	0.158428	-0.53123	97.7266	78.9921	83.988	74.9345	61.1311	93.9749	45.542	56.0668	58.3986	0.337636	0.0831065	0.25303	0.2133	0.163666	-0.100171	-0.712689	-0.466947	-0.414054	AK030352	chr5:76664637-76664578	Clock	Mus musculus adult male pituitary gland cDNA, RIKEN full-length enriched library, clone:5330400M04 product:circadian locomoter output cycles kaput, full insert sequence. [AK030352]	GO:0005515|GO:0003700|GO:0006350|GO:0016740|GO:0045944|GO:0007623|GO:0006355|GO:0007165|GO:0045449|GO:0030528|GO:0005634|GO:0005667|GO:0008134|GO:0008415|GO:0003677|GO:0004402|GO:0048511|GO:0005737|GO:0004871		Mm.3552	12753		TC1611403
A_51_P116039	9.8574e-06	4.61563	down	229.666	1082.44	1.61	3.81652	160.15	304.549	213.956	214.003	161.6	323.736	1058.74	1001.73	1186.84	1.05024	2.03	1.60209	1.72723	1.56611	1.6843	3.82632	3.69226	3.93099	NM_008256	chr3:98113963-98114021	Hmgcs2	Mus musculus 3-hydroxy-3-methylglutaryl-Coenzyme A synthase 2 (Hmgcs2), nuclear gene encoding mitochondrial protein, mRNA [NM_008256]	GO:0008610|GO:0008152|GO:0016740|GO:0008299|GO:0006694|GO:0004421|GO:0016126|GO:0005739|GO:0006695|GO:0003824|GO:0005743	NM_008256	Mm.289131	15360	ENSMUST00000120541	NP358738
A_51_P489268	0.0453419	1.67768	down	1187.81	2032.17	3.9745	4.72096	913.251	792.701	902.005	1551.52	1259.02	1708.34	1790.85	2311.25	1994.41	3.56182	3.4101	3.67791	4.58521	4.52792	4.08401	4.58461	4.89844	4.67983	NM_019438	chr5:46091297-46091355	Ncapg	Mus musculus non-SMC condensin I complex, subunit G (Ncapg), mRNA [NM_019438]	GO:0008150|GO:0003674|GO:0005575	NM_019438	Mm.32012	54392	ENSMUST00000117396	TC1604146
A_52_P310652	0.0382741	1.89234	down	32.3407	61.8429	-1.24193	-0.321766	23.3401	26.5285	18.1873	38.1488	41.0006	46.8389	51.3388	70.5328	63.6572	-1.7283	-1.49106	-1.95422	-0.760692	-0.412595	-1.10474	-0.539838	-0.135797	-0.289664	NM_001177568	chr2:177262365-177262424	Gm14420	Mus musculus predicted gene 14420 (Gm14420), mRNA [NM_001177568]	GO:0046872|GO:0008150|GO:0003674|GO:0005575	NM_001177568	Mm.386029	628308	ENSMUST00000099002	TC1603944
A_51_P311919	0.0824314	2.25885	down	40.1373	82.351	-1.08996	0.0856311	17.3235	28.7586	15.3188	49.5369	54.3725	75.5139	68.084	79.0555	99.9135	-2.15838	-1.37461	-2.20185	-0.383826	-0.00536251	-0.415705	-0.132571	0.0287728	0.360692	NM_008731	chr3:82342734-82342675	Npy2r	Mus musculus neuropeptide Y receptor Y2 (Npy2r), mRNA [NM_008731]	GO:0004930|GO:0005886|GO:0051048|GO:0007204|GO:0001601|GO:0002793|GO:0046010|GO:0001662|GO:0016020|GO:0031645|GO:0007263|GO:0051967|GO:0051930|GO:0016021|GO:0004872|GO:0042755|GO:0007218|GO:0033603|GO:0050805|GO:0007186|GO:0045987|GO:0045785|GO:0007165|GO:0005887|GO:0005624|GO:0030818|GO:0004871|GO:0004983|GO:0046903	NM_008731	Mm.1433	18167	ENSMUST00000029633	TC1583767
A_52_P213916	0.0697376	4.88	down	236.049	732.547	0.967487	3.25437	49.0372	41.2882	53.0113	476.725	371.589	424.643	691.152	713.838	792.65	-0.657239	-0.852873	-0.410852	2.88276	2.7674	2.07573	3.21105	3.20343	3.34862	NM_194268	chr18:64546120-64546179	Onecut2	Mus musculus one cut domain, family member 2 (Onecut2), mRNA [NM_194268]	GO:0045165|GO:0031018|GO:0001889|GO:0003700|GO:0006350|GO:0048935|GO:0030512|GO:0030335|GO:0045944|GO:0006355|GO:0045449|GO:0042384|GO:0031016|GO:0005634|GO:0043565|GO:0001952|GO:0003677|GO:0002064|GO:0009653	NM_194268	Mm.234723	225631	ENSMUST00000056719	TC1588943
A_52_P111031	0.015373	1.97404	up	87.8615	43.8764	0.17426	-0.806891	67.9398	52.8317	63.9702	96.9639	81.8198	163.644	47.1192	43.5067	41.0034	-0.186858	-0.497197	-0.139754	0.585117	0.584211	0.70004	-0.663572	-0.832854	-0.924246	NM_001013753	chr14:84933861-84933920	Pcdh17	Mus musculus protocadherin 17 (Pcdh17), mRNA [NM_001013753]	GO:0005515|GO:0016020|GO:0007155|GO:0005886|GO:0016021	NM_001013753	Mm.153643	219228	ENSMUST00000071370	NP1275298
A_52_P130362	0.0339579	2.37375	down	65.9988	150.403	-0.276441	0.970725	42.5079	37.0715	35.6342	101.208	86.2127	93.3589	145.167	144.183	161.859	-0.863383	-1.00829	-0.983892	0.646918	0.659661	-0.109658	0.959757	0.89574	1.05668	U29631	chr6:68880502-68880443		Mus musculus anti-DNA antibody Ig kappa chain mRNA, V-J region, hybridoma 52.45, partial cds. [U29631]			Mm.445914		ENSMUST00000103338
A_52_P614133	0.00474059	1.57875	down	208.35	344.72	1.49803	2.15681	257.64	228.834	225.84	181.556	140.867	215.361	283.887	387.382	362.891	1.73617	1.61763	1.68008	1.49001	1.36802	1.09624	1.92736	2.32159	2.22148	AK028977	chr1:172124670-172124611		U2AF homology motif (UHM) kinase 1 Gene [Source:MGI Symbol;Acc:MGI:1341908] [ENSMUST00000027979]			Mm.209150		ENSMUST00000027979	TC1602193
A_52_P402786	0.00799007	1.60354	down	1212.79	2015.98	4.03222	4.71348	1460.86	1450.25	1408.77	960.624	824.928	1171.32	1813.48	2146.08	2088.38	4.23956	4.28155	4.32114	3.89357	3.91796	3.53954	4.60273	4.79147	4.74625	NM_008935	chr5:44397469-44397410	Prom1	Mus musculus prominin 1 (Prom1), transcript variant 1, mRNA [NM_008935]	GO:0008150|GO:0005886|GO:0005615|GO:0016324|GO:0009986|GO:0005887|GO:0003674|GO:0016020|GO:0042995|GO:0032420|GO:0016021|GO:0005902|GO:0005903	NM_008935	Mm.6250	19126	ENSMUST00000087442	NP674589
A_51_P438967	0.00038915	1.90458	down	98.5294	198.752	0.441898	1.37137	102.187	99.3381	94.8249	102.327	89.0196	103.48	179.749	211.676	204.832	0.402022	0.413746	0.428113	0.662788	0.705883	0.0388341	1.26803	1.44969	1.39638	NM_053110	chr6:49006386-49006445	Gpnmb	Mus musculus glycoprotein (transmembrane) nmb (Gpnmb), mRNA [NM_053110]	GO:0031410|GO:0005887|GO:0016020|GO:0007155|GO:0005178|GO:0016023|GO:0016021|GO:0008201	NM_053110	Mm.302602	93695	ENSMUST00000031840	TC1573833
A_52_P404979	0.0179649	1.60942	up	214.985	138.525	1.5365	0.849961	176.894	163.888	185.692	248.034	213.49	301.911	146.791	144.756	124.03	1.1937	1.13604	1.39768	1.94014	1.96786	1.58361	0.975803	0.901456	0.672626		chr7:107653075-107653130
A_51_P117903	0.0125933	2.44418	down	207.312	497.707	1.40385	2.6932	306.582	273.635	273.932	144.203	112.196	133.326	449.576	483.896	559.65	1.98708	1.87558	1.95859	1.1577	1.03971	0.404441	2.59061	2.64253	2.84646	BC092269	chr12:115232853-115232794	LOC630322	H4a-3 coding region Precursor; Fragment [Source:UniProtKB/TrEMBL;Acc:A0N8M6] [ENSMUST00000103467]			Mm.342177	630322	ENSMUST00000103467	NP614298
A_51_P151182	0.0121484	1.69051	down	1157.16	2037.16	3.97106	4.72852	920.01	923.95	1046.33	1420.72	1137.8	1494.13	1834.48	2182.41	2094.59	3.57246	3.63114	3.89205	4.45814	4.38186	3.89072	4.61934	4.81569	4.75053	NM_011940	chr1:175893982-175892953	Ifi202b	Mus musculus interferon activated gene 202B (Ifi202b), transcript variant 2, mRNA [NM_011940]	GO:0005634|GO:0005737	NM_011940	Mm.218770	26388	ENSMUST00000000266	TC1584358
A_51_P257550	0.0226781	1.77373	down	5101.69	9344.94	6.09475	6.92154	4401.89	3636.93	3861.06	6876.85	5297.16	6536.23	7967.64	10247.7	9819.52	5.83086	5.60797	5.7757	6.73327	6.60084	6.01987	6.73812	7.04699	6.97952	NM_010807	chr4:129192947-129193006	Marcksl1	Mus musculus MARCKS-like 1 (Marcksl1), mRNA [NM_010807]	GO:0016192|GO:0005516|GO:0008284	NM_010807	Mm.424974	17357	ENSMUST00000062356	TC1719240
A_51_P483366	0.0142222	1.55502	up	101.672	67.978	0.463075	-0.17386	88.5297	80.8951	87.4113	119.628	96.6026	136.967	69.4752	69.9094	64.5494	0.195047	0.11745	0.310666	0.888157	0.823823	0.443308	-0.103387	-0.148607	-0.269585	AK033817	chr16:96668191-96668250		Mus musculus adult male epididymis cDNA, RIKEN full-length enriched library, clone:9230114N12 product:hypothetical Isoleucine-rich region containing protein, full insert sequence. [AK033817]						TC1613611
A_51_P471126	0.013023	3.9819	down	2259.72	7215.81	4.5617	6.55515	737.617	3986.15	2052.97	981.041	855.548	4944.99	7732.81	6876.24	7038.37	3.25368	5.74025	4.86442	3.92391	3.97054	5.61738	6.69496	6.47138	6.49911	NM_001011707	chr19:39261183-39261242	Cyp2c66	Mus musculus cytochrome P450, family 2, subfamily c, polypeptide 66 (Cyp2c66), mRNA [NM_001011707]	GO:0046872|GO:0008150|GO:0003674|GO:0016491|GO:0004497|GO:0005575|GO:0055114	NM_001011707	Mm.271190	69888	ENSMUST00000087236	TC1589466
A_51_P404875	0.00181517	2.53903	up	1236.61	507.714	4.05486	2.71058	1717.18	1451.44	1294.9	853.017	1062.65	1040.47	589.596	528.248	405.298	4.47278	4.28274	4.19954	3.72217	4.28328	3.36864	2.98177	2.76905	2.38092	NM_201639	chr7:74877693-74877634	Synm	Mus musculus synemin, intermediate filament protein (Synm), transcript variant 1, mRNA [NM_201639]	GO:0030674|GO:0005515|GO:0005882|GO:0008150|GO:0030054|GO:0030018|GO:0005624|GO:0019215|GO:0005856|GO:0005737|GO:0005198|GO:0060053	NM_201639	Mm.60526	233335	ENSMUST00000056808	TC1597146
A_52_P706060	0.0886582	2.94226	down	103.067	276.214	0.149733	1.70666	46.2192	32.1472	39.6048	179.109	144.198	177.124	127.292	355.319	346.032	-0.742623	-1.21391	-0.831476	1.47043	1.40174	0.814238	0.770184	2.19695	2.15285	NM_001029890	chr3:88345168-88345227	Mex3a	Mus musculus mex3 homolog A (C. elegans) (Mex3a), mRNA [NM_001029890]	GO:0008150|GO:0003674|GO:0005575	NM_001029890	Mm.275154	72640	ENSMUST00000098953	TC1710084
A_52_P373637	0.00552629	1.52593	up	98.7047	67.7502	0.421743	-0.187946	99.7718	101.33	75.7484	86.2766	92.3393	136.762	79.3369	60.9376	62.9761	0.367517	0.442386	0.104062	0.41664	0.758706	0.441149	0.0881062	-0.34676	-0.305182	NM_172271	chr3:107271049-107270990	Slc6a17	Mus musculus solute carrier family 6 (neurotransmitter transporter), member 17 (Slc6a17), mRNA [NM_172271]	GO:0015293|GO:0005887|GO:0016020|GO:0008150|GO:0003674|GO:0006836|GO:0016021|GO:0005575|GO:0006810|GO:0005328	NM_172271	Mm.212867	229706	ENSMUST00000029499	TC1603167
A_52_P568217	0.0164182	1.69617	up	898.695	552.211	3.60647	2.84418	822.497	771.776	642.062	992.557	1016.54	1146.74	594.903	571.797	489.931	3.41082	3.37151	3.18749	3.94075	4.21928	3.50895	2.9947	2.88334	2.65452	BC062927	chr1:183833886-183833827	Enah	Mus musculus enabled homolog (Drosophila), mRNA (cDNA clone MGC:73459 IMAGE:6851217), complete cds. [BC062927]	GO:0007399|GO:0008154|GO:0030154|GO:0030036|GO:0006928|GO:0015629|GO:0005829|GO:0005522|GO:0005856|GO:0045202|GO:0046907|GO:0005925|GO:0007015|GO:0005515|GO:0030175|GO:0007275|GO:0017124|GO:0001843|GO:0001725|GO:0030027|GO:0030054|GO:0042995|GO:0005737|GO:0007411|GO:0003779		Mm.389224	13800		TC1577221
A_52_P532769	0.000105504	3.97848	down	311.199	1273.43	2.05921	4.05142	416.755	368.378	366.556	253.621	213.152	248.729	1229.78	1197.63	1392.89	2.43001	2.30451	2.37881	1.97227	1.96557	1.30406	4.04237	3.94995	4.16195	XM_001481209	chr12:115921040-115920981		PREDICTED: Mus musculus similar to Ig H-chain V-JH1-region (LOC100048770), mRNA [XM_001481209]		XM_001481209	Mm.430747		ENSMUST00000103504	NP590647
A_51_P402378	0.0145468	1.96113	up	1280.81	676.782	4.09938	3.1277	948.838	1653.49	814.483	1379.34	1355.63	1533.05	818.327	610.764	601.257	3.61697	4.47077	3.53066	4.41551	4.63459	3.92782	3.45472	2.97845	2.94992	NM_025404	chr11:101528917-101528976	Arl4d	Mus musculus ADP-ribosylation factor-like 4D (Arl4d), mRNA [NM_025404]	GO:0005634|GO:0008150|GO:0003674|GO:0007264|GO:0005525|GO:0000166|GO:0005622	NM_025404	Mm.266840	80981	ENSMUST00000039388	TC1583199
A_52_P626780	0.000295413	1.67338	up	211.536	133.118	1.53929	0.796524	212.175	203.597	206.813	224.493	177.326	244.814	131.799	135.549	132.006	1.45607	1.44904	1.5531	1.79627	1.70009	1.28117	0.820382	0.806652	0.762538	BC004695	chr2:168719181-168719122		zinc finger protein 64 Gene [Source:MGI Symbol;Acc:MGI:107342] [ENSMUST00000029064]			Mm.2095		ENSMUST00000029064	TC1681153
A_52_P617512	0.00281057	1.5621	down	101.74	164.281	0.455097	1.09858	97.7498	86.0749	80.7482	100.767	90.6532	154.446	155.715	174.124	163.004	0.337979	0.206991	0.196278	0.640625	0.732119	0.616588	1.06095	1.16795	1.06684	NM_001081557	chr4:150434133-150434074	Camta1	Mus musculus calmodulin binding transcription activator 1 (Camta1), transcript variant 1, mRNA [NM_001081557]	GO:0030528|GO:0005634|GO:0008150|GO:0006350|GO:0003674|GO:0005516|GO:0005737|GO:0005575|GO:0045449	NM_001081557	Mm.318846	100072	ENSMUST00000105668	TC1644339
A_51_P179504	0.00677733	2.29784	down	169.363	396.558	1.12927	2.32955	230.51	207.174	211.042	109.399	81.1045	176.946	271.728	441.266	476.681	1.57564	1.47417	1.58231	0.759195	0.571542	0.812788	1.8642	2.50948	2.61496	NM_001123394	chr14:044540232-044540291	Ang3	Mus musculus angiogenin, ribonuclease A family, member 3 (Ang3), mRNA [NM_001123394]	GO:0004519|GO:0003676|GO:0016787|GO:0017148|GO:0007275|GO:0030154|GO:0004518|GO:0001525|GO:0004522	NM_001123394	Mm.24663	11730	ENSMUST00000096869	NP1398528
A_51_P510916	0.0926545	1.57568	down	714.255	1156.58	3.23628	3.89225	512.344	548.391	472.357	863.981	846.638	1041.82	876.367	1307.26	1286.1	2.72793	2.87853	2.74465	3.7406	3.95543	3.37051	3.55358	4.07631	4.04687	AK013921	chr2:175873132-175873191		KRAB box and zinc finger, C2H2 type domain containing [Source:RefSeq peptide;Acc:NP_001092778] [ENSMUST00000109011]			Mm.441314		ENSMUST00000109011	TC1574753
A_52_P612382	0.0273861	1.51868	down	544.153	863.806	2.88985	3.49267	490.516	427.678	473.055	655.793	555.323	662.552	804.974	872.502	913.942	2.66511	2.51985	2.74678	3.34284	3.34702	2.71752	3.43098	3.49299	3.55404	NM_023117	chr2:131023911-131023970	Cdc25b	Mus musculus cell division cycle 25 homolog B (S. pombe) (Cdc25b), transcript variant 1, mRNA [NM_023117]	GO:0001556|GO:0007067|GO:0000087|GO:0051301|GO:0007049|GO:0016787|GO:0004721|GO:0007144|GO:0045860|GO:0005737|GO:0005856|GO:0004725|GO:0006470|GO:0005622	NM_023117	Mm.38444	12531	ENSMUST00000028804	TC1590426
A_52_P384392	0.0226449	1.5438	up	399.357	271.161	2.43604	1.80955	498.133	466.017	448.294	311.489	303.269	368.943	294.612	298.297	220.575	2.68735	2.64371	2.66922	2.26878	2.47428	1.87288	1.98086	1.94458	1.50321	NM_023910	chr5:138187434-138187493	Tsc22d4	Mus musculus TSC22 domain family, member 4 (Tsc22d4), mRNA [NM_023910]	GO:0005634|GO:0006970|GO:0003700|GO:0006350|GO:0003674|GO:0006355|GO:0005575|GO:0045449	NM_023910	Mm.286399	78829	ENSMUST00000100540	TC1658096
A_52_P994399	0.000345051	9.7209	down	745.761	6973.77	3.20532	6.48641	496.243	355.372	418.703	1183.71	952.973	1067.57	5397.82	7379.15	8144.34	2.68186	2.25265	2.5707	4.19484	4.12612	3.40574	6.17635	6.57322	6.70967	NM_010039	chr8:022675993-022676052	Defa4	Mus musculus defensin, alpha, 4 (Defa4), mRNA [NM_010039]	GO:0006952|GO:0005576|GO:0005615|GO:0042742|GO:0005543	NM_010039	Mm.465152	13238	ENSMUST00000078121	TC1703289
A_51_P246677	1.3799e-05	1.63646	down	380.643	643.888	2.35819	3.06877	372.675	358.09	349.972	331.826	292.529	578.766	618.41	621.182	692.072	2.26873	2.26365	2.31202	2.36003	2.42227	2.52246	3.05061	3.00285	3.15286	NM_020002	chr14:56244160-56244219	Rec8	Mus musculus REC8 homolog (yeast) (Rec8), mRNA [NM_020002]	GO:0005515|GO:0007059|GO:0001556|GO:0007286|GO:0007141|GO:0000795|GO:0000794|GO:0000800|GO:0030893|GO:0007129|GO:0001673|GO:0000780|GO:0005634|GO:0007126|GO:0000228	NM_020002	Mm.23149	56739	ENSMUST00000002395	TC1585287
A_52_P1067	0.024584	1.69775	up	329.392	196.994	2.12516	1.36154	443.835	355.985	446.324	251.079	205.419	273.711	189.317	200.675	200.991	2.52084	2.25514	2.66287	1.95774	1.91226	1.44214	1.34285	1.3727	1.36907	AK089821	chr17:25407509-25407450	Ube2i	Mus musculus activated spleen cDNA, RIKEN full-length enriched library, clone:F830028O17 product:unclassifiable, full insert sequence. [AK089821]	GO:0007067|GO:0005524|GO:0010469|GO:0016604|GO:0030425|GO:0043687|GO:0051301|GO:0000166|GO:0001650|GO:0043398|GO:0005634|GO:0033145|GO:0004842|GO:0043161|GO:0045202|GO:0016925|GO:0019787|GO:0044419|GO:0016874|GO:0019789|GO:0005515|GO:0007059|GO:0007275|GO:0007049|GO:0051091|GO:0006464|GO:0008022|GO:0051246|GO:0043425|GO:0005737|GO:0000122		Mm.440926	22196		TC1599272
A_52_P391505	0.000142147	2.17349	up	781.561	376.494	3.41338	2.29337	946.616	918.965	749.284	676.011	601.696	796.795	410.187	349.439	369.856	3.61359	3.62334	3.41029	3.38665	3.46272	2.98369	2.45832	2.17288	2.24891	NR_027652	chr12:110787974-110796459	Meg3	Mus musculus maternally expressed 3 (Meg3), transcript variant 3, non-coding RNA [NR_027652]		NR_027652	Mm.289645	17263	ENSMUST00000021696	TC1657679
A_52_P237357	0.0311847	1.52928	up	911.91	621.312	3.63127	3.01842	833.086	819.494	660.989	1102.33	954.796	1100.76	597.614	617.155	649.165	3.42928	3.45806	3.2294	4.09209	4.12888	3.44991	3.00126	2.99347	3.06053	BC010335	chr1:71650749-71650690		Mus musculus fibronectin 1, mRNA (cDNA clone IMAGE:3156499), **** WARNING: chimeric clone ****. [BC010335]			Mm.466043			TC1608690
A_51_P250590	0.00437904	1.78436	up	256.784	150.762	1.8048	0.969389	277.392	349.398	231.856	227.977	210.455	243.627	170.737	135.264	146.286	1.84274	2.2282	1.71801	1.81849	1.9472	1.27416	1.19382	0.803617	0.910732	AK080963	chr7:117521026-117520967	Sbf2	Mus musculus 4 days neonate male adipose cDNA, RIKEN full-length enriched library, clone:B430219L04 product:hypothetical Gram-positive cocci surface protein 'anchoring' hexapeptide/dDENN domain/uDENN domain/Serine phosphorylation site in HPr protein/DENN (AEX-3) domain containing protein, full insert sequence. [AK080963]	GO:0051262|GO:0019902|GO:0019208|GO:0035091|GO:0005774|GO:0042803		Mm.102970	319934		TC1585534
A_52_P128283	0.0165016	1.60852	down	962.92	1625.99	3.71437	4.40011	818.122	827.12	827.964	1186.85	958.416	1159.04	1408.57	1692.03	1777.35	3.40313	3.47142	3.55434	4.19867	4.13434	3.52435	4.2382	4.44852	4.5136	NM_001033135	chr1:39609226-39609167	Rnf149	Mus musculus ring finger protein 149 (Rnf149), mRNA [NM_001033135]	GO:0005515|GO:0046872|GO:0016020|GO:0008150|GO:0003674|GO:0008270|GO:0016021|GO:0005575|GO:0016874	NM_001033135	Mm.28614	67702	ENSMUST00000114805	TC1575196
A_52_P190745	0.0023649	1.78768	down	135.789	255.384	0.889551	1.72764	134.053	110.738	116.53	154.969	127.146	171.297	217.784	263.733	284.635	0.793615	0.570473	0.725479	1.26158	1.22017	0.765985	1.54494	1.76691	1.87105	NM_026053	chr17:80623990-80624999	Gemin6	Mus musculus gem (nuclear organelle) associated protein 6 (Gemin6), mRNA [NM_026053]	GO:0000245|GO:0005634|GO:0005515|GO:0005681|GO:0008380|GO:0005737|GO:0006397	NM_026053	Mm.279985	67242	ENSMUST00000069486	TC1581661
A_51_P469568	0.00594781	1.64241	down	36.543	59.3418	-1.08929	-0.37347	40.0044	30.1488	33.1516	28.0038	20.6595	67.2899	57.6599	65.8206	54.5451	-0.950955	-1.3065	-1.08807	-1.20671	-1.40143	-0.582057	-0.372318	-0.235554	-0.512538	NM_020504	chr5:135390769-135390710	Cldn13	Mus musculus claudin 13 (Cldn13), mRNA [NM_020504]	GO:0005923|GO:0016020|GO:0030054|GO:0005886|GO:0005198|GO:0016021	NM_020504	Mm.86652	57255	ENSMUST00000008987	TC1583763
A_52_P562661	0.0526787	1.94187	down	307.338	524.837	1.81833	2.77577	169.997	430.596	193.541	187.554	145.984	716.353	523.678	529.636	521.195	1.13632	2.52966	1.45742	1.53691	1.4195	2.83015	2.81072	2.77284	2.74376	NM_010762	chr2:127459532-127459473	Mal	Mus musculus myelin and lymphocyte protein, T-cell differentiation protein (Mal), transcript variant 1, mRNA [NM_010762]	GO:0000300|GO:0016020|GO:0005886|GO:0045121|GO:0019911|GO:0042552|GO:0006917|GO:0016021|GO:0005794	NM_010762	Mm.39040	17153	ENSMUST00000028854	TC1572123
A_51_P332075	0.0516317	1.50935	up	1763.91	1213.7	4.56578	3.97186	2286.59	2297.26	1854.11	1281.15	1338.06	1526.29	1453.7	1106.9	1080.52	4.88594	4.94517	4.71743	4.30897	4.61576	3.92144	4.2837	3.83629	3.79559	NM_146054	chr14:46149104-46124351	Fermt2	Mus musculus fermitin family homolog 2 (Drosophila) (Fermt2), mRNA [NM_146054]	GO:0005515|GO:0007155|GO:0030054|GO:0031941|GO:0005856|GO:0005737|GO:0008360|GO:0001725	NM_146054	Mm.210018	218952	ENSMUST00000150660	TC1668521
A_51_P330677	0.000489127	1.82485	down	142.543	274.077	0.968141	1.83592	160.046	144.903	146.011	147.429	111.736	145.134	270.251	255.991	295.99	1.0493	0.958418	1.05085	1.18962	1.03379	0.526869	1.85634	1.72393	1.92749	NM_177766	chr8:75006341-75006282	Slc35e1	Mus musculus solute carrier family 35, member E1 (Slc35e1), mRNA [NM_177766]	GO:0016020|GO:0008150|GO:0003674|GO:0016021|GO:0005575|GO:0006810	NM_177766	Mm.291461	270066	ENSMUST00000043238
A_51_P124345	0.0216508	1.96858	down	707.893	1386.58	3.19939	4.17655	522.625	475.34	449.973	886.376	758.176	1154.87	1325.16	1440.28	1394.29	2.75659	2.67229	2.67461	3.77752	3.79622	3.51914	4.15014	4.21611	4.1634	NM_153166	chr17:29294933-29294874	Cpne5	Mus musculus copine V (Cpne5), mRNA [NM_153166]	GO:0043005|GO:0008150|GO:0003674|GO:0043025	NM_153166	Mm.39905	240058	ENSMUST00000024805	TC1584582
A_51_P503896	0.0014189	1.64374	down	345.234	594.411	2.23773	2.95472	429.784	345.652	345.613	339.539	259.868	350.95	577.53	585.671	620.032	2.47442	2.21265	2.29393	2.39317	2.25147	1.80075	2.95194	2.91793	2.99428	BC006727	chr11:120501238-120501179	Pycr1	pyrroline-5-carboxylate reductase 1 Gene [Source:MGI Symbol;Acc:MGI:2384795] [ENSMUST00000026133]	GO:0008652|GO:0008150|GO:0003674|GO:0008152|GO:0006950|GO:0006561|GO:0005739|GO:0005488|GO:0016491|GO:0004735|GO:0003824|GO:0055114		Mm.127731	209027	ENSMUST00000026133	TC1581089
A_51_P315682	0.0138497	1.70355	down	706.444	1295.03	3.25283	4.02137	632.052	563.166	644.284	694.893	637.035	1067.24	821.168	1526.91	1537.02	3.03086	2.91689	3.19247	3.42639	3.54506	3.40529	3.45972	4.30038	4.304	NM_183029	chr16:22059319-22059260	Igf2bp2	Mus musculus insulin-like growth factor 2 mRNA binding protein 2 (Igf2bp2), mRNA [NM_183029]	GO:0003676|GO:0006417|GO:0005737|GO:0003723|GO:0000166	NM_183029	Mm.479207	319765	ENSMUST00000041504	TC1597206
A_51_P279712	0.000618987	1.60924	down	1535.26	2581.37	4.38756	5.07394	1795.59	1715.5	1586.79	1367.33	1111.33	1634.99	2583.02	2610.52	2550.57	4.5372	4.52388	4.49282	4.40289	4.3479	4.02069	5.11303	5.0741	5.03469	NM_145923	chr5:64300986-64300927	Rell1	Mus musculus RELT-like 1 (Rell1), mRNA [NM_145923]	GO:0016020|GO:0008150|GO:0003674|GO:0016021|GO:0005575	NM_145923	Mm.479580	100532	ENSMUST00000087327	TC1576060
A_51_P102081	0.000148478	9.37135	down	4535.36	41293.9	5.84349	9.07175	3227.38	2471.68	2662.55	6930.44	5362.45	6557.68	38811.3	40977.4	44092.9	5.38311	5.05075	5.23951	6.74447	6.61851	6.0246	9.02237	9.04652	9.14634	NM_007847		Defa-rs2	Mus musculus defensin, alpha, related sequence 2 (Defa-rs2), mRNA [NM_007847]	GO:0006952|GO:0005576|GO:0005615	NM_007847	Mm.422993	13222		TC1585573
A_51_P429308	0.00192382	2.22606	down	94.4192	211.585	0.309189	1.46368	70.5662	78.8086	66.0635	105.084	83.0599	162.933	198.132	218.027	218.596	-0.132138	0.079751	-0.0932984	0.701141	0.605913	0.693763	1.4085	1.49234	1.49021	NM_001081324	chr8:88161567-88161508	Neto2	Mus musculus neuropilin (NRP) and tolloid (TLL)-like 2 (Neto2), mRNA [NM_001081324]	GO:0004872|GO:0016020|GO:0005886|GO:0016021	NM_001081324	Mm.126079	74513	ENSMUST00000109686	TC1597832
A_51_P345073	4.70939e-05	2.29584	down	114.005	267.781	0.605262	1.80428	100.791	95.3031	100.82	110.606	89.2198	187.289	274.419	256.034	272.89	0.38218	0.353921	0.516563	0.775033	0.709125	0.894752	1.87842	1.72417	1.81026	NM_175249	chr5:36548681-36548740	Psapl1	Mus musculus prosaposin-like 1 (Psapl1), mRNA [NM_175249]	GO:0005764|GO:0006629|GO:0006665|GO:0005576|GO:0008150|GO:0003674|GO:0005575	NM_175249	Mm.44242	76943	ENSMUST00000052224	TC1580718
A_52_P334191	0.0136832	1.65614	down	2560.37	4340.51	5.09489	5.82272	3396.18	2937.93	3106.99	1921.19	1630.63	2369.27	4516.82	4125.78	4378.92	5.45665	5.30005	5.46222	4.89353	4.90105	4.55586	5.91928	5.73443	5.81444	NM_018754	chr4:133157259-133157200	Sfn	Mus musculus stratifin (Sfn), mRNA [NM_018754]	GO:0005634|GO:0005576|GO:0005515|GO:0043616|GO:0051726|GO:0043588|GO:0030307|GO:0005737|GO:0000079|GO:0030216|GO:0019904|GO:0008285	NM_018754	Mm.44482	55948	ENSMUST00000057311	TC1608089
A_52_P474528	0.00651569	1.95501	up	624.052	328.523	3.06428	2.0971	502.232	567.676	418.26	780.696	623.928	851.518	303.569	353.935	328.066	2.69917	2.92839	2.56918	3.59436	3.51507	3.07952	2.02407	2.19132	2.07593		chrX:9048145-9057941
A_51_P307168	0.00313416	1.77466	down	603.646	1110.79	3.02902	3.85657	734.714	688.422	716.04	445.381	453.887	583.431	1111.03	1063.18	1158.15	3.248	3.20662	3.34482	2.78464	3.05602	2.53405	3.89587	3.77815	3.89569	NM_026993	chr3:145556803-145556862	Ddah1	Mus musculus dimethylarginine dimethylaminohydrolase 1 (Ddah1), mRNA [NM_026993]	GO:0006809|GO:0006525|GO:0005739|GO:0045429|GO:0016813|GO:0016787|GO:0016597|GO:0046872|GO:0017014|GO:0045766|GO:0005737|GO:0008270|GO:0016403	NM_026993	Mm.234247	69219	ENSMUST00000029845	TC1655776
A_51_P396325	0.00011659	1.77044	up	108.64	64.8196	0.577349	-0.246761	117.483	115.382	106.165	103.678	88.6756	120.457	57.3947	70.1366	66.9275	0.603262	0.629739	0.591087	0.681714	0.700297	0.257995	-0.378968	-0.143926	-0.21739	NM_013681	chr6:115224988-115225047	Syn2	Mus musculus synapsin II (Syn2), transcript variant IIb, mRNA [NM_013681]	GO:0030672|GO:0030054|GO:0005524|GO:0045202|GO:0007269|GO:0046983|GO:0008021|GO:0003824	NM_013681	Mm.441431	20965		TC1586975
A_52_P265556	0.00242312	2.06069	down	122.765	260.64	0.718465	1.76159	166.613	140.479	138.666	105.439	77.964	107.427	237.499	257.175	287.245	1.10731	0.913676	0.976394	0.706003	0.514568	0.0928349	1.66996	1.73059	1.88422	U41439	chr6:68718764-68718705		Mus musculus monoclonal antibody FB2 to cardiolipin, Ig light chain variable region mRNA, partial cds. [U41439]			Mm.422999		ENSMUST00000103333	NP054092
A_52_P629895	0.00956478	1.56206	up	82637.1	55064.1	10.132	9.48854	100930	84943.4	96824.1	78993.1	56993.5	77138.3	53675.7	56701.4	54815.2	10.35	10.1537	10.424	10.2552	10.0283	9.58079	9.49017	9.51508	9.46037	NM_007409	chr3:137952821-137952880	Adh1	Mus musculus alcohol dehydrogenase 1 (class I) (Adh1), mRNA [NM_007409]	GO:0006069|GO:0005488|GO:0003824|GO:0042572|GO:0046872|GO:0005829|GO:0008152|GO:0004745|GO:0048149|GO:0008270|GO:0051287|GO:0048545|GO:0042573|GO:0005622|GO:0046186|GO:0001523|GO:0005739|GO:0016491|GO:0042803|GO:0033574|GO:0006068|GO:0004022|GO:0035276|GO:0005737|GO:0032526|GO:0008144|GO:0005625|GO:0055114	NM_007409	Mm.2409	11522	ENSMUST00000004232	TC1573340
A_52_P631307	0.00157786	1.88735	up	55.0964	30.5506	-0.426982	-1.34334	67.912	62.7449	60.5687	44.2512	36.6153	58.4861	36.3682	25.0804	30.2031	-0.187448	-0.249105	-0.218581	-0.546614	-0.575792	-0.784352	-1.03721	-1.62753	-1.36529	AK043577	chr2:84578341-84578400	Ypel4	yippee-like 4 (Drosophila) Gene [Source:MGI Symbol;Acc:MGI:3605071] [ENSMUST00000090729]	GO:0005634|GO:0008150|GO:0003674|GO:0005575		Mm.59978	241525	ENSMUST00000090729
A_51_P183746	0.0651864	1.98039	down	102.957	196.815	0.371196	1.35698	62.6571	54.5149	67.5823	161.005	118.658	153.325	180.775	194.049	215.622	-0.303638	-0.45195	-0.0605078	1.3167	1.1205	0.606071	1.27624	1.32426	1.47045	BC137872	chr2:30736593-30736653	Prrx2	Mus musculus paired related homeobox 2, mRNA (cDNA clone MGC:169496 IMAGE:8860891), complete cds. [BC137872]	GO:0042472|GO:0051216|GO:0003700|GO:0048701|GO:0007275|GO:0042474|GO:0006355|GO:0045449|GO:0030528|GO:0005634|GO:0048704|GO:0043565|GO:0003677|GO:0030326|GO:0045880|GO:0002053|GO:0048844		Mm.1802	20204
A_51_P114843	0.00437323	1.86938	down	43.4256	79.2617	-0.857293	0.0452679	41.8474	34.5287	31.9113	33.0058	30.1074	89.1531	85.4727	72.3467	79.9656	-0.885977	-1.11081	-1.14309	-0.969612	-0.85812	-0.17616	0.195578	-0.0991659	0.039392	NM_198622	chr6:87931096-87931037	H1fx	Mus musculus H1 histone family, member X (H1fx), mRNA [NM_198622]	GO:0005634|GO:0008150|GO:0003674|GO:0003677|GO:0005694|GO:0005575	NM_198622	Mm.33796	243529	ENSMUST00000056403	TC1581734
A_51_P103179	0.0248858	1.58723	up	39.5591	25.0022	-0.949506	-1.61602	52.6705	41.1067	51.8602	25.3154	22.1127	44.2893	25.196	24.6178	25.193	-0.55412	-0.859227	-0.442526	-1.35231	-1.30336	-1.18549	-1.56669	-1.65439	-1.62697	AK034126	chr2:65187639-65187580	Slc38a11	Mus musculus adult male diencephalon cDNA, RIKEN full-length enriched library, clone:9330158F14 product:hypothetical Permeases for amino acids and related compounds, family II containing protein, full insert sequence. [AK034126]	GO:0016020|GO:0008150|GO:0003674|GO:0006814|GO:0006811|GO:0006865|GO:0016021|GO:0005575|GO:0006810		Mm.227703	320106		TC1592049
A_51_P258493	2.08498e-05	3.15691	up	151.423	49.6846	1.03317	-0.62534	181.242	175.193	174.862	124.649	101.395	151.197	48.6849	50.2653	50.1034	1.22873	1.23227	1.31099	0.94747	0.89367	0.585907	-0.616412	-0.624528	-0.635079	NM_011067	chr4:150379315-150379256	Per3	Mus musculus period homolog 3 (Drosophila) (Per3), mRNA [NM_011067]	GO:0005634|GO:0005515|GO:0006350|GO:0010553|GO:0048511|GO:0005737|GO:0007623|GO:0004871|GO:0007165|GO:0006355|GO:0045449	NM_011067	Mm.121361	18628	ENSMUST00000103204	TC1585666
A_51_P412024	0.0967038	1.75731	up	302.495	170.637	1.95473	1.14136	170.956	200.816	207.11	455.397	358.129	422.565	144.622	201.597	165.692	1.14443	1.4292	1.55517	2.81672	2.71417	2.06866	0.954329	1.37931	1.09044	AK043297	chr9:123545921-123545862	Slc6a20a	solute carrier family 6 (neurotransmitter transporter), member 20A Gene [Source:MGI Symbol;Acc:MGI:2143217] [ENSMUST00000040960]	GO:0015293|GO:0005887|GO:0016020|GO:0005886|GO:0016324|GO:0006836|GO:0015171|GO:0006865|GO:0016021|GO:0006810|GO:0005328		Mm.440867	102680	ENSMUST00000040960	TC1579829
A_52_P315733	0.000584435	2.64053	down	58.804	152.634	-0.410833	0.989992	45.0059	48.1497	42.1323	52.8037	45.5057	119.226	141.171	148.34	168.39	-0.781	-0.631074	-0.742227	-0.291692	-0.262192	0.243186	0.919481	0.936746	1.11375	NM_009285	chr14:69658903-69658962	Stc1	Mus musculus stanniocalcin 1 (Stc1), mRNA [NM_009285]	GO:0005179|GO:0005576|GO:0030320|GO:0001503|GO:0005615|GO:0006874	NM_009285	Mm.20911	20855		TC1767215
A_52_P439263	0.000697596	5.01087	down	49.6494	227.149	-0.760813	1.56425	43.7329	96.9668	41.437	24.9179	19.546	71.296	214.053	218.242	249.152	-0.822395	0.378889	-0.766233	-1.37515	-1.48136	-0.498625	1.52001	1.49376	1.67897	NM_011674	chr3:125569054-125568995	Ugt8a	Mus musculus UDP galactosyltransferase 8A (Ugt8a), mRNA [NM_011674]	GO:0016757|GO:0016020|GO:0008152|GO:0008489|GO:0042552|GO:0016740|GO:0008120|GO:0003851|GO:0016758|GO:0009247|GO:0016021	NM_011674	Mm.306021	22239	ENSMUST00000057944	TC1583771
A_51_P509609	0.00517881	1.56904	up	2770.57	1852.61	5.24471	4.59483	2680.31	2509.12	2291.7	3080.54	2644.49	3417.27	1923.94	1837.7	1796.18	5.11514	5.07244	5.02312	5.57471	5.5986	5.08425	4.68804	4.56766	4.5288	NM_053082	chr7:148679215-148679274	Tspan4	Mus musculus tetraspanin 4 (Tspan4), mRNA [NM_053082]	GO:0005515|GO:0016020|GO:0016021	NM_053082	Mm.245355	64540	ENSMUST00000117634	TC1574904
A_52_P401059	5.75594e-08	1.7345	up	110.785	66.385	0.586312	-0.208204	118.032	106.439	102.437	99.1604	83.6197	155.025	63.3591	69.6264	66.1696	0.60999	0.513354	0.539512	0.617434	0.615604	0.621979	-0.236334	-0.154458	-0.23382		chr17:85175422-85175363		Q8R4C3_CRIGR (Q8R4C3) Csr1, partial (37%) [TC1661977]						TC1661977
A_51_P483269	0.00190962	1.58928	down	35.5821	59.3944	-1.04268	-0.374307	35.3641	30.488	32.7567	33.1246	33.3955	48.3636	66.3653	52.447	59.3709	-1.12883	-1.29036	-1.10536	-0.964426	-0.708584	-1.05852	-0.169457	-0.563231	-0.390233	NM_175563	chr11:86905287-86905228	Prr11	Mus musculus proline rich 11 (Prr11), mRNA [NM_175563]	GO:0008150|GO:0003674|GO:0005575	NM_175563	Mm.132381	270906	ENSMUST00000051395	TC1581779
A_51_P327016	0.0015518	1.51899	up	166.997	115.232	1.19132	0.588212	167.536	161.39	137.396	173.003	149.507	213.151	116.283	112.137	117.277	1.11528	1.11388	0.96312	1.42039	1.4539	1.08136	0.63968	0.533093	0.591864	NM_016744	chr2:79705240-79679145	Pde1a	Mus musculus phosphodiesterase 1A, calmodulin-dependent (Pde1a), transcript variant 2, mRNA [NM_016744]	GO:0046069|GO:0004117|GO:0005516|GO:0043025|GO:0004114|GO:0003824|GO:0007165|GO:0004115|GO:0030553|GO:0005634|GO:0016787|GO:0046872|GO:0005737|GO:0034391|GO:0048660|GO:0048101|GO:0006198	NM_016744	Mm.40678	18573	ENSMUST00000102653	TC1582978
A_52_P395242	8.84916e-05	1.73616	up	77.9265	46.5348	0.0750431	-0.720857	71.8242	68.7609	74.2581	78.3882	60.0735	114.254	46.2566	44.3786	48.9692	-0.106646	-0.117014	0.0753956	0.278306	0.138489	0.181728	-0.690227	-0.804229	-0.668114	AK086722	chr11:110386219-110386278		mitogen-activated protein kinase kinase 6 Gene [Source:MGI Symbol;Acc:MGI:1346870] [ENSMUST00000100260]			Mm.363360		ENSMUST00000100260	TC1595493
A_52_P345247	0.00331677	1.53016	down	579.246	934.833	2.99351	3.60719	623.467	517.563	563.813	619.047	509.866	641.721	903.86	994.872	905.769	3.01113	2.79506	2.99999	3.25965	3.22381	2.67143	3.59814	3.68235	3.54108	NM_146074	chr17:3519449-3519390	Tfb1m	Mus musculus transcription factor B1, mitochondrial (Tfb1m), nuclear gene encoding mitochondrial protein, mRNA [NM_146074]	GO:0016433|GO:0000154|GO:0006350|GO:0003677|GO:0016740|GO:0008649|GO:0008168|GO:0005739|GO:0000179|GO:0006364|GO:0045449	NM_146074	Mm.226554	224481	ENSMUST00000041003	TC1651183
A_51_P451338	0.0389528	1.51556	down	117.469	184.006	0.657472	1.25732	98.0961	93.8948	87.5075	142.102	116.404	166.812	160.454	192.112	199.45	0.343081	0.332444	0.312254	1.13652	1.09283	0.727706	1.1042	1.30978	1.35797	NM_010588	chr12:114146946-114146887	Jag2	Mus musculus jagged 2 (Jag2), mRNA [NM_010588]	GO:0005515|GO:0007275|GO:0042492|GO:0007605|GO:0008083|GO:0042981|GO:0007154|GO:0007283|GO:0030155|GO:0016331|GO:0005509|GO:0042127|GO:0001501|GO:0001709|GO:0005887|GO:0042475|GO:0016020|GO:0005624|GO:0048471|GO:0045061|GO:0009912|GO:0007219|GO:0016021	NM_010588	Mm.186146	16450	ENSMUST00000075827	TC1579775
A_51_P256170	9.62415e-07	3.08039	down	131.837	422.588	0.839679	2.46279	114.77	131.356	130.047	111.047	116.128	187.674	414.46	416.641	436.663	0.569562	0.816812	0.883812	0.780775	1.0894	0.897709	2.47327	2.42664	2.48846	NM_134066	chr13:4135881-4134506	Akr1c18	Mus musculus aldo-keto reductase family 1, member C18 (Akr1c18), mRNA [NM_134066]	GO:0007567|GO:0006709|GO:0042448|GO:0005829|GO:0050810|GO:0047006|GO:0005737|GO:0016491|GO:0005625|GO:0055114	NM_134066	Mm.41337	105349	ENSMUST00000021635	TC1581538
A_51_P259975	0.00403973	1.50072	down	274.296	432.604	1.90979	2.49545	265.068	241.175	255.049	306.277	242.41	335.796	405.472	440.096	452.244	1.77717	1.6934	1.85555	2.24444	2.15114	1.73707	2.44165	2.50565	2.53904	NM_023113	chr11:73119110-73119051	Aspa	Mus musculus aspartoacylase (Aspa), mRNA [NM_023113]	GO:0019807|GO:0005634|GO:0016787|GO:0006083|GO:0046872|GO:0008152|GO:0004046|GO:0048714|GO:0005737|GO:0016788	NM_023113	Mm.293574	11484	ENSMUST00000021119	TC1581704
A_52_P314370	0.000751528	1.94353	down	750.628	1551.24	3.33965	4.29832	747.563	669.452	708.831	640.496	603.313	1134.11	1064.59	1815.67	1773.46	3.27301	3.16631	3.33022	3.30879	3.46659	3.49297	3.83427	4.55027	4.51043	NM_001162368	chr10:101853759-101853818	Mgat4c	Mus musculus mannosyl (alpha-1,3-)-glycoprotein beta-1,4-N-acetylglucosaminyltransferase, isozyme C (putative) (Mgat4c), transcript variant 1, mRNA [NM_001162368]	GO:0016757|GO:0046872|GO:0016020|GO:0008150|GO:0003674|GO:0016740|GO:0005975|GO:0008454|GO:0016758|GO:0016021|GO:0005575|GO:0005794	NM_001162368	Mm.25252	67569	ENSMUST00000020039	TC1597477
A_51_P463552	0.00695877	1.53052	down	113.031	179.785	0.615362	1.22938	113.957	85.9076	98.2061	114.053	107.083	158.979	178.554	187.822	172.981	0.559299	0.204183	0.478659	0.819306	0.972411	0.658317	1.2584	1.2772	1.15255	NM_146254	chr4:102710775-102710716	Wdr78	Mus musculus WD repeat domain 78 (Wdr78), mRNA [NM_146254]	GO:0008150|GO:0003674|GO:0005575	NM_146254	Mm.374877	242584	ENSMUST00000136355	NP582809
A_51_P164296	0.0072132	1.90264	down	9501.06	18880.8	7.01237	7.94037	8824.34	7552.6	7440.98	11738.6	10331.6	11118.2	16975.9	19175.3	20491.1	6.83423	6.66223	6.7222	7.50472	7.56461	6.78626	7.82939	7.95094	8.04079	NM_021475	chr14:69181532-69181473	Adamdec1	Mus musculus ADAM-like, decysin 1 (Adamdec1), mRNA [NM_021475]	GO:0006508|GO:0005576|GO:0016787|GO:0046872|GO:0008150|GO:0003674|GO:0004222|GO:0008270|GO:0008233|GO:0008237|GO:0005575	NM_021475	Mm.36742	58860		TC1582348
A_52_P301079	0.00471357	1.53693	down	77.7353	125.663	0.0900249	0.710076	73.826	68.8659	68.5176	85.2469	72.7527	97.2025	117.055	122.28	137.653	-0.0669861	-0.114811	-0.0406785	0.399318	0.41476	-0.0514526	0.649232	0.658022	0.822975	NM_027629	chr7:107418883-107418942	Pgm2l1	Mus musculus phosphoglucomutase 2-like 1 (Pgm2l1), mRNA [NM_027629]	GO:0006006|GO:0008150|GO:0003674|GO:0016868|GO:0016740|GO:0005975|GO:0016853|GO:0047933|GO:0005575	NM_027629	Mm.440524	70974	ENSMUST00000054436	NP731429
A_52_P406411	0.000723514	1.99874	down	45.8425	94.4235	-0.711059	0.28803	41.6266	35.1115	40.2907	46.7159	36.4304	74.8801	81.0966	90.263	111.911	-0.893608	-1.08666	-0.806707	-0.468416	-0.583098	-0.427864	0.119756	0.220042	0.524291	NM_177753	chr14:118633947-118633888	Sox21	Mus musculus SRY-box containing gene 21 (Sox21), mRNA [NM_177753]	GO:0005634|GO:0003700|GO:0006350|GO:0003677|GO:0006355|GO:0045449	NM_177753	Mm.478420	223227	ENSMUST00000082178	TC1582205
A_51_P383644	0.0367764	1.62381	down	237.358	404.887	1.65087	2.35025	190.892	210.647	170.682	238.683	209.249	403.992	562.803	340.297	311.561	1.30357	1.49816	1.27608	1.88469	1.93891	2.00381	2.91467	2.13463	2.00146	NM_007446	chr3:113259069-113259010	Amy1	Mus musculus amylase 1, salivary (Amy1), transcript variant 1, mRNA [NM_007446]	GO:0004556|GO:0005576|GO:0016787|GO:0046872|GO:0016798|GO:0008152|GO:0043169|GO:0005615|GO:0005975|GO:0016160|GO:0003824	NM_007446	Mm.439727	11722	ENSMUST00000106540	TC1704442
A_52_P26416	9.15751e-05	1.7109	down	266.944	478.045	1.86588	2.64064	295.445	260.98	289.322	258.674	192.695	304.545	462.741	491.708	479.685	1.9337	1.80727	2.03745	2.00074	1.82001	1.59614	2.63225	2.66564	2.62403	AF106279	chr1:154973997-154973938	Lamc2	Mus musculus laminin gamma2 chain mRNA, partial cds. [AF106279]	GO:0005515|GO:0005576|GO:0005604|GO:0005610|GO:0005615|GO:0005938|GO:0005578|GO:0007155|GO:0005624|GO:0048471|GO:0031012|GO:0005607|GO:0008201|GO:0005625		Mm.329272	16782		NP162559
A_52_P348720	0.000608762	1.56281	down	104.586	172.613	0.522278	1.16642	113.996	108.037	102.923	102.521	84.2024	115.833	159.512	165.217	193.11	0.559797	0.534853	0.546346	0.665518	0.625621	0.20153	1.09571	1.0922	1.31136	NM_028493	chr13:76007358-76007299	Rhobtb3	Mus musculus Rho-related BTB domain containing 3 (Rhobtb3), mRNA [NM_028493]	GO:0005515|GO:0016787|GO:0008150|GO:0003674|GO:0005524|GO:0005525|GO:0000166|GO:0005575|GO:0006810|GO:0005794	NM_028493	Mm.276200	73296	ENSMUST00000022078	TC1600397
A_51_P317191	0.000177872	1.6381	down	85.8458	147.293	0.230086	0.942108	87.9909	73.1384	87.6868	83.6946	72.0169	110.547	144.246	144.744	152.888	0.186239	-0.0279722	0.315207	0.372806	0.400095	0.134143	0.950574	0.901336	0.974414	NM_026189	chr9:25411155-25411214	Eepd1	Mus musculus endonuclease/exonuclease/phosphatase family domain containing 1 (Eepd1), mRNA [NM_026189]	GO:0008150|GO:0003674|GO:0003677|GO:0005575|GO:0006281	NM_026189	Mm.112977	67484	ENSMUST00000040677	TC1577888
A_51_P243750	0.0132652	1.60148	down	297.052	498.057	2.01951	2.69891	264.142	241.181	266.737	356.951	296.077	357.223	477.799	488.396	527.975	1.77212	1.69344	1.92019	2.46532	2.43966	1.82631	2.67845	2.65589	2.76241	NM_012025	chr15:99451576-99451517	Racgap1	Mus musculus Rac GTPase-activating protein 1 (Racgap1), mRNA [NM_012025]	GO:0007275|GO:0030154|GO:0051301|GO:0007049|GO:0007165|GO:0007283|GO:0006810|GO:0031410|GO:0005634|GO:0046872|GO:0006811|GO:0005737|GO:0005856|GO:0005096|GO:0007405|GO:0009790|GO:0005622	NM_012025	Mm.273804	26934		TC1573455
A_52_P87843	0.0193901	4.11196	down	1375.62	4881	3.94506	5.98489	624.818	511.54	588.803	2336.25	2003.22	2189.07	4171.02	5306.76	5165.23	3.01425	2.77817	3.06256	5.17572	5.19794	4.44173	5.80437	6.0976	6.0527	NM_053080	chr7:73535844-73535785	Aldh1a3	Mus musculus aldehyde dehydrogenase family 1, subfamily A3 (Aldh1a3), mRNA [NM_053080]	GO:0060324|GO:0060166|GO:0021768|GO:0031076|GO:0004028|GO:0048048|GO:0070324|GO:0016491|GO:0070403|GO:0004030|GO:0002138|GO:0043065|GO:0004029|GO:0008152|GO:0048386|GO:0005737|GO:0042573|GO:0055114|GO:0002072	NM_053080	Mm.140988	56847	ENSMUST00000015278	TC1592608
A_52_P1187549	0.0630656	1.66311	up	192.422	115.575	1.321	0.587114	268.277	255.975	242.352	139.999	106.834	141.098	105.881	129.981	110.863	1.79454	1.77933	1.78188	1.11501	0.969056	0.486183	0.504486	0.746132	0.510723	AK009643	chr19:53978993-53979052	2310035P21Rik	Mus musculus adult male tongue cDNA, RIKEN full-length enriched library, clone:2310035P21 product:unclassifiable, full insert sequence. [AK009643]	GO:0008150|GO:0003674|GO:0005575			75683		TC1644282
A_52_P1029561	0.0997756	1.71134	up	65.2529	37.9096	-0.257121	-1.03224	46.2755	38.5599	40.5566	95.2987	75.0228	95.8041	30.1704	40.4471	43.1113	-0.740865	-0.951502	-0.797218	0.560126	0.45909	-0.0723581	-1.30675	-0.938056	-0.851923		chr19:054011935-054011994
A_52_P203316	0.000261857	2.31077	up	147.601	67.1921	1.00722	-0.20116	196.961	154.805	129.171	131.83	120.099	152.739	79.4001	60.0215	62.1548	1.34872	1.05378	0.874055	1.02827	1.13791	0.600552	0.0892549	-0.368613	-0.324121	NM_201531	chr12:17179586-17179527	Kcnf1	Mus musculus potassium voltage-gated channel, subfamily F, member 1 (Kcnf1), mRNA [NM_201531]	GO:0005244|GO:0005515|GO:0005249|GO:0008150|GO:0055085|GO:0005216|GO:0005267|GO:0006810|GO:0016020|GO:0006811|GO:0005575|GO:0016021|GO:0006813|GO:0008076	NM_201531	Mm.40173	382571
A_52_P686231	0.00594123	1.6081	up	178.407	116.396	1.2826	0.597242	176.465	148.344	156.472	215.941	155.382	217.835	103.003	127.969	118.216	1.19019	0.992274	1.15068	1.74024	1.50951	1.11272	0.464728	0.723636	0.603363	AK040960	chr3:121237632-121237691	A530020G20Rik	Mus musculus adult male aorta and vein cDNA, RIKEN full-length enriched library, clone:A530051K04 product:unclassifiable, full insert sequence. [AK040960]	GO:0008150|GO:0003674|GO:0005575		Mm.393669	319839		TC1588031
A_52_P425734	0.000383077	1.6531	up	1872.8	1188.36	4.67907	3.9539	1782.15	1727.25	1716.82	2010.65	1602.07	2397.83	1141.44	1245.4	1178.22	4.52636	4.53373	4.60644	4.95919	4.87556	4.57314	3.93483	4.00637	3.92048	NM_145146	chr5:90982490-90982549	Afm	Mus musculus afamin (Afm), mRNA [NM_145146]	GO:0005576|GO:0008150|GO:0003674|GO:0005615|GO:0005575|GO:0006810	NM_145146	Mm.348786	280662	ENSMUST00000113179	TC1579673
A_52_P231232	0.0930229	1.7723	down	86.3016	150.317	0.129292	0.954911	60.3894	46.8576	53.0263	121.547	98.8743	137.115	120.174	156.761	174.016	-0.356819	-0.67032	-0.410446	0.911108	0.857356	0.44487	0.687172	1.0164	1.16116	NM_178421	chr19:60835533-60835592	Nanos1	Mus musculus nanos homolog 1 (Drosophila) (Nanos1), mRNA [NM_178421]	GO:0046872|GO:0008150|GO:0006417|GO:0003674|GO:0005737|GO:0008270|GO:0003723	NM_178421	Mm.186390	332397	ENSMUST00000088237	TC1626627
A_51_P156857	0.0150277	1.56074	down	518.042	845.235	2.81776	3.45998	481.455	430.436	412.243	587.06	531.536	665.519	769.467	860.583	905.654	2.63822	2.52912	2.54827	3.18311	3.28385	2.72396	3.3659	3.47315	3.5409	NM_134133	chr18:60634019-60633960	2010002N04Rik	Mus musculus RIKEN cDNA 2010002N04 gene (2010002N04Rik), mRNA [NM_134133]	GO:0016020|GO:0008150|GO:0003674|GO:0016021|GO:0005575	NM_134133	Mm.273197	106878	ENSMUST00000042710	TC1578914
A_51_P189358	0.0227199	4.41348	down	73.2173	268.039	-0.355471	1.78645	28.7014	30.3568	22.7536	122.668	101.759	133.065	208.074	293	303.044	-1.43	-1.29658	-1.63106	0.924359	0.898843	0.401611	1.47914	1.91874	1.96147	AK030294	chr3:154430497-154430556		BC007180 protein Fragment [Source:UniProtKB/TrEMBL;Acc:Q922J8] [ENSMUST00000098496]			Mm.478925		ENSMUST00000098496	TC1639534
A_52_P215638	2.74198e-07	4.60863	down	39.4405	191.251	-0.901069	1.30327	35.6832	39.9532	40.318	38.1416	29.0118	53.5352	153.761	220.214	199.776	-1.11587	-0.90029	-0.805729	-0.760965	-0.911601	-0.91196	1.04273	1.50674	1.36033	NM_177010		F630003A18Rik	Mus musculus RIKEN cDNA F630003A18 gene (F630003A18Rik), mRNA [NM_177010]	GO:0004872|GO:0016020|GO:0008150|GO:0003674|GO:0016021|GO:0005575	NM_177010	Mm.479694	319823		TC1583349
A_51_P137707	0.000116623	4.07175	up	354.692	98.5512	2.27761	0.251966	376.138	359.57	387.746	296.742	285.411	422.546	60.0116	152.713	82.9285	2.28207	2.2696	2.45989	2.19881	2.38673	2.06859	-0.314645	0.978662	0.0918798	AV065344			AV065344 AV065344 Mus musculus small intestine C57BL/6J adult Mus musculus cDNA clone 2010015I06, mRNA sequence [AV065344]
A_52_P53507	0.00185215	3.28282	down	63.7779	211.496	-0.265728	1.44921	95.0557	79.2207	78.7488	44.4221	42.3572	42.8628	170.913	221.108	242.467	0.297658	0.0872755	0.160106	-0.541053	-0.365632	-1.23272	1.1953	1.51259	1.63973	XM_903476	chr12:115414781-115414722		PREDICTED: Mus musculus similar to H2b-3 coding region (LOC630348), mRNA [XM_903476]		XM_903476	Mm.425779		ENSMUST00000103475	NP614384
A_52_P299053	0.0284686	1.51586	down	72.9396	115.641	-0.0198969	0.580243	65.1661	54.7719	66.1731	91.5149	64.1891	95.8226	94.2009	125.871	126.853	-0.246993	-0.445165	-0.0909081	0.501676	0.234088	-0.0720801	0.335855	0.699776	0.705098	NM_023587	chr16:35108915-35108974	Ptplb	Mus musculus protein tyrosine phosphatase-like (proline instead of catalytic arginine), member b (Ptplb), mRNA [NM_023587]	GO:0016020|GO:0008150|GO:0003674|GO:0016021|GO:0005575|GO:0005783	NM_023587	Mm.27286	70757		TC1603410
[truncated: 915 more rows]
