# Supplementary material for: Calcium Prevents Tumorigenesis in a Mouse Model of Colorectal Cancer
Source: PLoS One. 2011 Aug 17;6(8):e22566. doi: 10.1371/journal.pone.0022566 (PMC3157344; doi:10.1371/journal.pone.0022566)
Supplement: Table S4 — Complete list of the GO terms based on the genes whose changes due to DMH treatment could be reversed by dietary calcium. (XLS) [file pone.0022566.s004.xls]

## Sheet: Sheet1
Table S4.The complete list of the GO terms based on the genes whose changes due to the DMH treatment could be reversed by diatery calcium.
#Column "GO.ID" stands for the ID of gene ontology term
#Column "Term" stands for the name of gene ontology term
#Column "Ontology" stands for the ontology of GOID belongs to
#Column "Count" stands for the number of DE genes associated with the listed GOID
#Column "Pop.Hits" stands for the number of background population genes associated with the listed GOID
#Column "List.Total" stands for the total number of DE genes
#Column "Pop.Total" stands for the total number of background population genes
#Column "Fold.Enrichment" stands for the Fold Enrichment value of the GOID, it equals (Count/Pop.Hits)/(List.Total/Pop.Total)
#Column "Pvalue" stands for the significance testing value of the GOID
#Column "FDR" stands for the false discovery rate of the GOID, using Benjamini & Hochberg (1995) method
#Column "GENES" stands for the DE genes associated with the GOID
GO.ID	Term	Ontology	Count	Pop.Hits	List.Total	Pop.Total	Fold.Enrichment	Pvalue	FDR	GENES
GO:0009987	cellular process	Biological process	207	11097	296	29901	1.88434	1.2e-30	2.85e-27	WDR12//GAR1//SLC27A4//ACSBG1//ARNTL//DBF4//ESPL1//TOP2A//REC8//SGOL1//KIF2C//SFN//NDC80//BMI1//ID3//RHOX5//TGIF1//TNF//NR2C1//FCER1A//DUSP4//SOCS3//CDCA3//USP22//USP18//PMEPA1//UBE2C//GEMIN6//NCAPH//CCND1//CCNF//ECT2//ANLN//PTGS2//SULF2//CYR61//IGFBP4//HTRA1//ESM1//CITED1//FOXM1//SOX17//T//PSRC1//JAG2//PROX1//SEMA3F//NR4A2//MYC//FCGR3//AGPAT6//ALDH1A3//RDH10//LBP//PLCG2//CCT3//CCT6A//H1F0//EVL//C…
GO:0032502	developmental process	Biological process	82	2761	296	29901	3.00014	4e-20	3.8e-17	ECT2//BMI1//GJA5//JAG2//BMP7//SPP1//ANG2//ELK3//EREG//HBEGF//SOX17//TNFRSF12A//RTN4//REC8//CITED1//FOXM1//T//RDH10//CD44//MYC//ADAM10//SOX21//CCNB1//LRP5//ODZ4//PROX1//VANGL2//SEMA3F//NR4A2//TGIF1//CCNF//TNFRSF19//KRT17//CYR61//AGPAT6//ALDH1A3//PLCG2//ID3//STMN1//ROBO1//FANCD2//TNF//WNT5A//CENPE//PLXNB1//WIF1//RACGAP1//NKD1//PCSK6//GDPD5//BOC//EVL//CCND1//CDC42EP1//TESC//MSR1//THBS1//HSPA5//TCF7/…
GO:0008152	metabolic process	Biological process	143	7156	296	29901	2.01864	4.8e-20	3.8e-17	SLC27A4//ACSBG1//DBF4//SFN//BMI1//ID3//RHOX5//TGIF1//TNF//NR2C1//FCER1A//DUSP4//SOCS3//CDCA3//USP22//USP18//PMEPA1//UBE2C//GEMIN6//PTGS2//SULF2//ALDH1A3//RDH10//CCT3//CCT6A//EREG//PGM2L1//NPL//PCDH12//GDPD5//BPGM//ACADS//ALOX12//CP//FASN//GPX2//PYCR1//SMOX//NOX1//FAAH//LDHD//STEAP1//GFOD2//DUS4L//LBP//AKR1C21//SFN//NME4//TOP2A//FANCD2//MYC//CAMTA1//EAF2//ARNTL//ELK3//ETV6//FOXM1//LPIN1//MXD3//MEF…
GO:0044238	primary metabolic process	Biological process	127	6294	296	29901	2.03831	1.5e-17	8.90625e-15	SLC27A4//ACSBG1//DBF4//BMI1//ID3//RHOX5//TGIF1//TNF//NR2C1//FCER1A//SOCS3//CDCA3//USP22//USP18//PMEPA1//UBE2C//GEMIN6//PTGS2//ALDH1A3//RDH10//CCT3//CCT6A//PGM2L1//NPL//PCDH12//GDPD5//BPGM//SFN//NME4//TOP2A//FANCD2//MYC//CAMTA1//EAF2//ARNTL//ELK3//ETV6//FOXM1//LPIN1//MXD3//MEF2B//BHLHA15//NFIL3//NPAS2//NR4A2//PROX1//ZFP184//SOX21//SOX17//T//TCF7//TEAD2//CDCA7L//SOX21//SP6//ETV5//REM2//ELK3//WDR77/…
GO:0016043	cellular component organization	Biological process	62	1867	296	29901	3.3546	2.4e-17	1.14e-14	NDC80//ESPL1//GEMIN6//ECT2//PSRC1//MYC//H1F0//EVL//CTTNBP2//BFSP2//AVIL//LRP5//MSR1//SH3KBP1//HCK//FCGR3//NOLC1//STMN1//BHLHA15//BUB1B//CCNF//CDK1//CDCA3//KIF11//KIFC1//NCAPH//CENPE//CCNB1//SPAG5//NCAPD2//UBE2C//ANLN//SGOL1//KIF2C//TEX15//FANCD2//REC8//BOC//BMP7//ROBO1//LBP//CDC42EP1//CADPS//BMI1//USP22//NR4A2//JUB//CYR61//TNFRSF11B//TNF//NOX1//GFOD2//PROX1//TOP2A//RTN4//PLEK//LPIN1//S100A9//VANG…
GO:0048522	positive regulation of cellular process	Biological process	48	1158	296	29901	4.18723	3.9e-17	1.54375e-14	FCGR3//MYC//EREG//TNF//ALOX12//FOXM1//IL11//MARCKSL1//PROX1//T//CDCA7L//WDR77//SP6//EAF2//IL1B//PLEK//MSR1//CYR61//SPP1//THBS1//KRT17//SFN//BMI1//PSRC1//HSPA5//CD44//BMP7//ALDH1A3//FCER1A//SOCS3//SH3PXD2B//BOC//TGIF1//CD276//TNFRSF12A//CENPE//SOX21//SOX17//ETV5//ARNTL//BHLHA15//NPAS2//NR4A2//TEAD2//TOP2A//YAP1//DUSP22//HBEGF//PLXNB1//STMN1
GO:0048518	positive regulation of biological process	Biological process	51	1318	296	29901	3.90885	5.9e-17	2.00179e-14	FCGR3//FCER1A//EREG//MYC//TNF//ALOX12//FOXM1//IL11//MARCKSL1//PROX1//T//CDCA7L//WDR77//SP6//EAF2//IL1B//PLEK//MSR1//CYR61//SPP1//THBS1//KRT17//SFN//CD276//BMI1//PSRC1//HSPA5//PLCG2//LBP//CD44//BMP7//ALDH1A3//SOCS3//SH3PXD2B//BOC//TGIF1//CCL24//TNFRSF12A//CENPE//SOX21//SOX17//ETV5//ARNTL//BHLHA15//NPAS2//NR4A2//TEAD2//TOP2A//YAP1//DUSP22//HBEGF//PLXNB1//H2-EA//LAT2//STMN1
GO:0007275	multicellular organismal development	Biological process	72	2537	296	29901	2.86686	1.7e-16	5.04688e-14	BMI1//GJA5//JAG2//BMP7//SPP1//ANG2//ELK3//EREG//HBEGF//SOX17//TNFRSF12A//RTN4//CITED1//FOXM1//T//RDH10//CD44//MYC//ADAM10//SOX21//CCNB1//LRP5//ODZ4//VANGL2//SEMA3F//NR4A2//TGIF1//CCNF//TNFRSF19//PROX1//KRT17//CYR61//AGPAT6//ALDH1A3//PLCG2//WNT5A//RACGAP1//PCSK6//TNF//STMN1//ROBO1//GDPD5//BOC//EVL//ID3//CCND1//TESC//THBS1//HSPA5//TCF7//PTGS2//SFN//TRIM10//DYRK3//MMP13//CD276//TEX15//TOP2A//TNFRSF1…
GO:0050793	regulation of developmental process	Biological process	33	560	296	29901	5.95278	2.6e-16	6.65e-14	CDC42EP1//MSR1//BOC//ANG2//THBS1//CD276//RTN4//CCND1//BMI1//PLA2G2A//HSPA5//TNFRSF11B//SOCS3//BMP7//LPIN1//SH3PXD2B//KRT36//TGIF1//CITED1//TNF//IL1B//CCL24//TNFRSF12A//SEMA3F//MT3//PLXNB1//KRT17//PROX1//WNT5A//ETV5//EAF2//WDR77//MYC//CENPE
GO:0048856	anatomical structure development	Biological process	66	2198	296	29901	3.03326	2.8e-16	6.65e-14	ECT2//BMI1//GJA5//JAG2//BMP7//SPP1//ANG2//ELK3//EREG//HBEGF//SOX17//TNFRSF12A//RTN4//CITED1//FOXM1//T//RDH10//CD44//MYC//LRP5//ODZ4//VANGL2//SEMA3F//NR4A2//TGIF1//CCNF//TNFRSF19//PROX1//KRT17//CYR61//AGPAT6//ALDH1A3//PLCG2//TNF//WNT5A//STMN1//ROBO1//GDPD5//RACGAP1//BOC//EVL//SOX21//ID3//CCND1//CDC42EP1//TESC//THBS1//HSPA5//TCF7//PTGS2//SFN//TRIM10//DYRK3//MMP13//CD276//TEX15//TNFRSF11B//SLC27A4//…
GO:0048731	system development	Biological process	62	2048	296	29901	3.05813	1.9e-15	4.10227e-13	BMI1//GJA5//JAG2//BMP7//SPP1//ANG2//ELK3//EREG//HBEGF//SOX17//TNFRSF12A//RTN4//CITED1//FOXM1//T//RDH10//CD44//MYC//VANGL2//SEMA3F//NR4A2//TGIF1//CCNF//TNFRSF19//PROX1//KRT17//CYR61//AGPAT6//ALDH1A3//PLCG2//TNF//WNT5A//STMN1//ROBO1//GDPD5//RACGAP1//BOC//EVL//SOX21//ID3//CCND1//TESC//THBS1//HSPA5//TCF7//PTGS2//SFN//TRIM10//DYRK3//MMP13//CD276//TEX15//TNFRSF11B//SLC27A4//ASPRV1//KRT36//IL1B//CCL24//…
GO:0044237	cellular metabolic process	Biological process	119	6046	296	29901	1.98826	2.3e-15	4.55208e-13	SLC27A4//ACSBG1//DBF4//SFN//BMI1//ID3//RHOX5//TGIF1//TNF//NR2C1//FCER1A//DUSP4//SOCS3//CDCA3//USP22//USP18//PMEPA1//UBE2C//GEMIN6//PTGS2//SULF2//ALDH1A3//RDH10//CCT3//CCT6A//EREG//PCDH12//PGM2L1//GDPD5//BPGM//NOX1//FAAH//STEAP1//SFN//NME4//TOP2A//FANCD2//MYC//CAMTA1//EAF2//ARNTL//ELK3//ETV6//FOXM1//LPIN1//MXD3//MEF2B//BHLHA15//NFIL3//NPAS2//NR4A2//PROX1//ZFP184//SOX21//SOX17//T//TCF7//TEAD2//CDCA…
GO:0048513	organ development	Biological process	55	1695	296	29901	3.27783	5.7e-15	1.04135e-12	ANG2//ELK3//EREG//HBEGF//SOX17//TNFRSF12A//RTN4//GJA5//CITED1//FOXM1//T//BMP7//RDH10//CD44//MYC//VANGL2//SEMA3F//TGIF1//CCNF//TNFRSF19//PROX1//KRT17//CYR61//AGPAT6//ALDH1A3//PLCG2//TNF//WNT5A//BMI1//ID3//CCND1//TESC//JAG2//BOC//THBS1//HSPA5//ROBO1//PTGS2//SFN//TRIM10//DYRK3//MMP13//CD276//TCF7//TEX15//SPP1//TNFRSF11B//SLC27A4//ASPRV1//KRT36//IL1B//CCL24//SOX21//WDR77//AREG//SOCS3//PCDH12//ETV5//E…
GO:0009653	anatomical structure morphogenesis	Biological process	44	1173	296	29901	3.78921	3.2e-14	5.42857e-12	ECT2//ANG2//ELK3//EREG//HBEGF//SOX17//TNFRSF12A//RTN4//CITED1//FOXM1//T//CD44//MYC//LRP5//ODZ4//BMP7//VANGL2//TGIF1//KRT17//CYR61//ALDH1A3//TNF//WNT5A//RDH10//STMN1//BOC//EVL//ROBO1//CDC42EP1//JAG2//THBS1//HSPA5//NR4A2//PROX1//GJA5//TCF7//TNFRSF11B//IL1B//CCL24//SOX21//BMI1//SEMA3F//PLXNB1//AREG//SOCS3//ETV5
GO:0000279	M phase	Biological process	23	305	296	29901	7.61767	6.3e-14	9.975e-12	NDC80//ESPL1//STMN1//BUB1B//CCNF//CDK1//CDCA3//KIF11//KIFC1//NCAPH//CENPE//CCNB1//SPAG5//NCAPD2//UBE2C//ANLN//SGOL1//KIF2C//MKI67//REC8//TEX15//FANCD2//EREG
GO:0022403	cell cycle phase	Biological process	24	345	296	29901	7.02726	1e-13	1.48438e-11	NDC80//ESPL1//STMN1//BUB1B//CCNF//CDK1//CDCA3//KIF11//KIFC1//NCAPH//CENPE//CCNB1//SPAG5//NCAPD2//UBE2C//ANLN//SGOL1//KIF2C//DBF4//MKI67//REC8//TEX15//FANCD2//EREG
GO:0051301	cell division	Biological process	23	316	296	29901	7.3525	1.3e-13	1.81618e-11	ANLN//TOP2A//BMI1//EREG//IL1B//BUB1B//CCND1//CCNF//CDK1//CDCA3//KIF11//KIFC1//NCAPH//CENPE//CCNB1//RACGAP1//CKS1B//SPAG5//NDC80//NCAPD2//UBE2C//SGOL1//KIF2C
GO:0007049	cell cycle	Biological process	32	673	296	29901	4.80318	2.8e-13	3.69444e-11	SFN//NDC80//ESPL1//NCAPH//CCND1//CCNF//STMN1//BUB1B//CDK1//CDCA3//KIF11//KIFC1//CENPE//CCNB1//SPAG5//NCAPD2//UBE2C//ANLN//SGOL1//KIF2C//DBF4//MKI67//REC8//TEX15//FANCD2//PROX1//EREG//JUB//USP22//RACGAP1//CKS1B//PSRC1
GO:0060429	epithelium development	Biological process	22	296	296	29901	7.50801	3e-13	3.75e-11	CD44//CITED1//MYC//VANGL2//T//TGIF1//KRT17//AGPAT6//ALDH1A3//JAG2//PTGS2//SFN//BMP7//ID3//CCND1//PROX1//KRT36//SOX17//RDH10//WDR77//AREG//WNT5A//ETV5//ROBO1
GO:0022402	cell cycle process	Biological process	25	401	296	29901	6.29781	3.7e-13	4.39375e-11	NDC80//ESPL1//CCND1//CCNF//STMN1//BUB1B//CDK1//CDCA3//KIF11//KIFC1//NCAPH//CENPE//CCNB1//SPAG5//NCAPD2//UBE2C//ANLN//SGOL1//KIF2C//DBF4//MKI67//REC8//TEX15//FANCD2//EREG
GO:0042127	regulation of cell proliferation	Biological process	27	479	296	29901	5.69406	4.4e-13	4.97619e-11	ALOX12//FOXM1//IL11//MARCKSL1//MYC//PROX1//T//CDCA7L//TNF//WDR77//SP6//BMP7//EREG//PLA2G2A//ROBO1//TGIF1//SFN//BMI1//CD276//HBEGF//WNT5A//EAF2//DUSP22//JAG2//MMP7//PLAU//PTGS2//TCF7
GO:0051239	regulation of multicellular organismal process	Biological process	33	731	296	29901	4.56027	4.9e-13	5.28977e-11	EREG//HBEGF//PLEK//IL1B//BOC//ANG2//THBS1//CD276//RTN4//CCND1//TNF//LBP//BMI1//AGPAT6//HSPA5//TNFRSF11B//FCGR3//NR4A2//FCER1A//KRT36//TGIF1//CITED1//CCL24//TNFRSF12A//SEMA3F//BMP7//MT3//PLXNB1//KRT17//PROX1//WNT5A//ETV5//EAF2//WDR77//MYC
GO:0008283	cell proliferation	Biological process	31	652	296	29901	4.80295	6.8e-13	7.02174e-11	RACGAP1//ALOX12//FOXM1//IL11//MARCKSL1//MYC//PROX1//T//CDCA7L//TNF//WDR77//SP6//BMP7//EREG//PLA2G2A//ROBO1//TGIF1//SFN//BMI1//CCND1//DUSP22//JAG2//MMP7//PLAU//PTGS2//TCF7//CD276//HBEGF//WNT5A//AREG//EAF2//MKI67
GO:0006996	organelle organization	Biological process	39	1054	296	29901	3.73782	1.6e-12	1.58333e-10	NDC80//ESPL1//PSRC1//MYC//H1F0//EVL//CTTNBP2//BFSP2//AVIL//NOLC1//STMN1//BHLHA15//BUB1B//CCNF//CDK1//CDCA3//KIF11//KIFC1//NCAPH//CENPE//CCNB1//SPAG5//NCAPD2//UBE2C//ANLN//SGOL1//KIF2C//TEX15//FANCD2//REC8//CADPS//BMI1//USP22//PROX1//TOP2A//PLEK//LPIN1//S100A9//KRT17//EREG
GO:0048519	negative regulation of biological process	Biological process	42	1213	296	29901	3.4977	1.8e-12	1.71e-10	BMI1//ID3//RHOX5//TGIF1//TNF//NR2C1//GPX2//EVL//ALOX12//SPP1//CENPE//BMP7//EREG//PLA2G2A//PROX1//ROBO1//SFN//WDR77//MYC//SOCS3//IL1B//MXD3//ANG2//THBS1//RTN4//CCND1//SOX17//WIF1//EAF2//PSRC1//HSPA5//HTRA1//WNT5A//STMN1//CD276//TNFRSF11B//CD44//PLCG2//IL1RL1//NR4A2//CITED1//IL11//SEMA3F//MT3//AVIL
GO:0048869	cellular developmental process	Biological process	50	1689	296	29901	2.99043	3.6e-12	3.28846e-10	ECT2//REC8//CITED1//FOXM1//SOX17//T//JAG2//PROX1//SEMA3F//NR4A2//AGPAT6//PLCG2//RACGAP1//STMN1//BOC//BMP7//EVL//ROBO1//CDC42EP1//MSR1//RDH10//ANG2//EREG//ETV6//SOX21//WNT5A//SH3PXD2B//TNFRSF12A//NKD1//PTGS2//SFN//TRIM10//DYRK3//TNF//RTN4//ID3//CCND1//KRT17//BMI1//PLA2G2A//VANGL2//RHOX5//SOCS3//LPIN1//KRT36//TGIF1//CD276//BHLHA15//MT3//PLXNB1//WDR77
GO:0065007	biological regulation	Biological process	113	6258	296	29901	1.82405	7.2e-12	6.33333e-10	SFN//BMI1//ID3//RHOX5//TGIF1//TNF//NR2C1//FCER1A//DUSP4//CYR61//IGFBP4//HTRA1//ESM1//GPX2//IL1B//FCGR3//EREG//SOCS3//ALDH1A3//RDH10//MYC//NOX1//CCND1//EVL//ANG2//ARNTL//REM2//IL1RL1//NPAS2//ID3//TNFRSF11B//ELK3//WNT5A//PLCG2//PLXNB1//ODZ4//RACGAP1//FRMPD1//NIACR1//ETV5//ELK3//ETV6//FOXM1//MEF2B//BHLHA15//NFIL3//NR4A2//ZFP184//T//TCF7//TEAD2//SOX21//WDR77//KDELR1//MT3//TESC//ALOX12//SPP1//HSPA5//C…
GO:0009888	tissue development	Biological process	30	685	296	29901	4.4241	1.3e-11	1.10268e-09	CD44//CITED1//MYC//BMP7//VANGL2//SEMA3F//T//TGIF1//TNFRSF19//KRT17//AGPAT6//ALDH1A3//ANG2//RDH10//BOC//JAG2//PTGS2//SFN//MMP13//CD276//ID3//CCND1//SPP1//SLC27A4//ASPRV1//PROX1//KRT36//WNT5A//SOX17//WDR77//AREG//ETV5//ROBO1
GO:0048523	negative regulation of cellular process	Biological process	38	1080	296	29901	3.5543	1.4e-11	1.14655e-09	BMI1//ID3//RHOX5//TGIF1//TNF//NR2C1//EVL//ALOX12//SPP1//CENPE//BMP7//EREG//PLA2G2A//PROX1//ROBO1//SFN//WDR77//MYC//SOCS3//MXD3//RTN4//CCND1//SOX17//WIF1//EAF2//PSRC1//HSPA5//HTRA1//WNT5A//STMN1//CD276//CD44//PLCG2//IL1RL1//NR4A2//CITED1//IL1B//IL11//SEMA3F//MT3//AVIL
GO:0040007	growth	Biological process	23	399	296	29901	5.82303	1.6e-11	1.26667e-09	CYR61//IGFBP4//HTRA1//ESM1//HBEGF//KRT17//SFN//EAF2//PSRC1//RTN4//SOCS3//PLA2G2A//AGPAT6//PTGS2//TNFRSF12A//SOX21//SEMA3F//PROX1//RDH10//AREG//WNT5A//ROBO1//BMP7
GO:0030154	cell differentiation	Biological process	47	1601	296	29901	2.96552	2.3e-11	1.7621e-09	REC8//CITED1//FOXM1//SOX17//T//JAG2//PROX1//SEMA3F//NR4A2//AGPAT6//PLCG2//RACGAP1//STMN1//BOC//BMP7//EVL//ROBO1//MSR1//RDH10//PTGS2//SFN//TRIM10//DYRK3//TNF//SOX21//RTN4//ID3//CCND1//KRT17//BMI1//PLA2G2A//RHOX5//SOCS3//LPIN1//SH3PXD2B//KRT36//TGIF1//CD276//TNFRSF12A//BHLHA15//MT3//PLXNB1//WDR77//ANG2//EREG//ETV6//WNT5A//NKD1
GO:0000280	nuclear division	Biological process	17	208	296	29901	8.25619	3.6e-11	2.59091e-09	NDC80//BUB1B//CCNF//CDK1//CDCA3//KIF11//KIFC1//NCAPH//CENPE//CCNB1//SPAG5//NCAPD2//UBE2C//ANLN//SGOL1//KIF2C//EREG
GO:0007067	mitosis	Biological process	17	208	296	29901	8.25619	3.6e-11	2.59091e-09	NDC80//CENPE//BUB1B//EREG//CCNF//CDK1//CDCA3//KIF11//KIFC1//NCAPH//CCNB1//SPAG5//NCAPD2//UBE2C//ANLN//SGOL1//KIF2C
GO:0000087	M phase of mitotic cell cycle	Biological process	17	210	296	29901	8.17756	4.2e-11	2.93382e-09	NDC80//BUB1B//CCNF//CDK1//CDCA3//KIF11//KIFC1//NCAPH//CENPE//CCNB1//SPAG5//NCAPD2//UBE2C//ANLN//SGOL1//KIF2C//EREG
GO:0000278	mitotic cell cycle	Biological process	19	275	296	29901	6.97935	4.6e-11	3.12143e-09	NDC80//STMN1//BUB1B//CCNF//CDK1//CDCA3//KIF11//KIFC1//NCAPH//CENPE//CCNB1//SPAG5//NCAPD2//UBE2C//ANLN//SGOL1//KIF2C//DBF4//EREG
GO:0048285	organelle fission	Biological process	17	212	296	29901	8.10041	4.8e-11	3.16667e-09	NDC80//BUB1B//CCNF//CDK1//CDCA3//KIF11//KIFC1//NCAPH//CENPE//CCNB1//SPAG5//NCAPD2//UBE2C//ANLN//SGOL1//KIF2C//EREG
GO:0050789	regulation of biological process	Biological process	106	5922	296	29901	1.80814	8.5e-11	5.45608e-09	SFN//BMI1//ID3//RHOX5//TGIF1//TNF//NR2C1//FCER1A//DUSP4//CYR61//IGFBP4//HTRA1//ESM1//FCGR3//EREG//SOCS3//GPX2//MYC//CCND1//EVL//ANG2//ARNTL//REM2//IL1RL1//NPAS2//ID3//TNFRSF11B//ELK3//WNT5A//PLCG2//PLXNB1//ODZ4//RACGAP1//FRMPD1//NIACR1//ETV5//ELK3//ETV6//FOXM1//MEF2B//BHLHA15//NFIL3//NR4A2//ZFP184//T//TCF7//TEAD2//SOX21//WDR77//ALOX12//SPP1//HSPA5//CENPE//DBF4//CDK1//ECT2//STMN1//PLEK//ARL4C//CDC…
GO:0006950	response to stress	Biological process	38	1153	296	29901	3.32926	9.4e-11	5.84615e-09	IL1B//NR4A2//PLAT//PLAU//FCGR3//FCER1A//LBP//CD44//GPX2//DEFA-RS2//H2-EA//TNF//DEFA20//PGLYRP1//FANCD2//CCL7//THBS1//PLA2G7//CCL24//PTGS2//HSPA5//CDK1//WNT5A//HCK//TEX15//PLEK//EVL//CCND1//CITED1//HBEGF//JUB//ELK3//IL1RL1//TMEM173//EREG//DUSP22//CD276//AVIL//HSPH1//PYCR1
GO:0001558	regulation of cell growth	Biological process	11	70	296	29901	15.8741	9.6e-11	5.84615e-09	KRT17//SFN//EAF2//PSRC1//RTN4//TNFRSF12A//SEMA3F//CYR61//IGFBP4//HTRA1//ESM1
GO:0002009	morphogenesis of an epithelium	Biological process	16	192	296	29901	8.41807	1e-10	5.9375e-09	CD44//CITED1//MYC//VANGL2//T//TGIF1//ALDH1A3//JAG2//PROX1//SOX17//RDH10//AREG//WNT5A//BMP7//ETV5//ROBO1//KRT17
GO:0032501	multicellular organismal process	Biological process	86	4435	296	29901	1.95884	2.5e-10	1.44817e-08	BMI1//GJA5//JAG2//BMP7//SPP1//ANG2//ELK3//EREG//HBEGF//SOX17//TNFRSF12A//RTN4//REC8//CITED1//FOXM1//T//RDH10//CD44//MYC//GPX2//IL1B//ADAM10//SOX21//CCNB1//LRP5//ODZ4//VANGL2//SEMA3F//NR4A2//TGIF1//CCNF//TNFRSF19//PROX1//KRT17//CYR61//AGPAT6//ALDH1A3//PLCG2//NOX1//FCGR3//ID3//STMN1//ROBO1//FANCD2//TNF//WNT5A//CENPE//PLXNB1//WIF1//RACGAP1//NKD1//TEX15//S100A11//PCSK6//GDPD5//BOC//EVL//CCND1//BFSP2/…
GO:0043170	macromolecule metabolic process	Biological process	96	5283	296	29901	1.83563	4.9e-10	2.77083e-08	DBF4//BMI1//ID3//RHOX5//TGIF1//TNF//NR2C1//FCER1A//SOCS3//CDCA3//USP22//USP18//PMEPA1//UBE2C//GEMIN6//CCT3//CCT6A//PCDH12//TOP2A//FANCD2//MYC//CAMTA1//EAF2//ARNTL//ELK3//ETV6//FOXM1//LPIN1//MXD3//MEF2B//BHLHA15//NFIL3//NPAS2//NR4A2//PROX1//ZFP184//SOX21//SOX17//T//TCF7//TEAD2//CDCA7L//SOX21//SP6//ETV5//REM2//ELK3//WDR77//WDR12//GAR1//TRA2A//MYC//RARS//ADAM10//BUB1B//CCND1//CDK1//HCK//WNT5A//DYRK3…
GO:0050794	regulation of cellular process	Biological process	100	5624	296	29901	1.79618	5.9e-10	3.25872e-08	SFN//BMI1//ID3//RHOX5//TGIF1//TNF//NR2C1//FCER1A//DUSP4//CYR61//IGFBP4//HTRA1//ESM1//FCGR3//SOCS3//MYC//CCND1//EVL//ANG2//ARNTL//REM2//IL1RL1//NPAS2//ID3//TNFRSF11B//ELK3//WNT5A//PLCG2//PLXNB1//ODZ4//RACGAP1//FRMPD1//NIACR1//EREG//ETV5//ELK3//ETV6//FOXM1//MEF2B//BHLHA15//NFIL3//NR4A2//ZFP184//T//TCF7//TEAD2//SOX21//WDR77//ALOX12//SPP1//HSPA5//CENPE//DBF4//CDK1//ECT2//STMN1//PLEK//ARL4C//CDC42EP1/…
GO:0032535	regulation of cellular component size	Biological process	14	158	296	29901	8.95086	6.8e-10	3.67045e-08	CYR61//IGFBP4//HTRA1//ESM1//EVL//KRT17//SFN//EAF2//PSRC1//RTN4//PLEK//TNFRSF12A//SEMA3F//AVIL
GO:0022603	regulation of anatomical structure morphogenesis	Biological process	15	190	296	29901	7.97502	8.4e-10	4.43333e-08	CDC42EP1//ANG2//THBS1//RTN4//TNFRSF11B//IL1B//CCL24//TNFRSF12A//SEMA3F//PLXNB1//PROX1//BMP7//WNT5A//TNF//ETV5
GO:0009790	embryonic development	Biological process	27	672	296	29901	4.05871	9.3e-10	4.80163e-08	ADAM10//BMI1//SOX21//CCNB1//RDH10//LRP5//ODZ4//BMP7//T//HBEGF//TGIF1//VANGL2//ALDH1A3//PCSK6//JAG2//TCF7//GJA5//WNT5A//SOX17//TOP2A//HSPA5//MYC//PROX1//SOCS3//CYR61//CITED1//PCDH12//RACGAP1
GO:0045595	regulation of cell differentiation	Biological process	20	368	296	29901	5.49005	9.9e-10	5.00266e-08	MSR1//RTN4//CCND1//BMI1//PLA2G2A//BMP7//SOCS3//LPIN1//SH3PXD2B//KRT36//BOC//TGIF1//CITED1//CD276//TNF//TNFRSF12A//SEMA3F//MT3//PLXNB1//PROX1
GO:0050896	response to stimulus	Biological process	54	2282	296	29901	2.39041	1.8e-09	8.90625e-08	IL1B//NR4A2//PLAT//PLAU//FCGR3//FCER1A//LBP//CD44//PLCG2//GPX2//DEFA-RS2//H2-EA//TNF//DEFA20//PGLYRP1//FANCD2//ABCC4//CYR61//ROBO1//S100A9//CCL7//CCL24//AVIL//HSPH1//PYCR1//THBS1//PLA2G7//SPON2//LAT2//TMEM173//BMI1//PTGS2//HSPA5//CDK1//WNT5A//HCK//MYC//TEX15//PLEK//EVL//CCND1//AREG//CITED1//IRG1//LPIN1//HBEGF//JUB//ELK3//NPAS2//IL1RL1//EREG//DUSP22//SOCS3//CD276//SEMA3F//ACSBG1//BOC//ID3//BFSP2
GO:0016049	cell growth	Biological process	11	94	296	29901	11.8211	2.5e-09	1.21173e-07	CYR61//IGFBP4//HTRA1//ESM1//KRT17//SFN//EAF2//PSRC1//RTN4//TNFRSF12A//SEMA3F
GO:0010604	positive regulation of macromolecule metabolic process	Biological process	24	575	296	29901	4.21636	4e-09	1.9e-07	FOXM1//IL1B//KRT17//HSPA5//CD44//IL11//FCGR3//PSRC1//FCER1A//EREG//SOX21//SOX17//ETV5//EAF2//TNF//ARNTL//BMP7//BHLHA15//MYC//NPAS2//NR4A2//T//TEAD2//TOP2A//YAP1
GO:0006629	lipid metabolic process	Biological process	26	671	296	29901	3.91422	4.1e-09	1.90931e-07	SLC27A4//ACSBG1//PTGS2//ALDH1A3//RDH10//AGPAT6//ACADS//LBP//FASN//FAAH//APOB48R//PLA2G2A//PLA2G12A//PSAPL1//SPP1//ALOX12//HMGCS2//AKR1C21//PLCG2//ASPG//PLA2G7//FCER1A//PITPNC1//IL1B//LPIN1//GDPD5
GO:0010557	positive regulation of macromolecule biosynthetic process	Biological process	22	488	296	29901	4.55404	4.5e-09	2.05529e-07	FOXM1//IL1B//KRT17//FCGR3//PSRC1//FCER1A//EREG//SOX21//SOX17//ETV5//EAF2//TNF//ARNTL//BMP7//IL11//BHLHA15//MYC//NPAS2//NR4A2//T//TEAD2//TOP2A//YAP1
GO:0031325	positive regulation of cellular metabolic process	Biological process	24	581	296	29901	4.17281	4.9e-09	2.19575e-07	FOXM1//IL1B//KRT17//HSPA5//CD44//IL11//EREG//FCGR3//PSRC1//FCER1A//SOX21//SOX17//ETV5//EAF2//TNF//ARNTL//BMP7//BHLHA15//MYC//NPAS2//NR4A2//T//TEAD2//TOP2A//YAP1
GO:0006928	cellular component movement	Biological process	20	416	296	29901	4.85658	8e-09	3.51852e-07	SEMA3F//NR4A2//LBP//TNFRSF12A//BOC//BMP7//EVL//ROBO1//PLAT//PLAU//RHOX5//JUB//RTN4//FCGR3//IL1B//S100A9//HBEGF//LRP5//TNF//STMN1//LYPD3
GO:0048729	tissue morphogenesis	Biological process	16	261	296	29901	6.19261	9e-09	3.81696e-07	CD44//CITED1//MYC//BMP7//VANGL2//T//TGIF1//KRT17//ALDH1A3//JAG2//PROX1//SOX17//RDH10//AREG//WNT5A//ETV5//ROBO1
GO:0031328	positive regulation of cellular biosynthetic process	Biological process	22	507	296	29901	4.38338	9e-09	3.81696e-07	FOXM1//IL1B//KRT17//FCGR3//PSRC1//FCER1A//EREG//SOX21//SOX17//ETV5//EAF2//TNF//ARNTL//BMP7//IL11//BHLHA15//MYC//NPAS2//NR4A2//T//TEAD2//TOP2A//YAP1
GO:0009891	positive regulation of biosynthetic process	Biological process	22	510	296	29901	4.35759	1e-08	4.16667e-07	FOXM1//IL1B//KRT17//FCGR3//PSRC1//FCER1A//EREG//SOX21//SOX17//ETV5//EAF2//TNF//ARNTL//BMP7//IL11//BHLHA15//MYC//NPAS2//NR4A2//T//TEAD2//TOP2A//YAP1
GO:0008361	regulation of cell size	Biological process	11	109	296	29901	10.1944	1.2e-08	4.91379e-07	CYR61//IGFBP4//HTRA1//ESM1//KRT17//SFN//EAF2//PSRC1//RTN4//TNFRSF12A//SEMA3F
GO:0090066	regulation of anatomical structure size	Biological process	14	199	296	29901	7.10672	1.4e-08	5.54167e-07	CYR61//IGFBP4//HTRA1//ESM1//EVL//KRT17//SFN//EAF2//PSRC1//RTN4//PLEK//TNFRSF12A//SEMA3F//AVIL
GO:0040008	regulation of growth	Biological process	15	234	296	29901	6.47544	1.4e-08	5.54167e-07	CYR61//IGFBP4//HTRA1//ESM1//KRT17//SFN//EAF2//PSRC1//RTN4//AGPAT6//TNFRSF12A//SEMA3F//PROX1//SOCS3//PLA2G2A
GO:0009893	positive regulation of metabolic process	Biological process	24	616	296	29901	3.93572	1.5e-08	5.84016e-07	FOXM1//IL1B//KRT17//HSPA5//CD44//IL11//EREG//FCGR3//PSRC1//FCER1A//SOX21//SOX17//ETV5//EAF2//TNF//ARNTL//BMP7//BHLHA15//MYC//NPAS2//NR4A2//T//TEAD2//TOP2A//YAP1//LBP
GO:0012501	programmed cell death	Biological process	27	774	296	29901	3.52385	1.8e-08	6.89516e-07	MYC//FCGR3//BUB1B//TNFRSF11B//PHLDA1//PGLYRP1//TNFRSF12A//PHLDA3//SHF//SH3KBP1//2010001M09RIK//TMEM173//NIACR1//SPP1//ALOX12//SPP1//TNF//EAF2//JAG2//TCF7//MYC//RHOX5//BMP7//ALDH1A3//BMI1//CD44//PLCG2//NR4A2
GO:0001568	blood vessel development	Biological process	16	278	296	29901	5.81392	2.2e-08	8.29365e-07	ANG2//ELK3//EREG//HBEGF//SOX17//TNFRSF12A//RTN4//CITED1//FOXM1//T//CYR61//THBS1//IL1B//CCL24//PROX1//SOCS3//GJA5
GO:0051094	positive regulation of developmental process	Biological process	14	209	296	29901	6.76668	2.5e-08	9.27734e-07	MSR1//CD276//HSPA5//BMP7//SOCS3//SH3PXD2B//BOC//TGIF1//IL1B//CCL24//TNFRSF12A//PLXNB1//KRT17//PROX1//MYC
GO:0044255	cellular lipid metabolic process	Biological process	20	449	296	29901	4.49964	2.8e-08	1.02308e-06	SLC27A4//ACSBG1//PTGS2//ALDH1A3//RDH10//AGPAT6//ACADS//LBP//FASN//FAAH//APOB48R//PLA2G2A//PLA2G12A//PSAPL1//SPP1//ALOX12//HMGCS2//PLCG2//FCER1A//PITPNC1
GO:0001944	vasculature development	Biological process	16	284	296	29901	5.69109	2.9e-08	1.04356e-06	ANG2//ELK3//EREG//HBEGF//SOX17//TNFRSF12A//RTN4//GJA5//CITED1//FOXM1//T//PROX1//CYR61//THBS1//IL1B//CCL24//SOCS3
GO:0044281	small molecule metabolic process	Biological process	34	1183	296	29901	2.90327	3e-08	1.06343e-06	SLC27A4//ACSBG1//PTGS2//ALDH1A3//RDH10//PCDH12//TNF//PGM2L1//GDPD5//BPGM//NME4//RARS//ASPG//PYCR1//PSAT1//AGPAT6//ACADS//LBP//FASN//FAAH//APOB48R//SPP1//ALOX12//HMGCS2//LDHD//MTAP//DCTD//DCAKD//PMM1//FCER1A//IRG1//PLCG2//NR4A2//SMOX
GO:0023034	intracellular signaling pathway	Biological process	26	743	296	29901	3.53491	3.2e-08	1.11765e-06	LRP5//TCF7//WNT5A//WIF1//NKD1//EREG//HSPA5//ANG2//HBEGF//DUSP22//BAMBI//ADAM10//JAG2//WDR12//BOC//ADAM8//CCND1//SOX17//BMP7//HTRA1//TNF//SOCS3//IL1B//PLAT//PLCG2//LAT2//T
GO:0008219	cell death	Biological process	27	807	296	29901	3.37975	4.3e-08	1.48007e-06	MYC//FCGR3//BUB1B//TNFRSF11B//PHLDA1//PGLYRP1//TNFRSF12A//PHLDA3//SHF//SH3KBP1//2010001M09RIK//TMEM173//NIACR1//SPP1//ALOX12//SPP1//TNF//EAF2//JAG2//TCF7//MYC//RHOX5//BMP7//ALDH1A3//BMI1//CD44//PLCG2//NR4A2
GO:0048589	developmental growth	Biological process	11	124	296	29901	8.96118	4.7e-08	1.59464e-06	HBEGF//RTN4//PTGS2//TNFRSF12A//SEMA3F//PROX1//RDH10//AREG//WNT5A//ROBO1//SOX21
GO:0051179	localization	Biological process	56	2663	296	29901	2.12428	5.4e-08	1.78125e-06	ARNTL//SLC27A4//SEMA3F//NR4A2//FCER1A//FCGR3//LBP//KDELR1//STX11//KPNA2//IPO7//CHRNB1//CP//SLC6A13//SYT12//APOB48R//SLC20A2//ELK3//NOX1//RACGAP1//SLC35E1//G3BP1//CADPS//FAAH//LAT2//SLC1A4//SLC15A3//STEAP1//PITPNC1//TMEM48//MFSD2A//BHLHA15//ABCC4//LRP5//MSR1//SH3KBP1//PLEK//HCK//ADAM10//TNFRSF12A//EVL//CENPE//IL1B//PLAT//PLAU//RHOX5//JUB//RTN4//S100A9//PLCG2//TEX15//RSL1D1//HBEGF//LAT2//TNF//VANGL…
GO:0016265	death	Biological process	27	816	296	29901	3.34247	5.4e-08	1.78125e-06	MYC//FCGR3//BUB1B//TNFRSF11B//PHLDA1//PGLYRP1//TNFRSF12A//PHLDA3//SHF//SH3KBP1//2010001M09RIK//TMEM173//NIACR1//SPP1//ALOX12//SPP1//TNF//EAF2//JAG2//TCF7//MYC//RHOX5//BMP7//ALDH1A3//BMI1//CD44//PLCG2//NR4A2
GO:0060255	regulation of macromolecule metabolic process	Biological process	51	2322	296	29901	2.21872	6.2e-08	2.01712e-06	BMI1//ID3//RHOX5//TGIF1//TNF//NR2C1//SOCS3//ETV5//ARNTL//ELK3//ETV6//REM2//FOXM1//MEF2B//BHLHA15//MYC//NFIL3//NPAS2//NR4A2//ZFP184//T//ELK3//TCF7//TEAD2//SOX21//WDR77//FCER1A//PLCG2//IL1B//TEX15//KRT17//MXD3//HSPA5//CD44//IL11//FCGR3//PSRC1//CD276//S100A9//EREG//CAMTA1//EAF2//CITED1//LPIN1//PROX1//SOX21//SOX17//USP22//CDCA7L//SP6//BMP7//TOP2A//YAP1//UBE2C
GO:0019222	regulation of metabolic process	Biological process	54	2538	296	29901	2.1493	6.7e-08	2.15034e-06	SFN//BMI1//ID3//RHOX5//TGIF1//TNF//NR2C1//FCER1A//DUSP4//SOCS3//EREG//ETV5//ARNTL//ELK3//ETV6//REM2//FOXM1//MEF2B//BHLHA15//MYC//NFIL3//NPAS2//NR4A2//ZFP184//T//ELK3//TCF7//TEAD2//SOX21//WDR77//HSPA5//PLCG2//IL1B//TEX15//KRT17//MXD3//CD44//IL11//FCGR3//PSRC1//CD276//S100A9//CAMTA1//EAF2//CITED1//LPIN1//PROX1//SOX21//SOX17//USP22//CDCA7L//SP6//CENPE//BMP7//TOP2A//YAP1//UBE2C//LBP
GO:0006952	defense response	Biological process	20	475	296	29901	4.25334	7.1e-08	2.24833e-06	IL1B//FCGR3//FCER1A//LBP//CD44//GPX2//TNF//PGLYRP1//DEFA20//CCL7//THBS1//PLA2G7//CCL24//HCK//CITED1//IL1RL1//TMEM173//EREG//CD276//DEFA-RS2//H2-EA
GO:0048514	blood vessel morphogenesis	Biological process	14	233	296	29901	6.06968	9.9e-08	3.09375e-06	ANG2//ELK3//EREG//HBEGF//SOX17//TNFRSF12A//RTN4//CITED1//FOXM1//T//CYR61//THBS1//IL1B//CCL24//PROX1
GO:0009968	negative regulation of signal transduction	Biological process	12	167	296	29901	7.2587	1.2e-07	3.65385e-06	CCND1//SOX17//WIF1//HSPA5//HTRA1//WNT5A//IL1RL1//CD44//BMP7//SOCS3//IL1B//TGIF1
GO:0023057	negative regulation of signaling process	Biological process	12	167	296	29901	7.2587	1.2e-07	3.65385e-06	SOCS3//CCND1//SOX17//WIF1//HSPA5//HTRA1//WNT5A//IL1RL1//CD44//BMP7//IL1B//TGIF1
GO:0051128	regulation of cellular component organization	Biological process	15	276	296	29901	5.49005	1.3e-07	3.90823e-06	EVL//CENPE//CDC42EP1//RTN4//PLEK//STMN1//PSRC1//S100A9//TNFRSF12A//EREG//SEMA3F//FCGR3//PLXNB1//AVIL//PROX1
GO:0009058	biosynthetic process	Biological process	66	3482	296	29901	1.91474	1.4e-07	4.15625e-06	DBF4//BMI1//ID3//RHOX5//TGIF1//TNF//NR2C1//PTGS2//ALDH1A3//RDH10//NME4//CAMTA1//EAF2//ARNTL//ELK3//ETV6//FOXM1//LPIN1//MXD3//MEF2B//BHLHA15//MYC//NFIL3//NPAS2//NR4A2//PROX1//ZFP184//SOX21//SOX17//T//TCF7//TEAD2//USP22//CDCA7L//SOX21//SP6//ETV5//REM2//ELK3//WDR77//RARS//PYCR1//PSAT1//FASN//FAAH//HMGCS2//AKR1C21//LDHD//UROS//AGPAT6//DCTD//IL1B//DCAKD//KRT17//PMM1//ALOX12//FCER1A//PLCG2//CITED1//FCG…
GO:0031323	regulation of cellular metabolic process	Biological process	51	2388	296	29901	2.1574	1.5e-07	4.39815e-06	SFN//BMI1//ID3//RHOX5//TGIF1//TNF//NR2C1//FCER1A//DUSP4//SOCS3//EREG//ETV5//ARNTL//ELK3//ETV6//REM2//FOXM1//MEF2B//BHLHA15//MYC//NFIL3//NPAS2//NR4A2//ZFP184//T//ELK3//TCF7//TEAD2//SOX21//WDR77//HSPA5//IL1B//TEX15//KRT17//MXD3//CD44//IL11//FCGR3//PSRC1//CD276//CAMTA1//EAF2//CITED1//LPIN1//PROX1//SOX21//SOX17//USP22//CDCA7L//SP6//CENPE//BMP7//TOP2A//YAP1
GO:0065008	regulation of biological quality	Biological process	31	1096	296	29901	2.85723	1.8e-07	5.21341e-06	CYR61//IGFBP4//HTRA1//ESM1//GPX2//IL1B//ALDH1A3//RDH10//NOX1//EVL//KDELR1//MT3//TESC//PTGS2//CDC42EP1//CENPE//PLEK//TRIM10//DYRK3//KRT17//SFN//EAF2//PSRC1//RTN4//CHRNB1//BHLHA15//TNFRSF12A//IL11//SEMA3F//TEX15//AVIL
GO:0006915	apoptosis	Biological process	25	763	296	29901	3.30986	2.1e-07	5.86765e-06	MYC//FCGR3//ALOX12//SPP1//TNF//EAF2//JAG2//TCF7//MYC//BMP7//ALDH1A3//BMI1//CD44//NR4A2//BUB1B//TNFRSF11B//PHLDA1//PGLYRP1//TNFRSF12A//PHLDA3//SHF//SH3KBP1//2010001M09RIK//TMEM173//NIACR1//SPP1
GO:0048646	anatomical structure formation involved in morphogenesis	Biological process	18	415	296	29901	4.38146	2.1e-07	5.86765e-06	ANG2//ELK3//EREG//HBEGF//SOX17//TNFRSF12A//RTN4//BMP7//T//TGIF1//VANGL2//CYR61//ALDH1A3//THBS1//PROX1//IL1B//CCL24//RDH10//WNT5A
GO:0010648	negative regulation of cell communication	Biological process	12	176	296	29901	6.88752	2.1e-07	5.86765e-06	SOCS3//CCND1//SOX17//WIF1//HSPA5//HTRA1//WNT5A//IL1RL1//CD44//BMP7//IL1B//TGIF1
GO:0040011	locomotion	Biological process	18	416	296	29901	4.37092	2.2e-07	6.07558e-06	SEMA3F//NR4A2//LBP//TNFRSF12A//CYR61//ROBO1//S100A9//CCL7//CCL24//PLAT//PLAU//RHOX5//JUB//RTN4//FCGR3//IL1B//HBEGF//LRP5//TNF
GO:0045935	positive regulation of nucleobase, nucleoside, nucleotide and nucleic acid metabolic process	Biological process	19	463	296	29901	4.1454	2.3e-07	6.27874e-06	FOXM1//IL1B//PSRC1//EREG//SOX21//SOX17//ETV5//EAF2//TNF//ARNTL//BMP7//IL11//BHLHA15//MYC//NPAS2//NR4A2//T//TEAD2//TOP2A//YAP1
GO:0044249	cellular biosynthetic process	Biological process	64	3390	296	29901	1.9071	2.6e-07	7.01705e-06	DBF4//BMI1//ID3//RHOX5//TGIF1//TNF//NR2C1//PTGS2//ALDH1A3//RDH10//NME4//CAMTA1//EAF2//ARNTL//ELK3//ETV6//FOXM1//LPIN1//MXD3//MEF2B//BHLHA15//MYC//NFIL3//NPAS2//NR4A2//PROX1//ZFP184//SOX21//SOX17//T//TCF7//TEAD2//USP22//CDCA7L//SOX21//SP6//ETV5//REM2//ELK3//WDR77//RARS//PYCR1//PSAT1//FASN//FAAH//LDHD//UROS//HMGCS2//AGPAT6//DCTD//IL1B//DCAKD//KRT17//PMM1//ALOX12//FCER1A//PLCG2//CITED1//FCGR3//PSRC1…
GO:0009887	organ morphogenesis	Biological process	22	616	296	29901	3.60775	2.7e-07	7.20506e-06	CD44//CITED1//MYC//BMP7//VANGL2//T//TGIF1//SOX17//KRT17//ALDH1A3//WNT5A//JAG2//TCF7//TNFRSF11B//PROX1//SOX21//RDH10//BMI1//AREG//ETV5//ROBO1//EREG//TNF
GO:0008284	positive regulation of cell proliferation	Biological process	14	256	296	29901	5.52436	3.1e-07	8.18056e-06	BMI1//TGIF1//EREG//HBEGF//MYC//ALOX12//FOXM1//IL11//MARCKSL1//PROX1//T//CDCA7L//TNF//WDR77//SP6
GO:0051173	positive regulation of nitrogen compound metabolic process	Biological process	19	475	296	29901	4.04068	3.3e-07	8.61264e-06	FOXM1//IL1B//PSRC1//EREG//SOX21//SOX17//ETV5//EAF2//TNF//ARNTL//BMP7//IL11//BHLHA15//MYC//NPAS2//NR4A2//T//TEAD2//TOP2A//YAP1
GO:0010556	regulation of macromolecule biosynthetic process	Biological process	45	2040	296	29901	2.22831	3.7e-07	9.55163e-06	BMI1//ID3//RHOX5//TGIF1//TNF//NR2C1//ETV5//ARNTL//ELK3//ETV6//REM2//FOXM1//MEF2B//BHLHA15//MYC//NFIL3//NPAS2//NR4A2//ZFP184//T//ELK3//TCF7//TEAD2//SOX21//WDR77//IL1B//KRT17//MXD3//FCGR3//PSRC1//CD276//S100A9//FCER1A//EREG//CAMTA1//EAF2//CITED1//LPIN1//PROX1//SOX21//SOX17//USP22//CDCA7L//SP6//BMP7//IL11//TOP2A//YAP1
GO:0035239	tube morphogenesis	Biological process	12	187	296	29901	6.48237	4e-07	1.02151e-05	CD44//CITED1//MYC//T//TGIF1//VANGL2//SOX17//BMP7//RDH10//AREG//WNT5A//ETV5//ROBO1
GO:0080134	regulation of response to stress	Biological process	11	154	296	29901	7.21549	4.3e-07	1.08644e-05	FCGR3//FCER1A//GPX2//TEX15//PLEK//CD44//EREG//DUSP22//IL1B//TNF//CD276//LBP
GO:0045941	positive regulation of transcription	Biological process	18	443	296	29901	4.10452	5.4e-07	1.35e-05	FOXM1//IL1B//PSRC1//SOX21//SOX17//ARNTL//BMP7//IL11//BHLHA15//MYC//NPAS2//NR4A2//T//TEAD2//TNF//TOP2A//YAP1//ETV5//EAF2
GO:0006351	transcription, DNA-dependent	Biological process	31	1156	296	29901	2.70893	5.7e-07	1.39562e-05	BMI1//ID3//RHOX5//TGIF1//TNF//NR2C1//ETV5//ARNTL//ELK3//ETV6//REM2//FOXM1//MEF2B//BHLHA15//MYC//NFIL3//NPAS2//NR4A2//ZFP184//T//ELK3//TCF7//TEAD2//SOX21//WDR77//SP6//IL1B//PSRC1//SOX21//SOX17//BMP7//IL11//TOP2A//YAP1
GO:0042221	response to chemical stimulus	Biological process	24	751	296	29901	3.22824	5.7e-07	1.39562e-05	NR4A2//PLAT//PLAU//LBP//ABCC4//CYR61//ROBO1//S100A9//CCL7//CCL24//GPX2//PTGS2//HSPA5//FCGR3//IL1B//CCND1//AREG//CITED1//IRG1//PLCG2//LPIN1//MYC//SOCS3//SEMA3F//ACSBG1//BOC//ID3
GO:0032774	RNA biosynthetic process	Biological process	31	1160	296	29901	2.69959	6.1e-07	1.47832e-05	BMI1//ID3//RHOX5//TGIF1//TNF//NR2C1//ETV5//ARNTL//ELK3//ETV6//REM2//FOXM1//MEF2B//BHLHA15//MYC//NFIL3//NPAS2//NR4A2//ZFP184//T//ELK3//TCF7//TEAD2//SOX21//WDR77//SP6//IL1B//PSRC1//SOX21//SOX17//BMP7//IL11//TOP2A//YAP1
GO:0060562	epithelial tube morphogenesis	Biological process	10	128	296	29901	7.89194	6.3e-07	1.51136e-05	CD44//CITED1//MYC//T//TGIF1//VANGL2//RDH10//AREG//WNT5A//ETV5//ROBO1
GO:0006355	regulation of transcription, DNA-dependent	Biological process	30	1102	296	29901	2.75001	6.4e-07	1.52e-05	BMI1//ID3//RHOX5//TGIF1//TNF//NR2C1//WDR77//FOXM1//IL1B//MYC//PSRC1//SOX21//SOX17//ARNTL//BMP7//IL11//BHLHA15//NPAS2//NR4A2//T//TEAD2//TOP2A//YAP1//ETV5//ELK3//ETV6//REM2//MEF2B//NFIL3//ZFP184//ELK3//TCF7//SOX21
GO:0048598	embryonic morphogenesis	Biological process	16	362	296	29901	4.46484	7.8e-07	1.83416e-05	LRP5//ODZ4//BMP7//T//TGIF1//VANGL2//ALDH1A3//JAG2//GJA5//WNT5A//TCF7//RDH10//MYC//PROX1//BMI1//SOCS3//CYR61
GO:0010628	positive regulation of gene expression	Biological process	18	457	296	29901	3.97878	8.5e-07	1.97917e-05	FOXM1//IL1B//PSRC1//SOX21//SOX17//ETV5//EAF2//TNF//ARNTL//BMP7//IL11//BHLHA15//MYC//NPAS2//NR4A2//T//TEAD2//TOP2A//YAP1
GO:0051252	regulation of RNA metabolic process	Biological process	30	1121	296	29901	2.7034	9.1e-07	2.0983e-05	BMI1//ID3//RHOX5//TGIF1//TNF//NR2C1//ETV5//ARNTL//ELK3//ETV6//REM2//FOXM1//MEF2B//BHLHA15//MYC//NFIL3//NPAS2//NR4A2//ZFP184//T//ELK3//TCF7//TEAD2//SOX21//WDR77//IL1B//PSRC1//SOX21//SOX17//BMP7//IL11//TOP2A//YAP1
GO:0016070	RNA metabolic process	Biological process	38	1634	296	29901	2.34923	9.6e-07	2.19231e-05	BMI1//ID3//RHOX5//TGIF1//TNF//NR2C1//GEMIN6//ETV5//ARNTL//ELK3//ETV6//REM2//FOXM1//MEF2B//BHLHA15//MYC//NFIL3//NPAS2//NR4A2//ZFP184//T//ELK3//TCF7//TEAD2//SOX21//WDR77//WDR12//GAR1//SP6//TRA2A//MYC//RARS//DUS4L//IL1B//PSRC1//SOX21//SOX17//BMP7//IL11//TOP2A//YAP1
GO:0009889	regulation of biosynthetic process	Biological process	45	2126	296	29901	2.13818	1.1e-06	2.4881e-05	BMI1//ID3//RHOX5//TGIF1//TNF//NR2C1//ETV5//ARNTL//ELK3//ETV6//REM2//FOXM1//MEF2B//BHLHA15//MYC//NFIL3//NPAS2//NR4A2//ZFP184//T//ELK3//TCF7//TEAD2//SOX21//WDR77//IL1B//KRT17//MXD3//FCGR3//PSRC1//CD276//S100A9//FCER1A//EREG//CAMTA1//EAF2//CITED1//LPIN1//PROX1//SOX21//SOX17//USP22//CDCA7L//SP6//BMP7//IL11//TOP2A//YAP1
GO:0006807	nitrogen compound metabolic process	Biological process	63	3461	296	29901	1.83879	1.2e-06	2.68868e-05	DBF4//BMI1//ID3//RHOX5//TGIF1//TNF//NR2C1//GEMIN6//SFN//NME4//TOP2A//FANCD2//MYC//CAMTA1//EAF2//ARNTL//ELK3//ETV6//FOXM1//LPIN1//MXD3//MEF2B//BHLHA15//NFIL3//NPAS2//NR4A2//PROX1//ZFP184//SOX21//SOX17//T//TCF7//TEAD2//USP22//CDCA7L//SOX21//SP6//ETV5//REM2//ELK3//WDR77//WDR12//GAR1//TRA2A//MYC//RARS//ASPG//PYCR1//PSAT1//SPP1//LDHD//UROS//DUS4L//MTAP//DCTD//PGLYRP1//IL1B//TEX15//DCAKD//PSRC1//CITED1…
GO:0016477	cell migration	Biological process	14	290	296	29901	4.87668	1.4e-06	3.0787e-05	SEMA3F//NR4A2//LBP//TNFRSF12A//PLAT//PLAU//JUB//RTN4//FCGR3//IL1B//S100A9//RHOX5//HBEGF//LRP5//TNF
GO:0030855	epithelial cell differentiation	Biological process	10	140	296	29901	7.21549	1.4e-06	3.0787e-05	AGPAT6//PTGS2//SFN//CCND1//KRT17//PROX1//KRT36//WDR77//SOX17//BMP7//ID3
GO:0009966	regulation of signal transduction	Biological process	20	581	296	29901	3.47735	1.7e-06	3.63739e-05	FCER1A//DUSP4//EREG//SOCS3//CCND1//SOX17//WIF1//HSPA5//HTRA1//WNT5A//ECT2//IL1B//TNF//IL1RL1//IL11//CD44//BMP7//DUSP22//ALDH1A3//TGIF1
GO:0023051	regulation of signaling process	Biological process	20	581	296	29901	3.47735	1.7e-06	3.63739e-05	FCER1A//DUSP4//EREG//SOCS3//CCND1//SOX17//WIF1//HSPA5//HTRA1//WNT5A//ECT2//IL1B//TNF//IL1RL1//IL11//CD44//BMP7//DUSP22//ALDH1A3//TGIF1
GO:0080090	regulation of primary metabolic process	Biological process	47	2302	296	29901	2.06246	1.7e-06	3.63739e-05	BMI1//ID3//RHOX5//TGIF1//TNF//NR2C1//SOCS3//ETV5//ARNTL//ELK3//ETV6//REM2//FOXM1//MEF2B//BHLHA15//MYC//NFIL3//NPAS2//NR4A2//ZFP184//T//ELK3//TCF7//TEAD2//SOX21//WDR77//FCER1A//IL1B//TEX15//KRT17//MXD3//HSPA5//CD44//IL11//PSRC1//CAMTA1//EAF2//CITED1//LPIN1//PROX1//SOX21//SOX17//USP22//CDCA7L//SP6//EREG//BMP7//TOP2A//YAP1//UBE2C
GO:0032879	regulation of localization	Biological process	15	340	296	29901	4.45663	1.8e-06	3.81696e-05	IL1B//MSR1//JUB//RTN4//PLCG2//TEX15//RSL1D1//FCER1A//TNF//IL11//SEMA3F//FCGR3//STMN1//HBEGF//CENPE
GO:0048583	regulation of response to stimulus	Biological process	14	302	296	29901	4.6829	2.2e-06	4.62389e-05	FCGR3//FCER1A//GPX2//TEX15//PLEK//CD44//EREG//DUSP22//IL1B//TNF//SOCS3//CD276//H2-EA//PLCG2//LAT2//LBP
GO:0009605	response to external stimulus	Biological process	20	593	296	29901	3.40698	2.3e-06	4.79167e-05	IL1B//FCGR3//FCER1A//LBP//CD44//GPX2//CYR61//ROBO1//S100A9//CCL7//CCL24//THBS1//TNF//PLA2G7//PLEK//EVL//NR4A2//HBEGF//JUB//ELK3//CD276//MYC//SEMA3F
GO:0032787	monocarboxylic acid metabolic process	Biological process	13	262	296	29901	5.01229	2.4e-06	4.95652e-05	SLC27A4//ACSBG1//PTGS2//ALDH1A3//RDH10//AGPAT6//ACADS//LBP//FASN//FAAH//ALOX12//FCER1A//IRG1
GO:0016331	morphogenesis of embryonic epithelium	Biological process	8	87	296	29901	9.28891	2.5e-06	5.07479e-05	T//TGIF1//VANGL2//ALDH1A3//RDH10//BMP7//WNT5A//JAG2
GO:0031326	regulation of cellular biosynthetic process	Biological process	44	2118	296	29901	2.09856	2.5e-06	5.07479e-05	BMI1//ID3//RHOX5//TGIF1//TNF//NR2C1//ETV5//ARNTL//ELK3//ETV6//REM2//FOXM1//MEF2B//BHLHA15//MYC//NFIL3//NPAS2//NR4A2//ZFP184//T//ELK3//TCF7//TEAD2//SOX21//WDR77//IL1B//KRT17//MXD3//FCGR3//PSRC1//CD276//FCER1A//EREG//CAMTA1//EAF2//CITED1//LPIN1//PROX1//SOX21//SOX17//USP22//CDCA7L//SP6//BMP7//IL11//TOP2A//YAP1
GO:0007010	cytoskeleton organization	Biological process	14	308	296	29901	4.59168	2.8e-06	5.63559e-05	ESPL1//PSRC1//EVL//CTTNBP2//AVIL//STMN1//KIF11//CENPE//PROX1//PLEK//LPIN1//S100A9//KRT17//BFSP2
GO:0045893	positive regulation of transcription, DNA-dependent	Biological process	16	401	296	29901	4.0306	3e-06	5.88843e-05	FOXM1//IL1B//PSRC1//ARNTL//BMP7//IL11//BHLHA15//MYC//NPAS2//NR4A2//SOX21//T//TEAD2//TNF//TOP2A//YAP1//SOX17
GO:0007399	nervous system development	Biological process	24	826	296	29901	2.93512	3e-06	5.88843e-05	NR4A2//T//TGIF1//VANGL2//RACGAP1//STMN1//BOC//BMP7//EVL//ROBO1//BMI1//CITED1//SOX21//JAG2//HSPA5//ALDH1A3//TCF7//RTN4//TNFRSF12A//SEMA3F//WNT5A//MT3//PLXNB1//GDPD5
GO:0051254	positive regulation of RNA metabolic process	Biological process	16	402	296	29901	4.02057	3e-06	5.88843e-05	FOXM1//IL1B//PSRC1//SOX21//SOX17//ARNTL//BMP7//IL11//BHLHA15//MYC//NPAS2//NR4A2//T//TEAD2//TNF//TOP2A//YAP1
GO:0008285	negative regulation of cell proliferation	Biological process	11	189	296	29901	5.87929	3.2e-06	6.22951e-05	CD276//PLA2G2A//WNT5A//EAF2//WDR77//BMP7//EREG//PROX1//ROBO1//TGIF1//SFN
GO:0019752	carboxylic acid metabolic process	Biological process	17	455	296	29901	3.77426	3.5e-06	6.70363e-05	SLC27A4//ACSBG1//PTGS2//ALDH1A3//RDH10//RARS//ASPG//PYCR1//PSAT1//AGPAT6//ACADS//LBP//FASN//FAAH//ALOX12//FCER1A//IRG1
GO:0043436	oxoacid metabolic process	Biological process	17	455	296	29901	3.77426	3.5e-06	6.70363e-05	SLC27A4//ACSBG1//PTGS2//ALDH1A3//RDH10//RARS//ASPG//PYCR1//PSAT1//AGPAT6//ACADS//LBP//FASN//FAAH//ALOX12//FCER1A//IRG1
GO:0006082	organic acid metabolic process	Biological process	17	456	296	29901	3.76598	3.6e-06	6.84e-05	SLC27A4//ACSBG1//PTGS2//ALDH1A3//RDH10//RARS//ASPG//PYCR1//PSAT1//AGPAT6//ACADS//LBP//FASN//FAAH//ALOX12//FCER1A//IRG1
GO:0009611	response to wounding	Biological process	15	361	296	29901	4.19738	3.7e-06	6.97421e-05	IL1B//FCGR3//FCER1A//LBP//CD44//GPX2//CCL7//THBS1//TNF//PLA2G7//CCL24//PLEK//EVL//HBEGF//JUB//ELK3//CD276
GO:0051130	positive regulation of cellular component organization	Biological process	8	93	296	29901	8.68963	4.1e-06	7.66732e-05	PLEK//PSRC1//TNFRSF12A//EREG//CENPE//FCGR3//PLXNB1//PROX1
GO:0022414	reproductive process	Biological process	19	569	296	29901	3.37315	4.8e-06	8.90625e-05	REC8//FANCD2//TEX15//JAG2//S100A11//RACGAP1//NKD1//AGPAT6//CCND1//RDH10//WNT5A//TESC//TCF7//RHOX5//CD44//WDR77//BMP7//AREG//EAF2
GO:0042180	cellular ketone metabolic process	Biological process	17	467	296	29901	3.67727	4.9e-06	9.02132e-05	SLC27A4//ACSBG1//PTGS2//ALDH1A3//RDH10//RARS//ASPG//PYCR1//PSAT1//AGPAT6//ACADS//LBP//FASN//FAAH//ALOX12//FCER1A//IRG1
GO:0006366	transcription from RNA polymerase II promoter	Biological process	20	625	296	29901	3.23254	5e-06	9.13462e-05	BMI1//ID3//RHOX5//TGIF1//TNF//NR2C1//WDR77//FOXM1//IL1B//MYC//ARNTL//BMP7//IL11//BHLHA15//NPAS2//NR4A2//SOX21//T//TEAD2//TOP2A//YAP1//SP6
GO:0000003	reproduction	Biological process	19	572	296	29901	3.35546	5.1e-06	9.24618e-05	REC8//FANCD2//TEX15//JAG2//S100A11//RACGAP1//NKD1//AGPAT6//CCND1//RDH10//WNT5A//TESC//TCF7//RHOX5//CD44//WDR77//BMP7//AREG//EAF2
GO:0035295	tube development	Biological process	13	284	296	29901	4.62401	5.9e-06	0.000106155	BMP7//CD44//CITED1//MYC//T//TGIF1//VANGL2//SOX17//WNT5A//GJA5//RDH10//AREG//ETV5//ROBO1
GO:0048870	cell motility	Biological process	14	331	296	29901	4.27262	6.4e-06	0.000113433	SEMA3F//NR4A2//LBP//TNFRSF12A//PLAT//PLAU//RHOX5//JUB//RTN4//FCGR3//IL1B//S100A9//HBEGF//LRP5//TNF
GO:0051674	localization of cell	Biological process	14	331	296	29901	4.27262	6.4e-06	0.000113433	SEMA3F//NR4A2//LBP//TNFRSF12A//PLAT//PLAU//RHOX5//JUB//RTN4//FCGR3//IL1B//S100A9//HBEGF//LRP5//TNF
GO:0048732	gland development	Biological process	11	206	296	29901	5.39411	7.3e-06	0.000128426	BMP7//AGPAT6//CCND1//WNT5A//CD44//WDR77//AREG//TNF//ETV5//ROBO1//EAF2
GO:0007154	cell communication	Biological process	26	993	296	29901	2.64495	7.4e-06	0.000129228	FCER1A//DUSP4//FCGR3//EREG//BHLHA15//WNT5A//SOCS3//CCND1//SOX17//WIF1//HSPA5//HTRA1//NR4A2//ECT2//IL1B//TNF//IL1RL1//IL11//CD44//BMP7//DUSP22//ALDH1A3//TGIF1//GJA5//JAG2//SH3PXD2B
GO:0006955	immune response	Biological process	17	483	296	29901	3.55546	7.7e-06	0.000133485	FCGR3//FCER1A//LBP//PLCG2//GPX2//BMI1//TNF//H2-EA//CITED1//LAT2//IL1RL1//TMEM173//EREG//CD276//SPON2//IL1B//CCL7//PGLYRP1//CCL24
GO:0044260	cellular macromolecule metabolic process	Biological process	76	4723	296	29901	1.62551	7.8e-06	0.000134239	DBF4//BMI1//ID3//RHOX5//TGIF1//TNF//NR2C1//FCER1A//SOCS3//CDCA3//USP22//USP18//PMEPA1//UBE2C//GEMIN6//CCT3//CCT6A//PCDH12//TOP2A//FANCD2//MYC//CAMTA1//EAF2//ARNTL//ELK3//ETV6//FOXM1//LPIN1//MXD3//MEF2B//BHLHA15//NFIL3//NPAS2//NR4A2//PROX1//ZFP184//SOX21//SOX17//T//TCF7//TEAD2//CDCA7L//SOX21//SP6//ETV5//REM2//ELK3//WDR77//WDR12//GAR1//TRA2A//MYC//RARS//ADAM10//BUB1B//CCND1//CDK1//HCK//WNT5A//DYRK3…
GO:0006357	regulation of transcription from RNA polymerase II promoter	Biological process	19	590	296	29901	3.25309	7.9e-06	0.000134982	BMI1//ID3//RHOX5//TGIF1//TNF//NR2C1//FOXM1//IL1B//MYC//ARNTL//BMP7//IL11//BHLHA15//NPAS2//NR4A2//SOX21//T//TEAD2//TOP2A//YAP1//WDR77
GO:0019219	regulation of nucleobase, nucleoside, nucleotide and nucleic acid metabolic process	Biological process	41	2003	296	29901	2.06774	8.2e-06	0.000139107	BMI1//ID3//RHOX5//TGIF1//TNF//NR2C1//ETV5//ARNTL//ELK3//ETV6//REM2//FOXM1//MEF2B//BHLHA15//MYC//NFIL3//NPAS2//NR4A2//ZFP184//T//ELK3//TCF7//TEAD2//SOX21//WDR77//IL1B//TEX15//MXD3//PSRC1//CAMTA1//EAF2//CITED1//LPIN1//PROX1//SOX21//SOX17//USP22//CDCA7L//SP6//EREG//BMP7//IL11//TOP2A//YAP1
GO:0001525	angiogenesis	Biological process	10	173	296	29901	5.83913	9.5e-06	0.000160018	CYR61//ANG2//THBS1//IL1B//CCL24//ELK3//EREG//HBEGF//SOX17//TNFRSF12A//RTN4
GO:0051171	regulation of nitrogen compound metabolic process	Biological process	41	2018	296	29901	2.05237	9.8e-06	0.000163908	BMI1//ID3//RHOX5//TGIF1//TNF//NR2C1//ETV5//ARNTL//ELK3//ETV6//REM2//FOXM1//MEF2B//BHLHA15//MYC//NFIL3//NPAS2//NR4A2//ZFP184//T//ELK3//TCF7//TEAD2//SOX21//WDR77//IL1B//TEX15//MXD3//PSRC1//CAMTA1//EAF2//CITED1//LPIN1//PROX1//SOX21//SOX17//USP22//CDCA7L//SP6//EREG//BMP7//IL11//TOP2A//YAP1
GO:0003006	reproductive developmental process	Biological process	12	255	296	29901	4.75374	1e-05	0.000166084	REC8//RDH10//WNT5A//TESC//TCF7//TEX15//RHOX5//CD44//WDR77//BMP7//AREG//EAF2
GO:0051093	negative regulation of developmental process	Biological process	11	215	296	29901	5.16831	1.1e-05	0.000180172	ANG2//THBS1//RTN4//CCND1//PLA2G2A//TNFRSF11B//CITED1//SEMA3F//BMP7//MT3//WNT5A
GO:0006139	nucleobase, nucleoside, nucleotide and nucleic acid metabolic process	Biological process	56	3156	296	29901	1.79244	1.1e-05	0.000180172	DBF4//BMI1//ID3//RHOX5//TGIF1//TNF//NR2C1//GEMIN6//NME4//TOP2A//FANCD2//MYC//CAMTA1//EAF2//ARNTL//ELK3//ETV6//FOXM1//LPIN1//MXD3//MEF2B//BHLHA15//NFIL3//NPAS2//NR4A2//PROX1//ZFP184//SOX21//SOX17//T//TCF7//TEAD2//USP22//CDCA7L//SOX21//SP6//ETV5//REM2//ELK3//WDR77//WDR12//GAR1//TRA2A//MYC//RARS//LDHD//DUS4L//MTAP//DCTD//IL1B//TEX15//DCAKD//PSRC1//CITED1//EREG//BMP7//IL11//YAP1//SFN
GO:0001763	morphogenesis of a branching structure	Biological process	9	141	296	29901	6.44789	1.2e-05	0.000193878	CD44//CITED1//MYC//BMP7//RDH10//AREG//WNT5A//SOCS3//TNF//ETV5
GO:0007059	chromosome segregation	Biological process	6	52	296	29901	11.6558	1.2e-05	0.000193878	CENPE//SGOL1//ESPL1//TOP2A//REC8//KIF2C
GO:0051493	regulation of cytoskeleton organization	Biological process	7	78	296	29901	9.06562	1.3e-05	0.000207215	EVL//PLEK//STMN1//PSRC1//AVIL//CENPE//PROX1
GO:0045449	regulation of transcription	Biological process	39	1900	296	29901	2.0735	1.3e-05	0.000207215	BMI1//ID3//RHOX5//TGIF1//TNF//NR2C1//ETV5//ARNTL//ELK3//ETV6//REM2//FOXM1//MEF2B//BHLHA15//MYC//NFIL3//NPAS2//NR4A2//ZFP184//T//ELK3//TCF7//TEAD2//SOX21//WDR77//IL1B//MXD3//PSRC1//SOX21//SOX17//EAF2//BMP7//IL11//TOP2A//YAP1//CAMTA1//CITED1//LPIN1//PROX1//USP22//CDCA7L//SP6
GO:0050673	epithelial cell proliferation	Biological process	7	79	296	29901	8.95086	1.4e-05	0.000220199	CCND1//PLA2G2A//WNT5A//TNF//AREG//EAF2//WDR77
GO:0010646	regulation of cell communication	Biological process	20	672	296	29901	3.00646	1.4e-05	0.000220199	FCER1A//DUSP4//EREG//SOCS3//CCND1//SOX17//WIF1//HSPA5//HTRA1//WNT5A//ECT2//IL1B//TNF//IL1RL1//IL11//CD44//BMP7//DUSP22//ALDH1A3//TGIF1
GO:0045944	positive regulation of transcription from RNA polymerase II promoter	Biological process	14	357	296	29901	3.96145	1.5e-05	0.000234375	FOXM1//IL1B//ARNTL//BMP7//IL11//BHLHA15//MYC//NPAS2//NR4A2//SOX21//T//TEAD2//TNF//TOP2A//YAP1
GO:0006631	fatty acid metabolic process	Biological process	10	183	296	29901	5.52005	1.6e-05	0.00024359	SLC27A4//ACSBG1//PTGS2//FASN//FAAH//LBP//ALOX12//FCER1A//AGPAT6//ACADS
GO:0030574	collagen catabolic process	Biological process	4	16	296	29901	25.2542	1.6e-05	0.00024359	MMP10//MMP11//MMP13//MMP7
GO:0006935	chemotaxis	Biological process	8	112	296	29901	7.21549	1.6e-05	0.00024359	LBP//FCGR3//IL1B//S100A9//SEMA3F//CYR61//ROBO1//CCL7//CCL24
GO:0042330	taxis	Biological process	8	112	296	29901	7.21549	1.6e-05	0.00024359	LBP//CYR61//ROBO1//S100A9//CCL7//CCL24//FCGR3//IL1B//SEMA3F
GO:0048468	cell development	Biological process	20	681	296	29901	2.96672	1.7e-05	0.000257166	REC8//SEMA3F//AGPAT6//STMN1//BOC//BMP7//EVL//ROBO1//RDH10//NR4A2//PROX1//RTN4//PLA2G2A//RHOX5//TGIF1//TNFRSF12A//BHLHA15//SOX21//MT3//PLXNB1
GO:0048858	cell projection morphogenesis	Biological process	11	229	296	29901	4.85234	2e-05	0.000289634	STMN1//BOC//BMP7//EVL//ROBO1//NR4A2//RTN4//VANGL2//TNFRSF12A//SEMA3F//PLXNB1
GO:0060284	regulation of cell development	Biological process	9	150	296	29901	6.06101	2e-05	0.000289634	RTN4//BOC//TGIF1//TNFRSF12A//SEMA3F//BMP7//MT3//PLXNB1//PROX1
GO:0010638	positive regulation of organelle organization	Biological process	5	34	296	29901	14.8554	2e-05	0.000289634	PLEK//PSRC1//EREG//CENPE//PROX1
GO:0031076	embryonic camera-type eye development	Biological process	4	17	296	29901	23.7687	2e-05	0.000289634	ALDH1A3//PROX1//BMP7//RDH10
GO:0044243	multicellular organismal catabolic process	Biological process	4	17	296	29901	23.7687	2e-05	0.000289634	MMP10//MMP11//MMP13//MMP7
GO:0051495	positive regulation of cytoskeleton organization	Biological process	4	17	296	29901	23.7687	2e-05	0.000289634	PLEK//PSRC1//CENPE//PROX1
GO:0060560	developmental growth involved in morphogenesis	Biological process	4	17	296	29901	23.7687	2e-05	0.000289634	RDH10//AREG//WNT5A//ROBO1
GO:0080135	regulation of cellular response to stress	Biological process	6	57	296	29901	10.6334	2.1e-05	0.000302273	FCER1A//TEX15//CD44//DUSP22//IL1B//TNF
GO:0007409	axonogenesis	Biological process	10	190	296	29901	5.31668	2.2e-05	0.000314759	BOC//BMP7//EVL//ROBO1//NR4A2//RTN4//TNFRSF12A//SEMA3F//PLXNB1//STMN1
GO:0010468	regulation of gene expression	Biological process	41	2099	296	29901	1.97317	2.4e-05	0.000341317	BMI1//ID3//RHOX5//TGIF1//TNF//NR2C1//ETV5//ARNTL//ELK3//ETV6//REM2//FOXM1//MEF2B//BHLHA15//MYC//NFIL3//NPAS2//NR4A2//ZFP184//T//ELK3//TCF7//TEAD2//SOX21//WDR77//IL1B//KRT17//MXD3//PSRC1//CAMTA1//EAF2//CITED1//LPIN1//PROX1//SOX21//SOX17//USP22//CDCA7L//SP6//BMP7//IL11//TOP2A//YAP1//PLCG2
GO:0033043	regulation of organelle organization	Biological process	8	119	296	29901	6.79105	2.5e-05	0.000353423	EVL//CENPE//PLEK//STMN1//PSRC1//EREG//AVIL//PROX1
GO:0000902	cell morphogenesis	Biological process	14	378	296	29901	3.74137	2.8e-05	0.000393491	STMN1//BOC//BMP7//EVL//ROBO1//CDC42EP1//NR4A2//RTN4//VANGL2//TNFRSF12A//SEMA3F//PLXNB1//PROX1//ECT2
GO:0032990	cell part morphogenesis	Biological process	11	239	296	29901	4.64931	2.9e-05	0.000402778	STMN1//BOC//BMP7//EVL//ROBO1//NR4A2//RTN4//VANGL2//TNFRSF12A//SEMA3F//PLXNB1
GO:0048568	embryonic organ development	Biological process	11	239	296	29901	4.64931	2.9e-05	0.000402778	ALDH1A3//TCF7//T//RDH10//MYC//PROX1//BMP7//BMI1//SOCS3//CYR61//CITED1//PCDH12
GO:0045597	positive regulation of cell differentiation	Biological process	9	159	296	29901	5.71794	3.1e-05	0.000425578	MSR1//SH3PXD2B//BOC//TGIF1//CD276//TNFRSF12A//PLXNB1//BMP7//SOCS3
GO:0006954	inflammatory response	Biological process	11	241	296	29901	4.61073	3.1e-05	0.000425578	IL1B//FCGR3//FCER1A//LBP//CD44//GPX2//CD276//CCL7//THBS1//TNF//PLA2G7//CCL24
GO:0007167	enzyme linked receptor protein signaling pathway	Biological process	13	333	296	29901	3.9436	3.2e-05	0.000436782	EREG//ANG2//HBEGF//DUSP22//BAMBI//BMP7//HSPA5//HTRA1//WNT5A//SOCS3//IL1B//PLAT//T
GO:0048812	neuron projection morphogenesis	Biological process	10	203	296	29901	4.9762	3.8e-05	0.000512784	STMN1//BOC//BMP7//EVL//ROBO1//NR4A2//RTN4//TNFRSF12A//SEMA3F//PLXNB1
GO:0042325	regulation of phosphorylation	Biological process	11	246	296	29901	4.51702	3.8e-05	0.000512784	SFN//FCER1A//DUSP4//SOCS3//TNF//EREG//HSPA5//CD44//IL11//IL1B//CENPE
GO:0000904	cell morphogenesis involved in differentiation	Biological process	11	252	296	29901	4.40947	4.7e-05	0.000623603	STMN1//BOC//BMP7//EVL//ROBO1//NR4A2//RTN4//TNFRSF12A//SEMA3F//PLXNB1//PROX1
GO:0019220	regulation of phosphate metabolic process	Biological process	11	252	296	29901	4.40947	4.7e-05	0.000623603	SFN//FCER1A//DUSP4//SOCS3//TNF//EREG//HSPA5//CD44//IL11//IL1B//CENPE
GO:0051174	regulation of phosphorus metabolic process	Biological process	11	252	296	29901	4.40947	4.7e-05	0.000623603	SFN//FCER1A//DUSP4//SOCS3//TNF//EREG//HSPA5//CD44//IL11//IL1B//CENPE
GO:0022612	gland morphogenesis	Biological process	7	96	296	29901	7.36582	4.9e-05	0.000642956	BMP7//WNT5A//CD44//AREG//TNF//ETV5//ROBO1
GO:0032963	collagen metabolic process	Biological process	4	21	296	29901	19.2413	4.9e-05	0.000642956	MMP10//MMP11//MMP13//MMP7
GO:0009617	response to bacterium	Biological process	9	169	296	29901	5.3796	5.1e-05	0.000661885	LBP//TNF//PGLYRP1//DEFA20//HCK//GPX2//CITED1//IL1B//IRG1//PLCG2
GO:0030030	cell projection organization	Biological process	13	349	296	29901	3.76281	5.1e-05	0.000661885	STMN1//BOC//BMP7//EVL//ROBO1//NR4A2//JUB//RTN4//LPIN1//VANGL2//TNFRSF12A//SEMA3F//PLXNB1
GO:0016042	lipid catabolic process	Biological process	8	132	296	29901	6.12224	5.3e-05	0.000684103	LBP//PLCG2//SLC27A4//IL1B//ASPG//PLA2G2A//PLA2G7//PLA2G12A
GO:0048667	cell morphogenesis involved in neuron differentiation	Biological process	10	213	296	29901	4.74258	5.7e-05	0.000731757	STMN1//BOC//BMP7//EVL//ROBO1//NR4A2//RTN4//TNFRSF12A//SEMA3F//PLXNB1
GO:0007017	microtubule-based process	Biological process	9	172	296	29901	5.28577	5.8e-05	0.000740591	ESPL1//PSRC1//KIF11//KIF4//KIFC1//CENPE//KIF18B//KIF2C//STMN1
GO:0044259	multicellular organismal macromolecule metabolic process	Biological process	4	22	296	29901	18.3667	6e-05	0.000762032	MMP10//MMP11//MMP13//MMP7
GO:0032989	cellular component morphogenesis	Biological process	14	413	296	29901	3.4243	7.3e-05	0.000922207	ECT2//STMN1//BOC//BMP7//EVL//ROBO1//CDC42EP1//NR4A2//PROX1//RTN4//VANGL2//TNFRSF12A//SEMA3F//PLXNB1
GO:0002376	immune system process	Biological process	21	820	296	29901	2.58702	7.8e-05	0.000980159	FCGR3//FCER1A//LBP//PLCG2//H2-EA//GPX2//SPON2//IL1B//CCL7//TNF//PGLYRP1//CCL24//LAT2//TMEM173//BMI1//TRIM10//DYRK3//S100A9//CITED1//CD276//JAG2//IL1RL1//EREG
GO:0048754	branching morphogenesis of a tube	Biological process	7	104	296	29901	6.79921	8.1e-05	0.0010125	CD44//CITED1//MYC//RDH10//AREG//WNT5A//ETV5//BMP7
GO:0006508	proteolysis	Biological process	23	952	296	29901	2.44053	8.6e-05	0.00106937	SOCS3//CDCA3//USP22//USP18//PMEPA1//UBE2C//ASPRV1//SP6//ADAM10//PRSS12//ESPL1//ADAM8//CPA3//MCPT4//MMP10//MMP11//MMP13//MMP7//PLAT//PLAU//PRSS27//HTRA1//OMA1
GO:0010467	gene expression	Biological process	51	3004	296	29901	1.715	9.4e-05	0.00116276	BMI1//ID3//RHOX5//TGIF1//TNF//NR2C1//GEMIN6//CAMTA1//EAF2//ARNTL//ELK3//ETV6//FOXM1//LPIN1//MXD3//MEF2B//BHLHA15//MYC//NFIL3//NPAS2//NR4A2//PROX1//ZFP184//SOX21//SOX17//T//TCF7//TEAD2//USP22//CDCA7L//SOX21//SP6//ETV5//REM2//ELK3//WDR77//WDR12//GAR1//TRA2A//MYC//RARS//ASPRV1//ADAM10//DUS4L//PLCG2//IL1B//KRT17//PRSS12//PSRC1//CITED1//BMP7//IL11//TOP2A//YAP1
GO:0055114	oxidation reduction	Biological process	18	651	296	29901	2.79309	9.9e-05	0.00121795	NOX1//FAAH//STEAP1//ACADS//ALOX12//CP//FASN//GPX2//PTGS2//PYCR1//SMOX//LDHD//ALDH1A3//GFOD2//DUS4L//LBP//AKR1C21//RDH10
GO:0030850	prostate gland development	Biological process	5	47	296	29901	10.7465	0.0001	0.00121795	CD44//WDR77//BMP7//WNT5A//EAF2
GO:0044087	regulation of cellular component biogenesis	Biological process	6	75	296	29901	8.08135	0.0001	0.00121795	EVL//STMN1//PSRC1//PLEK//AVIL//PROX1
GO:0043009	chordate embryonic development	Biological process	14	430	296	29901	3.28892	0.00011	0.00132614	ADAM10//BMI1//SOX21//CCNB1//RDH10//T//HBEGF//TGIF1//VANGL2//TCF7//SOCS3//CYR61//CITED1//PCDH12
GO:0051234	establishment of localization	Biological process	42	2324	296	29901	1.82561	0.00011	0.00132614	ARNTL//SLC27A4//FCER1A//FCGR3//KDELR1//STX11//KPNA2//IPO7//CHRNB1//CP//SLC6A13//LBP//SYT12//APOB48R//SLC20A2//ELK3//NOX1//RACGAP1//SLC35E1//G3BP1//CADPS//FAAH//LAT2//SLC1A4//SLC15A3//STEAP1//PITPNC1//TMEM48//MFSD2A//BHLHA15//ABCC4//LRP5//MSR1//SH3KBP1//PLEK//HCK//ADAM10//EVL//IL1B//PLCG2//LAT2//CENPE//TNF//IL11
GO:0050680	negative regulation of epithelial cell proliferation	Biological process	4	26	296	29901	15.5411	0.00012	0.00141791	EAF2//WDR77//PLA2G2A//WNT5A
GO:0009059	macromolecule biosynthetic process	Biological process	48	2797	296	29901	1.73358	0.00012	0.00141791	DBF4//BMI1//ID3//RHOX5//TGIF1//TNF//NR2C1//CAMTA1//EAF2//ARNTL//ELK3//ETV6//FOXM1//LPIN1//MXD3//MEF2B//BHLHA15//MYC//NFIL3//NPAS2//NR4A2//PROX1//ZFP184//SOX21//SOX17//T//TCF7//TEAD2//USP22//CDCA7L//SOX21//SP6//ETV5//REM2//ELK3//WDR77//RARS//IL1B//KRT17//FCGR3//PSRC1//CD276//S100A9//PHLDA1//FCER1A//EREG//CITED1//BMP7//IL11//TOP2A//YAP1
GO:0009792	embryonic development ending in birth or egg hatching	Biological process	14	434	296	29901	3.25861	0.00012	0.00141791	ADAM10//BMI1//SOX21//CCNB1//RDH10//T//HBEGF//TGIF1//VANGL2//TCF7//SOCS3//CYR61//CITED1//PCDH12
GO:0043410	positive regulation of MAPKKK cascade	Biological process	5	49	296	29901	10.3078	0.00012	0.00141791	DUSP22//IL1B//TNF//CD44//IL11
GO:0019538	protein metabolic process	Biological process	45	2569	296	29901	1.76947	0.00013	0.00152094	FCER1A//SOCS3//CDCA3//USP22//USP18//PMEPA1//UBE2C//TNF//CCT3//CCT6A//RARS//ADAM10//BUB1B//CCND1//CDK1//HCK//WNT5A//DYRK3//CCNB1//NUAK1//DUSP22//DUSP4//ESPL1//ADAM8//CPA3//MCPT4//MMP10//MMP11//MMP13//MMP7//PLAT//PLAU//PRSS12//PRSS27//HTRA1//OMA1//ASPRV1//SP6//KRT17//MYC//BMI1//HSPA5//CD44//IL11//ARNTL//HSPH1
GO:0007178	transmembrane receptor protein serine/threonine kinase signaling pathway	Biological process	7	112	296	29901	6.31356	0.00013	0.00152094	DUSP22//BAMBI//BMP7//HSPA5//HTRA1//WNT5A//T
GO:0060688	regulation of morphogenesis of a branching structure	Biological process	4	27	296	29901	14.9655	0.00014	0.00160628	BMP7//WNT5A//TNF//ETV5
GO:0009967	positive regulation of signal transduction	Biological process	8	152	296	29901	5.31668	0.00014	0.00160628	EREG//IL1B//TNF//IL11//DUSP22//ALDH1A3//FCER1A//CD44
GO:0023056	positive regulation of signaling process	Biological process	8	152	296	29901	5.31668	0.00014	0.00160628	EREG//IL1B//TNF//IL11//DUSP22//ALDH1A3//FCER1A//CD44
GO:0006350	transcription	Biological process	39	2123	296	29901	1.8557	0.00014	0.00160628	BMI1//ID3//RHOX5//TGIF1//TNF//NR2C1//ETV5//ARNTL//ELK3//ETV6//REM2//FOXM1//MEF2B//BHLHA15//MYC//NFIL3//NPAS2//NR4A2//ZFP184//T//ELK3//TCF7//TEAD2//SOX21//WDR77//SP6//IL1B//MXD3//PSRC1//CAMTA1//EAF2//CITED1//LPIN1//PROX1//SOX21//SOX17//USP22//CDCA7L//BMP7//IL11//TOP2A//YAP1
GO:0043254	regulation of protein complex assembly	Biological process	5	51	296	29901	9.90362	0.00015	0.00170455	EVL//STMN1//PSRC1//PLEK//AVIL
GO:0060602	branch elongation of an epithelium	Biological process	3	11	296	29901	27.5501	0.00015	0.00170455	RDH10//AREG//WNT5A
GO:0044236	multicellular organismal metabolic process	Biological process	4	28	296	29901	14.431	0.00016	0.00180095	MMP10//MMP11//MMP13//MMP7
GO:0007626	locomotory behavior	Biological process	10	242	296	29901	4.17425	0.00016	0.00180095	LBP//CYR61//ROBO1//S100A9//CCL7//CCL24//NR4A2//FCGR3//IL1B//NPAS2//SEMA3F
GO:0051129	negative regulation of cellular component organization	Biological process	6	82	296	29901	7.39148	0.00017	0.00189554	EVL//CENPE//RTN4//STMN1//SEMA3F//AVIL
GO:0031175	neuron projection development	Biological process	10	244	296	29901	4.14004	0.00017	0.00189554	STMN1//BOC//BMP7//EVL//ROBO1//NR4A2//RTN4//TNFRSF12A//SEMA3F//PLXNB1
GO:0051716	cellular response to stimulus	Biological process	16	564	296	29901	2.86573	0.00018	0.00198837	LBP//FANCD2//HSPA5//CDK1//TNF//WNT5A//FCER1A//TEX15//FCGR3//IL1B//S100A9//CCND1//NR4A2//LPIN1//CD44//DUSP22//SOCS3
GO:0030308	negative regulation of cell growth	Biological process	4	29	296	29901	13.9334	0.00018	0.00198837	RTN4//SEMA3F//EAF2//PSRC1
GO:0048596	embryonic camera-type eye morphogenesis	Biological process	3	12	296	29901	25.2542	0.0002	0.00218894	ALDH1A3//PROX1//BMP7
GO:0006810	transport	Biological process	41	2309	296	29901	1.79372	0.0002	0.00218894	ARNTL//SLC27A4//FCER1A//FCGR3//KDELR1//STX11//KPNA2//IPO7//CHRNB1//CP//SLC20A2//ELK3//RACGAP1//STEAP1//SLC1A4//SLC6A13//BHLHA15//ABCC4//SLC15A3//LAT2//LBP//APOB48R//PITPNC1//CADPS//LRP5//MSR1//SH3KBP1//PLEK//HCK//ADAM10//EVL//IL1B//TMEM48//PLCG2//LAT2//TNF//IL11//MFSD2A//SYT12//NOX1//SLC35E1//G3BP1//FAAH
GO:0022008	neurogenesis	Biological process	15	513	296	29901	2.95371	0.00021	0.00224662	NR4A2//RACGAP1//STMN1//BOC//BMP7//EVL//ROBO1//JAG2//RTN4//TGIF1//TNFRSF12A//SOX21//SEMA3F//MT3//PLXNB1
GO:0009607	response to biotic stimulus	Biological process	11	298	296	29901	3.72881	0.00021	0.00224662	LBP//TNF//PGLYRP1//DEFA20//HSPA5//HCK//GPX2//CCND1//CITED1//IL1B//IRG1//PLCG2
GO:0050767	regulation of neurogenesis	Biological process	7	121	296	29901	5.84395	0.00021	0.00224662	RTN4//TGIF1//TNFRSF12A//SEMA3F//BMP7//MT3//PLXNB1
GO:0060603	mammary gland duct morphogenesis	Biological process	4	30	296	29901	13.4689	0.00021	0.00224662	AREG//WNT5A//ETV5//ROBO1
GO:0042035	regulation of cytokine biosynthetic process	Biological process	5	55	296	29901	9.18335	0.00021	0.00224662	FCGR3//CD276//IL1B//FCER1A//EREG
GO:0030879	mammary gland development	Biological process	6	86	296	29901	7.04769	0.00022	0.00234305	AGPAT6//CCND1//AREG//WNT5A//ETV5//ROBO1
GO:0006793	phosphorus metabolic process	Biological process	22	952	296	29901	2.33442	0.00023	0.00239583	SFN//FCER1A//DUSP4//SOCS3//TNF//EREG//ADAM10//BUB1B//CCND1//CDK1//HCK//WNT5A//DYRK3//CCNB1//NUAK1//DUSP22//DUSP4//HSPA5//CD44//IL11//IL1B//CENPE
GO:0006796	phosphate metabolic process	Biological process	22	952	296	29901	2.33442	0.00023	0.00239583	SFN//FCER1A//DUSP4//SOCS3//TNF//EREG//ADAM10//BUB1B//CCND1//CDK1//HCK//WNT5A//DYRK3//CCNB1//NUAK1//DUSP22//DUSP4//HSPA5//CD44//IL11//IL1B//CENPE
GO:0007018	microtubule-based movement	Biological process	6	87	296	29901	6.96668	0.00023	0.00239583	KIF11//KIF4//KIFC1//CENPE//KIF18B//KIF2C
GO:0007254	JNK cascade	Biological process	5	56	296	29901	9.01937	0.00023	0.00239583	FCER1A//DUSP22//IL1B//TNF//WNT5A
GO:0016310	phosphorylation	Biological process	20	824	296	29901	2.45187	0.00023	0.00239583	SFN//FCER1A//DUSP4//SOCS3//TNF//EREG//ADAM10//BUB1B//CCND1//CDK1//HCK//WNT5A//DYRK3//CCNB1//NUAK1//HSPA5//CD44//IL11//IL1B//CENPE
GO:0010647	positive regulation of cell communication	Biological process	8	165	296	29901	4.89779	0.00025	0.00259279	EREG//IL1B//TNF//IL11//DUSP22//ALDH1A3//FCER1A//CD44
GO:0030307	positive regulation of cell growth	Biological process	3	13	296	29901	23.3116	0.00026	0.00268478	TNFRSF12A//KRT17//SFN
GO:0032270	positive regulation of cellular protein metabolic process	Biological process	6	90	296	29901	6.73446	0.00028	0.00282979	KRT17//HSPA5//CD44//IL11//TNF//FCER1A
GO:0043408	regulation of MAPKKK cascade	Biological process	6	90	296	29901	6.73446	0.00028	0.00282979	FCER1A//IL11//DUSP22//IL1B//TNF//CD44
GO:0051641	cellular localization	Biological process	17	647	296	29901	2.65423	0.00028	0.00282979	ARNTL//FCER1A//FCGR3//KPNA2//IPO7//KDELR1//BHLHA15//STX11//CADPS//PLEK//ADAM10//EVL//CENPE//TEX15//LAT2//IL11//TNF//IL1B
GO:0044283	small molecule biosynthetic process	Biological process	10	259	296	29901	3.90027	0.00028	0.00282979	PTGS2//PYCR1//PSAT1//FASN//FAAH//PMM1//ALOX12//FCER1A//PLCG2//NR4A2
GO:0000165	MAPKKK cascade	Biological process	8	168	296	29901	4.81033	0.00028	0.00282979	FCER1A//DUSP4//TNF//WNT5A//IL11//DUSP22//IL1B//CD44
GO:0048699	generation of neurons	Biological process	14	476	296	29901	2.97109	0.00032	0.00315353	NR4A2//RACGAP1//STMN1//BOC//BMP7//EVL//ROBO1//JAG2//RTN4//TGIF1//TNFRSF12A//SEMA3F//MT3//PLXNB1
GO:0048584	positive regulation of response to stimulus	Biological process	8	171	296	29901	4.72594	0.00032	0.00315353	FCGR3//FCER1A//EREG//DUSP22//IL1B//TNF//H2-EA//PLCG2//LAT2//LBP
GO:0031098	stress-activated protein kinase signaling pathway	Biological process	5	60	296	29901	8.41807	0.00032	0.00315353	TNF//WNT5A//FCER1A//DUSP22//IL1B
GO:0046330	positive regulation of JNK cascade	Biological process	3	14	296	29901	21.6465	0.00032	0.00315353	DUSP22//IL1B//TNF
GO:0070304	positive regulation of stress-activated protein kinase signaling pathway	Biological process	3	14	296	29901	21.6465	0.00032	0.00315353	DUSP22//IL1B//TNF
GO:0048608	reproductive structure development	Biological process	7	130	296	29901	5.43937	0.00032	0.00315353	RDH10//WNT5A//TESC//CD44//WDR77//BMP7//EAF2
GO:0048638	regulation of developmental growth	Biological process	4	34	296	29901	11.8843	0.00035	0.00343492	RTN4//TNFRSF12A//SEMA3F//PROX1
GO:0010033	response to organic substance	Biological process	13	426	296	29901	3.08268	0.00036	0.00351852	NR4A2//HSPA5//CCND1//AREG//CITED1//IL1B//IRG1//LBP//PLCG2//LPIN1//MYC//SOCS3//ACSBG1//BOC//ID3//CYR61
GO:0007242	intracellular signaling cascade	Biological process	22	989	296	29901	2.24709	0.00038	0.00369877	FCER1A//DUSP4//CDK1//BHLHA15//TNF//WNT5A//REM2//ARL4C//CDC42EP1//ECT2//IL1B//IL1RL1//IL11//CD44//DUSP22//ALDH1A3//TGIF1//PLEK//SOCS3//STMN1//PLCG2//RACGAP1
GO:0007127	meiosis I	Biological process	4	35	296	29901	11.5448	0.00039	0.00376524	TEX15//FANCD2//REC8//ESPL1
GO:0045792	negative regulation of cell size	Biological process	4	35	296	29901	11.5448	0.00039	0.00376524	EAF2//PSRC1//RTN4//SEMA3F
GO:0030261	chromosome condensation	Biological process	3	15	296	29901	20.2034	0.0004	0.00383065	NCAPH//TOP2A//NCAPD2
GO:0045793	positive regulation of cell size	Biological process	3	15	296	29901	20.2034	0.0004	0.00383065	KRT17//SFN//TNFRSF12A
GO:0008544	epidermis development	Biological process	7	135	296	29901	5.23791	0.00041	0.003895	TNFRSF19//PTGS2//SFN//KRT17//SLC27A4//ASPRV1//KRT36
GO:0009719	response to endogenous stimulus	Biological process	7	135	296	29901	5.23791	0.00041	0.003895	NR4A2//AREG//CITED1//LPIN1//SOCS3//IL1B//ACSBG1
GO:0007126	meiosis	Biological process	6	97	296	29901	6.24847	0.00042	0.00395833	ESPL1//TEX15//FANCD2//REC8//SGOL1//MKI67
GO:0051327	M phase of meiotic cell cycle	Biological process	6	97	296	29901	6.24847	0.00042	0.00395833	MKI67//REC8//ESPL1//TEX15//FANCD2//SGOL1
GO:0051960	regulation of nervous system development	Biological process	7	136	296	29901	5.1994	0.00043	0.0040049	RTN4//TGIF1//TNFRSF12A//SEMA3F//BMP7//MT3//PLXNB1
GO:0042108	positive regulation of cytokine biosynthetic process	Biological process	4	36	296	29901	11.2241	0.00043	0.0040049	FCGR3//IL1B//FCER1A//EREG
GO:0060711	labyrinthine layer development	Biological process	4	36	296	29901	11.2241	0.00043	0.0040049	SOCS3//CYR61//CITED1//PCDH12
GO:0001701	in utero embryonic development	Biological process	10	274	296	29901	3.68675	0.00044	0.00406615	HBEGF//SOCS3//CYR61//CITED1//PCDH12//ADAM10//BMI1//SOX21//CCNB1//RDH10
GO:0051321	meiotic cell cycle	Biological process	6	98	296	29901	6.18471	0.00044	0.00406615	ESPL1//MKI67//REC8//TEX15//FANCD2//SGOL1
GO:0051247	positive regulation of protein metabolic process	Biological process	6	99	296	29901	6.12224	0.00046	0.0042345	KRT17//HSPA5//CD44//IL11//TNF//FCER1A
GO:0010627	regulation of protein kinase cascade	Biological process	7	138	296	29901	5.12405	0.00047	0.00427682	FCER1A//IL1B//TNF//IL1RL1//IL11//DUSP22//CD44
GO:0042089	cytokine biosynthetic process	Biological process	5	65	296	29901	7.77053	0.00047	0.00427682	FCGR3//CD276//IL1B//FCER1A//EREG
GO:0043067	regulation of programmed cell death	Biological process	14	496	296	29901	2.85128	0.00047	0.00427682	FCGR3//MYC//ALOX12//SPP1//TNF//EAF2//JAG2//TCF7//MYC//RTN4//BMP7//ALDH1A3//BMI1//CD44//PLCG2//NR4A2
GO:0050768	negative regulation of neurogenesis	Biological process	4	37	296	29901	10.9207	0.00048	0.00431019	RTN4//SEMA3F//BMP7//MT3
GO:0050770	regulation of axonogenesis	Biological process	4	37	296	29901	10.9207	0.00048	0.00431019	RTN4//TNFRSF12A//SEMA3F//PLXNB1
GO:0051261	protein depolymerization	Biological process	4	37	296	29901	10.9207	0.00048	0.00431019	EVL//STMN1//PLEK//AVIL
GO:0016053	organic acid biosynthetic process	Biological process	7	139	296	29901	5.08718	0.00049	0.00431019	PTGS2//PYCR1//PSAT1//FASN//FAAH//ALOX12//FCER1A
GO:0046394	carboxylic acid biosynthetic process	Biological process	7	139	296	29901	5.08718	0.00049	0.00431019	PTGS2//PYCR1//PSAT1//FASN//FAAH//ALOX12//FCER1A
GO:0030516	regulation of axon extension	Biological process	3	16	296	29901	18.9407	0.00049	0.00431019	RTN4//TNFRSF12A//SEMA3F
GO:0033598	mammary gland epithelial cell proliferation	Biological process	3	16	296	29901	18.9407	0.00049	0.00431019	AREG//WNT5A//CCND1
GO:0048048	embryonic eye morphogenesis	Biological process	3	16	296	29901	18.9407	0.00049	0.00431019	ALDH1A3//PROX1//BMP7
GO:0060572	morphogenesis of an epithelial bud	Biological process	3	16	296	29901	18.9407	0.00049	0.00431019	RDH10//BMP7//WNT5A
GO:0042107	cytokine metabolic process	Biological process	5	66	296	29901	7.65279	0.0005	0.00436581	FCGR3//CD276//IL1B//FCER1A//EREG
GO:0048585	negative regulation of response to stimulus	Biological process	5	66	296	29901	7.65279	0.0005	0.00436581	GPX2//CD44//SOCS3//IL1B//CD276
GO:0010941	regulation of cell death	Biological process	14	500	296	29901	2.82847	0.00051	0.00443681	FCGR3//MYC//ALOX12//SPP1//TNF//EAF2//JAG2//TCF7//MYC//RTN4//BMP7//ALDH1A3//BMI1//CD44//PLCG2//NR4A2
GO:0021700	developmental maturation	Biological process	6	101	296	29901	6.001	0.00052	0.0045073	REC8//AGPAT6//NR4A2//PTGS2//BHLHA15//SOX21
GO:0046328	regulation of JNK cascade	Biological process	4	38	296	29901	10.6334	0.00053	0.00457727	FCER1A//DUSP22//IL1B//TNF
GO:0010721	negative regulation of cell development	Biological process	4	39	296	29901	10.3607	0.00059	0.0050224	RTN4//SEMA3F//BMP7//MT3
GO:0070302	regulation of stress-activated protein kinase signaling pathway	Biological process	4	39	296	29901	10.3607	0.00059	0.0050224	FCER1A//DUSP22//IL1B//TNF
GO:0007129	synapsis	Biological process	3	17	296	29901	17.8265	0.00059	0.0050224	TEX15//FANCD2//REC8
GO:0070192	chromosome organization involved in meiosis	Biological process	3	17	296	29901	17.8265	0.00059	0.0050224	TEX15//FANCD2//REC8
GO:0007398	ectoderm development	Biological process	7	144	296	29901	4.91054	0.0006	0.00508929	TNFRSF19//PTGS2//SFN//KRT17//SLC27A4//ASPRV1//KRT36
GO:0050776	regulation of immune response	Biological process	8	189	296	29901	4.27585	0.00062	0.00524021	FCGR3//FCER1A//GPX2//EREG//H2-EA//PLCG2//LAT2//TNF//LBP//CD276
GO:0060443	mammary gland morphogenesis	Biological process	4	40	296	29901	10.1017	0.00065	0.00547429	AREG//WNT5A//ETV5//ROBO1
GO:0045859	regulation of protein kinase activity	Biological process	7	148	296	29901	4.77783	0.00071	0.00591667	SFN//FCER1A//DUSP4//EREG//HSPA5//IL1B//CENPE
GO:0070887	cellular response to chemical stimulus	Biological process	7	148	296	29901	4.77783	0.00071	0.00591667	LBP//HSPA5//FCGR3//IL1B//S100A9//CCND1//LPIN1//SOCS3
GO:0051707	response to other organism	Biological process	9	241	296	29901	3.77242	0.00071	0.00591667	LBP//TNF//PGLYRP1//DEFA20//HCK//GPX2//CITED1//IL1B//IRG1//PLCG2
GO:0051726	regulation of cell cycle	Biological process	7	150	296	29901	4.71412	0.00077	0.00639423	SFN//CENPE//DBF4//CDK1//PROX1//EREG//CCND1
GO:0032496	response to lipopolysaccharide	Biological process	4	42	296	29901	9.62066	0.00078	0.0064547	CITED1//IL1B//IRG1//LBP//PLCG2
GO:0007243	protein kinase cascade	Biological process	10	297	296	29901	3.40124	0.00081	0.00667969	FCER1A//DUSP4//TNF//WNT5A//IL1B//IL1RL1//IL11//DUSP22//CD44//PLEK
GO:0016055	Wnt receptor signaling pathway	Biological process	7	152	296	29901	4.65209	0.00083	0.00677405	WNT5A//CCND1//SOX17//WIF1//LRP5//TCF7//NKD1
GO:0002437	inflammatory response to antigenic stimulus	Biological process	3	19	296	29901	15.95	0.00083	0.00677405	FCGR3//FCER1A//GPX2
GO:0002861	regulation of inflammatory response to antigenic stimulus	Biological process	3	19	296	29901	15.95	0.00083	0.00677405	FCGR3//FCER1A//GPX2
GO:0043549	regulation of kinase activity	Biological process	7	153	296	29901	4.62169	0.00086	0.00699486	SFN//FCER1A//DUSP4//EREG//HSPA5//IL1B//CENPE
GO:0006066	alcohol metabolic process	Biological process	11	354	296	29901	3.13894	0.00088	0.00713311	PCDH12//TNF//PGM2L1//GDPD5//BPGM//SPP1//HMGCS2//APOB48R//PMM1//PLCG2//NR4A2
GO:0009725	response to hormone stimulus	Biological process	6	113	296	29901	5.36373	0.00093	0.00751276	AREG//CITED1//LPIN1//SOCS3//IL1B//ACSBG1
GO:0001570	vasculogenesis	Biological process	4	44	296	29901	9.18335	0.00094	0.0075678	CITED1//FOXM1//SOX17//T
GO:0048469	cell maturation	Biological process	5	76	296	29901	6.64585	0.00096	0.00765101	REC8//AGPAT6//NR4A2//BHLHA15//SOX21
GO:0051789	response to protein stimulus	Biological process	5	76	296	29901	6.64585	0.00096	0.00765101	HSPA5//CCND1//BOC//ID3//CYR61//NR4A2
GO:0051338	regulation of transferase activity	Biological process	7	156	296	29901	4.53281	0.00096	0.00765101	SFN//FCER1A//DUSP4//EREG//HSPA5//IL1B//CENPE
GO:0060444	branching involved in mammary gland duct morphogenesis	Biological process	3	20	296	29901	15.1525	0.00097	0.00770485	AREG//WNT5A//ETV5
GO:0010975	regulation of neuron projection development	Biological process	4	45	296	29901	8.97928	0.00102	0.00804817	RTN4//TNFRSF12A//SEMA3F//PLXNB1
GO:0050900	leukocyte migration	Biological process	4	45	296	29901	8.97928	0.00102	0.00804817	LBP//FCGR3//IL1B//S100A9//TNF
GO:0001501	skeletal system development	Biological process	10	307	296	29901	3.29045	0.00105	0.00825745	BMP7//SPP1//MMP13//PTGS2//CD276//CITED1//RDH10//BMI1//MYC//WNT5A//GJA5//JAG2
GO:0010740	positive regulation of protein kinase cascade	Biological process	5	78	296	29901	6.47544	0.00108	0.0084375	IL1B//TNF//IL11//DUSP22//CD44
GO:0034645	cellular macromolecule biosynthetic process	Biological process	44	2756	296	29901	1.61275	0.00108	0.0084375	DBF4//BMI1//ID3//RHOX5//TGIF1//TNF//NR2C1//CAMTA1//EAF2//ARNTL//ELK3//ETV6//FOXM1//LPIN1//MXD3//MEF2B//BHLHA15//MYC//NFIL3//NPAS2//NR4A2//PROX1//ZFP184//SOX21//SOX17//T//TCF7//TEAD2//USP22//CDCA7L//SOX21//SP6//ETV5//REM2//ELK3//WDR77//RARS//IL1B//KRT17//PSRC1//PHLDA1//CITED1//EREG//BMP7//IL11//TOP2A//YAP1
GO:0045765	regulation of angiogenesis	Biological process	4	46	296	29901	8.78408	0.00111	0.00864344	ANG2//THBS1//IL1B//CCL24
GO:0045787	positive regulation of cell cycle	Biological process	3	21	296	29901	14.431	0.00112	0.0086645	EREG//CENPE//PROX1
GO:0070507	regulation of microtubule cytoskeleton organization	Biological process	3	21	296	29901	14.431	0.00112	0.0086645	STMN1//PSRC1//CENPE
GO:0032271	regulation of protein polymerization	Biological process	4	47	296	29901	8.59718	0.0012	0.00925325	EVL//STMN1//PSRC1//AVIL
GO:0007548	sex differentiation	Biological process	6	120	296	29901	5.05084	0.00127	0.00976133	RDH10//WNT5A//TESC//TCF7//TEX15//AREG
GO:0030182	neuron differentiation	Biological process	12	429	296	29901	2.82565	0.00128	0.00980645	STMN1//BOC//BMP7//EVL//ROBO1//JAG2//NR4A2//RTN4//TGIF1//TNFRSF12A//SEMA3F//PLXNB1
GO:0042981	regulation of apoptosis	Biological process	13	489	296	29901	2.68552	0.00129	0.00985129	FCGR3//MYC//ALOX12//SPP1//TNF//EAF2//RTN4//BMP7//ALDH1A3//BMI1//CD44//NR4A2//JAG2//TCF7//MYC
GO:0001817	regulation of cytokine production	Biological process	6	121	296	29901	5.0091	0.00133	0.0100919	EREG//IL1B//TNF//LBP//FCGR3//CD276//FCER1A
GO:0048666	neuron development	Biological process	10	317	296	29901	3.18665	0.00133	0.0100919	STMN1//BOC//BMP7//EVL//ROBO1//NR4A2//RTN4//TNFRSF12A//SEMA3F//PLXNB1
GO:0010769	regulation of cell morphogenesis involved in differentiation	Biological process	4	49	296	29901	8.24628	0.0014	0.0105892	RTN4//TNFRSF12A//SEMA3F//PLXNB1
GO:0001890	placenta development	Biological process	5	83	296	29901	6.08535	0.00142	0.0107063	SOCS3//CYR61//CITED1//PCDH12//CCNF
GO:0030042	actin filament depolymerization	Biological process	3	23	296	29901	13.1761	0.00147	0.0109788	EVL//PLEK//AVIL
GO:0030834	regulation of actin filament depolymerization	Biological process	3	23	296	29901	13.1761	0.00147	0.0109788	EVL//PLEK//AVIL
GO:0060571	morphogenesis of an epithelial fold	Biological process	3	23	296	29901	13.1761	0.00147	0.0109788	RDH10//BMP7//WNT5A
GO:0030216	keratinocyte differentiation	Biological process	4	50	296	29901	8.08135	0.00151	0.0112422	KRT17//KRT36//PTGS2//SFN
GO:0043687	post-translational protein modification	Biological process	21	1032	296	29901	2.05558	0.00158	0.0116537	FCER1A//SOCS3//TNF//UBE2C//ADAM10//BUB1B//CCND1//CDK1//HCK//WNT5A//DYRK3//CCNB1//NUAK1//DUSP22//DUSP4//BMI1//USP22//HSPA5//USP18//CD44//IL11
GO:0031589	cell-substrate adhesion	Biological process	5	85	296	29901	5.94217	0.00158	0.0116537	TNFRSF12A//LYPD3//CYR61//SPP1//THBS1//JUB
GO:0001655	urogenital system development	Biological process	7	170	296	29901	4.15952	0.00158	0.0116537	RDH10//BMP7//CD44//CITED1//MYC//WNT5A//WDR77//EAF2
GO:0002237	response to molecule of bacterial origin	Biological process	4	51	296	29901	7.92289	0.00163	0.011875	CITED1//IL1B//IRG1//LBP//PLCG2
GO:0043241	protein complex disassembly	Biological process	4	51	296	29901	7.92289	0.00163	0.011875	EVL//STMN1//PLEK//AVIL
GO:0043624	cellular protein complex disassembly	Biological process	4	51	296	29901	7.92289	0.00163	0.011875	EVL//STMN1//PLEK//AVIL
GO:0045927	positive regulation of growth	Biological process	4	51	296	29901	7.92289	0.00163	0.011875	KRT17//SFN//TNFRSF12A//PROX1
GO:0000226	microtubule cytoskeleton organization	Biological process	5	86	296	29901	5.87308	0.00166	0.0120555	ESPL1//PSRC1//STMN1//KIF11//CENPE
GO:0045995	regulation of embryonic development	Biological process	3	24	296	29901	12.6271	0.00167	0.0120555	HSPA5//BMP7//WNT5A
GO:0048675	axon extension	Biological process	3	24	296	29901	12.6271	0.00167	0.0120555	RTN4//TNFRSF12A//SEMA3F
GO:0071310	cellular response to organic substance	Biological process	5	87	296	29901	5.80557	0.00175	0.0125188	HSPA5//CCND1//LPIN1//SOCS3//IL1B
GO:0032984	macromolecular complex disassembly	Biological process	4	52	296	29901	7.77053	0.00175	0.0125188	EVL//STMN1//PLEK//AVIL
GO:0034623	cellular macromolecular complex disassembly	Biological process	4	52	296	29901	7.77053	0.00175	0.0125188	EVL//STMN1//PLEK//AVIL
GO:0023052	signaling	Biological process	56	3836	296	29901	1.4747	0.00178	0.0126952	ELK3//FCER1A//DUSP4//FCGR3//LRP5//TCF7//WNT5A//WIF1//NKD1//ANG2//ARNTL//REM2//IL1RL1//NPAS2//ID3//TNFRSF11B//PLCG2//PLXNB1//ODZ4//RACGAP1//FRMPD1//NIACR1//EREG//HSPA5//CDK1//GJA5//JAG2//SH3PXD2B//HBEGF//DUSP22//BAMBI//BHLHA15//APLN//ADAM10//WDR12//BOC//ADAM8//SOCS3//ECT2//STMN1//PLEK//TNF//ARL4C//CDC42EP1//CCND1//SOX17//BMP7//HTRA1//NR4A2//IL1B//IL11//CD44//PLAT//ALDH1A3//TGIF1//LAT2//T
GO:0006633	fatty acid biosynthetic process	Biological process	5	88	296	29901	5.7396	0.00184	0.0130448	PTGS2//ALOX12//FCER1A//FASN//FAAH
GO:0021915	neural tube development	Biological process	5	88	296	29901	5.7396	0.00184	0.0130448	T//TGIF1//VANGL2//BMI1//TCF7
GO:0015844	monoamine transport	Biological process	3	25	296	29901	12.122	0.00188	0.0131711	FCER1A//FCGR3//CADPS
GO:0046456	icosanoid biosynthetic process	Biological process	3	25	296	29901	12.122	0.00188	0.0131711	PTGS2//ALOX12//FCER1A
GO:0045926	negative regulation of growth	Biological process	4	53	296	29901	7.62392	0.00188	0.0131711	EAF2//PSRC1//RTN4//SEMA3F
GO:0050727	regulation of inflammatory response	Biological process	4	53	296	29901	7.62392	0.00188	0.0131711	FCGR3//FCER1A//GPX2//CD276//LBP
GO:0045596	negative regulation of cell differentiation	Biological process	7	176	296	29901	4.01772	0.00193	0.0134816	RTN4//CCND1//PLA2G2A//CITED1//SEMA3F//BMP7//MT3
GO:0032956	regulation of actin cytoskeleton organization	Biological process	4	54	296	29901	7.48273	0.00202	0.0140689	EVL//PLEK//AVIL//PROX1
GO:0031347	regulation of defense response	Biological process	5	90	296	29901	5.61205	0.00203	0.0140972	FCGR3//FCER1A//GPX2//EREG//CD276//LBP
GO:0030036	actin cytoskeleton organization	Biological process	7	178	296	29901	3.97257	0.00205	0.0141946	EVL//AVIL//PROX1//PLEK//LPIN1//S100A9//CTTNBP2
GO:0006636	unsaturated fatty acid biosynthetic process	Biological process	3	26	296	29901	11.6558	0.00211	0.0144416	PTGS2//ALOX12//FCER1A
GO:0031333	negative regulation of protein complex assembly	Biological process	3	26	296	29901	11.6558	0.00211	0.0144416	EVL//STMN1//AVIL
GO:0032272	negative regulation of protein polymerization	Biological process	3	26	296	29901	11.6558	0.00211	0.0144416	EVL//STMN1//AVIL
GO:0048588	developmental cell growth	Biological process	3	26	296	29901	11.6558	0.00211	0.0144416	RTN4//TNFRSF12A//SEMA3F
GO:0010639	negative regulation of organelle organization	Biological process	4	55	296	29901	7.34668	0.00216	0.0146571	EVL//CENPE//STMN1//AVIL
GO:0031344	regulation of cell projection organization	Biological process	4	55	296	29901	7.34668	0.00216	0.0146571	RTN4//TNFRSF12A//SEMA3F//PLXNB1
GO:0032970	regulation of actin filament-based process	Biological process	4	55	296	29901	7.34668	0.00216	0.0146571	EVL//PLEK//AVIL//PROX1
GO:0009913	epidermal cell differentiation	Biological process	4	56	296	29901	7.21549	0.00231	0.0156303	PTGS2//SFN//KRT17//KRT36
GO:0045664	regulation of neuron differentiation	Biological process	5	93	296	29901	5.43102	0.00235	0.0157444	RTN4//TGIF1//TNFRSF12A//SEMA3F//PLXNB1
GO:0030595	leukocyte chemotaxis	Biological process	3	27	296	29901	11.2241	0.00236	0.0157444	LBP//FCGR3//IL1B//S100A9
GO:0043122	regulation of I-kappaB kinase/NF-kappaB cascade	Biological process	3	27	296	29901	11.2241	0.00236	0.0157444	IL1B//TNF//IL1RL1
GO:0060326	cell chemotaxis	Biological process	3	27	296	29901	11.2241	0.00236	0.0157444	LBP//FCGR3//IL1B//S100A9
GO:0090101	negative regulation of transmembrane receptor protein serine/threonine kinase signaling pathway	Biological process	3	27	296	29901	11.2241	0.00236	0.0157444	HSPA5//HTRA1//WNT5A
GO:0007219	Notch signaling pathway	Biological process	4	57	296	29901	7.0889	0.00246	0.0162292	ADAM10//BMP7//JAG2//WDR12
GO:0010562	positive regulation of phosphorus metabolic process	Biological process	4	57	296	29901	7.0889	0.00246	0.0162292	CD44//IL11//EREG//FCER1A
GO:0042327	positive regulation of phosphorylation	Biological process	4	57	296	29901	7.0889	0.00246	0.0162292	CD44//IL11//FCER1A//EREG
GO:0045937	positive regulation of phosphate metabolic process	Biological process	4	57	296	29901	7.0889	0.00246	0.0162292	CD44//IL11//EREG//FCER1A
GO:0022604	regulation of cell morphogenesis	Biological process	5	95	296	29901	5.31668	0.00258	0.0169737	CDC42EP1//RTN4//TNFRSF12A//SEMA3F//PLXNB1
GO:0030178	negative regulation of Wnt receptor signaling pathway	Biological process	3	28	296	29901	10.8232	0.00262	0.01716	CCND1//SOX17//WIF1
GO:0007155	cell adhesion	Biological process	14	595	296	29901	2.37687	0.00263	0.01716	TNFRSF12A//PCDH12//LYPD3//CYR61//SPP1//THBS1//ADAM8//BOC//JAG2//JUB//PLEK//SPON2//CD44//LAMC2//AMICA1
GO:0022610	biological adhesion	Biological process	14	595	296	29901	2.37687	0.00263	0.01716	SPON2//BOC//CD44//CYR61//JUB//LAMC2//SPP1//THBS1//AMICA1//TNFRSF12A//PCDH12//LYPD3//ADAM8//JAG2//PLEK
GO:0009056	catabolic process	Biological process	20	1006	296	29901	2.00829	0.00264	0.0171781	SOCS3//CDCA3//USP22//USP18//PMEPA1//UBE2C//BPGM//MYC//SP6//LBP//PGLYRP1//PLCG2//ASPG//PLA2G2A//PLA2G7//PLA2G12A//IRG1//ARNTL//SLC27A4//SMOX//IL1B
GO:0051704	multi-organism process	Biological process	10	350	296	29901	2.8862	0.00273	0.0177152	LBP//TNF//PGLYRP1//DEFA20//HCK//GPX2//CITED1//IL1B//IRG1//PLCG2//SLC20A2
GO:0007179	transforming growth factor beta receptor signaling pathway	Biological process	4	59	296	29901	6.8486	0.00279	0.0180061	HSPA5//HTRA1//DUSP22//BAMBI
GO:0032868	response to insulin stimulus	Biological process	4	59	296	29901	6.8486	0.00279	0.0180061	LPIN1//SOCS3//IL1B//CITED1
GO:0032101	regulation of response to external stimulus	Biological process	5	97	296	29901	5.20706	0.00282	0.0181504	FCGR3//FCER1A//GPX2//PLEK//CD276//LBP
GO:0030282	bone mineralization	Biological process	3	29	296	29901	10.45	0.0029	0.0185647	CD276//MMP13//PTGS2
GO:0048547	gut morphogenesis	Biological process	3	29	296	29901	10.45	0.0029	0.0185647	WNT5A//TCF7//SOX21
GO:0051649	establishment of localization in cell	Biological process	14	603	296	29901	2.34533	0.00297	0.0189617	ARNTL//FCER1A//FCGR3//KPNA2//IPO7//BHLHA15//STX11//CADPS//PLEK//ADAM10//EVL//LAT2//IL11//TNF//IL1B
GO:0030029	actin filament-based process	Biological process	7	191	296	29901	3.70219	0.00305	0.0194202	EVL//CTTNBP2//AVIL//PROX1//PLEK//LPIN1//S100A9
GO:0051270	regulation of cellular component movement	Biological process	5	99	296	29901	5.10186	0.00308	0.0195588	JUB//RTN4//SEMA3F//STMN1//HBEGF
GO:0001892	embryonic placenta development	Biological process	4	61	296	29901	6.62406	0.00315	0.0198969	SOCS3//CYR61//CITED1//PCDH12
GO:0050678	regulation of epithelial cell proliferation	Biological process	4	61	296	29901	6.62406	0.00315	0.0198969	PLA2G2A//WNT5A//EAF2//WDR77
GO:0006690	icosanoid metabolic process	Biological process	3	30	296	29901	10.1017	0.0032	0.02	PTGS2//ALOX12//FCER1A
GO:0032675	regulation of interleukin-6 production	Biological process	3	30	296	29901	10.1017	0.0032	0.02	IL1B//TNF//EREG
GO:0032886	regulation of microtubule-based process	Biological process	3	30	296	29901	10.1017	0.0032	0.02	STMN1//PSRC1//CENPE
GO:0060740	prostate gland epithelium morphogenesis	Biological process	3	30	296	29901	10.1017	0.0032	0.02	CD44//BMP7//WNT5A
GO:0007411	axon guidance	Biological process	5	100	296	29901	5.05084	0.00322	0.0200722	ROBO1//SEMA3F//BOC//BMP7//EVL
GO:0033554	cellular response to stress	Biological process	11	419	296	29901	2.65199	0.00327	0.0203305	FANCD2//HSPA5//CDK1//TNF//WNT5A//FCER1A//TEX15//CCND1//CD44//DUSP22//IL1B
GO:0030198	extracellular matrix organization	Biological process	5	101	296	29901	5.00084	0.00336	0.0208355	CYR61//TNFRSF11B//TNF//NOX1//GFOD2
GO:0032635	interleukin-6 production	Biological process	3	31	296	29901	9.77583	0.00352	0.0216076	IL1B//TNF//EREG
GO:0033559	unsaturated fatty acid metabolic process	Biological process	3	31	296	29901	9.77583	0.00352	0.0216076	PTGS2//ALOX12//FCER1A
GO:0060512	prostate gland morphogenesis	Biological process	3	31	296	29901	9.77583	0.00352	0.0216076	CD44//BMP7//WNT5A
GO:0006644	phospholipid metabolic process	Biological process	6	147	296	29901	4.12314	0.00353	0.0216076	SPP1//AGPAT6//PLCG2//PITPNC1//PLA2G2A//PLA2G12A
GO:0031399	regulation of protein modification process	Biological process	6	147	296	29901	4.12314	0.00353	0.0216076	SOCS3//TNF//FCER1A//HSPA5//CD44//IL11
GO:0007346	regulation of mitotic cell cycle	Biological process	4	63	296	29901	6.41377	0.00354	0.0216131	CENPE//DBF4//CDK1//EREG
GO:0002682	regulation of immune system process	Biological process	9	307	296	29901	2.96141	0.00371	0.0225929	FCGR3//FCER1A//GPX2//BMI1//CD276//EREG//TNF//H2-EA//PLCG2//LAT2//LBP
GO:0001816	cytokine production	Biological process	6	149	296	29901	4.06779	0.00377	0.0228996	EREG//IL1B//LBP//TNF//FCGR3//CD276//FCER1A
GO:0001666	response to hypoxia	Biological process	3	32	296	29901	9.47033	0.00385	0.0232665	NR4A2//PLAT//PLAU
GO:0043588	skin development	Biological process	3	32	296	29901	9.47033	0.00385	0.0232665	SLC27A4//SFN//ASPRV1
GO:0022411	cellular component disassembly	Biological process	4	65	296	29901	6.21642	0.00397	0.0239308	EVL//MYC//STMN1//PLEK//AVIL
GO:0033036	macromolecule localization	Biological process	18	902	296	29901	2.01586	0.00409	0.0245918	ARNTL//SLC27A4//KPNA2//IPO7//KDELR1//LBP//APOB48R//PITPNC1//STX11//CENPE//MSR1//CADPS//SLC15A3//TMEM48//TEX15//RSL1D1//VANGL2//TNF//PLEK
GO:0002866	positive regulation of acute inflammatory response to antigenic stimulus	Biological process	2	10	296	29901	20.2034	0.00417	0.0246976	FCGR3//FCER1A
GO:0002885	positive regulation of hypersensitivity	Biological process	2	10	296	29901	20.2034	0.00417	0.0246976	FCGR3//FCER1A
GO:0043584	nose development	Biological process	2	10	296	29901	20.2034	0.00417	0.0246976	ALDH1A3//RDH10
GO:0048640	negative regulation of developmental growth	Biological process	2	10	296	29901	20.2034	0.00417	0.0246976	RTN4//SEMA3F
GO:0060601	lateral sprouting from an epithelium	Biological process	2	10	296	29901	20.2034	0.00417	0.0246976	WNT5A//BMP7
GO:0060768	regulation of epithelial cell proliferation involved in prostate gland development	Biological process	2	10	296	29901	20.2034	0.00417	0.0246976	EAF2//WDR77
GO:0070482	response to oxygen levels	Biological process	3	33	296	29901	9.18335	0.00421	0.0248725	NR4A2//PLAT//PLAU
GO:0032880	regulation of protein localization	Biological process	4	68	296	29901	5.94217	0.00466	0.0274628	TNF//CENPE//TEX15//RSL1D1
GO:0065009	regulation of molecular function	Biological process	11	440	296	29901	2.52542	0.00471	0.0276887	SFN//FCER1A//DUSP4//EREG//MYC//HSPA5//PLCG2//NR4A2//JUB//IL1B//CENPE//TNF
GO:0050731	positive regulation of peptidyl-tyrosine phosphorylation	Biological process	3	35	296	29901	8.65859	0.00497	0.0290981	CD44//FCER1A//IL11
GO:0002675	positive regulation of acute inflammatory response	Biological process	2	11	296	29901	18.3667	0.00506	0.0290981	FCGR3//FCER1A//LBP
GO:0045132	meiotic chromosome segregation	Biological process	2	11	296	29901	18.3667	0.00506	0.0290981	ESPL1//SGOL1
GO:0045136	development of secondary sexual characteristics	Biological process	2	11	296	29901	18.3667	0.00506	0.0290981	AREG//WNT5A
GO:0045408	regulation of interleukin-6 biosynthetic process	Biological process	2	11	296	29901	18.3667	0.00506	0.0290981	EREG//IL1B
GO:0045727	positive regulation of translation	Biological process	2	11	296	29901	18.3667	0.00506	0.0290981	TNF//KRT17
GO:0048384	retinoic acid receptor signaling pathway	Biological process	2	11	296	29901	18.3667	0.00506	0.0290981	ALDH1A3//TGIF1
GO:0048639	positive regulation of developmental growth	Biological process	2	11	296	29901	18.3667	0.00506	0.0290981	TNFRSF12A//PROX1
GO:0060767	epithelial cell proliferation involved in prostate gland development	Biological process	2	11	296	29901	18.3667	0.00506	0.0290981	EAF2//WDR77
GO:0019637	organophosphate metabolic process	Biological process	6	159	296	29901	3.81196	0.00517	0.0295873	PLA2G2A//PLA2G12A//SPP1//AGPAT6//PLCG2//PITPNC1
GO:0031401	positive regulation of protein modification process	Biological process	4	70	296	29901	5.77239	0.00517	0.0295873	HSPA5//CD44//IL11//FCER1A
GO:0042060	wound healing	Biological process	5	112	296	29901	4.50968	0.00521	0.0297446	CD44//PLEK//EVL//HBEGF//JUB//ELK3
GO:0048562	embryonic organ morphogenesis	Biological process	6	160	296	29901	3.78813	0.00533	0.0303567	ALDH1A3//TCF7//MYC//PROX1//BMP7//RDH10//BMI1
GO:0051246	regulation of protein metabolic process	Biological process	9	325	296	29901	2.79739	0.00536	0.0304545	SOCS3//TNF//FCER1A//KRT17//HSPA5//CD44//IL11//ARNTL//UBE2C
GO:0043244	regulation of protein complex disassembly	Biological process	3	36	296	29901	8.41807	0.00539	0.0304792	EVL//PLEK//AVIL
GO:0048645	organ formation	Biological process	3	36	296	29901	8.41807	0.00539	0.0304792	RDH10//BMP7//WNT5A
GO:0032504	multicellular organism reproduction	Biological process	10	387	296	29901	2.61026	0.00551	0.0310101	REC8//FANCD2//TEX15//JAG2//S100A11//RACGAP1//NKD1//AGPAT6//CCND1//RHOX5
GO:0048609	reproductive process in a multicellular organism	Biological process	10	387	296	29901	2.61026	0.00551	0.0310101	REC8//FANCD2//TEX15//JAG2//S100A11//RACGAP1//NKD1//AGPAT6//CCND1//RHOX5
GO:0044085	cellular component biogenesis	Biological process	13	582	296	29901	2.25639	0.00567	0.0318351	WDR12//GAR1//GEMIN6//H1F0//EVL//TEX15//JUB//PROX1//STMN1//PSRC1//PLEK//VANGL2//AVIL
GO:0048546	digestive tract morphogenesis	Biological process	3	37	296	29901	8.19056	0.00582	0.0326002	WNT5A//SOX21//TCF7
GO:0007610	behavior	Biological process	10	392	296	29901	2.57696	0.00602	0.0334382	LBP//CYR61//ROBO1//S100A9//CCL7//CCL24//NR4A2//FCGR3//IL1B//NPAS2//SEMA3F
GO:0001932	regulation of protein amino acid phosphorylation	Biological process	5	116	296	29901	4.35418	0.00604	0.0334382	FCER1A//CD44//IL11//SOCS3//TNF
GO:0002065	columnar/cuboidal epithelial cell differentiation	Biological process	2	12	296	29901	16.8361	0.00604	0.0334382	AGPAT6//WDR77
GO:0002863	positive regulation of inflammatory response to antigenic stimulus	Biological process	2	12	296	29901	16.8361	0.00604	0.0334382	FCGR3//FCER1A
GO:0042226	interleukin-6 biosynthetic process	Biological process	2	12	296	29901	16.8361	0.00604	0.0334382	EREG//IL1B
GO:0007169	transmembrane receptor protein tyrosine kinase signaling pathway	Biological process	7	221	296	29901	3.19963	0.0067	0.0370058	EREG//HBEGF//WNT5A//SOCS3//IL1B//PLAT//ANG2
GO:0002438	acute inflammatory response to antigenic stimulus	Biological process	2	13	296	29901	15.5411	0.00709	0.0385326	FCGR3//FCER1A
GO:0002524	hypersensitivity	Biological process	2	13	296	29901	15.5411	0.00709	0.0385326	FCGR3//FCER1A
GO:0002864	regulation of acute inflammatory response to antigenic stimulus	Biological process	2	13	296	29901	15.5411	0.00709	0.0385326	FCGR3//FCER1A
GO:0002883	regulation of hypersensitivity	Biological process	2	13	296	29901	15.5411	0.00709	0.0385326	FCGR3//FCER1A
GO:0010827	regulation of glucose transport	Biological process	2	13	296	29901	15.5411	0.00709	0.0385326	IL1B//TNF
GO:0033135	regulation of peptidyl-serine phosphorylation	Biological process	2	13	296	29901	15.5411	0.00709	0.0385326	CD44//IL11
GO:0090068	positive regulation of cell cycle process	Biological process	2	13	296	29901	15.5411	0.00709	0.0385326	EREG//CENPE
GO:0009116	nucleoside metabolic process	Biological process	3	40	296	29901	7.57627	0.00724	0.0390795	NME4//DCAKD//MTAP
GO:0030111	regulation of Wnt receptor signaling pathway	Biological process	3	40	296	29901	7.57627	0.00724	0.0390795	CCND1//SOX17//WIF1
GO:0055123	digestive system development	Biological process	3	40	296	29901	7.57627	0.00724	0.0390795	WNT5A//SOX21//TCF7
GO:0051258	protein polymerization	Biological process	4	78	296	29901	5.18035	0.00756	0.0407143	EVL//STMN1//PSRC1//AVIL
GO:0001843	neural tube closure	Biological process	3	41	296	29901	7.39148	0.00775	0.0415491	T//TGIF1//VANGL2
GO:0060606	tube closure	Biological process	3	41	296	29901	7.39148	0.00775	0.0415491	T//TGIF1//VANGL2
GO:0043434	response to peptide hormone stimulus	Biological process	4	79	296	29901	5.11478	0.00791	0.0423114	CITED1//LPIN1//SOCS3//IL1B
GO:0008610	lipid biosynthetic process	Biological process	8	286	296	29901	2.82565	0.00797	0.0425365	PTGS2//FASN//FAAH//HMGCS2//AKR1C21//AGPAT6//ALOX12//FCER1A
GO:0006468	protein amino acid phosphorylation	Biological process	14	678	296	29901	2.08589	0.00811	0.0428016	FCER1A//SOCS3//TNF//DYRK3//CD44//IL11//ADAM10//BUB1B//CCND1//CDK1//HCK//WNT5A//CCNB1//NUAK1
GO:0001676	long-chain fatty acid metabolic process	Biological process	2	14	296	29901	14.431	0.00822	0.0428016	SLC27A4//ACSBG1
GO:0002714	positive regulation of B cell mediated immunity	Biological process	2	14	296	29901	14.431	0.00822	0.0428016	FCGR3//FCER1A
GO:0002886	regulation of myeloid leukocyte mediated immunity	Biological process	2	14	296	29901	14.431	0.00822	0.0428016	FCGR3//FCER1A
GO:0002891	positive regulation of immunoglobulin mediated immune response	Biological process	2	14	296	29901	14.431	0.00822	0.0428016	FCGR3//FCER1A
GO:0030512	negative regulation of transforming growth factor beta receptor signaling pathway	Biological process	2	14	296	29901	14.431	0.00822	0.0428016	HSPA5//HTRA1
GO:0030514	negative regulation of BMP signaling pathway	Biological process	2	14	296	29901	14.431	0.00822	0.0428016	WNT5A//HTRA1
GO:0031334	positive regulation of protein complex assembly	Biological process	2	14	296	29901	14.431	0.00822	0.0428016	PSRC1//PLEK
GO:0050772	positive regulation of axonogenesis	Biological process	2	14	296	29901	14.431	0.00822	0.0428016	TNFRSF12A//PLXNB1
GO:0060341	regulation of cellular localization	Biological process	5	125	296	29901	4.04068	0.00822	0.0428016	FCER1A//IL11//TNF//CENPE//IL1B
GO:0006720	isoprenoid metabolic process	Biological process	3	42	296	29901	7.21549	0.00829	0.0428016	ALDH1A3//RDH10//HMGCS2
GO:0030509	BMP signaling pathway	Biological process	3	42	296	29901	7.21549	0.00829	0.0428016	WNT5A//HTRA1//BMP7
GO:0042475	odontogenesis of dentine-containing tooth	Biological process	3	42	296	29901	7.21549	0.00829	0.0428016	TNFRSF11B//BMP7//JAG2
GO:0048565	gut development	Biological process	3	42	296	29901	7.21549	0.00829	0.0428016	WNT5A//SOX21//TCF7
GO:0051494	negative regulation of cytoskeleton organization	Biological process	3	42	296	29901	7.21549	0.00829	0.0428016	EVL//STMN1//AVIL
GO:0060548	negative regulation of cell death	Biological process	7	231	296	29901	3.06112	0.00844	0.0434816	ALOX12//SPP1//MYC//RTN4//BMI1//CD44//PLCG2//NR4A2//BMP7
GO:0001656	metanephros development	Biological process	4	81	296	29901	4.98849	0.00862	0.0443128	BMP7//CD44//CITED1//MYC//RDH10
GO:0022607	cellular component assembly	Biological process	11	483	296	29901	2.30059	0.00919	0.0471409	GEMIN6//H1F0//EVL//TEX15//JUB//PROX1//STMN1//PSRC1//PLEK//VANGL2//AVIL
GO:0018108	peptidyl-tyrosine phosphorylation	Biological process	4	83	296	29901	4.86828	0.00938	0.0472495	CD44//FCER1A//IL11//DYRK3
GO:0018212	peptidyl-tyrosine modification	Biological process	4	83	296	29901	4.86828	0.00938	0.0472495	DYRK3//CD44//FCER1A//IL11
GO:0030968	endoplasmic reticulum unfolded protein response	Biological process	2	15	296	29901	13.4689	0.00942	0.0472495	HSPA5//CCND1
GO:0031110	regulation of microtubule polymerization or depolymerization	Biological process	2	15	296	29901	13.4689	0.00942	0.0472495	STMN1//PSRC1
GO:0034620	cellular response to unfolded protein	Biological process	2	15	296	29901	13.4689	0.00942	0.0472495	HSPA5//CCND1
GO:0045446	endothelial cell differentiation	Biological process	2	15	296	29901	13.4689	0.00942	0.0472495	SOX17//PROX1
GO:0050771	negative regulation of axonogenesis	Biological process	2	15	296	29901	13.4689	0.00942	0.0472495	RTN4//SEMA3F
GO:0050886	endocrine process	Biological process	2	15	296	29901	13.4689	0.00942	0.0472495	NOX1//IL1B
GO:0060442	branching involved in prostate gland morphogenesis	Biological process	2	15	296	29901	13.4689	0.00942	0.0472495	BMP7//CD44
GO:0014020	primary neural tube formation	Biological process	3	44	296	29901	6.88752	0.00943	0.0472495	T//TGIF1//VANGL2
GO:0032869	cellular response to insulin stimulus	Biological process	3	44	296	29901	6.88752	0.00943	0.0472495	SOCS3//IL1B//LPIN1
GO:0006464	protein modification process	Biological process	21	1217	296	29901	1.7431	0.01013	0.05065	FCER1A//SOCS3//TNF//UBE2C//ADAM10//BUB1B//CCND1//CDK1//HCK//WNT5A//DYRK3//CCNB1//NUAK1//DUSP22//DUSP4//BMI1//USP22//HSPA5//USP18//CD44//IL11
GO:0043010	camera-type eye development	Biological process	5	132	296	29901	3.8264	0.01026	0.0511922	ALDH1A3//RDH10//PROX1//BMP7//TGIF1
GO:0008104	protein localization	Biological process	15	770	296	29901	1.96786	0.01033	0.0514334	ARNTL//KPNA2//IPO7//KDELR1//STX11//CENPE//CADPS//SLC15A3//TMEM48//TEX15//RSL1D1//MSR1//VANGL2//TNF//PLEK
GO:0007051	spindle organization	Biological process	2	16	296	29901	12.6271	0.01069	0.052133	ESPL1//STMN1
GO:0007439	ectodermal gut development	Biological process	2	16	296	29901	12.6271	0.01069	0.052133	WNT5A//TCF7
GO:0019370	leukotriene biosynthetic process	Biological process	2	16	296	29901	12.6271	0.01069	0.052133	ALOX12//FCER1A
GO:0030168	platelet activation	Biological process	2	16	296	29901	12.6271	0.01069	0.052133	PLEK//EVL
GO:0042573	retinoic acid metabolic process	Biological process	2	16	296	29901	12.6271	0.01069	0.052133	ALDH1A3//RDH10
GO:0043450	alkene biosynthetic process	Biological process	2	16	296	29901	12.6271	0.01069	0.052133	ALOX12//FCER1A
GO:0045682	regulation of epidermis development	Biological process	2	16	296	29901	12.6271	0.01069	0.052133	KRT36//KRT17
GO:0046888	negative regulation of hormone secretion	Biological process	2	16	296	29901	12.6271	0.01069	0.052133	IL1B//IL11
GO:0048567	ectodermal gut morphogenesis	Biological process	2	16	296	29901	12.6271	0.01069	0.052133	WNT5A//TCF7
GO:0060713	labyrinthine layer morphogenesis	Biological process	2	16	296	29901	12.6271	0.01069	0.052133	SOCS3//CYR61
GO:0001503	ossification	Biological process	5	134	296	29901	3.76929	0.0109	0.0530482	MMP13//PTGS2//CD276//CITED1//BMP7//SPP1
GO:0032940	secretion by cell	Biological process	7	243	296	29901	2.90995	0.01095	0.053074	FCER1A//FCGR3//CADPS//PLEK//LAT2//IL11//TNF//IL1B
GO:0044093	positive regulation of molecular function	Biological process	7	243	296	29901	2.90995	0.01095	0.053074	FCER1A//EREG//MYC//HSPA5//PLCG2//NR4A2//CENPE//TNF
GO:0070647	protein modification by small protein conjugation or removal	Biological process	4	87	296	29901	4.64445	0.01102	0.0533045	UBE2C//BMI1//USP22//HSPA5
GO:0008064	regulation of actin polymerization or depolymerization	Biological process	3	47	296	29901	6.44789	0.01129	0.0543889	EVL//PLEK//AVIL
GO:0031214	biomineral formation	Biological process	3	47	296	29901	6.44789	0.01129	0.0543889	MMP13//PTGS2//CD276//SPP1
GO:0009308	amine metabolic process	Biological process	8	305	296	29901	2.64962	0.01145	0.0550481	RARS//ASPG//PYCR1//PSAT1//SPP1//PGLYRP1//NR4A2//SMOX
GO:0007249	I-kappaB kinase/NF-kappaB cascade	Biological process	3	48	296	29901	6.31356	0.01196	0.0568489	IL1B//TNF//IL1RL1
GO:0030832	regulation of actin filament length	Biological process	3	48	296	29901	6.31356	0.01196	0.0568489	EVL//PLEK//AVIL
GO:0090092	regulation of transmembrane receptor protein serine/threonine kinase signaling pathway	Biological process	3	48	296	29901	6.31356	0.01196	0.0568489	HSPA5//HTRA1//WNT5A
GO:0003158	endothelium development	Biological process	2	17	296	29901	11.8843	0.01204	0.0568489	PROX1//SOX17
GO:0006691	leukotriene metabolic process	Biological process	2	17	296	29901	11.8843	0.01204	0.0568489	ALOX12//FCER1A
GO:0007091	mitotic metaphase/anaphase transition	Biological process	2	17	296	29901	11.8843	0.01204	0.0568489	CENPE//BUB1B
GO:0007093	mitotic cell cycle checkpoint	Biological process	2	17	296	29901	11.8843	0.01204	0.0568489	CENPE//CDK1
GO:0030593	neutrophil chemotaxis	Biological process	2	17	296	29901	11.8843	0.01204	0.0568489	FCGR3//IL1B
GO:0032507	maintenance of protein location in cell	Biological process	2	17	296	29901	11.8843	0.01204	0.0568489	KDELR1//CENPE
GO:0050790	regulation of catalytic activity	Biological process	9	371	296	29901	2.45054	0.01213	0.0571602	SFN//FCER1A//DUSP4//EREG//MYC//HSPA5//NR4A2//JUB//IL1B//CENPE
GO:0050778	positive regulation of immune response	Biological process	5	138	296	29901	3.66003	0.01226	0.0576584	FCGR3//FCER1A//EREG//PLCG2//LAT2//LBP//H2-EA
GO:0051240	positive regulation of multicellular organismal process	Biological process	5	139	296	29901	3.6337	0.01261	0.0591412	EREG//IL1B//CD276//TNF//LBP//KRT17//MYC
GO:0042476	odontogenesis	Biological process	3	49	296	29901	6.18471	0.01265	0.0591412	BMP7//JAG2//TNFRSF11B
GO:0071375	cellular response to peptide hormone stimulus	Biological process	3	49	296	29901	6.18471	0.01265	0.0591412	LPIN1//SOCS3//IL1B
GO:0007015	actin filament organization	Biological process	4	91	296	29901	4.4403	0.01283	0.0598649	EVL//PROX1//PLEK//AVIL
GO:0010564	regulation of cell cycle process	Biological process	3	50	296	29901	6.06101	0.01336	0.061358	CENPE//DBF4//EREG
GO:0002673	regulation of acute inflammatory response	Biological process	2	18	296	29901	11.2241	0.01346	0.061358	FCGR3//FCER1A//LBP
GO:0007173	epidermal growth factor receptor signaling pathway	Biological process	2	18	296	29901	11.2241	0.01346	0.061358	EREG//HBEGF
GO:0031109	microtubule polymerization or depolymerization	Biological process	2	18	296	29901	11.2241	0.01346	0.061358	STMN1//PSRC1
GO:0032755	positive regulation of interleukin-6 production	Biological process	2	18	296	29901	11.2241	0.01346	0.061358	IL1B//TNF
GO:0035050	embryonic heart tube development	Biological process	2	18	296	29901	11.2241	0.01346	0.061358	GJA5//SOX17
GO:0045576	mast cell activation	Biological process	2	18	296	29901	11.2241	0.01346	0.061358	LAT2//FCER1A//FCGR3
GO:0045598	regulation of fat cell differentiation	Biological process	2	18	296	29901	11.2241	0.01346	0.061358	SH3PXD2B//LPIN1
GO:0045766	positive regulation of angiogenesis	Biological process	2	18	296	29901	11.2241	0.01346	0.061358	IL1B//CCL24
GO:0060674	placenta blood vessel development	Biological process	2	18	296	29901	11.2241	0.01346	0.061358	CYR61//SOCS3
GO:0060749	mammary gland alveolus development	Biological process	2	18	296	29901	11.2241	0.01346	0.061358	AREG//CCND1
GO:0071445	cellular response to protein stimulus	Biological process	2	18	296	29901	11.2241	0.01346	0.061358	HSPA5//CCND1
GO:0031349	positive regulation of defense response	Biological process	3	51	296	29901	5.94217	0.01409	0.0639842	FCGR3//FCER1A//EREG//LBP
GO:0048593	camera-type eye morphogenesis	Biological process	3	51	296	29901	5.94217	0.01409	0.0639842	ALDH1A3//PROX1//BMP7
GO:0007276	gamete generation	Biological process	8	319	296	29901	2.53334	0.01466	0.066243	REC8//TEX15//JAG2//S100A11//RACGAP1//NKD1//RHOX5//FANCD2
GO:0015837	amine transport	Biological process	4	95	296	29901	4.25334	0.01483	0.066243	FCER1A//FCGR3//LAT2//CADPS
GO:0030326	embryonic limb morphogenesis	Biological process	4	95	296	29901	4.25334	0.01483	0.066243	RDH10//LRP5//GJA5//WNT5A
GO:0035113	embryonic appendage morphogenesis	Biological process	4	95	296	29901	4.25334	0.01483	0.066243	GJA5//WNT5A//RDH10//LRP5
GO:0044242	cellular lipid catabolic process	Biological process	3	52	296	29901	5.8279	0.01485	0.066243	LBP//PLCG2//SLC27A4
GO:0050730	regulation of peptidyl-tyrosine phosphorylation	Biological process	3	52	296	29901	5.8279	0.01485	0.066243	CD44//FCER1A//IL11
GO:0051051	negative regulation of transport	Biological process	3	52	296	29901	5.8279	0.01485	0.066243	IL1B//TNF//IL11
GO:0001659	temperature homeostasis	Biological process	2	19	296	29901	10.6334	0.01495	0.066243	IL1B//GPX2
GO:0016525	negative regulation of angiogenesis	Biological process	2	19	296	29901	10.6334	0.01495	0.066243	ANG2//THBS1
GO:0031345	negative regulation of cell projection organization	Biological process	2	19	296	29901	10.6334	0.01495	0.066243	RTN4//SEMA3F
GO:0043407	negative regulation of MAP kinase activity	Biological process	2	19	296	29901	10.6334	0.01495	0.066243	DUSP4//IL1B
GO:0043449	cellular alkene metabolic process	Biological process	2	19	296	29901	10.6334	0.01495	0.066243	ALOX12//FCER1A
GO:0051693	actin filament capping	Biological process	2	19	296	29901	10.6334	0.01495	0.066243	EVL//AVIL
GO:0043412	macromolecule modification	Biological process	21	1266	296	29901	1.67564	0.01517	0.0670926	FCER1A//SOCS3//TNF//UBE2C//ADAM10//BUB1B//CCND1//CDK1//HCK//WNT5A//DYRK3//CCNB1//NUAK1//DUSP22//DUSP4//BMI1//USP22//HSPA5//USP18//CD44//IL11
GO:0016192	vesicle-mediated transport	Biological process	10	452	296	29901	2.23489	0.01525	0.0673211	CADPS//LRP5//MSR1//SH3KBP1//PLEK//HCK//FCGR3//LBP//LAT2//FCER1A//KDELR1//STX11
GO:0001819	positive regulation of cytokine production	Biological process	3	53	296	29901	5.71794	0.01563	0.068616	IL1B//TNF//LBP//EREG
GO:0001841	neural tube formation	Biological process	3	53	296	29901	5.71794	0.01563	0.068616	T//TGIF1//VANGL2
GO:0046546	development of primary male sexual characteristics	Biological process	3	53	296	29901	5.71794	0.01563	0.068616	WNT5A//TESC//TEX15
GO:0032268	regulation of cellular protein metabolic process	Biological process	7	261	296	29901	2.70927	0.01568	0.0687085	SOCS3//TNF//FCER1A//KRT17//HSPA5//CD44//IL11
GO:0045137	development of primary sexual characteristics	Biological process	4	97	296	29901	4.16565	0.01589	0.0695005	RDH10//WNT5A//TESC//TEX15
GO:0001775	cell activation	Biological process	8	325	296	29901	2.48657	0.01622	0.0708134	LBP//PLCG2//PLEK//EVL//BMI1//LAT2//CD276//JAG2//FCER1A//FCGR3
GO:0001942	hair follicle development	Biological process	3	54	296	29901	5.61205	0.01643	0.0713368	PTGS2//KRT17//TNFRSF19
GO:0022404	molting cycle process	Biological process	3	54	296	29901	5.61205	0.01643	0.0713368	TNFRSF19//PTGS2//KRT17
GO:0022405	hair cycle process	Biological process	3	54	296	29901	5.61205	0.01643	0.0713368	TNFRSF19//PTGS2//KRT17
GO:0030835	negative regulation of actin filament depolymerization	Biological process	2	20	296	29901	10.1017	0.0165	0.0713798	EVL//AVIL
GO:0051651	maintenance of location in cell	Biological process	2	20	296	29901	10.1017	0.0165	0.0713798	KDELR1//CENPE
GO:0043062	extracellular structure organization	Biological process	5	150	296	29901	3.36723	0.01702	0.0733621	CYR61//TNFRSF11B//TNF//NOX1//GFOD2
GO:0060348	bone development	Biological process	5	150	296	29901	3.36723	0.01702	0.0733621	BMP7//SPP1//MMP13//PTGS2//CD276//CITED1
GO:0001934	positive regulation of protein amino acid phosphorylation	Biological process	3	55	296	29901	5.51001	0.01725	0.0740845	CD44//IL11//FCER1A
GO:0008154	actin polymerization or depolymerization	Biological process	3	55	296	29901	5.51001	0.01725	0.0740845	EVL//PLEK//AVIL
GO:0034621	cellular macromolecular complex subunit organization	Biological process	7	267	296	29901	2.64838	0.01753	0.0751512	GEMIN6//H1F0//EVL//STMN1//PLEK//PSRC1//AVIL
GO:0006913	nucleocytoplasmic transport	Biological process	4	100	296	29901	4.04068	0.01758	0.0752297	ARNTL//KPNA2//IPO7//ADAM10
GO:0001838	embryonic epithelial tube formation	Biological process	3	56	296	29901	5.41162	0.0181	0.0759666	T//TGIF1//VANGL2
GO:0072175	epithelial tube formation	Biological process	3	56	296	29901	5.41162	0.0181	0.0759666	T//TGIF1//VANGL2
GO:0007140	male meiosis	Biological process	2	21	296	29901	9.62066	0.01812	0.0759666	REC8//TEX15
GO:0009062	fatty acid catabolic process	Biological process	2	21	296	29901	9.62066	0.01812	0.0759666	LBP//SLC27A4
GO:0030318	melanocyte differentiation	Biological process	2	21	296	29901	9.62066	0.01812	0.0759666	CITED1//SOX21
GO:0030510	regulation of BMP signaling pathway	Biological process	2	21	296	29901	9.62066	0.01812	0.0759666	WNT5A//HTRA1
GO:0030856	regulation of epithelial cell differentiation	Biological process	2	21	296	29901	9.62066	0.01812	0.0759666	CCND1//KRT36
GO:0033002	muscle cell proliferation	Biological process	2	21	296	29901	9.62066	0.01812	0.0759666	EREG//HBEGF
GO:0043123	positive regulation of I-kappaB kinase/NF-kappaB cascade	Biological process	2	21	296	29901	9.62066	0.01812	0.0759666	IL1B//TNF
GO:0048545	response to steroid hormone stimulus	Biological process	2	21	296	29901	9.62066	0.01812	0.0759666	AREG//ACSBG1
GO:0071216	cellular response to biotic stimulus	Biological process	2	21	296	29901	9.62066	0.01812	0.0759666	HSPA5//CCND1
GO:0045860	positive regulation of protein kinase activity	Biological process	4	101	296	29901	4.00067	0.01817	0.0759666	FCER1A//EREG//HSPA5//CENPE
GO:0051169	nuclear transport	Biological process	4	101	296	29901	4.00067	0.01817	0.0759666	ARNTL//KPNA2//IPO7//ADAM10
GO:0002684	positive regulation of immune system process	Biological process	6	209	296	29901	2.90001	0.0182	0.0759666	FCGR3//FCER1A//BMI1//EREG//H2-EA//PLCG2//LAT2//LBP
GO:0042303	molting cycle	Biological process	3	57	296	29901	5.31668	0.01896	0.0787238	TNFRSF19//PTGS2//KRT17
GO:0042633	hair cycle	Biological process	3	57	296	29901	5.31668	0.01896	0.0787238	TNFRSF19//PTGS2//KRT17
GO:0046661	male sex differentiation	Biological process	3	57	296	29901	5.31668	0.01896	0.0787238	WNT5A//TESC//TEX15
GO:0007165	signal transduction	Biological process	40	2894	296	29901	1.39623	0.01947	0.0807003	FCER1A//DUSP4//EREG//CDK1//BHLHA15//SOCS3//ECT2//STMN1//PLCG2//RACGAP1//PLEK//TNF//WNT5A//REM2//ARL4C//CDC42EP1//CCND1//SOX17//WIF1//HSPA5//HTRA1//IL1B//IL1RL1//IL11//CD44//BMP7//DUSP22//ALDH1A3//TGIF1//T//ANG2//ARNTL//NPAS2//ID3//TNFRSF11B//ELK3//PLXNB1//ODZ4//FRMPD1//NIACR1
GO:0002478	antigen processing and presentation of exogenous peptide antigen	Biological process	2	22	296	29901	9.18335	0.0198	0.080938	H2-EA//FCGR3
GO:0006776	vitamin A metabolic process	Biological process	2	22	296	29901	9.18335	0.0198	0.080938	ALDH1A3//RDH10
GO:0031346	positive regulation of cell projection organization	Biological process	2	22	296	29901	9.18335	0.0198	0.080938	TNFRSF12A//PLXNB1
GO:0034976	response to endoplasmic reticulum stress	Biological process	2	22	296	29901	9.18335	0.0198	0.080938	HSPA5//CCND1
GO:0048806	genitalia development	Biological process	2	22	296	29901	9.18335	0.0198	0.080938	TCF7//TEX15
GO:0050728	negative regulation of inflammatory response	Biological process	2	22	296	29901	9.18335	0.0198	0.080938	GPX2//CD276
GO:0050729	positive regulation of inflammatory response	Biological process	2	22	296	29901	9.18335	0.0198	0.080938	FCGR3//FCER1A//LBP
GO:0050931	pigment cell differentiation	Biological process	2	22	296	29901	9.18335	0.0198	0.080938	CITED1//SOX21
GO:0006606	protein import into nucleus	Biological process	3	58	296	29901	5.22501	0.01986	0.0809863	ARNTL//KPNA2//IPO7
GO:0046903	secretion	Biological process	7	274	296	29901	2.58072	0.01988	0.0809863	FCER1A//FCGR3//CADPS//PLEK//LAT2//IL11//TNF//IL1B
GO:0051276	chromosome organization	Biological process	9	404	296	29901	2.25038	0.01997	0.0811966	H1F0//TEX15//FANCD2//REC8//BMI1//USP22//NCAPH//TOP2A//NCAPD2
GO:0051046	regulation of secretion	Biological process	4	104	296	29901	3.88527	0.02	0.0811966	FCER1A//IL11//TNF//IL1B
GO:0006869	lipid transport	Biological process	4	105	296	29901	3.84826	0.02063	0.0836113	SLC27A4//MSR1//LBP//APOB48R//PITPNC1
GO:0006665	sphingolipid metabolic process	Biological process	3	59	296	29901	5.13645	0.02077	0.0838924	SPP1//FAAH//PSAPL1
GO:0051170	nuclear import	Biological process	3	59	296	29901	5.13645	0.02077	0.0838924	ARNTL//KPNA2//IPO7
GO:0033674	positive regulation of kinase activity	Biological process	4	106	296	29901	3.81196	0.02128	0.0858065	FCER1A//EREG//HSPA5//CENPE
GO:0007595	lactation	Biological process	2	23	296	29901	8.78408	0.02155	0.0866011	AGPAT6//CCND1
GO:0051153	regulation of striated muscle cell differentiation	Biological process	2	23	296	29901	8.78408	0.02155	0.0866011	BOC//PROX1
GO:0051347	positive regulation of transferase activity	Biological process	4	107	296	29901	3.77633	0.02194	0.0880194	FCER1A//EREG//HSPA5//CENPE
GO:0044282	small molecule catabolic process	Biological process	5	161	296	29901	3.13717	0.02234	0.089473	BPGM//LBP//IRG1//SLC27A4//SMOX
GO:0007417	central nervous system development	Biological process	8	346	296	29901	2.33565	0.0226	0.0903377	BMI1//CITED1//HSPA5//ALDH1A3//ROBO1//NR4A2//SOX21//WNT5A
GO:0006643	membrane lipid metabolic process	Biological process	3	61	296	29901	4.96804	0.02267	0.0903377	FAAH//PSAPL1//SPP1
GO:0032870	cellular response to hormone stimulus	Biological process	3	61	296	29901	4.96804	0.02267	0.0903377	LPIN1//SOCS3//IL1B
GO:0019722	calcium-mediated signaling	Biological process	2	24	296	29901	8.41807	0.02335	0.0924271	FCER1A//BHLHA15
GO:0045185	maintenance of protein location	Biological process	2	24	296	29901	8.41807	0.02335	0.0924271	KDELR1//CENPE
GO:0051048	negative regulation of secretion	Biological process	2	24	296	29901	8.41807	0.02335	0.0924271	IL11//IL1B
GO:0060445	branching involved in salivary gland morphogenesis	Biological process	2	24	296	29901	8.41807	0.02335	0.0924271	TNF//BMP7
GO:0016337	cell-cell adhesion	Biological process	5	163	296	29901	3.09868	0.02341	0.0925104	PCDH12//CYR61//PLEK//ADAM8//BOC
GO:0035148	tube formation	Biological process	3	62	296	29901	4.88791	0.02365	0.0931488	T//TGIF1//VANGL2
GO:0071495	cellular response to endogenous stimulus	Biological process	3	62	296	29901	4.88791	0.02365	0.0931488	LPIN1//SOCS3//IL1B
GO:0001654	eye development	Biological process	5	164	296	29901	3.07978	0.02396	0.0942136	ALDH1A3//RDH10//PROX1//BMP7//TGIF1
GO:0051049	regulation of transport	Biological process	6	224	296	29901	2.70581	0.02458	0.0964477	IL1B//PLCG2//FCER1A//TNF//IL11//FCGR3
GO:0034504	protein localization in nucleus	Biological process	3	63	296	29901	4.81033	0.02465	0.0964477	ARNTL//KPNA2//IPO7
GO:0051605	protein maturation by peptide bond cleavage	Biological process	3	63	296	29901	4.81033	0.02465	0.0964477	ADAM10//PRSS12//ASPRV1
GO:0019318	hexose metabolic process	Biological process	5	166	296	29901	3.04268	0.02508	0.0972362	PCDH12//TNF//PGM2L1//BPGM//PMM1
GO:0001523	retinoid metabolic process	Biological process	2	25	296	29901	8.08135	0.02522	0.0972362	ALDH1A3//RDH10
GO:0002444	myeloid leukocyte mediated immunity	Biological process	2	25	296	29901	8.08135	0.02522	0.0972362	FCGR3//LAT2//FCER1A
GO:0006984	ER-nuclear signaling pathway	Biological process	2	25	296	29901	8.08135	0.02522	0.0972362	HSPA5//CCND1
GO:0007088	regulation of mitosis	Biological process	2	25	296	29901	8.08135	0.02522	0.0972362	CENPE//EREG
GO:0016101	diterpenoid metabolic process	Biological process	2	25	296	29901	8.08135	0.02522	0.0972362	ALDH1A3//RDH10
GO:0017015	regulation of transforming growth factor beta receptor signaling pathway	Biological process	2	25	296	29901	8.08135	0.02522	0.0972362	HSPA5//HTRA1
GO:0030837	negative regulation of actin filament polymerization	Biological process	2	25	296	29901	8.08135	0.02522	0.0972362	EVL//AVIL
GO:0051783	regulation of nuclear division	Biological process	2	25	296	29901	8.08135	0.02522	0.0972362	CENPE//EREG
GO:0005975	carbohydrate metabolic process	Biological process	9	422	296	29901	2.15439	0.02553	0.0982719	PCDH12//TNF//PGM2L1//GDPD5//BPGM//PGLYRP1//PMM1//PLCG2//NPL
GO:0016567	protein ubiquitination	Biological process	3	64	296	29901	4.73517	0.02568	0.0985299	BMI1//HSPA5//UBE2C
GO:0043193	positive regulation of gene-specific transcription	Biological process	3	64	296	29901	4.73517	0.02568	0.0985299	FOXM1//IL1B//PSRC1
GO:0043069	negative regulation of programmed cell death	Biological process	6	228	296	29901	2.65834	0.0265	0.101512	ALOX12//SPP1//MYC//RTN4//BMI1//CD44//NR4A2//PLCG2
GO:0019748	secondary metabolic process	Biological process	3	65	296	29901	4.66232	0.02673	0.102228	ALDH1A3//RDH10//CITED1
GO:0001702	gastrulation with mouth forming second	Biological process	2	26	296	29901	7.77053	0.02715	0.103005	LRP5//ODZ4
GO:0001947	heart looping	Biological process	2	26	296	29901	7.77053	0.02715	0.103005	SOX17//VANGL2
GO:0006721	terpenoid metabolic process	Biological process	2	26	296	29901	7.77053	0.02715	0.103005	ALDH1A3//RDH10
GO:0044419	interspecies interaction between organisms	Biological process	2	26	296	29901	7.77053	0.02715	0.103005	GPX2//SLC20A2
GO:0045667	regulation of osteoblast differentiation	Biological process	2	26	296	29901	7.77053	0.02715	0.103005	CITED1//CD276
GO:0006323	DNA packaging	Biological process	4	115	296	29901	3.51363	0.02767	0.104811	H1F0//NCAPH//TOP2A//NCAPD2
GO:0035107	appendage morphogenesis	Biological process	4	116	296	29901	3.48334	0.02844	0.107385	GJA5//WNT5A//RDH10//LRP5
GO:0035108	limb morphogenesis	Biological process	4	116	296	29901	3.48334	0.02844	0.107385	GJA5//WNT5A//RDH10//LRP5
GO:0001657	ureteric bud development	Biological process	3	67	296	29901	4.52314	0.0289	0.108776	CD44//CITED1//MYC//BMP7
GO:0009309	amine biosynthetic process	Biological process	3	67	296	29901	4.52314	0.0289	0.108776	PYCR1//PSAT1//NR4A2
GO:0034622	cellular macromolecular complex assembly	Biological process	6	233	296	29901	2.60129	0.02904	0.10913	GEMIN6//H1F0//EVL//STMN1//PSRC1//AVIL
GO:0019884	antigen processing and presentation of exogenous antigen	Biological process	2	27	296	29901	7.48273	0.02913	0.109295	H2-EA//FCGR3
GO:0043623	cellular protein complex assembly	Biological process	4	117	296	29901	3.45357	0.02922	0.10946	EVL//STMN1//PSRC1//AVIL
GO:0010876	lipid localization	Biological process	4	118	296	29901	3.4243	0.03002	0.11228	SLC27A4//LBP//APOB48R//PITPNC1//MSR1
GO:0044106	cellular amine metabolic process	Biological process	6	235	296	29901	2.57915	0.0301	0.112402	RARS//ASPG//PYCR1//PSAT1//NR4A2//SMOX
GO:0001709	cell fate determination	Biological process	2	28	296	29901	7.21549	0.03117	0.115851	JAG2//PROX1
GO:0031348	negative regulation of defense response	Biological process	2	28	296	29901	7.21549	0.03117	0.115851	GPX2//CD276
GO:0051147	regulation of muscle cell differentiation	Biological process	2	28	296	29901	7.21549	0.03117	0.115851	BOC//PROX1
GO:0048736	appendage development	Biological process	4	120	296	29901	3.36723	0.03166	0.117305	GJA5//WNT5A//RDH10//LRP5
GO:0060173	limb development	Biological process	4	120	296	29901	3.36723	0.03166	0.117305	GJA5//WNT5A//RDH10//LRP5
GO:0019953	sexual reproduction	Biological process	8	370	296	29901	2.18415	0.03187	0.117899	REC8//FANCD2//TEX15//JAG2//S100A11//RACGAP1//NKD1//RHOX5
GO:0003001	generation of a signal involved in cell-cell signaling	Biological process	4	121	296	29901	3.3394	0.03249	0.119819	FCER1A//FCGR3//IL11//IL1B
GO:0042742	defense response to bacterium	Biological process	4	121	296	29901	3.3394	0.03249	0.119819	HCK//LBP//TNF//PGLYRP1//DEFA20
GO:0006775	fat-soluble vitamin metabolic process	Biological process	2	29	296	29901	6.96668	0.03326	0.122279	ALDH1A3//RDH10
GO:0010811	positive regulation of cell-substrate adhesion	Biological process	2	29	296	29901	6.96668	0.03326	0.122279	CYR61//SPP1//THBS1
GO:0043405	regulation of MAP kinase activity	Biological process	3	72	296	29901	4.20904	0.03472	0.127253	FCER1A//DUSP4//IL1B
GO:0045444	fat cell differentiation	Biological process	3	72	296	29901	4.20904	0.03472	0.127253	LPIN1//SH3PXD2B//CCND1
GO:0002712	regulation of B cell mediated immunity	Biological process	2	30	296	29901	6.73446	0.03541	0.129383	FCGR3//FCER1A
GO:0002889	regulation of immunoglobulin mediated immune response	Biological process	2	30	296	29901	6.73446	0.03541	0.129383	FCGR3//FCER1A
GO:0045184	establishment of protein localization	Biological process	12	670	296	29901	1.80926	0.03592	0.131007	ARNTL//KPNA2//IPO7//STX11//CADPS//SLC15A3//KDELR1//TMEM48//MSR1//TNF//PLEK//CENPE
GO:0071103	DNA conformation change	Biological process	4	125	296	29901	3.23254	0.03597	0.131007	H1F0//TOP2A//NCAPH//NCAPD2
GO:0044262	cellular carbohydrate metabolic process	Biological process	7	311	296	29901	2.27369	0.03602	0.131007	PCDH12//TNF//PGM2L1//GDPD5//BPGM//PMM1//PLCG2
GO:0017038	protein import	Biological process	3	74	296	29901	4.09528	0.03721	0.135128	ARNTL//KPNA2//IPO7
GO:0007435	salivary gland morphogenesis	Biological process	2	31	296	29901	6.51722	0.03761	0.136164	BMP7//TNF
GO:0043242	negative regulation of protein complex disassembly	Biological process	2	31	296	29901	6.51722	0.03761	0.136164	EVL//AVIL
GO:0001822	kidney development	Biological process	4	127	296	29901	3.18163	0.03778	0.136364	RDH10//BMP7//CD44//CITED1//MYC
GO:0072001	renal system development	Biological process	4	127	296	29901	3.18163	0.03778	0.136364	RDH10//BMP7//CD44//CITED1//MYC
GO:0005996	monosaccharide metabolic process	Biological process	5	186	296	29901	2.71551	0.03815	0.137362	PCDH12//TNF//PGM2L1//BPGM//PMM1
GO:0007283	spermatogenesis	Biological process	6	249	296	29901	2.43414	0.03823	0.137362	REC8//TEX15//JAG2//S100A11//RACGAP1//NKD1
GO:0048232	male gamete generation	Biological process	6	249	296	29901	2.43414	0.03823	0.137362	TEX15//JAG2//S100A11//RACGAP1//NKD1//REC8
GO:0016054	organic acid catabolic process	Biological process	3	75	296	29901	4.04068	0.03848	0.137636	LBP//IRG1//SLC27A4
GO:0032446	protein modification by small protein conjugation	Biological process	3	75	296	29901	4.04068	0.03848	0.137636	UBE2C//BMI1//HSPA5
GO:0046395	carboxylic acid catabolic process	Biological process	3	75	296	29901	4.04068	0.03848	0.137636	LBP//IRG1//SLC27A4
GO:0000075	cell cycle checkpoint	Biological process	2	32	296	29901	6.31356	0.03986	0.141718	CENPE//CDK1
GO:0008286	insulin receptor signaling pathway	Biological process	2	32	296	29901	6.31356	0.03986	0.141718	SOCS3//IL1B
GO:0009119	ribonucleoside metabolic process	Biological process	2	32	296	29901	6.31356	0.03986	0.141718	NME4//DCAKD
GO:0018105	peptidyl-serine phosphorylation	Biological process	2	32	296	29901	6.31356	0.03986	0.141718	CD44//IL11
GO:0065003	macromolecular complex assembly	Biological process	7	319	296	29901	2.21667	0.0404	0.143423	GEMIN6//H1F0//EVL//STMN1//PSRC1//PLEK//AVIL
GO:0023060	signal transmission	Biological process	41	3143	296	29901	1.31775	0.04082	0.144698	ELK3//FCER1A//DUSP4//FCGR3//ANG2//ARNTL//REM2//IL1RL1//NPAS2//ID3//TNFRSF11B//WNT5A//PLCG2//PLXNB1//ODZ4//RACGAP1//FRMPD1//NIACR1//EREG//CDK1//BHLHA15//SOCS3//ECT2//STMN1//PLEK//TNF//ARL4C//CDC42EP1//CCND1//SOX17//WIF1//HSPA5//HTRA1//IL1B//IL11//CD44//BMP7//DUSP22//ALDH1A3//TGIF1//T
GO:0023046	signaling process	Biological process	41	3144	296	29901	1.31733	0.04099	0.145084	ELK3//FCER1A//DUSP4//FCGR3//ANG2//ARNTL//REM2//IL1RL1//NPAS2//ID3//TNFRSF11B//WNT5A//PLCG2//PLXNB1//ODZ4//RACGAP1//FRMPD1//NIACR1//EREG//CDK1//BHLHA15//SOCS3//ECT2//STMN1//PLEK//TNF//ARL4C//CDC42EP1//CCND1//SOX17//WIF1//HSPA5//HTRA1//IL1B//IL11//CD44//BMP7//DUSP22//ALDH1A3//TGIF1//T
GO:0007623	circadian rhythm	Biological process	2	33	296	29901	6.12224	0.04216	0.148341	NPAS2//ARNTL
GO:0014032	neural crest cell development	Biological process	2	33	296	29901	6.12224	0.04216	0.148341	SEMA3F//RDH10
GO:0014033	neural crest cell differentiation	Biological process	2	33	296	29901	6.12224	0.04216	0.148341	SEMA3F//RDH10
GO:0046148	pigment biosynthetic process	Biological process	2	33	296	29901	6.12224	0.04216	0.148341	UROS//CITED1
GO:0048871	multicellular organismal homeostasis	Biological process	3	78	296	29901	3.88527	0.04244	0.149105	GPX2//IL1B//TEX15
GO:0044267	cellular protein metabolic process	Biological process	29	2101	296	29901	1.39433	0.04419	0.154549	FCER1A//SOCS3//CDCA3//USP22//USP18//PMEPA1//UBE2C//TNF//CCT3//CCT6A//RARS//ADAM10//BUB1B//CCND1//CDK1//HCK//WNT5A//DYRK3//CCNB1//NUAK1//DUSP22//DUSP4//SP6//KRT17//BMI1//HSPA5//CD44//IL11//HSPH1
GO:0001658	branching involved in ureteric bud morphogenesis	Biological process	2	34	296	29901	5.94217	0.04451	0.154549	CD44//CITED1//MYC
GO:0002821	positive regulation of adaptive immune response	Biological process	2	34	296	29901	5.94217	0.04451	0.154549	FCGR3//FCER1A
GO:0002824	positive regulation of adaptive immune response based on somatic recombination of immune receptors built from immunoglobulin superfamily domains	Biological process	2	34	296	29901	5.94217	0.04451	0.154549	FCGR3//FCER1A
GO:0009880	embryonic pattern specification	Biological process	2	34	296	29901	5.94217	0.04451	0.154549	PCSK6//BMP7
GO:0030522	intracellular receptor-mediated signaling pathway	Biological process	2	34	296	29901	5.94217	0.04451	0.154549	ALDH1A3//TGIF1
GO:0035051	cardiac cell differentiation	Biological process	2	34	296	29901	5.94217	0.04451	0.154549	PROX1//SOX17
GO:0060675	ureteric bud morphogenesis	Biological process	2	34	296	29901	5.94217	0.04451	0.154549	CD44//CITED1//MYC
GO:0006897	endocytosis	Biological process	5	195	296	29901	2.59018	0.04516	0.155997	MSR1//HCK//FCGR3//LBP//LRP5//SH3KBP1
GO:0010324	membrane invagination	Biological process	5	195	296	29901	2.59018	0.04516	0.155997	LRP5//MSR1//SH3KBP1//HCK//FCGR3//LBP
GO:0003007	heart morphogenesis	Biological process	3	80	296	29901	3.78813	0.04519	0.155997	SOX17//VANGL2//PROX1
GO:0048592	eye morphogenesis	Biological process	3	80	296	29901	3.78813	0.04519	0.155997	ALDH1A3//PROX1//BMP7
GO:0008406	gonad development	Biological process	3	81	296	29901	3.74137	0.04659	0.160304	WNT5A//TESC//RDH10
GO:0016064	immunoglobulin mediated immune response	Biological process	3	81	296	29901	3.74137	0.04659	0.160304	FCGR3//FCER1A//H2-EA
GO:0006641	triglyceride metabolic process	Biological process	2	35	296	29901	5.77239	0.04691	0.160304	AGPAT6//APOB48R
GO:0007431	salivary gland development	Biological process	2	35	296	29901	5.77239	0.04691	0.160304	BMP7//TNF
GO:0046883	regulation of hormone secretion	Biological process	2	35	296	29901	5.77239	0.04691	0.160304	IL11//IL1B
GO:0051781	positive regulation of cell division	Biological process	2	35	296	29901	5.77239	0.04691	0.160304	EREG//IL1B
GO:0060041	retina development in camera-type eye	Biological process	2	35	296	29901	5.77239	0.04691	0.160304	PROX1//TGIF1
GO:0007423	sensory organ development	Biological process	6	263	296	29901	2.30457	0.04764	0.162565	BMP7//ALDH1A3//JAG2//RDH10//MYC//PROX1//TGIF1
GO:0007369	gastrulation	Biological process	3	82	296	29901	3.69574	0.04802	0.163626	LRP5//ODZ4//BMP7
GO:0032103	positive regulation of response to external stimulus	Biological process	2	36	296	29901	5.61205	0.04935	0.167468	FCGR3//FCER1A//LBP
GO:0048066	pigmentation during development	Biological process	2	36	296	29901	5.61205	0.04935	0.167468	CITED1//SOX21
GO:0019724	B cell mediated immunity	Biological process	3	83	296	29901	3.65121	0.04947	0.167468	FCGR3//FCER1A//H2-EA
GO:0030155	regulation of cell adhesion	Biological process	3	83	296	29901	3.65121	0.04947	0.167468	CYR61//SPP1//THBS1//JAG2
GO:0034641	cellular nitrogen compound metabolic process	Biological process	7	334	296	29901	2.11712	0.0495	0.167468	RARS//ASPG//PYCR1//PSAT1//UROS//NR4A2//SMOX
GO:0045087	innate immune response	Biological process	4	139	296	29901	2.90696	0.04976	0.168108	CITED1//EREG//LBP//IL1RL1//TMEM173
